# Supplementary material for: PerTurboID, a targeted in situ method reveals the impact of kinase deletion on its local protein environment in the cytoadhesion complex of malaria-causing parasites
Source: eLife. 2023 Sep 22;12:e86367. doi: 10.7554/eLife.86367 (PMC10564455; doi:10.7554/eLife.86367)
Supplement: Supplementary file 1. [file elife-86367-supp1.xlsx]

## Sheet: FIKK41pulseraw
Supplementary Table 1: Unfiltered data for FIKK4.1-TurboID experiment. iBAQ and LFQ intensities were Log2-transformed. Contaminants, protein IDs originating from reverse decoy sequences, and those only identified by site were removed. iBAQ intensities were further processed.
Protein IDs	Majority protein IDs	Organism	Protein Name PF	Protein Name HS	Gene names	iBAQ NF54_1_16h	iBAQ NF54_2_16h	iBAQ NF54_3_16h	iBAQ FIKK41_1_16h	iBAQ FIKK41_2_16h	iBAQ FIKK41_3_16h	iBAQ NF54_1_40h	iBAQ NF54_2_40h	iBAQ NF54_3_40h	iBAQ FIKK41_1_40h	iBAQ FIKK41_2_40h	iBAQ FIKK41_3_40h	LFQ intensity NF54_1_16h	LFQ intensity NF54_2_16h	LFQ intensity NF54_3_16h	LFQ intensity FIKK41_1_16h	LFQ intensity FIKK41_2_16h	LFQ intensity FIKK41_3_16h	LFQ intensity NF54_1_40h	LFQ intensity NF54_2_40h	LFQ intensity NF54_3_40h	LFQ intensity FIKK41_1_40h	LFQ intensity FIKK41_2_40h	LFQ intensity FIKK41_3_40h	Mol. weight [kDa]	Exported?	PF	HS	Intensity	Score	Only identified by site	Reverse	Potential contaminant	MS/MS Count	MS/MS Count NF54_1_16h	MS/MS Count NF54_2_16h	MS/MS Count NF54_3_16h	MS/MS Count FIKK41_1_16h	MS/MS Count FIKK41_2_16h	MS/MS Count FIKK41_3_16h	MS/MS Count NF54_1_40h	MS/MS Count NF54_2_40h	MS/MS Count NF54_3_40h	MS/MS Count FIKK41_1_40h
P02656	P02656	Homo sapiens		Apolipoprotein C-III	APOC3	20.8722	20.3356	20.4858	20.5093	20.8675	21.1282		21.3957	20.4882	20.3345	22.9979	20.8682	23.7286	23.2961	23.2961	22.8727	23.0878	23.0593		23.5045	22.8851		25.0526		10.852		0	1	8.26425	3.7589				21	2	2	1	2	1	3	1	1	2	1
A6NGD5;P0CG00	A6NGD5;P0CG00	Homo sapiens		Zinc finger and SCAN domain-containing protein 5C;Putative zinc finger and SCAN domain-containing protein 5D	ZSCAN5C;ZSCAN5DP				16.9631	16.7668	18.5873												21.7936							55.728		0	1	7.03193	2.0019				1	0	0	0	0	0	1	0	0	0	0
Q8N2N9;A6QL64;Q5JPF3	Q8N2N9;A6QL64;Q5JPF3	Homo sapiens		Ankyrin repeat domain-containing protein 36B;Ankyrin repeat domain-containing protein 36A;Ankyrin repeat domain-containing protein 36C	ANKRD36B;ANKRD36;ANKRD36C							16.2905	16.222	16.3308	16.1975	16.7333	16.0952											22.268		153.58		0	1	7.57945	3.51				3	0	0	0	0	0	0	1	0	0	0
B1AJZ9	B1AJZ9	Homo sapiens		Forkhead-associated domain-containing protein 1	FHAD1																									161.9		0	1	NaN	1.9494				2	0	0	0	0	0	1	0	0	0	1
O00161	O00161	Homo sapiens		Synaptosomal-associated protein 23	SNAP23				19.7203	19.7227	19.7752				18.0698	18.1572	18.5687				22.6432	22.611	22.7497							23.354		0	1	7.63338	5.6624				11	0	0	0	2	4	2	0	0	0	1
O15212	O15212	Homo sapiens		Prefoldin subunit 6	PFDN6																									14.582		0	1	NaN	2.138				2	0	0	0	1	0	0	0	0	0	0
O15440	O15440	Homo sapiens		Multidrug resistance-associated protein 5	ABCC5				16.1521	15.9281	16.6036				16.0187		16.5387				21.6439	21.2323	21.5968				21.4725		21.083	160.66		0	1	7.41098	8.779				14	0	0	0	2	2	5	0	0	0	1
O43491	O43491	Homo sapiens		Band 4.1-like protein 2	EPB41L2				17.0442	14.6018	17.0032												21.9034							112.59		0	1	7.20483	3.9935				3	0	0	0	0	1	1	0	0	0	0
O43749	O43749	Homo sapiens		Olfactory receptor 1F1	OR1F1					21.9289												22.3101								34.866		0	1	6.90229	2.288				2	0	0	0	0	2	0	0	0	0	0
O75387	O75387	Homo sapiens		Large neutral amino acids transporter small subunit 3	SLC43A1					20.4977	20.7328				19.7279								23.8481							61.476		0	1	7.81601	5.6836				4	0	0	0	0	1	2	0	0	0	1
O95819	O95819	Homo sapiens		Mitogen-activated protein kinase kinase kinase kinase 4	MAP4K4	15.3557		15.6429							22.3805	21.7529	21.9881			21.4874										142.1		0	1	8.8703	2.7625				1	0	0	0	0	0	0	0	0	0	0
P00915	P00915	Homo sapiens		Carbonic anhydrase 1	CA1	23.48	22.535	23.4298	23.7286	23.1554	23.9134	24.1095	24.7796	25.0691	24.6431	23.9134	25.1681	27.5536	26.8504	27.509	26.8142	26.2535	26.9089	27.9923	27.7195	28.4154	27.2354	26.2909	27.1795	28.87		0	1	9.50792	100.38				162	11	11	11	9	10	12	13	22	21	10
P00918	P00918	Homo sapiens		Carbonic anhydrase 2	CA2	20.493	17.3724	18.852	18.0684	17.3575	18.7631	19.932	20.6598	21.0292	20.3304	19.9059	22.0065	23.8191		23.0075			22.8677	23.654	23.7895	24.3975	23.2961	22.8511	23.8288	29.246		0	1	8.26979	16.476				23	4	0	0	0	1	1	1	3	3	1
P01024	P01024	Homo sapiens		Complement C3;Complement C3 beta chain;C3-beta-c;Complement C3 alpha chain;C3a anaphylatoxin;Acylation stimulating protein;Complement C3b alpha chain;Complement C3c alpha chain fragment 1;Complement C3dg fragment;Complement C3g fragment;Complement C3d fragment;Complement C3f fragment;Complement C3c alpha chain fragment 2	C3	16.8885				18.1557							18.01	23.4923												187.15		0	1	7.81755	24.621				3	1	0	0	0	1	0	0	0	0	0
P02042	P02042	Homo sapiens		Hemoglobin subunit delta	HBD	27.3494	26.9869	27.0608	26.9539	27.4154	27.4629	27.0401	27.3494	27.7325	26.7895	27.0608	27.217	30.8459	30.5754	30.5014	29.766	30.0217	30.0084	30.5014	29.8973	30.6544	29.4433	29.6458	29.003	16.055		0	1	10.3162	32.7				178	17	12	12	12	13	15	11	14	17	13
P02549	P02549	Homo sapiens		Spectrin alpha chain, erythrocytic 1	SPTA1	18.9922	19.4648	19.8625	21.8242	22.1112	22.6987	20.3482	21.4244	21.6358	22.9621	21.604	23.3645	26.9869	27.5389	27.7581	28.2308	28.2216	28.6492	27.8324	27.9316	28.2123	28.7031	27.8916	28.726	280.01		0	1	9.78785	323.31				546	19	26	26	52	50	68	29	37	46	73
P02701	P02701	Homo sapiens				33.5062	33.5296	33.5978	33.6307	33.7454	33.8042	33.8233	33.6415	33.2759	33.5978	33.3436	33.6944	36.332	36.394	36.3033	35.8974	35.8769	35.8328	36.4365	35.7653	36.1453	35.4303	35.099	35.179	16.768		0	0	12.0997	323.31				3527	334	287	309	309	287	296	301	277	300	289
P02730	P02730	Homo sapiens		Band 3 anion transport protein	SLC4A1	20.1507	19.7062	20.0499	24.8044	24.6865	24.6649	19.6301	22.2975	22.1557	25.3612	24.5869	25.6096	25.8142	25.4105	26.0296	29.6268	29.4746	29.1842	24.6209	26.9202	27.1604	29.2077	28.6527	28.995	101.79		0	1	9.89112	142.06				118	3	0	2	15	14	14	1	7	6	17
P04040	P04040	Homo sapiens		Catalase	CAT	19.5599	19.6291	19.7913	18.989	18.9757	19.1983	19.8548	20.2416	20.07	19.1611	19.2664	19.7629	24.1719	24.5225	24.632	23.4551	23.4676	23.6971	24.7543	24.2535	24.558	23.4923	22.9252	23.48	59.755		0	1	8.44119	13.732				36	1	0	4	5	3	2	3	5	4	2
P04406;O14556	P04406	Homo sapiens		Glyceraldehyde-3-phosphate dehydrogenase	GAPDH	17.4266	18.1987	17.8721	18.811	19.5264	19.6503	20.7762	22.9147	22.3958	21.0218	22.2277	22.6344							25.4425	26.0084	26.0484	24.1946	25.8599	24.9316	36.053		0	1	8.72913	135.04				45	1	1	1	2	1	1	3	10	7	2
P04921	P04921	Homo sapiens		Glycophorin-C	GYPC									20.2658			20.6079									20.7999				13.81		0	1	6.75721	3.3585				4	0	0	0	0	0	0	0	1	1	0
P06703	P06703	Homo sapiens		Protein S100-A6	S100A6	22.1608	22.295	21.6221	18.105	17.5237	17.6466	22.9734	22.9952	22.5501	18.1394		17.7513		24.989	24.5463				25.1174	24.4488	24.3101				10.18		0	1	8.26701	3.8478				11	0	1	1	1	1	0	3	1	2	1
P07195	P07195	Homo sapiens		L-lactate dehydrogenase B chain	LDHB	18.5576	18.1009				18.7108	18.8721	19.0568	19.3177										23.1629		22.8122				36.638		0	1	7.67365	2.6109				6	1	0	0	0	0	1	1	2	1	0
P0C0L4;P0C0L5	P0C0L4;P0C0L5	Homo sapiens		Complement C4-A;Complement C4 beta chain;Complement C4-A alpha chain;C4a anaphylatoxin;C4b-A;C4d-A;Complement C4 gamma chain;Complement C4-B;Complement C4 beta chain;Complement C4-B alpha chain;C4a anaphylatoxin;C4b-B;C4d-B;Complement C4 gamma chain	C4A;C4B										14.3765												19.762			192.78		0	1	6.23626	2.6038				1	0	0	0	0	0	0	0	0	0	1
P62987;P62979;P0CG47;P0CG48	P62987;P62979;P0CG47;P0CG48	Homo sapiens		Ubiquitin-60S ribosomal protein L40;Ubiquitin;60S ribosomal protein L40;Ubiquitin-40S ribosomal protein S27a;Ubiquitin;40S ribosomal protein S27a;Polyubiquitin-B;Ubiquitin;Polyubiquitin-C;Ubiquitin	UBA52;RPS27A;UBB;UBC	22.4725	22.0244	22.0758	24.391	23.3511	24.2891	22.5959	22.3839	23.1226	24.6486	23.8385	24.8336									25.2426				14.728		0	1	8.98161	9.8277				17	1	1	1	2	1	1	2	0	0	2
P10599	P10599	Homo sapiens		Thioredoxin	TXN						18.9245												20.8506							11.737		0	1	6.54193	2.1831				3	0	0	0	0	1	2	0	0	0	0
P11142;P54652	P11142	Homo sapiens		Heat shock cognate 71 kDa protein	HSPA8	18.2887	17.7867	18.6934	20.0338	19.9816	20.9228	19.1081	19.9201	19.7459	21.0389	19.9293	21.3815				24.2317	24.3101	24.7645	24.6595	24.4614	24.604	24.7077	24.5225	24.7695	70.897		0	1	8.64524	14.947				45	0	0	1	6	5	6	1	4	0	8
P11166	P11166	Homo sapiens		Solute carrier family 2, facilitated glucose transporter member 1	SLC2A1	20.8168	20.3764	22.1502	24.2096	23.7995	25.5105	20.3658	20.2858	21.4378	24.7895	21.9796	25.0317	25.3844	25.1719	25.8811	27.6527	26.8385	27.9428	25.4707	24.3443	25.5754	27.0813	25.3578	27.1312	54.083		0	1	9.32461	34.414				79	2	2	7	11	11	13	4	2	2	10
P11171;Q9Y2J2;Q9H4G0	P11171	Homo sapiens		Protein 4.1	EPB41	16.5832	15.6681	15.9164	27.1015	27.141	27.6181	17.6125	18.8186	18.5365	27.2354	26.6181	27.6389	21.6636			31.8459	31.7771	31.94	22.96	22.7783	23.3239	31.525	30.8682	31.4083	97.016		0	1	10.6203	323.31				926	1	1	2	139	138	154	2	5	5	144
P11277;Q01082;O15020	P11277	Homo sapiens		Spectrin beta chain, erythrocytic	SPTB	17.1801	17.9082	18.2694	22.8805	23.0131	23.5285	18.5787	20.5427	20.7534	21.8556	21.1502	22.4148	25.0105	25.6458	25.9803	29.2935	29.2692	29.5772	26.3562	27.189	27.4785	27.6998	27.0914	28.0453	246.47		0	1	9.75159	323.31				495	8	10	10	76	75	97	13	29	34	47
P16157;Q01484	P16157	Homo sapiens		Ankyrin-1	ANK1	18.987	18.9608	19.4684	23.5285	23.7895	24.2244	20.07	20.429	20.7311	24.7945	23.1242	24.9672	26.1681	26.527	26.9977	29.362	29.4294	29.6629	27.4154	27.0505	27.3578	29.9539	28.6964	29.9259	206.26		0	1	10.0306	323.31				546	11	9	19	60	56	69	15	23	24	99
P16452	P16452	Homo sapiens		Erythrocyte membrane protein band 4.2	EPB42		16.9894	14.1201	19.2448	19.06	19.2778	16.998		17.3811	19.0543	18.9445	19.8201				23.4425	23.4041	23.4551				23.2961	24.2244	23.5285	77.008		0	1	8.19429	38.731				26	0	1	0	2	4	5	0	2	2	2
P17066;P48741	P17066;P48741	Homo sapiens		Heat shock 70 kDa protein 6;Putative heat shock 70 kDa protein 7	HSPA6;HSPA7				17.1274	17.0917	17.8603				18.3339	17.3874	18.6935												22.4643	71.027		0	1	7.72855	2.0207				4	0	0	0	0	1	0	0	0	0	1
P21580	P21580	Homo sapiens		Tumor necrosis factor alpha-induced protein 3;A20p50;A20p37	TNFAIP3										11.1229	17.082												21.9045		89.613		0	1	6.82122	2.4133				3	0	0	0	0	0	0	0	0	0	0
P23276	P23276	Homo sapiens		Kell blood group glycoprotein	KEL				19.4709	19.4534	19.9276				18.7582	16.4264	18.945				23.9134	23.8858	24.1095				22.9246		22.6829	82.823		0	1	8.05983	6.8663				15	0	0	0	4	3	2	0	0	0	3
P23588	P23588	Homo sapiens		Eukaryotic translation initiation factor 4B	EIF4B				18.9824	19.0746	19.4072				18.7722	16.5117	18.9609				23.2961	23.2961	22.8322				22.7292		22.5566	69.15		0	1	7.88111	10.389				24	0	0	0	5	6	4	0	1	0	2
P23634;P20020;Q01814	P23634	Homo sapiens		Plasma membrane calcium-transporting ATPase 4	ATP2B4				20.2445	20.062	20.5179				21.3985	20.1892	21.9523				25.7389	25.5285	25.7518				26.0169	25.7771	25.9539	137.92		0	1	8.83737	85.895				77	0	0	0	10	10	11	0	0	0	16
P27105	P27105	Homo sapiens		Erythrocyte band 7 integral membrane protein	STOM				23.3101	22.6471	23.2821				23.2961	20.3873	23.8191				26.4457	26.0629	26.4057				26.0105	25.2891	26.1469	31.73		0	1	8.9062	61.834				33	0	0	0	6	4	7	0	0	1	5
P27815	P27815	Homo sapiens		cAMP-specific 3,5-cyclic phosphodiesterase 4A	PDE4A	20.6456	20.3719	20.3016		20.5957	20.6818	21.3863	21.5872	21.5833	20.5057	19.6729	20.0625									25.632				98.142		0	1	8.88102	2.0399				11	1	0	2	0	2	0	1	0	3	1
P28289	P28289	Homo sapiens		Tropomodulin-1	TMOD1				19.1499	20.0585	19.522										23.2678	23.0216	23.3239							40.569		0	1	7.66374	7.35				8	0	0	0	3	2	3	0	0	0	0
P29972	P29972	Homo sapiens		Aquaporin-1	AQP1											22.3989												23.6649		28.526		0	1	7.3448	6.5925				2	0	0	0	0	0	0	0	0	0	0
P30043	P30043	Homo sapiens		Flavin reductase (NADPH)	BLVRB	19.8937	19.5178	18.7391	20.0942	20.5726	20.9316	19.8677	22.1621	22.1068	20.7584	21.2113	22.1323	23.6209	23.4923		23.4551	23.5285	23.5754	23.7182	24.8288	24.6376	23.3239	24.1642	24.019	22.119		0	1	8.45312	23.127				42	3	3	1	0	3	5	3	6	5	4
P32119;Q06830	P32119	Homo sapiens		Peroxiredoxin-2	PRDX2	20.7284	19.8436	20.3913	21.8841	22.3032	22.5737	21.3666	22.8616	23.1314	23.4676	23.4425	24.1332				25.4457	25.654	25.6012	25.4953	26.1469	26.5898	25.9383	25.8623	26.0608	21.892		0	1	9.01845	18.822				34	2	0	0	4	1	3	0	2	6	4
P35240	P35240	Homo sapiens		Merlin	NF2				18.5897	17.42	16.9535				18.8275	17.612	17.2447				23.2333									69.689		0	1	7.72523	5.1364				7	0	0	0	1	1	1	0	0	0	3
P35611	P35611	Homo sapiens		Alpha-adducin	ADD1				23.2378	23.5165	23.8191				24.1332	22.922	24.5754				27.8504	27.8264	27.9595				27.5165	27.0296	27.3239	80.954		0	1	9.37603	99.886				146	0	0	0	28	28	31	0	0	0	25
P35612	P35612	Homo sapiens		Beta-adducin	ADD2	19.1181	19.157	18.0968	25.8142	25.8215	26.3728	14.5832	15.9788	15.3269	25.9584	25.0062	26.3049				30.4032	30.2869	30.5203				29.995	29.6578	29.9117	80.853		0	1	10.1336	323.31				484	0	1	0	83	77	101	0	1	1	80
P37840	P37840	Homo sapiens		Alpha-synuclein	SNCA	15.4448			25.317	25.3135	25.8361	16.9349	17.2313	16.8208	25.5926	25.4073	26.1776				27.5463	27.2803	27.4473				27.2979	26.5725	27.509	14.46		0	1	9.27619	62.727				46	1	0	0	8	6	8	0	1	1	5
P42331	P42331	Homo sapiens		Rho GTPase-activating protein 25	ARHGAP25	19.3546	19.7536	19.3987	19.8147	20.0625	19.6917	19.4238	20.3524	19.7695	19.9826	19.5144										24.6264				73.434		0	1	8.59462	2.0997				11	1	1	2	1	1	1	0	1	0	1
P48426	P48426	Homo sapiens		Phosphatidylinositol 5-phosphate 4-kinase type-2 alpha	PIP4K2A											18.8498	19.998												22.7291	46.224		0	1	7.43699	3.2525				2	0	0	0	0	0	0	0	0	0	0
P54315	P54315	Homo sapiens		Inactive pancreatic lipase-related protein 1	PNLIPRP1				17.1007	17.6434	17.6903	17.5493	16.852	17.3036												21.4815				51.847		0	1	7.41022	2.0316				6	1	0	0	1	1	1	1	1	0	0
P60174	P60174	Homo sapiens		Triosephosphate isomerase	TPI1	16.7994	16.9555	16.641	15.8755	16.9754	17.22	17.446	18.4697	18.7498	16.6294	17.1209	17.0002	21.5355	21.7474	21.3798		21.0462	20.9979	21.7729	22.0479	21.825				30.791		0	1	7.61117	8.4902				25	1	2	2	1	3	2	3	3	5	1
P63261;P60709;Q6S8J3;A5A3E0;P0CG38;Q9BYX7;P0CG39	P63261;P60709;Q6S8J3;A5A3E0	Homo sapiens		Actin, cytoplasmic 2;Actin, cytoplasmic 2, N-terminally processed;Actin, cytoplasmic 1;Actin, cytoplasmic 1, N-terminally processed;POTE ankyrin domain family member E;POTE ankyrin domain family member F	ACTG1;ACTB;POTEE;POTEF	20.3597	21.2471	21.3814	20.7414	21.783	22.1772	19.6257	20.4467	20.5291	21.5559	20.5772	22.1857	25.0359	25.2643	25.3811	24.8576	24.8433	24.9089	25.228	24.9628	25.1371	24.6431	24.8191	24.7129	41.792		0	1	8.77582	20.783				66	3	6	5	4	8	7	2	4	7	6
P61221	P61221	Homo sapiens		ATP-binding cassette sub-family E member 1	ABCE1					18.4818	17.4609												20.7553							67.314		0	1	7.21468	2.0887				2	0	0	0	0	2	0	0	0	0	0
P61970	P61970	Homo sapiens		Nuclear transport factor 2	NUTF2	19.2535	19.8026	19.8071	19.9472	20.5324	20.2949	19.6348	19.8747	20.2824	20.3291	19.5946	20.4033									22.6238				14.478		0	1	7.95289	3.8879				23	1	2	2	2	2	1	1	3	2	3
P61978	P61978	Homo sapiens		Heterogeneous nuclear ribonucleoprotein K	HNRNPK										15.9815		16.0246												19.1094	50.976		0	1	6.48021	2.581				1	0	0	0	0	0	0	0	0	0	0
P62826	P62826	Homo sapiens		GTP-binding nuclear protein Ran	RAN	18.0056	17.6507	18.02					18.1866	18.6682	18.0047		18.8832									21.6617				24.423		0	1	7.38306	2.7152				5	0	1	0	0	0	0	1	0	1	0
P62937	P62937	Homo sapiens		Peptidyl-prolyl cis-trans isomerase A;Peptidyl-prolyl cis-trans isomerase A, N-terminally processed	PPIA	20.6067	20.5082	20.3429	19.405	19.3095	19.5836	21.124	20.9768	21.7201				24.1488	24.3239	24.0854				24.2317	23.48	24.2463				18.012		0	1	8.15688	4.1784				9	1	0	1	0	1	0	2	2	2	0
P68133;P68032;P63267;P62736	P68133;P68032;P63267;P62736	Homo sapiens		Actin, alpha skeletal muscle;Actin, alpha cardiac muscle 1;Actin, gamma-enteric smooth muscle;Actin, aortic smooth muscle	ACTA1;ACTC1;ACTG2;ACTA2					18.2075												21.9106								42.051		0	1	6.78204	2.4426				4	0	0	1	0	1	1	0	1	0	0
P68871	P68871	Homo sapiens		Hemoglobin subunit beta;LVV-hemorphin-7;Spinorphin	HBB	33.0167	33.13	32.9382	32.846	33.2759	33.3436	32.9347	32.9643	33.2336	33.0943	33.3033	33.1377	36.6253	36.5978	36.4748	35.6496	35.9763	35.8352	36.3812	35.6918	36.2811	35.3924	35.4396	35.0059	15.998		0	1	12.0879	264.1				2274	215	160	205	131	157	197	163	165	220	122
P69892;P69891	P69892;P69891	Homo sapiens		Hemoglobin subunit gamma-2;Hemoglobin subunit gamma-1	HBG2;HBG1	19.532	17.9838	17.8305				20.0047	20.6132	18.2615	20.089	20.2034	18.4533							23.5404	23.48					16.126		0	1	7.88037	7.7576				10	1	0	1	0	0	0	1	2	0	3
PF3D7_1478600	PF3D7_1478600	Homo sapiens	EMP1-trafficking protein						21.7365	21.7708	21.8884				23.8385	22.6761	23.7182				27.2262	27.0813	26.8741				28.3704	27.8081	27.8385	143.85	1	1	0	9.39131	323.31				162	0	0	0	19	20	18	0	0	0	39
Q00013	Q00013	Homo sapiens		55 kDa erythrocyte membrane protein	MPP1				23.2821	23.3239	23.7182				23.1304	20.6406	23.48				27.3239	27.4707	27.0711				26.9428	25.5045	26.4362	52.296		0	1	9.15366	121.41				92	0	0	0	19	18	17	0	0	0	17
Q04656;P35670	Q04656	Homo sapiens		Copper-transporting ATPase 1	ATP7A				19.9977	19.6803	20.0969				20.1427	18.4078	19.9917				25.4707	24.9271	25.0813				24.7077	23.7077	23.9847	163.37		0	1	8.49298	65.325				56	0	0	0	8	8	15	0	0	0	11
Q08495	Q08495	Homo sapiens		Dematin	DMTN				28.3196	28.4976	28.7518				24.8528	23.7796	25.4583				32.3276	32.3033	32.4483				28.5934	28.0349	28.6216	45.514		0	1	10.4796	323.31				411	0	0	0	105	97	115	0	0	0	31
Q12959	Q12959	Homo sapiens		Disks large homolog 1	DLG1					15.7436	15.7706												20.0989							100.45		0	1	6.61261	2.6152				2	0	0	0	0	2	0	0	0	0	0
Q13442	Q13442	Homo sapiens		28 kDa heat- and acid-stable phosphoprotein	PDAP1					18.2575												20.4461								20.63		0	1	6.34116	2.7757				2	0	0	0	0	2	0	0	0	0	0
Q14254	Q14254	Homo sapiens		Flotillin-2	FLOT2				16.4441	16.4619	15.9298				15.9172		17.4099												20.6716	47.064		0	1	7.0943	4.342				5	0	0	0	1	0	2	0	0	0	1
Q14571	Q14571	Homo sapiens		Inositol 1,4,5-trisphosphate receptor type 2	ITPR2										21.8666	19.5815	21.4145												27.0813	308.06		0	1	9.00932	2.3336				2	0	0	0	0	0	0	0	0	0	1
Q14694	Q14694	Homo sapiens		Ubiquitin carboxyl-terminal hydrolase 10	USP10							16.1634	15.7367	17.2093												21.9528				87.133		0	1	7.01465	2.017				1	0	0	0	0	0	0	0	1	0	0
Q15223	Q15223	Homo sapiens		Nectin-1	PVRL1				17.0489	16.6684	17.3706				16.9583		17.0167												20.163	57.157		0	1	7.20575	34.455				7	0	0	0	1	2	1	0	0	0	1
Q5BKX8	Q5BKX8	Homo sapiens		Muscle-related coiled-coil protein	MURC	22.1347	22.2343	21.9708	21.3686	21.5424	22.4528	24.5983		25.3877						26.0084										41.899		0	1	9.17898	2.1718				2	0	0	1	0	0	1	0	0	0	0
Q5TDH0	Q5TDH0	Homo sapiens		Protein DDI1 homolog 2	DDI2							16.225	15.7081	16.0793												20.0057				44.522		0	1	6.62187	2.9222				3	0	0	0	0	0	0	1	0	2	0
Q6IAA8	Q6IAA8	Homo sapiens		Ragulator complex protein LAMTOR1	LAMTOR1				19.2099	19.5836					19.3647						21.8956	22.1367					21.5754			17.745		0	1	7.26961	3.369				6	0	0	0	2	2	0	0	0	0	2
Q6PJP8	Q6PJP8	Homo sapiens		DNA cross-link repair 1A protein	DCLRE1A							20.491	20.5284	20.8649	20.7843	20.1426	20.6342									25.9847				116.4		0	1	8.65835	2.4998				3	0	0	0	0	0	1	0	0	1	0
Q6Q759	Q6Q759	Homo sapiens		Sperm-associated antigen 17	SPAG17	17.6309	18.1904	15.4884	17.1227	18.4083								23.2492	25.3844											251.74		0	1	8.0251	3.4701				10	1	2	1	1	2	0	0	1	1	1
Q7Z401	Q7Z401	Homo sapiens		C-myc promoter-binding protein	DENND4A				15.0615	20.1371	20.1466		18.6149		17.0166	16.0078	16.8313					25.8788	25.867							209.24		0	1	8.43576	4.2495				11	0	1	1	0	0	3	2	1	0	1
Q86UP2	Q86UP2	Homo sapiens		Kinectin	KTN1	18.1313	19.269	18.7825	19.082	19.5161	19.6232									25.1946										156.27		0	1	8.46091	2.3623				4	1	1	0	0	1	1	0	0	0	0
Q8IU53	Q8IU53	Homo sapiens		Protein CASC2, isoforms 1/2	CASC2	21.0439	21.0234	22.1453												22.9357										8.6071		0	1	7.42807	2.8793				4	1	1	1	1	0	0	0	0	0	0
Q8IUE6;Q99878;Q96KK5;Q9BTM1;Q16777;Q93077;Q7L7L0;Q6FI13;P20671;P0C0S8;P04908;Q96QV6;P16104;REV__Q8NB25	Q8IUE6;Q99878;Q96KK5;Q9BTM1;Q16777;Q93077;Q7L7L0;Q6FI13;P20671;P0C0S8;P04908;Q96QV6;P16104	Homo sapiens		Histone H2A type 2-B;Histone H2A type 1-J;Histone H2A type 1-H;Histone H2A.J;Histone H2A type 2-C;Histone H2A type 1-C;Histone H2A type 3;Histone H2A type 2-A;Histone H2A type 1-D;Histone H2A type 1;Histone H2A type 1-B/E;Histone H2A type 1-A;Histone H2AX	HIST2H2AB;HIST1H2AJ;HIST1H2AH;H2AFJ;HIST2H2AC;HIST1H2AC;HIST3H2A;HIST2H2AA3;HIST1H2AD;HIST1H2AG;HIST1H2AB;HIST1H2AA;H2AFX	22.9753	23.1975	22.8418				23.1241	24.1719	23.7594		23.8858												25.4769		13.995		0	1	8.61831	3.2118				8	2	0	0	0	0	0	0	2	1	0
Q8IUW5	Q8IUW5	Homo sapiens		RELT-like protein 1	RELL1				20.3396	20.6543	20.5452				20.4753	21.4395	20.5797												21.7259	29.34		0	1	7.79418	5.4489				6	0	0	0	0	0	1	0	0	0	1
Q8IXW0	Q8IXW0	Homo sapiens		Lamin tail domain-containing protein 2	LMNTD2		19.2952		17.6803	18.2649		19.3008	20.6964	20.6513												24.9406				70.378		0	1	8.14404	2.0358				8	1	1	0	1	0	1	0	1	1	1
Q8IYE0	Q8IYE0	Homo sapiens		Coiled-coil domain-containing protein 146	CCDC146	15.9396	15.343	15.9062												21.5582										112.81		0	1	6.90984	2.294				2	1	0	0	0	0	0	0	0	0	0
Q8N4C6	Q8N4C6	Homo sapiens		Ninein	NIN								16.7151												22.8696					243.25		0	1	7.06915	1.9925				2	0	0	0	0	0	1	0	1	0	0
Q8NB25	Q8NB25	Homo sapiens		Protein FAM184A	FAM184A					15.3142			16.9574		15.6372							20.7829								132.96		0	1	7.17289	2.2509				0	0	0	0	0	0	0	0	0	0	0
Q8NHG7	Q8NHG7	Homo sapiens		Small VCP/p97-interacting protein	SVIP				20.5133	20.3354	20.9323												22.0512							8.4426		0	1	7.28517	1.9549				1	0	0	0	1	0	0	0	0	0	0
Q8TC07	Q8TC07	Homo sapiens		TBC1 domain family member 15	TBC1D15				17.5292	17.4265	17.5806	19.4991	19.031		18.8658		19.295						21.8694							79.49		0	1	8.02743	2.2817				4	0	0	0	1	1	1	0	0	0	1
Q8WZ42	Q8WZ42	Homo sapiens		Titin	TTN				9.55403	9.48631	9.61668	13.764	13.5955	14.4774												24.8717				3816		0	1	7.97917	2.2267				2	0	0	0	0	2	0	0	0	0	0
Q92736	Q92736	Homo sapiens		Ryanodine receptor 2	RYR2	14.337								14.0947	15.0051	14.8648										21.6894				564.56		0	1	7.43045	3.5197				3	1	0	0	0	0	0	0	0	1	0
Q96GI7	Q96GI7	Homo sapiens		Protein FAM89A	FAM89A	23.391	22.8262	15.0015	23.2535	23.2529	23.48				23.2821	23.867	24.1015			18.2085										19.569		0	1	8.92588	1.927				5	1	0	0	0	1	1	0	0	0	1
Q96PL5	Q96PL5	Homo sapiens		Erythroid membrane-associated protein	ERMAP				22.3666	22.2414	22.6454				22.4293	19.6983	22.5527				26.5255	26.3222	26.4008				26.067		25.7543	52.604		0	1	8.8689	25.54				22	0	0	0	3	4	5	0	0	0	3
Q96RT1	Q96RT1	Homo sapiens		Protein LAP2	ERBB2IP				17.7409	19.6314	18.5928				14.8692		15.1207				24.3376	24.9628	24.2463							158.3		0	1	8.0876	24.883				26	0	0	0	4	14	6	0	0	0	1
Q99469	Q99469	Homo sapiens		SH3 and cysteine-rich domain-containing protein	STAC				20.0722	19.5682	20.6256				16.3132								23.9134							44.553		0	1	7.9517	2.2091				10	0	0	0	4	2	3	0	0	0	1
Q9BTW9	Q9BTW9	Homo sapiens		Tubulin-specific chaperone D	TBCD		22.8085	19.5476	22.9872	22.8745	24.48	19.2479			22.76	14.2646				25.5404										132.6		0	1	9.53519	2.0458				5	0	0	1	0	2	0	1	0	0	1
Q9H095	Q9H095	Homo sapiens		IQ domain-containing protein G	IQCG										21.3897	20.6833	21.8479												24.9933	51.917		0	1	8.29433	2.1917				2	0	0	0	0	0	0	0	0	0	1
Q9H0G5	Q9H0G5	Homo sapiens		Nuclear speckle splicing regulatory protein 1	NSRP1	24.9716	30.7047	30.7613	30.7129	30.7771	30.8157	30.8157	30.6881	30.7129	30.5573	29.9677	30.5203									34.7454				66.389		0	1	11.6319	2.324				80	1	4	6	2	6	6	5	10	6	5
Q9H4G4	Q9H4G4	Homo sapiens		Golgi-associated plant pathogenesis-related protein 1	GLIPR2				18.6758	17.9883	18.3503				18.6085	17.0474	18.1642												19.7254	17.218		0	1	7.16835	2.1154				5	0	0	0	1	1	1	0	0	0	1
Q9H4M9	Q9H4M9	Homo sapiens		EH domain-containing protein 1	EHD1				17.9344	18.9439											22.5075	23.0606								60.626		0	1	7.34023	7.8778				10	0	0	0	3	7	0	0	0	0	0
Q9HCE1	Q9HCE1	Homo sapiens		Putative helicase MOV-10	MOV10			19.9866	18.6043			19.339	19.2588	19.4479												24.4041				113.67		0	1	8.27731	2.6593				6	0	0	3	1	0	0	0	1	1	0
Q9HCJ5	Q9HCJ5	Homo sapiens		Zinc finger SWIM domain-containing protein 6	ZSWIM6	20.7011	21.0793	20.978												26.5389										133.47		0	1	8.43987	2.4672				2	0	0	1	0	0	0	1	0	0	0
Q9HCS5	Q9HCS5	Homo sapiens		Band 4.1-like protein 4A	EPB41L4A							15.2593												19.7067						79.058		0	1	6.19557	1.9075				1	0	0	0	0	0	0	0	0	0	0
Q9NPD5	Q9NPD5	Homo sapiens		Solute carrier organic anion transporter family member 1B3	SLCO1B3	24.4614	24.391	24.48	24.3239	24.391	24.3443	24.4425	24.3778	20.9971	24.317	23.5522	24.0275	29.027	29.2847	29.3766				29.3848	28.4073					77.402		0	1	9.79243	2.8497				18	1	2	2	2	1	2	2	1	0	2
Q9NQ94	Q9NQ94	Homo sapiens		APOBEC1 complementation factor	A1CF				23.867	23.5754	24.2535		21.1834	21.8772	21.7505	18.3041	21.0795				28.0296		28.2262							65.202		0	1	9.20978	5.0057				6	1	0	0	1	0	1	1	0	1	1
Q9NRL2	Q9NRL2	Homo sapiens		Bromodomain adjacent to zinc finger domain protein 1A	BAZ1A				17.508	17.3015	17.9259												23.1532							178.7		0	1	7.61478	4.9438				5	0	0	1	1	1	2	0	0	0	0
Q9NRQ2	Q9NRQ2	Homo sapiens		Phospholipid scramblase 4	PLSCR4				17.7052		18.2993				17.9284		18.2799												20.3006	37.005		0	1	7.08436	2.1499				3	0	0	0	2	0	0	0	0	0	1
Q9NZW5	Q9NZW5	Homo sapiens		MAGUK p55 subfamily member 6	MPP6				14.9134	15.8718	15.8338												19.997							61.116		0	1	6.69237	2.1084				2	0	0	0	0	1	1	0	0	0	0
Q9UEY8	Q9UEY8	Homo sapiens		Gamma-adducin	ADD3				21.6298	22.4351	21.2072				19.9281	18.7514	20.3451				25.7569	25.9803	25.417				24.7234	24.4105	24.3239	79.154		0	1	8.59661	24.744				38	0	0	0	7	12	6	0	0	0	6
Q9UPE1;Q96SB4;P78362	Q9UPE1;Q96SB4;P78362	Homo sapiens		SRSF protein kinase 3;SRSF protein kinase 1;SRSF protein kinase 2;SRSF protein kinase 2 N-terminal;SRSF protein kinase 2 C-terminal	SRPK3;SRPK1;SRPK2				19.8481						20.5533	18.8052	20.7995										24.1015		23.9134	62.013		0	1	8.03985	2.2585				7	0	0	0	2	0	0	0	0	0	2
Q9UPX8	Q9UPX8	Homo sapiens		SH3 and multiple ankyrin repeat domains protein 2	SHANK2	14.9132	14.8702								16.0515												21.2469			158.82		0	1	6.96091	2.9835				3	2	0	0	0	0	0	0	0	0	1
Q9Y2K3	Q9Y2K3	Homo sapiens		Myosin-15	MYH15										16.8691												22.5872			224.62		0	1	7.08672	2.0132				2	1	0	0	0	0	0	0	0	0	1
Q9Y4A0	Q9Y4A0	Homo sapiens		Jerky protein homolog-like	JRKL				17.5676						20.4877	19.2836	20.3938												23.0094	59.911		0	1	7.96384	2.4148				4	0	0	0	1	0	0	0	0	0	1
Q9Y4D1;Q86T65	Q9Y4D1	Homo sapiens		Disheveled-associated activator of morphogenesis 1	DAAM1				14.8929	13.701					16.6796	14.4316	16.6237												21.0919	123.47		0	1	7.2124	4.1813				4	0	0	0	1	0	1	0	0	0	0
Q9Y6I4	Q9Y6I4	Homo sapiens		Ubiquitin carboxyl-terminal hydrolase 3	USP3	19.7025	19.6073	19.9689	19.4722	19.4635	19.899	19.7426	19.5017	19.7466	19.5394	19.3167	19.9475	24.6153	24.002	24.391				24.4298	23.895	23.7594				58.896		0	1	8.39929	2.3645				12	1	1	1	1	0	1	2	0	2	1
Q9Y6M5	Q9Y6M5	Homo sapiens		Zinc transporter 1	SLC30A1																									55.299		0	1	NaN	2.2112				2	0	0	0	2	0	0	0	0	0	0
P69905;P02008	P69905	P. falciparum 3D7		Hemoglobin subunit alpha	HBA1	32.3489	32.5179	31.9643	32.3672	32.7088	32.7533	32.5709	32.5038	33.2759	32.7006	32.6044	32.9117	35.4115	35.515	35.2408	34.6198	34.9063	34.684	35.581	34.7503	35.7047	34.3568	34.6629	34.2193	15.257		0	1	11.8065	323.31				1784	169	122	134	123	133	125	115	138	164	111
PF3D7_0102200	PF3D7_0102200	P. falciparum 3D7	ring-infected erythrocyte surface antigen						22.3039	22.173	22.7455				23.1722	21.2572	23.2257				26.9202	26.604	26.8142				27.0608	26.4692	26.8504	126.52	1	1	0	9.11926	44.607				84	0	0	0	15	9	18	0	0	0	20
PF3D7_0103200	PF3D7_0103200	P. falciparum 3D7	nucleoside transporter 4					18.3182	18.6278	18.6215	19.001	18.3333	19.4601	18.3944	19.3178	18.8164	19.6606									21.8353				50.01	0	1	0	7.87504	12.139				15	1	1	1	2	2	1	1	1	1	2
PF3D7_0104200	PF3D7_0104200	P. falciparum 3D7	StAR-related lipid transfer protein			15.3636	15.4819	14.9899	16.1425	15.8537	16.2902	14.9449	15.756	15.8086	18.514	17.9985	19.1901										21.8412	22.0558	22.0872	53.626	1	1	0	7.57561	10.907				12	1	1	0	1	1	1	0	2	0	2
PF3D7_0104800	PF3D7_0104800	P. falciparum 3D7	novel putative transporter 1, putative						17.6146	18.0031	18.7319	17.7295	17.3502	17.4514	17.9905	16.0277	18.666												21.5492	65.424	0	1	0	7.64455	2.7487				5	0	0	0	0	1	0	0	1	0	2
PF3D7_0106300	PF3D7_0106300	P. falciparum 3D7	calcium-transporting ATPase					14.7324	15.2605	15.5474	15.9234	15.1051	16.5192	15.8009	16.4798	17.6031	17.4736										21.6635	21.989	22.0103	139.41	0	1	0	7.62079	3.7051				10	0	0	1	1	1	0	1	1	1	1
PF3D7_0107500	PF3D7_0107500	P. falciparum 3D7	lipid/sterol:H+ symporter						17.4823	17.3516	17.3151				17.4101	14.2542	17.7756				22.6042	22.2727	22.2291				22.95		22.1294	170.3	0	1	0	7.73262	7.9528				16	0	0	0	3	5	2	0	0	0	3
PF3D7_0108300	PF3D7_0108300	P. falciparum 3D7	conserved Plasmodium protein, unknown function						14.6403	15.8735	17.9816	20.081	19.5377	20.9806	15.1016	16.1596	16.9369				24.0275	24.8764	24.8764	25.1984	24.7234	26.0401	24.3712	24.6703	25.1642	254.99	1	1	0	8.5894	16.499				23	0	0	1	1	2	6	1	0	6	1
PF3D7_0108500	PF3D7_0108500	P. falciparum 3D7	conserved Plasmodium protein, unknown function			21.4523	20.3819	20.9574		20.0768	20.6968	20.6425	23.1444	22.7283		22.392									23.5165	23.2254				19.734	1	1	0	7.81208	8.859				18	1	2	2	0	2	1	2	3	3	1
PF3D7_0109000	PF3D7_0109000	P. falciparum 3D7	photosensitized INA-labeled protein PHIL1, putative			17.5108	17.7364	17.6832	17.7475	18.2096	17.9206		16.7122							21.0423										25.477	0	1	0	7.17441	3.2603				7	1	1	1	1	1	1	0	1	0	0
PF3D7_0110600	PF3D7_0110600	P. falciparum 3D7	phosphatidylinositol-4-phosphate 5-kinase							14.1289	14.5817												20.1268							200.04	0	1	0	6.56222	2.5686				2	0	0	0	0	1	1	0	0	0	0
PF3D7_0111500	PF3D7_0111500	P. falciparum 3D7	UMP-CMP kinase, putative			13.8567	14.1392	13.9912	14.238		15.4259	14.7714	14.9312	15.3294												19.2558				44.244	0	1	0	6.65037	4.4684				5	0	0	1	0	0	2	1	1	0	0
PF3D7_0112200	PF3D7_0112200	P. falciparum 3D7	multidrug resistance-associated protein 1						14.5688	14.3021	15.5907				17.6439	16.3923	18.7376						23.2105				22.9797	22.7444	23.0784	214.44	1	1	0	7.90598	13.179				14	0	0	0	0	1	2	0	0	0	3
PF3D7_0113000	PF3D7_0113000	P. falciparum 3D7	glutamic acid-rich protein			22.1427	22.0019	21.5854	21.9198	22.4202	22.6631	23.0803	22.4374	22.4113	24.1871	22.3243	24.1015	26.2961	26.2317	25.9043	25.7771	26.1546	25.9825	27.0914	25.8528	26.019	27.2354	25.8166	26.632	79.794	1	1	0	9.25847	107.62				124	9	9	7	9	10	8	11	9	6	21
PF3D7_0113200	PF3D7_0113200	P. falciparum 3D7	Plasmodium exported protein, unknown function						21.7807	21.9547	22.3106				24.8997	23.5522	24.8717				26.5898	26.8504	26.7518				28.17	27.0401	27.6865	70.11	1	1	0	9.32094	271.92				85	0	0	0	10	10	9	0	0	0	21
PF3D7_0113700	PF3D7_0113700	P. falciparum 3D7	heat shock protein 40, type II						17.988	18.9485	19.5089				19.602	18.7425	19.7558					22.7114	22.3998				22.9705	21.9569	22.6437	46.988	1	1	0	7.81537	11.806				13	0	0	0	1	3	3	0	0	0	2
PF3D7_0114500	PF3D7_0114500	P. falciparum 3D7	Plasmodium exported protein (hyp10), unknown function			18.1475	18.7355	18.0765	18.9242	18.7823	19.4653	18.4047		18.5591	20.1857	19.2802	20.6137									21.0931				12.845	1	1	0	7.7383	2.4458				8	0	1	1	0	1	1	1	0	0	1
PF3D7_0201500	PF3D7_0201500	P. falciparum 3D7	Plasmodium exported protein (hyp9), unknown function						23.6431	23.2535	23.6096				25.7156	23.9672	25.7441				27.0084	26.391	26.6595				27.8916	26.1488	27.5165	29.623	1	1	0	9.25527	143.33				51	0	0	0	6	6	7	0	0	0	11
PF3D7_0201600	PF3D7_0201600	P. falciparum 3D7	PHISTb domain-containing RESA-like protein 1						16.3714	16.5785	16.2189				18.9182	18.2609	18.9592										22.3404	21.9561	22.1147	58.589	1	1	0	7.54054	5.5817				6	0	0	0	1	1	0	0	0	0	1
PF3D7_0201800	PF3D7_0201800	P. falciparum 3D7	knob associated heat shock protein 40						19.8503	21.7921	19.3596				21.2904	20.1571	20.8047				24.918	24.9316	24.1488				24.5463	23.9225	24.2021	48.282	1	1	0	8.449	27.622				26	0	0	0	4	5	4	0	0	0	6
PF3D7_0201900	PF3D7_0201900	P. falciparum 3D7	erythrocyte membrane protein 3			15.2639	13.6632	15.5723	20.6364	20.8456	19.5717	16.1273	15.2055	15.1292	21.2304	20.8421	21.7211	21.9731		22.364	26.6998	26.5195	26.1642	23.391	21.3192	21.3792	27.6389	27.3325	27.7645	273.64	1	1	0	9.22791	115.21				132	1	1	1	12	17	12	4	1	2	25
PF3D7_0202000	PF3D7_0202000	P. falciparum 3D7	knob-associated histidine-rich protein			25.0317	25.0772	25.0935	26.8142	26.9202	26.9977	26.0127	24.2821	24.5463	27.8385	26.976	27.611	29.114	29.6181	29.8474	30.0608	29.8579	29.7895	30.6198	27.4394	27.9814	30.4234	29.9677	29.6948	71.302	1	1	0	10.325	215.57				590	34	35	37	45	49	53	54	22	27	70
PF3D7_0202200	PF3D7_0202200	P. falciparum 3D7	EMP1-trafficking protein			16.7897	15.9223	16.2201	16.8838	16.882	17.526				18.6019	17.7313	18.6489										21.4595		21.0113	33.741	1	1	0	7.37878	5.572				5	1	1	0	0	0	1	0	0	0	1
PF3D7_0202400	PF3D7_0202400	P. falciparum 3D7	gamete antigen 27/25, putative						16.1257	15.6663	16.1846				21.2574	20.0474	21.4677				21.0263	20.5705	20.802				26.3376	23.4425	25.9043	141.85	1	1	0	8.55772	81.276				47	0	0	0	2	2	1	0	0	0	21
PF3D7_0203400	PF3D7_0203400	P. falciparum 3D7	conserved Plasmodium protein, unknown function										16.007												17.3934					9.8306	0	1	0	5.42065	3.0204				2	0	0	0	0	0	0	0	1	1	0
PF3D7_0204500	PF3D7_0204500	P. falciparum 3D7	aspartate transaminase													16.1227	16.0122												19.1584	47.005	0	1	0	6.51836	2.4132				1	0	0	0	0	0	0	0	0	0	0
PF3D7_0204700	PF3D7_0204700	P. falciparum 3D7	hexose transporter			18.4882	18.2651	18.3113	18.7113	18.9435	19.1852				18.5816	18.5919	19.0149			22.5184										56.416	0	1	0	7.84125	2.1058				6	1	0	1	1	1	1	0	0	0	1
PF3D7_0206800	PF3D7_0206800	P. falciparum 3D7	merozoite surface protein 2			22.9011	22.3448	22.5306	22.1274	22.2591	22.3619	22.0812	23.1287	22.549	22.547	24.141	22.9189	26.3612	25.965	25.9338	25.5344	25.5165	25.5404	25.6068	26.0484	25.5841	25.0935	26.9202	25.0359	27.957	0	1	0	9.01607	63.67				100	10	11	8	4	5	8	5	10	9	7
PF3D7_0207500	PF3D7_0207500	P. falciparum 3D7	serine repeat antigen 6										16.102	15.9331		14.8382	14.9921								21.3378	21.2305				118.83	0	1	0	7.03775	6.2235				6	0	0	1	0	0	0	0	0	3	0
PF3D7_0207600	PF3D7_0207600	P. falciparum 3D7	serine repeat antigen 5			21.432	21.1995	21.599	21.8502	21.4961	22.2523	22.2684	23.2492	22.9142	22.0618	22.7333	23.2245	27.3578	27.217	27.4314	26.9869	26.8264	27.0711	27.5463	27.9428	27.8142	26.7518	27.9372	27.2803	111.77	0	1	0	9.49791	153.28				245	18	16	18	14	18	21	18	29	27	16
PF3D7_0207700	PF3D7_0207700	P. falciparum 3D7	serine repeat antigen 4					13.0298			14.5947	15.2961	16.2039	16.5739		17.1507	16.5011							21.563	21.7755	21.4134		21.8905	21.2973	108.68	0	1	0	7.43359	12.703				14	0	0	2	0	0	1	1	3	3	0
PF3D7_0207800	PF3D7_0207800	P. falciparum 3D7	serine repeat antigen 3			14.6243	14.5096	14.3869	14.2625	14.3395	15.0814	14.0652	15.3469	14.7917	14.7609	14.7866	16.2357												20.5519	105.42	0	1	0	7.29519	5.9733				16	0	2	1	2	2	2	0	1	1	0
PF3D7_0208400	PF3D7_0208400	P. falciparum 3D7	conserved Plasmodium protein, unknown function												13.6658												19.2506			241.79	0	1	0	6.08228	2.1803				2	0	0	0	0	0	0	0	0	0	1
PF3D7_0209800	PF3D7_0209800	P. falciparum 3D7	ATP-dependent RNA helicase UAP56			17.6912	17.3982	18.3035	17.1496	17.184	17.9214	17.7871	18.123	18.7692	18.7071	17.9739	20.3732			22.8575							22.3464		23.1328	52.223	0	1	0	7.95085	10.705				19	2	1	2	1	2	1	0	1	2	2
PF3D7_0210900	PF3D7_0210900	P. falciparum 3D7	conserved Plasmodium protein, unknown function			19.0599	18.5814	19.0376		19.1983	19.2509	19.6261	19.4255	19.1994												21.5408				32.541	0	1	0	7.52793	6.9824				10	1	1	1	0	2	1	1	0	1	1
PF3D7_0211800	PF3D7_0211800	P. falciparum 3D7	asparagine--tRNA ligase			16.4816	16.0535	17.0344				16.9355	16.9778	18.0343	15.1995		16.6273			21.9297										70.497	0	1	0	7.44262	4.9221				6	0	1	2	0	0	0	1	0	1	0
PF3D7_0212300	PF3D7_0212300	P. falciparum 3D7	peptide chain release factor subunit 1, putative			16.4335	14.6051	16.289				16.3893	16.7239	16.6058						21.081										48.063	0	1	0	7.11916	2.6031				2	1	0	0	0	0	0	0	1	0	0
PF3D7_0212400	PF3D7_0212400	P. falciparum 3D7	conserved Plasmodium membrane protein, unknown function			19.6292	19.9942	19.784	16.9724		17.6099									27.4938										494.21	0	1	0	8.79912	2.2875				2	1	0	0	0	0	1	0	0	0	0
PF3D7_0214100	PF3D7_0214100	P. falciparum 3D7	protein transport protein SEC31					13.638	14.6913	15.0284	15.3649	14.0632	14.5146	14.9024												20.3672				166.71	1	1	0	7.05477	4.1619				8	0	0	1	1	1	1	0	2	1	0
PF3D7_0214600	PF3D7_0214600	P. falciparum 3D7	serine/threonine protein kinase, putative							16.4962	13.344		12.0444	13.9175			13.8969									19.3524				204.29	0	1	0	7.02003	3.5542				6	0	0	0	0	0	1	0	0	2	0
PF3D7_0215300	PF3D7_0215300	P. falciparum 3D7	acyl-CoA synthetase														14.3987												18.2079	102.66	0	1	0	5.91421	2.5256				2	0	0	0	0	0	0	0	0	0	1
PF3D7_0216400	PF3D7_0216400	P. falciparum 3D7	vacuolar protein sorting-associated protein 45, putative									18.6572	18.5633	19.1294	21.6671	21.1944	22.4803												25.3645	86.255	0	1	0	8.71451	2.7482				2	0	0	0	0	0	0	0	0	0	0
PF3D7_0217800	PF3D7_0217800	P. falciparum 3D7	40S ribosomal protein S26			20.7937	21.5434	20.1308	20.5094			20.3871	21.1276	20.5087	21.9465	22.0511	22.3564	22.9578	24.0935								23.1968	23.7389	23.1617	12.508	0	1	0	8.121	2.3913				11	1	2	1	1	0	0	1	1	1	0
PF3D7_0219600	PF3D7_0219600	P. falciparum 3D7	replication factor C subunit 1, putative																											104.18	0	1	0	NaN	1.998				1	0	0	0	0	0	0	0	0	0	0
PF3D7_0220100	PF3D7_0220100	P. falciparum 3D7	DnaJ protein, putative						19.4792	19.551	19.7039				20.4988	19.4235	20.5359				24.7077	24.6595	24.48				25.1565	24.3376	24.7645	117.29	1	1	0	8.4899	23.944				41	0	0	0	8	8	7	0	0	0	7
PF3D7_0220500;PF3D7_0221700	PF3D7_0220500;PF3D7_0221700	P. falciparum 3D7	Plasmodium exported protein (hyp2), unknown function;Plasmodium exported protein, unknown function						22.183	21.9784	22.7388			21.9548									25.4425							33.01	1	1	0	8.37931	2.42				2	0	0	0	0	0	1	0	0	1	0
PF3D7_0220600	PF3D7_0220600	P. falciparum 3D7	Plasmodium exported protein (hyp9), unknown function						20.9035	20.5974	20.916				23.114	22.0855	23.5404				24.002	23.6865	24.1253				25.4298	23.6649	25.48	25.881	1	1	0	8.49527	7.9196				14	0	0	0	1	0	2	0	0	0	5
PF3D7_0220800	PF3D7_0220800	P. falciparum 3D7	cytoadherence linked asexual protein 2												17.7357	16.3002	18.8508										23.0454	22.7524	23.0655	171.16	0	1	0	7.75079	12.955				16	0	0	0	2	0	0	0	0	0	5
PF3D7_0221200	PF3D7_0221200	P. falciparum 3D7	Plasmodium exported protein (hyp15), unknown function														22.1982												24.5696	24.621	1	1	0	7.82844	1.9853				3	0	0	0	1	0	0	0	0	0	0
PF3D7_0301600	PF3D7_0301600	P. falciparum 3D7	Plasmodium exported protein (hyp1), unknown function						16.3115	15.8746	16.1718				19.8318	18.1896	19.5784				22.0324	21.6098	21.5056				23.8481	22.859	22.964	87.507	1	1	0	7.92814	11.648				13	0	0	0	0	1	2	0	0	0	5
PF3D7_0302500;PF3D7_0302200	PF3D7_0302500;PF3D7_0302200	P. falciparum 3D7	cytoadherence linked asexual protein 3.1;cytoadherence linked asexual protein 3.2			19.4817	18.5262	19.4181	21.5033	21.7603	22.0422	17.9995	20.0409	20.0811	23.417	22.2308	24.0275	26.1154	24.9361	26.0691	27.2445	27.4394	27.5014	24.895	26.3811	26.3118	28.6931	27.3325	28.5278	167.24	1	1	0	9.55981	217.53				235	7	2	6	26	27	21	5	9	15	46
PF3D7_0302900	PF3D7_0302900	P. falciparum 3D7	exportin-1, putative				12.3427	12.9217				12.5341	14.6669	14.475	14.2254		15.4236								20.0904	20.2298	19.579		20.2189	147.94	0	1	0	6.97984	2.7988				6	0	1	0	0	0	0	0	1	2	0
PF3D7_0304200	PF3D7_0304200	P. falciparum 3D7	EH domain-containing protein						17.2527	17.6878	17.1998				14.4829	14.576	14.6146				21.9986	21.9762	21.6364							61.292	0	1	0	7.31511	5.1648				8	0	0	0	3	3	1	0	0	0	1
PF3D7_0304400	PF3D7_0304400	P. falciparum 3D7	60S ribosomal protein L44			21.9194	22.0929	21.5986	20.5555	20.0258	21.3584	20.6678	21.0254	21.0214	20.8251	19.1134	21.8141	22.9678	23.1672											12.157	0	1	0	7.76273	2.5876				7	2	0	0	0	1	1	0	0	1	1
PF3D7_0305600	PF3D7_0305600	P. falciparum 3D7	AP endonuclease (DNA-[apurinic or apyrimidinic site] lyase), putative			13.9187	14.4378	14.9654				15.6364		15.9746										20.8011		20.5232				72.442	0	1	0	6.78568	4.8025				6	0	0	1	0	1	0	1	0	3	0
PF3D7_0305700	PF3D7_0305700	P. falciparum 3D7	ubiquitin-conjugating enzyme E2, putative			19.8085	19.6301	20.3284	19.6485	18.9022	19.4959	19.9288	19.7937	19.8784	20.001	20.2798	20.2958									22.4124				16.14	0	1	0	7.96671	4.601				24	2	2	3	2	2	2	2	2	2	2
PF3D7_0306200	PF3D7_0306200	P. falciparum 3D7	activator of Hsp90 ATPase						15.4373	15.8205	15.8073												19.248							41.59	0	1	0	6.50401	2.0794				2	0	0	0	0	0	1	0	0	0	0
PF3D7_0306300	PF3D7_0306300	P. falciparum 3D7	glutaredoxin 1			21.9397	22.2276	22.376	22.1756	22.252	22.358	22.1908	22.9074	22.6551	22.4786	21.479	23.1864	24.4676	24.7695	24.8811	24.417	24.2961	24.3239	24.8336	24.7024	24.7543	23.9584		24.1795	12.418	0	1	0	8.60459	9.6337				44	2	4	4	3	3	3	4	6	5	3
PF3D7_0306800	PF3D7_0306800	P. falciparum 3D7	T-complex protein 1 subunit beta						15.2851	15.5546	16.2264	15.457	17.0038	16.8752	17.5792	16.2329	18.711								21.7747	21.8485	21.2889	21.0267	21.6338	59.198	0	1	0	7.57083	7.3033				9	0	0	0	0	1	0	0	2	1	1
PF3D7_0307100	PF3D7_0307100	P. falciparum 3D7	40S ribosomal protein S12, putative			17.4435	19.9598	20.8737	20.7686	20.4442	20.4454	19.2375	21.412	22.1962	19.559	21.2542	22.4078		23.5404	24.1015	23.8191	23.2451		24.1642	24.1795	24.8044	23.6431	24.2961	23.4425	15.396	0	1	0	8.43605	9.8649				24	1	1	2	1	3	1	2	2	2	3
PF3D7_0307200	PF3D7_0307200	P. falciparum 3D7	60S ribosomal protein L7, putative			21.7453	21.8433	22.0427	22.0165	22.3096	22.5333	22.2374	22.5825	23.0603	21.8469	22.1889	22.7686	25.4073	25.4266	25.6568	24.6486	24.7995	24.824	25.7569	25.2354	25.5285	24.3101	24.5983	24.7389	30.523	0	1	0	8.79782	18.732				71	4	7	4	5	5	7	5	9	9	5
PF3D7_0307900	PF3D7_0307900	P. falciparum 3D7	conserved Plasmodium protein, unknown function								16.5925				14.5259		15.5355												21.6203	448.2	0	1	0	7.49503	3.2725				3	0	0	0	0	0	1	0	0	0	0
PF3D7_0308100	PF3D7_0308100	P. falciparum 3D7	zinc finger protein, putative			16.7249		15.6146	17.6279		16.1935	16.9353		17.1978												23.3778				202.14	0	1	0	7.85227	1.9646				4	1	0	0	1	0	1	0	0	1	0
PF3D7_0308200	PF3D7_0308200	P. falciparum 3D7	T-complex protein 1 subunit eta			15.9389	15.885	16.1132	16.1738	16.5004	16.9762	16.1125	16.9223	16.987	16.5859		17.4919									21.2759				59.577	0	1	0	7.47175	3.8603				9	0	1	1	1	1	1	1	1	1	0
PF3D7_0309200	PF3D7_0309200	P. falciparum 3D7	serine/threonine protein kinase, putative							17.5589						14.445	15.2951					23.4425								193.78	0	1	0	7.36661	1.9438				2	0	0	0	0	1	0	0	0	0	0
PF3D7_0309600	PF3D7_0309600	P. falciparum 3D7	60S acidic ribosomal protein P2			25.6811	25.8576	26.53	25.8069	25.9316	25.9225	26.4846	26.7518	26.3376	26.0254	26.1965	26.0464	27.9031	28.2714	28.7549	27.6798	27.3578	27.5165	28.8504	28.3109	28.1214	27.4394	27.7958	27.1115	11.948	1	1	0	9.65515	323.31				80	5	4	9	5	6	7	9	7	6	7
PF3D7_0310300	PF3D7_0310300	P. falciparum 3D7	phosphoglycerate mutase, putative												18.2532												23.1318			138.31	0	1	0	7.25064	1.9394				2	0	0	0	0	0	0	0	0	0	2
PF3D7_0310400	PF3D7_0310400	P. falciparum 3D7	parasite-infected erythrocyte surface protein										16.8137	16.2928	15.3035		15.5763								22.0119	21.6865				154.09	1	1	0	7.21037	7.9053				5	0	0	0	0	0	0	0	2	0	0
PF3D7_0311900	PF3D7_0311900	P. falciparum 3D7	conserved Plasmodium protein, unknown function								21.7882												26.1927							92.358	0	1	0	8.14996	2.1709				1	0	0	0	0	0	1	0	0	0	0
PF3D7_0312800	PF3D7_0312800	P. falciparum 3D7	60S ribosomal protein L26, putative			22.5627	22.6764	22.8582	22.88	23.0665	23.3376	23.6971	23.5045	23.7286	23.3101	21.6616	23.9672							25.1642	24.5696	24.7389	24.2096		24.3645	14.812	0	1	0	8.54597	6.0021				16	2	1	1	1	1	1	1	1	2	1
PF3D7_0316300;PF3D7_0316300.2-p1	PF3D7_0316300;PF3D7_0316300.2-p1	P. falciparum 3D7	inorganic pyrophosphatase, putative					18.3492					16.7534	15.7342			15.9141								20.3877					45.231	0	1	0	7.02747	3.4267				4	0	0	1	0	0	0	0	2	0	0
PF3D7_0316700	PF3D7_0316700	P. falciparum 3D7	protein YOP1, putative			21.3318	20.8737	20.9478	19.2724	20.6906	20.2087	21.4509	20.7075	21.3198	20.6242	17.6699	21.5039	24.6431	24.317	24.3307	23.391	23.4923	23.7895	24.5344	24.1174	24.1488	23.1138		23.4425	26.04	0	1	0	8.38609	11.046				35	3	4	2	3	3	2	4	2	4	5
PF3D7_0316800	PF3D7_0316800	P. falciparum 3D7	40S ribosomal protein S15A, putative			20.2884	20.4968	20.6853	20.6244	21.1011	21.5478	20.2521	21.0263	21.4361	20.8326	18.4176	22.0999	23.5285	23.7995	23.895	23.2678	23.4923	23.417	23.5404	23.5404	23.7389	22.9993		22.9811	14.873	0	1	0	8.28892	16.027				25	0	2	1	3	3	3	0	3	2	4
PF3D7_0317000	PF3D7_0317000	P. falciparum 3D7	proteasome subunit alpha type-3, putative			18.24	18.0502		17.8413	18.2465	18.4256	18.2949	18.8375	18.7564	18.1034		18.2207									22.1973				29.289	0	1	0	7.69446	2.1756				8	0	1	0	1	1	2	0	0	1	1
PF3D7_0317300	PF3D7_0317300	P. falciparum 3D7	conserved Plasmodium protein, unknown function									13.1373		13.8437	19.1841	19.5246	13.7685										26.0772	25.3205		402.95	0	1	0	8.31252	3.6798				5	0	1	0	0	0	0	1	0	1	1
PF3D7_0317600	PF3D7_0317600	P. falciparum 3D7	40S ribosomal protein S11, putative			20.7646	20.8482	21.2514	20.8492	20.6631	21.2706	21.3942	21.7466	21.7282	21.2998	21.1683	22.372	24.2244	24.4298	24.7746				24.945	24.5522	24.7234				18.76	0	1	0	8.5514	17.297				31	3	2	3	1	2	3	3	3	3	2
PF3D7_0319400	PF3D7_0319400	P. falciparum 3D7	kinesin-8, putative			15.6072	15.5476	16.1271							16.5128	15.3399	17.112												21.6732	157.39	0	1	0	7.45553	1.9611				4	0	1	0	0	1	0	0	0	0	1
PF3D7_0319600	PF3D7_0319600	P. falciparum 3D7	elongation factor 1-delta, putative			22.8993	23.632	23.7895	23.4923	23.7594	23.6649	23.9933	23.9847	23.5522	24.0772	22.9211	24.5522	25.604	26.604	26.7129	25.8599	26.0854	25.632	26.8741	26.1174	25.8264	25.7796	25.2463	25.726	17.706	0	1	0	9.07631	12.917				36	3	4	2	2	3	4	1	4	1	4
PF3D7_0320300	PF3D7_0320300	P. falciparum 3D7	T-complex protein 1 subunit epsilon									14.902	17.55	17.4052											21.9788	21.8957				59.175	0	1	0	7.10295	2.4724				2	0	0	0	0	0	0	0	1	1	0
PF3D7_0320900	PF3D7_0320900	P. falciparum 3D7	histone H2A.Z			24.1642	23.7895	24.0935	17.9825	18.5231	19.4581	18.8041	25.9157	22.0702		22.656	25.0975								26.976	25.792		26.433	26.4234	16.453	0	1	0	8.99083	10.872				28	2	0	1	0	3	1	1	5	4	0
PF3D7_0322000	PF3D7_0322000	P. falciparum 3D7	peptidyl-prolyl cis-trans isomerase			23.5165	23.4551	24.1795	23.7594	23.7492	24.1015	24.1642	24.3975	24.239	23.9933	22.5516	24.1642	26.452	26.4362	26.9428	25.9628	25.8599	26.1214	27.019	26.5344	26.5344	25.6431	25.6264	25.3342	18.952	1	1	0	9.12659	8.6348				26	2	2	1	1	2	2	2	5	2	3
PF3D7_0322900	PF3D7_0322900	P. falciparum 3D7	40S ribosomal protein S3A, putative			20.5867	20.7614	20.9057	20.2234	20.7996	21.2578	20.5187	21.7774	22.0438	21.3334	20.816	22.0999	24.7846	25.0975	24.7695	24.2244	24.2021	24.275	24.48	24.9539	25.3135	23.9134	23.6209	24.417	30.047	0	1	0	8.64262	16.294				52	3	3	5	4	3	4	1	8	7	7
PF3D7_0401800	PF3D7_0401800	P. falciparum 3D7	Plasmodium exported protein (PHISTb), unknown function			21.2007	21.5365	22.464	23.1032	23.3101	23.7182	23.1303	19.9563	21.9838	24.3645	22.253	24.2535	26.5638	26.9316	27.3828	27.2262	27.4629	27.5014	28.0296	25.2317	26.3256	28.1361	26.9316	27.4551	60.269	1	1	0	9.48541	270.66				169	12	11	14	9	15	20	21	4	14	17
PF3D7_0402000	PF3D7_0402000	P. falciparum 3D7	Plasmodium exported protein (PHISTa), unknown function						22.7389	22.61	22.6576				24.9584	24.558	25.2856				26.2856	26.1055	25.7466				27.7518	27.3494	27.3828	49.743	1	1	0	9.27683	67.659				89	0	0	0	10	9	6	0	0	0	21
PF3D7_0402100	PF3D7_0402100	P. falciparum 3D7	Plasmodium exported protein (PHISTb), unknown function						21.9973	21.3782	22.5812				23.4923	21.7825	23.7389				25.9825	25.5285	26.1984				26.5478	25.3844	26.518	67.787	1	1	0	8.92968	18.48				46	0	0	0	4	4	6	0	0	0	8
PF3D7_0402400	PF3D7_0402400	P. falciparum 3D7	Plasmodium exported protein, unknown function						20.8703	20.5097	20.727	16.3082	17.2209	17.8035	23.3101	22.2007	23.5638				23.976	23.3778	23.417	22.5277		21.9775	25.8312	25.2571	25.3342	31.019	1	1	0	8.60095	40.982				35	0	0	0	3	4	3	0	1	1	8
PF3D7_0403400	PF3D7_0403400	P. falciparum 3D7	conserved Plasmodium protein, unknown function												19.0303	17.2051												24.0854		460.08	0	1	0	8.12892	2.269				3	0	0	1	0	0	0	1	0	0	1
PF3D7_0404900	PF3D7_0404900	P. falciparum 3D7	6-cysteine protein										17.0994	18.0957	17.1025	16.1513	18.9298									22.0433			21.8597	43.088	0	1	0	7.37661	4.0454				7	0	0	0	0	0	0	0	2	3	0
PF3D7_0406100	PF3D7_0406100	P. falciparum 3D7	V-type proton ATPase subunit B							16.3499	17.6298		18.142				17.3987								22.1722					55.788	0	1	0	7.27207	2.4865				6	0	0	0	0	0	1	0	2	1	0
PF3D7_0406200	PF3D7_0406200	P. falciparum 3D7	sexual stage-specific protein precursor											20.5224			20.6496									22.3783				16.626	0	1	0	7.19742	4.0654				5	0	0	0	0	0	1	1	0	2	0
PF3D7_0406400	PF3D7_0406400	P. falciparum 3D7	cytosolic glyoxalase II			16.8644	16.8919	17.0309	16.7895	17.0242	17.4908									21.0681										30.528	0	1	0	7.11025	5.109				4	0	1	1	1	1	0	0	0	0	0
PF3D7_0407800	PF3D7_0407800	P. falciparum 3D7	conserved Plasmodium protein, unknown function			14.7584	14.4778	14.1724	14.2444	14.445	13.325	14.0095	14.7156	15.3292	18.3265	16.7937	18.3236										23.4425	23.48	22.957	230.12	0	1	0	7.92894	23.458				31	0	2	1	1	0	2	3	2	1	6
PF3D7_0409300	PF3D7_0409300	P. falciparum 3D7	conserved Plasmodium protein, unknown function								17.3355												21.9779							120.66	0	1	0	6.88126	3.2957				1	0	0	0	0	0	1	0	0	0	0
PF3D7_0413900	PF3D7_0413900	P. falciparum 3D7	ubiquitin carboxyl-terminal hydrolase 13, putative			13.7218							13.9013	14.3447												19.2007				98.47	0	1	0	6.29769	2.124				2	1	0	0	0	0	0	0	0	1	0
PF3D7_0415900	PF3D7_0415900	P. falciparum 3D7	60S ribosomal protein L15, putative			18.1317	18.9757	19.1112		19.5424	20.4498	21.3665	21.2035	21.9333	21.2673		21.2667							24.9225	23.6431	24.3511				24.134	0	1	0	8.20309	4.3697				20	2	1	2	1	2	2	2	2	3	2
PF3D7_0416800	PF3D7_0416800	P. falciparum 3D7	small GTP-binding protein sar1				17.6551	17.1934	18.3455	18.5431	18.9389	18.5709	19.4637	20.081	18.0456	19.982	19.82							22.3175	22.391	23.4298				22.02	1	1	0	7.89405	6.6662				8	0	0	1	0	1	0	1	0	2	0
PF3D7_0417200	PF3D7_0417200	P. falciparum 3D7	bifunctional dihydrofolate reductase-thymidylate synthase						15.167	15.3431	15.0783	14.4054	15.6868	15.468	15.4358	15.9256	15.9948									19.909				71.736	0	1	0	7.08415	3.2895				4	0	0	0	1	1	0	0	0	1	0
PF3D7_0419600	PF3D7_0419600	P. falciparum 3D7	ran-specific GTPase-activating protein 1, putative			18.6514	18.7153	18.7463	18.6566	19.0065	19.1991	18.614	19.4348	19.3854	18.9901	20.6046	19.3922	22.4604	22.581	22.5391	22.0283	22.083	22.1843	22.5248	22.6058	22.6978	21.6598	23.2499	21.5151	33.195	0	1	0	7.98444	65.312				20	2	3	1	0	2	1	1	1	3	1
PF3D7_0422400	PF3D7_0422400	P. falciparum 3D7	40S ribosomal protein S19			22.5458	22.5463	22.4144	22.6327	23.391	22.4364	22.5792	23.2961	23.7077	22.9891	23.5404	23.3778	25.9316	25.9606	25.8741	25.2678	25.6891	25.2499	26.0443	25.8788	25.9406	25.065	25.8142	25.1174	19.722	0	1	0	8.96614	34.405				96	6	6	7	9	9	8	7	9	9	9
PF3D7_0423300	PF3D7_0423300	P. falciparum 3D7	conserved Plasmodium protein, unknown function			18.7244	19.6025	19.8398	19.1142	19.4762	19.7635	18.7076	19.2002	19.3175	19.7418	17.7736	20.0458	23.2359	23.9225	23.9847	23.2113	23.4551	23.4923	23.5638	23.2387	23.2325	23.6865		23.3101	58.35	0	1	0	8.27667	32.241				59	3	10	7	5	3	5	6	7	3	3
PF3D7_0423500	PF3D7_0423500	P. falciparum 3D7	glideosome associated protein with multiple membrane spans 2					21.2223		21.2157	20.1065					21.4654	21.7325					23.1818								42.618	0	1	0	7.87125	4.9225				10	0	0	3	0	2	1	0	1	1	0
PF3D7_0424400	PF3D7_0424400	P. falciparum 3D7	surface-associated interspersed protein 4.2 (SURFIN 4.2)												16.7826	16.3076	17.0299												22.5101	286.41	1	1	0	7.59823	1.9156				1	0	0	0	0	0	0	0	0	0	1
PF3D7_0424500	PF3D7_0424500	P. falciparum 3D7	serine/threonine protein kinase, FIKK family						25.1833	25.2821	25.5404				25.4583	24.7594	25.7645				29.8682	29.6948	29.7613				29.4234	28.6389	29.2216	74.442	1	1	0	9.94511	166.19				181	0	0	0	29	31	26	0	0	0	29
PF3D7_0424600	PF3D7_0424600	P. falciparum 3D7	Plasmodium exported protein (PHISTb), unknown function						22.0292	22.1788	21.7637	18.4903	18.7187	18.8931	16.2566						25.3612	25.341	24.7129							35.961	1	1	0	8.29079	7.5858				13	0	0	0	5	5	1	0	0	1	1
PF3D7_0500800	PF3D7_0500800	P. falciparum 3D7	mature parasite-infected erythrocyte surface antigen			19.4777	20.8859	20.7302	25.654	25.6431	25.7364	21.4006	20.6162	20.7683	27.9869	27.5536	28.0711	25.6209	27.1015	26.7895	30.9677	30.8459	30.5389	27.3662	26.038	26.3342	32.9295	32.3956	32.4359	168.29	1	1	0	10.7335	323.31				1483	7	24	23	137	133	122	28	14	16	287
PF3D7_0501000	PF3D7_0501000	P. falciparum 3D7	Plasmodium exported protein, unknown function			18.798	19.0466	19.0456	20.0714	20.3406	20.6969	19.5363	20.092	19.8346	19.7729		20.4291	23.2215	23.5045	23.5165	22.9304	23.074	23.2421	23.3239	23.1131	23.0785			22.9227	30.715	1	1	0	8.17909	4.8011				19	1	1	2	4	1	3	1	2	1	2
PF3D7_0501200	PF3D7_0501200	P. falciparum 3D7	parasite-infected erythrocyte surface protein						18.2142	18.0467	18.1986		18.4413	18.1313	21.1327	20.5013	22.0653				22.0644	21.8557	21.6719		22.3849	21.8104	24.5404	23.8191	24.558	48.72	1	1	0	8.24162	18.393				30	0	0	0	1	2	1	0	2	2	8
PF3D7_0501300	PF3D7_0501300	P. falciparum 3D7	skeleton-binding protein 1										19.0642	18.7634	21.394	21.8244	22.0878											23.9043		36.298	1	1	0	7.92137	14.088				3	0	0	0	0	0	0	0	1	0	0
PF3D7_0501600	PF3D7_0501600	P. falciparum 3D7	rhoptry-associated protein 2			19.0705	18.4333	18.8394	19.803	19.9845	20.5143	18.2599	20.5855	20.5979	20.0908	20.9866	21.4286	23.6096	23.0328	23.5754	23.48	23.7796	23.9225	23.3645	24.2021	24.3712	23.3376	24.217	24.2961	46.738	0	1	0	8.45682	14.057				48	4	1	3	5	4	5	1	7	5	3
PF3D7_0503400	PF3D7_0503400	P. falciparum 3D7	actin-depolymerizing factor 1			25.3778	26.8623	26.3811	26.3084	26.3612	26.512	26.518	25.5105	26.0935	26.5898	25.3205	27.217	28.3066	29.6747	29.2308	28.6424	28.726	28.4823	29.3196	27.7833	28.3992	28.4591	27.4234	28.6146	13.741	0	1	0	9.85889	86.516				37	1	5	4	3	4	3	3	2	4	3
PF3D7_0503800	PF3D7_0503800	P. falciparum 3D7	60S ribosomal protein L31			20.1848	21.0239	21.6292	21.1729	21.0365	21.614	21.6929	21.8169	21.9796	21.6471	19.7787	22.2775		23.1936	23.5754			22.8001	23.8481	22.9252	23.5754	22.5142		22.7945	14.065	0	1	0	8.14339	5.2773				23	1	2	3	1	1	2	3	3	2	3
PF3D7_0505700	PF3D7_0505700	P. falciparum 3D7	conserved Plasmodium membrane protein, unknown function														14.8219												18.8751	112.7	0	1	0	6.11504	2.8288				2	0	0	0	1	0	0	0	0	0	0
PF3D7_0505800	PF3D7_0505800	P. falciparum 3D7	small ubiquitin-related modifier			17.8285	18.0829	18.2218	18.8577	18.1691	18.6405	19.4295	19.8702	19.6453	18.0442	19.4043	18.6463							21.8977	21.9099	21.7521		21.5034		11.06	0	1	0	7.54557	3.5285				9	0	0	1	1	2	0	0	2	0	1
PF3D7_0506500	PF3D7_0506500	P. falciparum 3D7	conserved Plasmodium protein, unknown function												12.6467		12.0153												18.0844	469.87	0	1	0	6.28341	2.086				2	0	0	0	0	0	0	0	0	0	1
PF3D7_0506900	PF3D7_0506900	P. falciparum 3D7	rhomboid protease ROM4												17.1839		19.1478										22.1995		22.5745	86.653	0	1	0	7.44297	4.9712				3	0	0	0	0	0	0	0	0	0	1
PF3D7_0507100	PF3D7_0507100	P. falciparum 3D7	60S ribosomal protein L4			20.1257	19.1557	18.904	19.6431	19.903	20.0423	19.8915	21.2369	20.5958	20.0869	20.792	21.3277	24.7846	24.1015	23.9847	23.6209	23.8481	23.6096	24.0772	24.5522	24.2021	23.417	24.1871	23.7695	46.211	0	1	0	8.49658	36.779				44	1	3	4	2	2	2	4	8	4	3
PF3D7_0508500	PF3D7_0508500	P. falciparum 3D7	guanidine nucleotide exchange factor					13.5767							15.0653	15.197												21.2978		304.12	0	1	0	6.98152	2.7998				1	1	0	0	0	0	0	0	0	0	0
PF3D7_0508900	PF3D7_0508900	P. falciparum 3D7	conserved Plasmodium protein, unknown function						16.6419		16.9749	11.565	11.6951	12.2197	16.0509	16.2939	17.6448												23.3778	370.18	0	1	0	7.93314	3.677				8	0	0	0	1	0	1	0	1	0	2
PF3D7_0511000	PF3D7_0511000	P. falciparum 3D7	translationally-controlled tumor protein homolog									20.4534	21.3677	20.8354	21.2227	20.9095	21.3388							23.0973	23.3239	23.0146				19.979	0	1	0	7.89481	2.9299				3	0	0	0	0	0	0	0	2	0	0
PF3D7_0511500	PF3D7_0511500	P. falciparum 3D7	RNA pseudouridylate synthase, putative			17.6441	17.685	17.6163	17.7673	17.6036	17.752	17.56	17.5956	17.2979	18.3889	18.416	18.5153							26.5404		25.4234				1187.6	0	1	0	9.14507	7.6046				32	4	3	3	3	2	2	5	1	2	2
PF3D7_0511800	PF3D7_0511800	P. falciparum 3D7	inositol-3-phosphate synthase			18.9054	18.8526	19.9421	17.9687	18.3257	18.0185	18.7332	19.7991	20.3248	19.5034	16.297	20.4473	24.0526	24.1095	24.1015	23.7182	23.9584	23.4298	24.317	24.275	24.4551	23.5045		23.9495	69.111	0	1	0	8.42005	27.485				50	2	4	5	2	2	5	6	6	7	4
PF3D7_0512600	PF3D7_0512600	P. falciparum 3D7	ras-related protein Rab-1B										15.2666		16.9058		17.8346								18.6529					22.886	1	1	0	6.80177	2.1702				2	0	0	0	0	0	0	0	1	0	0
PF3D7_0513200	PF3D7_0513200	P. falciparum 3D7	conserved Plasmodium protein, unknown function						15.5978	15.0785	14.8369	18.6458	18.3131	18.6638									21.1749							332.13	0	1	0	8.27515	2.0885				1	0	0	0	0	0	1	0	0	0	0
PF3D7_0513300	PF3D7_0513300	P. falciparum 3D7	purine nucleoside phosphorylase			18.7788	18.7675	18.5953		19.2904	19.8744	19.3222	19.5381		19.7692	19.4079	19.7133			22.2175										26.858	0	1	0	7.90913	2.6701				6	1	0	0	0	0	1	0	2	0	1
PF3D7_0513600	PF3D7_0513600	P. falciparum 3D7	deoxyribodipyrimidine photo-lyase, putative					16.318				13.4086		13.9858			14.3024			22.2859										129.2	0	1	0	6.89591	4.096				4	0	0	1	0	0	0	0	0	1	0
PF3D7_0515000	PF3D7_0515000	P. falciparum 3D7	pre-mRNA-splicing factor CWC2, putative			23.8481	23.6865	23.3511										28.7676	28.5898											98.381	0	1	0	9.05664	1.9935				2	1	1	0	0	0	0	0	0	0	0
PF3D7_0516200;P62263	PF3D7_0516200	P. falciparum 3D7	40S ribosomal protein S11			18.7184	17.8661	19.0945		18.2398	19.5762	18.9135	22.3119	21.4036	19.8274	21.8451	22.0582							22.1462	24.0443	23.8288	21.7993	23.5983	23.0459	16.076	0	1	1	8.07613	10.459				21	1	1	1	0	1	1	1	4	5	1
PF3D7_0516900	PF3D7_0516900	P. falciparum 3D7	60S ribosomal protein L2			17.8046	17.7245	17.7354	17.311	18.2155	18.2151	17.8546	18.9854	18.5486	18.2973	18.5119	19.42									21.5421				27.999	0	1	0	7.64039	3.3678				10	0	1	1	1	1	1	1	0	1	1
PF3D7_0517000	PF3D7_0517000	P. falciparum 3D7	60S ribosomal protein L12, putative			18.7677	18.6638	18.9924	21.4851	21.7001	22.0232	22.2479	22.5649	22.9658	22.5821	22.4899	22.9388				24.4041	24.5463	24.558	25.6891	25.0691	25.6891	24.1871	24.7441	24.417	18.112	0	1	0	8.66668	18.123				32	1	1	1	2	5	3	1	4	3	2
PF3D7_0517300	PF3D7_0517300	P. falciparum 3D7	serine/arginine-rich splicing factor 1			20.1085	20.6643	20.486	20.3655	20.071	21.3131	20.8989	21.421	21.8291	20.9581	17.9145	21.0501	24.0359	24.5045	24.317	24.4362	24.2317	24.2317	24.3712	24.4614	24.6096	23.9672		23.6649	34.561	0	1	0	8.49371	24.337				30	3	3	3	1	2	4	2	4	3	2
PF3D7_0517400	PF3D7_0517400	P. falciparum 3D7	FACT complex subunit SPT16, putative			13.7727	13.6081	13.9475				14.2095	15.4241	14.6947												19.9292				132.68	0	1	0	6.83563	3.3192				6	0	0	1	0	0	0	1	3	1	0
PF3D7_0517700	PF3D7_0517700	P. falciparum 3D7	eukaryotic translation initiation factor 3 subunit B, putative									14.9614	16.854	16.1709	15.0903	15.3659	17.1389								21.3706	20.8346			20.8279	84.056	0	1	0	7.19299	4.3678				6	0	0	0	0	0	0	0	3	1	0
PF3D7_0518200	PF3D7_0518200	P. falciparum 3D7	SWIB/MDM2 domain-containing protein			17.5069	18.0279	18.2596				16.7736	18.2862	17.6865	17.1381	17.8656	18.0172									20.0278				15.496	0	1	0	7.1586	2.4099				6	0	0	1	0	0	0	0	1	1	1
PF3D7_0518300	PF3D7_0518300	P. falciparum 3D7	proteasome subunit beta type-1, putative			17.438	17.3346	17.3743	17.8114	18.1212	18.237	17.7636	18.0854	18.4966	18.3572	19.7051	19.0074										21.7514	22.5058	21.8376	27.268	0	1	0	7.76992	5.2311				13	1	1	1	0	1	1	1	1	1	1
PF3D7_0518700	PF3D7_0518700	P. falciparum 3D7	mRNA-binding protein PUF1													19.0459	15.6821											24.9271		224.08	0	1	0	7.76488	1.91				1	0	0	0	0	0	0	0	0	0	0
PF3D7_0519400	PF3D7_0519400	P. falciparum 3D7	40S ribosomal protein S24			17.9601	17.8697	17.9216	20.0227	18.9604	20.4728	20.5812	20.5447	21.0051	18.2788	19.3375					22.2915		22.2107	23.0559	22.557	23.1978				15.391	0	1	0	7.77627	5.7714				16	1	1	1	2	0	1	3	2	2	1
PF3D7_0519700	PF3D7_0519700	P. falciparum 3D7	FoP domain-containing protein, putative									17.2104	18.1817	14.7845		17.7983								20.1734	20.949					22.734	0	1	0	6.80251	3.286				3	0	0	0	0	0	0	0	2	0	0
PF3D7_0520000	PF3D7_0520000	P. falciparum 3D7	40S ribosomal protein S9, putative			17.3922	17.0708	17.7157	17.9776	18.4413	20.2634	19.8191	21.4235	21.4031	19.1386		21.3398						22.8715	22.7686	23.5045	23.6971			23.48	22.123	0	1	0	7.98729	14.467				19	1	0	1	1	1	2	0	3	4	3
PF3D7_0520600	PF3D7_0520600	P. falciparum 3D7	bis(5'-nucleosyl)-tetraphosphatase [asymmetrical]				16.5583	16.5174	18.4204	18.7044	19.0593	18.4982	18.0084	19.3417	18.6744	17.0755	18.9737				21.0357	21.1108	21.1729			21.7353	20.8311		20.5751	17.75	1	1	0	7.4924	3.9597				14	0	1	0	2	2	1	1	2	2	2
PF3D7_0520900	PF3D7_0520900	P. falciparum 3D7	adenosylhomocysteinase			20.2913	20.4064	20.9656	21.3153	21.412	21.8383	20.7406	21.8176	21.6668	21.5326	21.3076	22.4859	25.0567	25.2058	25.632	25.2961	25.2678	25.4362	24.8623	25.1604	25.3477	24.7338	24.5344	25.1214	53.838	1	1	0	8.83443	57.73				36	2	1	3	3	2	2	3	4	3	2
PF3D7_0521300	PF3D7_0521300	P. falciparum 3D7	conserved Plasmodium protein, unknown function			17.4943	17.279	17.7775							18.857	16.9725	17.8689										23.8764			161.9	0	1	0	7.9489	2.5684				2	0	0	0	0	0	0	0	0	0	1
PF3D7_0523000	PF3D7_0523000	P. falciparum 3D7	multidrug resistance protein 1					16.2992	20.1809	20.4548	20.699	16.739	17.9116	17.4072	18.3424	16.8168	19.2869			22.8601	25.3645	25.6431	25.4488	23.1677	23.6096	23.3101	23.6431	23.0592	24.0105	162.25	0	1	0	8.55818	38.536				66	0	0	2	14	15	11	4	5	3	3
PF3D7_0524000	PF3D7_0524000	P. falciparum 3D7	karyopherin beta			16.5954	16.2732	13.5564	18.4433	18.6217	18.8384	16.7136	18.7953	18.7719	18.724	18.1494	19.5184	23.1303	22.876		24.0105	24.0608	23.976	23.3645	23.9134	24.1488	23.7286	23.7077	23.9043	127.35	0	1	0	8.411	19.442				47	1	2	2	5	8	2	1	4	6	5
PF3D7_0524500	PF3D7_0524500	P. falciparum 3D7	conserved Plasmodium protein, unknown function				17.4797	18.0011				16.7798		17.3826					20.7534	20.9096										14.505	0	1	0	6.76553	2.919				3	0	1	1	0	0	0	1	0	0	0
PF3D7_0525100	PF3D7_0525100	P. falciparum 3D7	acyl-CoA synthetase			16.2634	17.2622	16.1729	15.829	16.2619	16.8777		17.5246	18.4948	18.2369	17.931	18.9085		22.2898						22.1905	22.76		22.4725	22.2077	76.851	1	1	0	7.82898	9.5923				13	1	1	0	1	0	1	0	2	2	1
PF3D7_0525800	PF3D7_0525800	P. falciparum 3D7	inner membrane complex protein 1g, putative			18.861	19.7716	19.7338	19.7167	19.8771	20.3469	19.0359	19.5005	19.4057	19.2398	18.9229	20.2496		23.6865	23.5869	23.0409	23.0343	23.2821	22.9456	22.7261	22.7582	22.1129	21.7631	22.559	34.34	0	1	0	8.13459	2.9409				21	1	2	2	2	2	2	2	2	2	2
PF3D7_0526900	PF3D7_0526900	P. falciparum 3D7	transmembrane emp24 domain-containing protein, putative			15.8834	16.4122		17.0191	17.1603			17.3393	17.3006	17.2003		17.8316									20.2941				24.561	0	1	0	7.09757	4.4337				10	1	1	0	1	1	1	0	2	1	1
PF3D7_0527100	PF3D7_0527100	P. falciparum 3D7	ubiquitin-conjugating enzyme E2 N, putative														19.2329												20.9641	17.411	0	1	0	6.74392	7.0119				1	0	0	0	0	0	0	0	0	0	0
PF3D7_0527500	PF3D7_0527500	P. falciparum 3D7	Hsc70-interacting protein			17.6981	17.5664	17.5356				20.182	20.9086	20.3597		19.0929	21.3047							24.3239	24.1719	23.9933			23.8481	51.125	0	1	0	8.12057	75.627				13	0	0	1	0	0	0	3	3	1	2
PF3D7_0528200	PF3D7_0528200	P. falciparum 3D7	eukaryotic translation initiation factor 3 subunit E, putative									14.5851	15.6718	15.9165			16.8771												20.2457	61.418	0	1	0	6.86046	2.1926				2	0	0	0	0	0	0	0	1	0	0
PF3D7_0529400.2-p1;PF3D7_0529400	PF3D7_0529400.2-p1;PF3D7_0529400	P. falciparum 3D7	conserved Plasmodium protein, unknown function												16.3862												21.6413			176.4		1	0	6.80195	2.0631				1	0	0	0	0	0	0	0	0	1	0
PF3D7_0532100	PF3D7_0532100	P. falciparum 3D7	early transcribed membrane protein 5			23.9495	23.417	23.9134	23.7492	23.3511	23.9584	23.5404	24.4234	23.976	23.7895	25.4892	24.1871	25.9825	25.5551	25.8069	25.3975	24.7024	25.0732	25.5926	25.945	25.48	24.8481	26.6998	24.7945	19.03	0	1	0	8.93659	149.58				47	4	2	4	4	2	5	4	4	4	5
PF3D7_0532300	PF3D7_0532300	P. falciparum 3D7	Plasmodium exported protein (PHISTb), unknown function			18.3423	14.5435	17.7942	27.5754	27.5389	27.8019	18.538	20.3065	19.9178	29.6198	28.7518	29.8385	22.0532		21.6362	31.8497	31.5664	31.7292		23.1329	22.7848	33.4334	32.2675	33.2619	60.188	1	1	0	10.9048	323.31				585	1	0	1	53	46	54	1	3	4	94
PF3D7_0532400	PF3D7_0532400	P. falciparum 3D7	lysine-rich membrane-associated PHISTb protein			21.4105	21.8566	22.56	24.7338	24.6376	24.9043	23.4676	20.9034	21.78	25.965	25.0732	25.9517	26.3443	26.6181	27.1214	28.673	28.5203	28.4976	28.3066	25.4138	26.067	29.3282	28.4976	28.9567	61.086	1	1	0	9.81031	323.31				258	11	7	12	28	18	24	22	6	9	44
PF3D7_0601900	PF3D7_0601900	P. falciparum 3D7	conserved Plasmodium protein, unknown function			17.646	17.0514	17.7851	18.6536	18.5599	18.4559	17.6019	19.5092	19.1529	19.1647	19.7102	19.6366									20.4885				14.725	1	1	0	7.34351	6.0954				14	1	0	2	1	1	1	1	2	1	1
PF3D7_0602200	PF3D7_0602200	P. falciparum 3D7	MYND-type zinc finger protein, putative									15.5097	16.0526	15.8243	15.928	16.8751	16.2475									19.1657				29.441	0	1	0	6.78261	2.9317				3	0	0	0	0	0	0	0	1	1	0
PF3D7_0605600	PF3D7_0605600	P. falciparum 3D7	nucleoside diphosphate kinase, putative									14.9893	15.2682	15.8178												21.9367				219.87	0	1	0	7.09538	1.9595				2	0	0	0	0	0	0	0	1	0	0
PF3D7_0605800	PF3D7_0605800	P. falciparum 3D7	DNA repair protein RAD50, putative			17.0768	19.5013	19.5908	18.9564	16.5466	19.5447	17.5644	17.1959	17.5027	21.1934	20.9179	22.0567		26.5609	27.4234	26.2002		26.3975						25.9293	267.95	0	1	0	9.19407	2.2226				10	1	0	2	1	1	1	0	0	1	1
PF3D7_0607000	PF3D7_0607000	P. falciparum 3D7	translation initiation factor IF-2, putative						15.2805	15.7759	15.6727	14.5448	15.1853	15.8668			15.596				20.477	20.6615								112.36	0	1	0	7.18446	10.291				10	0	1	0	1	1	0	1	2	2	0
PF3D7_0608500	PF3D7_0608500	P. falciparum 3D7	proteasome subunit alpha type-2, putative			16.7704	16.854	17.2756				17.3083	17.921	17.9845	17.7626	18.2882	18.9353											21.3634		26.528	0	1	0	7.46886	2.71				5	1	0	0	0	0	0	1	0	1	0
PF3D7_0610400;Q6NXT2;Q71DI3;Q16695;P84243;P68431	PF3D7_0610400	P. falciparum 3D7	histone H3			24.4738	20.9703	24.7389	24.7645	24.7077	25.317	24.3712	24.9271	24.7895	25.6486	25.2021	26.4041	26.5448	26.0526	26.673	26.604	26.217	26.2002	26.5105	26.4908	26.2481	26.1984	26.4645	26.2891	15.446	0	1	1	9.21877	13.681				38	3	0	3	3	4	5	3	3	3	5
PF3D7_0611600	PF3D7_0611600	P. falciparum 3D7	conserved Plasmodium protein, unknown function														17.6039												20.8657	76.663	0	1	0	6.71429	3.9138				2	0	0	0	0	0	0	0	0	0	0
PF3D7_0612200	PF3D7_0612200	P. falciparum 3D7	leucine-rich repeat protein												11.3265	12.0147	10.8976												15.8339	220.29	0	1	0	5.85428	2.4973				2	0	0	0	0	0	0	0	1	0	0
PF3D7_0613800	PF3D7_0613800	P. falciparum 3D7	AP2 domain transcription factor, putative																											485.58	0	1	0	NaN	2.4194				2	0	0	1	0	0	0	1	0	0	0
PF3D7_0614300	PF3D7_0614300	P. falciparum 3D7	major facilitator superfamily-related transporter, putative						19.4976	19.4494	19.6624				19.835	19.4211	20.1626				23.9043	23.7594	23.9225				24.0105	24.0105	23.8093	96.979	0	1	0	8.2388	17.286				35	0	0	0	8	6	3	0	0	0	7
PF3D7_0614500	PF3D7_0614500	P. falciparum 3D7	60S ribosomal protein L19			21.0171	21.2647	21.6633	21.4905	21.3692	21.2167	21.3132	22.1632	21.8326	21.6484	21.412	22.3899	23.9043	24.1174	24.3239	23.2441	23.0314	23.2022	24.317	24.2021	23.7182	23.2821	22.7076	23.3101	21.58	0	1	0	8.36547	50.056				29	3	1	1	3	4	2	2	2	4	1
PF3D7_0614900	PF3D7_0614900	P. falciparum 3D7	conserved Plasmodium membrane protein, unknown function						18.0654						16.0244	15.8613	16.6595				22.9373									130.93	0	1	0	7.31524	2.699				1	0	0	0	1	0	0	0	0	0	0
PF3D7_0617200	PF3D7_0617200	P. falciparum 3D7	conserved Plasmodium protein, unknown function			16.7323	16.0949	17.3778	18.4015	17.9053	18.8567	18.7446	19.4966	19.3832	17.9578	17.684	19.3684	22.5585		21.9713	22.2739	21.7708	22.6428	22.8106	23.0417	23.0305	21.9531	22.1554	22.2851	52.98	0	1	0	7.98788	10.934				19	1	0	4	1	1	2	2	2	3	0
PF3D7_0617800	PF3D7_0617800	P. falciparum 3D7	histone H2A			23.1793	22.6975	22.7971	23.3778	23.5869	23.632	22.8413	24.8191	24.0359	23.6209	19.2214	25.4457										25.2961		26.8741	14.122	0	1	0	9.08411	2.101				13	1	1	1	1	1	1	1	2	1	1
PF3D7_0617900	PF3D7_0617900	P. falciparum 3D7	histone H3 variant			21.6903	21.7038	21.5176				17.7024	19.4398	19.0877	20.8817	22.0543	21.5295										22.041	23.2364	22.178	15.441	0	1	0	7.91589	3.5174				9	1	1	1	0	0	0	1	1	1	0
PF3D7_0618300	PF3D7_0618300	P. falciparum 3D7	60S ribosomal protein L27a, putative			19.4611	20.0819	20.1514	20.5596	20.4468	20.8755	21.1117	21.4757	21.9533	20.8828	19.1954	21.4361	22.9569	23.4923	23.632	22.9952	22.5798	23.0151				22.973	22.0647	23.0774	16.722	0	1	0	8.3066	10.718				25	1	3	3	2	1	3	1	1	4	3
PF3D7_0618500	PF3D7_0618500	P. falciparum 3D7	malate dehydrogenase																											34.04	0	1	0	NaN	2.7354				1	0	0	0	0	0	0	0	0	0	0
PF3D7_0619400	PF3D7_0619400	P. falciparum 3D7	cell division cycle protein 48 homologue, putative			16.7048	16.3416	16.5013	14.5232	15.5553	14.9037	15.2788	16.9289	16.4333	14.7225	14.8313	17.9647	21.7884	21.3868	21.7425		21.1123		21.707	22.4093	22.1465		21.905	20.9916	92.386	0	1	0	7.68528	45.516				25	2	2	4	0	2	0	2	4	3	1
PF3D7_0619700	PF3D7_0619700	P. falciparum 3D7	conserved Plasmodium protein, unknown function												17.5847		18.6429										22.0224		21.8645	76.558	0	1	0	7.28756	5.673				4	0	0	0	0	0	0	0	0	0	2
PF3D7_0621200	PF3D7_0621200	P. falciparum 3D7	pyridoxine biosynthesis protein PDX1									17.9939	18.7535	19.1959		17.0439	17.0679												19.6292	33.013	0	1	0	7.40168	6.3896				4	0	0	0	0	0	0	1	0	1	0
PF3D7_0621700	PF3D7_0621700	P. falciparum 3D7	conserved Plasmodium protein, unknown function			17.9249	17.8433	18.0929	17.8037	19.2198	19.1393									24.6703										192.02	0	1	0	8.30703	2.6008				4	1	0	0	0	1	1	1	0	0	0
PF3D7_0621800	PF3D7_0621800	P. falciparum 3D7	nascent polypeptide-associated complex subunit alpha, putative			18.8838	18.9833	19.1346	18.9743	20.0548		20.1802	20.9373	21.3188	18.9904	21.3329	21.7572					22.9791		23.7995	23.7796	23.7077		24.2021	23.3239	20.623	0	1	0	8.1959	10.993				18	0	0	1	0	3	1	1	3	2	2
PF3D7_0623400	PF3D7_0623400	P. falciparum 3D7	MEI2-like RNA-binding protein, putative										14.2101	13.7693												17.7627				49.93	0	1	0	5.85982	2.0209				3	0	0	0	1	0	0	0	1	0	0
PF3D7_0624000	PF3D7_0624000	P. falciparum 3D7	hexokinase										16.4735		16.8698	17.2192	18.2123										20.6836		21.5211	55.261	1	1	0	7.25551	7.0191				7	0	0	1	0	0	0	0	2	0	0
PF3D7_0624600	PF3D7_0624600	P. falciparum 3D7	SNF2 helicase, putative									12.1223	12.848	12.5164		12.4064	13.6328									19.0504				315.62	0	1	0	6.66135	2.1296				2	0	0	0	0	0	0	0	1	1	0
PF3D7_0626700	PF3D7_0626700	P. falciparum 3D7	conserved protein, unknown function							16.9394	16.7305		17.147	17.2211	17.2986		18.4455									21.0031				43.649	0	1	0	7.30016	2.0599				7	0	0	0	0	2	0	0	1	1	1
PF3D7_0626800	PF3D7_0626800	P. falciparum 3D7	pyruvate kinase			21.1198	21.437	21.6351	21.9174	22.0862	22.5477	21.7614	22.1077	22.4856	22.2333	21.9031	23.417	26.2335	26.2856	26.4877	26.17	26.0588	26.3595	26.7389	26.5029	26.9869	26.0105	25.7945	26.5045	55.66	0	1	0	9.20262	42.123				141	11	11	13	15	10	13	13	11	7	10
PF3D7_0627500	PF3D7_0627500	P. falciparum 3D7	protein DJ-1			20.9972	19.6401	20.812	20.3368	20.7145	20.8193	19.5185	20.1965	20.5411	19.932	20.3498	20.713	23.6971	23.5045	23.6209	23.024	23.0891	22.8331	23.8191	23.895	23.8288	22.9668	23.5165	23.2019	20.292	0	1	0	8.27642	10.684				40	5	4	2	3	4	3	4	3	4	2
PF3D7_0628100	PF3D7_0628100	P. falciparum 3D7	HECT-domain (ubiquitin-transferase), putative						15.2109	17.9724	15.3205				16.3505	17.3997	17.5676					26.1371								1206	0	1	0	8.61434	2.6761				12	0	0	0	2	2	1	0	0	1	2
PF3D7_0628900	PF3D7_0628900	P. falciparum 3D7	RAP protein, putative												13.5627		13.2103												17.9614	174.75	0	1	0	6.19734	2.5898				3	0	0	0	0	0	0	0	0	0	0
PF3D7_0629200	PF3D7_0629200	P. falciparum 3D7	DnaJ protein, putative									15.2804	16.3026	16.2907			16.5806												19.6013	44.669	0	1	0	6.8178	2.4464				2	0	0	0	0	0	0	0	0	1	0
PF3D7_0629500	PF3D7_0629500	P. falciparum 3D7	amino acid transporter, putative			16.2042	16.1529	16.0275	16.9488	16.6949	16.896		16.9362	16.2906												20.0726				68.858	0	1	0	7.1682	2.0283				7	1	1	1	0	0	1	1	1	1	0
PF3D7_0702000	PF3D7_0702000	P. falciparum 3D7	Plasmodium exported protein (hyp12), unknown function														18.3875												20.4082	28.825	1	1	0	6.57658	2.1857				3	0	0	0	0	0	0	0	0	0	0
PF3D7_0702400	PF3D7_0702400	P. falciparum 3D7	small exported membrane protein 1						17.6148	17.2489	17.5349	19.3387	20.6375	18.0272	20.4839	21.3985	21.0638							22.4302	23.3778	20.6025	22.4084	23.2162	22.9612	14.195	1	1	0	7.88221	3.7511				9	0	0	0	1	0	1	0	2	0	2
PF3D7_0702500	PF3D7_0702500	P. falciparum 3D7	Plasmodium exported protein, unknown function			16.761	16.0321	16.8482	21.1656	21.3201	22.0912	16.078	18.0718	17.5941	22.936	22.5295	23.3376				25.4394	24.275	24.5638				25.1795	25.6568	24.7695	27.673	1	1	0	8.62244	87.771				54	1	0	1	6	4	11	1	1	1	10
PF3D7_0703500	PF3D7_0703500	P. falciparum 3D7	erythrocyte membrane-associated antigen				12.3159	12.8859	13.3727	16.1796	15.6082	13.3387	13.312	14.2467	15.2194	13.8147	16.5526						20.9559	20.8479		21.2225	20.9326	20.8802	21.2358	264.91	0	1	0	7.56786	16.534				20	0	1	0	1	2	4	1	1	1	2
PF3D7_0704100	PF3D7_0704100	P. falciparum 3D7	conserved Plasmodium membrane protein, unknown function				12.4697	11.6906			13.6633	12.3204		13.0278	15.1807		15.2436										21.5254		21.4032	425.26	0	1	0	7.28475	7.4207				10	0	1	0	0	0	1	0	0	1	4
PF3D7_0704300	PF3D7_0704300	P. falciparum 3D7	conserved Plasmodium membrane protein, unknown function				19.1956	19.9333	18.7023	18.5054	18.8015		14.1594	15.1429	20.7601	19.3109	21.2235				24.7441	24.5696	24.9847			22.3103	26.1585	25.1449	26.0464	217.49	0	1	0	8.84558	93.798				97	0	0	1	9	7	11	0	1	1	23
PF3D7_0705500	PF3D7_0705500	P. falciparum 3D7	inositol-phosphate phosphatase, putative			17.6666	17.5466	17.4812	17.9441	17.828	18.148				19.025	17.369	18.6289				24.2021	23.3645	23.6431				25.5195	24.6376	24.7338	330.7	0	1	0	8.54731	46.53				40	0	1	0	4	2	2	0	0	0	13
PF3D7_0706000	PF3D7_0706000	P. falciparum 3D7	importin-7, putative			15.8921	15.4904	16.1131	16.9512	14.8195	17.1208	16.1316	16.5097	16.4757	17.041	15.7357	18.0134	21.853	21.7091	22.0716				22.1026	21.934	22.0194				145.51	0	1	0	7.87347	5.1354				11	2	1	1	1	1	1	0	0	1	1
PF3D7_0706500	PF3D7_0706500	P. falciparum 3D7	conserved Plasmodium protein, unknown function												14.7281	14.2625	16.6457												21.2069	196.57	0	1	0	6.9803	2.1714				3	0	0	0	0	0	0	0	0	0	1
PF3D7_0708400;P08238;P07900	PF3D7_0708400	P. falciparum 3D7	heat shock protein 90			21.7074	21.2036	21.7699	21.3592	21.7274	22.4082	22.2994	23.5869	23.9495	22.4522	22.747	23.867	27.2077	27.0296	27.2262	26.6458	26.8973	27.1312	27.4938	27.9869	28.267	26.5653	27.1214	27.4473	86.165	0	1	1	9.49962	137.19				218	14	11	17	11	11	16	13	28	34	14
PF3D7_0708800	PF3D7_0708800	P. falciparum 3D7	heat shock protein 110			18.8821	18.3194	18.5841	18.3986	18.4668	18.7722	18.6702	19.8074	19.4743	18.8001	19.4174	19.8424	24.1174	23.8858	23.9495	23.6096	23.6096	23.5983	23.8858	24.632	24.3778	23.5165	24.6865	24.0772	99.963	0	1	0	8.4769	87.289				64	6	4	7	3	3	5	7	6	7	5
PF3D7_0710200	PF3D7_0710200	P. falciparum 3D7	conserved Plasmodium protein, unknown function								14.5625	16.9498	16.994	16.8326										24.3778	23.8191	23.7077				350.7	0	1	0	7.8174	3.7819				6	0	0	0	0	0	1	1	2	2	0
PF3D7_0714000	PF3D7_0714000	P. falciparum 3D7	histone H2B variant			16.7634	15.6382	15.8157	16.4234	22.197	22.1087	21.9914	22.8425	22.4779	16.3337	20.5656	23.4551					23.7492	23.6865	24.3307	25.792	24.0359		24.3844	24.558	13.763	0	1	0	8.45036	16.011				9	1	0	0	1	1	0	0	2	0	0
PF3D7_0715200	PF3D7_0715200	P. falciparum 3D7	conserved Plasmodium protein, unknown function								13.6405												19.4736							258.4	0	1	0	6.1274	2.2755				4	0	0	0	0	1	1	0	0	0	0
PF3D7_0716800	PF3D7_0716800	P. falciparum 3D7	eukaryotic translation initiation factor 3 subunit I, putative			16.0054		16.5486				16.7334	16.9602	17.0488	15.6997	16.2717	18.4703												21.2795	37.284	0	1	0	7.29126	13.051				10	2	0	1	0	0	0	1	2	1	1
PF3D7_0717300	PF3D7_0717300	P. falciparum 3D7	transcription initiation factor IIE subunit alpha, putative			18.8733	18.0224	18.3821												22.5067										46.825	0	1	0	7.2671	2.035				2	1	0	0	0	0	0	0	0	0	0
PF3D7_0717700	PF3D7_0717700	P. falciparum 3D7	serine--tRNA ligase, putative			14.5635	14.611	14.7673				14.7776	16.1769	15.3205	16.1928		15.9319									19.9421				62.453	0	1	0	7.08493	3.682				9	1	1	0	0	0	0	1	2	1	1
PF3D7_0719700	PF3D7_0719700	P. falciparum 3D7	40S ribosomal protein S10, putative										19.911	20.1571	18.9364	20.2421	21.137								22.0746	22.3135	21.1247	22.6644	22.214	16.478	0	1	0	7.63769	4.9156				9	0	0	0	0	0	0	0	2	2	1
PF3D7_0721100	PF3D7_0721100	P. falciparum 3D7	conserved Plasmodium protein, unknown function										17.794	16.948												19.9415				29.25	0	1	0	6.59003	3.2425				2	0	0	0	0	0	0	0	1	0	0
PF3D7_0722200	PF3D7_0722200	P. falciparum 3D7	rhoptry-associated leucine zipper-like protein 1							16.8703	16.8991	15.0178	16.5219	18.518	15.2638	15.9854	17.5302					21.5557	21.6089		21.6697	22.8412			21.5754	87.878	0	1	0	7.58447	13.284				17	0	0	0	0	2	2	0	4	4	1
PF3D7_0722400	PF3D7_0722400	P. falciparum 3D7	Obg-like ATPase 1, putative			15.1817	14.9763	16.4042				16.1185	17.5061	17.0981		15.6554	18.7829			20.9014				20.8338	21.2958	21.1055				45.163	0	1	0	7.38553	6.8299				10	1	1	2	0	0	0	1	2	1	0
PF3D7_0727400;P28066	PF3D7_0727400	P. falciparum 3D7	proteasome subunit alpha type-5, putative			17.565	17.321	17.2957	17.2538		17.202	17.6524	17.7272	18.5041	18.3492	18.9072	18.1248	21.8313	21.5308	21.4463				22.0068		22.2939	21.1656	21.9562		28.388	0	1	1	7.66689	4.6558				16	1	1	1	1	1	1	2	1	2	2
PF3D7_0730800.2-p1;PF3D7_0730800	PF3D7_0730800.2-p1;PF3D7_0730800	P. falciparum 3D7	Plasmodium exported protein, unknown function, unspecified product			14.8855	13.8058	14.1944	21.3646	21.0373	21.3291				21.7326	21.0615	21.757				24.6811	24.1946	24.1642				24.317	24.2535	24.002	32.154		1	0	8.37059	12.206				22	1	0	1	5	2	2	0	0	0	5
PF3D7_0730900	PF3D7_0730900	P. falciparum 3D7	EMP1-trafficking protein			14.7872	16.0464	16.0908	25.8312	25.9157	25.9955	16.8634	18.2253	17.9751	27.2354	26.1488	27.3578	22.5191	23.2961	23.1529	32.2897	32.1842	32.0673	23.867	24.1174	24.1253	33.1559	32.1604	32.8271	244.19	1	1	0	10.8646	323.31				1188	2	4	4	137	139	134	6	6	7	224
PF3D7_0731100	PF3D7_0731100	P. falciparum 3D7	EMP1-trafficking protein						21.2307	21.1621	21.1202	15.2468	15.6624	15.4616	23.6865	22.3351	23.7286				26.976	26.5536	26.604				28.0762	27.4073	27.8019	103.07	1	1	0	9.32496	323.31				174	0	0	0	20	13	19	0	1	1	49
PF3D7_0731600	PF3D7_0731600	P. falciparum 3D7	acyl-CoA synthetase						20.845	20.7145	20.6805	14.9043	16.0154	15.4833	24.9225	23.9584	24.9628				26.2372	26.1075	25.9271				29.0111	28.1507	28.5682	93.283	1	1	0	9.50391	124.66				119	0	0	0	9	4	8	0	1	0	30
PF3D7_0801000	PF3D7_0801000	P. falciparum 3D7	Plasmodium exported protein (PHISTc), unknown function						19.0669	18.9361	18.4876				22.1524	21.0655	22.0707				25.6068	25.2643	24.7543				27.2262	26.632	26.604	147.07	1	1	0	8.98959	274.36				107	0	0	0	13	9	6	0	0	1	33
PF3D7_0801800	PF3D7_0801800	P. falciparum 3D7	mannose-6-phosphate isomerase, putative			15.2045	15.1186	15.3411	17.0994	16.4255	18.0697	15.3773	15.8479	15.891	15.6086	15.4658	17.1706	21.4545	21.483	21.7158	21.7732	21.6306	22.3217	21.7223	21.4721	21.5827	21.5441		21.7473	117.66	0	1	0	7.78092	7.4409				19	1	0	1	2	3	5	1	1	2	0
PF3D7_0801900	PF3D7_0801900	P. falciparum 3D7	conserved Plasmodium protein, unknown function						14.4009	15.1505	15.419												22.3127							551.96	0	1	0	7.34825	2.2652				3	0	0	0	0	1	0	0	0	0	0
PF3D7_0802200	PF3D7_0802200	P. falciparum 3D7	1-cys peroxiredoxin						20.2046	16.4586	20.2969	21.2999	20.9326	21.3264	20.6176	19.1826	20.9711							24.3307	24.2678	24.6865	23.9225		23.7995	25.164	0	1	0	8.32404	8.0237				19	0	1	1	0	2	2	2	3	2	1
PF3D7_0803800	PF3D7_0803800	P. falciparum 3D7	proteasome subunit beta type-4			21.0022	20.9093	20.7085	20.7381	21.3979	20.553	21.3168	20.6958	21.3009	20.589	17.9651	21.7522	24.8811	24.6376	24.7695	23.9043	24.3778	24.4041	24.8764	24.3511	24.6757	23.5754		23.4923	30.872	0	1	0	8.52803	23.456				35	2	3	5	2	6	3	4	2	3	2
PF3D7_0804900	PF3D7_0804900	P. falciparum 3D7	GTPase-activating protein, putative			14.3448		14.1514												18.648										56.5	0	1	0	5.93353	2.3992				2	0	0	1	0	0	0	0	0	1	0
PF3D7_0805700	PF3D7_0805700	P. falciparum 3D7	serine/threonine protein kinase, FIKK family												13.2604		15.1201												19.8908	171.8	0	1	0	6.52652	2.8079				2	0	0	0	0	0	0	0	0	0	0
PF3D7_0806800	PF3D7_0806800	P. falciparum 3D7	V-type proton ATPase subunit a, putative							16.8869							16.8852												20.8388	123	0	1	0	7.00749	4.7468				5	0	0	0	0	2	0	0	0	0	0
PF3D7_0807500	PF3D7_0807500	P. falciparum 3D7	proteasome subunit alpha type-6, putative												17.9176	17.4042	18.5956										20.9649		21.1555	29.499	0	1	0	7.11644	3.0119				3	0	0	0	0	0	0	0	0	0	0
PF3D7_0807800	PF3D7_0807800	P. falciparum 3D7	26S proteasome regulatory subunit RPN10, putative			14.3918	14.0948	14.1777				13.4705	15.0904	14.5422												18.4685				55.066	0	1	0	6.42815	1.9432				6	1	0	1	0	0	0	1	2	1	0
PF3D7_0807900	PF3D7_0807900	P. falciparum 3D7	tyrosine--tRNA ligase										19.7406		17.2506	16.7562	18.2561								23.2145					43.453	1	1	0	7.39354	5.8762				4	0	0	0	0	0	0	0	2	0	0
PF3D7_0809600	PF3D7_0809600	P. falciparum 3D7	peptidase family C50, putative			17.2364	16.8157	16.8133	14.4628	14.6416												22.1977								698.18	0	1	0	8.09743	2.5671				2	0	0	1	1	0	0	0	0	0	0
PF3D7_0810000	PF3D7_0810000	P. falciparum 3D7	acyl-CoA binding protein, putative			21.0296	21.1691	21.3969	18.7113		19.6788	21.9535	20.4858	21.8276	21.1519	19.6693	21.7792	23.0568	23.6757	24.1095				24.4738	22.0571	23.48	22.3483	21.4018	22.2965	10.775	0	1	0	8.08888	6.0371				16	1	1	2	1	0	1	2	0	3	3
PF3D7_0810600	PF3D7_0810600	P. falciparum 3D7	ATP-dependent RNA helicase DBP1, putative									15.4022	16.4947	15.8488			15.0071							21.1225	21.477	21.0126				108.63	0	1	0	7.04735	4.0209				5	0	0	0	0	0	0	0	2	2	0
PF3D7_0811600	PF3D7_0811600	P. falciparum 3D7	conserved Plasmodium protein, unknown function										16.4581	14.1211			17.9213								22.2189				22.3087	144.01	0	1	0	7.3776	10.012				14	0	0	0	0	0	1	0	4	2	0
PF3D7_0813300	PF3D7_0813300	P. falciparum 3D7	conserved Plasmodium protein, unknown function			20.7465	21.1407	20.9741	20.3341	20.527	21.5903	21.5492	21.4623	22.123	21.2265	20.3434	21.7721	24.5105	24.3101	24.5983	22.8589	23.5983	23.6649	24.9495	24.141	24.9672	23.2821	23.3645	23.3101	36.255	0	1	0	8.47729	9.1295				33	1	3	4	2	2	3	2	4	5	2
PF3D7_0813400	PF3D7_0813400	P. falciparum 3D7	conserved Plasmodium protein, unknown function										16.6968	16.39											20.6366	20.4136				76.856	0	1	0	6.64527	18.736				3	0	0	0	0	0	0	0	2	1	0
PF3D7_0813900	PF3D7_0813900	P. falciparum 3D7	40S ribosomal protein S16, putative			22.2013	22.1988	22.3186	22.9479	23.2523	23.4041	22.9838	23.3376	23.5869	23.2678	22.6972	23.6096	25.2961	25.3975	25.4362	24.9584	25.2133	25.0772	25.792	25.3943	25.8142	24.9406	24.5522	24.6811	16.285	0	1	0	8.86715	23.381				48	3	5	1	5	5	4	3	6	4	4
PF3D7_0814000	PF3D7_0814000	P. falciparum 3D7	60S ribosomal protein L13-2, putative			21.8398	20.2954	21.8624	22.0356	21.4872	21.7581	22.7552	22.8949	23.48	21.1567	19.3821	22.7108	25.5075	25.1946	25.5195	25.0567	24.8764	24.8044	25.7594	25.558	25.7364	24.5225		24.7995	25.441	0	1	0	8.79036	12.362				42	2	4	5	2	3	3	5	5	7	2
PF3D7_0814200	PF3D7_0814200	P. falciparum 3D7	DNA/RNA-binding protein Alba 1			21.0786	20.8582	20.7892	20.3669	20.6566	21.3501	21.9155	23.0696	21.7362	21.1229	22.4653	23.3101	25.1871	25.0401	24.9803	24.019	24.1488	24.5983	25.0062	25.3745	25.1488	24.2821	24.8576	24.9628	27.258	0	1	0	8.74552	9.6435				34	2	2	1	3	3	3	3	4	4	2
PF3D7_0815600	PF3D7_0815600	P. falciparum 3D7	eukaryotic translation initiation factor 3 subunit G, putative									16.5682	18.339	17.9233											21.3099	21.0428				31.251	0	1	0	6.90997	5.3079				4	0	0	0	0	0	0	0	2	1	0
PF3D7_0817500	PF3D7_0817500	P. falciparum 3D7	protein kinase c inhibitor-like protein, putative			20.6924	20.2746	20.8537	20.8487	20.266	20.8887	20.3815	21.1668	21.4831	20.8121	18.5192	21.3154	24.1015	24.0772	24.5522	23.6865	23.6649	23.976	24.2535	23.895	24.3778	23.2535	22.4274	23.089	21.177	0	1	0	8.41014	11.976				52	5	4	3	6	4	5	3	4	7	5
PF3D7_0817700	PF3D7_0817700	P. falciparum 3D7	rhoptry neck protein 5													14.4313	16.9214												21.183	133.69	0	1	0	6.88098	2.2636				2	0	0	0	0	0	0	0	0	0	0
PF3D7_0817900	PF3D7_0817900	P. falciparum 3D7	high mobility group protein B2			22.1848			22.17	21.8502	22.8407	22.8942	24.2463	23.5285	20.8814	22.5242	23.8093							24.1871	25.417					11.534	0	1	0	8.39775	21.899				13	1	0	0	1	1	0	2	2	1	1
PF3D7_0818900;P0DMV9;P0DMV8;P34931;P11021	PF3D7_0818900	P. falciparum 3D7	heat shock protein 70			22.3979	22.388	23.2961	22.5736	22.6456	23.3376	23.3645	24.0359	24.1795	23.5522	23.4425	24.6486	27.9814	28.249	28.3023	27.4862	27.4938	27.7771	28.509	28.341	28.5389	27.4394	27.2625	27.8564	73.914	0	1	1	9.68302	158.21				257	21	19	20	16	15	21	20	26	27	18
PF3D7_0819600	PF3D7_0819600	P. falciparum 3D7	conserved Plasmodium protein, unknown function			17.4757	17.3775	17.4691	17.0393	17.1958	18.8319	17.0766	17.8372	18.0492		18.4115	18.0535	21.7072	21.614	21.616			22.0681	21.4214	21.5108	21.7046				32.165	0	1	0	7.66177	8.3303				25	2	1	2	2	3	4	1	1	3	1
PF3D7_0819900	PF3D7_0819900	P. falciparum 3D7	U6 snRNA-associated Sm-like protein LSm3, putative						17.2308	16.8728	16.8652	19.2153	17.6951	17.2914	18.9786		19.5708							21.6449			21.0196		20.795	10.701	0	1	0	7.20464	4.747				6	0	0	0	0	1	0	1	1	0	1
PF3D7_0821100	PF3D7_0821100	P. falciparum 3D7	protein kinase 1																											107.24	0	1	0	NaN	3.5049				4	0	0	0	2	0	1	0	0	0	0
PF3D7_0821400	PF3D7_0821400	P. falciparum 3D7	conserved Plasmodium protein, unknown function			21.0043	20.9381	20.9955	21.152	20.823	20.6042	21.0031	21.6573	21.1236	21.1487	21.7649	21.7379	23.9134	24.1642	24.1095	23.5869	23.2821	22.7551	24.2607	24.1946	23.7389	22.9727	23.5404	23.0102	14.06	0	1	0	8.3664	4.8807				31	1	1	4	3	1	4	3	3	3	3
PF3D7_0821700	PF3D7_0821700	P. falciparum 3D7	60S ribosomal protein L22, putative			18.3393	18.9456	18.5619	19.3	19.3563	19.3511	20.603	21.2148	21.4592	19.0594		19.6573							22.7588	22.4667	23.04				16.382	0	1	0	7.66246	3.1215				13	1	1	1	1	1	1	1	2	2	1
PF3D7_0822600	PF3D7_0822600	P. falciparum 3D7	protein transport protein SEC23						20.8245	21.1234	21.1628				19.9993	17.705	20.1857				25.558	25.6784	25.2856				23.9933	23.5404	24.0772	86.168	1	1	0	8.5313	18.36				33	0	0	0	7	7	7	0	0	0	6
PF3D7_0823200	PF3D7_0823200	P. falciparum 3D7	RNA-binding protein, putative									16.6381	18.6117	18.4036			18.3013									21.638				32.441	0	1	0	7.18298	4.2023				2	0	0	0	0	0	0	1	0	1	0
PF3D7_0823800	PF3D7_0823800	P. falciparum 3D7	DnaJ protein, putative									15.5753	17.3078	16.9757	16.0062	16.373	18.8908							21.4199	21.6354	21.4571	20.9689		21.887	76.681	0	1	0	7.49492	8.4525				10	0	0	0	0	0	0	0	3	2	0
PF3D7_0824400	PF3D7_0824400	P. falciparum 3D7	nucleoside transporter 2				17.0444	17.6803	18.2058	17.8529	18.3103	18.0189	18.4321	18.0706	19.3489	18.4883	19.7281				22.6234				22.8341	22.79	23.247	22.8355	23.0827	67.641	0	1	0	8.09426	5.8232				16	0	1	1	2	1	1	0	2	2	2
PF3D7_0826100	PF3D7_0826100	P. falciparum 3D7	E3 ubiquitin-protein ligase, putative												12.5172	13.6363												21.244		1005.1	0	1	0	6.77994	1.9502				2	0	0	0	0	0	0	0	1	0	0
PF3D7_0826700	PF3D7_0826700	P. falciparum 3D7	receptor for activated c kinase			20.0296	21.3368	21.6007	21.5473	21.4784	21.8102	21.4821	21.9651	22.0522	21.5016	20.9623	21.0057	24.5869	24.7286	25.065	24.6865	24.5225	24.4551	25.1174	25.065	25.3376	24.391	25.019	24.7796	35.686	0	1	0	8.69085	27.48				64	4	5	6	6	6	8	8	3	8	4
PF3D7_0827900	PF3D7_0827900	P. falciparum 3D7	protein disulfide isomerase			16.7743	16.5863	17.0421	16.5676	17.8297	17.3665	17.8568	19.9021	19.8165	19.1036	20.2427	21.2156					22.6959		23.5165	24.2535	24.2891	22.6883	23.5404	23.9933	55.514	0	1	0	8.27376	18.85				27	1	0	1	1	1	0	0	6	3	2
PF3D7_0830500	PF3D7_0830500	P. falciparum 3D7	sporozoite and liver stage tryptophan-rich protein, putative						22.2092	21.918	22.4647				16.7969	14.2403	17.5117				27.3325	26.7389	27.0711				21.6429		21.8356	80.442	1	1	0	8.83652	66.08				47	0	0	0	14	16	15	0	0	0	0
PF3D7_0831200	PF3D7_0831200	P. falciparum 3D7	DnaJ protein, putative												16.1487	14.5098	15.6274										20.6862			114.1	0	1	0	6.81935	4.0365				3	0	0	0	0	0	0	0	0	0	2
PF3D7_0831300	PF3D7_0831300	P. falciparum 3D7	Plasmodium exported protein, unknown function												16.5748												21.0128			98.971	1	1	0	6.61277	2.7312				1	0	0	0	0	0	0	0	0	0	1
PF3D7_0831400	PF3D7_0831400	P. falciparum 3D7	Plasmodium exported protein, unknown function			17.4469	17.2844	17.192	19.9465	19.8988	19.7461	18.188	18.6365	18.5058	20.7406	20.3359	21.1914	21.4276	21.2981	21.2719	22.9713	23.0265	22.6138	22.2958	21.9519	21.7847	23.4425	23.1121	23.3645	36.413	1	1	0	8.10975	13.649				21	0	1	2	2	3	2	2	1	0	4
PF3D7_0831500	PF3D7_0831500	P. falciparum 3D7	Plasmodium exported protein (PHIST), unknown function												20.6376	21.7854	23.1014										25.4645	25.2499	25.4831	39.097	1	1	0	8.47589	21.723				19	0	0	0	0	0	0	0	0	0	7
PF3D7_0831700;P38646	PF3D7_0831700	P. falciparum 3D7	heat shock protein 70			21.5775	21.4573	21.7636	23.0234	22.9767	23.4041	21.7747	22.7427	22.6706	23.895	23.5522	24.4488	26.5478	26.2661	26.3014	28.2123	27.8385	27.7325	27.1015	26.9202	26.9089	28.4073	28.1263	28.141	75.052	1	1	1	9.59177	124.24				207	7	10	11	19	18	20	9	16	14	30
PF3D7_0903200;P51149	PF3D7_0903200;P51149	P. falciparum 3D7	ras-related protein RAB7	Ras-related protein Rab-7a	RAB7A	19.3758	19.1686	19.1387	19.1001	19.0828	19.0271	18.1348	18.7572	18.6822	18.6118	19.6148	20.5658	22.7566	22.6605	22.4865	22.7089	22.4452	22.4552					22.62	21.8879	23.788	0	1	1	7.94873	21.851				27	2	2	3	1	3	3	3	2	2	1
PF3D7_0903700;PF3D7_0422300	PF3D7_0903700	P. falciparum 3D7	alpha tubulin 1;alpha tubulin 2			18.5751	17.9266	17.6203	17.6394	17.5124	17.8312	18.4797	19.7377	19.7795	18.1878	19.1261	19.1518							23.186	23.5165	23.5522				50.296	0	1	0	8.02625	12.839				11	2	1	1	0	0	1	0	3	1	0
PF3D7_0903900	PF3D7_0903900	P. falciparum 3D7	60S ribosomal protein L32			22.648	22.6974	23.7695	23.1489	22.8941	23.3511	23.9316	23.9847	23.2678	23.3239	22.4738	24.0608	25.2317	25.4362	25.9628	24.8623	24.3511	24.8142	26.3612	25.4266	25.4425	24.604	24.3578	24.6757	15.526	0	1	0	8.81946	7.1339				42	4	2	4	3	1	4	5	3	4	5
PF3D7_0904800	PF3D7_0904800	P. falciparum 3D7	replication protein A1, small fragment										16.9669	16.9058	16.1437	15.999	17.5741								21.2215	21.288				56.234	0	1	0	7.22876	3.9533				5	0	0	0	0	0	0	0	2	0	0
PF3D7_0904900	PF3D7_0904900	P. falciparum 3D7	copper-transporting ATPase			14.951	13.9777	14.3282	15	14.4679	15.7049												21.7063							299.39	1	1	0	7.32037	1.9797				0	0	0	0	0	0	0	0	0	0	0
PF3D7_0905400	PF3D7_0905400	P. falciparum 3D7	high molecular weight rhoptry protein 3			20.6903	19.7975	19.7525	23.6865	23.6865	24.0359	20.2668	22.0658	21.777	25.0105	23.9933	25.1095	26.726	26.0254	26.341	28.5165	28.5128	28.3828	26.4536	27.141	27.0813	29.4765	28.673	29.3217	104.85	1	1	0	9.82006	323.31				352	13	10	10	35	31	39	9	23	16	56
PF3D7_0910100	PF3D7_0910100	P. falciparum 3D7	exportin-7, putative				12.9604	13.482	14.6893		14.8635	13.7179	14.6411	14.576			15.9738									19.6335				139.18	0	1	0	6.9712	2.8371				7	0	0	1	0	0	1	1	2	1	0
PF3D7_0911900	PF3D7_0911900	P. falciparum 3D7	falstatin			16.646	16.4608	16.6462	17.1303	17.7138	17.5264	17.1278	17.1271	17.5253		17.0876	17.7911									21.3813				46.957	1	1	0	7.52728	3.0003				7	1	1	0	0	1	1	1	0	1	0
PF3D7_0913200	PF3D7_0913200	P. falciparum 3D7	elongation factor 1-beta				17.6624	17.7155				19.3106	20.7208	20.0263	16.9365	21.5511	21.8687							23.2821	23.4923	23.48				32.026	1	1	0	8.15125	52.583				23	0	0	1	0	0	0	1	6	6	0
PF3D7_0914700	PF3D7_0914700	P. falciparum 3D7	major facilitator superfamily-related transporter, putative			17.1236	17.3338	17.5859	19.0073	18.9477	19.5285	17.5476	17.9758	17.9468	19.3339	19.4187	19.8116									21.9403				58.42	0	1	0	8.06483	5.3924				15	1	1	1	1	1	2	2	0	1	1
PF3D7_0915400	PF3D7_0915400	P. falciparum 3D7	ATP-dependent 6-phosphofructokinase			15.2235	14.9667	16.6223	16.1259	16.3966	16.8691	17.7139	18.0594	18.1477	16.4667	16.5202	18.244	22.9468	22.8718	22.9142	22.6036	22.7519	22.8339	23.1746	23.0689	23.158	22.5103	22.9966	23.1697	159.45	0	1	0	8.14457	17.955				29	0	2	3	2	3	0	2	3	4	3
PF3D7_0916700	PF3D7_0916700	P. falciparum 3D7	RNA-binding protein musashi, putative											17.9776			17.7731									21.971				45.142	0	1	0	7.02555	3.146				7	0	0	1	0	1	1	0	1	2	0
PF3D7_0917900	PF3D7_0917900	P. falciparum 3D7	heat shock protein 70			21.1804	20.6228	21.1773	22.053	22.387	22.378	22.128	23.8191	23.5165	22.1895	22.5566	23.2026	26.7129	25.9606	26.5165	26.3612	26.6865	26.5165	26.8142	27.524	27.673	26.6181	26.7771	26.8858	72.387	0	1	0	9.34437	95.796				137	7	5	7	8	13	12	9	23	17	9
PF3D7_0918000	PF3D7_0918000	P. falciparum 3D7	glideosome-associated protein 50			19.969	19.0481	19.1688	19.4469	19.7415	20.6919	18.9927	20.8022	20.703	20.0877	19.8129	21.394	24.1095	23.6757	23.7182	23.0979	23.2335	23.9672	23.5404	24.7129	24.7389	23.3376	23.4298	24.0105	44.604	0	1	0	8.45609	6.4852				26	2	2	2	3	1	3	1	2	2	2
PF3D7_0918300	PF3D7_0918300	P. falciparum 3D7	eukaryotic translation initiation factor 3 subunit F, putative									17.168	17.8686	17.9376	17.1022		17.7775								21.4775	21.5946				36.82	0	1	0	7.25655	3.083				6	0	0	0	0	0	0	1	2	2	0
PF3D7_0919000	PF3D7_0919000	P. falciparum 3D7	nucleosome assembly protein			15.6661	15.0361	15.2789		17.0664		18.0061	21.1313	21.3479	17.1985	17.7999	18.2877							23.3645	23.6757	24.9134				31.826	0	1	0	7.96782	12.565				21	2	0	0	0	1	1	3	4	7	1
PF3D7_0919900	PF3D7_0919900	P. falciparum 3D7	regulator of chromosome condensation, putative			11.6201	13.0713	13.1011			20.0197	13.4877		12.7865						20.4329										396.15	0	1	0	8.23812	3.979				5	1	1	1	0	0	1	0	0	1	0
PF3D7_0920800	PF3D7_0920800	P. falciparum 3D7	inosine-5'-monophosphate dehydrogenase			16.1807	14.8533	16.7554				16.6612	17.1679	17.4196	16.8918	16.9305	17.8841										20.6111	20.743	21.1477	56.15	0	1	0	7.45068	3.1488				8	0	0	1	0	0	0	1	1	1	1
PF3D7_0922100	PF3D7_0922100	P. falciparum 3D7	ubiquitin-like protein, putative																											182.09	0	1	0	NaN	2.3157				2	0	0	0	0	0	0	0	1	0	0
PF3D7_0922200	PF3D7_0922200	P. falciparum 3D7	S-adenosylmethionine synthetase			22.6486	22.3298	23.1949	23.2424	23.6865	23.976	22.3192	23.7492	23.8858	23.9134	23.193	24.6918	27.2535	27.1795	27.4938	27.1115	27.0401	27.2445	27.1115	27.3494	27.4073	26.9428	26.6865	27.2979	44.843	1	1	0	9.451	75.165				120	7	8	9	9	8	11	8	11	14	9
PF3D7_0922500	PF3D7_0922500	P. falciparum 3D7	phosphoglycerate kinase			22.9006	22.4869	22.5429	22.6174	23.0476	23.3778	22.7186	23.8481	23.7594	23.9316	23.4676	24.217	27.8019	27.611	27.6798	27.141	27.2535	27.391	27.7389	28.0137	28.1015	26.9869	27.1507	27.5315	45.426	1	1	0	9.55832	91.213				253	18	18	19	19	19	22	18	26	25	21
PF3D7_0922600	PF3D7_0922600	P. falciparum 3D7	glutamine synthetase, putative									15.5092	16.2033	16.0498			17.0053									20.5838				63.23	0	1	0	7.01229	2.5191				2	0	0	0	0	0	0	0	1	0	0
PF3D7_0923900	PF3D7_0923900	P. falciparum 3D7	RNA-binding protein, putative			19.2509	19.474	19.7538	19.7003	20.1395	19.773	19.4046	19.9488	18.9716	20.1088	19.9989	20.4257		23.0558	23.3511	22.7108	23.1838		22.5037						22.979	0	1	0	8.08063	16.12				13	1	1	2	0	2	1	0	1	1	2
PF3D7_0925900	PF3D7_0925900	P. falciparum 3D7	conserved Plasmodium protein, unknown function			17.9787	17.502	17.8284	17.0262	17.2121	17.4785	17.355	19.5009	20.3584	18.7977	19.7059	19.9082								22.5733	22.8211			22.1206	24.698	0	1	0	7.75536	4.0571				12	0	0	1	0	1	1	0	2	3	0
PF3D7_0926400	PF3D7_0926400	P. falciparum 3D7	monocarboxylate transporter, putative						16.2776	16.2655	17.2808		16.4733	16.4664	16.7148	17.0732	17.4141									20.524				60.708	0	1	0	7.32508	2.9125				8	0	0	0	1	2	1	0	1	1	1
PF3D7_0927100	PF3D7_0927100	P. falciparum 3D7	conserved Plasmodium protein, unknown function																											22.751	0	1	0	NaN	2.1251				1	0	0	0	0	0	0	0	0	0	1
PF3D7_0927600	PF3D7_0927600	P. falciparum 3D7	RNA-binding protein, putative									12.0222	14.4333	14.2353			16.8403									18.6272				69.551	0	1	0	6.67435	1.9033				2	0	0	0	0	0	0	0	1	0	0
PF3D7_0927900	PF3D7_0927900	P. falciparum 3D7	phosphatidylserine decarboxylase												15.9394		17.0029												19.9566	41.547	0	1	0	6.61043	1.9574				2	0	0	0	0	0	0	0	0	0	0
PF3D7_0929400	PF3D7_0929400	P. falciparum 3D7	high molecular weight rhoptry protein 2			20.4672	19.8588	20.0483	22.3258	22.6711	22.7048	20.1042	21.8423	21.6032	22.752	21.7165	23.5983	27.3828	26.6865	27.0711	28.1459	28.2262	28.0084	26.9089	27.5969	27.4473	27.8682	27.2354	28.1747	162.66	1	1	0	9.63152	158.18				339	13	11	18	35	39	36	14	24	33	41
PF3D7_0930300;PF3D7_1312000	PF3D7_0930300	P. falciparum 3D7	malonyl CoA-acyl carrier protein transacylase;merozoite surface protein 1			20.4871	20.2342	20.9688	20.9103	20.8933	21.5119	20.8853	22.6536	22.1054	21.2079	22.3631	22.9521	27.2803	26.8264	27.1795	26.8264	26.8504	27.1214	27.0914	27.9372	27.5463	26.3662	27.5969	27.3494	195.72	0	1	0	9.46632	220.48				316	18	9	14	16	26	26	16	48	32	17
PF3D7_0931800	PF3D7_0931800	P. falciparum 3D7	proteasome subunit beta type-6, putative				19.2513	19.4199	19.4467	20.7013	19.5723	19.3542	20.3528	19.4279			19.9221		23.3645	23.3778		23.7389		23.2168	23.5045					32.601	0	1	0	8.06168	9.7467				20	0	2	3	2	3	1	3	2	2	0
PF3D7_0932200	PF3D7_0932200	P. falciparum 3D7	profilin			21.0614	22.4607	22.7266	22.3101	21.8184	22.2915	22.5002	22.5221	22.9201	22.0476	22.2671	22.4962	24.654	25.3511	25.5344	25.2926	24.7543	24.8385	25.3031	25.3376	25.0813	24.7645	25.217	24.6811	19.017	0	1	0	8.76126	93.892				78	7	8	7	5	5	8	7	6	8	4
PF3D7_0932800	PF3D7_0932800	P. falciparum 3D7	importin alpha re-exporter, putative					13.7763		16.1467		12.9566	14.3242	14.8721		16.2983	17.1181											21.4827	21.6675	159.11	0	1	0	7.35809	7.8775				12	0	0	2	0	1	0	1	1	2	1
PF3D7_0934500	PF3D7_0934500	P. falciparum 3D7	V-type proton ATPase subunit E, putative			17.5861		17.8789					18.0213	18.1025												20.8065				27.19	0	1	0	6.94781	2.6882				3	0	0	1	0	0	0	0	1	1	0
PF3D7_0934800	PF3D7_0934800	P. falciparum 3D7	cAMP-dependent protein kinase catalytic subunit			14.2423	13.7829	14.567	16.4509	16.7389	16.6468	17.1215	18.2401	17.9702	16.9852		18.5907							21.6026	22.0208	21.6851				40.196	0	1	0	7.50319	7.0599				9	0	1	0	1	0	1	0	2	2	0
PF3D7_0935800	PF3D7_0935800	P. falciparum 3D7	cytoadherence linked asexual protein 9						18.0488	18.1045	18.4483			17.4859	17.9994	17.4073	18.9595												23.5869	160.42	0	1	0	8.13567	3.8534				8	0	0	0	1	1	1	0	1	1	1
PF3D7_0935900	PF3D7_0935900	P. falciparum 3D7	ring-exported protein 1			14.7862	16.051	16.4841	19.7431	19.6357	19.9116	17.9823	19.4652	18.8536	21.1718	20.7185	21.2534	22.6909	22.3507	23.0684	24.4488	23.9225	23.9406	23.2347	23.6649	23.4923	24.8093	25.5014	24.3844	83.04	1	1	0	8.5693	43.91				55	0	0	3	6	3	8	1	4	6	8
PF3D7_0936000	PF3D7_0936000	P. falciparum 3D7	ring-exported protein 2			18.962	18.3716	18.5937	20.8454	20.1435	20.8455	18.7592	20.2385	19.7866	19.417	21.7752	21.7198				22.8179	22.1946	22.6131					23.6096	22.9119	10.771	1	1	0	7.99564	4.9572				11	1	0	0	1	0	2	0	1	0	2
PF3D7_0936800	PF3D7_0936800	P. falciparum 3D7	Plasmodium exported protein (PHISTc), unknown function				16.2911	16.3512	23.7895	23.632	23.9672	16.5439	18.5845	16.7352	25.4362	24.239	25.5812				26.524	27.6251	27.3745	21.253	22.2961	21.0636	28.6355	25.797	28.3704	45.5	1	1	0	9.40844	233.24				105	0	1	0	12	14	15	1	1	2	21
PF3D7_1001000	PF3D7_1001000	P. falciparum 3D7	Plasmodium exported protein (hyp12), unknown function						20.2091	20.2536	19.9877				23.4425	22.7446	23.7796				24.141	24.0105	23.7286				25.8288	25.3443	25.7594	27.617	1	1	0	8.63924	71.404				32	0	0	0	2	2	3	0	0	0	8
PF3D7_1001200	PF3D7_1001200	P. falciparum 3D7	acyl-CoA binding protein, isoform 2, ACBP2			21.5418	22.5625	22.5117	20.205	22.2038	22.2191	21.2387	21.1968	20.3805	23.0725	21.9825	23.2292	23.8481	24.6431	24.8191		24.0526	23.7286	25.0526	24.2607	23.7594	24.3443	23.6209	24.2463	10.767	0	1	0	8.52001	6.9569				23	1	3	3	0	3	1	3	2	2	1
PF3D7_1001600	PF3D7_1001600	P. falciparum 3D7	exported lipase 2						18.3783	17.4066	18.7644				22.4919	20.5322	22.8977										26.5898	25.8142	26.5725	88.563	1	1	0	8.78901	58.693				41	0	0	0	2	0	2	0	0	0	17
PF3D7_1002100	PF3D7_1002100	P. falciparum 3D7	EMP1-trafficking protein						15.2463	14.9834	19.2526	12.5232	13.9116	13.3194	18.9466	17.3116	15.5738						23.0902				22.7541	21.9376	22.5925	69.85	1	1	0	7.72779	3.8525				9	0	0	0	1	1	2	0	1	0	2
PF3D7_1002200	PF3D7_1002200	P. falciparum 3D7	tryptophan-rich antigen 3						12.6843	12.9162	12.4139				16.8172	17.8783	18.719										22.5164	22.89	22.1894	118.67	0	1	0	7.61481	16.508				13	0	0	0	1	0	0	0	0	0	4
PF3D7_1002900	PF3D7_1002900	P. falciparum 3D7	conserved Plasmodium protein, unknown function			17.4604	17.1229	17.8923				18.2853	18.8386	18.5453						21.046				21.3641	21.1497	21.071				14.517	0	1	0	7.14292	3.0236				5	0	1	1	0	0	0	1	1	1	0
PF3D7_1003000	PF3D7_1003000	P. falciparum 3D7	conserved Plasmodium protein, unknown function												17.0511												21.9297			149.59	0	1	0	6.88878	2.2474				2	0	0	0	0	0	0	0	0	1	1
PF3D7_1003600	PF3D7_1003600	P. falciparum 3D7	inner membrane complex protein 1c, putative			18.513	18.9341		19.4065	19.0314	19.3536	18.3929	17.5204			19.4147	18.6665				22.876		22.7227							32.653	0	1	0	7.87615	13.612				15	1	1	1	2	2	0	2	1	0	2
PF3D7_1004000	PF3D7_1004000	P. falciparum 3D7	60S ribosomal protein L13, putative				21.3649	21.544	21.4644	21.5344	22.0289	21.7307	21.511	21.5754	21.6326	19.191	21.4488									24.5696				23.754	0	1	0	8.55025	5.1465				22	0	2	2	2	2	1	2	1	3	2
PF3D7_1006200	PF3D7_1006200	P. falciparum 3D7	DNA/RNA-binding protein Alba 3			20.2968	20.2508	20.7547	20.5787	21.1043	22.0862	21.6215	22.9309	23.0414	21.7822	23.3101	23.1285	24.2244	23.8576	24.2244	23.2678	23.3239	23.9316	24.7077	25.1095	25.1984	23.7895	25.1681	24.632	11.977	0	1	0	8.64827	14.508				53	3	3	2	4	6	3	4	4	6	6
PF3D7_1006800	PF3D7_1006800	P. falciparum 3D7	single-strand telomeric DNA-binding protein GBP2, putative							17.8315	16.6278		19.5652	20.6645	17.3796	18.8841	19.1265									23.654				29.53	0	1	0	7.64333	4.8099				8	0	0	0	0	1	1	0	2	2	0
PF3D7_1007900	PF3D7_1007900	P. falciparum 3D7	eukaryotic translation initiation factor 3 subunit D, putative			12.5492		13.6307					16.7828			17.2411	17.6619											21.5534		63.109	0	1	0	7.21197	7.7816				7	0	0	1	0	0	0	0	2	0	0
PF3D7_1008700;P07437;Q9BVA1;Q13885;P68371	PF3D7_1008700	P. falciparum 3D7	tubulin beta chain			18.5221	17.0071	18.4025	20.0068	20.1356	20.4058	19.052	20.862	20.8189	20.3847	20.8107	20.9618	23.654		23.5754	23.5285	23.8288	23.6757	23.3778	24.48	24.6096	23.6431	24.3239	23.7695	49.75	0	1	1	8.44713	11.276				31	2	1	1	1	3	3	1	5	3	4
PF3D7_1008900	PF3D7_1008900	P. falciparum 3D7	adenylate kinase						16.4269		17.0547	15.9375	17.6134	16.9785	17.7207	17.9459	19.5243												21.893	27.61	0	1	0	7.41076	5.5341				6	0	0	0	0	1	1	0	1	1	0
PF3D7_1011800	PF3D7_1011800	P. falciparum 3D7	PRE-binding protein			15.4735	15.6902	15.454	15.1555	16.4913	17.2782	16.7941	18.4557	18.3266	17.7921	17.8043	19.5481				21.9785	22.174	22.4563	23.0309	23.7695	23.0871	22.8792	22.828	23.7492	131.62	0	1	0	8.15351	30.408				57	0	2	4	0	3	4	1	10	10	3
PF3D7_1012200	PF3D7_1012200	P. falciparum 3D7	rhoptry associated adhesin					15.4444	16.2871	15.8449	15.3356		17.1466	17.5378		16.2216										21.4641				31.791	0	1	0	7.12607	5.9046				6	0	0	1	0	1	1	0	1	1	0
PF3D7_1012400	PF3D7_1012400	P. falciparum 3D7	hypoxanthine-guanine phosphoribosyltransferase			21.1356	21.3879	21.6366	22.092	22.2919	22.3965	21.288	22.6269	22.6281	22.4227	20.1934	23.2961		25.2961	25.3135	25.4831	24.9495	25.217	25.3205	25.6944	25.8973	25.141		25.5075	26.362	0	1	0	8.86241	12.254				43	3	3	3	3	4	5	2	4	6	6
PF3D7_1013300	PF3D7_1013300	P. falciparum 3D7	conserved Plasmodium protein, unknown function										15.2296	13.8616												18.3498				75.468	0	1	0	6.21814	3.0918				2	0	0	0	0	0	0	0	1	1	0
PF3D7_1014900	PF3D7_1014900	P. falciparum 3D7	conserved Plasmodium protein, unknown function										14.418	13.0929											21.0712					267.98	0	1	0	6.67363	1.9519				3	0	0	0	0	0	0	0	2	1	0
PF3D7_1015200.3-p1;PF3D7_1015200.2-p1;PF3D7_1015200	PF3D7_1015200.3-p1;PF3D7_1015200.2-p1;PF3D7_1015200	P. falciparum 3D7	cysteine--tRNA ligase						14.9588	15.306	16.0636	15.469	16.1114	15.8494	15.4398	15.8148	16.559									20.4278				69.423		1	0	7.23004	2.4296				6	1	0	0	0	0	1	0	1	1	0
PF3D7_1015600	PF3D7_1015600	P. falciparum 3D7	heat shock protein 60			14.4727	15.6321	16.4463			15.4593	15.9363	17.0286	17.0729	14.9743	15.823			21.1308	21.5788				21.295	21.6606	21.5696				62.55	1	1	0	7.35723	3.7868				8	1	0	1	0	0	1	0	2	1	1
PF3D7_1015900;P06733;P13929;P09104	PF3D7_1015900	P. falciparum 3D7	enolase			23.9043	23.5869	23.895	24.0608	24.4551	24.3975	23.5638	24.8717	24.5522	24.4923	24.4923	25.2096	28.6004	28.4194	28.5536	28.1263	28.3951	28.1556	28.5165	28.7958	28.7518	28.0453	28.3282	28.2979	48.677	0	1	1	9.81291	265.6				221	13	14	19	15	17	17	11	21	18	19
PF3D7_1016300;PF3D7_0937000	PF3D7_1016300	P. falciparum 3D7	glycophorin binding protein;Plasmodium exported protein (PHISTb), unknown function			22.3688	21.824	22.2058	22.848	22.7668	23.3239	22.7392	24.0359	23.867	24.604	24.4234	25.3811	28.2979	27.8445	28.258	28.3536	28.0505	28.4707	28.726	29.2869	29.267	29.4394	29.3848	29.7014	95.843	1	1	0	10.0094	247.4				262	15	12	10	16	15	14	16	28	19	23
PF3D7_1016400	PF3D7_1016400	P. falciparum 3D7	serine/threonine protein kinase, FIKK family						19.551	19.2856	19.7819				22.3726	21.1473	22.6695				24.8997	24.7129	24.6209				26.141	24.9406	25.8552	72.419	1	1	0	8.72872	22.534				35	0	0	0	4	1	4	0	0	0	12
PF3D7_1017500	PF3D7_1017500	P. falciparum 3D7	conserved Plasmodium protein, unknown function			19.0038	17.4519		17.1097	17.6938	17.9805							22.0038												15.677	0	1	0	7.02268	4.0128				4	2	0	0	0	1	1	0	0	0	0
PF3D7_1019000	PF3D7_1019000	P. falciparum 3D7	eukaryotic translation initiation factor subunit eIF2A, putative				14.6192	14.3225		13.4101	14.3765	14.0483	13.8831	13.9965						21.1145										280.75	0	1	0	7.1345	1.948				1	0	0	0	0	0	1	0	0	0	0
PF3D7_1021900	PF3D7_1021900	P. falciparum 3D7	PHAX domain-containing protein, putative			10.785		11.0943				12.4024	13.7789	14.3009			12.7715							20.0419	20.3764	19.5247				267.38	0	1	0	6.73755	6.1783				6	1	0	1	0	0	0	0	1	2	0
PF3D7_1023100	PF3D7_1023100	P. falciparum 3D7	dynein heavy chain, putative			19.241	19.6246	20.1135				19.5503	18.3475	19.1326		17.8883	18.7008											25.4138		671.87	0	1	0	9.17655	2.0511				4	1	0	1	0	0	0	0	0	0	1
PF3D7_1023200	PF3D7_1023200	P. falciparum 3D7	orotidine 5'-phosphate decarboxylase			17.3926	17.3451	17.718												22.0031										37.824	0	1	0	7.02239	1.967				3	1	1	0	0	0	0	0	0	0	1
PF3D7_1023900	PF3D7_1023900	P. falciparum 3D7	chromodomain-helicase-DNA-binding protein 1 homolog, putative				10.3011			11.4434	11.4606		12.0608	11.0705	12.2612		12.7701								18.5969					381.25	0	1	0	6.55337	4.3992				9	0	1	0	0	1	0	1	3	1	0
PF3D7_1026800	PF3D7_1026800	P. falciparum 3D7	40S ribosomal protein S2			18.4823	17.9643	20.9141	20.7988	21.1481	20.9967	21.1162	21.9932	21.8841	21.4825	22.1784	22.6042			24.5754	24.0854	24.1946	23.9584	24.7182	25.0359	25.0854	23.7286	25.0772	24.4362	29.856	0	1	0	8.60044	13.796				36	1	1	3	2	5	4	3	2	4	4
PF3D7_1027800;P39023	PF3D7_1027800	P. falciparum 3D7	60S ribosomal protein L3			17.66	17.7837	18.5484	18.9898	19.1021	19.178	20.2018	20.6836	20.802	20.9159	19.3163	20.9482	23.1669	23.2678	23.8764	23.2205	23.1617	22.7067	23.9043	24.1015	23.4425	23.2821	23.654	23.3376	44.22	0	1	1	8.32956	19.781				36	1	1	2	4	3	4	2	5	3	5
PF3D7_1029600	PF3D7_1029600	P. falciparum 3D7	adenosine deaminase			17.983	18.1307	18.3909	18.6573	19.9815	19.3593	18.3412	20.0491	19.8851	17.4986	18.9236	19.203		22.6904	22.8872	22.6121	23.3778	22.8161	22.8487	23.8093	23.6757			22.2088	42.465	1	1	0	8.12594	6.446				17	1	2	2	1	2	1	1	2	1	1
PF3D7_1033200	PF3D7_1033200	P. falciparum 3D7	early transcribed membrane protein 10.2			18.0974	15.9668	17.8257	17.5702	17.8341	17.7899	19.5614	21.9223	21.5007	21.2238	22.4962	22.4619	23.5404		23.0191				23.8481	25.1795	24.7286	23.5869	25.3975	24.7389	38.925	1	1	0	8.56753	42.884				56	1	1	2	1	1	1	1	8	7	8
PF3D7_1033400	PF3D7_1033400	P. falciparum 3D7	haloacid dehalogenase-like hydrolase			19.0247	18.3826	18.9833	18.9563	19.0216	19.3684	19.4247	20.2066	20.1385	19.5706	19.7736	20.1262	22.9728	22.4426	22.9686	22.4151	22.3497	22.4338	23.3239	23.5285	23.48	22.5568		22.6289	32.841	0	1	0	8.13024	49.48				38	4	2	3	2	4	1	3	3	5	4
PF3D7_1034900	PF3D7_1034900	P. falciparum 3D7	methionine--tRNA ligase			13.5434	13.154					13.6251	17.2203	16.4678	14.8582	15.5044	17.3458								21.9472	21.9536				104.17	0	1	0	7.40601	11.416				12	1	0	0	0	0	1	0	2	2	1
PF3D7_1035200	PF3D7_1035200	P. falciparum 3D7	S-antigen			21.4588	20.69	20.9793	21.4262	21.3445	21.6628	20.7641	23.3101	22.1484	22.1814	24.4105	22.9279	26.4567	25.7182	26.0233	25.7156	25.4645	25.673	25.7871	27.5754	26.4122	25.8717	27.9539	26.0894	62.946	0	1	0	9.31925	323.31				184	13	9	10	10	8	13	10	22	14	14
PF3D7_1035400	PF3D7_1035400	P. falciparum 3D7	merozoite surface protein 3			15.4799	15.4296	15.3492	14.855	15.4459	15.825	15.5466	18.0306	17.6779	16.7081	18.7047	18.3397								21.7529	21.5176				40.119	0	1	0	7.51989	8.2779				10	1	0	0	1	1	1	0	2	0	1
PF3D7_1035500	PF3D7_1035500	P. falciparum 3D7	merozoite surface protein 6			17.7667			18.8388	17.4133	17.5984	16.1014	19.615	17.471	16.2886	17.2524	17.67				22.2407				22.6906					42.275	0	1	0	7.5851	5.141				14	1	0	1	3	1	1	0	3	1	0
PF3D7_1035700	PF3D7_1035700	P. falciparum 3D7	duffy binding-like merozoite surface protein									13.474	16.9387	17.3805		18.7213	18.9927								22.9207	22.6899		23.1033	22.3225	80.247	0	1	0	7.74432	13.21				17	1	0	0	0	0	0	0	2	5	1
PF3D7_1035900	PF3D7_1035900	P. falciparum 3D7	probable protein, unknown function						15.5147	16.0911	17.3447	14.4852	19.0419	18.4703	16.0177	17.5886	16.7429						22.283		23.5045	23.3376				65.15	0	1	0	7.79029	11.858				17	0	0	0	1	2	2	0	5	2	0
PF3D7_1036900	PF3D7_1036900	P. falciparum 3D7	conserved Plasmodium protein, unknown function			16.1934	13.1391	13.6646	12.4692	14.7531	15.3569	17.0946	17.5649	17.1757	16.7649	16.9433	18.0434		21.5641	21.893		21.5498	21.8443	22.1874	22.77	22.2753	21.7128	22.3012	22.2546	192.68	0	1	0	7.9039	34.943				35	1	0	2	1	2	1	6	6	4	5
PF3D7_1038800	PF3D7_1038800	P. falciparum 3D7	RESA-like protein with PHIST and DnaJ domains						18.5629	18.2518	18.4802				19.4513	18.4427	20.124				23.3778	23.2961	23.391				23.7077	23.5285	23.5983	107.58	1	1	0	8.13925	25.139				25	0	0	0	4	3	4	0	0	0	4
PF3D7_1039000	PF3D7_1039000	P. falciparum 3D7	serine/threonine protein kinase, FIKK family												17.3764	14.998	17.0599										21.7439			107.62	1	1	0	7.1329	12.706				2	0	0	0	0	0	0	0	0	0	2
PF3D7_1101700;PF3D7_1039700;PF3D7_0222100;PF3D7_0114100;PF3D7_0631400;PF3D7_0601200;PF3D7_0701600;PF3D7_0101300	PF3D7_1101700;PF3D7_1039700;PF3D7_0222100;PF3D7_0114100;PF3D7_0631400;PF3D7_0601200;PF3D7_0701600;PF3D7_0101300	P. falciparum 3D7	Pfmc-2TM Maurer's cleft two transmembrane protein					16.9113	18.0271	17.9461	18.9293	15.6211	17.0649	16.8408	18.6701		19.3735									19.5448				27.194	1	1	0	7.35965	2.6443				6	0	0	1	0	0	1	0	1	1	1
PF3D7_1102500	PF3D7_1102500	P. falciparum 3D7	Plasmodium exported protein (PHISTb), unknown function						18.8949	15.9496	19.2118	16.1537	16.5417		20.137	18.4896	20.5695				24.0443		23.8191				24.141	23.6431	23.3645	73.888	1	1	0	8.20011	16.239				20	0	0	0	2	2	3	0	1	0	4
PF3D7_1103100	PF3D7_1103100	P. falciparum 3D7	60S acidic ribosomal protein P1, putative			21.2329	21.4514	22.6619	21.3507	23.0745	23.5522	23.4923	24.3101	24.1946	23.417	24.002	23.9672			25.6998		25.1946	25.6209	25.9473	26.1234	26.1075	25.1984	25.6944	25.2678	13.014	0	1	0	8.89881	41.642				43	2	1	4	1	3	2	6	6	5	3
PF3D7_1103800	PF3D7_1103800	P. falciparum 3D7	CCR4-NOT transcription complex subunit 1, putative				21.5145	21.9156							21.2523	21.0083	18.4949										27.9316	26.5898		391.94	0	1	0	9.24976	3.863				7	0	1	2	0	0	0	0	0	1	1
PF3D7_1104200	PF3D7_1104200	P. falciparum 3D7	chromatin remodeling protein										12.4484												18.0246					167.44	0	1	0	5.61068	2.9696				1	0	0	0	0	0	0	0	1	0	0
PF3D7_1105000;P62805	PF3D7_1105000	P. falciparum 3D7	histone H4			26.0547	25.5225	25.8093	25.6237	25.8019	26.3595	26.0169	27.341	27.0084	26.0629	27.4234	27.4234	28.6527	28.2216	28.3828	27.8203	27.726	28.1115	28.391	29.6251	28.9977	27.4938	28.2308	28.49	11.455	0	1	1	9.84896	27.813				168	14	9	11	9	8	12	8	16	16	13
PF3D7_1105100	PF3D7_1105100	P. falciparum 3D7	histone H2B			25.6622	25.7286	25.8019	25.7441	25.7103	26.3118	25.9202	26.4457	26.2517	25.8191	26.3795	26.7518	28.5682	28.8112	28.726	28.2625	28.0965	28.3109	29.0322	28.8712	28.7581	27.8203	27.8799	28.0813	13.125	0	1	0	9.83577	40.219				114	7	8	7	8	8	10	8	11	9	10
PF3D7_1105400	PF3D7_1105400	P. falciparum 3D7	40S ribosomal protein S4, putative			16.0328	17.0246	16.3798	16.7184	17.183	17.4697	17.1395	18.5686	18.2933	19.2597	18.1065	20.2968								22.6063	22.5778	21.6514		22.1434	29.772	0	1	0	7.78117	5.0484				13	0	1	1	1	1	1	0	1	2	1
PF3D7_1107000	PF3D7_1107000	P. falciparum 3D7	U6 snRNA-associated Sm-like protein LSm4, putative			18.1043		18.3684				18.8068	20.1996	18.7711											22.3933					14.202	0	1	0	7.28131	3.1519				3	0	0	1	0	0	0	0	2	0	0
PF3D7_1107300	PF3D7_1107300	P. falciparum 3D7	polyadenylate-binding protein-interacting protein 1, putative				14.2438	13.0404	13.994	14.0283	15.9158	13.714	15.9014	15.8541	16.5326	14.2637	17.0891		21.9199		21.5082	21.0186	22.0273	21.8152	22.1638	22.2124	21.9235	21.5885	21.861	381.87	0	1	0	7.82521	26.999				37	0	3	2	2	3	3	1	5	7	5
PF3D7_1107800	PF3D7_1107800	P. falciparum 3D7	AP2 domain transcription factor, putative			14.1978	15.0253	14.0353	14.9064	14.9022	15.0293	14.0012		15.6215	14.7986	14.6905	15.7874		21.3249							21.3506				206.87	0	1	0	7.39735	6.7771				12	1	1	0	1	1	2	0	1	3	1
PF3D7_1108400	PF3D7_1108400	P. falciparum 3D7	casein kinase 2, alpha subunit										17.2704				17.0528								20.8267					39.89	0	1	0	6.7237	2.4491				2	0	0	0	0	0	0	0	1	0	0
PF3D7_1108600	PF3D7_1108600	P. falciparum 3D7	endoplasmic reticulum-resident calcium binding protein					17.4424	17.5919	19.0437	19.9948	18.2658	21.6498	20.963	20.4081	22.2486	21.2916				23.4676	23.7895	23.867	23.9316	25.3578	24.5285	23.8191	25.4862	24.0275	39.374	1	1	0	8.54107	65.393				46	0	0	1	2	3	3	0	13	4	2
PF3D7_1109900	PF3D7_1109900	P. falciparum 3D7	60S ribosomal protein L36			20.3004	20.3401					22.7619	23.0541	22.8986			22.2732							24.4614	24.0359	23.976				12.787	0	1	0	7.97306	6.6957				11	1	0	0	0	0	0	3	2	2	1
PF3D7_1110400	PF3D7_1110400	P. falciparum 3D7	RNA-binding protein, putative							13.3052	15.5437	16.3581	17.9055	17.6487	16.0749	17.5548	17.2103						22.0066	22.6643	22.9962	22.5133	22.1645	22.7162	22.7033	173.92	0	1	0	7.8415	20.425				29	0	0	0	0	2	2	2	7	6	0
PF3D7_1111500	PF3D7_1111500	P. falciparum 3D7	acylphosphatase, putative													17.6485												19.9164		15.08	0	1	0	6.2158	3.8984				3	0	0	0	0	0	0	0	0	0	0
PF3D7_1113400	PF3D7_1113400	P. falciparum 3D7	ubiquitin domain-containing protein DSK2, putative			17.3662	17.224	17.1151	16.7833	16.9837	17.8411	17.3879	16.7978	18.9449	17.1561	17.4864	17.6269									21.9383				42.706	0	1	0	7.39613	9.0609				14	1	2	1	0	1	2	2	1	2	1
PF3D7_1115600	PF3D7_1115600	P. falciparum 3D7	peptidyl-prolyl cis-trans isomerase			17.4167	16.9578	17.0193	18.9701	19.5379	20.5009	18.4135	21.0727	20.8221	17.5062		20.485				22.5194	22.7905	22.9302	23.0238	23.9847	24.1565			23.2678	21.731	0	1	0	8.11254	7.8074				25	1	0	1	1	4	3	1	5	5	2
PF3D7_1115800	PF3D7_1115800	P. falciparum 3D7	conserved Plasmodium protein, unknown function						17.8879	16.4826	18.123	13.5418	15.2318	14.8178	15.6149	17.7041	17.0032				21.8917		21.3499							33.88	1	1	0	7.34003	9.1237				10	0	0	0	1	1	4	0	0	1	1
PF3D7_1116000	PF3D7_1116000	P. falciparum 3D7	rhoptry neck protein 4									12.6725	15.273	15.3896		14.9809	12.9963								20.2497	20.4478				135.58	0	1	0	6.78455	2.8251				3	0	0	0	0	0	0	0	0	2	0
PF3D7_1116500	PF3D7_1116500	P. falciparum 3D7	folate transporter 2			17.3193	17.6691	17.5997	18.2689	17.7204	18.0482	17.4703	18.0824	17.6778	17.7191	17.5661	18.177									20.9123				51.354	0	1	0	7.55303	3.062				9	1	1	0	1	1	1	0	1	1	0
PF3D7_1116700	PF3D7_1116700	P. falciparum 3D7	dipeptidyl aminopeptidase 1			14.8686	15.8486	15.1364				16.4989	17.21	16.3549			16.4204								21.5963					80.411	0	1	0	7.2381	3.8551				7	0	0	1	0	0	0	0	2	3	0
PF3D7_1117300	PF3D7_1117300	P. falciparum 3D7	conserved Plasmodium protein, unknown function			21.7225	21.8169	21.7081	19.7366	21.9484	21.9179	21.645	20.6823	22.2157	22.2357	20.9511	21.514		24.7441	24.8093		24.4362	24.0854		23.3645	24.7543	24.1642		23.0709	15.262	0	1	0	8.49701	6.4517				20	2	1	4	1	1	3	2	1	1	2
PF3D7_1117700	PF3D7_1117700	P. falciparum 3D7	GTP-binding nuclear protein RAN/TC4			21.9785	21.4453	21.4509	21.1413	21.7552	22.0502	21.982	22.9741	23.2427	21.7127	22.5453	23.3101	25.9672	25.6096	25.824	24.867	25.2426	25.5285	25.8409	26.0711	26.533	24.5404	25.2244	25.5926	24.875	0	1	0	8.97041	125.33				63	5	2	3	1	4	5	3	6	10	5
PF3D7_1118100	PF3D7_1118100	P. falciparum 3D7	AP-1 complex subunit sigma, putative			16.9733	17.1645	17.4782	16.7946	16.8294	17.358	17.1884	17.172	17.3647												20.0687				18.234	0	1	0	7.07551	2.5526				5	1	0	1	0	1	0	0	1	0	0
PF3D7_1118300	PF3D7_1118300	P. falciparum 3D7	insulinase, putative			12.5862	12.1232	12.8599	14.4945	14.3123	14.2609	12.8327	13.8814	13.3531	16.2225	16.5291	16.1794									19.1159				173.62	0	1	0	7.4304	3.6749				7	0	0	1	0	1	0	0	1	0	1
PF3D7_1120100	PF3D7_1120100	P. falciparum 3D7	phosphoglycerate mutase, putative			19.934	19.7475	20.1046	19.5805	19.8855	20.8577	20.8136	22.3187	22.1486	19.8152	21.2578	21.9751	24.3645	24.141	24.3975	23.6865	23.8764	24.0854	24.8433	25.3975	25.4488	23.6757	24.7594	24.7645	28.77	1	1	0	8.64439	21.021				49	2	3	3	2	3	3	5	7	8	3
PF3D7_1120600	PF3D7_1120600	P. falciparum 3D7	conserved Plasmodium protein, unknown function			14.5511	14.8325	14.2424								14.4094												20.8572		303.4	0	1	0	7.13599	5.6215				5	1	0	0	0	0	1	0	0	0	0
PF3D7_1121600	PF3D7_1121600	P. falciparum 3D7	exported protein 1			20.0896	19.5512	19.769	19.2618	22.6866	22.2201	21.4919	23.3645	22.9872	22.0482	21.0613	23.2258	23.654	23.0572	23.198		23.867	23.7182	23.7286	24.945	24.5812	23.3376	22.9703	23.9043	17.295	0	1	0	8.42645	15.296				25	2	1	1	1	2	2	3	3	3	2
PF3D7_1122900	PF3D7_1122900	P. falciparum 3D7	dynein heavy chain, putative							13.9518	14.3718				18.8749		18.7966												25.4073	617.37	0	1	0	8.41142	1.9449				3	0	0	0	0	1	0	0	0	0	1
PF3D7_1124600	PF3D7_1124600	P. falciparum 3D7	ethanolamine kinase						16.2985						15.5565	18.2606	18.4545												21.5393	49.913	1	1	0	7.26593	4.732				5	0	0	0	1	0	0	0	0	0	0
PF3D7_1126200;P62269	PF3D7_1126200	P. falciparum 3D7	40S ribosomal protein S18, putative			20.6596	20.8057	20.641	20.8169	21.8557	21.2749	21.5986	22.0323	22.8524	21.5467	21.501	22.6231	23.9847	24.2021	24.3712	23.7594	24.2463	23.8481	24.4614	24.4234	25.002	23.5404	23.0041	23.9933	17.891	0	1	1	8.5141	14.418				34	2	3	2	0	4	2	4	3	7	1
PF3D7_1128000.2-p1;PF3D7_1128000	PF3D7_1128000.2-p1;PF3D7_1128000	P. falciparum 3D7	conserved Plasmodium protein, unknown function					18.4603	18.0239		18.6595	19.0995	19.5599	18.119	18.9405	19.1103	19.7413							25.3031	25.3101		24.3101	24.7129	24.7895	211.53		1	0	8.56096	3.0761				11	0	0	1	0	0	1	1	2	1	3
PF3D7_1129000	PF3D7_1129000	P. falciparum 3D7	spermidine synthase			16.8035	16.7383	16.9502	16.8483	17.1497	17.9506	16.8006	17.973	17.8354	17.4983		19.4476												22.0089	36.595	0	1	0	7.57933	4.7062				8	0	1	1	0	1	0	1	0	1	0
PF3D7_1129100	PF3D7_1129100	P. falciparum 3D7	parasitophorous vacuolar protein 1			19.2161	16.6846	19.5396	19.416	16.0732	19.4683	16.874	19.6843	17.367	18.8493	19.6098	19.3541	22.8402	22.6006	23.0631	22.693		22.3651	22.711	23.0729	22.6452	22.4892	22.6003	22.4655	51.951	1	1	0	8.03663	12.335				27	0	2	4	3	1	1	0	4	3	3
PF3D7_1129200	PF3D7_1129200	P. falciparum 3D7	26S proteasome regulatory subunit RPN7, putative									13.7497	15.4175	15.0096	16.5311	17.2716	17.7358										20.0124	21.0067	20.3413	46.624	0	1	0	7.05057	3.3938				4	0	0	0	0	0	0	0	1	0	0
PF3D7_1129900	PF3D7_1129900	P. falciparum 3D7	major facilitator superfamily-related transporter, putative						16.8747	16.7443	16.0922				16.9385	17.0486	17.2999				21.0423	20.7578								70.138	0	1	0	7.25667	4.9473				6	0	0	0	1	2	1	0	0	0	1
PF3D7_1130100	PF3D7_1130100	P. falciparum 3D7	60S ribosomal protein L38									18.2767	18.5461	19.0863			20.9421												21.0884	10.314	0	1	0	6.99189	2.2249				2	0	0	0	0	0	0	1	0	0	0
PF3D7_1130200	PF3D7_1130200	P. falciparum 3D7	60S ribosomal protein P0			18.0141	17.8299	18.2343	18.1602	18.4437	18.6916	18.9213	21.3526	21.4146	18.8524	21.4623	20.9971							23.7796	24.6209	24.8811		24.7945	23.9043	34.967	0	1	0	8.35443	16.814				21	0	0	1	1	1	1	1	3	4	1
PF3D7_1130400	PF3D7_1130400	P. falciparum 3D7	26S protease regulatory subunit 6A, putative			15.3375	14.4608					17.0189	17.8981	18.417		17.0995	17.5188								21.7311	22.2471		22.0642	21.7775	49.54	0	1	0	7.51132	5.7586				9	1	0	0	0	0	1	0	3	2	0
PF3D7_1132200	PF3D7_1132200	P. falciparum 3D7	T-complex protein 1 subunit alpha										17.524	16.9465	16.2184	15.3357	18.3867												22.0354	60.26	0	1	0	7.42085	3.3272				3	0	0	0	0	0	0	0	1	0	0
PF3D7_1132300	PF3D7_1132300	P. falciparum 3D7	nucleic acid binding protein, putative			18.1195	17.3446	17.4452	17.249	17.7283	17.8482	17.6301	18.1855	18.2784	17.7781		17.9476									21.8999				31.731	0	1	0	7.63443	2.5484				12	2	0	1	2	1	1	1	1	1	1
PF3D7_1134000	PF3D7_1134000	P. falciparum 3D7	heat shock protein 70			15.0817	14.5581	14.8144	17.3116		15.3298	17.0712	18.4977	18.2489		16.8813	17.3414							22.608	22.8871	22.8109				73.297	0	1	0	7.68945	16.329				18	0	1	0	1	0	2	0	6	4	0
PF3D7_1135100	PF3D7_1135100	P. falciparum 3D7	protein phosphatase PPM8, putative												17.4488		16.0035										21.6644			79.931	0	1	0	6.94475	2.1435				1	0	0	0	0	0	0	0	0	0	0
PF3D7_1135400	PF3D7_1135400	P. falciparum 3D7	conserved Plasmodium protein, unknown function							17.3172		16.0389	16.6111	19.3464	16.8317		18.3135									22.4622			21.6738	28.496	0	1	0	7.41355	6.635				15	1	0	1	1	1	1	0	2	4	1
PF3D7_1136300	PF3D7_1136300	P. falciparum 3D7	tudor staphylococcal nuclease									12.9712	14.589	16.5412	16.5181	17.9537	17.6635											23.2678	22.1859	128.54	0	1	0	7.64757	6.8514				7	0	0	0	0	0	0	0	1	1	1
PF3D7_1136500;PF3D7_1136500.2-p1	PF3D7_1136500;PF3D7_1136500.2-p1	P. falciparum 3D7	casein kinase 1							14.8194	15.8731	16.2262	16.6266	16.3657		15.7123	20.2801												23.0113	37.63	1	1	0	7.48011	2.5434				5	0	0	0	0	0	1	1	1	1	0
PF3D7_1138000	PF3D7_1138000	P. falciparum 3D7	conserved Plasmodium protein, unknown function			23.391	23.0296	22.8227	22.7613	23.1346	23.3376	21.4288	21.2226	22.1876	22.846	20.41	22.4902	30.4919	30.0737	29.8264	29.4214	29.5518	29.509				29.0217	27.2354	28.217	335.92	0	1	0	10.0234	4.83				24	5	3	3	2	1	0	0	1	1	4
PF3D7_1138500	PF3D7_1138500	P. falciparum 3D7	protein phosphatase PPM2				15.4621	16.192	15.8663	16.4992		15.5053	17.2189	16.2909			13.9088								21.9976					105.4	0	1	0	7.37681	9.0517				9	0	0	1	0	1	1	0	2	3	0
PF3D7_1139100	PF3D7_1139100	P. falciparum 3D7	RNA-binding protein, putative									15.7624	14.8923	16.0301			13.1065									21.7735				209.76	0	1	0	7.07802	2.0811				2	0	0	0	0	0	0	1	0	1	0
PF3D7_1140400	PF3D7_1140400	P. falciparum 3D7	conserved Plasmodium protein, unknown function			21.5447	22.0811	22.4795	20.8375	20.7939	21.5298	21.9366	22.2893	22.2318	21.8748	22.2051	23.0324	23.059	23.6971	23.9316	21.7605	21.9814	22.3555	23.6096	23.2961	23.3778	22.5181	22.7801	23.0432	18.602	0	1	0	8.18797	8.053				24	2	1	2	2	1	1	3	1	3	3
PF3D7_1142100	PF3D7_1142100	P. falciparum 3D7	conserved Plasmodium protein, unknown function			15.5653	11.8017												19.0767											324.82	0	1	0	6.87182	2.9281				1	0	0	0	0	0	0	0	1	0	0
PF3D7_1142500	PF3D7_1142500	P. falciparum 3D7	60S ribosomal protein L28			22.2685	22.5553	23.1331	22.4226	22.553	22.6756	23.6431	23.9043	23.8385	23.1501	23.2427	23.7182	25.6676	25.9066	25.9825	24.8858	24.5165	25.1449	26.4282	25.9066	26.0296	24.8904	24.5105	25.0813	14.407	0	1	0	8.90851	19.557				46	4	3	5	2	3	3	5	5	5	4
PF3D7_1142600	PF3D7_1142600	P. falciparum 3D7	60S ribosomal protein L35ae, putative			22.8199	19.9055	22.5675	19.8945	22.3276	20.1381	22.8312	23.3645	23.4425	22.2498	21.3868	22.8731	25.0894		25.3066		23.9495		25.5983	25.4266	25.433	23.9225	23.3778	24.1871	16.265	0	1	0	8.60446	5.3792				28	1	2	2	2	4	1	3	3	3	3
PF3D7_1143100	PF3D7_1143100	P. falciparum 3D7	AP2 domain transcription factor AP2-O, putative									15.2403	15.8196	15.9683	15.7385	14.378	17.0213												21.4154	186.13	0	1	0	7.32364	2.7985				4	0	0	0	0	0	0	0	0	1	0
PF3D7_1144000	PF3D7_1144000	P. falciparum 3D7	40S ribosomal protein S21			20.7748	22.0842	22.3056	20.2611	20.5876	20.6452	22.6046	22.463	22.9719	20.6195	20.5523	21.529	23.3778	24.1253	24.3778				24.6595	23.6649	24.4676				9.1454	0	1	0	8.23001	72.388				41	3	2	5	3	2	1	4	7	6	1
PF3D7_1144900	PF3D7_1144900	P. falciparum 3D7	ras-related protein Rab-6										16.8558	16.7612												20.1027				23.609	0	1	0	6.50726	2.443				2	0	0	0	0	0	0	0	0	1	0
PF3D7_1145400	PF3D7_1145400	P. falciparum 3D7	dynamin-like protein									14.3744	14.9341	15.1313												20.1572				96.373	1	1	0	6.59982	2.3092				2	0	0	0	0	0	0	0	1	1	0
PF3D7_1148000	PF3D7_1148000	P. falciparum 3D7	serine/threonine protein kinase, putative						16.4897			16.3224		15.4382										22.6271						170.7	0	1	0	7.20841	2.5825				2	0	0	0	0	0	0	1	0	0	0
PF3D7_1148700	PF3D7_1148700	P. falciparum 3D7	Plasmodium exported protein (PHISTc), unknown function												16.8149		16.9635												19.6123	43.787	1	1	0	6.61622	2.4757				2	0	0	0	0	0	0	0	0	0	1
PF3D7_1149000	PF3D7_1149000	P. falciparum 3D7	antigen 332, DBL-like protein						13.5162		14.4668		15.2485	15.6376	15.1726	15.7606	15.4347								22.5255	22.8369				689.27	1	1	0	7.75311	9.4729				13	0	0	1	1	0	1	0	2	2	2
PF3D7_1149100.2-p1;PF3D7_1149100	PF3D7_1149100.2-p1;PF3D7_1149100	P. falciparum 3D7	Plasmodium exported protein, unknown function			15.9169	14.7722	15.3694	17.0581	16.2612	16.6094	14.2288	17.1578	15.1808	18.5979	20.0718	18.7376	20.8508	19.512	20.3456	21.3747		20.2417		21.362	19.2815	22.4481	24.1642	22.1004	51.03		1	0	7.85974	59.567				23	2	1	2	3	2	1	0	2	1	2
PF3D7_1149200;PF3D7_1149500	PF3D7_1149200	P. falciparum 3D7	ring-infected erythrocyte surface antigen;ring-infected erythrocyte surface antigen 2, pseudogene						19.5806	19.5691	19.902				21.7155	20.3727	21.5787				24.7182	24.4425	24.8288				25.6264	25.217	25.1095	126.92	1	1	0	8.61122	25.495				40	0	0	0	8	8	4	0	0	0	10
PF3D7_1149600	PF3D7_1149600	P. falciparum 3D7	DnaJ protein, putative						17.726	18.0314	18.5202				17.7517							22.2833	22.4861							83.119	1	1	0	7.49638	6.7339				10	0	0	0	2	2	2	0	0	0	3
PF3D7_1200600	PF3D7_1200600	P. falciparum 3D7	erythrocyte membrane protein 1, PfEMP1						13.3756		14.7661												21.2857							355.24	1	1	0	6.81324	3.3244				2	0	0	0	0	0	2	0	0	0	0
PF3D7_1200700	PF3D7_1200700	P. falciparum 3D7	acyl-CoA synthetase						22.7862	22.672	22.9032				23.1717	22.0504	23.3376				27.3578	27.391	27.4785				27.3992	26.5898	27.2891	104.62	1	1	0	9.26644	86.425				97	0	0	0	12	13	21	0	0	0	17
PF3D7_1200800	PF3D7_1200800	P. falciparum 3D7	serine/threonine protein kinase, FIKK family							16.7066	16.2548				19.2488	16.9482	18.7448										23.2535	21.6545	21.7147	67.53	1	1	0	7.61506	13.719				10	0	0	0	0	1	0	0	0	0	4
PF3D7_1201000	PF3D7_1201000	P. falciparum 3D7	Plasmodium exported protein (PHISTb), unknown function												18.4632	17.7476	18.9169										21.8714	22.2469	21.829	77.115	1	1	0	7.42991	4.7342				4	0	0	0	0	0	0	0	0	0	1
PF3D7_1201100	PF3D7_1201100	P. falciparum 3D7	RESA-like protein with PHIST and DnaJ domains						19.6833	19.3561	19.5392				21.5596	20.496	21.701				24.8997	24.3712	24.141				25.5783	25.1984	25.239	107.63	1	1	0	8.60195	59.806				48	0	0	0	4	4	5	0	0	0	13
PF3D7_1202100	PF3D7_1202100	P. falciparum 3D7	SRAP domain-containing protein, putative							15.9379		16.207	15.9846	16.6224												20.4045				46.668	0	1	0	6.76185	6.9303				5	0	0	1	0	1	0	1	1	1	0
PF3D7_1202300	PF3D7_1202300	P. falciparum 3D7	dynein heavy chain, putative			15.4718	15.1739	15.2378	16.2012	16.9503	16.5053		13.8053	14.5365						23.5522										690.13	0	1	0	8.14993	2.2639				4	0	0	1	0	2	0	0	0	1	0
PF3D7_1202600	PF3D7_1202600	P. falciparum 3D7	conserved protein, unknown function										12.8663	12.4784												18.7806				254.29	0	1	0	6.15712	2.2063				2	0	0	0	0	0	0	1	1	0	0
PF3D7_1202700	PF3D7_1202700	P. falciparum 3D7	conserved Plasmodium protein, unknown function			21.4398		18.5255					19.9228							22.8106										49.183	0	1	0	7.90365	2.0695				9	2	0	2	1	0	0	1	0	1	1
PF3D7_1202900	PF3D7_1202900	P. falciparum 3D7	high mobility group protein B1					19.1304				19.511	23.095	22.8507			22.1215								24.48	24.3844				11.331	0	1	0	7.95245	2.534				7	0	0	1	0	0	0	1	2	2	0
PF3D7_1203700	PF3D7_1203700	P. falciparum 3D7	nucleosome assembly protein			16.0026	16.1398	17.7789	18.6864	18.9415	19.8345	19.6913	21.7954	21.7748	20.0922	20.3123	20.8052			22.0302	23.0111	23.0437	23.5754	23.4923	24.8858	25.1015	23.131	23.9225	23.3645	40.487	0	1	0	8.36696	19.623				46	0	0	2	2	1	5	2	10	10	3
PF3D7_1204300	PF3D7_1204300	P. falciparum 3D7	eukaryotic translation initiation factor 5A			20.8002	20.9868	21.1737	21.5835	20.8785	22.124	21.2487	21.4839	21.6006	21.363	21.5434	21.9848	24.1488	24.2678	24.5463	24.1332		24.4551	24.918	24.0854	24.6865				17.631	1	1	0	8.5368	5.2973				28	2	2	3	2	1	4	2	3	3	1
PF3D7_1205600	PF3D7_1205600	P. falciparum 3D7	conserved Plasmodium protein, unknown function					15.1123			17.8106	17.4652	18.643	18.5737	17.1081		18.2845							21.9392	22.3418	22.3986				39.017	0	1	0	7.5331	6.7047				14	1	0	2	0	1	1	2	2	1	1
PF3D7_1207000	PF3D7_1207000	P. falciparum 3D7	conserved Plasmodium protein, unknown function																											311.42	0	1	0	NaN	2.0208				2	1	0	0	0	1	0	0	0	0	0
PF3D7_1208200	PF3D7_1208200	P. falciparum 3D7	cysteine repeat modular protein 3			13.9738	14.3304	14.7763	13.7761	13.8888	14.9883						14.723			22.3213										418.84	0	1	0	7.44616	2.4942				5	1	0	1	1	0	1	0	0	0	0
PF3D7_1210100	PF3D7_1210100	P. falciparum 3D7	syntaxin, Qa-SNARE family										20.647	17.5896												20.931				36.847	0	1	0	7.41076	1.9891				1	1	0	0	0	0	0	0	0	0	0
PF3D7_1211400	PF3D7_1211400	P. falciparum 3D7	heat shock protein DNAJ homologue Pfj4									16.7225	19.9499	18.1621											22.3362					28.062	1	1	0	7.05362	5.5906				4	0	0	0	0	0	1	0	1	1	0
PF3D7_1365900;PF3D7_1211800	PF3D7_1365900;PF3D7_1211800	P. falciparum 3D7	polyubiquitin;ubiquitin-60S ribosomal protein L40			24.0275	21.2594	24.6971	21.3817	21.5328	21.7096	23.4298	24.6264	25.6237	23.3645	23.5522	24.0935	25.867	24.2607	26.3066	25.4394	25.4457	25.4008	25.867	25.8336	26.0484	25.2133	25.2499	25.3778	14.617	0	1	0	8.96821	20.834				29	2	2	2	1	2	2	3	2	4	1
PF3D7_1211900	PF3D7_1211900	P. falciparum 3D7	non-SERCA-type Ca2+ -transporting P-ATPase			13.9018	13.8607	14.7848	16.9638	16.1282	16.7776	14.5382	14.3042	14.4624	18.0845	17.2155	18.459				22.5482	22.4001	22.6638				22.336	22.6603	22.5278	140.26	0	1	0	7.89512	8.3992				18	0	0	1	3	1	1	1	1	1	1
PF3D7_1212000	PF3D7_1212000	P. falciparum 3D7	glutathione peroxidase-like thioredoxin peroxidase							16.8338	16.9357		17.0927	18.0771	16.8495	16.2579	18.6154									21.7282			20.7399	23.952	0	1	0	7.27527	7.765				16	0	0	1	0	3	3	0	3	3	0
PF3D7_1212700	PF3D7_1212700	P. falciparum 3D7	eukaryotic translation initiation factor 3 subunit A, putative			13.578	13.3779	13.444				13.9342	15.6143	15.118	14.5684	15.1926	16.8025								21.1323	20.7072			20.6349	166.06	0	1	0	7.24157	5.1959				9	0	0	1	0	1	0	1	2	1	0
PF3D7_1215300	PF3D7_1215300	P. falciparum 3D7	10 kDa chaperonin										18.9504	19.5821		19.3235	18.7766									22.1161				11.15	0	1	0	7.28269	1.9663				6	0	0	0	0	0	0	0	1	1	1
PF3D7_1216200	PF3D7_1216200	P. falciparum 3D7	glycerol-3-phosphate dehydrogenase, putative												15.6768		19.397												22.0458	41.233	0	1	0	7.1013	3.8398				2	0	0	0	0	0	0	0	0	0	0
PF3D7_1219100	PF3D7_1219100	P. falciparum 3D7	clathrin heavy chain, putative											13.4185												19.7207				232.95	0	1	0	6.07679	3.4472				1	0	0	0	0	0	0	0	0	1	0
PF3D7_1222300	PF3D7_1222300	P. falciparum 3D7	endoplasmin, putative			18.4141	17.6501	17.9884	19.828	19.8298	20.297	18.7735	20.8245	20.3949	20.1736	20.3955	21.5127	24.5983	24.1871	24.5105	24.7746	24.604	24.945	24.8576	25.5869	25.5783	24.3712	24.945	25.1871	95.017	0	1	0	8.7928	58.939				108	6	3	5	10	7	10	4	17	12	8
PF3D7_1223100	PF3D7_1223100	P. falciparum 3D7	cAMP-dependent protein kinase regulatory subunit			17.8446	18.4436	18.4271	18.8196	19.1067	19.9529	18.2759	19.2798	19.2762	18.4377	18.7445	19.4452	22.545	23.0509	22.894	23.0018	23.5983	23.3101	22.8667	22.9812	23.2961	23.144	23.2086	23.0545	50.832	0	1	0	8.19912	30.794				40	1	0	3	5	6	7	3	4	3	1
PF3D7_1223400	PF3D7_1223400	P. falciparum 3D7	phospholipid-transporting ATPase, putative						20.7726	21.0095	21.4059				21.8363	21.1973	21.8004				26.8385	26.6181	26.6865				27.1214	26.604	26.5898	190.44	0	1	0	9.1035	61.77				109	0	0	0	17	14	19	0	0	0	22
PF3D7_1224300	PF3D7_1224300	P. falciparum 3D7	polyadenylate-binding protein, putative			18.2933	17.6446	17.6707	17.6826	18.9875	19.205	19.2015	20.9147	20.3238	19.4537	20.6201	21.0475	24.391	23.895	23.7895	23.5045	23.5285	23.4298	24.2317	24.9933	24.4923	23.5869	24.4041	24.0935	97.229	0	1	0	8.53798	46.283				70	2	5	2	4	5	5	3	10	10	7
PF3D7_1225900	PF3D7_1225900	P. falciparum 3D7	conserved Plasmodium protein, unknown function													13.8216	13.5216												17.3683	83.928	0	1	0	6.01	2.1025				2	0	0	0	1	0	0	0	0	0	0
PF3D7_1226300	PF3D7_1226300	P. falciparum 3D7	haloacid dehalogenase-like hydrolase, putative			17.3972	16.9806	17.2162	17.5921	17.7636	18.3777	18.4011	19.4681	19.6196	18.5355	19.4593	19.857						21.8684	22.3784	22.8303	22.9725	21.9046	22.6431	22.4157	33.268	0	1	0	7.91527	9.4896				24	1	1	1	1	2	3	2	4	4	0
PF3D7_1227500	PF3D7_1227500	P. falciparum 3D7	conserved Plasmodium protein, unknown function						19.3661	19.1108	19.4554												25.5522							276.12	0	1	0	8.3928	2.2141				4	0	0	1	0	2	0	0	0	1	0
PF3D7_1228400	PF3D7_1228400	P. falciparum 3D7	conserved Plasmodium protein, unknown function									18.7861	17.2399	18.9429	19.0797	17.8102	19.1495												24.0691	168.81	0	1	0	8.3076	1.9068				1	0	0	0	0	0	0	0	0	0	1
PF3D7_1228600	PF3D7_1228600	P. falciparum 3D7	merozoite surface protein 9			19.4768	17.8671	19.4438	19.8033	20.8513	20.9454	22.3873	22.9306	22.6108	22.851	23.0757	22.996	26.1015	25.1055	26.0127	25.391	25.8904	25.9912	25.8973	27.0401	27.1015	25.632	28.1164	26.1757	86.622	1	1	0	9.24045	163.17				123	8	1	5	7	11	11	3	16	18	9
PF3D7_1228800	PF3D7_1228800	P. falciparum 3D7	WD repeat-containing protein, putative						18.1468	18.2051	18.6973	11.2435		15.584												22.2265				378.91	0	1	0	8.16888	2.194				2	0	0	0	0	0	1	0	0	1	0
PF3D7_1229300	PF3D7_1229300	P. falciparum 3D7	conserved Plasmodium protein, unknown function														15.1993												19.3456	117.48	0	1	0	6.25669	2.6447				3	0	0	0	0	0	0	0	1	0	0
PF3D7_1229400	PF3D7_1229400	P. falciparum 3D7	macrophage migration inhibitory factor			20.5228	23.5045	23.4425	23.7695	23.9584	21.6883		23.9584	23.654	24.0691	22.6425	24.1253		26.0772		25.9428	26.0547			25.8385	25.7796	25.4707	25.065	25.1681	12.844	1	1	0	8.89441	4.8628				17	0	1	2	2	2	0	0	2	2	2
PF3D7_1229500	PF3D7_1229500	P. falciparum 3D7	T-complex protein 1 subunit gamma			14.7014	14.1031	14.7104				14.2938	16.746	15.641	14.5941		17.0223								21.2961				20.7623	60.662	0	1	0	7.16906	4.5007				7	0	0	1	0	0	0	0	2	0	1
PF3D7_1232100	PF3D7_1232100	P. falciparum 3D7	60 kDa chaperonin			15.026	15.7082	15.6829	15.9529	16.1979	16.8754	16.7219	18.3017	18.3827	16.5642	16.9395	17.5755				20.9134	21.0059	21.5788	21.6501	22.3026	22.4461	21.0122	21.4344	21.7234	81.483	0	1	0	7.70634	12.51				19	1	1	1	1	1	2	1	2	4	1
PF3D7_1233600	PF3D7_1233600	P. falciparum 3D7	asparagine and aspartate rich protein 1												17.4822	17.2115	17.5375												24.0935	646.33	0	1	0	8.12678	1.911				1	0	0	0	0	0	0	0	0	0	0
PF3D7_1234100	PF3D7_1234100	P. falciparum 3D7	bromodomain protein, putative			18.0875	17.8423	17.0276	21.2597	21.1582	21.4892	17.4348	17.8728	18.0471	17.9546	17.9876	16.8848									23.976				466.01	0	1	0	9.21237	2.27				24	2	2	1	3	2	2	1	4	2	3
PF3D7_1235600	PF3D7_1235600	P. falciparum 3D7	serine hydroxymethyltransferase						16.5555	18.1266	17.0342		15.8519	15.4253			19.1735									19.7143				49.78	0	1	0	7.51456	4.3093				3	0	0	0	0	0	1	0	0	1	0
PF3D7_1236100	PF3D7_1236100	P. falciparum 3D7	clustered-asparagine-rich protein						17.3046		17.7158				16.7259	16.4307	19.3542												21.6158	51.532	0	1	0	7.20876	2.649				4	0	0	0	1	0	1	0	0	0	0
PF3D7_1237700	PF3D7_1237700	P. falciparum 3D7	conserved protein, unknown function			21.8599	22.1312	21.1759	22.1739	22.9891	23.1313	22.8362	22.679	22.9567	22.4728	20.6085	22.8605	25.9338	25.8019	25.6649	25.002	25.0443	25.1908	26.0854	25.1015	25.6595	24.5754		24.4862	23.659	0	1	0	8.84753	10.561				48	4	2	3	3	4	6	5	5	5	5
PF3D7_1238800	PF3D7_1238800	P. falciparum 3D7	acyl-CoA synthetase						16.1696	17.0595		13.4359	15.7386	15.4006	17.7286	15.7268	17.9316										20.8758	20.9338	22.058	92.091	0	1	0	7.46873	5.2527				7	0	0	0	0	1	0	0	0	1	1
PF3D7_1239800	PF3D7_1239800	P. falciparum 3D7	conserved Plasmodium protein, unknown function				10.1813		17.5486					17.6386			14.1122									25.5344				691.41	0	1	0	8.13488	5.4939				4	1	0	0	1	0	1	0	0	1	0
PF3D7_1242700	PF3D7_1242700	P. falciparum 3D7	40S ribosomal protein S17, putative							17.2713	18.4452	16.811	21.3222	21.5797		19.0684	21.7415								23.6971	23.7995			23.0581	16.067	0	1	0	7.86389	4.8374				6	0	0	0	0	0	1	0	1	2	0
PF3D7_1242800	PF3D7_1242800	P. falciparum 3D7	rab specific GDP dissociation inhibitor									16.8855	17.9306	16.2839			17.0299								21.9608					52.339	0	1	0	7.16474	4.2003				6	0	0	0	0	0	0	0	2	2	0
PF3D7_1243600	PF3D7_1243600	P. falciparum 3D7	translation initiation factor SUI1, putative						17.5871	17.3011	18.1512	18.2632	18.2749	18.1353												19.9913				12.891	0	1	0	6.89466	4.4363				3	0	0	0	0	1	1	0	0	1	0
PF3D7_1245200	PF3D7_1245200	P. falciparum 3D7	conserved Plasmodium membrane protein, unknown function														14.3855												19.0553	180.01	0	1	0	6.16932	2.1197				1	0	0	0	0	0	0	0	0	0	0
PF3D7_1245800	PF3D7_1245800	P. falciparum 3D7	epsin, putative						16.4951	16.2752	16.7058	15.9154	15.9317	15.9716												19.5057				49.718	0	1	0	6.87356	2.4866				3	0	0	0	0	1	1	1	0	0	0
PF3D7_1246200	PF3D7_1246200	P. falciparum 3D7	actin I			23.0766	23.5045	23.8481	23.4298	23.5165	23.8858	23.4298	23.9495	23.867	23.6209	23.7492	24.4862	27.7129	28.0137	28.1652	27.4938	27.1507	27.4551	27.9923	27.9031	27.9031	27.1015	27.3578	27.4234	41.87	0	1	0	9.56763	60.554				235	15	19	24	18	15	23	20	23	24	17
PF3D7_1246800	PF3D7_1246800	P. falciparum 3D7	signal recognition particle receptor, beta subunit			17.2455		18.1986	17.5938		18.7219	18.0906	18.0248	18.4593	18.2502	18.3257	18.414									21.4528				30.624	0	1	0	7.51594	1.9795				5	0	0	2	0	0	1	0	0	1	0
PF3D7_1249100	PF3D7_1249100	P. falciparum 3D7	conserved Plasmodium protein, unknown function			16.9451	15.1032	16.6014	15.6792	15.3451	17.1225	16.3551	17.3289	17.4266	15.9721	15.0901	18.0847	21.7207					21.0484		21.6897	21.6801			21.6676	44.832	0	1	0	7.57613	6.4862				11	1	1	1	0	0	2	1	1	2	0
PF3D7_1249800	PF3D7_1249800	P. falciparum 3D7	THO complex subunit 2, putative			15.2032	15.4845	15.4662					15.3293	15.6366												22.3203				348.67	0	1	0	7.49658	3.2874				7	1	1	1	1	0	0	1	1	1	0
PF3D7_1250100	PF3D7_1250100	P. falciparum 3D7	osmiophilic body protein G377									17.9148	14.492	17.5137												24.317				377.38	1	1	0	7.8477	2.5667				6	0	0	0	0	1	0	0	3	1	1
PF3D7_1251200	PF3D7_1251200	P. falciparum 3D7	coronin						15.1456	17.3646	15.5705			14.8347			15.8285					21.6038								69.014	0	1	0	6.99525	6.0291				6	0	0	0	0	2	1	0	0	1	0
PF3D7_1252100	PF3D7_1252100	P. falciparum 3D7	rhoptry neck protein 3			16.3279	15.5047	15.984	16.8977	16.9452	17.799	16.8665	18.1407	17.6602	16.4955	17.2803	18.2453	23.8093	23.3101	23.654	23.4425	23.654	23.5869	23.5285	24.0854	23.7796	23.109	24.1015	23.8191	263.15	0	1	0	8.39051	37.553				61	4	0	3	4	4	10	3	7	10	2
PF3D7_1253400;PF3D7_1479000;PF3D7_0301000	PF3D7_1253400	P. falciparum 3D7	acyl-CoA synthetase						19.4026	19.5795	19.6739				23.6096	21.7568	23.8191				25.3031	25.1332	24.9716				27.632	26.632	27.2077	93.865	1	1	0	9.09304	62.669				68	0	0	0	5	6	8	0	0	0	17
PF3D7_1301400	PF3D7_1301400	P. falciparum 3D7	Plasmodium exported protein (hyp12), unknown function						20.9744	20.7748	21.3127				22.9993	22.2785	23.222				24.654	24.4923	24.4551				25.5667	24.6486	25.48	46.025	1	1	0	8.58692	88.614				31	0	0	0	5	4	2	0	0	0	7
PF3D7_1301600	PF3D7_1301600	P. falciparum 3D7	erythrocyte binding antigen-140			17.1819	17.5191	18.0459												24.0854										140.59	0	1	0	7.58947	1.9511				2	1	0	0	0	0	0	0	0	0	1
PF3D7_1301700	PF3D7_1301700	P. falciparum 3D7	CX3CL1-binding protein 2			19.1971	19.5342	19.5181	22.1642	22.0466	22.6823	19.0459	20.219	20.6445	21.2955	20.6604	22.0772				25.2856	24.8576	24.9584				23.895	23.4298	24.317	28.255	1	1	0	8.51751	14.575				26	2	1	2	2	2	4	2	1	2	3
PF3D7_1302000	PF3D7_1302000	P. falciparum 3D7	EMP1-trafficking protein				15.9976	16.5862	19.4746	18.6586	19.6423		17.8016	17.3057		18.182					22.6892									36.532	1	1	0	7.56301	21.679				10	0	1	0	2	0	2	0	1	1	0
PF3D7_1302800	PF3D7_1302800	P. falciparum 3D7	40S ribosomal protein S7, putative			19.1241	19.2827	19.4161	17.4267	17.4604	17.9934	19.4339	19.975	19.9192	19.9526	19.5492	21.3064										22.4228		23.1301	22.48	0	1	0	7.9837	3.8971				7	0	0	1	0	0	1	1	1	1	0
PF3D7_1304500	PF3D7_1304500	P. falciparum 3D7	small heat shock protein, putative																											25.195	0	1	0	NaN	2.0391				2	0	0	0	0	0	0	0	0	2	0
PF3D7_1306400	PF3D7_1306400	P. falciparum 3D7	26S protease regulatory subunit 10B, putative														17.0334												19.9869	44.677	0	1	0	6.44979	2.6432				1	0	0	0	0	0	0	0	0	0	0
PF3D7_1307200	PF3D7_1307200	P. falciparum 3D7	DnaJ protein, putative						19.4472	19.3125	19.985				21.2516	20.2441	21.2693												23.6431	38.912	0	1	0	8.08415	3.4019				4	0	0	0	1	0	1	0	0	0	0
PF3D7_1308200	PF3D7_1308200	P. falciparum 3D7	carbamoyl phosphate synthetase						14.1894		15.1969	12.5128	16.2624	15.5976			14.8341								22.3279	22.0478				273.43	0	1	0	7.38281	8.3899				14	0	0	1	1	0	2	2	3	2	1
PF3D7_1308300	PF3D7_1308300	P. falciparum 3D7	40S ribosomal protein S27			21.8963	21.9867	21.8212	19.7168		21.2314	22.3144	23.0674	22.931	22.4805	22.4863	21.9564									24.0526				9.1418	0	1	0	8.20047	2.946				15	2	2	2	2	0	1	0	1	1	2
PF3D7_1309100	PF3D7_1309100	P. falciparum 3D7	60S ribosomal protein L24, putative			20.709	20.8965	20.9433	21.1792	20.7901	21.6234	20.0654	21.888	22.0003	21.1448	21.1783	21.896	23.1726	23.4676	23.4298	23.3645	22.9086	23.48	23.6865	23.5522	23.8576				19.245	0	1	0	8.26766	3.6416				18	2	2	2	1	2	2	1	2	1	1
PF3D7_1310500	PF3D7_1310500	P. falciparum 3D7	conserved protein, unknown function										17.569	17.8443		17.3213	17.8935									20.9632				24.413	1	1	0	7.00191	3.6076				5	0	0	0	0	0	0	1	0	2	0
PF3D7_1310700	PF3D7_1310700	P. falciparum 3D7	RNA-binding protein, putative			18.778	19.026	18.6224				18.3496	19.9102	19.4656	17.9798	18.8673	18.9884									21.5846				16.526	0	1	0	7.44905	2.4801				6	1	1	0	0	0	0	1	1	1	0
PF3D7_1311500	PF3D7_1311500	P. falciparum 3D7	26S protease regulatory subunit 7, putative			14.2012	14.0963	13.9736				14.1613	16.8504	15.0032	16.1158		17.2651								21.1363				20.6271	46.835	0	1	0	7.11588	4.1339				7	0	0	1	0	0	0	1	1	1	0
PF3D7_1311800	PF3D7_1311800	P. falciparum 3D7	M1-family alanyl aminopeptidase			17.1747	17.7411	17.9304	16.6825	17.3015	18.6547	18.4804	19.7927	20.1508	19.4731	19.6246	20.5401	24.1253	24.275	24.3844	23.5869	23.9316	24.2678	24.48	25.2317	25.1681	24.1871	24.7543	24.9672	126.06	0	1	0	8.66471	55.135				90	4	5	6	1	2	6	6	18	11	5
PF3D7_1311900	PF3D7_1311900	P. falciparum 3D7	V-type proton ATPase catalytic subunit A									16.2887	16.8325	16.8303	16.2356		17.7821												21.5133	68.576	0	1	0	7.34577	4.2959				6	0	0	0	1	0	0	1	0	0	1
PF3D7_1312900	PF3D7_1312900	P. falciparum 3D7	eukaryotic translation initation factor 4 gamma			12.6785	13.5816	13.6294	15.4836	15.7123	15.566		16.15	15.5683	16.7937	16.9801	17.6308		21.0469	20.3218	21.1061	21.1191	20.7185		21.7259	21.3571	21.1456	22.3435	21.0392	146.65	0	1	0	7.66551	13.715				26	1	0	1	2	2	3	1	3	2	5
PF3D7_1314500	PF3D7_1314500	P. falciparum 3D7	cop-coated vesicle membrane protein p24 precursor, putative					17.4009		17.9089	17.9501		17.7385	18.5603												21.0944				24.442	0	1	0	7.00949	3.0844				5	0	0	1	1	0	1	0	1	1	0
PF3D7_1317800	PF3D7_1317800	P. falciparum 3D7	40S ribosomal protein S19			18.3179	18.5378	18.2457	20.7828	20.8527	20.9951	18.465	19.9678	19.3531	21.1257	20.9631	22.2073				23.0646	23.0368	22.9075				22.956	23.0932	23.5165	16.763	0	1	0	8.10127	31.671				18	1	1	2	1	1	2	2	1	1	1
PF3D7_1320600	PF3D7_1320600	P. falciparum 3D7	ras-related protein Rab-11A						16.3636		17.556		17.6807			18.4072	18.8797											21.3573	21.1626	24.752	0	1	0	7.23355	3.4394				5	0	0	0	0	0	1	0	1	1	0
PF3D7_1321500.2-p1;PF3D7_1321500	PF3D7_1321500.2-p1;PF3D7_1321500	P. falciparum 3D7	3',5'-cyclic nucleotide phosphodiesterase, putative			14.1778										14.8915												19.8598		133.2		1	0	6.40555	3.0757				3	0	0	0	0	0	0	0	0	0	0
PF3D7_1323100	PF3D7_1323100	P. falciparum 3D7	60S ribosomal protein L6, putative				19.6786	19.771	19.1566	19.7521		18.6085	19.1168	18.3494	17.5494	19.5214	19.5901												21.4733	21.601	0	1	0	7.79498	3.4032				5	0	0	1	0	1	0	0	1	0	1
PF3D7_1323200	PF3D7_1323200	P. falciparum 3D7	V-type proton ATPase subunit G, putative									16.7136	19.4493	19.1428		21.1243									21.4185	21.2643				14.192	1	1	0	7.34494	4.1563				3	0	0	0	0	0	0	0	0	2	0
PF3D7_1323400	PF3D7_1323400	P. falciparum 3D7	60S ribosomal protein L23			21.0271	21.2805	21.53	21.885	21.4709	22.301	21.8679	22.039	21.9404	22.4937	20.7839	23.0094	23.7695	24.019	24.2463	23.867	23.5045	24.002	24.3712	24.0105	23.9933	23.9672	23.391	24.0443	22.092	0	1	0	8.45917	83.973				41	3	2	3	5	4	4	4	5	3	4
PF3D7_1324900	PF3D7_1324900	P. falciparum 3D7	L-lactate dehydrogenase			24.7895	24.7945	24.7796	24.989	25.1833	25.6971	24.7895	25.3135	25.9517	25.0567	24.9271	25.5812	28.0453	28.4862	28.4938	28.0401	28.4032	28.2847	28.1652	28.3196	28.6181	27.7453	28.6424	27.9923	34.107	0	1	0	9.74706	42.459				119	7	7	8	10	13	13	7	11	12	10
PF3D7_1325400	PF3D7_1325400	P. falciparum 3D7	conserved Plasmodium protein, unknown function			14.7232	12.9729	12.8881										22.0982												419.08	0	1	0	6.8502	2.0121				1	0	0	1	0	0	0	0	0	0	0
PF3D7_1325800	PF3D7_1325800	P. falciparum 3D7	conserved Plasmodium protein, unknown function												14.7982	16.0516	16.271												20.8767	185.69	0	1	0	7.06382	2.0252				1	0	0	0	0	0	0	0	0	0	0
PF3D7_1327500	PF3D7_1327500	P. falciparum 3D7	conserved Plasmodium protein, unknown function						18.4483	18.2918	18.6169	18.3229	15.3334	15.0863	18.3694	17.6966	18.6607									20.3208				103.09	0	1	0	8.10517	2.1819				6	0	0	0	2	0	0	1	1	1	0
PF3D7_1330800	PF3D7_1330800	P. falciparum 3D7	RNA-binding protein, putative			20.9491	21.057	21.7968	21.1377	21.1571	21.4634	22.2271	22.027	22.377	21.2245	20.259	21.4787	25.6513	25.5725	26.1527	25.1293	24.9539	25.0935	26.3494	25.8811	26.0691	24.8904	24.7995	24.5983	68.009	0	1	0	8.88622	41.78				85	6	6	6	9	5	8	10	10	7	7
PF3D7_1331700	PF3D7_1331700	P. falciparum 3D7	glutamine--tRNA ligase, putative									15.1596	15.9863	15.8182	13.3291	14.159	15.864								20.9375	21.0158				108.53	0	1	0	7.08379	3.4656				4	0	0	0	0	0	0	0	1	1	0
PF3D7_1331800	PF3D7_1331800	P. falciparum 3D7	60S ribosomal protein L23, putative			17.164	18.0225	17.1834				18.0706	18.2928			18.1103	18.3789			20.2206										14.993	0	1	0	7.15406	2.8754				9	1	1	1	0	0	0	0	1	0	0
PF3D7_1332900	PF3D7_1332900	P. falciparum 3D7	isoleucine--tRNA ligase, putative				14.5231	15.8442	15.7437	15.4367	15.5387	16.6372	17.5008	18.1346	16.2198		18.0084				22.6844			22.4582	22.7759	22.7498	22.4983		23.1187	151.31	0	1	0	7.89107	10.218				18	0	1	1	1	1	1	1	2	5	1
PF3D7_1334500	PF3D7_1334500	P. falciparum 3D7	MSP7-like protein						19.5121	18.752	18.9622				21.5195	19.7162	21.8183				23.9043	23.7077	23.6209				25.0935	24.239	24.7945	70.66	1	1	0	8.41402	44.65				41	0	0	0	6	2	4	0	0	0	9
PF3D7_1335100	PF3D7_1335100	P. falciparum 3D7	merozoite surface protein 7						18.7757	19.2482	19.307	18.8665	21.5188	21.1263	20.4107	22.1287	21.6375								24.9089	25.1488	24.0691	25.239	24.4984	41.276	0	1	0	8.47887	19.782				27	0	0	0	2	2	2	2	4	3	3
PF3D7_1337300	PF3D7_1337300	P. falciparum 3D7	exoribonuclease, putative						15.364	16.3235	16.7326												21.3751							106.77	0	1	0	7.03028	2.5322				1	0	0	0	0	0	1	0	0	0	0
PF3D7_1338200	PF3D7_1338200	P. falciparum 3D7	60S ribosomal protein L6-2, putative			21.7412	20.7813	21.5748	21.4434	22.1784	22.1334	21.4469	22.4486	22.5383	21.9909	21.5489	22.6398	24.9043	24.9803	24.824	24.4488	24.5638	24.2535	25.3443	25.002	25.3578	24.019	24.3307	24.2463	25.532	0	1	0	8.69086	16.447				47	4	3	3	3	5	5	2	6	4	4
PF3D7_1338300	PF3D7_1338300	P. falciparum 3D7	elongation factor 1-gamma, putative			19.3107	18.9092	19.0287	20.6788	21.4116	21.0044	20.1743	21.092	21.6402	20.5904	19.9145	21.6448	24.824	24.4984	24.4984	24.0772	24.4234	24.141	24.4234	24.9628	25.0894	23.7182	24.4551	24.3975	47.777	0	1	0	8.6399	17.602				50	3	3	4	2	6	6	2	5	7	2
PF3D7_1341200	PF3D7_1341200	P. falciparum 3D7	60S ribosomal protein L18, putative			18.9862	18.7768	18.7531	19.5074	19.4337	19.4811	19.3934	19.9973	20.3094	20.0815	18.7583	20.6846							22.5356	22.407	22.6436	22.2268		22.3471	21.746	0	1	0	7.89733	4.842				12	1	1	0	1	1	0	1	1	2	1
PF3D7_1341900	PF3D7_1341900	P. falciparum 3D7	V-type proton ATPase subunit D, putative									15.2302	16.6933	16.3897											19.9631	19.8563				27.801	0	1	0	6.53832	2.3533				2	0	0	0	0	0	0	0	1	1	0
PF3D7_1342000	PF3D7_1342000	P. falciparum 3D7	40S ribosomal protein S6			18.4363	17.5359	18.2411	18.7815	19.0331	18.4983	18.549	19.5701	18.5363		19.0566	20.2386								22.2187			21.9631	21.9185	35.384	0	1	0	7.74323	6.1026				12	0	1	0	1	1	1	2	3	1	0
PF3D7_1342900	PF3D7_1342900	P. falciparum 3D7	AP2 domain transcription factor, putative																											455.99	0	1	0	NaN	1.9256				2	1	0	0	0	0	1	0	0	0	0
PF3D7_1343000	PF3D7_1343000	P. falciparum 3D7	phosphoethanolamine N-methyltransferase			23.2365	23.0318	23.4923	23.6431	23.7995	24.867	23.2313	24.3511	24.1565	24.9089	25.1908	25.632	27.189	27.2354	27.4473	27.189	27.1214	27.5536	27.509	27.7195	27.7771	27.1984	27.5463	27.5463	31.043	0	1	0	9.56184	161.22				171	10	8	10	12	13	14	10	15	12	14
PF3D7_1344200	PF3D7_1344200	P. falciparum 3D7	heat shock protein 110, putative						14.2377	14.6515	15.0998	14.2748	17.9595	16.9647			17.1587								22.67	22.4987			22.0395	108.18	0	1	0	7.53111	9.2749				15	0	0	0	0	0	1	1	5	3	0
PF3D7_1346300	PF3D7_1346300	P. falciparum 3D7	DNA/RNA-binding protein Alba 2						17.5765	17.5579		19.9565	21.3977	21.714	20.4336	20.8721	22.3487							23.7594	23.9672	24.2244		23.8576		24.984	0	1	0	8.21179	10.247				16	0	0	1	0	1	0	1	4	1	1
PF3D7_1347500	PF3D7_1347500	P. falciparum 3D7	DNA/RNA-binding protein Alba 4			20.1089	20.8685	21.2702	21.1716	21.505	21.3881	21.7591	22.2552	22.2949	21.9962	21.7112	22.6518	24.8433	25.3376	25.0608	24.7645	24.895	24.895	25.5225	25.4202	25.4738	24.7129	24.6757	24.9847	42.159	0	1	0	8.79481	34.624				55	2	4	5	5	4	4	4	3	5	5
PF3D7_1349200	PF3D7_1349200	P. falciparum 3D7	glutamate--tRNA ligase, putative												18.1845	17.9007	18.529											22.7232		101.42	0	1	0	7.63629	3.2669				1	0	0	0	0	0	0	0	0	0	0
PF3D7_1351200	PF3D7_1351200	P. falciparum 3D7	conserved Plasmodium protein, unknown function			14.6503	15.7142	15.9646												22.2685										186.32	0	1	0	7.04309	1.9905				2	0	0	1	0	0	0	0	0	0	0
PF3D7_1351400	PF3D7_1351400	P. falciparum 3D7	60S ribosomal protein L17, putative			20.6446	20.389	20.1729	20.8488	21.0155	20.9165	20.3141	20.7611	20.8908	21.1977	21.112	21.729	23.6971	23.7895	23.7077	23.4676	23.5638	23.391	23.6096	23.9043	24.0105	23.5869	23.632	23.5285	23.414	0	1	0	8.36836	12.404				45	3	3	3	4	4	2	3	5	4	4
PF3D7_1353100	PF3D7_1353100	P. falciparum 3D7	Plasmodium exported protein, unknown function									15.682	18.9491	19.0678	17.4148	18.2601	18.7552										20.3774	21.4434	21.2079	32.783	1	1	0	7.48558	6.2869				8	0	0	0	0	0	0	1	1	1	2
PF3D7_1353300	PF3D7_1353300	P. falciparum 3D7	conserved Plasmodium protein, unknown function														13.4717												18.8011	248.26	0	1	0	6.09283	3.2471				2	0	0	0	0	0	0	0	0	0	1
PF3D7_1357100;PF3D7_1357000	PF3D7_1357100;PF3D7_1357000	P. falciparum 3D7	elongation factor 1-alpha			23.2961	22.9011	23.6431	23.7077	24.3578	24.7182	24.1095	25.1565	25.1449	24.019	23.8288	25.0526	28.4433	28.4154	28.579	27.9484	28.1937	28.4234	28.8355	28.8203	29.2602	27.9869	27.5609	28.4746	48.958	0	1	0	9.83474	163.64				281	15	14	21	16	20	23	21	34	34	25
PF3D7_1357800	PF3D7_1357800	P. falciparum 3D7	T-complex protein 1 subunit delta									16.2049	17.1078	17.0512	16.1422		16.9093									21.5395				57.977	0	1	0	7.23014	4.4216				4	0	0	0	0	0	0	0	1	0	0
PF3D7_1357900	PF3D7_1357900	P. falciparum 3D7	pyrroline-5-carboxylate reductase													17.138												20.4059		28.379	0	1	0	6.36318	2.1771				2	0	0	0	0	0	0	0	0	0	0
PF3D7_1358800	PF3D7_1358800	P. falciparum 3D7	40S ribosomal protein S15			22.7736	22.0415	22.9516	22.5246	22.3659	22.4966	23.1774	22.7077	23.6431	22.3024	21.7904	22.6355	25.4457	25.5374	25.6181	25.3844	24.8904	25.3975	25.965	25.2244	25.6292	24.5812	24.6153	24.6971	17.25	1	1	0	8.81541	11.916				43	5	2	5	4	3	3	6	3	7	2
PF3D7_1359400	PF3D7_1359400	P. falciparum 3D7	CUGBP Elav-like family member 1			16.1891	15.3025	15.6756	15.5659	15.3624	16.2834	15.7053	17.709	17.359	15.8629	15.7208	17.4581								21.5428	21.2192				57.114	0	1	0	7.3505	5.0141				11	0	1	1	0	1	0	0	2	2	1
PF3D7_1360800	PF3D7_1360800	P. falciparum 3D7	falcilysin				14.1748	14.1463				14.8443	15.9929	15.5648	14.301	13.5006	16.3687								21.4088				20.9424	138.86	0	1	0	7.28439	4.4942				9	0	0	1	1	0	0	1	2	2	0
PF3D7_1360900	PF3D7_1360900	P. falciparum 3D7	polyadenylate-binding protein, putative				15.5852	16.1131		13.9937	15.8622	15.9332	16.9044	16.3171	15.6781	17.8253	19.1406											21.5074	21.8292	44.813	0	1	0	7.40111	2.6303				11	0	1	1	0	0	1	1	1	1	1
PF3D7_1361200	PF3D7_1361200	P. falciparum 3D7	conserved Plasmodium protein, unknown function									16.6709	16.5046												22.3339					210.16	0	1	0	7.23469	2.0887				2	0	0	0	0	0	0	1	0	0	1
PF3D7_1361800	PF3D7_1361800	P. falciparum 3D7	glideosome-associated connector						13.4673	13.1096	13.5186		13.2094	12.7309												19.2761				291.02	0	1	0	6.79337	5.9264				8	1	0	0	1	1	2	0	1	1	0
PF3D7_1361900	PF3D7_1361900	P. falciparum 3D7	proliferating cell nuclear antigen 1									18.5983	18.7351	19.1875		18.8315										22.7215				30.586	0	1	0	7.48213	3.5424				4	0	0	0	0	0	0	0	1	2	0
PF3D7_1366300	PF3D7_1366300	P. falciparum 3D7	conserved Plasmodium protein, unknown function			13.421						16.0032	16.0177	16.7851	12.2382	12.9916	13.0354									23.9225				494.68	0	1	0	7.73073	3.3826				6	1	1	0	1	1	0	0	0	1	1
PF3D7_1366500	PF3D7_1366500	P. falciparum 3D7	nucleoside diphosphate kinase			19.4042	19.5716	18.6055	20.6543	21.0591	20.9087	19.3731	20.4954	20.2137	18.5425		19.8121		23.4923		23.2961	23.2961	23.1323	22.9662	23.2407	23.2156			22.2078	17.012	0	1	0	8.0917	21.365				23	1	3	1	2	4	3	0	2	3	1
PF3D7_1366900	PF3D7_1366900	P. falciparum 3D7	conserved Plasmodium protein, unknown function			19.2115	22.2185	22.2686				25.5667	17.0425	19.8422			17.2824							29.3536	27.7581	29.2759				78.573	0	1	0	9.25122	28.793				12	0	1	2	0	0	0	1	4	2	0
PF3D7_1367700	PF3D7_1367700	P. falciparum 3D7	alanine--tRNA ligase						12.2388	11.7811	11.677	11.3692	13.9741	13.96			13.018								19.6852	19.6296				165.13	0	1	0	6.61222	2.8384				4	0	0	0	1	0	0	0	0	2	0
PF3D7_1368200	PF3D7_1368200	P. falciparum 3D7	ABC transporter E family member 1, putative						13.3558	13.5415	13.9826	12.9985	14.3844	13.4974	13.6338	14.6103	14.5474									18.0313				70.269	0	1	0	6.65558	3.3274				5	0	0	0	1	1	0	0	1	1	0
PF3D7_1370300	PF3D7_1370300	P. falciparum 3D7	membrane associated histidine-rich protein										19.7502	20.3395	19.5287	20.5011	20.6633									22.8736				28.949	1	1	0	7.6891	8.3625				13	0	0	0	0	0	1	0	2	2	1
PF3D7_1371800	PF3D7_1371800	P. falciparum 3D7	Plasmodium exported protein, unknown function												18.4114		18.2434												20.7116	53.391	1	1	0	6.99496	4.6136				2	0	0	0	0	0	0	0	0	0	1
PF3D7_1371900	PF3D7_1371900	P. falciparum 3D7	Plasmodium exported protein, unknown function						18.672	18.4889	18.7101				22.3822	21.361	22.0196										24.2961	23.8191	23.6757	23.642	1	1	0	8.08863	6.3604				11	0	0	0	1	1	1	0	0	0	3
PF3D7_1372400	PF3D7_1372400	P. falciparum 3D7	acyl-CoA synthetase												13.1285	17.3833	17.8881											22.2279	21.6806	99.089	0	1	0	7.25928	3.5056				2	0	0	0	0	0	0	0	0	0	0
PF3D7_1401200	PF3D7_1401200	P. falciparum 3D7	Plasmodium exported protein, unknown function						21.5401	21.6621	22.1913				24.9539	23.3778	25.2244				25.2244	25.0233	25.3612				27.4629	26.2535	27.4473	31.285	1	1	0	9.08622	15.499				62	0	0	0	7	6	10	0	0	0	19
PF3D7_1401300	PF3D7_1401300	P. falciparum 3D7	epoxide hydrolase 2												18.1896		18.1238										21.9357			55.198	1	1	0	7.18184	6.7088				6	0	0	0	0	0	0	0	0	0	3
PF3D7_1401600	PF3D7_1401600	P. falciparum 3D7	Plasmodium exported protein (PHISTb), unknown function			16.5261			17.4632	16.9635	17.8975	16.3183	18.869	18.1776	16.7823	17.8736	19.6639								22.5724	22.5464		22.4974	22.3107	55.826	1	1	0	7.80957	7.8034				15	1	0	0	0	1	2	0	3	2	0
PF3D7_1402300	PF3D7_1402300	P. falciparum 3D7	26S proteasome regulatory subunit RPN6			16.0325	16.45						17.0643	16.8868												21.5501				78.38	0	1	0	7.16188	2.2007				4	1	0	0	0	0	1	0	1	1	0
PF3D7_1405600	PF3D7_1405600	P. falciparum 3D7	ribonucleoside-diphosphate reductase small chain, putative			15.9827	16.4368	16.2904	16.6039	16.9783	17.4287	16.2132	16.8588	17.7499	17.2242	16.4712	17.6902									21.6059				40.599	0	1	0	7.47985	10.366				13	1	1	1	1	1	1	1	1	2	1
PF3D7_1407800	PF3D7_1407800	P. falciparum 3D7	plasmepsin IV						17.7491	18.6754	18.3736	18.3	20.4243	20.0267	19.3835	20.5886	20.4531				22.1658	22.8401	22.5729	22.5685	23.4676	23.417	22.5508	24.4234	23.1006	51.046	0	1	0	8.15223	44.842				22	0	0	0	0	1	2	0	2	7	1
PF3D7_1407900	PF3D7_1407900	P. falciparum 3D7	plasmepsin I										18.0362	15.6494											21.882					51.46	0	1	0	6.84784	3.5694				4	0	0	0	0	0	0	0	1	1	0
PF3D7_1408000	PF3D7_1408000	P. falciparum 3D7	plasmepsin II						16.7841	17.9067	17.6703	16.3515	19.4556	19.2777	17.6931	19.3752	19.9056					22.1488	21.6646		23.0706	23.1845	21.656	22.8435	22.6593	51.48	0	1	0	7.91099	6.3477				21	0	0	0	1	2	2	1	2	4	1
PF3D7_1408600;P62241	PF3D7_1408600	P. falciparum 3D7	40S ribosomal protein S8e, putative			19.5194	19.5375	19.8487	20.3483	20.7641	20.5785	20.0047	22.1869	22.4417	20.4933	21.2939	22.609				23.4425	23.6096	23.1602		24.239	24.2317		23.417	23.7895	25.051	0	1	1	8.30908	10.457				30	2	1	2	2	2	2	1	4	4	1
PF3D7_1409400	PF3D7_1409400	P. falciparum 3D7	conserved Plasmodium membrane protein, unknown function			20.2281	20.2375	20.418	20.4984	20.43	20.4072	20.0693	20.2441	20.0055	20.3323	19.9582	20.8263	23.5404	23.654	23.7077	23.4298	23.2678		23.5522	23.1411	22.9506	22.8416	22.7711	22.8835	30.538	0	1	0	8.23847	12.686				29	1	3	4	4	2	3	2	2	2	3
PF3D7_1409600	PF3D7_1409600	P. falciparum 3D7	conserved Plasmodium protein, unknown function												14.8587												19.0337			92.747	0	1	0	6.01699	3.9064				4	0	0	0	0	0	0	0	0	0	1
PF3D7_1410400	PF3D7_1410400	P. falciparum 3D7	rhoptry-associated protein 1			20.7788	20.1794	20.5124	20.2037	20.6862	20.9972	20.631	22.0511	22.0817	21.2701	22.0397	22.7683	26.2874	25.8409	25.965	25.8093	25.9977	26.1488	26.0041	26.6181	26.5389	25.5404	26.5754	26.4378	90.052	0	1	0	9.15296	96.345				153	11	5	9	8	11	14	8	19	19	12
PF3D7_1410600	PF3D7_1410600	P. falciparum 3D7	eukaryotic translation initiation factor 2 subunit gamma, putative			17.8402	18.128	17.8777	17.7158	18.0034	18.5174	17.6116	18.5333	18.4624		17.7252	18.4828	22.5164	22.7365	22.411		21.5113		22.005	22.2915	22.5657				51.244	0	1	0	7.83923	10.291				16	1	1	2	1	2	1	2	1	1	1
PF3D7_1410700	PF3D7_1410700	P. falciparum 3D7	conserved Plasmodium protein, unknown function			15.8878	15.8336	16.1052	15.6745	15.2041	15.8906	16.2887	16.4134	16.5802	15.9019		16.7138									20.3621				39.831	0	1	0	7.1677	1.931				5	0	0	1	0	1	0	1	0	1	1
PF3D7_1412300	PF3D7_1412300	P. falciparum 3D7	nuclear transport factor 2, putative			20.4641	20.3192	19.933	21.2531	22.0134	21.4535	18.2282	20.0752	21.1265	21.8559	19.7126	20.9104	24.0275	23.2172	22.6675	23.8191	24.1642	23.5404			23.7182	23.8191		22.694	14.438	0	1	0	8.27761	14.186				18	1	2	2	2	1	2	0	0	3	2
PF3D7_1412500	PF3D7_1412500	P. falciparum 3D7	actin II				17.933				18.1947	17.2767	18.546	17.0559	17.6269	18.5941												22.2543		42.605	0	1	0	7.58375	8.7952				7	0	1	0	0	0	1	1	1	0	1
PF3D7_1412800	PF3D7_1412800	P. falciparum 3D7	glycylpeptide N-tetradecanoyltransferase			16.87	17.1089	17.3683	17.2002	16.5002	17.4902				16.6972	19.0953	17.4554			21.9904										47.97	0	1	0	7.61163	4.2899				6	0	1	1	1	0	0	0	0	0	1
PF3D7_1414000	PF3D7_1414000	P. falciparum 3D7	26S proteasome regulatory subunit RPN13, putative									14.9121	18.3926	17.7764			17.862								21.0701	20.6737				29.487	0	1	0	6.92308	2.9605				4	0	0	0	0	0	0	0	0	3	0
PF3D7_1417800	PF3D7_1417800	P. falciparum 3D7	DNA replication licensing factor MCM2									12.4859	15.2611	14.713											20.4273	20.0304				111.5	0	1	0	6.59686	3.4847				3	0	0	0	0	0	0	0	1	2	0
PF3D7_1419200	PF3D7_1419200	P. falciparum 3D7	thioredoxin-like protein, putative			13.6599	14.2796	14.3046												19.3862										80.238	0	1	0	6.24334	3.1457				2	0	0	1	0	0	0	0	1	0	0
PF3D7_1420700	PF3D7_1420700	P. falciparum 3D7	surface protein P113									14.5515	17.2647	16.9119											21.9099	22.1668				112.57	0	1	0	7.13723	12.396				7	0	0	0	0	0	0	0	3	3	0
PF3D7_1421200	PF3D7_1421200	P. falciparum 3D7	40S ribosomal protein S25			20.7441	20.6862	21.0083	20.6461	20.41	21.1794	21.0489	21.304	21.682	20.8006	20.3345	21.8259	23.1129	23.2678	23.654	22.6776	22.3848	22.9315	23.8093	23.3239	23.8385			23.066	11.664	0	1	0	8.19232	4.7493				21	0	1	2	0	0	3	3	3	4	2
PF3D7_1423700	PF3D7_1423700	P. falciparum 3D7	conserved Plasmodium protein, unknown function				14.0323	12.8852	14.7869	15.1004		15.7769	18.9287	16.5295	15.2741		15.885							23.0388	23.0131	23.2821				183.57	0	1	0	7.7012	10.232				14	0	1	1	1	1	0	0	4	3	1
PF3D7_1424100	PF3D7_1424100	P. falciparum 3D7	60S ribosomal protein L5, putative			19.7867	20.3166	21.0761	20.8493	20.7895	21.83	20.7697	22.2453	22.325	21.4993	20.7228	22.9418	24.4234	24.5522	24.9225	24.1565	24.0105	24.7695	25.3712	24.9933	25.3443	24.3101	24.0772	24.6811	33.998	0	1	0	8.7098	14.84				37	1	1	4	1	5	2	4	5	5	4
PF3D7_1424400	PF3D7_1424400	P. falciparum 3D7	60S ribosomal protein L7-3, putative			19.5321	19.0826	19.4681	19.4729	19.7949	19.9472		20.5111	20.4644	20.8212	20.0755	22.2916										23.5638		23.9406	32.681	0	1	0	8.19642	4.3912				13	1	1	1	1	1	1	0	2	1	1
PF3D7_1426000	PF3D7_1426000	P. falciparum 3D7	60S ribosomal protein L21			21.9577	22.067	22.3499	18.2489	18.6512	18.9052	22.6095	22.8086	22.9334	22.6973	22.7725	23.0876	24.6649	25.1488	25.275				25.6068	25.0526	25.2499	24.4923	24.3031	24.6096	18.795	0	1	0	8.6208	5.9917				18	1	3	2	0	1	2	2	1	3	0
PF3D7_1426100	PF3D7_1426100	P. falciparum 3D7	basic transcription factor 3b, putative			19.9779	20.5133	20.7603	20.0937	19.8276	20.2398	20.1971	21.0289	21.4269					23.6096	23.8093					23.4425	23.9495				19.393	0	1	0	8.04151	3.4348				13	2	1	2	0	1	0	2	2	2	0
PF3D7_1427900	PF3D7_1427900	P. falciparum 3D7	conserved protein, unknown function			19.2413	18.0095	18.484	17.831	18.4027	19.5424	18.5868	21.1265	22.1467	19.9634	21.2174	20.5309	22.6987	22.735	22.8647	21.9535	22.2368	22.7614	22.9733	24.217	24.7995	22.9877	24.1015	22.9627	33.006	0	1	0	8.287	29.982				44	4	3	1	1	2	3	2	6	12	3
PF3D7_1428300	PF3D7_1428300	P. falciparum 3D7	proliferation-associated protein 2g4, putative			16.8489	16.1656	16.8908	17.2675	16.6131	18.3011	17.1803	17.5522	17.8278	16.579	17.4748	18.091							21.551	21.1473	21.6124				42.641	0	1	0	7.58554	4.6251				17	2	0	0	2	1	3	1	2	1	1
PF3D7_1431700	PF3D7_1431700	P. falciparum 3D7	60S ribosomal protein L14, putative			21.9967	22.096	21.2978	22.3523	22.4662	22.8874	22.3061	22.5308	22.6616	21.8781	21.3822	22.639	24.8904	25.1015	24.7846	24.141	24.1174	24.4425	25.3066	24.8336	25.0935	23.7895	23.5045	24.0854	19.297	0	1	0	8.63151	4.4308				25	3	2	0	2	2	2	2	2	3	2
PF3D7_1432800	PF3D7_1432800	P. falciparum 3D7	HP12 protein homolog, putative								17.3393					20.3692							21.4123							85.707	0	1	0	7.67328	1.967				1	0	0	0	0	0	0	0	0	0	0
PF3D7_1433400	PF3D7_1433400	P. falciparum 3D7	conserved Plasmodium membrane protein, unknown function			12.6036			14.9842		16.4058							20.598												682.45	0	1	0	7.50504	2.9157				3	2	0	0	1	0	0	0	0	0	0
PF3D7_1434300	PF3D7_1434300	P. falciparum 3D7	Hsp70/Hsp90 organizing protein								15.6178		17.788	17.2429		16.9638	17.6007								22.0319	22.0491			21.3713	66.056	0	1	0	7.41132	11.227				10	0	0	0	0	0	1	0	2	2	0
PF3D7_1434500	PF3D7_1434500	P. falciparum 3D7	dynein-related AAA-type ATPase, putative						15.2654	15.1971	15.4618												23.1916							971	0	1	0	7.67883	2.0819				2	0	0	0	1	0	0	0	0	1	0
PF3D7_1434800	PF3D7_1434800	P. falciparum 3D7	mitochondrial acidic protein MAM33, putative							15.8947	16.7523		20.0987										19.456							28.872	0	1	0	7.19117	2.81				3	0	0	0	0	1	1	0	1	0	0
PF3D7_1436000	PF3D7_1436000	P. falciparum 3D7	glucose-6-phosphate isomerase			14.6774	13.7941	14.2669				14.1868	15.7418	15.1489												19.5898				67.367	1	1	0	6.70731	2.608				4	0	0	1	0	0	0	0	2	1	0
PF3D7_1436300	PF3D7_1436300	P. falciparum 3D7	translocon component PTEX150						21.1433	20.9263	21.267		15.1773	15.2385	16.4611	15.442	17.4376				25.7129	25.9383	25.3612				22.3737		22.2677	112.41	0	1	0	8.44962	77.31				45	0	0	0	9	15	15	0	0	1	1
PF3D7_1437000	PF3D7_1437000	P. falciparum 3D7	N-acetyltransferase, putative							13.5841	13.7826	13.7346	14.5691	14.0617												18.5026				64.188	0	1	0	6.3878	2.0101				6	0	0	0	0	1	1	1	2	1	0
PF3D7_1437900	PF3D7_1437900	P. falciparum 3D7	HSP40, subfamily A			19.3337	17.1279	18.9859	19.376	19.2709	19.4737	20.0696	21.0338	20.7179	18.725	18.4401	20.8007	23.8764		23.5869	23.5638	23.6096	23.4551	23.8093	24.2961	24.2463				48.469	1	1	0	8.31823	20.008				37	3	1	3	2	1	4	2	5	6	2
PF3D7_1438100	PF3D7_1438100	P. falciparum 3D7	secretory complex protein 62														16.155												18.8862	43.937	0	1	0	6.1184	3.07				5	0	0	0	1	0	1	0	0	1	0
PF3D7_1438400	PF3D7_1438400	P. falciparum 3D7	metacaspase-like protein			19.0139	19.0924	19.2109							19.2594	17.0639	19.2529										24.8904	22.9553	24.6865	237.83	0	1	0	8.50621	2.6372				7	1	0	0	0	1	0	0	0	0	1
PF3D7_1438900	PF3D7_1438900	P. falciparum 3D7	thioredoxin peroxidase 1			18.8998	18.6514	18.8638	19.4029	20.2046	20.9076	19.0257	20.545	20.7459	20.1782	21.1298	21.4936	22.7558	22.7125	22.8469	22.8636	23.0014	23.417	23.0604	23.5404	23.7492	22.6081	23.48	23.3645	21.807	1	1	0	8.26958	14.509				40	2	3	2	2	3	3	4	3	4	3
PF3D7_1439800	PF3D7_1439800	P. falciparum 3D7	vesicle-associated membrane protein, putative			18.2751	17.8396	17.6919	16.9439	17.5746	18.0785	16.2283	18.2521	18.5624	17.0696		17.6675	22.2091	21.8976	21.755					21.7536	22.1127				27.686	0	1	0	7.59917	5.2399				8	1	0	1	0	0	1	0	1	2	1
PF3D7_1439900	PF3D7_1439900	P. falciparum 3D7	triosephosphate isomerase			20.6888	20.6225	20.354	20.6467	20.6897	21.1512	21.4016	22.2354	21.5395	20.6127	21.5059	21.642	24.4041	24.4676	24.4738	23.7077	23.7286	23.9847	24.654	25.2571	24.7338	23.7695	24.3844	23.8576	27.934	0	1	0	8.57508	24.521				48	4	4	2	3	5	4	4	6	5	2
PF3D7_1441100	PF3D7_1441100	P. falciparum 3D7	conserved Plasmodium protein, unknown function			18.9166	18.3425	19.278	18.2786	18.5856	19.102	19.2984	21.4627	21.4563	19.5428	21.116	20.1196							22.246	22.857	23.3511				26.306	0	1	0	7.82364	19.806				12	1	1	0	1	0	1	1	1	4	0
PF3D7_1441200	PF3D7_1441200	P. falciparum 3D7	60S ribosomal protein L1, putative					17.9086					19.9844		19.5173	20.572	21.3783										22.7529	22.9757	22.9307	24.805	0	1	0	7.8006	7.3699				9	0	0	1	0	0	0	0	2	1	1
PF3D7_1442900	PF3D7_1442900	P. falciparum 3D7	protein transport protein SEC7, putative									11.0887		12.1911												19.038				404.58	0	1	0	6.03735	3.4758				2	0	0	0	0	0	0	0	0	1	0
PF3D7_1444800	PF3D7_1444800	P. falciparum 3D7	fructose-bisphosphate aldolase			22.8661	23.3778	23.8385	23.4923	23.3101	23.867	23.2678	23.6757	23.895	23.5638	23.2821	24.4425	27.4234	27.7195	28.003	27.141	26.9539	27.189	27.8973	27.4707	27.7708	26.6595	26.6998	26.9316	40.105	0	1	0	9.49258	120.87				167	15	17	15	13	15	14	12	16	15	9
PF3D7_1446200	PF3D7_1446200	P. falciparum 3D7	M17 leucyl aminopeptidase			17.9901	17.8374	17.9996	18.6415	18.6109	19.3638	19.157	20.2211	19.9262	19.234	19.2784	20.6769	23.8191	23.7286	23.7895	23.3376	23.2961	23.7077	24.1719	24.141	24.1946	23.1601	23.5754	23.7695	67.82	0	1	0	8.4201	12.791				41	2	2	2	3	4	3	3	4	4	4
PF3D7_1446300	PF3D7_1446300	P. falciparum 3D7	conserved Plasmodium membrane protein, unknown function												16.2536		16.2618												20.6811	143.16	0	1	0	6.95851	2.57				2	1	0	0	0	0	0	0	0	0	1
PF3D7_1447000	PF3D7_1447000	P. falciparum 3D7	40S ribosomal protein S5			17.4679	17.3385	17.527	17.8842	18.618	18.8343	17.3964	18.5933	18.7481	18.5431	18.4889	19.994												22.4622	29.957	0	1	0	7.82444	3.7717				14	1	1	1	1	1	1	1	1	1	1
PF3D7_1451100;P13639	PF3D7_1451100	P. falciparum 3D7	elongation factor 2			20.3809	19.9004	20.335	20.1427	20.6677	21.1449	20.7113	21.6045	21.3086	21.1623	20.249	22.0919	25.8215	25.6944	25.9473	25.3031	25.2643	25.6811	26.0752	26.2133	26.3511	25.4831	25.4862	26.0691	93.522	0	1	1	9.0304	41.398				109	8	10	8	7	10	9	10	13	8	9
PF3D7_1452000	PF3D7_1452000	P. falciparum 3D7	rhoptry neck protein 2												15.3655	13.6315	16.3194										21.1395		21.1419	249.48	0	1	0	7.08511	12.601				9	0	0	0	0	0	0	0	1	0	2
PF3D7_1453700	PF3D7_1453700	P. falciparum 3D7	co-chaperone p23			18.4181	17.8573	18.311	18.7658	19.4581	19.5709	16.7756	21.6256	21.5228	21.0141	21.7769	21.4537	22.4276	22.318	22.491	22.406	23.0827	22.9574		23.7594	23.4923	22.9335	23.8093	23.0706	30.491	0	1	0	8.20472	37.236				24	2	1	2	2	1	2	0	4	3	3
PF3D7_1454400	PF3D7_1454400	P. falciparum 3D7	aminopeptidase P			13.8133		15.6874	15.9219	16.0543	16.8139	16.5296	17.8353	17.2791	16.2167	18.1921	18.0149				21.7695	21.6926	22.1351	22.2682	22.2624	22.328	21.5499	22.3499	21.8595	90.129	0	1	0	7.83062	11.748				19	0	0	2	0	1	1	2	3	4	1
PF3D7_1454700	PF3D7_1454700	P. falciparum 3D7	6-phosphogluconate dehydrogenase, decarboxylating, putative								18.0876	18.5702	18.3172	18.2985	18.4399											22.4175				52.993	0	1	0	7.60354	2.5187				4	0	0	0	0	0	1	0	1	0	1
PF3D7_1455500	PF3D7_1455500	P. falciparum 3D7	AP-1 complex subunit gamma, putative													18.3125												23.2243		124.24	0	1	0	7.2116	2.0475				1	0	0	0	0	1	0	0	0	0	0
PF3D7_1456800	PF3D7_1456800	P. falciparum 3D7	V-type H(+)-translocating pyrophosphatase, putative			18.3469	17.9709	18.3122	18.8206	19.334	19.3584	18.113	18.8619	19.0995	19.0157	19.2945	19.9103	22.6294	22.2371	22.5804	22.8271	23.1985	22.9752	22.5727	22.6652	22.9341		23.0564	22.9246	76.416	0	1	0	8.11404	14.816				24	1	1	2	2	2	2	3	1	3	1
PF3D7_1457000	PF3D7_1457000	P. falciparum 3D7	signal peptide peptidase			19.6125	19.011	19.6693	19.4561	19.1197	19.3595	18.4837	20.2873	19.7303	19.4017	19.7671	19.7693	23.3511	22.9727	23.1053				22.6296	23.2821	22.7503				47.578	0	1	0	8.07394	6.6483				19	1	1	1	1	1	1	3	2	2	1
PF3D7_1457200	PF3D7_1457200	P. falciparum 3D7	thioredoxin 1			24.1565	23.5754	24.8191	23.1845	23.7492	24.217	24.0526	24.8717	24.5344	24.1253	23.391	24.9495	25.8552	25.6649	26.3031	24.9628	25.0401	25.1946	26.0062	25.8409	25.7129	24.6376	25.4984	25.1174	11.716	0	1	0	8.97879	70.232				41	3	4	5	1	4	3	2	5	4	3
PF3D7_1457300	PF3D7_1457300	P. falciparum 3D7	conserved Plasmodium protein, unknown function			13.7658	13.3454	13.3764				14.1874	16.159	15.3303		16.911	16.7908							19.1609	20.4695	19.4049				75.986	0	1	0	7.05419	6.1886				9	0	1	1	0	0	0	1	2	2	0
PF3D7_1460700	PF3D7_1460700	P. falciparum 3D7	60S ribosomal protein L27			21.6307	20.5139	19.8866	20.542	19.1394	22.1423	20.1826		21.3162	20.5705	21.8867	22.4351	24.1488	24.4041		23.8385		24.1253				23.3778	23.391	23.7077	16.745	0	1	0	8.34011	20.109				21	2	2	2	3	1	1	2	1	1	3
PF3D7_1461300	PF3D7_1461300	P. falciparum 3D7	40S ribosomal protein S28e, putative			19.8215	19.4982	19.3099	19.5728	20.2029	20.5479	19.2028	21.5851	21.54	20.2503	20.6343	21.2041									22.659				7.4937	0	1	0	7.7306	2.4091				7	2	0	0	1	0	1	0	1	1	0
PF3D7_1462300	PF3D7_1462300	P. falciparum 3D7	conserved Plasmodium protein, unknown function										14.6037												19.8727					161.22	0	1	0	6.16702	2.3763				2	0	0	0	0	0	0	0	2	0	0
PF3D7_1462800	PF3D7_1462800	P. falciparum 3D7	glyceraldehyde-3-phosphate dehydrogenase			23.7182	23.4551	23.6757	23.9584	24.4488	24.5926	24.2535	25.417	25.4738	24.3975	24.6153	24.945	28.3023	28.203	28.4668	27.8564	28.141	28.203	28.8504	29.0217	29.3388	27.7195	28.249	27.9705	36.635	0	1	0	9.81173	174.71				266	20	14	17	18	19	20	19	35	26	26
PF3D7_1464500	PF3D7_1464500	P. falciparum 3D7	conserved Plasmodium membrane protein, unknown function						14.1871	13.6414	13.3362				15.7002	15.1535	15.0429				21.2195						21.5512	22.0556	21.0897	388.81	0	1	0	7.42488	6.2872				9	0	0	0	2	0	1	0	0	0	4
PF3D7_1465900	PF3D7_1465900	P. falciparum 3D7	40S ribosomal protein S3			19.3843		19.5572	19.4564	20.2821	20.1733	19.2268	19.1568	17.2246	19.961	20.3515	21.7167											24.1174	23.3778	24.668	0	1	0	8.21759	6.8962				14	1	0	2	1	1	1	0	2	1	0
PF3D7_1466300	PF3D7_1466300	P. falciparum 3D7	26S proteasome regulatory subunit RPN2, putative			13.1182	13.5381	13.4255	13.3957	13.1243	12.8642	13.4878	14.4011	14.3314												19.5659				132.77	0	1	0	6.76788	3.6257				4	1	0	1	0	0	1	0	1	0	0
PF3D7_1468100	PF3D7_1468100	P. falciparum 3D7	conserved Plasmodium protein, unknown function			12.2313	12.45	12.2788				14.618	15.6687	15.8213	13.1863		13.2634							21.5036	21.9556	22.2506				295.83	0	1	0	7.29778	9.9467				11	0	0	1	0	0	0	1	3	4	1
PF3D7_1468600	PF3D7_1468600	P. falciparum 3D7	aminophospholipid transporter, putative										16.6774	16.0371												22.1711				240.46	0	1	0	7.22246	1.9716				2	0	0	0	0	0	0	1	1	0	0
PF3D7_1468700	PF3D7_1468700	P. falciparum 3D7	eukaryotic initiation factor 4A			20.0443	16.7716	17.0757	16.7358	16.8757	17.953	20.1621	21.79	22.1119	17.8514	17.1822	20.3633	24.3778	24.1174	24.1946				24.0275	25.4676	25.3844	22.939		24.2961	45.31	0	1	0	8.45235	36.506				33	4	3	0	1	2	4	2	5	5	2
PF3D7_1469600	PF3D7_1469600	P. falciparum 3D7	biotin carboxylase subunit of acetyl CoA carboxylase, putative			14.8038	13.9697	15.3737				14.0047	13.0077	14.3807				21.7848	22.2357	22.3944				22.2616		21.9564				394.88	0	1	0	7.40068	6.8383				10	3	1	1	0	0	0	0	3	2	0
PF3D7_1470300	PF3D7_1470300	P. falciparum 3D7	conserved Plasmodium protein, unknown function														19.7606												20.6439	18.248	0	1	0	6.64752	1.949				1	0	0	1	0	0	0	0	0	0	0
PF3D7_1470800	PF3D7_1470800	P. falciparum 3D7	conserved Plasmodium protein, unknown function							21.5473												25.9955								131.07	0	1	0	8.31247	2.3271				7	1	0	0	0	1	0	0	0	1	0
PF3D7_1471100	PF3D7_1471100	P. falciparum 3D7	exported protein 2			17.8678	17.6213	17.6385	17.8567	18.0017	18.7058	17.5367	19.2947	19.0575	18.1378	18.1156	19.2695									22.292				33.411	1	1	0	7.73256	13.441				13	1	1	1	1	1	1	0	2	2	1
PF3D7_1473200	PF3D7_1473200	P. falciparum 3D7	DnaJ protein, putative										17.2443	16.6067											20.6946	20.6129				52.453	1	1	0	6.68539	4.2606				4	0	0	0	0	0	0	0	1	2	0
PF3D7_1474800	PF3D7_1474800	P. falciparum 3D7	proteasome subunit alpha type-1, putative									16.7512	18.887	18.4096	17.6764	20.0808	19.6304								22.6583	22.1464		22.6552	21.7941	28.837	0	1	0	7.63375	9.0427				13	0	0	0	0	0	0	0	4	2	1
PF3D7_1476300	PF3D7_1476300	P. falciparum 3D7	Plasmodium exported protein (PHISTb), unknown function						23.9672	23.9495	24.5812				24.1946	22.908	24.5225				28.1459	28.0137	28.2714				27.9869	27.019	27.8385	68.141	1	1	0	9.45211	323.31				146	0	0	0	28	20	30	0	1	1	25
PF3D7_1477000	PF3D7_1477000	P. falciparum 3D7	Plasmodium exported protein (hyp17), unknown function, pseudogene			15.3982			17.6837	17.7247	17.7085				19.1438	17.9119	19.5239											22.4277		115.82	0	1	0	7.9347	4.3679				7	1	0	0	1	1	1	0	1	0	1
PF3D7_1477500	PF3D7_1477500	P. falciparum 3D7	Plasmodium exported protein (PHISTb), unknown function												18.0485	17.1776	18.2042												21.5204	60.552	1	1	0	7.2895	2.6357				3	0	0	0	0	0	0	0	0	0	1
PF3D7_0515700	PF3D7_0515700	P. falciparum 3D7; Homo sapiens	glideosome-associated protein 40, putative			18.0097	17.4432	17.2705	16.5889	16.5599	17.6963	17.6078	17.8264	17.7464		16.8824	17.544						20.9651	21.877		21.6848				51.799	0	1	0	7.5736	2.9051				15	1	2	1	1	0	3	1	1	3	0
PF3D7_0608800	PF3D7_0608800	P. falciparum 3D7; Homo sapiens	ornithine aminotransferase			21.4382	20.9472	21.261	21.7744	22.1549	21.9271	21.0347	22.2919	22.2071	21.7975	22.728	22.8152	25.7645	25.7024	25.7129	25.6431	25.9089	25.726	25.6703	26.2426	26.2767	25.4073	26.506	25.9134	46.055	0	1	0	9.05824	37.35				42	1	3	3	1	6	2	1	3	4	3
PF3D7_0707300	PF3D7_0707300	P. falciparum 3D7; Homo sapiens	rhoptry-associated membrane antigen			16.1823	16.5338	16.3914	16.8871	16.7255	17.1168	17.3094	19.9094	19.6354	16.5813	20.5664	20.2441							23.1169	24.3443	24.1795		24.5754	23.2032	103.64	0	1	0	8.21601	21.068				25	1	1	1	0	1	1	3	5	5	2
PF3D7_0723300	PF3D7_0723300	P. falciparum 3D7; Homo sapiens	conserved Plasmodium protein, unknown function													13.9907	14.4489												18.2956	101.14	0	1	0	6.17814	2.3505				1	0	0	0	0	0	0	0	0	0	0
PF3D7_0818000	PF3D7_0818000	P. falciparum 3D7; Homo sapiens	conserved protein, unknown function						15.2438	15.4347	15.2164	15.5375	15.6116	15.8976												19.0166				45.156	0	1	0	6.52609	3.6473				3	0	0	0	0	1	1	0	0	1	0
PF3D7_0818200;P27348;Q04917;P31946;P61981;P31947	PF3D7_0818200	P. falciparum 3D7; Homo sapiens	14-3-3 protein			20.6608	20.3147	20.8282	20.7245	20.8614	21.2851	20.906	22.436	22.0927	21.5049	22.7733	22.6468	25.0148	24.7234	25.141	24.5522	24.5344	24.558	25.0484	25.6971	25.8528	24.6971	25.8694	24.9847	30.192	0	1	1	8.83077	50.331				86	4	5	8	6	5	8	8	10	8	6
PF3D7_0831600	PF3D7_0831600	P. falciparum 3D7; Homo sapiens	cytoadherence linked asexual protein 8						16.4089	17.9962	16.7948				18.0685	17.1023	18.619				22.8339	23.2483	22.8431				23.0023	22.9955	22.8937	165.61	0	1	0	7.97656	17.494				19	0	0	0	2	5	2	0	0	1	2
PF3D7_0901800	PF3D7_0901800	P. falciparum 3D7; Homo sapiens	Plasmodium exported protein, unknown function												16.9926	15.318	16.5118												19.073	32.927	1	1	0	6.62685	2.1816				2	0	0	0	0	0	0	0	0	0	1
PF3D7_1008400	PF3D7_1008400	P. falciparum 3D7; Homo sapiens	26S protease regulatory subunit 4, putative											16.4597		16.7861	17.7702												20.9753	49.838	0	1	0	7.02804	3.6477				5	0	0	0	0	0	0	0	0	1	0
PF3D7_1015800	PF3D7_1015800	P. falciparum 3D7; Homo sapiens	ribonucleoside-diphosphate reductase small chain, putative									14.8811	15.3701	15.3289												19.3224				40.387	0	1	0	6.39813	2.3513				4	0	0	0	0	0	0	2	1	1	0
PF3D7_1027300	PF3D7_1027300	P. falciparum 3D7; Homo sapiens	peroxiredoxin			23.3778	23.1891	23.3511	23.4041	24.275	23.5522	23.2321	23.5285	23.8764	23.6431	23.1715	23.7286	27.141	26.8623	26.976	26.4862	26.8504	26.5433	27.1604	26.7518	27.1795	26.317	26.4218	26.0935	43.929	0	1	0	9.28623	69.317				97	8	8	9	9	10	7	9	9	8	8
PF3D7_1104400	PF3D7_1104400	P. falciparum 3D7; Homo sapiens	thioredoxin, putative										18.3862	18.205											22.3279	22.2293				49.266	0	1	0	7.17114	3.7632				6	0	0	0	0	0	0	0	4	2	0
PF3D7_1126000	PF3D7_1126000	P. falciparum 3D7; Homo sapiens	threonine--tRNA ligase						14.2731		14.0696					14.5861	17.7295												22.2215	119.54	0	1	0	7.23081	5.1992				7	0	0	0	0	0	2	0	0	0	1
PF3D7_1408100	PF3D7_1408100	P. falciparum 3D7; Homo sapiens	plasmepsin III						15.5403		15.4921	17.6634	19.2469	19.3161	17.757	19.1231	18.4823							22.3315	22.9389	23.3239	21.8714	23.3645	21.8822	51.693	0	1	0	7.83488	5.9875				9	0	0	0	0	0	1	0	2	3	0
PF3D7_1447900	PF3D7_1447900	P. falciparum 3D7; Homo sapiens	multidrug resistance protein 2						16.3964	17.0104	14.8847				17.6271	17.2217	17.2793				21.8073	22.33					21.9482	22.132	21.6788	119.01	0	1	0	7.59845	16.302				18	0	0	0	3	4	1	0	0	0	5
[truncated: 15 more columns]
