# Supplementary material for: PerTurboID, a targeted in situ method reveals the impact of kinase deletion on its local protein environment in the cytoadhesion complex of malaria-causing parasites
Source: eLife. 2023 Sep 22;12:e86367. doi: 10.7554/eLife.86367 (PMC10564455; doi:10.7554/eLife.86367)
Supplement: Supplementary file 2. [file elife-86367-supp2.xlsx]

## Sheet: pulseibaq_allsites_FIN
Supplementary Table 2: processed FIKK4.1 TurboID. Contains only proteins exceeding threshold over NF54 background (see methods). P values, q values, and log2 fold changes are included for each time point relative to NF54, and 40 hpi/ 16 hpi for FIKK4.1 TurboID. Imputed iBAQ intensities, as well as the normalized (but not imputed) original data, are included.
Protein IDs	Majority protein IDs	Organism	Protein Name HS	Gene names HS	Protein Name PF	# TM Domains PF	SignalP Peptide PF	Exported PF	PF	HS	p value_FIKK4.1 16 hpi/NF54 16 hpi	q value_FIKK4.1 16 hpi/NF54 16 hpi	L2FC_FIKK4.1 16 hpi/NF54 16 hpi	p value_FIKK4.1 40 hpi/NF54 40 hpi	q value_FIKK4.1 40 hpi/NF54 40 hpi	L2FC_FIKK4.1 40 hpi/NF54 40 hpi	p value_FIKK4.1 40hpi/FIKK4.1 16hpi	q value_FIKK4.1 40hpi/FIKK4.1 16hpi	L2FC_FIKK4.1 40hpi/FIKK4.1 16hpi	NF54/FIKK4.1T all time points	iBAQ NF54_1_16h_imputed	iBAQ NF54_2_16h_imputed	iBAQ NF54_3_16h_imputed	iBAQ FIKK41_1_16h_imputed	iBAQ FIKK41_2_16h_imputed	iBAQ FIKK41_3_16h_imputed	iBAQ NF54_1_40h_imputed	iBAQ NF54_2_40h_imputed	iBAQ NF54_3_40h_imputed	iBAQ FIKK41_1_40h_imputed	iBAQ FIKK41_2_40h_imputed	iBAQ FIKK41_3_40h_imputed	iBAQ NF54_1_16h_normalized	iBAQ NF54_2_16h_normalized	iBAQ NF54_3_16h_normalized	iBAQ FIKK41_1_16h_normalized	iBAQ FIKK41_2_16h_normalized	iBAQ FIKK41_3_16h_normalized	iBAQ NF54_1_40h_normalized	iBAQ NF54_2_40h_normalized	iBAQ NF54_3_40h_normalized	iBAQ FIKK41_1_40h_normalized	iBAQ FIKK41_2_40h_normalized	iBAQ FIKK41_3_40h_normalized	Intensity	Score	MS/MS Count
Q08495	Q08495	Homo sapiens	Dematin	DMTN	NA	NA	NA	NA	0	1	0.00192995	2.03321	14.7652	0.000139525	2.79251	10.7647	0.00536028	1.32426	-4.38582	12.765	14.3046	12.487	14.5685	28.544	28.6011	28.5107	13.9807	13.8018	12.4216	24.6698	23.5462	24.2822	NA	NA	NA	28.544	28.6011	28.5107	NA	NA	NA	24.6698	23.5462	24.2822	10.4796	323.31	411
PF3D7_0424500	PF3D7_0424500	P. falciparum 3D7	NA	NA	serine/threonine protein kinase, FIKK family	1	N/A	1	1	0	0.000470694	2.35824	11.2098	4.10811e-05	2.97181	11.8686	0.139306	0.616738	-0.567592	11.5392	14.5267	14.2963	13.6402	25.4077	25.3855	25.2993	12.2262	13.4823	13.0755	25.2753	24.526	24.5884	NA	NA	NA	25.4077	25.3855	25.2993	NA	NA	NA	25.2753	24.526	24.5884	9.94511	166.19	181
PF3D7_0201500	PF3D7_0201500	P. falciparum 3D7	NA	NA	Plasmodium exported protein (hyp9), unknown function	2	HMM: MRSLKSCFFKHNWNICLLWIRVILSSSLLI, NN: MRSLKSCFFKHNWNICLLWIRVILSSSLLI	1	1	0	0.000315691	2.47955	10.5563	0.000139388	2.79251	12.4542	0.164196	0.56793	1.08049	11.5052	13.7212	12.851	12.352	23.8674	23.357	23.3686	12.3884	12.5465	11.537	25.5326	23.7338	24.568	NA	NA	NA	23.8674	23.357	23.3686	NA	NA	NA	25.5326	23.7338	24.568	9.25527	143.33	51
PF3D7_1476300	PF3D7_1476300	P. falciparum 3D7	NA	NA	Plasmodium exported protein (PHISTb), unknown function	1	N/A	1	1	0	1.63073e-05	3.26128	11.113	0.000487653	2.53374	10.8756	0.153159	0.589547	-0.850628	10.9943	13.0904	13.3756	12.7796	24.1916	24.053	24.3401	11.1643	13.2246	13.0171	24.0116	22.6746	23.3465	NA	NA	NA	24.1916	24.053	24.3401	NA	NA	NA	24.0116	22.6746	23.3465	9.45211	323.31	146
PF3D7_0402000	PF3D7_0402000	P. falciparum 3D7	NA	NA	Plasmodium exported protein (PHISTa), unknown function	1	N/A	1	1	0	0.000872351	2.23438	8.92063	0.000913965	2.42654	11.9282	0.00291072	1.54114	1.70544	10.4244	13.7396	14.5549	13.0369	22.9632	22.7135	22.4165	11.6126	12.2479	13.5647	24.7754	24.3246	24.1096	NA	NA	NA	22.9632	22.7135	22.4165	NA	NA	NA	24.7754	24.3246	24.1096	9.27683	67.659	89
P35611	P35611	Homo sapiens	Alpha-adducin	ADD1	NA	NA	NA	NA	0	1	0.000844252	2.23438	10.2942	5.42983e-05	2.97181	10.283	0.628475	0.146664	-0.207328	10.2886	13.1153	13.8916	12.7708	23.4622	23.62	23.578	12.5271	13.8755	12.7867	23.9502	22.6886	23.3994	NA	NA	NA	23.4622	23.62	23.578	NA	NA	NA	23.9502	22.6886	23.3994	9.37603	99.886	146
P37840	P37840	Homo sapiens	Alpha-synuclein	SNCA	NA	NA	NA	NA	0	1	0.0111157	1.64703	11.7958	0.000242562	2.71209	8.47568	0.0955099	0.708456	-0.322735	10.1357	16.1374	11.8909	13.1377	25.5414	25.417	25.595	17.229	16.6897	16.2393	25.4097	25.1739	25.0016	16.1374	NA	NA	25.5414	25.417	25.595	17.229	16.6897	16.2393	25.4097	25.1739	25.0016	9.27619	62.727	46
PF3D7_0113200	PF3D7_0113200	P. falciparum 3D7	NA	NA	Plasmodium exported protein, unknown function	2	N/A	1	1	0	0.00292679	1.95175	8.5167	5.15285e-05	2.97181	11.1574	0.04631	0.921929	1.86616	9.83704	12.8695	14.4261	13.2869	22.005	22.0581	22.0695	11.9282	12.9138	13.417	24.7167	23.3188	23.6957	NA	NA	NA	22.005	22.0581	22.0695	NA	NA	NA	24.7167	23.3188	23.6957	9.32094	271.92	85
PF3D7_0532300	PF3D7_0532300	P. falciparum 3D7	NA	NA	Plasmodium exported protein (PHISTb), unknown function	0	N/A	1	1	0	0.0115625	1.64614	10.08	1.72939e-05	2.97181	9.5614	0.0448503	0.929105	1.20488	9.82071	19.0349	15.4168	18.3113	27.7998	27.6424	27.5609	18.8322	19.7649	19.3364	29.4369	28.5184	28.6624	19.0349	15.4168	18.3113	27.7998	27.6424	27.5609	18.8322	19.7649	19.3364	29.4369	28.5184	28.6624	10.9048	323.31	585
PF3D7_1401200	PF3D7_1401200	P. falciparum 3D7	NA	NA	Plasmodium exported protein, unknown function	1	HMM: MFPSYIRKFSFTLLLCIIALSC, NN: MFPSYIRKFSFTLLLCIIALSC	1	1	0	0.00831266	1.6938	8.07155	0.000708111	2.49229	11.3938	0.0422066	0.941702	2.16115	9.73266	14.86	14.0955	12.3102	21.7645	21.7655	21.9502	12.295	12.737	12.7505	24.771	23.1444	24.0483	NA	NA	NA	21.7645	21.7655	21.9502	NA	NA	NA	24.771	23.1444	24.0483	9.08622	15.499	62
PF3D7_0402100	PF3D7_0402100	P. falciparum 3D7	NA	NA	Plasmodium exported protein (PHISTb), unknown function	1	HMM: MGKAFLFKSLLCKRYSAPIIGLVYVIVLTVGI, NN: MGKAFLFKSLLCKRYSAPIIGLVYVIVLTVGI	1	1	0	0.00327304	1.92562	9.62	0.000203462	2.72148	9.71486	0.483302	0.235791	0.459295	9.66743	13.4746	12.8386	10.8703	22.2217	21.4817	22.3402	11.91	13.7676	12.5991	23.3093	21.5491	22.5629	NA	NA	NA	22.2217	21.4817	22.3402	NA	NA	NA	23.3093	21.5491	22.5629	8.92968	18.48	46
P11171;Q9Y2J2;Q9H4G0	P11171	Homo sapiens	Protein 4.1	EPB41	NA	NA	NA	NA	0	1	0.000495684	2.35824	10.5655	3.5804e-05	2.97181	8.58707	0.0790623	0.768816	-0.682458	9.5763	17.2759	16.5415	16.4334	27.3259	27.2445	27.377	17.9066	18.277	17.9551	27.0524	26.3847	26.4629	17.2759	16.5415	16.4334	27.3259	27.2445	27.377	17.9066	18.277	17.9551	27.0524	26.3847	26.4629	10.6203	323.31	926
PF3D7_1478600	PF3D7_1478600	P. falciparum 3D7	NA	NA	EMP1-trafficking protein	2	N/A	1	1	0	0.00151014	2.10082	8.35876	0.000126918	2.79251	10.706	0.106412	0.687218	1.05262	9.53238	12.952	14.2684	13.1858	21.9609	21.8743	21.6473	11.9447	11.9814	12.5963	23.6555	22.4427	22.5421	NA	NA	NA	21.9609	21.8743	21.6473	NA	NA	NA	23.6555	22.4427	22.5421	9.39131	323.31	162
PF3D7_1200700	PF3D7_1200700	P. falciparum 3D7	NA	NA	acyl-CoA synthetase	0	HMM: MNITLSLFFSVIYVVYVLPC, NN: MNITLSLFFSVIYVVYVLPCCTQLSNSK	1	1	0	0.00983129	1.66946	9.53509	9.62916e-05	2.83249	9.37594	0.289314	0.399681	-0.493608	9.45552	11.7975	12.9079	15.1375	23.0105	22.7754	22.6621	12.6035	13.3242	12.9118	22.9887	21.817	22.1615	NA	NA	NA	23.0105	22.7754	22.6621	NA	NA	NA	22.9887	21.817	22.1615	9.26644	86.425	97
P27105	P27105	Homo sapiens	Erythrocyte band 7 integral membrane protein	STOM	NA	NA	NA	NA	0	1	0.00573162	1.78218	10.3289	0.00970224	1.71724	8.4351	0.340245	0.346703	-1.13861	9.38198	13.1634	14.1745	11.0016	23.5344	22.7506	23.041	13.7851	13.6137	13.2061	23.1132	20.1539	22.6431	NA	NA	NA	23.5344	22.7506	23.041	NA	NA	NA	23.1132	20.1539	22.6431	8.9062	61.834	33
Q00013	Q00013	Homo sapiens	55 kDa erythrocyte membrane protein	MPP1	NA	NA	NA	NA	0	1	0.00236474	1.98069	9.55982	0.0086097	1.75352	9.09224	0.173231	0.553098	-1.58409	9.32603	13.1144	14.743	13.874	23.5064	23.4274	23.4771	10.2367	13.3105	14.8347	22.9474	20.4072	22.304	NA	NA	NA	23.5064	23.4274	23.4771	NA	NA	NA	22.9474	20.4072	22.304	9.15366	121.41	92
PF3D7_0730900	PF3D7_0730900	P. falciparum 3D7	NA	NA	EMP1-trafficking protein	1	N/A	1	1	0	0.00138092	2.10082	9.60728	0.000280906	2.67651	8.97157	0.327673	0.359621	0.440135	9.28942	15.4798	16.9197	16.6078	26.0556	26.0192	25.7544	17.1575	17.6837	17.3937	27.0524	25.9154	26.1818	15.4798	16.9197	16.6078	26.0556	26.0192	25.7544	17.1575	17.6837	17.3937	27.0524	25.9154	26.1818	10.8646	323.31	1188
PF3D7_0102200	PF3D7_0102200	P. falciparum 3D7	NA	NA	ring-infected erythrocyte surface antigen	0	N/A	1	1	0	0.000194482	2.56499	9.73826	0.00167425	2.27515	8.74612	0.541371	0.194366	-0.415438	9.24219	12.8401	12.2252	13.029	22.5282	22.2764	22.5044	14.4634	13.6908	11.6702	22.9892	21.0239	22.0497	NA	NA	NA	22.5282	22.2764	22.5044	NA	NA	NA	22.9892	21.0239	22.0497	9.11926	44.607	84
PF3D7_1301400	PF3D7_1301400	P. falciparum 3D7	NA	NA	Plasmodium exported protein (hyp12), unknown function	1	HMM: MFSSTTNIFFSLVFLVLLLLLSIKTN, NN: MFSSTTNIFFSLVFLVLLLLLSIKTN	1	1	0	1.22978e-05	3.28692	8.17187	4.19148e-05	2.97181	10.0786	0.0282586	1.08697	1.25292	9.12525	13.1219	12.5828	12.9285	21.1987	20.8783	21.0717	12.2492	11.9691	12.4533	22.8164	22.0451	22.046	NA	NA	NA	21.1987	20.8783	21.0717	NA	NA	NA	22.8164	22.0451	22.046	8.58692	88.614	31
Q96PL5	Q96PL5	Homo sapiens	Erythroid membrane-associated protein	ERMAP	NA	NA	NA	NA	0	1	0.00520582	1.79856	9.77861	0.00424378	2.01617	7.91028	0.22586	0.470069	-1.41741	8.84445	11.2048	13.4873	13.3121	22.5909	22.3449	22.4043	13.2024	13.7056	12.4489	22.2463	19.4649	21.3767	NA	NA	NA	22.5909	22.3449	22.4043	NA	NA	NA	22.2463	19.4649	21.3767	8.8689	25.54	22
PF3D7_1223400	PF3D7_1223400	P. falciparum 3D7	NA	NA	phospholipid-transporting ATPase, putative	10	N/A	0	1	0	0.00130846	2.10509	8.00192	0.000477889	2.53374	9.30837	0.97442	0.0060525	-0.0110351	8.65514	12.9586	13.7027	12.6077	20.9969	21.113	21.1648	12.7713	11.6142	10.931	21.6533	20.9639	20.6244	NA	NA	NA	20.9969	21.113	21.1648	NA	NA	NA	21.6533	20.9639	20.6244	9.1035	61.77	109
P35612	P35612	Homo sapiens	Beta-adducin	ADD2	NA	NA	NA	NA	0	1	0.0039355	1.88726	6.54682	2.14063e-05	2.97181	10.2057	0.105471	0.687218	-0.806085	8.37628	19.8107	20.0304	18.6138	26.0386	25.925	26.1318	14.8773	15.4372	14.7454	25.7754	24.7729	25.1288	19.8107	20.0304	18.6138	26.0386	25.925	26.1318	14.8773	15.4372	14.7454	25.7754	24.7729	25.1288	10.1336	323.31	484
PF3D7_1253400;PF3D7_1479000;PF3D7_0301000	PF3D7_1253400	P. falciparum 3D7	NA	NA	acyl-CoA synthetase	0	HMM: MGIILNIYIFFIYLIYVRSH, NN: MGIILNIYIFFIYLIYVRSH;HMM: MGKVFTIYVFVIYLIYIRPNVSQ, NN: MGKVFTIYVFVIYLIYIRPNVSQ;HMM: MSIILTFLALFVFLICVFPCITE, NN: MSIILTFLALFVFLICVFPCITE	1	1	0	0.00537414	1.79257	6.57553	0.000288341	2.67651	9.95878	0.0313061	1.06439	2.95013	8.26715	12.3165	14.0224	12.6773	19.627	19.6829	19.4328	11.856	12.8657	12.9952	23.4267	21.5234	22.6431	NA	NA	NA	19.627	19.6829	19.4328	NA	NA	NA	23.4267	21.5234	22.6431	9.09304	62.669	68
PF3D7_1001000	PF3D7_1001000	P. falciparum 3D7	NA	NA	Plasmodium exported protein (hyp12), unknown function	0	HMM: MLFSFKYIYFSSTFLLLLVLQSKTK, NN: MLFSFKYIYFSSTFLLLLVLQSKTK	1	1	0	0.000145075	2.6131	5.5671	0.000173061	2.76655	10.3709	0.00126749	1.65261	2.61237	7.969	14.3181	15.1738	14.344	20.4335	20.3571	19.7467	13.2317	12.2353	11.7946	23.2596	22.5112	22.6035	NA	NA	NA	20.4335	20.3571	19.7467	NA	NA	NA	23.2596	22.5112	22.6035	8.63924	71.404	32
PF3D7_0731600	PF3D7_0731600	P. falciparum 3D7	NA	NA	acyl-CoA synthetase	0	HMM: MNISFTVCSLFILLINVVLHGA, NN: MNISFTVCSLFILLINVVLHGA	1	1	0	4.79049e-05	2.91687	7.03416	0.000173217	2.76655	8.89244	0.00260375	1.56321	3.3082	7.9633	13.2698	13.8189	14.1356	21.0694	20.818	20.4394	15.1984	15.4738	14.9018	24.7396	23.725	23.7868	NA	NA	NA	21.0694	20.818	20.4394	15.1984	15.4738	14.9018	24.7396	23.725	23.7868	9.50391	124.66	119
PF3D7_0731100	PF3D7_0731100	P. falciparum 3D7	NA	NA	EMP1-trafficking protein	1	N/A	1	1	0	9.76548e-06	3.28692	8.3196	0.000663334	2.49229	7.53861	0.0509266	0.88729	1.51935	7.92911	13.0366	12.9349	12.6694	21.4551	21.2656	20.8791	15.5409	15.1208	14.8802	23.5035	22.1017	22.5526	NA	NA	NA	21.4551	21.2656	20.8791	15.5409	15.1208	14.8802	23.5035	22.1017	22.5526	9.32496	323.31	174
Q9UEY8	Q9UEY8	Homo sapiens	Gamma-adducin	ADD3	NA	NA	NA	NA	0	1	0.00191048	2.03321	8.18537	0.0059007	1.89588	7.2602	0.0116688	1.25173	-2.64222	7.72279	13.4109	13.5889	13.8029	21.8542	22.5385	20.9662	10.2586	12.3693	13.0237	19.7451	18.518	19.169	NA	NA	NA	21.8542	22.5385	20.9662	NA	NA	NA	19.7451	18.518	19.169	8.59661	24.744	38
PF3D7_1016400	PF3D7_1016400	P. falciparum 3D7	NA	NA	serine/threonine protein kinase, FIKK family	1	N/A	1	1	0	0.00973989	1.66946	6.23725	0.00022452	2.71209	9.20121	0.0253574	1.11095	1.96395	7.71923	13.8924	14.1023	11.9987	19.7753	19.389	19.5408	12.0275	12.3019	12.664	22.1896	20.9139	21.4935	NA	NA	NA	19.7753	19.389	19.5408	NA	NA	NA	22.1896	20.9139	21.4935	8.72872	22.534	35
PF3D7_0220600	PF3D7_0220600	P. falciparum 3D7	NA	NA	Plasmodium exported protein (hyp9), unknown function	2	N/A	1	1	0	0.000625244	2.32106	6.4776	0.000240719	2.71209	8.94892	0.022971	1.13609	1.54794	7.71326	13.7173	14.5251	14.8285	21.1279	20.7009	20.6749	12.4935	13.802	14.0052	22.931	21.8522	22.3644	NA	NA	NA	21.1279	20.7009	20.6749	NA	NA	NA	22.931	21.8522	22.3644	8.49527	7.9196	14
Q8IUW5	Q8IUW5	Homo sapiens	RELT-like protein 1	RELL1	NA	NA	NA	NA	0	1	0.00815214	1.69593	6.97684	0.00222474	2.20556	8.09099	0.692595	0.116055	-0.241282	7.53391	12.1659	14.2661	14.2633	20.564	20.7578	20.3041	10.6212	12.6766	13.3313	20.2923	21.2061	19.4036	NA	NA	NA	20.564	20.7578	20.3041	NA	NA	NA	20.2923	21.2061	19.4036	7.79418	5.4489	6
PF3D7_0730800.2-p1;PF3D7_0730800	PF3D7_0730800.2-p1;PF3D7_0730800	P. falciparum 3D7	NA	NA	Plasmodium exported protein, unknown function, unspecified product	0	HMM: MVHFTKILAVTCFAATFQCSNNGVLSK, NN: MVHFTKILAVTCFAATFQCS	NA	1	0	0.000283748	2.49785	6.28301	2.60548e-05	2.97181	8.74317	0.448984	0.254811	-0.286378	7.51309	15.5781	14.6792	14.7114	21.589	21.1408	21.088	12.4117	11.7184	12.599	21.5496	20.8281	20.581	15.5781	14.6792	14.7114	21.589	21.1408	21.088	NA	NA	NA	21.5496	20.8281	20.581	8.37059	12.206	22
PF3D7_1334500	PF3D7_1334500	P. falciparum 3D7	NA	NA	MSP7-like protein	0	HMM: MKSKKIICSSCLFLIFLSVIFCS, NN: MKSKKIICSSCLFLIFLSVIFCS	1	1	0	0.000273465	2.49785	5.78741	0.00276027	2.16858	8.70473	0.108179	0.685031	1.38283	7.24607	13.9546	13.254	12.7422	19.7364	18.8555	18.7211	11.6528	11.6838	12.0108	21.3365	19.4828	20.6423	NA	NA	NA	19.7364	18.8555	18.7211	NA	NA	NA	21.3365	19.4828	20.6423	8.41402	44.65	41
PF3D7_1201100	PF3D7_1201100	P. falciparum 3D7	NA	NA	RESA-like protein with PHIST and DnaJ domains	1	N/A	1	1	0	0.00368784	1.90689	6.65997	0.0020242	2.21936	7.80543	0.0535399	0.884863	1.16626	7.2327	12.599	13.9737	12.1128	19.9077	19.4596	19.2981	11.6407	13.2044	13.9028	21.3766	20.2626	20.525	NA	NA	NA	19.9077	19.4596	19.2981	NA	NA	NA	21.3766	20.2626	20.525	8.60195	59.806	48
PF3D7_0936800	PF3D7_0936800	P. falciparum 3D7	NA	NA	Plasmodium exported protein (PHISTc), unknown function	1	N/A	1	1	0	8.20081e-07	3.86083	6.80884	0.000708925	2.49229	7.54311	0.17973	0.549453	0.729492	7.17597	17.0163	17.1644	16.8682	24.0139	23.7355	23.7261	16.8381	18.0429	16.1537	25.2532	24.0056	24.4052	NA	17.1644	16.8682	24.0139	23.7355	23.7261	16.8381	18.0429	16.1537	25.2532	24.0056	24.4052	9.40844	233.24	105
Q04656;P35670	Q04656	Homo sapiens	Copper-transporting ATPase 1	ATP7A	NA	NA	NA	NA	0	1	6.89087e-05	2.89066	7.34526	0.00290353	2.15686	6.88005	0.198643	0.518011	-0.970558	7.11266	12.8396	12.1385	12.8477	20.2221	19.7837	19.8558	11.9412	11.9222	12.4463	19.9597	18.1744	18.8157	NA	NA	NA	20.2221	19.7837	19.8558	NA	NA	NA	19.9597	18.1744	18.8157	8.49298	65.325	56
PF3D7_1371900	PF3D7_1371900	P. falciparum 3D7	NA	NA	Plasmodium exported protein, unknown function	1	HMM: MIFFLSKKSSFGFLLCGLFLLLNNNVFQK, NN: MIFFLSKKSSFGFLLCGLFLLLNNNVFQK	1	1	0	0.014535	1.57132	4.81404	0.00275674	2.16858	9.11192	0.0154145	1.2237	2.73755	6.96298	14.6517	12.5728	14.2913	18.8964	18.5924	18.4691	10.7797	13.7254	12.3296	22.1993	21.1277	20.8436	NA	NA	NA	18.8964	18.5924	18.4691	NA	NA	NA	22.1993	21.1277	20.8436	8.08863	6.3604	11
P23634;P20020;Q01814	P23634	Homo sapiens	Plasma membrane calcium-transporting ATPase 4	ATP2B4	NA	NA	NA	NA	0	1	0.00593305	1.77956	5.98654	0.00188719	2.23127	7.92175	0.450214	0.254811	0.345515	6.95415	13.5142	14.1765	15.2608	20.4688	20.1654	20.2768	11.3508	13.3384	13.4932	21.2156	19.9558	20.7763	NA	NA	NA	20.4688	20.1654	20.2768	NA	NA	NA	21.2156	19.9558	20.7763	8.83737	85.895	77
PF3D7_0201800	PF3D7_0201800	P. falciparum 3D7	NA	NA	knob associated heat shock protein 40	1	HMM: MAIFKKYRFRENKIIFLFFIKIFLFSLFIWELCCF, NN: MAIFKKYRFRENKIIFLFFIKIFLFSLFIWELCCF	1	1	0	0.0128062	1.61666	6.40089	0.000394502	2.55885	7.47128	0.887402	0.0306903	-0.142958	6.93609	14.5823	11.7585	15.5453	20.0747	21.8956	19.1185	13.7391	12.3563	12.1506	21.1074	19.9237	19.6287	NA	NA	NA	20.0747	21.8956	19.1185	NA	NA	NA	21.1074	19.9237	19.6287	8.449	27.622	26
PF3D7_1307200	PF3D7_1307200	P. falciparum 3D7	NA	NA	DnaJ protein, putative	0	N/A	0	1	0	0.00352554	1.9162	5.95147	0.0014906	2.28404	7.87765	0.139548	0.616738	0.780402	6.91456	13.0478	13.4501	14.4792	19.6716	19.416	19.7439	11.3754	13.5679	12.5965	21.0686	20.0107	20.0933	NA	NA	NA	19.6716	19.416	19.7439	NA	NA	NA	21.0686	20.0107	20.0933	8.08415	3.4019	4
PF3D7_0113700	PF3D7_0113700	P. falciparum 3D7	NA	NA	heat shock protein 40, type II	1	HMM: MATLRKSYVPEILYFSKFFMNACFISLLIITVNCF, NN: MATLRKSYVPEILYFSKFFMNACFISLLIITVNCF	1	1	0	0.00223167	1.99426	6.58263	5.71642e-05	2.97181	7.24521	0.986057	0.00391573	-0.00808847	6.91392	13.3264	12.2247	11.2332	18.2124	19.052	19.2678	11.4013	11.2355	12.1355	19.4191	18.5091	18.5797	NA	NA	NA	18.2124	19.052	19.2678	NA	NA	NA	19.4191	18.5091	18.5797	7.81537	11.806	13
PF3D7_0220100	PF3D7_0220100	P. falciparum 3D7	NA	NA	DnaJ protein, putative	1	N/A	1	1	0	0.00571695	1.78218	6.30286	0.00884531	1.75226	7.47525	0.970062	0.0060525	0.0150249	6.88906	13.1066	14.2722	12.5334	19.7035	19.6545	19.4628	12.4726	13.6011	10.3665	20.3159	19.1901	19.3599	NA	NA	NA	19.7035	19.6545	19.4628	NA	NA	NA	20.3159	19.1901	19.3599	8.4899	23.944	41
PF3D7_0402400	PF3D7_0402400	P. falciparum 3D7	NA	NA	Plasmodium exported protein, unknown function	1	N/A	1	1	0	0.00249092	1.97251	7.93023	0.000509748	2.52973	5.65952	0.0184122	1.17234	1.7628	6.79488	13.4525	11.677	13.2736	21.0947	20.6132	20.4859	16.6023	16.6793	17.222	23.1271	21.9673	22.3878	NA	NA	NA	21.0947	20.6132	20.4859	16.6023	16.6793	17.222	23.1271	21.9673	22.3878	8.60095	40.982	35
PF3D7_0822600	PF3D7_0822600	P. falciparum 3D7	NA	NA	protein transport protein SEC23	0	N/A	1	1	0	0.00520348	1.79856	7.14251	0.00238164	2.20548	6.42791	0.0766565	0.772388	-2.29999	6.78521	13.6958	13.0852	14.989	21.0489	21.2269	20.9217	13.5324	12.0767	11.4047	19.8164	17.4716	19.0097	NA	NA	NA	21.0489	21.2269	20.9217	NA	NA	NA	19.8164	17.4716	19.0097	8.5313	18.36	33
PF3D7_1149200;PF3D7_1149500	PF3D7_1149200	P. falciparum 3D7	NA	NA	ring-infected erythrocyte surface antigen;ring-infected erythrocyte surface antigen 2, pseudogene	0;1	N/A	1	1	0	0.00579918	1.78218	6.39378	0.00122297	2.35003	6.65308	0.147612	0.601205	0.978702	6.52343	14.1978	13.3035	12.4559	19.805	19.6726	19.6609	12.879	14.8123	14.424	21.5325	20.1393	20.4027	NA	NA	NA	19.805	19.6726	19.6609	NA	NA	NA	21.5325	20.1393	20.4027	8.61122	25.495	40
PF3D7_0614300	PF3D7_0614300	P. falciparum 3D7	NA	NA	major facilitator superfamily-related transporter, putative	12	N/A	0	1	0	0.00707281	1.72444	6.36198	0.00228366	2.20552	6.67203	0.278485	0.412675	-0.289922	6.517	12.1202	13.4043	14.0857	19.722	19.5529	19.4213	12.9612	13.2447	11.6045	19.6521	19.1877	18.9866	NA	NA	NA	19.722	19.5529	19.4213	NA	NA	NA	19.6521	19.1877	18.9866	8.2388	17.286	35
PF3D7_0801000	PF3D7_0801000	P. falciparum 3D7	NA	NA	Plasmodium exported protein (PHISTc), unknown function	1	N/A	1	1	0	0.00147676	2.10082	4.70213	0.000707483	2.49229	8.3038	0.00861602	1.3224	2.37297	6.50296	14.5257	13.2823	14.6629	19.2912	19.0396	18.2465	12.6738	13.1021	13.0089	21.9695	20.8321	20.8947	NA	NA	NA	19.2912	19.0396	18.2465	NA	NA	NA	21.9695	20.8321	20.8947	8.98959	274.36	107
Q96GI7	Q96GI7	Homo sapiens	Protein FAM89A	FAM89A	NA	NA	NA	NA	0	1	0.5039	0.230709	2.25718	0.000143969	2.79251	10.4811	0.590145	0.168085	-0.138315	6.36912	24.0836	23.6995	15.5185	23.4779	23.3564	23.2389	11.9518	13.086	13.1772	23.0991	23.6336	22.9255	24.0836	23.6995	15.5185	23.4779	23.3564	23.2389	NA	NA	NA	23.0991	23.6336	22.9255	8.92588	1.927	5
PF3D7_1001600	PF3D7_1001600	P. falciparum 3D7	NA	NA	exported lipase 2	0	N/A	1	1	0	0.00809666	1.69593	4.38915	0.0016339	2.27747	8.19108	0.0156473	1.2237	3.23113	6.29011	13.5493	15.034	12.8853	18.6027	17.51	18.5233	12.7835	13.2734	13.6993	22.3089	20.2988	21.7217	NA	NA	NA	18.6027	17.51	18.5233	NA	NA	NA	22.3089	20.2988	21.7217	8.78901	58.693	41
P23276	P23276	Homo sapiens	Kell blood group glycoprotein	KEL	NA	NA	NA	NA	0	1	0.00789158	1.69707	6.46952	0.0106079	1.6848	4.97328	0.0921691	0.71859	-2.13382	5.7214	14.2646	13.0214	12.2441	19.6953	19.5569	19.6865	12.1045	13.0603	12.4526	18.5753	16.193	17.769	NA	NA	NA	19.6953	19.5569	19.6865	NA	NA	NA	18.5753	16.193	17.769	8.05983	6.8663	15
PF3D7_0500800	PF3D7_0500800	P. falciparum 3D7	NA	NA	mature parasite-infected erythrocyte surface antigen	0	N/A	1	1	0	0.00732152	1.7204	4.6478	0.00154974	2.2834	6.68767	0.0139319	1.23962	1.633	5.66774	20.1704	21.7592	21.2472	25.8784	25.7465	25.4953	21.6947	20.0746	20.1869	27.8039	27.3202	26.8951	20.1704	21.7592	21.2472	25.8784	25.7465	25.4953	21.6947	20.0746	20.1869	27.8039	27.3202	26.8951	10.7335	323.31	1483
PF3D7_1038800	PF3D7_1038800	P. falciparum 3D7	NA	NA	RESA-like protein with PHIST and DnaJ domains	1	N/A	1	1	0	0.0419146	1.16936	4.38575	0.0129917	1.62951	6.75561	0.398398	0.291645	0.347988	5.57068	12.3332	14.2143	15.6769	18.7873	18.3553	18.2391	12.4489	10.2243	13.4856	19.2683	18.2093	18.948	NA	NA	NA	18.7873	18.3553	18.2391	NA	NA	NA	19.2683	18.2093	18.948	8.13925	25.139	25
PF3D7_0830500	PF3D7_0830500	P. falciparum 3D7	NA	NA	sporozoite and liver stage tryptophan-rich protein, putative	1	N/A	1	1	0	0.00990686	1.66946	7.60422	0.0325409	1.31148	3.4244	0.0140037	1.23962	-6.57406	5.51431	13.1161	15.8862	14.8638	22.4336	22.0215	22.2237	11.7314	13.3007	11.6512	16.6139	14.0069	16.3357	NA	NA	NA	22.4336	22.0215	22.2237	NA	NA	NA	16.6139	14.0069	16.3357	8.83652	66.08	47
P23588	P23588	Homo sapiens	Eukaryotic translation initiation factor 4B	EIF4B	NA	NA	NA	NA	0	1	0.0094712	1.66946	5.33016	0.00576811	1.90015	5.28348	0.137412	0.616738	-1.63286	5.30682	13.6632	14.8399	13.0575	19.2068	19.1781	19.1661	12.4509	11.5552	12.7959	18.5892	16.2783	17.7849	NA	NA	NA	19.2068	19.1781	19.1661	NA	NA	NA	18.5892	16.2783	17.7849	7.88111	10.389	24
PF3D7_0201900	PF3D7_0201900	P. falciparum 3D7	NA	NA	erythrocyte membrane protein 3	1	HMM: MATIKKYHIRGRKNILIFLLKIFLFSPLIWILIYSE, NN: MATIKKYHIRGRKNILIFLLKIFLFSPLIWILIYSE	1	1	0	0.00259573	1.97251	4.85271	0.00840546	1.75861	5.52268	0.57637	0.172352	0.353545	5.18769	15.9565	14.5366	16.0894	20.8608	20.9491	19.3307	16.4215	14.6639	14.5478	21.0474	20.6087	20.5451	15.9565	14.5366	16.0894	20.8608	20.9491	19.3307	16.4215	14.6639	14.5478	21.0474	20.6087	20.5451	9.22791	115.21	132
O00161	O00161	Homo sapiens	Synaptosomal-associated protein 23	SNAP23	NA	NA	NA	NA	0	1	5.81918e-05	2.91292	5.91266	0.00150869	2.28404	4.43574	0.00103439	1.65539	-2.03387	5.1742	13.4658	14.0191	14.0821	19.9447	19.8262	19.5341	13.9663	13.0953	12.8346	17.8868	17.9239	17.3927	NA	NA	NA	19.9447	19.8262	19.5341	NA	NA	NA	17.8868	17.9239	17.3927	7.63338	5.6624	11
PF3D7_0202400	PF3D7_0202400	P. falciparum 3D7	NA	NA	gamete antigen 27/25, putative	0	N/A	1	1	0	0.0497144	1.10759	2.53384	0.00326781	2.11169	7.49936	0.00218608	1.56321	4.37224	5.0166	14.4894	12.3012	13.6713	16.3501	15.7698	15.9435	11.3974	13.6769	13.6077	21.0744	19.814	20.2917	NA	NA	NA	16.3501	15.7698	15.9435	NA	NA	NA	21.0744	19.814	20.2917	8.55772	81.276	47
PF3D7_0702500	PF3D7_0702500	P. falciparum 3D7	NA	NA	Plasmodium exported protein, unknown function	1	N/A	1	1	0	5.04561e-05	2.91687	4.31317	0.000670952	2.49229	5.43192	0.023019	1.13609	0.848982	4.87254	17.4536	16.9054	17.3652	21.39	21.4236	21.8501	16.3721	17.5302	17.0127	22.753	22.2961	22.1615	17.4536	16.9054	17.3652	21.39	21.4236	21.8501	16.3721	17.5302	17.0127	22.753	22.2961	22.1615	8.62244	87.771	54
Q9UPE1;Q96SB4;P78362	Q9UPE1;Q96SB4;P78362	Homo sapiens	SRSF protein kinase 3;SRSF protein kinase 1;SRSF protein kinase 2;SRSF protein kinase 2 N-terminal;SRSF protein kinase 2 C-terminal	SRPK3;SRPK1;SRPK2	NA	NA	NA	NA	0	1	0.47951	0.239633	1.93005	0.00111123	2.3821	7.48715	0.222819	0.472062	3.8308	4.7086	14.8089	12.9141	13.5601	20.0725	12.8567	14.1441	12.7277	10.7162	12.6604	20.3703	18.5719	19.6235	NA	NA	NA	20.0725	NA	NA	NA	NA	NA	20.3703	18.5719	19.6235	8.03985	2.2585	7
Q14571	Q14571	Homo sapiens	Inositol 1,4,5-trisphosphate receptor type 2	ITPR2	NA	NA	NA	NA	0	1	0.483367	0.239633	0.888851	0.0037477	2.05826	8.51915	0.00650976	1.3224	6.26305	4.704	13.4786	14.3648	11.9711	15.4368	14.637	12.4072	11.1755	10.6119	13.9253	21.6836	19.3481	20.2384	NA	NA	NA	NA	NA	NA	NA	NA	NA	21.6836	19.3481	20.2384	9.00932	2.3336	2
PF3D7_1477000	PF3D7_1477000	P. falciparum 3D7	NA	NA	Plasmodium exported protein (hyp17), unknown function, pseudogene	2	N/A	0	1	0	0.054054	1.08719	3.29683	0.000740122	2.48517	6.06198	0.244994	0.446234	0.594485	4.67941	16.0908	13.6023	13.6201	17.9081	17.8282	17.4675	12.0558	11.568	13.1774	18.9608	17.6785	18.3478	16.0908	NA	NA	17.9081	17.8282	17.4675	NA	NA	NA	18.9608	17.6785	18.3478	7.9347	4.3679	7
Q9H095	Q9H095	Homo sapiens	IQ domain-containing protein G	IQCG	NA	NA	NA	NA	0	1	0.714327	0.118362	0.396112	0.00208493	2.21936	8.75926	0.000403128	1.80027	7.92859	4.57769	11.2374	11.9403	14.1768	13.2999	13.2273	12.0156	11.7008	11.1443	13.2057	21.2067	20.4499	20.6719	NA	NA	NA	NA	NA	NA	NA	NA	NA	21.2067	20.4499	20.6719	8.29433	2.1917	2
P17066;P48741	P17066;P48741	Homo sapiens	Heat shock 70 kDa protein 6;Putative heat shock 70 kDa protein 7	HSPA6;HSPA7	NA	NA	NA	NA	0	1	0.00677478	1.73619	3.76554	0.0399326	1.24155	5.27264	0.544078	0.194366	0.218808	4.51909	13.6367	12.926	14.3068	17.3517	17.1951	17.6192	13.651	13.373	9.98053	18.151	17.154	17.5175	NA	NA	NA	17.3517	17.1951	17.6192	NA	NA	NA	18.151	17.154	17.5175	7.72855	2.0207	4
Q8NHG7	Q8NHG7	Homo sapiens	Small VCP/p97-interacting protein	SVIP	NA	NA	NA	NA	0	1	0.00142631	2.10082	7.74646	0.442917	0.315889	0.970628	0.00883261	1.3224	-6.80136	4.35855	13.333	13.166	12.1294	20.7377	20.4389	20.6912	11.7697	12.1328	14.6494	14.4064	14.5893	12.468	NA	NA	NA	20.7377	20.4389	20.6912	NA	NA	NA	NA	NA	NA	7.28517	1.9549	1
PF3D7_1236100	PF3D7_1236100	P. falciparum 3D7	NA	NA	clustered-asparagine-rich protein	0	N/A	0	1	0	0.0179154	1.49919	4.28994	0.00873602	1.75246	4.42143	0.477792	0.235791	-0.529028	4.35568	14.3677	12.5006	12.7674	17.5289	17.5018	17.4747	11.1886	13.2967	13.1688	16.5429	16.1973	18.1781	NA	NA	NA	17.5289	NA	17.4747	NA	NA	NA	16.5429	16.1973	18.1781	7.20876	2.649	4
PF3D7_1436300	PF3D7_1436300	P. falciparum 3D7	NA	NA	translocon component PTEX150	0	HMM: MRIIILALLIVCTIINYYCAV, NN: MRIIILALLIVCTIINYYCAV	0	1	0	0.010066	1.66946	7.43788	0.0695741	1.03649	1.26974	0.0022843	1.56321	-5.22498	4.35381	15.2922	12.8909	12.9266	21.3676	21.0298	21.0259	14.6464	14.6357	14.6571	16.2781	15.2087	16.2616	NA	NA	NA	21.3676	21.0298	21.0259	NA	14.6357	14.6571	16.2781	15.2087	16.2616	8.44962	77.31	45
Q9H4G4	Q9H4G4	Homo sapiens	Golgi-associated plant pathogenesis-related protein 1	GLIPR2	NA	NA	NA	NA	0	1	0.00423626	1.86371	3.66788	0.00421138	2.01617	4.81095	0.194496	0.523206	-0.957825	4.23942	13.9264	15.4587	14.7125	18.9002	18.0918	18.1092	13.7964	11.779	12.2195	18.4256	16.814	16.9882	NA	NA	NA	18.9002	18.0918	18.1092	NA	NA	NA	18.4256	16.814	16.9882	7.16835	2.1154	5
PF3D7_0301600	PF3D7_0301600	P. falciparum 3D7	NA	NA	Plasmodium exported protein (hyp1), unknown function	1	N/A	1	1	0	0.0148721	1.56611	2.19888	0.000982427	2.41586	5.92939	0.0260827	1.10653	2.52097	4.06414	14.4994	13.2119	14.1366	16.5358	15.978	15.9307	12.8576	13.3882	11.9735	19.6488	17.9563	18.4024	NA	NA	NA	16.5358	15.978	15.9307	NA	NA	NA	19.6488	17.9563	18.4024	7.92814	11.648	13
PF3D7_0501200	PF3D7_0501200	P. falciparum 3D7	NA	NA	parasite-infected erythrocyte surface protein	3	HMM: MLLFFAKLVVFTFFFWLLKYGKTR, NN: MLLFFAKLVVFTFFFWLLKYGKTRSY	1	1	0	0.0516092	1.09939	4.84514	0.00151651	2.28404	2.97753	0.00132459	1.65261	2.52021	3.91134	14.4178	11.0038	14.5893	18.4386	18.1502	17.9576	17.7248	17.8997	17.5499	20.9497	20.268	20.8892	NA	NA	NA	18.4386	18.1502	17.9576	NA	17.8997	17.5499	20.9497	20.268	20.8892	8.24162	18.393	30
PF3D7_1102500	PF3D7_1102500	P. falciparum 3D7	NA	NA	Plasmodium exported protein (PHISTb), unknown function	1	N/A	1	1	0	0.0386944	1.19988	4.73693	0.0213795	1.46173	2.97726	0.378744	0.310289	1.15355	3.8571	13.0318	13.5872	13.3133	19.1192	16.0531	18.9708	16.4479	16.0001	16.224	19.954	18.2562	19.3935	NA	NA	NA	19.1192	16.0531	18.9708	16.4479	16.0001	NA	19.954	18.2562	19.3935	8.20011	16.239	20
PF3D7_0201600	PF3D7_0201600	P. falciparum 3D7	NA	NA	PHISTb domain-containing RESA-like protein 1	1	N/A	1	1	0	0.0161105	1.54071	2.68335	0.000465336	2.53374	5.00452	0.00948862	1.3224	1.76342	3.84394	13.9499	14.4221	12.8335	16.5958	16.682	15.9778	12.5164	13.7066	13.3094	18.7352	18.0275	17.7832	NA	NA	NA	16.5958	16.682	15.9778	NA	NA	NA	18.7352	18.0275	17.7832	7.54054	5.5817	6
P16157;Q01484	P16157	Homo sapiens	Ankyrin-1	ANK1	NA	NA	NA	NA	0	1	6.67883e-06	3.28692	4.04335	0.0132116	1.62686	3.63076	0.843493	0.0500065	-0.111892	3.83705	19.6796	19.8341	19.9854	23.7529	23.893	23.9833	20.3641	19.8874	20.1497	24.6116	22.8908	23.7912	19.6796	19.8341	19.9854	23.7529	23.893	23.9833	20.3641	19.8874	20.1497	24.6116	22.8908	23.7912	10.0306	323.31	546
P02730	P02730	Homo sapiens	Band 3 anion transport protein	SLC4A1	NA	NA	NA	NA	0	1	0.00025771	2.49785	4.08426	0.0138313	1.61155	3.57033	0.78655	0.073596	-0.0923918	3.82729	20.8433	20.5795	20.567	25.0288	24.7899	24.4238	19.9242	21.7559	21.5743	25.1782	24.3535	24.4336	20.8433	20.5795	20.567	25.0288	24.7899	24.4238	19.9242	21.7559	21.5743	25.1782	24.3535	24.4336	9.89112	142.06	118
PF3D7_1447900	PF3D7_1447900	P. falciparum 3D7	NA	NA	multidrug resistance protein 2	10	N/A	0	1	0	0.0509967	1.10057	3.10434	0.00240445	2.20548	4.50213	0.460033	0.248623	0.719112	3.80324	12.9073	12.8903	13.2677	16.6208	17.1139	14.6437	12.7067	12.228	12.0946	17.4441	16.9883	16.1033	NA	NA	NA	16.6208	17.1139	14.6437	NA	NA	NA	17.4441	16.9883	16.1033	7.59845	16.302	18
PF3D7_0831500	PF3D7_0831500	P. falciparum 3D7	NA	NA	Plasmodium exported protein (PHIST), unknown function	0	N/A	1	1	0	0.190225	0.609367	0.377858	0.000677857	2.49229	7.21521	0.000958734	1.65539	7.2626	3.79654	13.6737	13.8415	13.4955	13.7	14.0542	14.39	12.984	14.6733	14.6291	20.4546	21.552	21.9254	NA	NA	NA	NA	NA	NA	NA	NA	NA	20.4546	21.552	21.9254	8.47589	21.723	19
PF3D7_0831600	PF3D7_0831600	P. falciparum 3D7	NA	NA	cytoadherence linked asexual protein 8	0	HMM: MISYFKVVVFIIFFFLFLKRRVICS, NN: MISYFKVVVFIIFFFLFLKRRVICS	0	1	0	0.00736552	1.7204	3.43542	0.0348158	1.28982	4.04272	0.635852	0.144521	0.303602	3.73907	14.5523	13.3855	13.0426	16.6333	18.0997	16.5537	11.638	14.6243	13.807	17.8856	16.8689	17.4429	NA	NA	NA	16.6333	18.0997	16.5537	NA	NA	NA	17.8856	16.8689	17.4429	7.97656	17.494	19
Q96RT1	Q96RT1	Homo sapiens	Protein LAP2	ERBB2IP	NA	NA	NA	NA	0	1	0.012128	1.63309	5.78849	0.129206	0.803285	1.52245	0.00757542	1.3224	-4.36852	3.65547	11.997	14.8235	11.8659	17.9653	19.7349	18.3518	13.0438	13.7537	11.5816	14.6862	14.3155	13.9447	NA	NA	NA	17.9653	19.7349	18.3518	NA	NA	NA	14.6862	NA	13.9447	8.0876	24.883	26
PF3D7_1002100	PF3D7_1002100	P. falciparum 3D7	NA	NA	EMP1-trafficking protein	1	N/A	1	1	0	0.0963889	0.859339	3.47021	0.0939185	0.932274	3.77146	0.906251	0.0242682	0.223512	3.62083	12.9283	12.3842	13.846	15.4707	15.0869	19.0116	12.8173	13.37	12.738	18.7636	17.0782	14.3978	NA	NA	NA	15.4707	15.0869	19.0116	12.8173	13.37	12.738	18.7636	17.0782	14.3978	7.72779	3.8525	9
P35240	P35240	Homo sapiens	Merlin	NF2	NA	NA	NA	NA	0	1	0.0236455	1.39217	2.98299	0.0323694	1.31148	3.99032	0.757401	0.0856968	-0.319378	3.48666	15.7969	13.8811	14.4231	18.8141	17.5235	16.7124	13.3036	13.3302	13.4871	18.6446	17.3786	16.0687	NA	NA	NA	18.8141	17.5235	16.7124	NA	NA	NA	18.6446	17.3786	16.0687	7.72523	5.1364	7
PF3D7_0107500	PF3D7_0107500	P. falciparum 3D7	NA	NA	lipid/sterol:H+ symporter	12	N/A	0	1	0	0.000902168	2.23438	3.84857	0.0746113	1.02246	3.08265	0.27263	0.412675	-1.46273	3.46561	13.4539	14.1162	13.12	17.7066	17.4551	17.0741	12.867	14.2641	11.4686	17.2272	14.0208	16.5996	NA	NA	NA	17.7066	17.4551	17.0741	NA	NA	NA	17.2272	14.0208	16.5996	7.73262	7.9528	16
Q14254	Q14254	Homo sapiens	Flotillin-2	FLOT2	NA	NA	NA	NA	0	1	0.00332024	1.92562	3.27099	0.0121706	1.64362	3.64928	0.418732	0.279859	-0.32348	3.46014	13.7905	12.8355	12.4836	16.6685	16.5654	15.6887	13.2131	11.5204	12.2708	15.7342	15.9841	16.2339	NA	NA	NA	16.6685	16.5654	15.6887	NA	NA	NA	15.7342	NA	16.2339	7.0943	4.342	5
PF3D7_1149600	PF3D7_1149600	P. falciparum 3D7	NA	NA	DnaJ protein, putative	1	N/A	1	1	0	0.0326977	1.25581	4.86928	0.258662	0.53222	2.03944	0.135895	0.616738	-3.14249	3.45436	12.2451	15.0886	12.4229	17.9504	18.1349	18.2791	13.9101	13.3215	11.5871	17.5687	13.5124	13.8559	NA	NA	NA	17.9504	18.1349	18.2791	NA	NA	NA	17.5687	NA	NA	7.49638	6.7339	10
PF3D7_0508900	PF3D7_0508900	P. falciparum 3D7	NA	NA	conserved Plasmodium protein, unknown function	0	N/A	0	1	0	0.0342103	1.24053	2.2298	8.88748e-05	2.83249	4.58209	0.0579152	0.856997	-0.667636	3.40594	13.7539	14.749	15.2078	16.8663	16.8	16.7338	11.8592	11.1535	11.6383	15.8679	16.0605	16.4687	NA	NA	NA	16.8663	NA	16.7338	11.8592	11.1535	11.6383	15.8679	16.0605	16.4687	7.93314	3.677	8
Q99469	Q99469	Homo sapiens	SH3 and cysteine-rich domain-containing protein	STAC	NA	NA	NA	NA	0	1	0.00176692	2.04599	5.69414	0.40984	0.346767	1.11762	0.0200281	1.14515	-5.86288	3.40588	15.2587	14.3299	13.6817	20.2966	19.6716	20.3845	12.0222	12.7948	14.5943	16.1303	13.411	13.2229	NA	NA	NA	20.2966	19.6716	20.3845	NA	NA	NA	16.1303	NA	NA	7.9517	2.2091	10
PF3D7_0628100	PF3D7_0628100	P. falciparum 3D7	NA	NA	HECT-domain (ubiquitin-transferase), putative	2	N/A	0	1	0	0.0971031	0.859339	2.6265	0.00160579	2.27747	4.16596	0.734158	0.0962732	0.378282	3.39623	12.1483	13.9894	14.5733	15.4352	18.0759	15.0794	11.8745	12.154	13.1989	16.1676	17.1663	16.3915	NA	NA	NA	15.4352	18.0759	15.0794	NA	NA	NA	16.1676	17.1663	16.3915	8.61434	2.6761	12
PF3D7_1200800	PF3D7_1200800	P. falciparum 3D7	NA	NA	serine/threonine protein kinase, FIKK family	1	HMM: MYILRNMFCIKFMLYFLWLLYLLFLN, NN: MYILRNMFCIKFMLYFLWLLYLLFLNIEFIKFK	1	1	0	0.0635812	1.02444	2.32687	0.0107008	1.6848	4.39969	0.175389	0.552557	1.37125	3.36328	14.7443	14.7871	12.7236	16.4119	16.8101	16.0137	14.5001	13.5305	12.1198	19.0658	16.7148	17.5688	NA	NA	NA	NA	16.8101	16.0137	NA	NA	NA	19.0658	16.7148	17.5688	7.61506	13.719	10
P28289	P28289	Homo sapiens	Tropomodulin-1	TMOD1	NA	NA	NA	NA	0	1	0.000470512	2.35824	6.38646	0.648165	0.164402	0.307605	0.0015988	1.61229	-6.41769	3.34703	14.0412	12.6913	12.9253	19.3743	20.162	19.2809	12.2905	13.3765	12.9744	13.5813	13.8366	12.1463	NA	NA	NA	19.3743	20.162	19.2809	NA	NA	NA	NA	NA	NA	7.66374	7.35	8
PF3D7_1115800	PF3D7_1115800	P. falciparum 3D7	NA	NA	conserved Plasmodium protein, unknown function	0	N/A	1	1	0	0.00264834	1.97251	4.68253	0.0705971	1.03649	1.98912	0.182183	0.547606	-1.28344	3.33582	13.3154	12.3697	12.8475	18.1122	16.586	17.8819	13.8359	14.6902	14.2364	15.4319	17.4708	15.8271	NA	NA	NA	18.1122	16.586	17.8819	13.8359	14.6902	14.2364	15.4319	17.4708	15.8271	7.34003	9.1237	10
PF3D7_1227500	PF3D7_1227500	P. falciparum 3D7	NA	NA	conserved Plasmodium protein, unknown function	2	N/A	0	1	0	0.00943789	1.66946	6.32575	0.605326	0.191359	0.292782	1.73561e-05	2.99655	-5.89168	3.30927	14.1414	13.1034	11.7971	19.5905	19.2143	19.2143	12.558	14.1045	12.8032	13.5381	13.3021	13.5039	NA	NA	NA	19.5905	19.2143	19.2143	NA	NA	NA	NA	NA	NA	8.3928	2.2141	4
PF3D7_0523000	PF3D7_0523000	P. falciparum 3D7	NA	NA	multidrug resistance protein 1	11	N/A	0	1	0	0.0369488	1.21141	6.0371	0.407831	0.346767	0.541656	0.0304955	1.06861	-2.85592	3.28938	13.0254	13.4686	16.8162	20.4053	20.5583	20.4579	17.0331	17.37	16.8257	18.1595	16.5834	18.1109	NA	NA	16.8162	20.4053	20.5583	20.4579	17.0331	17.37	16.8257	18.1595	16.5834	18.1109	8.55818	38.536	66
PF3D7_1349200	PF3D7_1349200	P. falciparum 3D7	NA	NA	glutamate--tRNA ligase, putative	0	N/A	0	1	0	0.431187	0.273563	0.635951	0.000429914	2.53925	5.74393	0.022893	1.13609	3.59288	3.18994	13.4172	13.8833	13.0347	14.8437	12.8124	14.587	11.2835	12.3234	12.1831	18.0015	17.6673	17.353	NA	NA	NA	NA	NA	NA	NA	NA	NA	18.0015	17.6673	17.353	7.63629	3.2669	1
PF3D7_1327500	PF3D7_1327500	P. falciparum 3D7	NA	NA	conserved Plasmodium protein, unknown function	0	N/A	0	1	0	0.0111364	1.64703	4.62692	0.318755	0.450211	1.74021	0.0677225	0.80129	-0.769832	3.18357	13.0653	13.6245	14.8732	18.6727	18.3953	18.3758	18.6171	14.7918	14.5049	18.1864	17.4632	17.4846	NA	NA	NA	18.6727	18.3953	18.3758	18.6171	14.7918	14.5049	18.1864	17.4632	17.4846	8.10517	2.1819	6
Q9Y4A0	Q9Y4A0	Homo sapiens	Jerky protein homolog-like	JRKL	NA	NA	NA	NA	0	1	0.939301	0.0140736	0.1722	0.000578048	2.50409	6.112	0.0975713	0.705957	5.65743	3.1421	13.1322	14.6438	13.3078	17.7919	12.195	11.6135	12.9524	14.3186	12.9657	20.3047	19.0502	19.2178	NA	NA	NA	17.7919	NA	NA	NA	NA	NA	20.3047	19.0502	19.2178	7.96384	2.4148	4
P11277;Q01082;O15020	P11277	Homo sapiens	Spectrin beta chain, erythrocytic	SPTB	NA	NA	NA	NA	0	1	0.00317773	1.92579	4.6894	0.0397164	1.24155	1.59411	0.0092441	1.3224	-1.89359	3.14175	17.8727	18.7816	18.7865	23.1049	23.1166	23.2874	18.8728	20.0011	20.1719	21.6727	20.9168	21.2388	17.8727	18.7816	18.7865	23.1049	23.1166	23.2874	18.8728	20.0011	20.1719	21.6727	20.9168	21.2388	9.75159	323.31	495
PF3D7_1228800	PF3D7_1228800	P. falciparum 3D7	NA	NA	WD repeat-containing protein, putative	1	N/A	0	1	0	0.0521006	1.09924	5.8093	0.737206	0.116617	0.465572	0.0291907	1.0803	-4.64301	3.13744	11.9811	10.524	15.203	18.3712	18.3086	18.4563	11.5377	13.2701	15.0025	13.7577	15.1367	12.3126	NA	NA	NA	18.3712	18.3086	18.4563	11.5377	NA	15.0025	NA	NA	NA	8.16888	2.194	2
O95819	O95819	Homo sapiens	Mitogen-activated protein kinase kinase kinase kinase 4	MAP4K4	NA	NA	NA	NA	0	1	0.14854	0.695996	-1.53121	0.000571856	2.50409	7.78777	0.00210287	1.56321	6.93674	3.12828	16.0484	16.1042	16.16	14.9166	15.5188	13.2835	13.1293	13.203	14.8335	22.1975	21.5195	20.8121	16.0484	NA	16.16	NA	NA	NA	NA	NA	NA	22.1975	21.5195	20.8121	8.8703	2.7625	1
PF3D7_0905400	PF3D7_0905400	P. falciparum 3D7	NA	NA	high molecular weight rhoptry protein 3	0	HMM: MRSKHLVTLFIITFLSFSTVKVWGK, NN: MRSKHLVTLFIITFLSFSTVKVWGK	1	1	0	0.0102995	1.66496	3.05741	0.00229912	2.20552	3.08013	0.410182	0.285566	0.341795	3.06877	21.3829	20.6709	20.2696	23.9108	23.7899	23.7948	20.5609	21.5241	21.1955	24.8276	23.76	23.9335	21.3829	20.6709	20.2696	23.9108	23.7899	23.7948	20.5609	21.5241	21.1955	24.8276	23.76	23.9335	9.82006	323.31	352
PF3D7_0304200	PF3D7_0304200	P. falciparum 3D7	NA	NA	EH domain-containing protein	0	N/A	0	1	0	0.000563691	2.32468	4.72342	0.157672	0.732273	1.23443	0.00105291	1.65539	-3.38193	2.97892	12.178	13.3219	12.5569	17.477	17.7913	16.9587	12.1567	13.9621	12.2591	14.3	14.3426	13.4386	NA	NA	NA	17.477	17.7913	16.9587	NA	NA	NA	14.3	14.3426	13.4386	7.31511	5.1648	8
PF3D7_1124600	PF3D7_1124600	P. falciparum 3D7	NA	NA	ethanolamine kinase	0	N/A	1	1	0	0.277875	0.454692	1.38932	0.0141034	1.60764	4.48092	0.144513	0.606011	2.21702	2.93512	13.2833	12.3969	14.1801	16.5229	13.8839	13.6215	12.0724	11.869	13.2952	15.3736	18.0273	17.2785	NA	NA	NA	16.5229	NA	NA	NA	NA	NA	15.3736	18.0273	17.2785	7.26593	4.732	5
Q15223	Q15223	Homo sapiens	Nectin-1	PVRL1	NA	NA	NA	NA	0	1	0.0437612	1.15479	2.11097	0.0168239	1.55309	3.70629	0.0898142	0.724436	-0.750195	2.90863	15.9602	14.4191	14.4625	17.2733	16.7719	17.1295	12.8642	13.5538	11.3872	16.7754	16.308	15.8407	NA	NA	NA	17.2733	16.7719	17.1295	NA	NA	NA	16.7754	NA	15.8407	7.20575	34.455	7
P11166	P11166	Homo sapiens	Solute carrier family 2, facilitated glucose transporter member 1	SLC2A1	NA	NA	NA	NA	0	1	0.0100621	1.66946	2.72661	0.0579603	1.0993	2.98268	0.321138	0.36142	-1.1326	2.85464	21.5095	21.2498	22.6672	24.4339	23.903	25.2694	20.6599	19.7442	20.8564	24.6066	21.7462	23.8557	21.5095	21.2498	22.6672	24.4339	23.903	25.2694	20.6599	19.7442	20.8564	24.6066	21.7462	23.8557	9.32461	34.414	79
PF3D7_0302500;PF3D7_0302200	PF3D7_0302500;PF3D7_0302200	P. falciparum 3D7	NA	NA	cytoadherence linked asexual protein 3.1;cytoadherence linked asexual protein 3.2	0	HMM: MVSFFKTPIFILIIFLYLNEKVICS, NN: MVSFFKTPIFILIIFLYLNEKVICS;HMM: MVSFFKTPIIIFFFLLCLNEKVLCS, NN: MVSFFKTPIIIFFFLLCLNEKVLCS	1	1	0	0.0115471	1.64614	1.96121	0.00278585	2.16858	3.59677	0.132068	0.620332	0.896762	2.77899	20.1743	19.3995	19.9351	21.7277	21.8638	21.8011	18.2937	19.4992	19.4997	23.234	21.9974	22.8515	20.1743	19.3995	19.9351	21.7277	21.8638	21.8011	18.2937	19.4992	19.4997	23.234	21.9974	22.8515	9.55981	217.53	235
PF3D7_0532400	PF3D7_0532400	P. falciparum 3D7	NA	NA	lysine-rich membrane-associated PHISTb protein	1	N/A	1	1	0	0.0114152	1.64614	2.15076	0.0701202	1.03649	3.35846	0.401638	0.29143	0.345052	2.75461	22.1032	22.7299	23.077	24.9581	24.741	24.6632	23.7617	20.3618	21.1986	25.782	24.8398	24.7757	22.1032	22.7299	23.077	24.9581	24.741	24.6632	23.7617	20.3618	21.1986	25.782	24.8398	24.7757	9.81031	323.31	258
PF3D7_1101700;PF3D7_1039700;PF3D7_0222100;PF3D7_0114100;PF3D7_0631400;PF3D7_0601200;PF3D7_0701600;PF3D7_0101300	PF3D7_1101700;PF3D7_1039700;PF3D7_0222100;PF3D7_0114100;PF3D7_0631400;PF3D7_0601200;PF3D7_0701600;PF3D7_0101300	P. falciparum 3D7	NA	NA	Pfmc-2TM Maurer's cleft two transmembrane protein	3	HMM: MFHYIYKIYIFTIILCASNLF, NN: MFHYIYKIYIFTIILCASNLF	1	1	0	0.108062	0.820199	3.3174	0.00208617	2.21936	2.10967	0.955579	0.00661192	0.0125563	2.71354	13.6638	13.9449	17.4284	18.2515	18.0496	18.6882	15.9153	16.5233	16.2594	18.4871	18.3423	18.1975	NA	NA	17.4284	18.2515	18.0496	18.6882	15.9153	16.5233	16.2594	18.4871	NA	18.1975	7.35965	2.6443	6
PF3D7_1129900	PF3D7_1129900	P. falciparum 3D7	NA	NA	major facilitator superfamily-related transporter, putative	12	N/A	0	1	0	0.0448591	1.14815	2.25336	0.0452801	1.19433	3.16841	0.942296	0.0100184	-0.0344518	2.71089	13.7008	13.7695	15.5676	17.0991	16.8477	15.8511	12.2729	14.8703	13.0462	16.7555	16.8152	16.1239	NA	NA	NA	17.0991	16.8477	15.8511	NA	NA	NA	16.7555	16.8152	16.1239	7.25667	4.9473	6
A6NGD5;P0CG00	A6NGD5;P0CG00	Homo sapiens	Zinc finger and SCAN domain-containing protein 5C;Putative zinc finger and SCAN domain-containing protein 5D	ZSCAN5C;ZSCAN5DP	NA	NA	NA	NA	0	1	0.0096988	1.66946	3.3525	0.0728729	1.02607	2.00087	0.00647295	1.3224	-3.53183	2.67669	13.0528	14.8396	14.4541	17.1874	16.8703	18.3462	11.2539	13.2121	11.3399	13.1096	13.8617	14.8373	NA	NA	NA	17.1874	16.8703	18.3462	NA	NA	NA	NA	NA	NA	7.03193	2.0019	1
PF3D7_0935900	PF3D7_0935900	P. falciparum 3D7	NA	NA	ring-exported protein 1	1	N/A	1	1	0	0.0188006	1.48279	3.32428	0.00452423	1.99421	2.02637	0.098404	0.705957	0.724695	2.67532	15.4788	16.9244	17.0012	19.9675	19.7392	19.6706	18.2764	18.9236	18.2722	20.9888	20.4851	20.0774	15.4788	16.9244	17.0012	19.9675	19.7392	19.6706	18.2764	18.9236	18.2722	20.9888	20.4851	20.0774	8.5693	43.91	55
PF3D7_0424600	PF3D7_0424600	P. falciparum 3D7	NA	NA	Plasmodium exported protein (PHISTb), unknown function	0	N/A	1	1	0	0.00619309	1.76811	9.19147	0.0384045	1.25101	-3.9038	0.00814565	1.3224	-7.49888	2.64384	11.5188	14.5462	12.419	22.2535	22.2823	21.5227	18.7844	18.1771	18.3117	16.0736	13.1728	14.3154	NA	NA	NA	22.2535	22.2823	21.5227	18.7844	18.1771	18.3117	16.0736	NA	NA	8.29079	7.5858	13
O15440	O15440	Homo sapiens	Multidrug resistance-associated protein 5	ABCC5	NA	NA	NA	NA	0	1	0.0383059	1.20003	2.99814	0.156314	0.732982	2.1664	0.0218976	1.13609	-0.657655	2.58227	13.6569	12.0176	14.1017	16.3765	16.0316	16.3625	11.9878	15.3129	12.9977	15.8357	15.5992	15.3627	NA	NA	NA	16.3765	16.0316	16.3625	NA	NA	NA	15.8357	NA	15.3627	7.41098	8.779	14
PF3D7_1201000	PF3D7_1201000	P. falciparum 3D7	NA	NA	Plasmodium exported protein (PHISTb), unknown function	0	HMM: MYSALRSFLFRKSVVSVIGVLVALLNNECS, NN: MYSALRSFLFRKSVVSVIGV	1	1	0	0.571268	0.182204	0.34289	0.0128398	1.62992	4.72184	0.00624318	1.3224	4.2042	2.53236	13.2165	13.5194	13.1581	14.65	13.058	13.2147	11.8665	14.1821	13.3212	18.2802	17.5142	17.7409	NA	NA	NA	NA	NA	NA	NA	NA	NA	18.2802	17.5142	17.7409	7.42991	4.7342	4
PF3D7_1238800	PF3D7_1238800	P. falciparum 3D7	NA	NA	acyl-CoA synthetase	0	N/A	0	1	0	0.00266338	1.97251	3.01632	0.0582503	1.0993	2.01615	0.798772	0.0709249	-0.180275	2.51624	14.2108	13.122	13.9536	16.394	17.163	16.7785	13.7301	15.197	14.8191	17.5456	15.4934	16.7555	NA	NA	NA	16.394	17.163	NA	13.7301	15.197	14.8191	17.5456	15.4934	16.7555	7.46873	5.2527	7
PF3D7_1211900	PF3D7_1211900	P. falciparum 3D7	NA	NA	non-SERCA-type Ca2+ -transporting P-ATPase	8	N/A	0	1	0	0.00890268	1.67027	1.77534	0.00208422	2.21936	3.23024	0.132691	0.620332	0.736768	2.50279	14.5944	14.734	15.3018	17.1881	16.2316	16.5366	14.8324	13.7626	13.8809	17.9016	16.9821	17.2829	14.5944	14.734	15.3018	17.1881	16.2316	16.5366	14.8324	13.7626	13.8809	17.9016	16.9821	17.2829	7.89512	8.3992	18
PF3D7_1233600	PF3D7_1233600	P. falciparum 3D7	NA	NA	asparagine and aspartate rich protein 1	0	N/A	0	1	0	0.173548	0.642481	1.58954	0.0334507	1.30336	3.395	0.00260376	1.56321	2.59277	2.49227	12.9756	11.2074	13.9089	14.7675	14.272	13.821	12.6131	12.8607	14.98	17.2992	16.9781	16.3614	NA	NA	NA	NA	NA	NA	NA	NA	NA	17.2992	16.9781	16.3614	8.12678	1.911	1
PF3D7_0501300	PF3D7_0501300	P. falciparum 3D7	NA	NA	skeleton-binding protein 1	1	N/A	1	1	0	0.0600072	1.04571	1.8254	0.0010526	2.39588	2.8857	1.79994e-05	2.99655	6.78379	2.35555	13.494	12.7237	11.6686	14.6312	14.0493	14.682	18.3523	18.5225	18.182	21.2111	21.591	20.9117	NA	NA	NA	NA	NA	NA	NA	18.5225	18.182	21.2111	21.591	20.9117	7.92137	14.088	3
P16452	P16452	Homo sapiens	Erythrocyte membrane protein band 4.2	EPB42	NA	NA	NA	NA	0	1	0.0830008	0.916306	2.97324	0.00211927	2.21936	1.69627	0.0445794	0.929105	-0.480992	2.33476	16.2499	17.8627	14.6371	19.4692	19.1635	19.0368	17.2921	17.0459	16.7997	18.8713	18.7111	18.6441	NA	17.8627	14.6371	19.4692	19.1635	19.0368	17.2921	NA	16.7997	18.8713	18.7111	18.6441	8.19429	38.731	26
PF3D7_1477500	PF3D7_1477500	P. falciparum 3D7	NA	NA	Plasmodium exported protein (PHISTb), unknown function	1	N/A	1	1	0	0.716121	0.118362	-0.351086	0.000895612	2.42654	4.95784	0.0140557	1.23962	3.96632	2.30338	13.835	14.6413	12.516	14.5626	13.0087	12.3676	12.8884	12.5359	11.5401	17.8655	16.9442	17.0282	NA	NA	NA	NA	NA	NA	NA	NA	NA	17.8655	16.9442	17.0282	7.2895	2.6357	3
PF3D7_0112200	PF3D7_0112200	P. falciparum 3D7	NA	NA	multidrug resistance-associated protein 1	11	N/A	1	1	0	0.169941	0.644764	0.836472	0.004675	1.98572	3.72008	0.0206269	1.1415	2.21105	2.27828	13.4343	14.7849	13.8197	14.7932	14.4055	15.3496	12.5224	14.1489	13.3499	17.461	16.1589	17.5616	NA	NA	NA	14.7932	14.4055	15.3496	NA	NA	NA	17.461	16.1589	17.5616	7.90598	13.179	14
Q9NRL2	Q9NRL2	Homo sapiens	Bromodomain adjacent to zinc finger domain protein 1A	BAZ1A	NA	NA	NA	NA	0	1	0.00019186	2.56499	3.88525	0.529849	0.243663	0.567592	0.0135177	1.23962	-3.78001	2.22642	13.5893	13.5097	14.0673	17.7323	17.405	17.6848	12.9877	12.2822	14.5094	14.6658	12.9665	13.8499	NA	NA	NA	17.7323	17.405	17.6848	NA	NA	NA	NA	NA	NA	7.61478	4.9438	5
PF3D7_1002200	PF3D7_1002200	P. falciparum 3D7	NA	NA	tryptophan-rich antigen 3	1	N/A	0	1	0	0.50108	0.230709	-0.40676	0.0156327	1.57188	4.72725	0.000471401	1.80027	4.57364	2.16024	13.2964	13.804	12.221	12.9087	13.0197	12.1728	11.5028	14.0818	12.0558	16.6342	17.6449	17.543	NA	NA	NA	12.9087	13.0197	12.1728	NA	NA	NA	16.6342	17.6449	17.543	7.61481	16.508	13
PF3D7_0704300	PF3D7_0704300	P. falciparum 3D7	NA	NA	conserved Plasmodium membrane protein, unknown function	4	HMM: MEKNKYDIEVSENNRFLFNKQRDWPRITFTFLVFVLGIKTVLCI, NN: MEKNKYDIEVSENNRFLFNKQRDWPRITFTFLVFVLGIKTVLCI	0	1	0	0.00061032	2.32106	-1.56097	0.000904441	2.42654	5.81106	0.103252	0.690213	1.20201	2.12505	20.2596	20.0689	20.4503	18.9267	18.6089	18.5604	14.0896	13.6178	14.5615	20.5772	19.0775	20.0474	NA	20.0689	20.4503	18.9267	18.6089	18.5604	NA	13.6178	14.5615	20.5772	19.0775	20.0474	8.84558	93.798	97
PF3D7_0807500	PF3D7_0807500	P. falciparum 3D7	NA	NA	proteasome subunit alpha type-6, putative	0	N/A	0	1	0	0.522455	0.21801	-0.479951	0.012648	1.63171	4.58942	0.0128785	1.23962	3.87516	2.05474	14.2151	13.2512	14.6733	14.4716	13.6174	12.6107	12.9175	13.8748	11.7646	17.7347	17.1709	17.4196	NA	NA	NA	NA	NA	NA	NA	NA	NA	17.7347	17.1709	17.4196	7.11644	3.0119	3
PF3D7_1149100.2-p1;PF3D7_1149100	PF3D7_1149100.2-p1;PF3D7_1149100	P. falciparum 3D7	NA	NA	Plasmodium exported protein, unknown function	0	N/A	NA	1	0	0.212098	0.565425	0.62468	0.0244985	1.41494	3.35884	0.0828614	0.753966	1.93317	1.99176	16.6095	15.6455	15.8864	17.2825	16.3647	16.3683	14.5229	16.6162	14.5994	18.415	19.8384	17.5616	16.6095	15.6455	15.8864	17.2825	16.3647	16.3683	14.5229	16.6162	14.5994	18.415	19.8384	17.5616	7.85974	59.567	23
PF3D7_1235600	PF3D7_1235600	P. falciparum 3D7	NA	NA	serine hydroxymethyltransferase	0	N/A	0	1	0	0.0121922	1.63309	4.1655	0.912257	0.0398826	-0.196154	0.264765	0.416288	-2.38675	1.98467	13.1619	13.1559	12.9888	16.7799	18.23	16.7932	15.0771	15.3103	14.8439	13.6759	12.9694	17.9975	NA	NA	NA	16.7799	18.23	16.7932	NA	15.3103	14.8439	NA	NA	17.9975	7.51456	4.3093	3
PF3D7_0831400	PF3D7_0831400	P. falciparum 3D7	NA	NA	Plasmodium exported protein, unknown function	1	HMM: MMRILYTNVFLFIAVLFCILSPGN, NN: MMRILYTNVFLFIAVLFCILSPGNNPL	1	1	0	0.00223074	1.99426	1.89061	0.000946999	2.42159	2.05807	0.273851	0.412675	0.332462	1.97434	18.1396	18.1577	17.709	20.1709	20.0023	19.505	18.4821	18.0949	17.9243	20.5576	20.1025	20.0154	18.1396	18.1577	17.709	20.1709	20.0023	19.505	18.4821	18.0949	17.9243	20.5576	20.1025	20.0154	8.10975	13.649	21
PF3D7_0512600	PF3D7_0512600	P. falciparum 3D7	NA	NA	ras-related protein Rab-1B	0	N/A	1	1	0	0.922888	0.0190566	-0.0952119	0.0655971	1.05818	4.00844	0.0249605	1.11095	3.06952	1.95661	15.2279	13.2016	12.7197	14.0759	12.631	14.1567	12.274	14.725	11.0479	16.7229	16.6907	16.6586	NA	NA	NA	NA	NA	NA	NA	14.725	NA	16.7229	NA	16.6586	6.80177	2.1702	2
PF3D7_0214600	PF3D7_0214600	P. falciparum 3D7	NA	NA	serine/threonine protein kinase, putative	0	N/A	0	1	0	0.185025	0.61805	1.96849	0.192738	0.651092	1.91145	0.734409	0.0962732	-0.520443	1.93997	13.1882	12.3979	13.0624	14.8513	16.5997	13.1029	12.4194	11.5028	13.336	14.0689	16.2028	12.7209	NA	NA	NA	NA	16.5997	13.1029	NA	11.5028	13.336	NA	NA	12.7209	7.02003	3.5542	6
PF3D7_1118300	PF3D7_1118300	P. falciparum 3D7	NA	NA	insulinase, putative	0	N/A	0	1	0	0.0134502	1.60021	1.16742	0.0111703	1.67111	2.70012	0.0520018	0.884863	1.39472	1.93377	13.2788	12.9965	13.3769	14.7188	14.4158	14.0198	13.1268	13.3398	12.7717	16.0395	16.2957	15.0034	13.2788	12.9965	13.3769	14.7188	14.4158	14.0198	13.1268	13.3398	12.7717	16.0395	16.2957	15.0034	7.4304	3.6749	7
PF3D7_1317800	PF3D7_1317800	P. falciparum 3D7	NA	NA	40S ribosomal protein S19	0	N/A	0	1	0	0.0045953	1.83665	1.84436	0.00624745	1.87662	1.91558	0.970901	0.0060525	-0.00459514	1.87997	19.0105	19.4111	18.7627	21.0072	20.9562	20.7541	18.7591	19.4261	18.7717	20.9427	20.7297	21.0313	19.0105	19.4111	18.7627	21.0072	20.9562	20.7541	18.7591	19.4261	18.7717	20.9427	20.7297	21.0313	8.10127	31.671	18
PF3D7_0317300	PF3D7_0317300	P. falciparum 3D7	NA	NA	conserved Plasmodium protein, unknown function	0	N/A	0	1	0	0.951966	0.0109132	0.069855	0.240012	0.561774	3.61474	0.27736	0.412675	3.22751	1.8423	12.8471	14.0087	14.1369	14.4293	11.808	14.965	13.4315	13.3469	13.2623	19.0011	19.2913	12.5925	NA	NA	NA	NA	NA	NA	13.4315	NA	13.2623	19.0011	19.2913	12.5925	8.31252	3.6798	5
PF3D7_0614900	PF3D7_0614900	P. falciparum 3D7	NA	NA	conserved Plasmodium membrane protein, unknown function	11	N/A	0	1	0	0.625679	0.160183	1.0686	0.0161128	1.56316	2.60692	0.618116	0.150938	1.09224	1.83776	13.1522	13.4975	13.8206	18.2898	12.8615	12.5249	12.9695	13.7487	12.4139	15.8414	15.628	15.4835	NA	NA	NA	18.2898	NA	NA	NA	NA	NA	15.8414	15.628	15.4835	7.31524	2.699	1
PF3D7_1464500	PF3D7_1464500	P. falciparum 3D7	NA	NA	conserved Plasmodium membrane protein, unknown function	4	N/A	0	1	0	0.171928	0.643148	1.06075	0.0223074	1.44743	2.47764	0.176783	0.552557	1.01756	1.7692	11.701	13.3217	13.0465	14.4115	13.7448	13.0952	11.7903	11.8211	13.2598	15.5173	14.9201	13.8668	NA	NA	NA	14.4115	13.7448	13.0952	NA	NA	NA	15.5173	14.9201	13.8668	7.42488	6.2872	9
PF3D7_0202000	PF3D7_0202000	P. falciparum 3D7	NA	NA	knob-associated histidine-rich protein	0	HMM: MKSFKNKNTLRRKKAFPVFTKILLVSFLVWVLKCS, NN: MKSFKNKNTLRRKKAFPVFTKILLVSFLVWVLKCS	1	1	0	0.000999645	2.20621	1.17782	0.0924767	0.935763	2.27368	0.991024	0.00391573	0.00473486	1.72575	25.7243	25.9506	25.6105	27.0386	27.0237	26.7566	26.3068	23.7405	23.9648	27.6555	26.7426	26.435	25.7243	25.9506	25.6105	27.0386	27.0237	26.7566	26.3068	23.7405	23.9648	27.6555	26.7426	26.435	10.325	215.57	590
P02549	P02549	Homo sapiens	Spectrin alpha chain, erythrocytic 1	SPTA1	NA	NA	NA	NA	0	1	0.00353743	1.9162	2.10615	0.0817174	0.986228	1.25292	0.78885	0.073596	-0.127562	1.67953	19.6848	20.3381	20.3795	22.0486	22.2147	22.4576	20.6423	20.8828	21.0543	22.7791	21.3706	22.1885	19.6848	20.3381	20.3795	22.0486	22.2147	22.4576	20.6423	20.8828	21.0543	22.7791	21.3706	22.1885	9.78785	323.31	546
PF3D7_1301700	PF3D7_1301700	P. falciparum 3D7	NA	NA	CX3CL1-binding protein 2	3	HMM: MSFCYVRTISIALFLFIFLFLNNGN, NN: MSFCYVRTISIALFLFIFLFLNNGN	1	1	0	0.000798763	2.23438	2.21584	0.0183577	1.51947	1.12009	0.00841148	1.3224	-1.51307	1.66796	19.8897	20.4075	20.0352	22.3886	22.1501	22.4413	19.34	19.6774	20.063	21.1125	20.427	20.9012	19.8897	20.4075	20.0352	22.3886	22.1501	22.4413	19.34	19.6774	20.063	21.1125	20.427	20.9012	8.51751	14.575	26
PF3D7_0220800	PF3D7_0220800	P. falciparum 3D7	NA	NA	cytoadherence linked asexual protein 2	0	HMM: MVSSVKSSLFLLIFFLYLKKNVICS, NN: MVSSVKSSLFLLIFFLYLKKNVICS	0	1	0	0.582937	0.176386	-0.586135	0.0118212	1.65142	3.89277	0.00495447	1.33497	3.88021	1.65332	15.3941	13.6054	12.4126	13.5377	12.4662	13.6499	13.0709	13.0337	13.5114	17.5528	16.0668	17.6748	NA	NA	NA	NA	NA	NA	NA	NA	NA	17.5528	16.0668	17.6748	7.75079	12.955	16
PF3D7_1039000	PF3D7_1039000	P. falciparum 3D7	NA	NA	serine/threonine protein kinase, FIKK family	0	N/A	1	1	0	0.971878	0.00795717	-0.0197988	0.0238969	1.42166	3.29658	0.0734903	0.783522	2.3085	1.63839	14.1183	12.7017	14.1558	13.6986	13.3087	13.9091	13.2186	11.8841	12.8495	17.1934	14.7646	15.8839	NA	NA	NA	NA	NA	NA	NA	NA	NA	17.1934	14.7646	15.8839	7.1329	12.706	2
PF3D7_1337300	PF3D7_1337300	P. falciparum 3D7	NA	NA	exoribonuclease, putative	0	N/A	0	1	0	0.0823761	0.916306	1.77275	0.0446596	1.19666	1.40743	0.00963317	1.3224	-2.2539	1.59009	13.8474	15.6126	13.7286	15.5883	16.4269	16.4916	11.9729	13.064	12.486	14.6308	13.4247	13.6897	NA	NA	NA	15.5883	16.4269	16.4916	NA	NA	NA	NA	NA	NA	7.03028	2.5322	1
PF3D7_0703500	PF3D7_0703500	P. falciparum 3D7	NA	NA	erythrocyte membrane-associated antigen	0	N/A	0	1	0	0.150857	0.693034	1.78636	0.12533	0.813357	1.30861	0.688921	0.116055	-0.417682	1.54748	13.2961	13.1892	13.403	13.5971	16.2831	15.3672	13.6329	12.7704	13.6652	15.0365	13.5813	15.3766	NA	13.1892	13.403	13.5971	16.2831	15.3672	13.6329	12.7704	13.6652	15.0365	13.5813	15.3766	7.56786	16.534	20
PF3D7_1434500	PF3D7_1434500	P. falciparum 3D7	NA	NA	dynein-related AAA-type ATPase, putative	9	N/A	0	1	0	0.1027	0.838668	1.48717	0.0496631	1.16144	1.58059	0.124675	0.637952	-1.03343	1.53388	13.1688	14.8863	13.4945	15.4898	15.3006	15.2207	11.9914	12.8618	13.3159	14.9306	14.4559	13.5243	NA	NA	NA	15.4898	15.3006	15.2207	NA	NA	NA	NA	NA	NA	7.67883	2.0819	2
PF3D7_0929400	PF3D7_0929400	P. falciparum 3D7	NA	NA	high molecular weight rhoptry protein 2	0	HMM: MIKVTIFLLLSIFSFNLYGL, NN: MIKVTIFLLLSIFSFNLYGL	1	1	0	0.00292427	1.95175	1.77702	0.0474127	1.17798	1.25124	0.325973	0.359621	-0.437988	1.51413	21.1598	20.7321	20.5654	22.5501	22.7746	22.4637	20.3983	21.3007	21.0217	22.569	21.4831	22.4223	21.1598	20.7321	20.5654	22.5501	22.7746	22.4637	20.3983	21.3007	21.0217	22.569	21.4831	22.4223	9.63152	158.18	339
PF3D7_0216400	PF3D7_0216400	P. falciparum 3D7	NA	NA	vacuolar protein sorting-associated protein 45, putative	0	N/A	0	1	0	0.711691	0.118362	0.282368	0.00242238	2.20548	2.74281	2.49144e-06	3.37824	8.64673	1.51259	13.5855	11.3987	11.9779	12.2908	12.7859	12.7325	18.9513	18.0217	18.548	21.4841	20.961	21.3043	NA	NA	NA	NA	NA	NA	18.9513	18.0217	18.548	21.4841	20.961	21.3043	8.71451	2.7482	2
