# Supplementary material for: PerTurboID, a targeted in situ method reveals the impact of kinase deletion on its local protein environment in the cytoadhesion complex of malaria-causing parasites
Source: eLife. 2023 Sep 22;12:e86367. doi: 10.7554/eLife.86367 (PMC10564455; doi:10.7554/eLife.86367)
Supplement: Supplementary file 3. [file elife-86367-supp3.xlsx]

## Sheet: KAHRP_PTP4_Raw
Supplementary Table 3: Unfiltered and unprocessed data for KAHRP and PTP4 PerTurboID experiment. iBAQ intensities were Log2-transformed.
Proteins	Organism	Protein Name PF	Gene name PF	Protein Name HS	Gene Names HS	Intensity Kahrp_DMSO1	Intensity Kahrp_DMSO2	Intensity Kahrp_DMSO3	Intensity Kahrp_RAP1	Intensity Kahrp_RAP2	Intensity Kahrp_RAP3	Intensity PTP4_DMSO1	Intensity PTP4_DMSO2	Intensity PTP4_DMSO3	Intensity PTP4_RAP1	Intensity PTP4_RAP2	Intensity PTP4_RAP3	Modifications	Phospho	Biotin (K)	Reverse	Potential contaminant	Intensity	PEP	Score	Delta score	MS/MS Count	Charges	Missed cleavages	Mass	Retention time	Sequence	Protein group IDs	Localization prob_biotK	Score for localization_biotK	Score diff_biotK	Diagnostic peak_biotK	Localization prob_phosSTY	Score for localization_phosSTY	Score diff_phosSTY	Diagnostic peak_pY	Start position	End position	Modified sequence	Biotin (K) Probabilities	Biotin (K) Score Diffs	Phospho (STY) Probabilities	Phospho (STY) Score Diffs	Modified sequence_
P48426;P78356	Homo sapiens			Phosphatidylinositol 5-phosphate 4-kinase type-2 alpha;Phosphatidylinositol 5-phosphate 4-kinase type-2 beta	PIP4K2A;PIP4K2B	22.7761	22.6558	21.9916	22.8344	22.8639	22.3599							2 Biotin (K)	0	2			38456000	6.12e-06	114.62	86.98	20	NaN	3	3272.62	22.845	AAHAAKTVKHGAGAEISTVNPEQYSKR	80	1	91.503	78.891	+	NaN	NaN	NaN		370	396	_AAHAAK(bi)TVK(bi)HGAGAEISTVNPEQYSKR_;_AAHAAK(bi)TVK(bi)HGAGAEISTVNPEQYSKR_;_AAHAAK(bi)TVK(bi)HGAGAEISTVNPEQYSKR_;_AAHAAK(bi)TVK(bi)HGAGAEISTVNPEQYSKR_;_AAHAAK(bi)TVK(bi)HGAGAEISTVNPEQYSKR_;_AAHAAK(bi)TVK(bi)HGAGAEISTVNPEQYSKR_;_AAHAAK(bi)TVK(bi)HGAGAEISTVNPEQYSKR_;_AAHAAK(bi)TVK(bi)HGAGAEISTVNPEQYSKR_;_AAHAAK(bi)TVK(bi)HGAGAEISTVNPEQYSKR_;_AAHAAK(bi)TVK(bi)HGAGAEISTVNPEQYSKR_;_AAHAAK(bi)TVK(bi)H…	AAHAAK(1)TVK(1)HGAGAEISTVNPEQYSKR;AAHAAK(1)TVK(1)HGAGAEISTVNPEQYSKR;AAHAAK(1)TVK(1)HGAGAEISTVNPEQYSKR;AAHAAK(1)TVK(1)HGAGAEISTVNPEQYSKR;AAHAAK(1)TVK(1)HGAGAEISTVNPEQYSKR;AAHAAK(1)TVK(1)HGAGAEISTVNPEQYSKR;AAHAAK(1)TVK(1)HGAGAEISTVNPEQYSKR;AAHAAK(1)TVK(1)HGAGAEISTVNPEQYSKR;AAHAAK(1)TVK(1)HGAGAEISTVNPEQYSKR;AAHAAK(1)TVK(1)HGAGAEISTVNPEQYSKR;AAHAAK(1)TVK(1)HGAGAEISTVNPEQYSKR	AAHAAK(67.75)TVK(64.55)HGAGAEISTVNPEQYSK(-64.55)R;AAHAAK(67.07)TVK(69.11)HGAGAEISTVNPEQYSK(-67.07)R;AAHAAK(81.96)TVK(75.12)HGAGAEISTVNPEQYSK(-75.12)R;AAHAAK(73.22)TVK(73.22)HGAGAEISTVNPEQYSK(-73.22)R;AAHAAK(86.17)TVK(79.26)HGAGAEISTVNPEQYSK(-79.26)R;AAHAAK(94.97)TVK(90.42)HGAGAEISTVNPEQYSK(-90.42)R;AAHAAK(62.82)TVK(63.41)HGAGAEISTVNPEQYSK(-62.82)R;AAHAAK(84.3)TVK(83.17)HGAGAEISTVNPEQYSK(-83.17)R;…			_AAHAAK(bi)TVK(bi)HGAGAEISTVNPEQYSKR_
P37840	Homo sapiens			Alpha-synuclein	SNCA		21.3599		21.6645	21.7484	21.4178							2 Biotin (K)	0	2			12340000	3.22e-05	115.96	91.68	8	3	2	2908.48	37.45	EGVLYVGSKTKEGVVHGVATVAEK	77	1	95.996	66.5489	+	NaN	NaN	NaN		35	58	_EGVLYVGSK(bi)TK(bi)EGVVHGVATVAEK_;_EGVLYVGSK(bi)TK(bi)EGVVHGVATVAEK_;_EGVLYVGSK(bi)TK(bi)EGVVHGVATVAEK_;_EGVLYVGSK(bi)TK(bi)EGVVHGVATVAEK_;_EGVLYVGSK(bi)TK(bi)EGVVHGVATVAEK_;_EGVLYVGSK(bi)TKEGVVHGVATVAEK_;_EGVLYVGSK(bi)TKEGVVHGVATVAEK_	EGVLYVGSK(1)TK(1)EGVVHGVATVAEK;EGVLYVGSK(1)TK(1)EGVVHGVATVAEK;EGVLYVGSK(1)TK(1)EGVVHGVATVAEK;EGVLYVGSK(1)TK(1)EGVVHGVATVAEK;EGVLYVGSK(1)TK(1)EGVVHGVATVAEK;EGVLYVGSK(0.795)TK(0.205)EGVVHGVATVAEK	EGVLYVGSK(52.16)TK(39.77)EGVVHGVATVAEK(-39.77);EGVLYVGSK(62.51)TK(33.16)EGVVHGVATVAEK(-33.16);EGVLYVGSK(66.55)TK(50.63)EGVVHGVATVAEK(-50.63);EGVLYVGSK(45.9)TK(41.47)EGVVHGVATVAEK(-41.47);EGVLYVGSK(45.79)TK(40.45)EGVVHGVATVAEK(-40.45);EGVLYVGSK(5.88)TK(-5.88)EGVVHGVATVAEK(-37.45)			_EGVLYVGSK(bi)TK(bi)EGVVHGVATVAEK_;_EGVLYVGSK(bi)TKEGVVHGVATVAEK_
P11277	Homo sapiens			Spectrin beta chain, erythrocytic	SPTB		20.4218		20.9951									2 Biotin (K)	0	2			3494800	0.00044267	120.92	72.518	2	3	2	2197.13	37.565	FAALEKPTTLELKER	47	1	120.92	120.923	+	NaN	NaN	NaN		2065	2079	_FAALEKPTTLELK(bi)ER_;_FAALEK(bi)PTTLELKER_;_FAALEKPTTLELK(bi)ER_;_FAALEK(bi)PTTLELKER_;_FAALEKPTTLELK(bi)ER_;_FAALEKPTTLELK(bi)ER_;_FAALEKPTTLELK(bi)ER_;_FAALEKPTTLELK(bi)ER_;_FAALEKPTTLELK(bi)ER_;_FAALEKPTTLELK(bi)ER_;_FAALEKPTTLELK(bi)ER_;_FAALEKPTTLELK(bi)ER_;_FAALEKPTTLELK(bi)ER_;_FAALEKPTTLELK(bi)ER_;_FAALEK(bi)PTTLELK(bi)ER_;_FAALEK(bi)PTTLELK(bi)ER_	FAALEKPTTLELK(1)ER;FAALEK(1)PTTLELKER;FAALEKPTTLELK(1)ER;FAALEK(1)PTTLELKER;FAALEKPTTLELK(1)ER;FAALEKPTTLELK(1)ER;FAALEKPTTLELK(1)ER;FAALEKPTTLELK(1)ER;FAALEKPTTLELK(1)ER;FAALEKPTTLELK(1)ER;FAALEKPTTLELK(1)ER;FAALEKPTTLELK(1)ER;FAALEKPTTLELK(1)ER;FAALEKPTTLELK(1)ER;FAALEK(1)PTTLELK(1)ER	FAALEK(-50.88)PTTLELK(50.88)ER;FAALEK(54.69)PTTLELK(-54.69)ER;FAALEK(-104.61)PTTLELK(104.61)ER;FAALEK(74.99)PTTLELK(-74.99)ER;FAALEK(-74.82)PTTLELK(74.82)ER;FAALEK(-93.29)PTTLELK(93.29)ER;FAALEK(-114.85)PTTLELK(114.85)ER;FAALEK(-73.94)PTTLELK(73.94)ER;FAALEK(-80.6)PTTLELK(80.6)ER;FAALEK(-93.01)PTTLELK(93.01)ER;FAALEK(-98.02)PTTLELK(98.02)ER;FAALEK(-91.44)PTTLELK(91.44)ER;FAALEK(-111.93)PTTLELK(11…			_FAALEKPTTLELK(bi)ER_;_FAALEK(bi)PTTLELKER_;_FAALEK(bi)PTTLELK(bi)ER_
Q8NE71	Homo sapiens			ATP-binding cassette sub-family F member 1	ABCF1		19.9094			21.112								2 Biotin (K)	0	2			3251200	0.0025728	119.39	71.613	2	3	2	1802.96	29.685	GKTTLLKHIANR	495	1	119.39	119.386	+	NaN	NaN	NaN		341	352	_GK(bi)TTLLK(bi)HIANR_;_GK(bi)TTLLK(bi)HIANR_	GK(1)TTLLK(1)HIANR	GK(119.39)TTLLK(119.39)HIANR			_GK(bi)TTLLK(bi)HIANR_
P37840	Homo sapiens			Alpha-synuclein	SNCA		22.5087		23.1384	23.7492								2 Biotin (K)	0	2			29263000	8e-15	154.75	111.38	5	3	2	2443.22	33.264	QGVAEAAGKTKEGVLYVGSK	77	NaN	NaN	NaN		NaN	NaN	NaN		24	43	_QGVAEAAGKTK(bi)EGVLYVGSK_;_QGVAEAAGK(bi)TKEGVLYVGSK_;_QGVAEAAGK(bi)TKEGVLYVGSK_;_QGVAEAAGK(bi)TKEGVLYVGSK_;_QGVAEAAGKTK(bi)EGVLYVGSK_;_QGVAEAAGK(bi)TKEGVLYVGSK_;_QGVAEAAGK(bi)TKEGVLYVGSK_;_QGVAEAAGKTK(bi)EGVLYVGSK_;_QGVAEAAGK(bi)TKEGVLYVGSK_;_QGVAEAAGKTK(bi)EGVLYVGSK_;_QGVAEAAGK(bi)TKEGVLYVGSK_;_QGVAEAAGK(bi)TK(bi)EGVLYVGSK_;_QGVAEAAGK(bi)TK(bi)EGVLYVGSK_;_QGVAEAAGK(bi)TK(bi)EGVLYVGSK_;_QGVAEAAG…	QGVAEAAGK(0.358)TK(0.641)EGVLYVGSK(0.002);QGVAEAAGK(0.952)TK(0.048)EGVLYVGSK;QGVAEAAGK(0.966)TK(0.034)EGVLYVGSK;QGVAEAAGK(0.854)TK(0.146)EGVLYVGSK;QGVAEAAGK(0.001)TK(0.999)EGVLYVGSK;QGVAEAAGK(1)TKEGVLYVGSK;QGVAEAAGK(0.996)TK(0.004)EGVLYVGSK;QGVAEAAGK(0.005)TK(0.995)EGVLYVGSK;QGVAEAAGK(0.915)TK(0.079)EGVLYVGSK(0.005);QGVAEAAGK(0.2)TK(0.8)EGVLYVGSK;QGVAEAAGK(1)TK(1)EGVLYVGSK;QGVAEAAGK(1)TK(1)EGVLYV…	QGVAEAAGK(-2.53)TK(2.53)EGVLYVGSK(-25.86);QGVAEAAGK(12.95)TK(-12.95)EGVLYVGSK(-46.37);QGVAEAAGK(14.55)TK(-14.55)EGVLYVGSK(-57.09);QGVAEAAGK(7.67)TK(-7.67)EGVLYVGSK(-81.87);QGVAEAAGK(-30.04)TK(30.04)EGVLYVGSK(-36.46);QGVAEAAGK(35.63)TK(-35.63)EGVLYVGSK(-75.87);QGVAEAAGK(24.46)TK(-24.46)EGVLYVGSK(-111.79);QGVAEAAGK(-23.41)TK(23.41)EGVLYVGSK(-37.08);QGVAEAAGK(10.62)TK(-10.62)EGVLYVGSK(-22.48);QGVAEA…			_QGVAEAAGKTK(bi)EGVLYVGSK_;_QGVAEAAGK(bi)TKEGVLYVGSK_;_QGVAEAAGK(bi)TK(bi)EGVLYVGSK_
P37840	Homo sapiens			Alpha-synuclein	SNCA	23.7182	23.632	22.6012	26.1623	26.2408	23.5754							2 Biotin (K)	0	2			200090000	3.76e-13	151.64	129.82	20	NaN	3	2672.37	30.148	QGVAEAAGKTKEGVLYVGSKTK	77	1	102.16	77.4296	+	NaN	NaN	NaN		24	45	_QGVAEAAGK(bi)TKEGVLYVGSKTK(bi)_;_QGVAEAAGK(bi)TKEGVLYVGSKTK(bi)_;_QGVAEAAGK(bi)TKEGVLYVGSK(bi)TK_;_QGVAEAAGKTK(bi)EGVLYVGSKTK(bi)_;_QGVAEAAGK(bi)TKEGVLYVGSKTK(bi)_;_QGVAEAAGKTK(bi)EGVLYVGSKTK(bi)_;_QGVAEAAGK(bi)TKEGVLYVGSKTK(bi)_;_QGVAEAAGK(bi)TKEGVLYVGSKTK(bi)_;_QGVAEAAGK(bi)TKEGVLYVGSK(bi)TK_;_QGVAEAAGKTK(bi)EGVLYVGSK(bi)TK_;_QGVAEAAGK(bi)TKEGVLYVGSKTK(bi)_;_QGVAEAAGK(bi)TK(bi)EGVLYVGSKTK(bi)_	QGVAEAAGK(0.993)TK(0.007)EGVLYVGSK(0.176)TK(0.824);QGVAEAAGK(0.997)TK(0.003)EGVLYVGSK(0.334)TK(0.666);QGVAEAAGK(0.994)TK(0.006)EGVLYVGSK(0.605)TK(0.395);QGVAEAAGK(0.025)TK(0.975)EGVLYVGSK(0.345)TK(0.655);QGVAEAAGK(0.986)TK(0.014)EGVLYVGSK(0.344)TK(0.656);QGVAEAAGK(0.14)TK(0.86)EGVLYVGSK(0.353)TK(0.647);QGVAEAAGK(0.908)TK(0.093)EGVLYVGSK(0.373)TK(0.626);QGVAEAAGK(0.992)TK(0.008)EGVLYVGSK(0.475)TK(…	QGVAEAAGK(20.9)TK(-20.9)EGVLYVGSK(-6.68)TK(6.68);QGVAEAAGK(25.34)TK(-25.34)EGVLYVGSK(-3)TK(3);QGVAEAAGK(22.38)TK(-22.38)EGVLYVGSK(1.88)TK(-1.88);QGVAEAAGK(-16.02)TK(16.02)EGVLYVGSK(-2.8)TK(2.8);QGVAEAAGK(19.64)TK(-19.64)EGVLYVGSK(-2.84)TK(2.84);QGVAEAAGK(-7.87)TK(7.87)EGVLYVGSK(-2.64)TK(2.64);QGVAEAAGK(9.98)TK(-9.98)EGVLYVGSK(-2.25)TK(2.25);QGVAEAAGK(19.07)TK(-19.07)EGVLYVGSK(-0.48)TK(0.48);QGVAE…			_QGVAEAAGK(bi)TKEGVLYVGSKTK(bi)_;_QGVAEAAGK(bi)TKEGVLYVGSK(bi)TK_;_QGVAEAAGKTK(bi)EGVLYVGSKTK(bi)_;_QGVAEAAGKTK(bi)EGVLYVGSK(bi)TK_;_QGVAEAAGK(bi)TK(bi)EGVLYVGSKTK(bi)_
P37840	Homo sapiens			Alpha-synuclein	SNCA	24.5463	24.3844	23.4551	25.1757	25.0105	24.0935							2 Biotin (K)	0	2			147530000	1.08e-08	176.43	128.15	16	NaN	2	1860.95	30.554	TKEGVLYVGSKTK	77	1	130.66	126.539	+	NaN	NaN	NaN		33	45	_TKEGVLYVGSK(bi)TK_;_TKEGVLYVGSK(bi)TK_;_TKEGVLYVGSK(bi)TK_;_TKEGVLYVGSKTK(bi)_;_TKEGVLYVGSK(bi)TK_;_TKEGVLYVGSK(bi)TK_;_TKEGVLYVGSK(bi)TK_;_TKEGVLYVGSK(bi)TK_;_TKEGVLYVGSK(bi)TK_;_TKEGVLYVGSK(bi)TK_;_TKEGVLYVGSKTK(bi)_;_TKEGVLYVGSK(bi)TK_;_TKEGVLYVGSKTK(bi)_;_TKEGVLYVGSK(bi)TK_;_TKEGVLYVGSKTK(bi)_;_TKEGVLYVGSK(bi)TK_;_TKEGVLYVGSK(bi)TK_;_TKEGVLYVGSK(bi)TK_;_TKEGVLYVGSK(bi)TK_;_TKEGVLYVGSK(bi)TK_…	TKEGVLYVGSK(1)TK;TKEGVLYVGSK(0.711)TK(0.289);TKEGVLYVGSK(0.934)TK(0.066);TKEGVLYVGSK(0.347)TK(0.653);TKEGVLYVGSK(0.96)TK(0.04);TKEGVLYVGSK(0.956)TK(0.044);TKEGVLYVGSK(0.992)TK(0.008);TKEGVLYVGSK(0.921)TK(0.079);TKEGVLYVGSK(0.781)TK(0.219);TKEGVLYVGSK(1)TK;TKEGVLYVGSK(0.34)TK(0.66);TKEGVLYVGSK(0.983)TK(0.017);TKEGVLYVGSK(0.351)TK(0.649);TKEGVLYVGSK(0.966)TK(0.034);TKEGVLYVGSK(0.445)TK(0.555);TKEGV…	TK(-222.76)EGVLYVGSK(45.7)TK(-45.7);TK(-109.25)EGVLYVGSK(3.92)TK(-3.92);TK(-99.23)EGVLYVGSK(11.52)TK(-11.52);TK(-81.53)EGVLYVGSK(-2.75)TK(2.75);TK(-75.06)EGVLYVGSK(13.76)TK(-13.76);TK(-71.92)EGVLYVGSK(13.36)TK(-13.36);TK(-68.29)EGVLYVGSK(20.92)TK(-20.92);TK(-57.65)EGVLYVGSK(10.67)TK(-10.67);TK(-93.67)EGVLYVGSK(5.53)TK(-5.53);TK(-211.14)EGVLYVGSK(50.76)TK(-50.76);TK(-112.59)EGVLYVGSK(-2.88)TK(2.88…			_TKEGVLYVGSK(bi)TK_;_TKEGVLYVGSKTK(bi)_;_TK(bi)EGVLYVGSK(bi)TK_;_TK(bi)EGVLYVGSKTK(bi)_
P37840	Homo sapiens			Alpha-synuclein	SNCA					21.7411								2 Biotin (K)	0	2			3505300	1.92e-07	122.44	83.164	0	4	3	3137.63	34.458	TKEGVLYVGSKTKEGVVHGVATVAEK	77	NaN	NaN	NaN		NaN	NaN	NaN		33	58	_TKEGVLYVGSK(bi)TK(bi)EGVVHGVATVAEK_	TKEGVLYVGSK(1)TK(1)EGVVHGVATVAEK	TK(-52.91)EGVLYVGSK(52.91)TK(47.26)EGVVHGVATVAEK(-47.26)			_TKEGVLYVGSK(bi)TK(bi)EGVVHGVATVAEK_
P37840	Homo sapiens			Alpha-synuclein	SNCA	21.0876	20.9877	20.0618	21.3366	20.897	20.7738							2 Biotin (K)	0	2			11796000	3.88e-05	161.94	63.537	9	NaN	2	1739.87	23.182	TKQGVAEAAGKTK	77	1	109.48	100.912	+	NaN	NaN	NaN		22	34	_TKQGVAEAAGK(bi)TK_;_TKQGVAEAAGK(bi)TK_;_TKQGVAEAAGK(bi)TK_;_TKQGVAEAAGK(bi)TK_;_TKQGVAEAAGK(bi)TK_;_TKQGVAEAAGK(bi)TK_;_TKQGVAEAAGK(bi)TK_;_TKQGVAEAAGK(bi)TK_;_TKQGVAEAAGK(bi)TK_;_TKQGVAEAAGK(bi)TK_;_TKQGVAEAAGK(bi)TK_;_TKQGVAEAAGK(bi)TK_;_TKQGVAEAAGK(bi)TK_;_TKQGVAEAAGK(bi)TK_;_TKQGVAEAAGK(bi)TK_;_TKQGVAEAAGK(bi)TK_;_TKQGVAEAAGK(bi)TK_;_TKQGVAEAAGK(bi)TK_;_TKQGVAEAAGK(bi)TK_;_TKQGVAEAAGK(bi)TK_…	TKQGVAEAAGK(0.958)TK(0.042);TKQGVAEAAGK(0.999)TK(0.001);TKQGVAEAAGK(0.997)TK(0.003);TKQGVAEAAGK(0.992)TK(0.008);TKQGVAEAAGK(0.969)TK(0.031);TKQGVAEAAGK(0.998)TK(0.002);TKQGVAEAAGK(0.993)TK(0.007);TKQGVAEAAGK(1)TK;TKQGVAEAAGK(0.999)TK(0.001);TKQGVAEAAGK(1)TK;TKQGVAEAAGK(0.958)TK(0.042);TKQGVAEAAGK(1)TK;TKQGVAEAAGK(0.764)TK(0.236);TKQGVAEAAGK(1)TK;TKQGVAEAAGK(0.992)TK(0.008);TKQGVAEAAGK(0.999)TK(0.…	TK(-109.44)QGVAEAAGK(13.61)TK(-13.61);TK(-154.2)QGVAEAAGK(32.99)TK(-32.99);TK(-112.41)QGVAEAAGK(25.18)TK(-25.18);TK(-129.55)QGVAEAAGK(20.7)TK(-20.7);TK(-77.01)QGVAEAAGK(14.89)TK(-14.89);TK(-149.49)QGVAEAAGK(26.66)TK(-26.66);TK(-120.61)QGVAEAAGK(21.38)TK(-21.38);TK(-163.26)QGVAEAAGK(54.52)TK(-54.52);TK(-115.94)QGVAEAAGK(29.52)TK(-29.52);TK(-138.43)QGVAEAAGK(42.35)TK(-42.35);TK(-105.11)QGVAEAAGK(13…			_TKQGVAEAAGK(bi)TK_;_TK(bi)QGVAEAAGK(bi)TK_
P37840	Homo sapiens			Alpha-synuclein	SNCA					22.4901								2 Biotin (K)	0	2			5891100	0.0078495	70.704	35.833	1	3	3	2672.37	30.182	TKQGVAEAAGKTKEGVLYVGSK	77	NaN	NaN	NaN		NaN	NaN	NaN		22	43	_TKQGVAEAAGK(bi)TKEGVLYVGSK_;_TKQGVAEAAGK(bi)TKEGVLYVGSK_;_TKQGVAEAAGK(bi)TKEGVLYVGSK_;_TKQGVAEAAGKTK(bi)EGVLYVGSK_;_TKQGVAEAAGK(bi)TKEGVLYVGSK_;_TKQGVAEAAGK(bi)TKEGVLYVGSK_;_TKQGVAEAAGK(bi)TKEGVLYVGSK_;_TKQGVAEAAGK(bi)TKEGVLYVGSK_;_TKQGVAEAAGKTK(bi)EGVLYVGSK_;_TKQGVAEAAGKTK(bi)EGVLYVGSK_;_TKQGVAEAAGK(bi)TKEGVLYVGSK_;_TKQGVAEAAGK(bi)TKEGVLYVGSK_;_TKQGVAEAAGK(bi)TKEGVLYVGSK_;_TKQGVAEAAGK(bi)TKEGVL…	TKQGVAEAAGK(0.972)TK(0.028)EGVLYVGSK;TKQGVAEAAGK(0.891)TK(0.108)EGVLYVGSK(0.001);TKQGVAEAAGK(0.865)TK(0.124)EGVLYVGSK(0.01);TKQGVAEAAGK(0.266)TK(0.734)EGVLYVGSK;TKQGVAEAAGK(0.631)TK(0.368)EGVLYVGSK(0.001);TKQGVAEAAGK(0.974)TK(0.026)EGVLYVGSK;TKQGVAEAAGK(0.995)TK(0.005)EGVLYVGSK;TKQGVAEAAGK(0.932)TK(0.068)EGVLYVGSK(0.001);TKQGVAEAAGK(0.055)TK(0.939)EGVLYVGSK(0.006);TKQGVAEAAGK(0.005)TK(0.995)EGVLY…	TK(-83.98)QGVAEAAGK(15.4)TK(-15.4)EGVLYVGSK(-44.09);TK(-41.88)QGVAEAAGK(9.15)TK(-9.15)EGVLYVGSK(-30.46);TK(-33.47)QGVAEAAGK(8.44)TK(-8.44)EGVLYVGSK(-19.17);TK(-90.35)QGVAEAAGK(-4.4)TK(4.4)EGVLYVGSK(-38.78);TK(-55.85)QGVAEAAGK(2.34)TK(-2.34)EGVLYVGSK(-27.92);TK(-58.58)QGVAEAAGK(15.74)TK(-15.74)EGVLYVGSK(-41.52);TK(-97.31)QGVAEAAGK(22.82)TK(-22.82)EGVLYVGSK(-54.15);TK(-47.14)QGVAEAAGK(11.39)TK(-11.…			_TKQGVAEAAGK(bi)TKEGVLYVGSK_;_TKQGVAEAAGKTK(bi)EGVLYVGSK_;_TKQGVAEAAGK(bi)TK(bi)EGVLYVGSK_
P11171;Q9Y2J2;O43491	Homo sapiens			Protein 4.1;Band 4.1-like protein 3;Band 4.1-like protein 3, N-terminally processed;Band 4.1-like protein 2	EPB41;EPB41L3;EPB41L2	22.7627	22.6244	22.3928	24.5812	24.3031	23.2094							2 Biotin (K)	0	2			74572000	0.018356	76.728	38.283	3	3	3	2025.05	24.698	TVKGGISETRIEKR	46;11	1	66.708	66.7076	+	NaN	NaN	NaN		806	819	_TVKGGISETRIEK(bi)R_;_TVKGGISETRIEK(bi)R_;_TVKGGISETRIEK(bi)R_;_TVKGGISETRIEK(bi)R_;_TVKGGISETRIEK(bi)R_;_TVKGGISETRIEK(bi)R_;_TVKGGISETRIEK(bi)R_;_TVKGGISETRIEK(bi)R_;_TVKGGISETRIEK(bi)R_;_TVKGGISETRIEK(bi)R_;_TVKGGISETRIEK(bi)R_;_TVKGGISETRIEK(bi)R_;_TVK(bi)GGISETRIEK(bi)R_;_TVK(bi)GGISETRIEK(bi)R_;_TVK(bi)GGISETRIEK(bi)R_;_TVK(bi)GGISETRIEK(bi)R_;_TVK(bi)GGISETRIEK(bi)R_;_TVK(bi)GGISETRIEK(bi)…	TVKGGISETRIEK(1)R;TVKGGISETRIEK(1)R;TVKGGISETRIEK(1)R;TVKGGISETRIEK(1)R;TVKGGISETRIEK(1)R;TVKGGISETRIEK(1)R;TVKGGISETRIEK(1)R;TVKGGISETRIEK(1)R;TVKGGISETRIEK(1)R;TVK(1)GGISETRIEK(1)R;TVK(1)GGISETRIEK(1)R;TVK(1)GGISETRIEK(1)R	TVK(-69.99)GGISETRIEK(69.99)R;TVK(-48.27)GGISETRIEK(48.27)R;TVK(-58.94)GGISETRIEK(58.94)R;TVK(-60.92)GGISETRIEK(60.92)R;TVK(-90.54)GGISETRIEK(90.54)R;TVK(-67.02)GGISETRIEK(67.02)R;TVK(-82)GGISETRIEK(82)R;TVK(-60.24)GGISETRIEK(60.24)R;TVK(-66)GGISETRIEK(66)R;TVK(74.48)GGISETRIEK(74.48)R;TVK(76.73)GGISETRIEK(76.73)R;TVK(66.71)GGISETRIEK(66.71)R			_TVKGGISETRIEK(bi)R_;_TVK(bi)GGISETRIEK(bi)R_
Q08495	Homo sapiens			Dematin	DMTN		22.0935	21.5224	22.2285	22.2686	21.9318							2 Biotin (K)	0	2			21454000	1.83e-07	161.94	98.732	9	3	2	2301.12	41.262	VTSNLGKMILKEEMEK	474	1	161.94	106.163	+	NaN	NaN	NaN		244	259	_VTSNLGK(bi)M(ox)ILKEEMEK_;_VTSNLGK(bi)MILKEEM(ox)EK_;_VTSNLGK(bi)M(ox)ILKEEMEK_;_VTSNLGK(bi)M(ox)ILKEEMEK_;_VTSNLGK(bi)M(ox)ILKEEMEK_;_VTSNLGK(bi)M(ox)ILKEEMEK_;_VTSNLGK(bi)M(ox)ILKEEMEK_;_VTSNLGK(bi)M(ox)ILKEEMEK_;_VTSNLGK(bi)M(ox)ILKEEMEK_;_VTSNLGK(bi)MILKEEM(ox)EK_;_VTSNLGK(bi)M(ox)ILKEEMEK_;_VTSNLGK(bi)MILKEEM(ox)EK_;_VTSNLGK(bi)M(ox)ILKEEMEK_;_VTSNLGK(bi)MILKEEM(ox)EK_;_VTSNLGK(bi)MILKEEM(o…	VTSNLGK(0.998)MILK(0.002)EEMEK;VTSNLGK(0.999)MILK(0.001)EEMEK;VTSNLGK(0.981)MILK(0.019)EEMEK;VTSNLGK(0.979)MILK(0.017)EEMEK(0.004);VTSNLGK(1)MILKEEMEK;VTSNLGK(0.995)MILK(0.005)EEMEK;VTSNLGK(0.988)MILK(0.012)EEMEK;VTSNLGK(0.983)MILK(0.017)EEMEK;VTSNLGK(0.999)MILK(0.001)EEMEK;VTSNLGK(0.999)MILK(0.001)EEMEK;VTSNLGK(1)MILKEEMEK;VTSNLGK(0.999)MILK(0.001)EEMEK;VTSNLGK(0.996)MILK(0.004)EEMEK;VTSNLGK(0.9…	VTSNLGK(27.32)MILK(-27.32)EEMEK(-39.35);VTSNLGK(28.81)MILK(-28.81)EEMEK(-55.95);VTSNLGK(17.13)MILK(-17.13)EEMEK(-52.03);VTSNLGK(18)MILK(-18)EEMEK(-24.32);VTSNLGK(34.18)MILK(-34.18)EEMEK(-77.02);VTSNLGK(24.44)MILK(-24.44)EEMEK(-42.38);VTSNLGK(19.31)MILK(-19.31)EEMEK(-54.62);VTSNLGK(18.17)MILK(-18.17)EEMEK(-33.78);VTSNLGK(29.67)MILK(-29.67)EEMEK(-75.42);VTSNLGK(30.16)MILK(-30.16)EEMEK(-51.85);VTSNL…			_VTSNLGK(bi)M(ox)ILKEEMEK_;_VTSNLGK(bi)MILKEEM(ox)EK_;_VTSNLGK(bi)MILKEEMEK_;_VTSNLGK(bi)MILK(bi)EEMEK_;_VTSNLGKM(ox)ILK(bi)EEM(ox)EK_;_VTSNLGK(bi)M(ox)ILKEEM(ox)EK_
PF3D7_1477500	P. falciparum	Plasmodium exported protein (PHISTb), unknown function							22.087	21.5428								2 Biotin (K)	0	2			7510200	1.39e-09	130.17	84.234	5	3	2	3329.6	41.763	ANEFYEKNPDLVTCKNAHFLNLLK	467	1	176.54	80.699	+	NaN	NaN	NaN		337	360	_ANEFYEKNPDLVTCK(bi)NAHFLNLLK_;_ANEFYEKNPDLVTCK(bi)NAHFLNLLK_;_ANEFYEKNPDLVTCK(bi)NAHFLNLLK_;_ANEFYEKNPDLVTCK(bi)NAHFLNLLK_;_ANEFYEKNPDLVTCK(bi)NAHFLNLLK_;_ANEFYEKNPDLVTCK(bi)NAHFLNLLK_;_ANEFYEKNPDLVTCK(bi)NAHFLNLLK_;_ANEFYEKNPDLVTCK(bi)NAHFLNLLK_;_ANEFYEKNPDLVTCK(bi)NAHFLNLLK_;_ANEFYEKNPDLVTCK(bi)NAHFLNLLK_;_ANEFYEKNPDLVTCK(bi)NAHFLNLLK_;_ANEFYEKNPDLVTCK(bi)NAHFLNLLK_;_ANEFYEKNPDLVTCK(bi)NAHFLNL…	ANEFYEKNPDLVTCK(0.999)NAHFLNLLK(0.001);ANEFYEKNPDLVTCK(1)NAHFLNLLK;ANEFYEKNPDLVTCK(1)NAHFLNLLK;ANEFYEKNPDLVTCK(1)NAHFLNLLK;ANEFYEKNPDLVTCK(0.999)NAHFLNLLK(0.001);ANEFYEKNPDLVTCK(1)NAHFLNLLK;ANEFYEKNPDLVTCK(0.99)NAHFLNLLK(0.01);ANEFYEKNPDLVTCK(1)NAHFLNLLK;ANEFYEKNPDLVTCK(1)NAHFLNLLK;ANEFYEKNPDLVTCK(1)NAHFLNLLK;ANEFYEK(0.013)NPDLVTCK(0.986)NAHFLNLLK(0.001);ANEFYEKNPDLVTCK(1)NAHFLNLLK;ANEFYEKNPDLVTC…	ANEFYEK(-88)NPDLVTCK(32.04)NAHFLNLLK(-32.04);ANEFYEK(-122.81)NPDLVTCK(52.67)NAHFLNLLK(-52.67);ANEFYEK(-109.03)NPDLVTCK(42.11)NAHFLNLLK(-42.11);ANEFYEK(-123.56)NPDLVTCK(69.07)NAHFLNLLK(-69.07);ANEFYEK(-93.55)NPDLVTCK(30.4)NAHFLNLLK(-30.4);ANEFYEK(-61.87)NPDLVTCK(34.39)NAHFLNLLK(-34.39);ANEFYEK(-100.04)NPDLVTCK(20.11)NAHFLNLLK(-20.11);ANEFYEK(-123.34)NPDLVTCK(70.39)NAHFLNLLK(-70.39);ANEFYEK(-91.79)…			_ANEFYEKNPDLVTCK(bi)NAHFLNLLK_;_ANEFYEK(bi)NPDLVTCK(bi)NAHFLNLLK_
PF3D7_0730900	P. falciparum	EMP1-trafficking protein													22.0727	22.6496	21.8842	2 Biotin (K)	0	2			14862000	0.016626	81.713	38.997	1	3	2	2197.02	21.729	ASNYMHKNPNKVNTK	222	NaN	NaN	NaN		NaN	NaN	NaN		277	291	_ASNYMHKNPNK(bi)VNTK_;_ASNYMHK(bi)NPNKVNTK_;_ASNYMHK(bi)NPNKVNTK_;_ASNYMHKNPNK(bi)VNTK_;_ASNYMHK(bi)NPNKVNTK_;_ASNYMHKNPNK(bi)VNTK_;_ASNYMHK(bi)NPNKVNTK_;_ASNYMHK(bi)NPNKVNTK_;_ASNYMHKNPNK(bi)VNTK_;_ASNYMHK(bi)NPNKVNTK_;_ASNYMHK(bi)NPNKVNTK_;_ASNYMHKNPNK(bi)VNTK_;_ASNYMHK(bi)NPNKVNTK_;_ASNYMHK(bi)NPNKVNTK_;_ASNYMHKNPNK(bi)VNTK_;_ASNYMHK(bi)NPNKVNTK_;_ASNYMHK(bi)NPNKVNTK_;_ASNYMHKNPNK(bi)VNTK_;_AS…	ASNYMHK(0.09)NPNK(0.909)VNTK(0.001);ASNYMHK(0.957)NPNK(0.042)VNTK(0.001);ASNYMHK(0.999)NPNK(0.001)VNTK;ASNYMHKNPNK(0.989)VNTK(0.011);ASNYMHK(0.996)NPNK(0.003)VNTK;ASNYMHK(0.003)NPNK(0.993)VNTK(0.003);ASNYMHK(0.997)NPNK(0.003)VNTK;ASNYMHK(1)NPNKVNTK;ASNYMHK(0.13)NPNK(0.853)VNTK(0.017);ASNYMHK(0.999)NPNK(0.001)VNTK;ASNYMHK(0.993)NPNK(0.007)VNTK;ASNYMHKNPNK(1)VNTK;ASNYMHK(1)NPNKVNTK;ASNYMHK(0.999)NP…	ASNYMHK(-10.06)NPNK(10.06)VNTK(-28.51);ASNYMHK(13.57)NPNK(-13.57)VNTK(-28.7);ASNYMHK(30.32)NPNK(-30.32)VNTK(-46.38);ASNYMHK(-36.1)NPNK(19.54)VNTK(-19.54);ASNYMHK(24.74)NPNK(-24.74)VNTK(-37.58);ASNYMHK(-24.67)NPNK(24.67)VNTK(-24.67);ASNYMHK(24.69)NPNK(-24.69)VNTK(-48.29);ASNYMHK(48.34)NPNK(-48.34)VNTK(-56.24);ASNYMHK(-8.18)NPNK(8.18)VNTK(-17.06);ASNYMHK(32.06)NPNK(-32.06)VNTK(-43.98);ASNYMHK(21.4)…			_ASNYMHKNPNK(bi)VNTK_;_ASNYMHK(bi)NPNKVNTK_;_ASNYM(ox)HKNPNK(bi)VNTK_;_ASNYM(ox)HK(bi)NPNKVNTK_;_ASNYM(ox)HK(bi)NPNK(bi)VNTK_;_ASNYMHK(bi)NPNK(bi)VNTK_
PF3D7_0730900	P. falciparum	EMP1-trafficking protein										22.1996	22.2856	21.9615	21.5403	21.1965	21.0056	2 Biotin (K)	0	2			21571000	0.00019329	97.081	45.992	7	4	3	2639.28	19.253	ASNYMHKNPNKVNTKTVNK	222	NaN	NaN	NaN		NaN	NaN	NaN		277	295	_ASNYMHKNPNKVNTK(bi)TVNK_;_ASNYMHKNPNKVNTK(bi)TVNK_;_ASNYMHKNPNKVNTK(bi)TVNK_;_ASNYMHKNPNKVNTK(bi)TVNK_;_ASNYMHKNPNKVNTK(bi)TVNK_;_ASNYMHKNPNKVNTK(bi)TVNK_;_ASNYMHKNPNKVNTK(bi)TVNK_;_ASNYMHKNPNKVNTK(bi)TVNK_;_ASNYMHKNPNKVNTK(bi)TVNK_;_ASNYMHKNPNKVNTK(bi)TVNK_;_ASNYMHKNPNKVNTK(bi)TVNK_;_ASNYMHKNPNKVNTK(bi)TVNK_;_ASNYMHKNPNKVNTK(bi)TVNK_;_ASNYMHKNPNKVNTK(bi)TVNK_;_ASNYMHKNPNKVNTK(bi)TVNK_;_ASNYMHKN…	ASNYMHK(0.01)NPNK(0.237)VNTK(0.75)TVNK(0.002);ASNYMHK(0.016)NPNK(0.004)VNTK(0.962)TVNK(0.018);ASNYMHKNPNK(0.005)VNTK(0.984)TVNK(0.011);ASNYMHK(0.046)NPNK(0.056)VNTK(0.897)TVNK(0.002);ASNYMHK(0.001)NPNK(0.01)VNTK(0.982)TVNK(0.007);ASNYMHKNPNKVNTK(1)TVNK;ASNYMHKNPNKVNTK(1)TVNK;ASNYMHKNPNK(0.024)VNTK(0.973)TVNK(0.003);ASNYMHK(0.01)NPNK(0.061)VNTK(0.921)TVNK(0.008);ASNYMHKNPNKVNTK(1)TVNK;ASNYMHK(0.03…	ASNYMHK(-18.74)NPNK(-5)VNTK(5)TVNK(-25.05);ASNYMHK(-17.77)NPNK(-23.62)VNTK(17.39)TVNK(-17.39);ASNYMHK(-35.32)NPNK(-22.83)VNTK(19.49)TVNK(-19.49);ASNYMHK(-12.94)NPNK(-12.05)VNTK(12.05)TVNK(-27.22);ASNYMHK(-30.9)NPNK(-19.86)VNTK(19.86)TVNK(-21.37);ASNYMHK(-135.94)NPNK(-59.02)VNTK(35.97)TVNK(-35.97);ASNYMHK(-79.53)NPNK(-42.5)VNTK(38.83)TVNK(-38.83);ASNYMHK(-57.61)NPNK(-16.1)VNTK(16.1)TVNK(-24.85);AS…			_ASNYMHKNPNKVNTK(bi)TVNK_;_ASNYM(ox)HKNPNKVNTK(bi)TVNK_;_ASNYMHKNPNK(bi)VNTK(bi)TVNK_;_ASNYMHK(bi)NPNKVNTK(bi)TVNK_
PF3D7_0730900	P. falciparum	EMP1-trafficking protein										24.7389	24.867	24.5285	24.5926	24.1174	24.4923	2 Biotin (K)	0	2			149840000	2.13e-20	157.14	124.45	34	NaN	3	3228.54	28.236	ASVSEINENVEETKKDIPQNKNYK	222	0.95924	135.21	13.7418	+	NaN	NaN	NaN		1141	1164	_ASVSEINENVEETKK(bi)DIPQNKNYK_;_ASVSEINENVEETKKDIPQNK(bi)NYK_;_ASVSEINENVEETKKDIPQNK(bi)NYK_;_ASVSEINENVEETKKDIPQNK(bi)NYK_;_ASVSEINENVEETKKDIPQNK(bi)NYK_;_ASVSEINENVEETKKDIPQNK(bi)NYK_;_ASVSEINENVEETKKDIPQNK(bi)NYK_;_ASVSEINENVEETKKDIPQNK(bi)NYK_;_ASVSEINENVEETKKDIPQNK(bi)NYK_;_ASVSEINENVEETKKDIPQNK(bi)NYK_;_ASVSEINENVEETKK(bi)DIPQNKNYK_;_ASVSEINENVEETKKDIPQNK(bi)NYK_;_ASVSEINENVEETKKDIPQNK(bi)N…	ASVSEINENVEETK(0.093)K(0.904)DIPQNK(0.001)NYK(0.002);ASVSEINENVEETKK(0.001)DIPQNK(0.786)NYK(0.213);ASVSEINENVEETKKDIPQNK(0.822)NYK(0.178);ASVSEINENVEETKKDIPQNK(0.659)NYK(0.341);ASVSEINENVEETKKDIPQNK(0.742)NYK(0.258);ASVSEINENVEETKKDIPQNK(0.806)NYK(0.194);ASVSEINENVEETKKDIPQNK(0.794)NYK(0.206);ASVSEINENVEETK(0.001)K(0.027)DIPQNK(0.762)NYK(0.21);ASVSEINENVEETKK(0.001)DIPQNK(0.74)NYK(0.259);ASVSEINE…	ASVSEINENVEETK(-9.88)K(9.88)DIPQNK(-28.03)NYK(-27.38);ASVSEINENVEETK(-36.83)K(-31.76)DIPQNK(5.68)NYK(-5.68);ASVSEINENVEETK(-94.47)K(-78.68)DIPQNK(6.65)NYK(-6.65);ASVSEINENVEETK(-53.58)K(-47.7)DIPQNK(2.85)NYK(-2.85);ASVSEINENVEETK(-44.55)K(-40.18)DIPQNK(4.58)NYK(-4.58);ASVSEINENVEETK(-85.34)K(-70.5)DIPQNK(6.19)NYK(-6.19);ASVSEINENVEETK(-50.72)K(-46.66)DIPQNK(5.85)NYK(-5.85);ASVSEINENVEETK(-27.29)K…			_ASVSEINENVEETKK(bi)DIPQNKNYK_;_ASVSEINENVEETKKDIPQNK(bi)NYK_;_ASVSEINENVEETKKDIPQNKNYK(bi)_;_ASVSEINENVEETKK(bi)DIPQNK(bi)NYK_;_ASVSEINENVEETKK(bi)DIPQNKNYK(bi)_;_ASVSEINENVEETK(bi)KDIPQNK(bi)NYK_;_ASVSEINENVEETK(bi)KDIPQNKNYK(bi)_
PF3D7_0202000	P. falciparum	knob-associated histidine-rich protein				24.141	24.0105	23.6096	24.7945	24.7234	24.217							2 Biotin (K)	0	2			124590000	9.37e-05	145.81	71.882	15	NaN	2	2025.9	23.728	AYEEKYESKHYK	117	1	284.92	99.622	+	NaN	NaN	NaN		153	164	_AYEEKYESK(bi)HYK_;_AYEEKYESK(bi)HYK_;_AYEEKYESK(bi)HYK_;_AYEEKYESK(bi)HYK_;_AYEEKYESK(bi)HYK_;_AYEEKYESK(bi)HYK_;_AYEEKYESK(bi)HYK_;_AYEEKYESK(bi)HYK_;_AYEEKYESK(bi)HYK_;_AYEEKYESK(bi)HYK_;_AYEEKYESK(bi)HYK_;_AYEEKYESK(bi)HYK_;_AYEEKYESKHYK(bi)_;_AYEEKYESK(bi)HYK_;_AYEEKYESK(bi)HYK_;_AYEEKYESK(bi)HYK_;_AYEEKYESK(bi)HYK_;_AYEEKYESK(bi)HYK_;_AYEEKYESK(bi)HYK_;_AYEEKYESK(bi)HYK_;_AYEEKYESK(bi)HYK_;…	AYEEKYESK(0.997)HYK(0.003);AYEEKYESK(0.997)HYK(0.003);AYEEKYESK(1)HYK;AYEEKYESK(0.998)HYK(0.002);AYEEK(0.001)YESK(0.975)HYK(0.025);AYEEK(0.001)YESK(0.995)HYK(0.004);AYEEKYESK(0.992)HYK(0.008);AYEEKYESK(1)HYK;AYEEKYESK(0.738)HYK(0.262);AYEEKYESK(0.876)HYK(0.124);AYEEKYESK(0.992)HYK(0.008);AYEEKYESK(1)HYK;AYEEKYESK(0.24)HYK(0.76);AYEEK(0.001)YESK(0.97)HYK(0.029);AYEEK(0.002)YESK(0.995)HYK(0.003);AY…	AYEEK(-97.23)YESK(25.58)HYK(-25.58);AYEEK(-80.99)YESK(25.3)HYK(-25.3);AYEEK(-54.71)YESK(53.39)HYK(-53.39);AYEEK(-58.62)YESK(26.44)HYK(-26.44);AYEEK(-31.48)YESK(15.97)HYK(-15.97);AYEEK(-31.12)YESK(23.68)HYK(-23.68);AYEEK(-54.07)YESK(20.88)HYK(-20.88);AYEEK(-47.78)YESK(34.7)HYK(-34.7);AYEEK(-66.95)YESK(4.5)HYK(-4.5);AYEEK(-75.52)YESK(8.5)HYK(-8.5);AYEEK(-81.51)YESK(20.85)HYK(-20.85);AYEEK(-58.34)YE…			_AYEEKYESK(bi)HYK_;_AYEEKYESKHYK(bi)_;_AYEEK(bi)YESK(bi)HYK_;_AYEEK(bi)YESKHYK(bi)_
PF3D7_0202000	P. falciparum	knob-associated histidine-rich protein				24.2961	24.0935	23.3239	24.5696	24.5404	24.1488	20.5844	20.9927	20.9827	20.9471		20.6002	2 Biotin (K)	0	2			126180000	6.82e-05	138.31	95.359	14	NaN	3	2267.08	22.781	AYEEKYESKHYKLK	117	1	112.08	83.2718	+	NaN	NaN	NaN		153	166	_AYEEKYESKHYKLK(bi)_;_AYEEKYESKHYKLK(bi)_;_AYEEKYESKHYKLK(bi)_;_AYEEKYESKHYKLK(bi)_;_AYEEKYESKHYK(bi)LK_;_AYEEKYESKHYK(bi)LK_;_AYEEKYESKHYK(bi)LK_;_AYEEKYESKHYKLK(bi)_;_AYEEKYESKHYK(bi)LK_;_AYEEKYESKHYKLK(bi)_;_AYEEKYESKHYKLK(bi)_;_AYEEKYESKHYKLK(bi)_;_AYEEKYESKHYKLK(bi)_;_AYEEKYESKHYK(bi)LK_;_AYEEKYESKHYKLK(bi)_;_AYEEKYESKHYK(bi)LK_;_AYEEKYESKHYKLK(bi)_;_AYEEKYESKHYKLK(bi)_;_AYEEKYESK(bi)HYK(bi)…	AYEEKYESK(0.005)HYK(0.402)LK(0.593);AYEEK(0.001)YESK(0.001)HYK(0.45)LK(0.548);AYEEKYESKHYK(0.145)LK(0.855);AYEEKYESK(0.001)HYK(0.438)LK(0.561);AYEEK(0.002)YESK(0.178)HYK(0.777)LK(0.042);AYEEKYESK(0.026)HYK(0.794)LK(0.18);AYEEKYESK(0.001)HYK(0.83)LK(0.169);AYEEKYESKHYK(0.443)LK(0.556);AYEEKYESKHYK(0.791)LK(0.208);AYEEKYESKHYK(0.41)LK(0.59);AYEEKYESK(0.002)HYK(0.438)LK(0.559);AYEEKYESK(0.002)HYK(0.…	AYEEK(-52.21)YESK(-20.77)HYK(-1.68)LK(1.68);AYEEK(-28.15)YESK(-27.61)HYK(-0.85)LK(0.85);AYEEK(-71.9)YESK(-36.17)HYK(-7.7)LK(7.7);AYEEK(-50.19)YESK(-28.04)HYK(-1.07)LK(1.07);AYEEK(-25.77)YESK(-6.39)HYK(6.39)LK(-12.64);AYEEK(-70.46)YESK(-14.81)HYK(6.44)LK(-6.44);AYEEK(-47.87)YESK(-28.35)HYK(6.91)LK(-6.91);AYEEK(-34.69)YESK(-34.51)HYK(-0.98)LK(0.98);AYEEK(-102.24)YESK(-37.92)HYK(5.79)LK(-5.79);AYEEK…			_AYEEKYESKHYKLK(bi)_;_AYEEKYESKHYK(bi)LK_;_AYEEKYESK(bi)HYK(bi)LK_;_AYEEK(bi)YESK(bi)HYK(bi)LK_
PF3D7_0113700	P. falciparum	heat shock protein 40, type II										24.3511	24.3376	24.2096	23.5165	23.3511		2 Biotin (K)	0	2			84767000	1.24e-07	126.32	97.54	23	NaN	2	3332.55	35.762	AYSFYNKYFSKSSGAGNHNIFTHIK	109	1	125.77	90.0735	+	NaN	NaN	NaN		179	203	_AYSFYNKYFSK(bi)SSGAGNHNIFTHIK_;_AYSFYNKYFSK(bi)SSGAGNHNIFTHIK_;_AYSFYNKYFSK(bi)SSGAGNHNIFTHIK_;_AYSFYNKYFSK(bi)SSGAGNHNIFTHIK_;_AYSFYNKYFSK(bi)SSGAGNHNIFTHIK_;_AYSFYNKYFSK(bi)SSGAGNHNIFTHIK_;_AYSFYNKYFSK(bi)SSGAGNHNIFTHIK_;_AYSFYNKYFSK(bi)SSGAGNHNIFTHIK_;_AYSFYNKYFSK(bi)SSGAGNHNIFTHIK_;_AYSFYNKYFSK(bi)SSGAGNHNIFTHIK_;_AYSFYNKYFSK(bi)SSGAGNHNIFTHIK_;_AYSFYNKYFSK(bi)SSGAGNHNIFTHIK_;_AYSFYNKYFSK(bi…	AYSFYNK(0.002)YFSK(0.998)SSGAGNHNIFTHIK;AYSFYNK(0.001)YFSK(0.999)SSGAGNHNIFTHIK;AYSFYNKYFSK(1)SSGAGNHNIFTHIK;AYSFYNK(0.027)YFSK(0.973)SSGAGNHNIFTHIK;AYSFYNKYFSK(1)SSGAGNHNIFTHIK;AYSFYNK(0.001)YFSK(0.999)SSGAGNHNIFTHIK;AYSFYNKYFSK(1)SSGAGNHNIFTHIK;AYSFYNK(0.015)YFSK(0.985)SSGAGNHNIFTHIK;AYSFYNK(0.001)YFSK(0.999)SSGAGNHNIFTHIK;AYSFYNK(0.017)YFSK(0.983)SSGAGNHNIFTHIK;AYSFYNK(0.006)YFSK(0.994)SSGAGNH…	AYSFYNK(-26.78)YFSK(26.78)SSGAGNHNIFTHIK(-66.91);AYSFYNK(-28.48)YFSK(28.48)SSGAGNHNIFTHIK(-88.46);AYSFYNK(-33.06)YFSK(33.06)SSGAGNHNIFTHIK(-69.84);AYSFYNK(-15.55)YFSK(15.55)SSGAGNHNIFTHIK(-59.5);AYSFYNK(-37.91)YFSK(37.91)SSGAGNHNIFTHIK(-73.91);AYSFYNK(-31.84)YFSK(31.84)SSGAGNHNIFTHIK(-52.25);AYSFYNK(-34.34)YFSK(34.34)SSGAGNHNIFTHIK(-83.06);AYSFYNK(-18.16)YFSK(18.16)SSGAGNHNIFTHIK(-54.25);AYSFYNK(…			_AYSFYNKYFSK(bi)SSGAGNHNIFTHIK_;_AYSFYNK(bi)YFSK(bi)SSGAGNHNIFTHIK_
PF3D7_0730900	P. falciparum	EMP1-trafficking protein										19.3407						2 Biotin (K)	0	2			663950	0.0022831	125.73	74.771	5	3	3	2556.19	21.48	DANSGSELKNTNNKEKEVK	222	0.999413	125.73	35.3063	+	NaN	NaN	NaN		1812	1830	_DANSGSELKNTNNK(bi)EKEVK_;_DANSGSELK(bi)NTNNKEKEVK_;_DANSGSELK(bi)NTNNKEKEVK_;_DANSGSELKNTNNK(bi)EKEVK_;_DANSGSELKNTNNKEK(bi)EVK_;_DANSGSELK(bi)NTNNKEKEVK_;_DANSGSELK(bi)NTNNKEKEVK_;_DANSGSELKNTNNK(bi)EKEVK_;_DANSGSELKNTNNKEK(bi)EVK_;_DANSGSELK(bi)NTNNKEKEVK_;_DANSGSELK(bi)NTNNKEKEVK_;_DANSGSELKNTNNK(bi)EKEVK_;_DANSGSELKNTNNKEK(bi)EVK_;_DANSGSELK(bi)NTNNKEKEVK_;_DANSGSELK(bi)NTNNKEKEVK_;_DANSGSEL…	DANSGSELK(0.378)NTNNK(0.6)EK(0.02)EVK(0.003);DANSGSELK(0.935)NTNNK(0.059)EK(0.006)EVK(0.001);DANSGSELK(0.978)NTNNK(0.02)EK(0.002)EVK(0.001);DANSGSELK(0.01)NTNNK(0.54)EK(0.374)EVK(0.075);DANSGSELKNTNNK(0.241)EK(0.727)EVK(0.031);DANSGSELK(1)NTNNKEKEVK;DANSGSELK(1)NTNNKEKEVK;DANSGSELKNTNNK(0.813)EK(0.184)EVK(0.003);DANSGSELKNTNNK(0.151)EK(0.667)EVK(0.182);DANSGSELK(0.96)NTNNK(0.038)EK(0.002)EVK;DANS…	DANSGSELK(-2.01)NTNNK(2.01)EK(-14.78)EVK(-23.76);DANSGSELK(12.01)NTNNK(-12.01)EK(-21.84)EVK(-32.57);DANSGSELK(16.9)NTNNK(-16.9)EK(-27.84)EVK(-30.18);DANSGSELK(-17.2)NTNNK(1.59)EK(-1.59)EVK(-8.58);DANSGSELK(-55.85)NTNNK(-4.79)EK(4.79)EVK(-13.66);DANSGSELK(48.71)NTNNK(-48.71)EK(-55.58)EVK(-67.25);DANSGSELK(40.2)NTNNK(-40.2)EK(-40.2)EVK(-46.47);DANSGSELK(-36.81)NTNNK(6.45)EK(-6.45)EVK(-24.52);DANSGS…			_DANSGSELKNTNNK(bi)EKEVK_;_DANSGSELK(bi)NTNNKEKEVK_;_DANSGSELKNTNNKEK(bi)EVK_;_DANSGSELKNTNNK(bi)EK(bi)EVK_;_DANSGSELK(bi)NTNNK(bi)EKEVK_
PF3D7_0730900	P. falciparum	EMP1-trafficking protein										26.3861	25.6649	26.9977	26.4923	26.1115	25.8457	2 Biotin (K)	0	2			502110000	8.34e-06	114.03	68.412	16	NaN	3	2893.37	25.489	DIPQNKNYKHLTDEENKVEK	222	1	136.85	92.0174	+	NaN	NaN	NaN		1156	1175	_DIPQNKNYK(bi)HLTDEENKVEK_;_DIPQNKNYK(bi)HLTDEENKVEK_;_DIPQNKNYK(bi)HLTDEENKVEK_;_DIPQNKNYK(bi)HLTDEENKVEK_;_DIPQNKNYK(bi)HLTDEENKVEK_;_DIPQNKNYK(bi)HLTDEENKVEK_;_DIPQNK(bi)NYKHLTDEENKVEK_;_DIPQNKNYK(bi)HLTDEENKVEK_;_DIPQNKNYK(bi)HLTDEENKVEK_;_DIPQNKNYK(bi)HLTDEENKVEK_;_DIPQNK(bi)NYKHLTDEENKVEK_;_DIPQNK(bi)NYKHLTDEENKVEK_;_DIPQNK(bi)NYKHLTDEENKVEK_;_DIPQNKNYK(bi)HLTDEENKVEK_;_DIPQNKNYK(bi)HLTDEEN…	DIPQNK(0.159)NYK(0.84)HLTDEENKVEK;DIPQNK(0.056)NYK(0.944)HLTDEENKVEK;DIPQNK(0.015)NYK(0.985)HLTDEENKVEK;DIPQNK(0.012)NYK(0.988)HLTDEENKVEK;DIPQNK(0.334)NYK(0.666)HLTDEENKVEK;DIPQNK(0.004)NYK(0.996)HLTDEENKVEK;DIPQNK(0.5)NYK(0.5)HLTDEENK(0.001)VEK;DIPQNK(0.188)NYK(0.812)HLTDEENKVEK;DIPQNK(0.002)NYK(0.994)HLTDEENK(0.004)VEK(0.001);DIPQNK(0.051)NYK(0.949)HLTDEENKVEK;DIPQNK(0.5)NYK(0.5)HLTDEENKVEK;DI…	DIPQNK(-7.22)NYK(7.22)HLTDEENK(-49.31)VEK(-51.87);DIPQNK(-12.26)NYK(12.26)HLTDEENK(-50.14)VEK(-68.54);DIPQNK(-18.03)NYK(18.03)HLTDEENK(-54.04)VEK(-64.08);DIPQNK(-18.98)NYK(18.98)HLTDEENK(-53.66)VEK(-67.19);DIPQNK(-3.01)NYK(3.01)HLTDEENK(-39.08)VEK(-41.96);DIPQNK(-24.03)NYK(24.03)HLTDEENK(-38.12)VEK(-48.23);DIPQNK(0)NYK(0)HLTDEENK(-29.28)VEK(-46.01);DIPQNK(-6.35)NYK(6.35)HLTDEENK(-46.79)VEK(-52.82…			_DIPQNKNYK(bi)HLTDEENKVEK_;_DIPQNK(bi)NYKHLTDEENKVEK_;_DIPQNK(bi)NYK(bi)HLTDEENKVEK_
PF3D7_0500800	P. falciparum	mature parasite-infected erythrocyte surface antigen								22.6217	23.2081							2 Biotin (K)	0	2			16144000	9.44e-09	147.84	106.14	1	3	3	2567.3	42.555	DKMIGKEVIIEEVKEEVK	159	1	147.84	120.615	+	NaN	NaN	NaN		1118	1135	_DK(bi)M(ox)IGKEVIIEEVKEEVK_;_DKMIGK(bi)EVIIEEVKEEVK_;_DKMIGK(bi)EVIIEEVKEEVK_;_DKMIGK(bi)EVIIEEVKEEVK_;_DKMIGK(bi)EVIIEEVKEEVK_;_DKMIGK(bi)EVIIEEVKEEVK_;_DKMIGK(bi)EVIIEEVKEEVK_;_DKMIGK(bi)EVIIEEVKEEVK_;_DK(bi)MIGKEVIIEEVKEEVK_;_DK(bi)M(ox)IGK(bi)EVIIEEVKEEVK_;_DK(bi)M(ox)IGK(bi)EVIIEEVKEEVK_;_DK(bi)M(ox)IGK(bi)EVIIEEVKEEVK_;_DK(bi)MIGK(bi)EVIIEEVKEEVK_;_DK(bi)MIGK(bi)EVIIEEVKEEVK_	DK(0.914)MIGK(0.086)EVIIEEVKEEVK;DK(0.001)MIGK(0.999)EVIIEEVKEEVK;DK(0.086)MIGK(0.914)EVIIEEVKEEVK;DK(0.056)MIGK(0.944)EVIIEEVKEEVK;DKMIGK(1)EVIIEEVKEEVK;DK(0.091)MIGK(0.909)EVIIEEVKEEVK;DK(0.109)MIGK(0.891)EVIIEEVKEEVK;DKMIGK(1)EVIIEEVKEEVK;DK(0.993)MIGK(0.007)EVIIEEVKEEVK;DK(1)MIGK(1)EVIIEEVKEEVK;DK(1)MIGK(1)EVIIEEVKEEVK;DK(1)MIGK(1)EVIIEEVKEEVK;DK(1)MIGK(1)EVIIEEVKEEVK	DK(10.28)MIGK(-10.28)EVIIEEVK(-84.99)EEVK(-94.68);DK(-30.44)MIGK(30.44)EVIIEEVK(-133.6)EEVK(-152.66);DK(-10.28)MIGK(10.28)EVIIEEVK(-74.54)EEVK(-73.82);DK(-12.25)MIGK(12.25)EVIIEEVK(-119.53)EEVK(-129.9);DK(-33.21)MIGK(33.21)EVIIEEVK(-109.6)EEVK(-110.4);DK(-10)MIGK(10)EVIIEEVK(-86.34)EEVK(-89.55);DK(-9.13)MIGK(9.13)EVIIEEVK(-113.75)EEVK(-129.47);DK(-45.81)MIGK(45.81)EVIIEEVK(-120.41)EEVK(-127.51);D…			_DK(bi)M(ox)IGKEVIIEEVKEEVK_;_DKMIGK(bi)EVIIEEVKEEVK_;_DK(bi)MIGKEVIIEEVKEEVK_;_DK(bi)M(ox)IGK(bi)EVIIEEVKEEVK_;_DK(bi)MIGK(bi)EVIIEEVKEEVK_
PF3D7_0202000	P. falciparum	knob-associated histidine-rich protein				25.1095	25.3307	24.48	24.9043	24.8904	24.9628							2 Biotin (K)	0	2			196990000	1.24e-37	222.24	135.11	33	3	3	2545.19	17.99	DKTQGGKTDKTGASTNAATNK	117	1	168.68	148.985	+	NaN	NaN	NaN		511	531	_DK(bi)TQGGKTDKTGASTNAATNK_;_DK(bi)TQGGKTDKTGASTNAATNK_;_DKTQGGK(bi)TDKTGASTNAATNK_;_DKTQGGK(bi)TDKTGASTNAATNK_;_DKTQGGK(bi)TDKTGASTNAATNK_;_DKTQGGKTDK(bi)TGASTNAATNK_;_DKTQGGKTDK(bi)TGASTNAATNK_;_DK(bi)TQGGKTDKTGASTNAATNK_;_DK(bi)TQGGKTDKTGASTNAATNK_;_DKTQGGK(bi)TDKTGASTNAATNK_;_DKTQGGK(bi)TDKTGASTNAATNK_;_DKTQGGK(bi)TDKTGASTNAATNK_;_DKTQGGKTDK(bi)TGASTNAATNK_;_DK(bi)TQGGKTDKTGASTNAATNK_;_DKTQGG…	DK(0.996)TQGGK(0.004)TDKTGASTNAATNK;DK(1)TQGGKTDKTGASTNAATNK;DK(0.054)TQGGK(0.946)TDKTGASTNAATNK;DKTQGGK(0.995)TDK(0.004)TGASTNAATNK;DK(0.212)TQGGK(0.782)TDK(0.006)TGASTNAATNK;DKTQGGK(0.001)TDK(0.999)TGASTNAATNK;DKTQGGK(0.036)TDK(0.964)TGASTNAATNK;DK(0.926)TQGGK(0.057)TDK(0.017)TGASTNAATNK;DK(1)TQGGKTDKTGASTNAATNK;DKTQGGK(0.999)TDK(0.001)TGASTNAATNK;DK(0.095)TQGGK(0.886)TDK(0.018)TGASTNAATNK;DK(0…	DK(23.79)TQGGK(-23.79)TDK(-45.18)TGASTNAATNK(-89.06);DK(38.12)TQGGK(-38.12)TDK(-64.08)TGASTNAATNK(-118.65);DK(-12.44)TQGGK(12.44)TDK(-36.87)TGASTNAATNK(-91.79);DK(-35.1)TQGGK(23.67)TDK(-23.67)TGASTNAATNK(-92.92);DK(-5.67)TQGGK(5.67)TDK(-21.3)TGASTNAATNK(-118.16);DK(-71.45)TQGGK(-29.23)TDK(29.23)TGASTNAATNK(-74.79);DK(-42.54)TQGGK(-14.24)TDK(14.24)TGASTNAATNK(-56.18);DK(12.15)TQGGK(-12.15)TDK(-17.…			_DK(bi)TQGGKTDKTGASTNAATNK_;_DKTQGGK(bi)TDKTGASTNAATNK_;_DKTQGGKTDK(bi)TGASTNAATNK_;_DK(bi)TQGGKTDK(bi)TGASTNAATNK_;_DKTQGGK(bi)TDK(bi)TGASTNAATNK_;_DK(bi)TQGGK(bi)TDK(bi)TGASTNAATNK_
PF3D7_0202000	P. falciparum	knob-associated histidine-rich protein				23.5638	23.7594	23.0795	24.6595	24.3443	23.654							2 Biotin (K)	0	2			96391000	3.83e-16	178.57	115.86	15	3	3	2497.14	29.844	EARPGGGFKAYEEKYESK	117	NaN	NaN	NaN		NaN	NaN	NaN		144	161	_EARPGGGFK(bi)AYEEKYESK_;_EARPGGGFK(bi)AYEEKYESK_;_EARPGGGFKAYEEK(bi)YESK_;_EARPGGGFK(bi)AYEEKYESK_;_EARPGGGFKAYEEK(bi)YESK_;_EARPGGGFK(bi)AYEEKYESK_;_EARPGGGFK(bi)AYEEKYESK_;_EARPGGGFK(bi)AYEEKYESK_;_EARPGGGFKAYEEK(bi)YESK_;_EARPGGGFKAYEEK(bi)YESK_;_EARPGGGFK(bi)AYEEKYESK_;_EARPGGGFK(bi)AYEEKYESK_;_EARPGGGFK(bi)AYEEKYESK_;_EARPGGGFKAYEEK(bi)YESK_;_EARPGGGFKAYEEK(bi)YESK_;_EARPGGGFKAYEEK(bi)YESK_…	EARPGGGFK(1)AYEEKYESK;EARPGGGFK(1)AYEEKYESK;EARPGGGFKAYEEK(0.999)YESK(0.001);EARPGGGFK(1)AYEEKYESK;EARPGGGFKAYEEK(0.999)YESK(0.001);EARPGGGFK(1)AYEEKYESK;EARPGGGFK(1)AYEEKYESK;EARPGGGFK(1)AYEEKYESK;EARPGGGFKAYEEK(1)YESK;EARPGGGFKAYEEK(0.995)YESK(0.005);EARPGGGFK(1)AYEEKYESK;EARPGGGFK(1)AYEEKYESK;EARPGGGFK(1)AYEEKYESK;EARPGGGFKAYEEK(0.999)YESK(0.001);EARPGGGFKAYEEK(1)YESK;EARPGGGFKAYEEK(0.999)YESK…	EARPGGGFK(80.24)AYEEK(-80.24)YESK(-89.83);EARPGGGFK(127.49)AYEEK(-127.49)YESK(-156.28);EARPGGGFK(-100.7)AYEEK(30.66)YESK(-30.66);EARPGGGFK(39.52)AYEEK(-39.52)YESK(-44.57);EARPGGGFK(-92.26)AYEEK(28.55)YESK(-28.55);EARPGGGFK(85.07)AYEEK(-85.07)YESK(-150.32);EARPGGGFK(101.37)AYEEK(-101.37)YESK(-112.66);EARPGGGFK(108.77)AYEEK(-108.77)YESK(-136.58);EARPGGGFK(-120.77)AYEEK(34.68)YESK(-34.68);EARPGGGFK(…			_EARPGGGFK(bi)AYEEKYESK_;_EARPGGGFKAYEEK(bi)YESK_;_EARPGGGFK(bi)AYEEK(bi)YESK_
PF3D7_0202000	P. falciparum	knob-associated histidine-rich protein				21.2035					21.0292							2 Biotin (K)	0	2			4554900	2.46e-06	142.57	34.507	2	3	2	2105.96	21.742	EASTSKEATKEASTSK	117	1	112.12	78.2485	+	0.744617	126.01	10.0997		546	561	_EASTSKEATK(bi)EASTSK_;_EASTSKEATK(bi)EASTSK_;_EASTSK(bi)EATKEASTSK_;_EASTSKEATK(bi)EASTSK_;_EASTSKEATK(bi)EASTSK_;_EASTSK(bi)EATKEASTSK_;_EASTSK(bi)EATKEASTSK_;_EASTSKEATK(bi)EASTSK_;_EASTSKEATK(bi)EASTSK_;_EASTSK(bi)EATKEASTSK_;_EASTSKEATK(bi)EASTSK_;_EASTSKEATK(bi)EASTSK_;_EASTSK(bi)EATKEASTSK_;_EASTSK(bi)EATKEASTSK_;_EASTSKEATK(bi)EASTSK_;_EASTSKEATK(bi)EASTSK_;_EASTSK(bi)EATKEASTSK_;_EASTSKE…	EASTSKEATK(1)EASTSK;EASTSKEATK(1)EASTSK;EASTSK(1)EATKEASTSK;EASTSKEATK(1)EASTSK;EASTSKEATK(1)EASTSK;EASTSK(1)EATKEASTSK;EASTSK(1)EATKEASTSK;EASTSKEATK(1)EASTSK;EASTSKEATK(0.999)EASTSK(0.001);EASTSK(1)EATKEASTSK;EASTSKEATK(1)EASTSK;EASTSKEATK(1)EASTSK;EASTSK(1)EATKEASTSK;EASTSK(0.999)EATK(0.001)EASTSK;EASTSKEATK(1)EASTSK;EASTSK(0.002)EATK(0.998)EASTSK;EASTSK(1)EATKEASTSK;EASTSKEATK(1)EASTSK;EASTSK…	EASTSK(-81.68)EATK(67.25)EASTSK(-67.25);EASTSK(-60.19)EATK(60.19)EASTSK(-118.97);EASTSK(62.94)EATK(-62.94)EASTSK(-99.55);EASTSK(-65.28)EATK(46.52)EASTSK(-46.52);EASTSK(-51.22)EATK(51.22)EASTSK(-107.57);EASTSK(59.62)EATK(-59.62)EASTSK(-70.77);EASTSK(42.15)EATK(-42.15)EASTSK(-98.37);EASTSK(-44.66)EATK(44.66)EASTSK(-50.01);EASTSK(-33.28)EATK(29.86)EASTSK(-29.86);EASTSK(71.72)EATK(-71.72)EASTSK(-91.3…	EAS(0.499)T(0.499)S(0.002)KEATKEASTSK;EAS(0.99)T(0.009)S(0.001)KEATKEASTSK;EAS(0.844)T(0.134)S(0.022)KEATKEASTSK;EAS(0.615)T(0.344)S(0.041)KEATKEASTSK;EAS(0.815)T(0.154)S(0.031)KEATKEASTSK;EAS(0.547)T(0.398)S(0.055)KEATKEASTSK;EAS(0.972)T(0.023)S(0.004)KEATKEASTSK;EAS(0.822)T(0.149)S(0.029)KEATKEASTSK;EAS(0.981)T(0.018)SKEATKEASTSK;EAS(0.868)T(0.114)S(0.017)KEATKEASTSK;EAS(0.863)T(0.119)S(0.017)K…	EAS(0)T(0)S(-24.94)KEAT(-72.45)KEAS(-113.03)T(-117.62)S(-122.55)K;EAS(20.2)T(-20.2)S(-32.91)KEAT(-70.87)KEAS(-88.76)T(-92.33)S(-94.83)K;EAS(8.01)T(-8.01)S(-15.75)KEAT(-72.67)KEAS(-84.16)T(-86.76)S(-89.74)K;EAS(2.52)T(-2.52)S(-11.8)KEAT(-54.86)KEAS(-76.57)T(-80.9)S(-90.05)K;EAS(7.23)T(-7.23)S(-14.17)KEAT(-40.49)KEAS(-49.32)T(-49.9)S(-48.78)K;EAS(1.39)T(-1.39)S(-9.96)KEAT(-45.4)KEAS(-85.75)T(-89.15…	_EASTSKEATK(bi)EASTSK_;_EASTSK(bi)EATKEASTSK_;_EAS(ph)TSKEATK(bi)EASTSK_;_EAS(ph)TSK(bi)EATKEASTSK_;_EASTSK(bi)EATK(bi)EASTSK_
PF3D7_0202000	P. falciparum	knob-associated histidine-rich protein					20.4749	20.1174	20.7141	20.3887	20.3256							2 Biotin (K)	0	2			7001900	9.58e-16	161.1	114.17	9	3	3	2463.16	18.057	EASTSKEATKEASTSKGATK	117	NaN	NaN	NaN		NaN	NaN	NaN		566	585	_EASTSKEATKEASTSKGATK(bi)_;_EASTSKEATKEASTSK(bi)GATK_;_EASTSKEATKEASTSKGATK(bi)_;_EASTSKEATKEASTSK(bi)GATK_;_EASTSKEATKEASTSK(bi)GATK_;_EASTSKEATKEASTSK(bi)GATK_;_EASTSKEATKEASTSK(bi)GATK_;_EASTSKEATKEASTSK(bi)GATK_;_EASTSKEATKEASTSK(bi)GATK_;_EASTSKEATKEASTSK(bi)GATK_;_EASTSKEATKEASTSK(bi)GATK_;_EASTSKEATKEASTSK(bi)GATK_;_EASTSKEATKEASTSK(bi)GATK_;_EASTSKEATKEASTSK(bi)GATK_;_EASTSKEATKEASTSK(bi)…	EASTSKEATKEASTSK(0.201)GATK(0.799);EASTSKEATK(0.001)EASTSK(0.741)GATK(0.258);EASTSKEATKEASTSK(0.214)GATK(0.786);EASTSKEATKEASTSK(0.99)GATK(0.01);EASTSKEATKEASTSK(0.987)GATK(0.013);EASTSKEATKEASTSK(0.972)GATK(0.028);EASTSK(0.998)EATK(0.002)EASTSKGATK;EASTSK(0.001)EATKEASTSK(0.959)GATK(0.04);EASTSKEATKEASTSK(0.869)GATK(0.13);EASTSKEATK(0.003)EASTSK(0.873)GATK(0.124);EASTSK(0.002)EATK(0.998)EASTSK(0…	EASTSK(-54.89)EATK(-41.35)EASTSK(-5.99)GATK(5.99);EASTSK(-34.31)EATK(-29.43)EASTSK(4.59)GATK(-4.59);EASTSK(-69.85)EATK(-43.82)EASTSK(-5.65)GATK(5.65);EASTSK(-64.47)EATK(-60.33)EASTSK(19.77)GATK(-19.77);EASTSK(-90.45)EATK(-56.42)EASTSK(18.8)GATK(-18.8);EASTSK(-51.4)EATK(-43.92)EASTSK(15.36)GATK(-15.36);EASTSK(29.52)EATK(-29.52)EASTSK(-45.51)GATK(-38.97);EASTSK(-35.1)EATK(-42.17)EASTSK(13.89)GATK(-…	EASTSKEAT(0.029)KEAS(0.111)T(0.409)S(0.409)KGAT(0.04)K;EASTSKEATKEAS(0.903)T(0.071)S(0.025)KGAT(0.001)K;EASTSKEATKEAS(0.682)T(0.202)S(0.075)KGAT(0.041)K;EASTSKEAT(0.001)KEAS(0.322)T(0.481)S(0.168)KGAT(0.028)K;EAS(0.398)T(0.086)S(0.491)KEAT(0.025)KEASTSKGATK	EAS(-33.64)T(-32.27)S(-31.75)KEAT(-11.54)KEAS(-5.66)T(0)S(0)KGAT(-10.12)K;EAS(-63.54)T(-52.81)S(-53.44)KEAT(-37.22)KEAS(11.1)T(-11.1)S(-15.63)KGAT(-33.25)K;EAS(-70.1)T(-73.28)S(-72.18)KEAT(-66.08)KEAS(5.38)T(-5.38)S(-9.67)KGAT(-13.92)K;EAS(-37.14)T(-31.98)S(-40.91)KEAT(-26.68)KEAS(-1.76)T(1.76)S(-4.56)KGAT(-13.51)K;EAS(-0.92)T(-7.57)S(0.92)KEAT(-13.04)KEAS(-53.66)T(-61.78)S(-65.58)KGAT(-69.17)K	_EASTSKEATKEASTSKGATK(bi)_;_EASTSKEATKEASTSK(bi)GATK_;_EASTSK(bi)EATKEAST(ph)SKGATK_;_EASTSKEATKEAS(ph)TSK(bi)GATK_;_EASTSKEATKEAST(ph)SK(bi)GATK_;_EASTSKEATK(bi)EASTSK(bi)GATK_;_EASTSKEATK(bi)EASTSKGATK(bi)_;_EASTS(ph)KEATK(bi)EASTSK(bi)GATK_
PF3D7_0202000	P. falciparum	knob-associated histidine-rich protein				20.7083	20.9856	20.8448		20.1481	20.7137							2 Biotin (K)	0	2			8554600	0.0035541	88.09	36.595	3	3	2	2406.1	21.319	EASTSKGATKEASTTEGATK	117	1	83.251	75.7877	+	NaN	NaN	NaN		576	595	_EAS(ph)TSK(bi)GATKEASTTEGATK_;_EAS(ph)TSKGATK(bi)EASTTEGATK_;_EAS(ph)TSKGATK(bi)EASTTEGATK_;_EAS(ph)TSKGATK(bi)EASTTEGATK_;_EAS(ph)TSKGATK(bi)EASTTEGATK_;_EAS(ph)TSKGATK(bi)EASTTEGATK_;_EAS(ph)TSKGATK(bi)EASTTEGATK_;_EAS(ph)TSKGATK(bi)EASTTEGATK_;_EAS(ph)TSKGATK(bi)EASTTEGATK_;_EAS(ph)TSKGATK(bi)EASTTEGATK_;_EAS(ph)TSKGATK(bi)EASTTEGATK_;_EAS(ph)TSKGATK(bi)EASTTEGATK_;_EASTSK(bi)GATK(bi)EASTTEGA…	EASTSK(0.873)GATK(0.127)EASTTEGATK;EASTSKGATK(0.998)EASTTEGATK(0.002);EASTSK(0.004)GATK(0.996)EASTTEGATK;EASTSK(0.001)GATK(0.999)EASTTEGATK;EASTSKGATK(0.999)EASTTEGATK;EASTSK(0.149)GATK(0.851)EASTTEGATK;EASTSK(1)GATK(1)EASTTEGATK;EASTSK(1)GATK(1)EASTTEGATK	EASTSK(8.48)GATK(-8.48)EASTTEGATK(-51.01);EASTSK(-38.92)GATK(28.17)EASTTEGATK(-28.17);EASTSK(-27.05)GATK(27.05)EASTTEGATK(-36.84);EASTSK(-32.46)GATK(32.46)EASTTEGATK(-57.91);EASTSK(-30.73)GATK(30.73)EASTTEGATK(-39.76);EASTSK(-8.95)GATK(8.95)EASTTEGATK(-50.06);EASTSK(80.61)GATK(57.02)EASTTEGATK(-57.02);EASTSK(75.79)GATK(54.44)EASTTEGATK(-54.44)	EAS(0.451)T(0.451)S(0.097)KGAT(0.001)KEASTTEGATK;EAS(0.632)T(0.279)S(0.088)KGAT(0.001)KEASTTEGATK;EAS(0.558)T(0.234)S(0.201)KGAT(0.007)KEASTTEGATK;EAS(0.904)T(0.056)S(0.04)KGATKEASTTEGATK;EAS(0.333)T(0.333)S(0.333)KGAT(0.002)KEASTTEGATK;EAS(0.618)T(0.289)S(0.087)KGAT(0.007)KEASTTEGATK	EAS(0)T(0)S(-6.79)KGAT(-28.71)KEAS(-45.52)T(-44.54)T(-44.54)EGAT(-62.88)K;EAS(3.56)T(-3.56)S(-8.57)KGAT(-26.72)KEAS(-53.22)T(-56.49)T(-47.8)EGAT(-43.05)K;EAS(3.8)T(-3.8)S(-4.44)KGAT(-19.99)KEAS(-47.26)T(-50.4)T(-46.39)EGAT(-37.6)K;EAS(12.09)T(-12.09)S(-13.58)KGAT(-38.54)KEAS(-54.49)T(-59.02)T(-62.5)EGAT(-74.27)K;EAS(0)T(0)S(0)KGAT(-22.62)KEAS(-45.81)T(-49.78)T(-53.58)EGAT(-53.38)K;EAS(4.09)T(-4.0…	_EAS(ph)TSK(bi)GATKEASTTEGATK_;_EAS(ph)TSKGATK(bi)EASTTEGATK_;_EASTSK(bi)GATK(bi)EASTTEGATK_
PF3D7_0202000	P. falciparum	knob-associated histidine-rich protein				20.3135	20.1006			20.8866	21.7778							2 Biotin (K)	0	2			7961500	1.21e-22	186.74	72.183	11	3	3	2535.18	19.095	EATKEASTSKEATKEASTSK	117	1	167.95	81.2014	+	0.709805	131.93	6.10377		552	571	_EATKEASTSKEATK(bi)EASTSK_;_EATKEASTSKEATK(bi)EASTSK_;_EATKEASTSK(bi)EATKEASTSK_;_EATK(bi)EASTSKEATKEASTSK_;_EATKEASTSKEATK(bi)EASTSK_;_EATKEASTSKEATK(bi)EASTSK_;_EATKEASTSK(bi)EATKEASTSK_;_EATK(bi)EASTSKEATKEASTSK_;_EATKEASTSKEATK(bi)EASTSK_;_EATKEASTSKEATK(bi)EASTSK_;_EATKEASTSKEATK(bi)EASTSK_;_EATKEASTSK(bi)EATKEASTSK_;_EATK(bi)EASTSKEATKEASTSK_;_EATK(bi)EASTSKEATKEASTSK_;_EATKEASTSKEATK(bi)EA…	EATKEASTSK(0.001)EATK(0.998)EASTSK;EATKEASTSKEATK(1)EASTSK;EATKEASTSK(0.999)EATK(0.001)EASTSK;EATK(1)EASTSKEATKEASTSK;EATKEASTSKEATK(1)EASTSK;EATKEASTSK(0.002)EATK(0.998)EASTSK;EATKEASTSK(1)EATKEASTSK;EATK(0.999)EASTSK(0.001)EATKEASTSK;EATKEASTSK(0.002)EATK(0.997)EASTSK(0.001);EATKEASTSKEATK(1)EASTSK;EATKEASTSKEATK(1)EASTSK;EATKEASTSK(1)EATKEASTSK;EATK(1)EASTSKEATKEASTSK;EATK(1)EASTSKEATKEASTSK;E…	EATK(-40.7)EASTSK(-28.72)EATK(28.72)EASTSK(-38.09);EATK(-69.54)EASTSK(-39.83)EATK(39.28)EASTSK(-39.28);EATK(-45.01)EASTSK(28.69)EATK(-28.69)EASTSK(-55.43);EATK(37.99)EASTSK(-37.99)EATK(-58.38)EASTSK(-65.82);EATK(-87.8)EASTSK(-65.03)EATK(45.39)EASTSK(-45.39);EATK(-47.75)EASTSK(-27.06)EATK(27.06)EASTSK(-40.85);EATK(-87.54)EASTSK(85.75)EATK(-85.75)EASTSK(-117.56);EATK(30.95)EASTSK(-30.95)EATK(-44.02…	EAT(0.002)KEAS(0.722)T(0.235)S(0.041)KEATKEASTSK;EAT(0.025)KEAS(0.863)T(0.103)S(0.009)KEATKEASTSK;EAT(0.003)KEAS(0.766)T(0.221)S(0.01)KEATKEASTSK;EATKEAS(0.393)T(0.498)S(0.109)KEATKEASTSK;EAT(0.006)KEAS(0.711)T(0.216)S(0.066)KEATKEASTSK;EAT(0.274)KEAS(0.653)T(0.069)S(0.005)KEATKEASTSK;EAT(0.085)KEAS(0.226)T(0.344)S(0.344)KEATKEASTSK;EAT(0.005)KEAS(0.921)T(0.07)S(0.004)KEATKEASTSK;EAT(0.311)KEAS(0…	EAT(-25.59)KEAS(4.88)T(-4.88)S(-12.45)KEAT(-50.65)KEAS(-81.87)T(-86.39)S(-96.6)K;EAT(-15.36)KEAS(9.25)T(-9.25)S(-20.07)KEAT(-51.5)KEAS(-76.81)T(-78.95)S(-78.95)K;EAT(-23.42)KEAS(5.41)T(-5.41)S(-18.92)KEAT(-57.12)KEAS(-73.71)T(-78.42)S(-95.32)K;EAT(-31.46)KEAS(-1.04)T(1.04)S(-6.63)KEAT(-61.78)KEAS(-87.96)T(-92.15)S(-101.92)K;EAT(-20.43)KEAS(5.18)T(-5.18)S(-10.31)KEAT(-38.95)KEAS(-60.16)T(-64.36)S(…	_EATKEASTSKEATK(bi)EASTSK_;_EATKEASTSK(bi)EATKEASTSK_;_EATK(bi)EASTSKEATKEASTSK_;_EATKEAS(ph)TSKEATK(bi)EASTSK_;_EATKEAS(ph)TSK(bi)EATKEASTSK_;_EATKEAST(ph)SK(bi)EATKEASTSK_;_EATK(bi)EASTSK(bi)EATKEASTSK_;_EATK(bi)EASTSKEATK(bi)EASTSK_;_EATKEASTSK(bi)EATK(bi)EASTSK_
PF3D7_0202000	P. falciparum	knob-associated histidine-rich protein				21.9386	21.2734	22.0943	21.692	21.8395	22.059							2 Biotin (K)	0	2			22542000	0.0013459	117	47.075	11	NaN	2	1859.88	19.745	EATKEASTSKGATK	117	1	110.35	85.4731	+	NaN	NaN	NaN		572	585	_EATKEASTSK(bi)GATK_;_EATKEASTSK(bi)GATK_;_EATKEASTSK(bi)GATK_;_EATKEASTSK(bi)GATK_;_EATKEASTSK(bi)GATK_;_EATKEASTSK(bi)GATK_;_EATKEASTSK(bi)GATK_;_EATKEASTSK(bi)GATK_;_EATKEASTSK(bi)GATK_;_EATKEASTSK(bi)GATK_;_EATKEASTSK(bi)GATK_;_EATKEASTSK(bi)GATK_;_EATKEAST(ph)SK(bi)GATK_;_EATKEAS(ph)TSK(bi)GATK_;_EATKEAS(ph)TSK(bi)GATK_;_EATKEAS(ph)TSK(bi)GATK_;_EATKEAS(ph)TSK(bi)GATK_;_EATKEAS(ph)TSK(bi)GAT…	EATKEASTSK(0.999)GATK(0.001);EATKEASTSK(0.999)GATK(0.001);EATKEASTSK(0.992)GATK(0.008);EATKEASTSK(0.999)GATK(0.001);EATKEASTSK(0.986)GATK(0.014);EATKEASTSK(1)GATK;EATKEASTSK(1)GATK;EATKEASTSK(0.999)GATK(0.001);EATKEASTSK(0.996)GATK(0.004);EATKEASTSK(1)GATK;EATKEASTSK(0.999)GATK(0.001);EATKEASTSK(0.987)GATK(0.013);EATK(0.004)EASTSK(0.996)GATK;EATKEASTSK(0.994)GATK(0.006);EATK(1)EASTSK(0.98)GATK(0.…	EATK(-86.04)EASTSK(32.25)GATK(-32.25);EATK(-113.48)EASTSK(32.91)GATK(-32.91);EATK(-93.31)EASTSK(20.73)GATK(-20.73);EATK(-82.92)EASTSK(31.19)GATK(-31.19);EATK(-128.86)EASTSK(18.51)GATK(-18.51);EATK(-132.1)EASTSK(33.89)GATK(-33.89);EATK(-58.07)EASTSK(47.5)GATK(-47.5);EATK(-92.94)EASTSK(29.62)GATK(-29.62);EATK(-139.5)EASTSK(23.87)GATK(-23.87);EATK(-77.67)EASTSK(68.56)GATK(-68.56);EATK(-49.71)EASTSK(…	EATKEAS(0.043)T(0.704)S(0.214)KGAT(0.038)K;EAT(0.039)KEAS(0.691)T(0.207)S(0.063)KGATK;EAT(0.005)KEAS(0.926)T(0.055)S(0.014)KGATK;EAT(0.008)KEAS(0.699)T(0.143)S(0.143)KGAT(0.008)K	EAT(-47)KEAS(-12.15)T(5.17)S(-5.17)KGAT(-12.66)K;EAT(-12.48)KEAS(5.23)T(-5.23)S(-10.43)KGAT(-49.35)K;EAT(-22.67)KEAS(12.27)T(-12.27)S(-18.39)KGAT(-49.19)K;EAT(-19.67)KEAS(6.94)T(-6.94)S(-6.94)KGAT(-19.39)K	_EATKEASTSK(bi)GATK_;_EATKEAST(ph)SK(bi)GATK_;_EATKEAS(ph)TSK(bi)GATK_;_EATK(bi)EASTSK(bi)GATK_;_EATK(bi)EASTSKGATK(bi)_
PF3D7_0202000	P. falciparum	knob-associated histidine-rich protein				20.5336	20.241	20.1999	20.6778	20.4603	20.3845							2 Biotin (K)	0	2			8450200	6.73e-10	129.66	85.561	12	3	3	2835.33	19.27	EATKEASTSKGATKEASTTEGATK	117	NaN	NaN	NaN		0.93742	157.59	14.798		572	595	_EATKEASTSK(bi)GATKEASTTEGATK_;_EATKEASTSK(bi)GATKEASTTEGATK_;_EATKEASTSK(bi)GATKEASTTEGATK_;_EATKEASTSK(bi)GATKEASTTEGATK_;_EATKEAS(ph)TSKGATK(bi)EASTTEGATK_;_EATKEAS(ph)TSKGATK(bi)EASTTEGATK_;_EATKEAS(ph)TSKGATK(bi)EASTTEGATK_;_EATKEAS(ph)TSKGATK(bi)EASTTEGATK_;_EATKEAS(ph)TSKGATK(bi)EASTTEGATK_;_EAT(ph)KEASTSKGATK(bi)EASTTEGATK_;_EATKEAS(ph)TSKGATK(bi)EASTTEGATK_;_EAT(ph)KEASTSKGATK(bi)EASTTEG…	EATK(0.001)EASTSK(0.981)GATK(0.018)EASTTEGATK;EATKEASTSK(0.998)GATK(0.001)EASTTEGATK;EATK(0.018)EASTSK(0.974)GATK(0.009)EASTTEGATK;EATKEASTSK(0.014)GATK(0.986)EASTTEGATK;EATKEASTSK(0.016)GATK(0.984)EASTTEGATK;EATKEASTSKGATK(1)EASTTEGATK;EATKEASTSK(0.026)GATK(0.974)EASTTEGATK;EATKEASTSK(0.399)GATK(0.601)EASTTEGATK;EATK(0.13)EASTSK(0.047)GATK(0.823)EASTTEGATK;EATKEASTSKGATK(1)EASTTEGATK;EATK(0.012)…	EATK(-28.51)EASTSK(17.4)GATK(-17.4)EASTTEGATK(-47.48);EATK(-34.92)EASTSK(28.67)GATK(-28.67)EASTTEGATK(-46.6);EATK(-17.42)EASTSK(17.42)GATK(-20.5)EASTTEGATK(-43.89);EATK(-56.35)EASTSK(-18.58)GATK(18.58)EASTTEGATK(-54);EATK(-48.44)EASTSK(-17.98)GATK(17.98)EASTTEGATK(-41.41);EATK(-48.57)EASTSK(-41.05)GATK(41.05)EASTTEGATK(-53.89);EATK(-55.37)EASTSK(-15.81)GATK(15.81)EASTTEGATK(-48.55);EATK(-41.56)EA…	EAT(0.001)KEAS(0.484)T(0.484)S(0.032)KGATKEASTTEGATK;EAT(0.002)KEAS(0.444)T(0.444)S(0.109)KGAT(0.002)KEASTTEGATK;EAT(0.003)KEAS(0.727)T(0.135)S(0.135)KGATKEASTTEGATK;EATKEAS(0.679)T(0.237)S(0.083)KGATKEASTTEGATK;EAT(0.002)KEAS(0.868)T(0.065)S(0.065)KGATKEASTTEGATK;EAT(0.227)KEAS(0.187)T(0.187)S(0.187)KGAT(0.211)KEASTTEGATK;EATKEAS(0.937)T(0.031)S(0.031)KGATKEASTTEGATK;EAT(0.052)KEAS(0.289)T(0.289…	EAT(-29.45)KEAS(0)T(0)S(-11.85)KGAT(-33.64)KEAS(-47.67)T(-46.07)T(-50.45)EGAT(-60.56)K;EAT(-24.25)KEAS(0)T(0)S(-6.09)KGAT(-23.77)KEAS(-41.41)T(-40.38)T(-45.63)EGAT(-63.77)K;EAT(-23.81)KEAS(7.32)T(-7.32)S(-7.32)KGAT(-42.68)KEAS(-66.32)T(-65.06)T(-65.06)EGAT(-85.4)K;EAT(-35.09)KEAS(4.57)T(-4.57)S(-9.12)KGAT(-35.32)KEAS(-67.03)T(-65.56)T(-69.37)EGAT(-75.73)K;EAT(-23.49)KEAS(11.93)T(-11.93)S(-11.93)K…	_EATKEASTSK(bi)GATKEASTTEGATK_;_EATKEAS(ph)TSKGATK(bi)EASTTEGATK_;_EAT(ph)KEASTSKGATK(bi)EASTTEGATK_;_EATKEASTSK(bi)GATK(bi)EASTTEGATK_;_EATK(bi)EASTSKGATK(bi)EASTTEGATK_;_EATKEASTS(ph)K(bi)GATK(bi)EASTTEGATK_
PF3D7_0730900	P. falciparum	EMP1-trafficking protein										25.9825	26.0874	25.8764	24.1946	24.4105	24.4984	2 Biotin (K)	0	2			264490000	1.32e-29	184.14	129.69	34	NaN	3	3079.57	41.895	EAVKPNIDTIKDTLSSGITNIDKR	222	1	131.64	100.146	+	NaN	NaN	NaN		192	215	_EAVKPNIDTIK(bi)DTLSSGITNIDKR_;_EAVKPNIDTIKDTLSSGITNIDK(bi)R_;_EAVKPNIDTIKDTLSSGITNIDK(bi)R_;_EAVKPNIDTIK(bi)DTLSSGITNIDKR_;_EAVKPNIDTIKDTLSSGITNIDK(bi)R_;_EAVKPNIDTIKDTLSSGITNIDK(bi)R_;_EAVKPNIDTIKDTLSSGITNIDK(bi)R_;_EAVKPNIDTIK(bi)DTLSSGITNIDKR_;_EAVKPNIDTIKDTLSSGITNIDK(bi)R_;_EAVKPNIDTIK(bi)DTLSSGITNIDKR_;_EAVKPNIDTIKDTLSSGITNIDK(bi)R_;_EAVKPNIDTIK(bi)DTLSSGITNIDKR_;_EAVKPNIDTIK(bi)DTLSSGITNID…	EAVKPNIDTIK(1)DTLSSGITNIDKR;EAVKPNIDTIKDTLSSGITNIDK(1)R;EAVKPNIDTIKDTLSSGITNIDK(1)R;EAVKPNIDTIK(1)DTLSSGITNIDKR;EAVKPNIDTIKDTLSSGITNIDK(1)R;EAVKPNIDTIKDTLSSGITNIDK(1)R;EAVKPNIDTIKDTLSSGITNIDK(1)R;EAVKPNIDTIK(1)DTLSSGITNIDKR;EAVKPNIDTIKDTLSSGITNIDK(1)R;EAVKPNIDTIK(1)DTLSSGITNIDKR;EAVKPNIDTIKDTLSSGITNIDK(1)R;EAVKPNIDTIK(1)DTLSSGITNIDKR;EAVKPNIDTIK(1)DTLSSGITNIDKR;EAVKPNIDTIKDTLSSGITNIDK(1)R;EAVKPNI…	EAVK(-111.66)PNIDTIK(111.66)DTLSSGITNIDK(-131.55)R;EAVK(-134.06)PNIDTIK(-102.87)DTLSSGITNIDK(102.87)R;EAVK(-63.81)PNIDTIK(-51.92)DTLSSGITNIDK(51.92)R;EAVK(-55.99)PNIDTIK(55.99)DTLSSGITNIDK(-98.04)R;EAVK(-55.39)PNIDTIK(-51.91)DTLSSGITNIDK(51.91)R;EAVK(-47)PNIDTIK(-47)DTLSSGITNIDK(47)R;EAVK(-93.03)PNIDTIK(-73.3)DTLSSGITNIDK(73.3)R;EAVK(-57.05)PNIDTIK(57.05)DTLSSGITNIDK(-73.11)R;EAVK(-78.48)PNIDTIK(…			_EAVKPNIDTIK(bi)DTLSSGITNIDKR_;_EAVKPNIDTIKDTLSSGITNIDK(bi)R_;_EAVK(bi)PNIDTIKDTLSSGITNIDKR_;_EAVKPNIDTIK(bi)DTLSSGITNIDK(bi)R_;_EAVK(bi)PNIDTIK(bi)DTLSSGITNIDKR_
PF3D7_0730900	P. falciparum	EMP1-trafficking protein										22.7392	23.1202	22.0464	24.5638	23.4923	22.2901	2 Biotin (K)	0	2			62102000	0.0014481	69.649	39.58	11	4	3	3619.69	26.332	EDFPYENENNKHSGLNTPKNIPVNNRK	222	NaN	NaN	NaN		NaN	NaN	NaN		1683	1709	_EDFPYENENNK(bi)HSGLNTPK(bi)NIPVNNRK_;_EDFPYENENNK(bi)HSGLNTPK(bi)NIPVNNRK_;_EDFPYENENNK(bi)HSGLNTPK(bi)NIPVNNRK_;_EDFPYENENNK(bi)HSGLNTPK(bi)NIPVNNRK_;_EDFPYENENNK(bi)HSGLNTPK(bi)NIPVNNRK_;_EDFPYENENNK(bi)HSGLNTPK(bi)NIPVNNRK_	EDFPYENENNK(1)HSGLNTPK(0.999)NIPVNNRK(0.001);EDFPYENENNK(1)HSGLNTPK(0.999)NIPVNNRK(0.001);EDFPYENENNK(1)HSGLNTPK(0.994)NIPVNNRK(0.006);EDFPYENENNK(1)HSGLNTPK(0.973)NIPVNNRK(0.027);EDFPYENENNK(1)HSGLNTPK(0.999)NIPVNNRK(0.001);EDFPYENENNK(1)HSGLNTPK(0.998)NIPVNNRK(0.002)	EDFPYENENNK(52.69)HSGLNTPK(28.94)NIPVNNRK(-28.94);EDFPYENENNK(53.28)HSGLNTPK(31.38)NIPVNNRK(-31.38);EDFPYENENNK(36.06)HSGLNTPK(22.12)NIPVNNRK(-22.12);EDFPYENENNK(48.56)HSGLNTPK(15.52)NIPVNNRK(-15.52);EDFPYENENNK(55.03)HSGLNTPK(30.9)NIPVNNRK(-30.9);EDFPYENENNK(49.59)HSGLNTPK(27.84)NIPVNNRK(-27.84)			_EDFPYENENNK(bi)HSGLNTPK(bi)NIPVNNRK_
PF3D7_0201600	P. falciparum	PHISTb domain-containing RESA-like protein 1						19.2019	20.5113	20.5359	20.0498							2 Biotin (K)	0	2			4703300	0.010157	102.06	32.8	2	3	3	1577.84	22.374	EIRDKPIKK	113	NaN	NaN	NaN		NaN	NaN	NaN		472	480	_EIRDKPIK(bi)K_;_EIRDK(bi)PIKK_;_EIRDK(bi)PIKK_;_EIRDKPIK(bi)K_;_EIRDK(bi)PIKK_;_EIRDK(bi)PIKK_;_EIRDK(bi)PIKK_;_EIRDK(bi)PIKK_;_EIRDKPIK(bi)K_;_EIRDKPIK(bi)K_;_EIRDKPIK(bi)K_;_EIRDKPIK(bi)K_;_EIRDK(bi)PIK(bi)K_;_EIRDK(bi)PIKK(bi)_;_EIRDK(bi)PIK(bi)K_;_EIRDK(bi)PIK(bi)K_	EIRDKPIK(0.988)K(0.012);EIRDK(1)PIKK;EIRDK(1)PIKK;EIRDKPIK(0.979)K(0.021);EIRDK(0.987)PIK(0.013)K;EIRDK(1)PIKK;EIRDK(1)PIKK;EIRDK(1)PIK(0.853)K(0.147);EIRDK(1)PIK(0.4)K(0.6)	EIRDK(-49.95)PIK(19.11)K(-19.11);EIRDK(64.15)PIK(-64.15)K(-93.77);EIRDK(71.4)PIK(-71.4)K(-90.62);EIRDK(-55.57)PIK(16.69)K(-16.69);EIRDK(18.92)PIK(-18.92)K(-45.64);EIRDK(68.64)PIK(-68.64)K(-89.87);EIRDK(47.13)PIK(-47.13)K(-64.92);EIRDK(58.41)PIK(7.65)K(-7.65);EIRDK(70.26)PIK(-1.77)K(1.77)			_EIRDKPIK(bi)K_;_EIRDK(bi)PIKK_;_EIRDK(bi)PIK(bi)K_;_EIRDK(bi)PIKK(bi)_
PF3D7_0730900	P. falciparum	EMP1-trafficking protein										26.976	26.5522	26.6595	26.965	26.8741	26.6181	2 Biotin (K)	0	2			693140000	1.16e-17	165.49	118.34	9	NaN	2	2941.34	42.552	EISTPKNYVSEFKNNFDGCLK	222	NaN	NaN	NaN		NaN	NaN	NaN		762	782	_EISTPK(bi)NYVSEFKNNFDGCLK_;_EISTPK(bi)NYVSEFKNNFDGCLK_;_EISTPK(bi)NYVSEFKNNFDGCLK_;_EISTPK(bi)NYVSEFKNNFDGCLK_;_EISTPK(bi)NYVSEFKNNFDGCLK_;_EISTPK(bi)NYVSEFKNNFDGCLK_;_EISTPK(bi)NYVSEFKNNFDGCLK_;_EISTPK(bi)NYVSEFKNNFDGCLK_;_EISTPK(bi)NYVSEFKNNFDGCLK_;_EISTPK(bi)NYVSEFK(bi)NNFDGCLK_;_EISTPK(bi)NYVSEFK(bi)NNFDGCLK_;_EISTPK(bi)NYVSEFK(bi)NNFDGCLK_;_EISTPK(bi)NYVSEFK(bi)NNFDGCLK_;_EISTPK(bi)NYVSEFK(…	EISTPK(1)NYVSEFKNNFDGCLK;EISTPK(1)NYVSEFKNNFDGCLK;EISTPK(1)NYVSEFKNNFDGCLK;EISTPK(1)NYVSEFKNNFDGCLK;EISTPK(1)NYVSEFKNNFDGCLK;EISTPK(1)NYVSEFKNNFDGCLK;EISTPK(1)NYVSEFKNNFDGCLK;EISTPK(1)NYVSEFKNNFDGCLK;EISTPK(1)NYVSEFKNNFDGCLK;EISTPK(1)NYVSEFK(1)NNFDGCLK;EISTPK(1)NYVSEFK(1)NNFDGCLK;EISTPK(1)NYVSEFK(1)NNFDGCLK;EISTPK(1)NYVSEFK(1)NNFDGCLK;EISTPK(1)NYVSEFK(1)NNFDGCLK;EISTPK(1)NYVSEFK(1)NNFDGCLK;EISTPK…	EISTPK(60.21)NYVSEFK(-60.21)NNFDGCLK(-76.66);EISTPK(75.66)NYVSEFK(-75.66)NNFDGCLK(-92.44);EISTPK(44.95)NYVSEFK(-44.95)NNFDGCLK(-56.95);EISTPK(75.35)NYVSEFK(-75.35)NNFDGCLK(-93.98);EISTPK(74.42)NYVSEFK(-74.42)NNFDGCLK(-98.06);EISTPK(88.92)NYVSEFK(-88.92)NNFDGCLK(-112.33);EISTPK(69.34)NYVSEFK(-69.34)NNFDGCLK(-92.1);EISTPK(91.97)NYVSEFK(-91.97)NNFDGCLK(-118.43);EISTPK(75.8)NYVSEFK(-75.8)NNFDGCLK(-92…			_EISTPK(bi)NYVSEFKNNFDGCLK_;_EISTPK(bi)NYVSEFK(bi)NNFDGCLK_
PF3D7_0730900	P. falciparum	EMP1-trafficking protein				22.3375	22.2666		22.5788	22.2468	21.8586	25.5165	25.5463	25.3612	25.797	25.2961	25.5609	2 Biotin (K)	0	2			314430000	8.48e-12	141.64	96.2	22	NaN	3	3069.44	42.345	EISTPKNYVSEFKNNFDGCLKK	222	1	98.727	86.0559	+	NaN	NaN	NaN		762	783	_EISTPK(bi)NYVSEFKNNFDGCLKK_;_EISTPK(bi)NYVSEFKNNFDGCLKK_;_EISTPK(bi)NYVSEFKNNFDGCLKK_;_EISTPK(bi)NYVSEFKNNFDGCLKK_;_EISTPK(bi)NYVSEFKNNFDGCLKK_;_EISTPK(bi)NYVSEFKNNFDGCLKK_;_EISTPK(bi)NYVSEFKNNFDGCLKK_;_EISTPK(bi)NYVSEFKNNFDGCLKK_;_EISTPK(bi)NYVSEFKNNFDGCLKK_;_EISTPK(bi)NYVSEFKNNFDGCLKK_;_EISTPK(bi)NYVSEFKNNFDGCLKK_;_EISTPK(bi)NYVSEFKNNFDGCLKK_;_EISTPK(bi)NYVSEFKNNFDGCLKK_;_EISTPK(bi)NYVSEFKNNFD…	EISTPK(1)NYVSEFKNNFDGCLKK;EISTPK(1)NYVSEFKNNFDGCLKK;EISTPK(1)NYVSEFKNNFDGCLKK;EISTPK(1)NYVSEFKNNFDGCLKK;EISTPK(1)NYVSEFKNNFDGCLKK;EISTPK(1)NYVSEFKNNFDGCLKK;EISTPK(1)NYVSEFKNNFDGCLKK;EISTPK(1)NYVSEFKNNFDGCLKK;EISTPK(1)NYVSEFKNNFDGCLKK;EISTPK(1)NYVSEFKNNFDGCLKK;EISTPK(1)NYVSEFKNNFDGCLKK;EISTPK(1)NYVSEFKNNFDGCLKK;EISTPK(1)NYVSEFKNNFDGCLKK;EISTPK(1)NYVSEFKNNFDGCLKK;EISTPK(1)NYVSEFKNNFDGCLKK;EISTPK(1)…	EISTPK(67.65)NYVSEFK(-67.65)NNFDGCLK(-86.51)K(-86.51);EISTPK(54.45)NYVSEFK(-54.45)NNFDGCLK(-68.41)K(-68.41);EISTPK(41.12)NYVSEFK(-41.12)NNFDGCLK(-66.84)K(-66.7);EISTPK(81.42)NYVSEFK(-81.42)NNFDGCLK(-93.61)K(-93.61);EISTPK(58.25)NYVSEFK(-58.25)NNFDGCLK(-72.81)K(-72.81);EISTPK(71.7)NYVSEFK(-71.7)NNFDGCLK(-83.84)K(-83.84);EISTPK(52.25)NYVSEFK(-52.25)NNFDGCLK(-67.56)K(-67.56);EISTPK(44.74)NYVSEFK(-44…			_EISTPK(bi)NYVSEFKNNFDGCLKK_;_EISTPK(bi)NYVSEFK(bi)NNFDGCLKK_
PF3D7_0730900	P. falciparum	EMP1-trafficking protein										24.8717	24.6096	24.6153	24.9043	24.5696	25.0359	2 Biotin (K)	0	2			172650000	4.39e-22	177.09	126.84	10	3	2	2952.38	42.523	EISTPKNYVSEFKNNFDGGINK	222	NaN	NaN	NaN		NaN	NaN	NaN		652	673	_EISTPK(bi)NYVSEFK(bi)NNFDGGINK_;_EISTPK(bi)NYVSEFK(bi)NNFDGGINK_;_EISTPK(bi)NYVSEFK(bi)NNFDGGINK_;_EISTPK(bi)NYVSEFK(bi)NNFDGGINK_;_EISTPK(bi)NYVSEFK(bi)NNFDGGINK_;_EISTPK(bi)NYVSEFK(bi)NNFDGGINK_	EISTPK(1)NYVSEFK(1)NNFDGGINK;EISTPK(1)NYVSEFK(1)NNFDGGINK;EISTPK(1)NYVSEFK(1)NNFDGGINK;EISTPK(1)NYVSEFK(1)NNFDGGINK;EISTPK(1)NYVSEFK(1)NNFDGGINK;EISTPK(1)NYVSEFK(1)NNFDGGINK	EISTPK(159.95)NYVSEFK(38.08)NNFDGGINK(-38.08);EISTPK(154.09)NYVSEFK(49.36)NNFDGGINK(-49.36);EISTPK(137.17)NYVSEFK(41)NNFDGGINK(-41);EISTPK(139.9)NYVSEFK(38.42)NNFDGGINK(-38.42);EISTPK(131.16)NYVSEFK(45.57)NNFDGGINK(-45.57);EISTPK(137.28)NYVSEFK(34.59)NNFDGGINK(-34.59)			_EISTPK(bi)NYVSEFK(bi)NNFDGGINK_
PF3D7_0730900	P. falciparum	EMP1-trafficking protein										23.5165	24.4676	24.0772	24.7024	23.7796	24.4488	2 Biotin (K)	0	2			117600000	0.00010809	99.219	80.095	10	NaN	3	3619.74	41.362	EISTPKNYVSEFKNNFDGGINKEVSVPR	222	1	95.646	95.6456	+	NaN	NaN	NaN		652	679	_EISTPK(bi)NYVSEFKNNFDGGINKEVSVPR_;_EISTPK(bi)NYVSEFKNNFDGGINKEVSVPR_;_EISTPK(bi)NYVSEFKNNFDGGINKEVSVPR_;_EISTPK(bi)NYVSEFKNNFDGGINKEVSVPR_;_EISTPK(bi)NYVSEFKNNFDGGINKEVSVPR_;_EISTPK(bi)NYVSEFKNNFDGGINKEVSVPR_;_EISTPK(bi)NYVSEFKNNFDGGINKEVSVPR_;_EISTPK(bi)NYVSEFKNNFDGGINKEVSVPR_;_EISTPK(bi)NYVSEFKNNFDGGINKEVSVPR_;_EISTPK(bi)NYVSEFKNNFDGGINKEVSVPR_;_EISTPK(bi)NYVSEFK(bi)NNFDGGINKEVSVPR_;_EISTPK(bi…	EISTPK(1)NYVSEFKNNFDGGINKEVSVPR;EISTPK(1)NYVSEFKNNFDGGINKEVSVPR;EISTPK(0.994)NYVSEFK(0.006)NNFDGGINKEVSVPR;EISTPK(0.961)NYVSEFK(0.039)NNFDGGINKEVSVPR;EISTPK(1)NYVSEFKNNFDGGINKEVSVPR;EISTPK(1)NYVSEFKNNFDGGINKEVSVPR;EISTPK(1)NYVSEFKNNFDGGINKEVSVPR;EISTPK(1)NYVSEFKNNFDGGINKEVSVPR;EISTPK(1)NYVSEFKNNFDGGINKEVSVPR;EISTPK(0.999)NYVSEFK(0.001)NNFDGGINKEVSVPR;EISTPK(1)NYVSEFK(1)NNFDGGINKEVSVPR;EISTPK(1)NY…	EISTPK(50.16)NYVSEFK(-50.16)NNFDGGINK(-105.26)EVSVPR;EISTPK(38.21)NYVSEFK(-38.21)NNFDGGINK(-70.84)EVSVPR;EISTPK(21.98)NYVSEFK(-21.98)NNFDGGINK(-63.68)EVSVPR;EISTPK(13.86)NYVSEFK(-13.86)NNFDGGINK(-45.54)EVSVPR;EISTPK(47.96)NYVSEFK(-47.96)NNFDGGINK(-86.59)EVSVPR;EISTPK(50.71)NYVSEFK(-50.71)NNFDGGINK(-90.9)EVSVPR;EISTPK(47.68)NYVSEFK(-47.68)NNFDGGINK(-103.4)EVSVPR;EISTPK(35.74)NYVSEFK(-35.74)NNFDGGI…			_EISTPK(bi)NYVSEFKNNFDGGINKEVSVPR_;_EISTPK(bi)NYVSEFK(bi)NNFDGGINKEVSVPR_;_EISTPK(bi)NYVSEFKNNFDGGINK(bi)EVSVPR_;_EISTPK(bi)NYVSEFK(bi)NNFDGGINK(bi)EVSVPR_
PF3D7_0730900	P. falciparum	EMP1-trafficking protein										23.5165	22.3874		23.1569	22.6727	23.7389	2 Biotin (K)	0	2			47544000	8.65e-06	109.17	73.488	11	NaN	2	3694.72	42.322	EIYTPKIYVSEFKNNDDGDINNEISTPK	222	1	96.466	82.6442	+	NaN	NaN	NaN		586	613	_EIYTPK(bi)IYVSEFKNNDDGDINNEISTPK_;_EIYTPK(bi)IYVSEFKNNDDGDINNEISTPK_;_EIYTPK(bi)IYVSEFKNNDDGDINNEISTPK_;_EIYTPK(bi)IYVSEFKNNDDGDINNEISTPK_;_EIYTPK(bi)IYVSEFKNNDDGDINNEISTPK_;_EIYTPK(bi)IYVSEFKNNDDGDINNEISTPK_;_EIYTPK(bi)IYVSEFKNNDDGDINNEISTPK_;_EIYTPK(bi)IYVSEFKNNDDGDINNEISTPK_;_EIYTPK(bi)IYVSEFKNNDDGDINNEISTPK_;_EIYTPK(bi)IYVSEFKNNDDGDINNEISTPK_;_EIYTPK(bi)IYVSEFKNNDDGDINNEISTPK_;_EIYTPK(bi)IYV…	EIYTPK(0.986)IYVSEFK(0.014)NNDDGDINNEISTPK;EIYTPK(1)IYVSEFKNNDDGDINNEISTPK;EIYTPK(1)IYVSEFKNNDDGDINNEISTPK;EIYTPK(0.975)IYVSEFK(0.025)NNDDGDINNEISTPK;EIYTPK(1)IYVSEFKNNDDGDINNEISTPK;EIYTPK(1)IYVSEFKNNDDGDINNEISTPK;EIYTPK(1)IYVSEFKNNDDGDINNEISTPK;EIYTPK(1)IYVSEFKNNDDGDINNEISTPK;EIYTPK(1)IYVSEFKNNDDGDINNEISTPK;EIYTPK(1)IYVSEFKNNDDGDINNEISTPK;EIYTPK(1)IYVSEFKNNDDGDINNEISTPK;EIYTPK(1)IYVSEFKNNDDGDINN…	EIYTPK(18.58)IYVSEFK(-18.58)NNDDGDINNEISTPK(-78.45);EIYTPK(37.51)IYVSEFK(-37.51)NNDDGDINNEISTPK(-91.62);EIYTPK(39.85)IYVSEFK(-39.85)NNDDGDINNEISTPK(-96.02);EIYTPK(15.91)IYVSEFK(-15.91)NNDDGDINNEISTPK(-58.36);EIYTPK(38.27)IYVSEFK(-38.27)NNDDGDINNEISTPK(-79.83);EIYTPK(58.34)IYVSEFK(-58.34)NNDDGDINNEISTPK(-104.36);EIYTPK(34.88)IYVSEFK(-34.88)NNDDGDINNEISTPK(-83.66);EIYTPK(51.5)IYVSEFK(-51.5)NNDDGDIN…			_EIYTPK(bi)IYVSEFKNNDDGDINNEISTPK_;_EIYTPK(bi)IYVSEFK(bi)NNDDGDINNEISTPK_
PF3D7_0730900	P. falciparum	EMP1-trafficking protein										22.3137	22.4187	22.1684	22.4419	22.5329	22.4397	2 Biotin (K)	0	2			32988000	0.0011894	81.357	39.1	7	4	3	2796.33	29.253	EKNNTQNETHKLKSDIGNFK	222	NaN	NaN	NaN		NaN	NaN	NaN		1752	1771	_EKNNTQNETHKLK(bi)SDIGNFK_;_EKNNTQNETHKLK(bi)SDIGNFK_;_EKNNTQNETHKLK(bi)SDIGNFK_;_EKNNTQNETHKLK(bi)SDIGNFK_;_EKNNTQNETHKLK(bi)SDIGNFK_;_EKNNTQNETHKLK(bi)SDIGNFK_;_EKNNTQNETHKLK(bi)SDIGNFK_;_EKNNTQNETHKLK(bi)SDIGNFK_;_EKNNTQNETHKLK(bi)SDIGNFK_;_EKNNTQNETHKLK(bi)SDIGNFK_;_EKNNTQNETHK(bi)LK(bi)SDIGNFK_;_EKNNTQNETHK(bi)LK(bi)SDIGNFK_;_EKNNTQNETHK(bi)LK(bi)SDIGNFK_;_EKNNTQNETHK(bi)LK(bi)SDIGNFK_;_EKNN…	EK(0.001)NNTQNETHK(0.041)LK(0.944)SDIGNFK(0.014);EKNNTQNETHK(0.017)LK(0.983)SDIGNFK;EKNNTQNETHK(0.017)LK(0.979)SDIGNFK(0.004);EKNNTQNETHK(0.06)LK(0.935)SDIGNFK(0.005);EKNNTQNETHK(0.049)LK(0.951)SDIGNFK(0.001);EKNNTQNETHK(0.088)LK(0.912)SDIGNFK;EKNNTQNETHK(0.03)LK(0.97)SDIGNFK;EKNNTQNETHK(0.154)LK(0.844)SDIGNFK(0.001);EKNNTQNETHK(0.025)LK(0.975)SDIGNFK;EKNNTQNETHK(1)LK(0.999)SDIGNFK(0.001);EKNNTQN…	EK(-30.1)NNTQNETHK(-13.62)LK(13.62)SDIGNFK(-18.4);EK(-96.79)NNTQNETHK(-17.6)LK(17.6)SDIGNFK(-41.07);EK(-45.31)NNTQNETHK(-17.71)LK(17.71)SDIGNFK(-23.47);EK(-41.73)NNTQNETHK(-11.95)LK(11.95)SDIGNFK(-22.43);EK(-45.62)NNTQNETHK(-12.92)LK(12.92)SDIGNFK(-32.21);EK(-42.22)NNTQNETHK(-10.16)LK(10.16)SDIGNFK(-36.98);EK(-45.54)NNTQNETHK(-15.13)LK(15.13)SDIGNFK(-35.22);EK(-34.06)NNTQNETHK(-7.4)LK(7.4)SDIGNFK…			_EKNNTQNETHKLK(bi)SDIGNFK_;_EKNNTQNETHK(bi)LK(bi)SDIGNFK_
PF3D7_0730900	P. falciparum	EMP1-trafficking protein										25.8385	26.2607	25.3443	25.7364	26.0914	26.452	2 Biotin (K)	0	2			402130000	4.64e-08	164.88	123.9	7	NaN	2	2289.08	16.436	EKTLGKHEHHEDHLK	222	NaN	NaN	NaN		NaN	NaN	NaN		1904	1918	_EK(bi)TLGKHEHHEDHLK_;_EK(bi)TLGKHEHHEDHLK_;_EK(bi)TLGKHEHHEDHLK_;_EK(bi)TLGKHEHHEDHLK_;_EK(bi)TLGKHEHHEDHLK_;_EK(bi)TLGKHEHHEDHLK_;_EK(bi)TLGKHEHHEDHLK_;_EK(bi)TLGKHEHHEDHLK_;_EK(bi)TLGKHEHHEDHLK_;_EK(bi)TLGKHEHHEDHLK_;_EK(bi)TLGKHEHHEDHLK_;_EK(bi)TLGKHEHHEDHLK_;_EK(bi)TLGKHEHHEDHLK_;_EK(bi)TLGKHEHHEDHLK_;_EK(bi)TLGKHEHHEDHLK_;_EK(bi)TLGKHEHHEDHLK_;_EK(bi)TLGKHEHHEDHLK_;_EK(bi)TLGKHEHHEDHLK_;_EK…	EK(0.959)TLGK(0.041)HEHHEDHLK;EK(1)TLGKHEHHEDHLK;EK(0.995)TLGK(0.005)HEHHEDHLK;EK(0.644)TLGK(0.356)HEHHEDHLK;EK(1)TLGKHEHHEDHLK;EK(0.973)TLGK(0.027)HEHHEDHLK;EK(0.99)TLGK(0.01)HEHHEDHLK;EK(0.998)TLGK(0.002)HEHHEDHLK;EK(1)TLGKHEHHEDHLK;EK(0.997)TLGK(0.003)HEHHEDHLK;EK(0.97)TLGK(0.03)HEHHEDHLK;EK(1)TLGKHEHHEDHLK;EK(0.989)TLGK(0.011)HEHHEDHLK;EK(0.98)TLGK(0.02)HEHHEDHLK;EK(0.998)TLGK(0.002)HEHHEDHLK…	EK(13.69)TLGK(-13.69)HEHHEDHLK(-82.65);EK(35.89)TLGK(-35.89)HEHHEDHLK(-137.68);EK(22.59)TLGK(-22.59)HEHHEDHLK(-67.26);EK(2.58)TLGK(-2.58)HEHHEDHLK(-82.81);EK(47.04)TLGK(-47.04)HEHHEDHLK(-117.76);EK(15.58)TLGK(-15.58)HEHHEDHLK(-61.82);EK(20.07)TLGK(-20.07)HEHHEDHLK(-53.99);EK(26.94)TLGK(-26.94)HEHHEDHLK(-97.66);EK(38.39)TLGK(-38.39)HEHHEDHLK(-132.98);EK(25.79)TLGK(-25.79)HEHHEDHLK(-63.28);EK(15.03…			_EK(bi)TLGKHEHHEDHLK_;_EK(bi)TLGK(bi)HEHHEDHLK_
PF3D7_0730900	P. falciparum	EMP1-trafficking protein										25.8044	26.1946	25.4707	25.989	25.7156	26.4707	2 Biotin (K)	0	2			396800000	3.86e-11	172.26	129.55	44	NaN	3	2474.19	14.585	EKTLGKHEHHEDHLKGK	222	NaN	NaN	NaN		NaN	NaN	NaN		1904	1920	_EKTLGK(bi)HEHHEDHLKGK_;_EKTLGK(bi)HEHHEDHLKGK_;_EK(bi)TLGKHEHHEDHLKGK_;_EK(bi)TLGKHEHHEDHLKGK_;_EK(bi)TLGKHEHHEDHLKGK_;_EK(bi)TLGKHEHHEDHLKGK_;_EK(bi)TLGKHEHHEDHLKGK_;_EKTLGK(bi)HEHHEDHLKGK_;_EK(bi)TLGKHEHHEDHLKGK_;_EK(bi)TLGKHEHHEDHLKGK_;_EK(bi)TLGKHEHHEDHLKGK_;_EKTLGK(bi)HEHHEDHLKGK_;_EKTLGK(bi)HEHHEDHLKGK_;_EKTLGK(bi)HEHHEDHLKGK_;_EK(bi)TLGKHEHHEDHLKGK_;_EK(bi)TLGKHEHHEDHLKGK_;_EK(bi)TLGKHEHH…	EK(0.255)TLGK(0.745)HEHHEDHLKGK;EK(0.071)TLGK(0.929)HEHHEDHLKGK;EK(0.603)TLGK(0.397)HEHHEDHLKGK;EK(0.994)TLGK(0.006)HEHHEDHLKGK;EK(0.841)TLGK(0.159)HEHHEDHLKGK;EK(0.866)TLGK(0.134)HEHHEDHLKGK;EK(0.593)TLGK(0.407)HEHHEDHLKGK;EK(0.003)TLGK(0.997)HEHHEDHLKGK;EK(0.888)TLGK(0.112)HEHHEDHLKGK;EK(0.5)TLGK(0.5)HEHHEDHLKGK;EK(0.999)TLGK(0.001)HEHHEDHLKGK;EK(0.083)TLGK(0.917)HEHHEDHLKGK;EK(0.108)TLGK(0.89)…	EK(-4.66)TLGK(4.66)HEHHEDHLK(-34.63)GK(-39.35);EK(-11.19)TLGK(11.19)HEHHEDHLK(-57.94)GK(-62.2);EK(1.82)TLGK(-1.82)HEHHEDHLK(-42.16)GK(-50.05);EK(21.85)TLGK(-21.85)HEHHEDHLK(-105.23)GK(-107.43);EK(7.23)TLGK(-7.23)HEHHEDHLK(-66.85)GK(-72.07);EK(8.09)TLGK(-8.09)HEHHEDHLK(-69.62)GK(-74.84);EK(1.63)TLGK(-1.63)HEHHEDHLK(-36.74)GK(-40.07);EK(-25.2)TLGK(25.2)HEHHEDHLK(-33.88)GK(-44.88);EK(8.99)TLGK(-8.99…			_EKTLGK(bi)HEHHEDHLKGK_;_EK(bi)TLGKHEHHEDHLKGK_;_EK(bi)TLGKHEHHEDHLK(bi)GK_;_EK(bi)TLGK(bi)HEHHEDHLKGK_;_EK(bi)TLGK(bi)HEHHEDHLK(bi)GK_
PF3D7_0730900	P. falciparum	EMP1-trafficking protein					21.4262	20.4169	21.6059	21.8578	21.9392	28.4746	28.7549	28.1164	28.7549	28.3704	28.4668	2 Biotin (K)	0	2			2303300000	1.28e-16	208.38	118.47	34	NaN	2	2315.08	18.54	EKTLGKHEHHEEYVK	222	NaN	NaN	NaN		NaN	NaN	NaN		1882	1896	_EK(bi)TLGKHEHHEEYVK_;_EK(bi)TLGKHEHHEEYVK_;_EK(bi)TLGKHEHHEEYVK_;_EK(bi)TLGKHEHHEEYVK_;_EK(bi)TLGKHEHHEEYVK_;_EKTLGK(bi)HEHHEEYVK_;_EK(bi)TLGKHEHHEEYVK_;_EK(bi)TLGKHEHHEEYVK_;_EK(bi)TLGKHEHHEEYVK_;_EKTLGK(bi)HEHHEEYVK_;_EK(bi)TLGKHEHHEEYVK_;_EK(bi)TLGKHEHHEEYVK_;_EKTLGK(bi)HEHHEEYVK_;_EKTLGK(bi)HEHHEEYVK_;_EK(bi)TLGKHEHHEEYVK_;_EK(bi)TLGKHEHHEEYVK_;_EK(bi)TLGKHEHHEEYVK_;_EK(bi)TLGKHEHHEEYVK_;_EK…	EK(0.999)TLGK(0.001)HEHHEEYVK;EK(0.999)TLGK(0.001)HEHHEEYVK;EK(1)TLGKHEHHEEYVK;EK(0.742)TLGK(0.258)HEHHEEYVK;EK(1)TLGKHEHHEEYVK;EKTLGK(1)HEHHEEYVK;EK(0.999)TLGK(0.001)HEHHEEYVK;EK(0.995)TLGK(0.005)HEHHEEYVK;EK(1)TLGKHEHHEEYVK;EK(0.035)TLGK(0.965)HEHHEEYVK;EK(0.992)TLGK(0.008)HEHHEEYVK;EK(0.991)TLGK(0.009)HEHHEEYVK;EKTLGK(1)HEHHEEYVK;EK(0.109)TLGK(0.891)HEHHEEYVK;EK(1)TLGKHEHHEEYVK;EK(1)TLGKHEHHEE…	EK(31.52)TLGK(-31.52)HEHHEEYVK(-68.13);EK(31.43)TLGK(-31.43)HEHHEEYVK(-89.96);EK(41.26)TLGK(-41.26)HEHHEEYVK(-103.6);EK(4.59)TLGK(-4.59)HEHHEEYVK(-36.44);EK(40.58)TLGK(-40.58)HEHHEEYVK(-85.93);EK(-51.95)TLGK(51.95)HEHHEEYVK(-73.29);EK(30.05)TLGK(-30.05)HEHHEEYVK(-101.53);EK(23.22)TLGK(-23.22)HEHHEEYVK(-88.86);EK(44.29)TLGK(-44.29)HEHHEEYVK(-78.27);EK(-14.42)TLGK(14.42)HEHHEEYVK(-60.29);EK(20.83)T…			_EK(bi)TLGKHEHHEEYVK_;_EKTLGK(bi)HEHHEEYVK_;_EK(bi)TLGK(bi)HEHHEEYVK_
PF3D7_0730900	P. falciparum	EMP1-trafficking protein								20.7332	20.3767	25.5285	26.4008	25.1174	25.5344	26.1194	26.6865	2 Biotin (K)	0	2			406130000	6.25e-35	249.54	179.34	37	NaN	3	2500.2	16.159	EKTLGKHEHHEEYVKGK	222	NaN	NaN	NaN		NaN	NaN	NaN		1882	1898	_EK(bi)TLGKHEHHEEYVKGK_;_EK(bi)TLGKHEHHEEYVKGK_;_EKTLGK(bi)HEHHEEYVKGK_;_EK(bi)TLGKHEHHEEYVKGK_;_EK(bi)TLGKHEHHEEYVKGK_;_EK(bi)TLGKHEHHEEYVKGK_;_EK(bi)TLGKHEHHEEYVKGK_;_EK(bi)TLGKHEHHEEYVKGK_;_EKTLGKHEHHEEYVK(bi)GK_;_EK(bi)TLGKHEHHEEYVKGK_;_EKTLGKHEHHEEYVK(bi)GK_;_EK(bi)TLGKHEHHEEYVKGK_;_EK(bi)TLGKHEHHEEYVKGK_;_EKTLGK(bi)HEHHEEYVKGK_;_EKTLGKHEHHEEYVK(bi)GK_;_EK(bi)TLGKHEHHEEYVKGK_;_EK(bi)TLGKHEHH…	EK(0.824)TLGK(0.176)HEHHEEYVKGK;EK(0.999)TLGK(0.001)HEHHEEYVKGK;EK(0.006)TLGK(0.994)HEHHEEYVKGK;EK(0.952)TLGK(0.048)HEHHEEYVKGK;EK(0.988)TLGK(0.012)HEHHEEYVKGK;EK(0.694)TLGK(0.306)HEHHEEYVKGK;EK(0.99)TLGK(0.01)HEHHEEYVKGK;EK(0.824)TLGK(0.176)HEHHEEYVKGK;EKTLGKHEHHEEYVK(0.941)GK(0.059);EK(0.986)TLGK(0.014)HEHHEEYVKGK;EKTLGKHEHHEEYVK(0.97)GK(0.03);EK(0.907)TLGK(0.093)HEHHEEYVKGK;EK(0.98)TLGK(0.02)H…	EK(6.7)TLGK(-6.7)HEHHEEYVK(-36.39)GK(-42.5);EK(28.35)TLGK(-28.35)HEHHEEYVK(-57.95)GK(-64.58);EK(-22.21)TLGK(22.21)HEHHEEYVK(-37.13)GK(-45.55);EK(13)TLGK(-13)HEHHEEYVK(-44.59)GK(-50.71);EK(18.99)TLGK(-18.99)HEHHEEYVK(-57.04)GK(-63.66);EK(3.56)TLGK(-3.56)HEHHEEYVK(-50.62)GK(-54.4);EK(20.08)TLGK(-20.08)HEHHEEYVK(-44.64)GK(-51.26);EK(6.69)TLGK(-6.69)HEHHEEYVK(-56.86)GK(-61.84);EK(-66.53)TLGK(-60.25)H…	EKT(1)LGKHEHHEEYVKGK;EKT(1)LGKHEHHEEYVKGK	EKT(50.19)LGKHEHHEEY(-50.19)VKGK;EKT(53.64)LGKHEHHEEY(-53.64)VKGK	_EK(bi)TLGKHEHHEEYVKGK_;_EKTLGK(bi)HEHHEEYVKGK_;_EKTLGKHEHHEEYVK(bi)GK_;_EKT(ph)LGKHEHHEEYVK(bi)GK_;_EK(bi)TLGKHEHHEEYVK(bi)GK_;_EKTLGK(bi)HEHHEEYVK(bi)GK_;_EK(bi)TLGK(bi)HEHHEEYVKGK_;_EK(bi)TLGK(bi)HEHHEEYVK(bi)GK_
PF3D7_0730900	P. falciparum	EMP1-trafficking protein										30.1361	30.3515	30.2869	30.5481	30.393	30.3303	2 Biotin (K)	0	2			8203300000	2.48e-17	241.96	104.83	25	NaN	2	1391.71	21.02	EKTLGKHK	222	NaN	NaN	NaN		NaN	NaN	NaN		1970	1977	_EK(bi)TLGK(bi)HK_;_EK(bi)TLGK(bi)HK_;_EK(bi)TLGK(bi)HK_;_EK(bi)TLGK(bi)HK_;_EK(bi)TLGK(bi)HK_;_EK(bi)TLGK(bi)HK_;_EK(bi)TLGK(bi)HK_;_EK(bi)TLGK(bi)HK_;_EK(bi)TLGK(bi)HK_;_EK(bi)TLGK(bi)HK_;_EK(bi)TLGK(bi)HK_;_EK(bi)TLGK(bi)HK_;_EK(bi)TLGK(bi)HK_;_EK(bi)TLGK(bi)HK_;_EK(bi)TLGK(bi)HK_;_EK(bi)TLGK(bi)HK_;_EK(bi)TLGK(bi)HK_;_EK(bi)TLGK(bi)HK_;_EK(bi)TLGK(bi)HK_;_EK(bi)TLGK(bi)HK_;_EK(bi)TLGK(bi)HK_;…	EK(1)TLGK(1)HK;EK(1)TLGK(1)HK;EK(1)TLGK(0.5)HK(0.5);EK(1)TLGK(0.998)HK(0.002);EK(1)TLGK(1)HK;EK(1)TLGK(1)HK;EK(1)TLGK(0.841)HK(0.159);EK(1)TLGK(1)HK;EK(1)TLGK(1)HK;EK(1)TLGK(1)HK;EK(1)TLGK(1)HK;EK(1)TLGK(1)HK;EK(1)TLGK(1)HK;EK(1)TLGK(1)HK;EK(1)TLGK(1)HK;EKTLGK(0.999)HK(0.001);EKTLGK(0.997)HK(0.003);EKTLGK(1)HK	EK(185.69)TLGK(99.77)HK(-99.77);EK(194.5)TLGK(98.18)HK(-98.18);EK(57.28)TLGK(0)HK(0);EK(78.65)TLGK(27.98)HK(-27.98);EK(222.85)TLGK(121.09)HK(-121.09);EK(134.64)TLGK(68.46)HK(-68.46);EK(57.64)TLGK(7.25)HK(-7.25);EK(209)TLGK(122.45)HK(-122.45);EK(86.81)TLGK(52.35)HK(-52.35);EK(166.31)TLGK(86.91)HK(-86.91);EK(199.4)TLGK(105.88)HK(-105.88);EK(146.54)TLGK(61.31)HK(-61.31);EK(200.97)TLGK(104.13)HK(-104…			_EK(bi)TLGK(bi)HK_;_EKTLGK(bi)HK_
PF3D7_0730900	P. falciparum	EMP1-trafficking protein										25.2678	26.17	25.3031	25.6125	25.452	26.1449	2 Biotin (K)	0	2			328630000	7.8e-09	171.26	111.58	22	NaN	3	2288.13	14.072	EKTLGKHKHHEDHLK	222	1	112.12	109.236	+	NaN	NaN	NaN		1970	1984	_EK(bi)TLGK(bi)HKHHEDHLK_;_EK(bi)TLGK(bi)HKHHEDHLK_;_EK(bi)TLGK(bi)HKHHEDHLK_;_EK(bi)TLGK(bi)HKHHEDHLK_;_EK(bi)TLGK(bi)HKHHEDHLK_;_EK(bi)TLGK(bi)HKHHEDHLK_;_EK(bi)TLGK(bi)HKHHEDHLK_;_EK(bi)TLGK(bi)HKHHEDHLK_;_EK(bi)TLGK(bi)HKHHEDHLK_;_EK(bi)TLGK(bi)HKHHEDHLK_;_EK(bi)TLGK(bi)HKHHEDHLK_;_EK(bi)TLGK(bi)HKHHEDHLK_;_EK(bi)TLGK(bi)HKHHEDHLK_;_EK(bi)TLGK(bi)HK(bi)HHEDHLK_;_EK(bi)TLGK(bi)HK(bi)HHEDHLK_;_…	EK(1)TLGK(0.914)HK(0.086)HHEDHLK;EK(0.991)TLGK(0.958)HK(0.051)HHEDHLK;EK(1)TLGK(0.999)HK(0.001)HHEDHLK;EK(1)TLGK(0.994)HK(0.006)HHEDHLK;EK(1)TLGK(0.991)HK(0.009)HHEDHLK;EK(0.993)TLGK(0.958)HK(0.049)HHEDHLK;EK(1)TLGK(0.979)HK(0.021)HHEDHLK;EK(0.995)TLGK(0.759)HK(0.246)HHEDHLK;EK(1)TLGK(0.964)HK(0.036)HHEDHLK;EK(0.954)TLGK(0.841)HK(0.205)HHEDHLK;EK(1)TLGK(0.976)HK(0.024)HHEDHLK;EK(0.999)TLGK(0.998)…	EK(56.92)TLGK(10.24)HK(-10.24)HHEDHLK(-56.28);EK(20.38)TLGK(13.53)HK(-13.53)HHEDHLK(-44.52);EK(86.25)TLGK(32.71)HK(-32.71)HHEDHLK(-129.63);EK(56.65)TLGK(22.16)HK(-22.16)HHEDHLK(-64.22);EK(56.08)TLGK(20.4)HK(-20.4)HHEDHLK(-69.45);EK(21.13)TLGK(13.53)HK(-13.53)HHEDHLK(-61.71);EK(62.38)TLGK(16.65)HK(-16.65)HHEDHLK(-60.09);EK(21.94)TLGK(4.96)HK(-4.96)HHEDHLK(-55.12);EK(58.45)TLGK(14.29)HK(-14.29)HHED…			_EK(bi)TLGK(bi)HKHHEDHLK_;_EK(bi)TLGK(bi)HK(bi)HHEDHLK_
PF3D7_0730900	P. falciparum	EMP1-trafficking protein										25.1527	25.2926	24.7543	25.1293	24.7995	24.7895	2 Biotin (K)	0	2			201580000	0.00043194	120.21	66.905	24	NaN	2	2264.08	19.308	EKVLGKNEHHEDHLK	222	NaN	NaN	NaN		NaN	NaN	NaN		1860	1874	_EK(bi)VLGKNEHHEDHLK_;_EK(bi)VLGKNEHHEDHLK_;_EK(bi)VLGKNEHHEDHLK_;_EK(bi)VLGKNEHHEDHLK_;_EK(bi)VLGKNEHHEDHLK_;_EK(bi)VLGKNEHHEDHLK_;_EK(bi)VLGKNEHHEDHLK_;_EK(bi)VLGKNEHHEDHLK_;_EKVLGK(bi)NEHHEDHLK_;_EK(bi)VLGKNEHHEDHLK_;_EK(bi)VLGKNEHHEDHLK_;_EK(bi)VLGKNEHHEDHLK_;_EKVLGK(bi)NEHHEDHLK_;_EKVLGK(bi)NEHHEDHLK_;_EK(bi)VLGKNEHHEDHLK_;_EK(bi)VLGKNEHHEDHLK_;_EK(bi)VLGKNEHHEDHLK_;_EKVLGK(bi)NEHHEDHLK_;_EK…	EK(0.987)VLGK(0.013)NEHHEDHLK;EK(0.865)VLGK(0.135)NEHHEDHLK;EK(0.951)VLGK(0.049)NEHHEDHLK;EK(0.952)VLGK(0.048)NEHHEDHLK;EK(0.993)VLGK(0.007)NEHHEDHLK;EK(0.999)VLGK(0.001)NEHHEDHLK;EK(1)VLGKNEHHEDHLK;EK(0.934)VLGK(0.066)NEHHEDHLK;EK(0.46)VLGK(0.54)NEHHEDHLK;EK(1)VLGKNEHHEDHLK;EK(0.966)VLGK(0.034)NEHHEDHLK;EK(0.939)VLGK(0.061)NEHHEDHLK;EK(0.365)VLGK(0.635)NEHHEDHLK;EK(0.116)VLGK(0.883)NEHHEDHLK(0.0…	EK(18.88)VLGK(-18.88)NEHHEDHLK(-55.18);EK(8.08)VLGK(-8.08)NEHHEDHLK(-65.34);EK(12.9)VLGK(-12.9)NEHHEDHLK(-52.31);EK(12.98)VLGK(-12.98)NEHHEDHLK(-48.37);EK(21.78)VLGK(-21.78)NEHHEDHLK(-58.38);EK(29.95)VLGK(-29.95)NEHHEDHLK(-79.49);EK(64.43)VLGK(-64.43)NEHHEDHLK(-129.5);EK(11.49)VLGK(-11.49)NEHHEDHLK(-51.09);EK(-0.7)VLGK(0.7)NEHHEDHLK(-41.65);EK(61.85)VLGK(-61.85)NEHHEDHLK(-146.08);EK(14.51)VLGK(-1…			_EK(bi)VLGKNEHHEDHLK_;_EKVLGK(bi)NEHHEDHLK_;_EK(bi)VLGK(bi)NEHHEDHLK_
PF3D7_0730900	P. falciparum	EMP1-trafficking protein										21.5966		20.0688	20.6808	21.1607		2 Biotin (K)	0	2			8296100	0.010267	64.588	26.89	2	5	3	2449.2	17.272	EKVLGKNEHHEDHLKGK	222	NaN	NaN	NaN		NaN	NaN	NaN		1860	1876	_EK(bi)VLGKNEHHEDHLKGK_;_EK(bi)VLGKNEHHEDHLKGK_;_EK(bi)VLGKNEHHEDHLKGK_;_EK(bi)VLGKNEHHEDHLKGK_;_EK(bi)VLGKNEHHEDHLKGK_;_EK(bi)VLGKNEHHEDHLKGK_;_EK(bi)VLGKNEHHEDHLKGK_;_EKVLGK(bi)NEHHEDHLKGK_;_EK(bi)VLGKNEHHEDHLKGK_;_EK(bi)VLGKNEHHEDHLKGK_;_EK(bi)VLGKNEHHEDHLKGK_;_EK(bi)VLGKNEHHEDHLKGK_;_EKVLGK(bi)NEHHEDHLKGK_;_EKVLGK(bi)NEHHEDHLKGK_;_EKVLGK(bi)NEHHEDHLKGK_;_EKVLGK(bi)NEHHEDHLKGK_;_EK(bi)VLGK(bi)…	EK(0.832)VLGK(0.168)NEHHEDHLKGK;EK(0.647)VLGK(0.353)NEHHEDHLKGK;EK(0.997)VLGK(0.003)NEHHEDHLKGK;EK(0.5)VLGK(0.5)NEHHEDHLKGK;EK(0.832)VLGK(0.168)NEHHEDHLKGK;EK(0.953)VLGK(0.047)NEHHEDHLKGK;EK(0.609)VLGK(0.391)NEHHEDHLKGK;EK(0.014)VLGK(0.986)NEHHEDHLKGK;EK(0.996)VLGK(0.004)NEHHEDHLKGK;EK(0.897)VLGK(0.103)NEHHEDHLKGK;EK(0.998)VLGK(0.975)NEHHEDHLK(0.013)GK(0.014);EK(1)VLGK(0.999)NEHHEDHLK(0.001)GK;EK…	EK(6.93)VLGK(-6.93)NEHHEDHLK(-45.77)GK(-48.62);EK(2.63)VLGK(-2.63)NEHHEDHLK(-71.47)GK(-75.36);EK(25.5)VLGK(-25.5)NEHHEDHLK(-58.59)GK(-72.92);EK(0)VLGK(0)NEHHEDHLK(-44.72)GK(-47.55);EK(6.93)VLGK(-6.93)NEHHEDHLK(-63)GK(-65.06);EK(13.09)VLGK(-13.09)NEHHEDHLK(-56.77)GK(-58.41);EK(1.93)VLGK(-1.93)NEHHEDHLK(-51.86)GK(-54.45);EK(-18.54)VLGK(18.54)NEHHEDHLK(-56.67)GK(-60.93);EK(23.68)VLGK(-23.68)NEHHEDHL…			_EK(bi)VLGKNEHHEDHLKGK_;_EKVLGK(bi)NEHHEDHLKGK_;_EK(bi)VLGK(bi)NEHHEDHLKGK_
PF3D7_0532300	P. falciparum	Plasmodium exported protein (PHISTb), unknown function				22.7901	22.9794		21.966	23.2961	22.988							2 Biotin (K)	0	2			38231000	2.88e-10	136.64	97.912	14	NaN	3	3373.56	42.098	EMESKVEKLAENQVEKEFQEVNER	184	1	101.6	83.388	+	NaN	NaN	NaN		434	457	_EM(ox)ESKVEK(bi)LAENQVEKEFQEVNER_;_EM(ox)ESK(bi)VEKLAENQVEKEFQEVNER_;_EM(ox)ESK(bi)VEKLAENQVEKEFQEVNER_;_EM(ox)ESKVEK(bi)LAENQVEKEFQEVNER_;_EM(ox)ESKVEK(bi)LAENQVEKEFQEVNER_;_EM(ox)ESK(bi)VEKLAENQVEKEFQEVNER_;_EM(ox)ESK(bi)VEKLAENQVEKEFQEVNER_;_EM(ox)ESKVEK(bi)LAENQVEKEFQEVNER_;_EM(ox)ESK(bi)VEKLAENQVEKEFQEVNER_;_EM(ox)ESKVEK(bi)LAENQVEKEFQEVNER_;_EM(ox)ESK(bi)VEKLAENQVEKEFQEVNER_;_EM(ox)ESK(bi)…	EMESK(0.008)VEK(0.992)LAENQVEKEFQEVNER;EMESK(0.983)VEK(0.017)LAENQVEKEFQEVNER;EMESK(0.98)VEK(0.02)LAENQVEKEFQEVNER;EMESK(0.183)VEK(0.817)LAENQVEKEFQEVNER;EMESK(0.032)VEK(0.968)LAENQVEKEFQEVNER;EMESK(0.981)VEK(0.019)LAENQVEKEFQEVNER;EMESK(0.993)VEK(0.007)LAENQVEKEFQEVNER;EMESK(0.238)VEK(0.762)LAENQVEKEFQEVNER;EMESK(0.861)VEK(0.139)LAENQVEKEFQEVNER;EMESK(0.109)VEK(0.891)LAENQVEKEFQEVNER;EMESK(0.972…	EMESK(-20.94)VEK(20.94)LAENQVEK(-60.89)EFQEVNER;EMESK(17.71)VEK(-17.71)LAENQVEK(-75.49)EFQEVNER;EMESK(16.96)VEK(-16.96)LAENQVEK(-93.25)EFQEVNER;EMESK(-6.51)VEK(6.51)LAENQVEK(-72.02)EFQEVNER;EMESK(-14.81)VEK(14.81)LAENQVEK(-43.42)EFQEVNER;EMESK(17.13)VEK(-17.13)LAENQVEK(-67.6)EFQEVNER;EMESK(21.67)VEK(-21.67)LAENQVEK(-87.41)EFQEVNER;EMESK(-5.06)VEK(5.06)LAENQVEK(-62.95)EFQEVNER;EMESK(7.92)VEK(-7.92…			_EM(ox)ESKVEK(bi)LAENQVEKEFQEVNER_;_EM(ox)ESK(bi)VEKLAENQVEKEFQEVNER_;_EMESKVEK(bi)LAENQVEKEFQEVNER_;_EMESK(bi)VEKLAENQVEKEFQEVNER_;_EMESK(bi)VEK(bi)LAENQVEKEFQEVNER_;_EM(ox)ESK(bi)VEK(bi)LAENQVEKEFQEVNER_
PF3D7_0730900	P. falciparum	EMP1-trafficking protein										23.8093	23.4425	24.1719		23.391		2 Biotin (K)	0	2			55957000	1.31e-78	276.34	187.38	3	3	2	2246.99	25.618	EMSIHDGMKGQKYGSK	222	NaN	NaN	NaN		NaN	NaN	NaN		1176	1191	_EMSIHDGMKGQK(bi)YGSK_;_EMSIHDGMKGQK(bi)YGSK_;_EMSIHDGMKGQK(bi)YGSK_;_EMSIHDGM(ox)K(bi)GQK(bi)YGSK_;_EMSIHDGM(ox)K(bi)GQK(bi)YGSK_;_EM(ox)SIHDGMK(bi)GQK(bi)YGSK_;_EMSIHDGM(ox)K(bi)GQK(bi)YGSK_;_EMSIHDGM(ox)K(bi)GQK(bi)YGSK_;_EMSIHDGM(ox)K(bi)GQK(bi)YGSK_;_EMSIHDGMK(bi)GQK(bi)YGSK_;_EMSIHDGMK(bi)GQK(bi)YGSK_;_EMSIHDGMK(bi)GQK(bi)YGSK_;_EMSIHDGMK(bi)GQK(bi)YGSK_;_EMSIHDGMK(bi)GQK(bi)YGSK_;_EMSIHDGM…	EMSIHDGMK(0.191)GQK(0.733)YGSK(0.076);EMSIHDGMKGQK(0.965)YGSK(0.035);EMSIHDGMK(1)GQK(0.955)YGSK(0.045);EMSIHDGMK(1)GQK(0.944)YGSK(0.056);EMSIHDGMK(1)GQK(0.925)YGSK(0.075);EMSIHDGMK(1)GQK(0.999)YGSK(0.001);EMSIHDGMK(1)GQK(0.954)YGSK(0.046);EMSIHDGMK(1)GQK(0.992)YGSK(0.008);EMSIHDGMK(1)GQK(0.998)YGSK(0.002);EMSIHDGMK(1)GQK(0.922)YGSK(0.078)	EMSIHDGMK(-5.84)GQK(5.84)YGSK(-9.86);EMSIHDGMK(-37.17)GQK(14.44)YGSK(-14.44);EMSIHDGMK(68.6)GQK(13.35)YGSK(-13.35);EMSIHDGMK(71.46)GQK(12.31)YGSK(-12.31);EMSIHDGMK(80.01)GQK(10.93)YGSK(-10.93);EMSIHDGMK(75.65)GQK(30.73)YGSK(-30.73);EMSIHDGMK(59.35)GQK(13.19)YGSK(-13.19);EMSIHDGMK(134.51)GQK(20.9)YGSK(-20.9);EMSIHDGMK(154.38)GQK(26.98)YGSK(-26.98);EMSIHDGMK(133.39)GQK(10.7)YGSK(-10.7)			_EMSIHDGMKGQK(bi)YGSK_;_EMSIHDGM(ox)K(bi)GQK(bi)YGSK_;_EM(ox)SIHDGMK(bi)GQK(bi)YGSK_;_EMSIHDGMK(bi)GQK(bi)YGSK_
PF3D7_0730900	P. falciparum	EMP1-trafficking protein										22.014	23.3511	23.7389		22.3514	23.1766	2 Biotin (K)	0	2			43791000	9.91e-11	152.66	76.591	11	NaN	3	2630.22	23.903	EMSIHDGMKGQKYGSKNIR	222	1	216.34	216.336	+	NaN	NaN	NaN		1560	1578	_EMSIHDGMKGQK(bi)YGSK(bi)NIR_;_EMSIHDGMKGQK(bi)YGSK(bi)NIR_;_EMSIHDGMKGQK(bi)YGSK(bi)NIR_;_EMSIHDGMKGQK(bi)YGSK(bi)NIR_;_EMSIHDGMKGQK(bi)YGSK(bi)NIR_;_EMSIHDGMKGQK(bi)YGSK(bi)NIR_;_EMSIHDGMKGQK(bi)YGSK(bi)NIR_;_EMSIHDGMKGQK(bi)YGSK(bi)NIR_;_EM(ox)SIHDGM(ox)K(bi)GQK(bi)YGSK(bi)NIR_;_EM(ox)SIHDGM(ox)K(bi)GQK(bi)YGSK(bi)NIR_;_EM(ox)SIHDGM(ox)K(bi)GQK(bi)YGSK(bi)NIR_;_EM(ox)SIHDGM(ox)K(bi)GQK(bi)YGSK…	EMSIHDGMKGQK(1)YGSK(1)NIR;EMSIHDGMKGQK(1)YGSK(1)NIR;EMSIHDGMKGQK(1)YGSK(1)NIR;EMSIHDGMK(0.002)GQK(0.998)YGSK(1)NIR;EMSIHDGMKGQK(1)YGSK(1)NIR;EMSIHDGMK(0.001)GQK(0.999)YGSK(1)NIR;EMSIHDGMKGQK(1)YGSK(1)NIR;EMSIHDGMK(0.002)GQK(0.998)YGSK(1)NIR;EMSIHDGMK(1)GQK(1)YGSK(1)NIR;EMSIHDGMK(1)GQK(1)YGSK(1)NIR;EMSIHDGMK(1)GQK(1)YGSK(1)NIR;EMSIHDGMK(1)GQK(1)YGSK(1)NIR;EMSIHDGMK(1)GQK(1)YGSK(1)NIR;EMSIHDGMK(1)G…	EMSIHDGMK(-55.38)GQK(55.38)YGSK(103.11)NIR;EMSIHDGMK(-39.23)GQK(39.23)YGSK(72.1)NIR;EMSIHDGMK(-41.12)GQK(41.12)YGSK(74.79)NIR;EMSIHDGMK(-26.96)GQK(26.96)YGSK(62.63)NIR;EMSIHDGMK(-33.15)GQK(33.15)YGSK(79.06)NIR;EMSIHDGMK(-31.37)GQK(31.37)YGSK(65.15)NIR;EMSIHDGMK(-35)GQK(35)YGSK(100.28)NIR;EMSIHDGMK(-26.1)GQK(26.1)YGSK(61.95)NIR;EMSIHDGMK(133.94)GQK(133.94)YGSK(133.94)NIR;EMSIHDGMK(169.58)GQK(169.5…			_EMSIHDGMKGQK(bi)YGSK(bi)NIR_;_EM(ox)SIHDGM(ox)K(bi)GQK(bi)YGSK(bi)NIR_;_EM(ox)SIHDGMK(bi)GQK(bi)YGSK(bi)NIR_;_EMSIHDGM(ox)K(bi)GQK(bi)YGSK(bi)NIR_;_EMSIHDGMK(bi)GQK(bi)YGSK(bi)NIR_;_EM(ox)SIHDGMKGQK(bi)YGSK(bi)NIR_;_EMSIHDGM(ox)KGQK(bi)YGSK(bi)NIR_
PF3D7_0730900	P. falciparum	EMP1-trafficking protein				21.0266	19.6955		21.1115			22.0001	23.3778	23.3511	22.7794	22.2158	22.932	2 Biotin (K)	0	2			51104000	1.35e-05	116.6	71.606	16	NaN	3	2616.21	22.98	EMSIHDGMKGQKYGSKNVR	222	1	156.08	156.079	+	NaN	NaN	NaN		1176	1194	_EMSIHDGMKGQK(bi)YGSK(bi)NVR_;_EMSIHDGMKGQK(bi)YGSK(bi)NVR_;_EMSIHDGMKGQK(bi)YGSK(bi)NVR_;_EMSIHDGMKGQK(bi)YGSK(bi)NVR_;_EMSIHDGMKGQK(bi)YGSK(bi)NVR_;_EMSIHDGMKGQK(bi)YGSK(bi)NVR_;_EMSIHDGMKGQK(bi)YGSK(bi)NVR_;_EMSIHDGMKGQK(bi)YGSK(bi)NVR_;_EMSIHDGMKGQK(bi)YGSK(bi)NVR_;_EMSIHDGMKGQK(bi)YGSK(bi)NVR_;_EMSIHDGMKGQK(bi)YGSK(bi)NVR_;_EMSIHDGMK(bi)GQK(bi)YGSK(bi)NVR_;_EMSIHDGMK(bi)GQK(bi)YGSK(bi)NVR_;_…	EMSIHDGMK(0.005)GQK(0.995)YGSK(1)NVR;EMSIHDGMK(0.102)GQK(0.898)YGSK(1)NVR;EMSIHDGMKGQK(1)YGSK(1)NVR;EMSIHDGMK(0.005)GQK(0.995)YGSK(1)NVR;EMSIHDGMK(0.001)GQK(0.999)YGSK(1)NVR;EMSIHDGMKGQK(1)YGSK(1)NVR;EMSIHDGMKGQK(1)YGSK(1)NVR;EMSIHDGMK(0.006)GQK(0.994)YGSK(1)NVR;EMSIHDGMKGQK(1)YGSK(1)NVR;EMSIHDGMKGQK(1)YGSK(1)NVR;EMSIHDGMKGQK(1)YGSK(1)NVR;EMSIHDGMK(1)GQK(1)YGSK(1)NVR;EMSIHDGMK(1)GQK(1)YGSK(1)NVR;…	EMSIHDGMK(-22.85)GQK(22.85)YGSK(47.51)NVR;EMSIHDGMK(-9.43)GQK(9.43)YGSK(51.66)NVR;EMSIHDGMK(-34.58)GQK(34.58)YGSK(71.29)NVR;EMSIHDGMK(-22.81)GQK(22.81)YGSK(51.22)NVR;EMSIHDGMK(-32.11)GQK(32.11)YGSK(59.36)NVR;EMSIHDGMK(-47.54)GQK(47.54)YGSK(77.24)NVR;EMSIHDGMK(-34.94)GQK(34.94)YGSK(76.36)NVR;EMSIHDGMK(-22)GQK(22)YGSK(46.49)NVR;EMSIHDGMK(-42.47)GQK(42.47)YGSK(81.99)NVR;EMSIHDGMK(-41.06)GQK(41.06)YG…			_EMSIHDGMKGQK(bi)YGSK(bi)NVR_;_EMSIHDGMK(bi)GQK(bi)YGSK(bi)NVR_;_EM(ox)SIHDGM(ox)K(bi)GQK(bi)YGSK(bi)NVR_;_EM(ox)SIHDGMK(bi)GQK(bi)YGSK(bi)NVR_;_EMSIHDGM(ox)K(bi)GQK(bi)YGSK(bi)NVR_
PF3D7_0202400	P. falciparum	gamete antigen 27/25, putative					21.294		21.0868	21.6782								2 Biotin (K)	0	2			8154200	0.01908	77.137	28.921	2	3	2	2581.31	42.033	EQPYNNVPYILKKGLEPK	119	NaN	NaN	NaN		NaN	NaN	NaN		831	848	_EQPYNNVPYILK(bi)K(bi)GLEPK_;_EQPYNNVPYILK(bi)K(bi)GLEPK_;_EQPYNNVPYILK(bi)K(bi)GLEPK_	EQPYNNVPYILK(0.904)K(0.769)GLEPK(0.327);EQPYNNVPYILK(0.99)K(0.886)GLEPK(0.124)	EQPYNNVPYILK(8.44)K(4.64)GLEPK(-4.64);EQPYNNVPYILK(19.43)K(8.88)GLEPK(-8.88)			_EQPYNNVPYILK(bi)K(bi)GLEPK_
PF3D7_0730900	P. falciparum	EMP1-trafficking protein										24.7995	24.4105	24.1488	24.5869	24.7129	24.6486	2 Biotin (K)	0	2			149140000	4.37e-38	229.62	175.56	21	NaN	3	2961.35	32.091	ESYTTKSYVSEFKNNDDGGLKK	222	1	92.563	80.2743	+	NaN	NaN	NaN		630	651	_ESYTTK(bi)SYVSEFKNNDDGGLKK_;_ESYTTK(bi)SYVSEFKNNDDGGLKK_;_ESYTTK(bi)SYVSEFKNNDDGGLKK_;_ESYTTK(bi)SYVSEFKNNDDGGLKK_;_ESYTTK(bi)SYVSEFKNNDDGGLKK_;_ESYTTK(bi)SYVSEFKNNDDGGLKK_;_ESYTTK(bi)SYVSEFKNNDDGGLKK_;_ESYTTK(bi)SYVSEFKNNDDGGLKK_;_ESYTTK(bi)SYVSEFKNNDDGGLKK_;_ESYTTK(bi)SYVSEFKNNDDGGLKK_;_ESYTTK(bi)SYVSEFKNNDDGGLKK_;_ESYTTK(bi)SYVSEFKNNDDGGLKK_;_ESYTTK(bi)SYVSEFKNNDDGGLKK_;_ESYTTK(bi)SYVSEFKNNDD…	ESYTTK(1)SYVSEFKNNDDGGLKK;ESYTTK(1)SYVSEFKNNDDGGLKK;ESYTTK(1)SYVSEFKNNDDGGLKK;ESYTTK(1)SYVSEFKNNDDGGLKK;ESYTTK(1)SYVSEFKNNDDGGLKK;ESYTTK(1)SYVSEFKNNDDGGLKK;ESYTTK(1)SYVSEFKNNDDGGLKK;ESYTTK(1)SYVSEFKNNDDGGLKK;ESYTTK(1)SYVSEFKNNDDGGLKK;ESYTTK(1)SYVSEFKNNDDGGLKK;ESYTTK(1)SYVSEFKNNDDGGLKK;ESYTTK(1)SYVSEFKNNDDGGLKK;ESYTTK(1)SYVSEFKNNDDGGLKK;ESYTTK(1)SYVSEFKNNDDGGLKK;ESYTTK(1)SYVSEFKNNDDGGLKK;ESYTTK(1)…	ESYTTK(83.74)SYVSEFK(-83.74)NNDDGGLK(-86.3)K(-86.3);ESYTTK(40.64)SYVSEFK(-40.64)NNDDGGLK(-55.15)K(-60.41);ESYTTK(54.87)SYVSEFK(-56.51)NNDDGGLK(-54.87)K(-54.87);ESYTTK(61.03)SYVSEFK(-61.03)NNDDGGLK(-65.48)K(-65.48);ESYTTK(105.37)SYVSEFK(-105.37)NNDDGGLK(-113.75)K(-114.4);ESYTTK(58.61)SYVSEFK(-58.61)NNDDGGLK(-64.57)K(-64.57);ESYTTK(77.07)SYVSEFK(-77.07)NNDDGGLK(-93.02)K(-93.02);ESYTTK(63.07)SYVSEFK…			_ESYTTK(bi)SYVSEFKNNDDGGLKK_;_ESYTTK(bi)SYVSEFK(bi)NNDDGGLKK_
PF3D7_0730900	P. falciparum	EMP1-trafficking protein										22.6056		21.4946	22.1948	21.9217	21.7772	2 Biotin (K)	0	2			21705000	3.17e-06	122.35	89.843	4	3	2	2892.29	35.005	ESYTTKSYVSEFKSNSDGGINK	222	NaN	NaN	NaN		NaN	NaN	NaN		476	497	_ESYTTK(bi)SYVSEFK(bi)SNSDGGINK_;_ESYTTK(bi)SYVSEFK(bi)SNSDGGINK_;_ESYTTK(bi)SYVSEFK(bi)SNSDGGINK_;_ESYTTK(bi)SYVSEFK(bi)SNSDGGINK_;_ESYTTK(bi)SYVSEFK(bi)SNSDGGINK_	ESYTTK(1)SYVSEFK(1)SNSDGGINK;ESYTTK(1)SYVSEFK(1)SNSDGGINK;ESYTTK(1)SYVSEFK(1)SNSDGGINK;ESYTTK(1)SYVSEFK(1)SNSDGGINK	ESYTTK(68.81)SYVSEFK(44.96)SNSDGGINK(-44.96);ESYTTK(96.4)SYVSEFK(69.36)SNSDGGINK(-69.36);ESYTTK(74.08)SYVSEFK(48.36)SNSDGGINK(-48.36);ESYTTK(62.45)SYVSEFK(34.46)SNSDGGINK(-34.46)			_ESYTTK(bi)SYVSEFK(bi)SNSDGGINK_
PF3D7_0730900	P. falciparum	EMP1-trafficking protein										22.4007	22.1424	21.879	22.0941	21.8816	22.5218	2 Biotin (K)	0	2			28386000	8.42e-06	114.62	76.035	15	3	3	3623.68	34.949	ESYTTKSYVSEFKSNSDGGINKEIYTPK	222	NaN	NaN	NaN		NaN	NaN	NaN		476	503	_ESYTTK(bi)SYVSEFK(bi)SNSDGGINKEIYTPK_;_ESYTTK(bi)SYVSEFK(bi)SNSDGGINKEIYTPK_;_ESYTTK(bi)SYVSEFK(bi)SNSDGGINKEIYTPK_;_ESYTTK(bi)SYVSEFK(bi)SNSDGGINKEIYTPK_;_ESYTTK(bi)SYVSEFK(bi)SNSDGGINKEIYTPK_;_ESYTTK(bi)SYVSEFK(bi)SNSDGGINKEIYTPK_	ESYTTK(1)SYVSEFK(1)SNSDGGINKEIYTPK;ESYTTK(1)SYVSEFK(0.992)SNSDGGINK(0.008)EIYTPK;ESYTTK(1)SYVSEFK(0.999)SNSDGGINK(0.001)EIYTPK;ESYTTK(1)SYVSEFK(1)SNSDGGINKEIYTPK;ESYTTK(1)SYVSEFK(1)SNSDGGINKEIYTPK;ESYTTK(1)SYVSEFK(0.969)SNSDGGINK(0.03)EIYTPK	ESYTTK(79.12)SYVSEFK(40.42)SNSDGGINK(-40.42)EIYTPK(-66.71);ESYTTK(72.27)SYVSEFK(20.68)SNSDGGINK(-20.68)EIYTPK(-50.79);ESYTTK(68.22)SYVSEFK(29.25)SNSDGGINK(-29.25)EIYTPK(-59.04);ESYTTK(73.34)SYVSEFK(39.37)SNSDGGINK(-39.37)EIYTPK(-63.72);ESYTTK(62.48)SYVSEFK(40.43)SNSDGGINK(-40.43)EIYTPK(-67);ESYTTK(58.89)SYVSEFK(15.03)SNSDGGINK(-15.03)EIYTPK(-41.34)			_ESYTTK(bi)SYVSEFK(bi)SNSDGGINKEIYTPK_
PF3D7_0730900	P. falciparum	EMP1-trafficking protein										23.6431	24.3443	23.6431	23.9134	23.654	24.1719	2 Biotin (K)	0	2			95329000	0.00037977	90.755	60.713	8	NaN	3	2878.34	17.521	FGDNREKTLGKHEHHEDHLK	222	1	90.755	82.3389	+	NaN	NaN	NaN		1899	1918	_FGDNREK(bi)TLGKHEHHEDHLK_;_FGDNREK(bi)TLGKHEHHEDHLK_;_FGDNREK(bi)TLGKHEHHEDHLK_;_FGDNREK(bi)TLGKHEHHEDHLK_;_FGDNREK(bi)TLGKHEHHEDHLK_;_FGDNREK(bi)TLGKHEHHEDHLK_;_FGDNREK(bi)TLGKHEHHEDHLK_;_FGDNREK(bi)TLGKHEHHEDHLK_;_FGDNREK(bi)TLGKHEHHEDHLK_;_FGDNREK(bi)TLGKHEHHEDHLK_;_FGDNREK(bi)TLGKHEHHEDHLK_;_FGDNREK(bi)TLGKHEHHEDHLK_;_FGDNREK(bi)TLGK(bi)HEHHEDHLK_;_FGDNREK(bi)TLGK(bi)HEHHEDHLK_;_FGDNREK(bi)T…	FGDNREK(1)TLGKHEHHEDHLK;FGDNREK(1)TLGKHEHHEDHLK;FGDNREK(1)TLGKHEHHEDHLK;FGDNREK(1)TLGKHEHHEDHLK;FGDNREK(0.999)TLGK(0.001)HEHHEDHLK;FGDNREK(0.997)TLGK(0.003)HEHHEDHLK;FGDNREK(0.999)TLGK(0.001)HEHHEDHLK;FGDNREK(1)TLGKHEHHEDHLK;FGDNREK(0.937)TLGK(0.063)HEHHEDHLK;FGDNREK(0.996)TLGK(0.004)HEHHEDHLK;FGDNREK(0.997)TLGK(0.003)HEHHEDHLK;FGDNREK(0.997)TLGK(0.003)HEHHEDHLK;FGDNREK(1)TLGK(1)HEHHEDHLK;FGDNREK…	FGDNREK(38.2)TLGK(-38.2)HEHHEDHLK(-103.15);FGDNREK(34.41)TLGK(-34.41)HEHHEDHLK(-48.7);FGDNREK(52.03)TLGK(-52.03)HEHHEDHLK(-133.15);FGDNREK(45.65)TLGK(-45.65)HEHHEDHLK(-60.18);FGDNREK(28.89)TLGK(-28.89)HEHHEDHLK(-95.75);FGDNREK(25.47)TLGK(-25.47)HEHHEDHLK(-55.09);FGDNREK(29.74)TLGK(-29.74)HEHHEDHLK(-60.22);FGDNREK(47.61)TLGK(-47.61)HEHHEDHLK(-129.14);FGDNREK(11.72)TLGK(-11.72)HEHHEDHLK(-49.73);FGD…			_FGDNREK(bi)TLGKHEHHEDHLK_;_FGDNREK(bi)TLGK(bi)HEHHEDHLK_
PF3D7_0730900	P. falciparum	EMP1-trafficking protein										24.2607	25.3376	24.1332	24.8576	24.1332	24.6595	2 Biotin (K)	0	2			156210000	0.0002591	93.371	64.622	15	NaN	3	2904.34	19.261	FGDNREKTLGKHEHHEEYVK	222	1	97.621	95.3089	+	NaN	NaN	NaN		1943	1962	_FGDNREK(bi)TLGKHEHHEEYVK_;_FGDNREK(bi)TLGKHEHHEEYVK_;_FGDNREK(bi)TLGKHEHHEEYVK_;_FGDNREK(bi)TLGKHEHHEEYVK_;_FGDNREK(bi)TLGKHEHHEEYVK_;_FGDNREK(bi)TLGKHEHHEEYVK_;_FGDNREK(bi)TLGKHEHHEEYVK_;_FGDNREK(bi)TLGKHEHHEEYVK_;_FGDNREK(bi)TLGKHEHHEEYVK_;_FGDNREK(bi)TLGKHEHHEEYVK_;_FGDNREK(bi)TLGKHEHHEEYVK_;_FGDNREK(bi)TLGKHEHHEEYVK_;_FGDNREK(bi)TLGKHEHHEEYVK_;_FGDNREK(bi)TLGKHEHHEEYVK_;_FGDNREK(bi)TLGKHEHHE…	FGDNREK(0.895)TLGK(0.105)HEHHEEYVK;FGDNREK(0.993)TLGK(0.007)HEHHEEYVK;FGDNREK(0.99)TLGK(0.01)HEHHEEYVK;FGDNREK(0.988)TLGK(0.012)HEHHEEYVK;FGDNREK(0.989)TLGK(0.011)HEHHEEYVK;FGDNREK(0.988)TLGK(0.012)HEHHEEYVK;FGDNREK(1)TLGKHEHHEEYVK;FGDNREK(0.999)TLGK(0.001)HEHHEEYVK;FGDNREK(0.999)TLGK(0.001)HEHHEEYVK;FGDNREK(0.997)TLGK(0.003)HEHHEEYVK;FGDNREK(0.985)TLGK(0.015)HEHHEEYVK;FGDNREK(0.988)TLGK(0.012)HE…	FGDNREK(9.31)TLGK(-9.31)HEHHEEYVK(-44.37);FGDNREK(21.61)TLGK(-21.61)HEHHEEYVK(-61.36);FGDNREK(20.13)TLGK(-20.13)HEHHEEYVK(-89.87);FGDNREK(19.27)TLGK(-19.27)HEHHEEYVK(-67.4);FGDNREK(19.53)TLGK(-19.53)HEHHEEYVK(-59.7);FGDNREK(19.15)TLGK(-19.15)HEHHEEYVK(-58.63);FGDNREK(36.15)TLGK(-36.15)HEHHEEYVK(-105.38);FGDNREK(32.14)TLGK(-32.14)HEHHEEYVK(-82.15);FGDNREK(31.5)TLGK(-31.5)HEHHEEYVK(-76.67);FGDNREK(…			_FGDNREK(bi)TLGKHEHHEEYVK_;_FGDNREK(bi)TLGK(bi)HEHHEEYVK_
PF3D7_0730900	P. falciparum	EMP1-trafficking protein										23.2961	24.1488	23.3778	23.8481	23.3376	23.7389	2 Biotin (K)	0	2			79427000	0.00014305	153.39	106.59	18	NaN	3	1980.97	21.138	FGDNREKTLGKHK	222	1	131.08	89.2577	+	NaN	NaN	NaN		2075	2087	_FGDNREK(bi)TLGK(bi)HK_;_FGDNREK(bi)TLGK(bi)HK_;_FGDNREK(bi)TLGK(bi)HK_;_FGDNREK(bi)TLGK(bi)HK_;_FGDNREK(bi)TLGK(bi)HK_;_FGDNREK(bi)TLGK(bi)HK_;_FGDNREK(bi)TLGK(bi)HK_;_FGDNREK(bi)TLGK(bi)HK_;_FGDNREK(bi)TLGK(bi)HK_;_FGDNREK(bi)TLGK(bi)HK_;_FGDNREK(bi)TLGK(bi)HK_;_FGDNREK(bi)TLGK(bi)HK_;_FGDNREK(bi)TLGK(bi)HK_	FGDNREK(1)TLGK(0.821)HK(0.179);FGDNREK(0.999)TLGK(0.552)HK(0.449);FGDNREK(1)TLGK(0.912)HK(0.088);FGDNREK(1)TLGK(0.84)HK(0.16);FGDNREK(1)TLGK(0.947)HK(0.053);FGDNREK(1)TLGK(0.997)HK(0.003);FGDNREK(1)TLGK(0.981)HK(0.019);FGDNREK(1)TLGK(0.877)HK(0.123);FGDNREK(1)TLGK(0.857)HK(0.144);FGDNREK(1)TLGK(0.963)HK(0.037)	FGDNREK(57.41)TLGK(6.61)HK(-6.61);FGDNREK(27.35)TLGK(0.91)HK(-0.91);FGDNREK(65.43)TLGK(10.15)HK(-10.15);FGDNREK(38.2)TLGK(7.2)HK(-7.2);FGDNREK(78.15)TLGK(12.49)HK(-12.49);FGDNREK(54.02)TLGK(25.95)HK(-25.95);FGDNREK(103.3)TLGK(17.15)HK(-17.15);FGDNREK(76.44)TLGK(8.54)HK(-8.54);FGDNREK(39.02)TLGK(7.76)HK(-7.76);FGDNREK(89.26)TLGK(14.18)HK(-14.18)			_FGDNREK(bi)TLGK(bi)HK_
PF3D7_0730900	P. falciparum	EMP1-trafficking protein										25.1293	25.391	24.7077	24.2607	24.8623		2 Biotin (K)	0	2			158720000	6.11e-09	212.68	143.89	15	2	2	1727.87	30.756	FVDNKEKVLGK	222	NaN	NaN	NaN		NaN	NaN	NaN		1855	1865	_FVDNKEK(bi)VLGK_;_FVDNKEK(bi)VLGK_;_FVDNKEK(bi)VLGK_;_FVDNKEK(bi)VLGK_;_FVDNKEK(bi)VLGK_;_FVDNKEK(bi)VLGK_;_FVDNKEK(bi)VLGK_;_FVDNKEK(bi)VLGK_;_FVDNKEK(bi)VLGK_;_FVDNKEK(bi)VLGK_;_FVDNKEK(bi)VLGK_;_FVDNKEK(bi)VLGK_;_FVDNKEK(bi)VLGK_;_FVDNKEK(bi)VLGK_;_FVDNKEK(bi)VLGK_;_FVDNKEK(bi)VLGK_;_FVDNKEK(bi)VLGK_;_FVDNKEK(bi)VLGK_;_FVDNKEK(bi)VLGK_;_FVDNKEK(bi)VLGK_;_FVDNKEK(bi)VLGK_;_FVDNKEK(bi)VLGK_;_FV…	FVDNK(0.026)EK(0.973)VLGK;FVDNK(0.023)EK(0.976)VLGK(0.001);FVDNK(0.002)EK(0.998)VLGK;FVDNK(0.023)EK(0.976)VLGK;FVDNK(0.039)EK(0.961)VLGK;FVDNK(0.024)EK(0.976)VLGK;FVDNK(0.015)EK(0.985)VLGK;FVDNK(0.024)EK(0.976)VLGK;FVDNK(0.001)EK(0.999)VLGK;FVDNK(0.006)EK(0.994)VLGK;FVDNKEK(1)VLGK;FVDNK(0.001)EK(0.999)VLGK;FVDNK(0.002)EK(0.997)VLGK;FVDNK(0.001)EK(0.999)VLGK;FVDNK(0.019)EK(0.981)VLGK;FVDNKEK(1)VLG…	FVDNK(-15.66)EK(15.66)VLGK(-42.67);FVDNK(-16.28)EK(16.28)VLGK(-31.81);FVDNK(-26.38)EK(26.38)VLGK(-66.56);FVDNK(-16.25)EK(16.25)VLGK(-34.09);FVDNK(-13.97)EK(13.97)VLGK(-66.45);FVDNK(-16.13)EK(16.13)VLGK(-50.16);FVDNK(-18.12)EK(18.12)VLGK(-96.75);FVDNK(-16.07)EK(16.07)VLGK(-82.49);FVDNK(-30.1)EK(30.1)VLGK(-37.68);FVDNK(-22.2)EK(22.2)VLGK(-42.17);FVDNK(-34.9)EK(34.9)VLGK(-68.47);FVDNK(-29.87)EK(29.8…			_FVDNKEK(bi)VLGK_;_FVDNK(bi)EK(bi)VLGK_
PF3D7_0730900	P. falciparum	EMP1-trafficking protein										26.341	26.4999	26.2058	26.4154	25.8927	25.9847	2 Biotin (K)	0	2			475500000	1.63e-31	208.52	175.27	48	NaN	3	2867.38	20.956	FVDNKEKVLGKNEHHEDHLK	222	1	106.31	92.0348	+	NaN	NaN	NaN		1855	1874	_FVDNKEK(bi)VLGKNEHHEDHLK_;_FVDNK(bi)EKVLGKNEHHEDHLK_;_FVDNKEK(bi)VLGKNEHHEDHLK_;_FVDNK(bi)EKVLGKNEHHEDHLK_;_FVDNKEK(bi)VLGKNEHHEDHLK_;_FVDNKEK(bi)VLGKNEHHEDHLK_;_FVDNKEK(bi)VLGKNEHHEDHLK_;_FVDNKEK(bi)VLGKNEHHEDHLK_;_FVDNK(bi)EKVLGKNEHHEDHLK_;_FVDNKEK(bi)VLGKNEHHEDHLK_;_FVDNKEK(bi)VLGKNEHHEDHLK_;_FVDNKEK(bi)VLGKNEHHEDHLK_;_FVDNKEK(bi)VLGKNEHHEDHLK_;_FVDNKEK(bi)VLGKNEHHEDHLK_;_FVDNK(bi)EKVLGKNEHHE…	FVDNK(0.025)EK(0.975)VLGKNEHHEDHLK;FVDNK(0.496)EK(0.496)VLGK(0.007)NEHHEDHLK;FVDNK(0.021)EK(0.979)VLGK(0.001)NEHHEDHLK;FVDNK(0.496)EK(0.496)VLGK(0.008)NEHHEDHLK(0.001);FVDNK(0.325)EK(0.673)VLGK(0.002)NEHHEDHLK;FVDNK(0.171)EK(0.828)VLGK(0.001)NEHHEDHLK;FVDNK(0.032)EK(0.968)VLGKNEHHEDHLK;FVDNK(0.001)EK(0.999)VLGKNEHHEDHLK;FVDNK(0.496)EK(0.496)VLGK(0.008)NEHHEDHLK;FVDNK(0.348)EK(0.611)VLGK(0.041)NEH…	FVDNK(-15.92)EK(15.92)VLGK(-46.31)NEHHEDHLK(-97.92);FVDNK(0)EK(0)VLGK(-18.31)NEHHEDHLK(-60.01);FVDNK(-16.78)EK(16.78)VLGK(-30.68)NEHHEDHLK(-92.2);FVDNK(0)EK(0)VLGK(-17.77)NEHHEDHLK(-29.09);FVDNK(-3.16)EK(3.16)VLGK(-26.5)NEHHEDHLK(-53.36);FVDNK(-6.86)EK(6.86)VLGK(-29.32)NEHHEDHLK(-74.61);FVDNK(-14.84)EK(14.84)VLGK(-47.32)NEHHEDHLK(-81.2);FVDNK(-29.39)EK(29.39)VLGK(-41.93)NEHHEDHLK(-131.97);FVDNK(0…			_FVDNKEK(bi)VLGKNEHHEDHLK_;_FVDNK(bi)EKVLGKNEHHEDHLK_;_FVDNKEK(bi)VLGK(bi)NEHHEDHLK_;_FVDNK(bi)EKVLGK(bi)NEHHEDHLK_;_FVDNK(bi)EK(bi)VLGKNEHHEDHLK_;_FVDNK(bi)EK(bi)VLGK(bi)NEHHEDHLK_;_FVDNK(bi)EK(bi)VLGKNEHHEDHLK(bi)_
PF3D7_0730900	P. falciparum	EMP1-trafficking protein										23.7492						2 Biotin (K)	0	2			14107000	0.025547	47.616	8.1156	2	NaN	2	3612.69	28.777	FVQEFKSNTHDGMNNKVNTTNNAPNVIK	222	NaN	NaN	NaN		NaN	NaN	NaN		306	333	_FVQEFK(bi)SNTHDGMNNKVNTTNNAPNVIK_;_FVQEFK(bi)SNTHDGMNNKVNTTNNAPNVIK_;_FVQEFK(bi)SNTHDGMNNKVNTTNNAPNVIK_;_FVQEFK(bi)SNTHDGMNNKVNTTNNAPNVIK_;_FVQEFK(bi)SNTHDGMNNKVNTTNNAPNVIK_;_FVQEFK(bi)SNTHDGMNNKVNTTNNAPNVIK_;_FVQEFK(bi)SNTHDGMNNKVNTTNNAPNVIK_;_FVQEFK(bi)SNTHDGMNNKVNTTNNAPNVIK_;_FVQEFK(bi)SNTHDGMNNKVNTTNNAPNVIK_;_FVQEFK(bi)SNTHDGMNNKVNTTNNAPNVIK_;_FVQEFK(bi)SNTHDGMNNKVNTTNNAPNVIK_;_FVQEFK(bi)SNT…	FVQEFK(0.985)SNTHDGMNNK(0.015)VNTTNNAPNVIK;FVQEFK(1)SNTHDGMNNKVNTTNNAPNVIK;FVQEFK(1)SNTHDGMNNKVNTTNNAPNVIK;FVQEFK(0.999)SNTHDGMNNK(0.001)VNTTNNAPNVIK;FVQEFK(0.996)SNTHDGMNNK(0.004)VNTTNNAPNVIK;FVQEFK(0.971)SNTHDGMNNK(0.029)VNTTNNAPNVIK;FVQEFK(1)SNTHDGMNNKVNTTNNAPNVIK;FVQEFK(0.998)SNTHDGMNNK(0.002)VNTTNNAPNVIK;FVQEFK(0.999)SNTHDGMNNK(0.001)VNTTNNAPNVIK;FVQEFK(1)SNTHDGMNNKVNTTNNAPNVIK;FVQEFK(1)SNTH…	FVQEFK(18.05)SNTHDGMNNK(-18.05)VNTTNNAPNVIK(-53.32);FVQEFK(42.88)SNTHDGMNNK(-42.88)VNTTNNAPNVIK(-68.04);FVQEFK(45.79)SNTHDGMNNK(-45.79)VNTTNNAPNVIK(-59.27);FVQEFK(30.31)SNTHDGMNNK(-30.31)VNTTNNAPNVIK(-55.55);FVQEFK(23.99)SNTHDGMNNK(-23.99)VNTTNNAPNVIK(-48.15);FVQEFK(15.26)SNTHDGMNNK(-15.26)VNTTNNAPNVIK(-50.58);FVQEFK(52.26)SNTHDGMNNK(-52.26)VNTTNNAPNVIK(-83.04);FVQEFK(27.15)SNTHDGMNNK(-27.15)VNTT…			_FVQEFK(bi)SNTHDGMNNKVNTTNNAPNVIK_;_FVQEFK(bi)SNTHDGM(ox)NNKVNTTNNAPNVIK_;_FVQEFK(bi)SNTHDGMNNK(bi)VNTTNNAPNVIK_
PF3D7_0730900	P. falciparum	EMP1-trafficking protein				21.3839	21.9699		22.2832	21.3736	21.5676	26.6865	26.8385	26.512	26.6595	26.5389	26.6458	2 Biotin (K)	0	2			650260000	4.48e-37	227.09	169.29	46	NaN	2	2988.36	33.622	FVSELKSNTYSYMNKNPYSHK	222	NaN	NaN	NaN		NaN	NaN	NaN		989	1009	_FVSELK(bi)SNTYSYM(ox)NKNPYSHK_;_FVSELK(bi)SNTYSYM(ox)NKNPYSHK_;_FVSELK(bi)SNTYSYM(ox)NKNPYSHK_;_FVSELK(bi)SNTYSYM(ox)NKNPYSHK_;_FVSELK(bi)SNTYSYM(ox)NKNPYSHK_;_FVSELK(bi)SNTYSYM(ox)NKNPYSHK_;_FVSELK(bi)SNTYSYM(ox)NKNPYSHK_;_FVSELK(bi)SNTYSYM(ox)NKNPYSHK_;_FVSELK(bi)SNTYSYM(ox)NKNPYSHK_;_FVSELK(bi)SNTYSYM(ox)NKNPYSHK_;_FVSELK(bi)SNTYSYM(ox)NKNPYSHK_;_FVSELK(bi)SNTYSYM(ox)NKNPYSHK_;_FVSELK(bi)SNTY…	FVSELK(1)SNTYSYMNKNPYSHK;FVSELK(1)SNTYSYMNKNPYSHK;FVSELK(1)SNTYSYMNKNPYSHK;FVSELK(0.97)SNTYSYMNK(0.027)NPYSHK(0.003);FVSELK(1)SNTYSYMNKNPYSHK;FVSELK(1)SNTYSYMNKNPYSHK;FVSELK(1)SNTYSYMNKNPYSHK;FVSELK(1)SNTYSYMNKNPYSHK;FVSELK(1)SNTYSYMNKNPYSHK;FVSELK(1)SNTYSYMNKNPYSHK;FVSELK(1)SNTYSYMNKNPYSHK;FVSELK(1)SNTYSYMNKNPYSHK;FVSELK(0.999)SNTYSYMNK(0.001)NPYSHK;FVSELK(1)SNTYSYMNKNPYSHK;FVSELK(1)SNTYSYMNKNPY…	FVSELK(67.53)SNTYSYMNK(-67.53)NPYSHK(-76.3);FVSELK(55.6)SNTYSYMNK(-55.6)NPYSHK(-61.37);FVSELK(61.77)SNTYSYMNK(-61.77)NPYSHK(-68.87);FVSELK(15.52)SNTYSYMNK(-15.52)NPYSHK(-25.12);FVSELK(84.61)SNTYSYMNK(-84.61)NPYSHK(-93.87);FVSELK(56.26)SNTYSYMNK(-56.26)NPYSHK(-62.7);FVSELK(53.76)SNTYSYMNK(-53.76)NPYSHK(-61.97);FVSELK(43.17)SNTYSYMNK(-43.17)NPYSHK(-58.31);FVSELK(61.16)SNTYSYMNK(-61.16)NPYSHK(-76.59…			_FVSELK(bi)SNTYSYM(ox)NKNPYSHK_;_FVSELK(bi)SNTYSYMNKNPYSHK_;_FVSELK(bi)SNTYSYMNK(bi)NPYSHK_;_FVSELK(bi)SNTYSYM(ox)NK(bi)NPYSHK_
PF3D7_0730900	P. falciparum	EMP1-trafficking protein				23.8858	23.7492	22.2067	24.2021	24.0105	23.4298	27.3494	27.509	26.965	27.17	26.965	27.2891	2 Biotin (K)	0	2			1021100000	4.76e-19	168.99	136.24	53	NaN	3	3116.46	30.981	FVSELKSNTYSYMNKNPYSHKK	222	0.8063	61.087	6.23054	+	NaN	NaN	NaN		989	1010	_FVSELK(bi)SNTYSYM(ox)NKNPYSHKK_;_FVSELK(bi)SNTYSYM(ox)NKNPYSHKK_;_FVSELK(bi)SNTYSYM(ox)NKNPYSHKK_;_FVSELK(bi)SNTYSYM(ox)NKNPYSHKK_;_FVSELK(bi)SNTYSYM(ox)NKNPYSHKK_;_FVSELK(bi)SNTYSYM(ox)NKNPYSHKK_;_FVSELK(bi)SNTYSYM(ox)NKNPYSHKK_;_FVSELK(bi)SNTYSYM(ox)NKNPYSHKK_;_FVSELK(bi)SNTYSYM(ox)NKNPYSHKK_;_FVSELK(bi)SNTYSYM(ox)NKNPYSHKK_;_FVSELK(bi)SNTYSYM(ox)NKNPYSHKK_;_FVSELK(bi)SNTYSYM(ox)NKNPYSHKK_;_FV…	FVSELK(1)SNTYSYMNKNPYSHKK;FVSELK(0.999)SNTYSYMNK(0.001)NPYSHKK;FVSELK(1)SNTYSYMNKNPYSHKK;FVSELK(0.999)SNTYSYMNKNPYSHKK;FVSELK(1)SNTYSYMNKNPYSHKK;FVSELK(1)SNTYSYMNKNPYSHKK;FVSELK(1)SNTYSYMNKNPYSHKK;FVSELK(1)SNTYSYMNKNPYSHKK;FVSELK(1)SNTYSYMNKNPYSHKK;FVSELK(0.997)SNTYSYMNK(0.003)NPYSHKK;FVSELK(1)SNTYSYMNKNPYSHKK;FVSELK(1)SNTYSYMNKNPYSHKK;FVSELK(1)SNTYSYMNKNPYSHKK;FVSELK(0.916)SNTYSYMNK(0.082)NPYSHK…	FVSELK(81.23)SNTYSYMNK(-81.23)NPYSHK(-84.94)K(-84.94);FVSELK(32.93)SNTYSYMNK(-32.93)NPYSHK(-42.25)K(-42.25);FVSELK(57.52)SNTYSYMNK(-57.52)NPYSHK(-64.5)K(-64.5);FVSELK(36.04)SNTYSYMNK(-40.91)NPYSHK(-36.04)K(-36.04);FVSELK(52.88)SNTYSYMNK(-52.88)NPYSHK(-56.57)K(-56.57);FVSELK(34.16)SNTYSYMNK(-34.16)NPYSHK(-51.43)K(-44.69);FVSELK(42.5)SNTYSYMNK(-42.5)NPYSHK(-46.25)K(-46.77);FVSELK(35.15)SNTYSYMNK(-3…			_FVSELK(bi)SNTYSYM(ox)NKNPYSHKK_;_FVSELK(bi)SNTYSYMNKNPYSHKK_;_FVSELKSNTYSYMNK(bi)NPYSHKK_;_FVSELK(bi)SNTYSYMNK(bi)NPYSHKK_;_FVSELK(bi)SNTYSYMNKNPYSHK(bi)K_;_FVSELK(bi)SNTYSYMNKNPYSHKK(bi)_;_FVSELK(bi)SNTYSYM(ox)NK(bi)NPYSHKK_
PF3D7_0202000	P. falciparum	knob-associated histidine-rich protein				25.002	24.7895	24.9495	25.5165	25.5404	24.9847							2 Biotin (K)	0	2			224950000	2.42e-09	87.12	57.706	24	NaN	2	4320.93	26.586	GASTTAGSTTGATTGANAVQSKDETADKNAANNGEQVMSR	117	1	62.434	62.4336	+	0.720288	103.289	5.87047		596	635	_GASTTAGSTTGATTGANAVQSKDETADK(bi)NAANNGEQVM(ox)SR_;_GASTTAGSTTGATTGANAVQSK(bi)DETADKNAANNGEQVM(ox)SR_;_GASTTAGSTTGATTGANAVQSK(bi)DETADKNAANNGEQVM(ox)SR_;_GASTTAGSTTGATTGANAVQSK(bi)DETADKNAANNGEQVM(ox)SR_;_GASTTAGSTTGATTGANAVQSK(bi)DETADKNAANNGEQVM(ox)SR_;_GASTTAGSTTGATTGANAVQSK(bi)DETADKNAANNGEQVM(ox)SR_;_GASTTAGSTTGATTGANAVQSK(bi)DETADKNAANNGEQVM(ox)SR_;_GASTTAGSTTGATTGANAVQSK(bi)DETADKNAANNGEQV…	GASTTAGSTTGATTGANAVQSK(0.111)DETADK(0.889)NAANNGEQVMSR;GASTTAGSTTGATTGANAVQSK(0.995)DETADK(0.005)NAANNGEQVMSR;GASTTAGSTTGATTGANAVQSK(0.763)DETADK(0.237)NAANNGEQVMSR;GASTTAGSTTGATTGANAVQSK(0.992)DETADK(0.008)NAANNGEQVMSR;GASTTAGSTTGATTGANAVQSK(0.5)DETADK(0.5)NAANNGEQVMSR;GASTTAGSTTGATTGANAVQSK(0.73)DETADK(0.27)NAANNGEQVMSR;GASTTAGSTTGATTGANAVQSK(0.517)DETADK(0.483)NAANNGEQVMSR;GASTTAGSTTGATTGANAVQ…	GASTTAGSTTGATTGANAVQSK(-9.02)DETADK(9.02)NAANNGEQVMSR;GASTTAGSTTGATTGANAVQSK(23.26)DETADK(-23.26)NAANNGEQVMSR;GASTTAGSTTGATTGANAVQSK(5.08)DETADK(-5.08)NAANNGEQVMSR;GASTTAGSTTGATTGANAVQSK(21.03)DETADK(-21.03)NAANNGEQVMSR;GASTTAGSTTGATTGANAVQSK(0)DETADK(0)NAANNGEQVMSR;GASTTAGSTTGATTGANAVQSK(4.31)DETADK(-4.31)NAANNGEQVMSR;GASTTAGSTTGATTGANAVQSK(0.3)DETADK(-0.3)NAANNGEQVMSR;GASTTAGSTTGATTGANAVQSK(10.…	GAS(0.419)T(0.419)T(0.156)AGS(0.001)T(0.001)T(0.001)GAT(0.001)T(0.001)GANAVQS(0.001)KDETADKNAANNGEQVMSR;GAS(0.429)T(0.429)T(0.132)AGS(0.006)T(0.002)T(0.002)GAT(0.002)TGANAVQSKDETADKNAANNGEQVMSR;GAS(0.06)T(0.136)T(0.042)AGS(0.236)T(0.181)T(0.069)GAT(0.075)T(0.03)GANAVQS(0.077)KDET(0.095)ADKNAANNGEQVMSR;GAS(0.474)T(0.427)T(0.085)AGS(0.003)T(0.003)T(0.002)GAT(0.001)T(0.001)GANAVQS(0.002)KDET(0.002)A…	GAS(0)T(0)T(-4.32)AGS(-25.48)T(-25.48)T(-27.53)GAT(-27.95)T(-27.95)GANAVQS(-27.27)KDET(-31.32)ADKNAANNGEQVMS(-60.74)R;GAS(0)T(0)T(-5.15)AGS(-18.85)T(-23.87)T(-23.87)GAT(-24.25)T(-34.39)GANAVQS(-43.59)KDET(-43.03)ADKNAANNGEQVMS(-69.5)R;GAS(-6.17)T(-2.54)T(-7.59)AGS(1.13)T(-1.13)T(-5.38)GAT(-4.99)T(-9.07)GANAVQS(-4.99)KDET(-4.99)ADKNAANNGEQVMS(-36.21)R;GAS(0.46)T(-0.46)T(-7.51)AGS(-21.41)T(-21.41)T…	_GASTTAGSTTGATTGANAVQSKDETADK(bi)NAANNGEQVM(ox)SR_;_GASTTAGSTTGATTGANAVQSK(bi)DETADKNAANNGEQVM(ox)SR_;_GAS(ph)TTAGSTTGATTGANAVQSKDETADK(bi)NAANNGEQVM(ox)SR_;_GASTTAGS(ph)TTGATTGANAVQSKDETADK(bi)NAANNGEQVM(ox)SR_;_GASTTAGSTTGATTGANAVQS(ph)KDETADK(bi)NAANNGEQVM(ox)SR_;_GAST(ph)TAGSTTGATTGANAVQSKDETADK(bi)NAANNGEQVM(ox)SR_;_GASTT(ph)AGSTTGATTGANAVQSKDETADK(bi)NAANNGEQVM(ox)SR_;_GASTTAGSTTGATTGANAVQS…
PF3D7_0401800	P. falciparum	Plasmodium exported protein (PHISTb), unknown function				27.141	27.1795	25.9066	27.524	27.217	27.1604							2 Biotin (K)	0	2			860280000	3.29e-60	232.81	151.12	13	NaN	2	3510.54	42.539	GFGCDCKDAANYILKNLDLYDEHEAK	145	NaN	NaN	NaN		NaN	NaN	NaN		341	366	_GFGCDCK(bi)DAANYILK(bi)NLDLYDEHEAK_;_GFGCDCK(bi)DAANYILK(bi)NLDLYDEHEAK_;_GFGCDCK(bi)DAANYILK(bi)NLDLYDEHEAK_;_GFGCDCK(bi)DAANYILK(bi)NLDLYDEHEAK_;_GFGCDCK(bi)DAANYILK(bi)NLDLYDEHEAK_;_GFGCDCK(bi)DAANYILK(bi)NLDLYDEHEAK_;_GFGCDCK(bi)DAANYILK(bi)NLDLYDEHEAK_;_GFGCDCK(bi)DAANYILK(bi)NLDLYDEHEAK_;_GFGCDCK(bi)DAANYILK(bi)NLDLYDEHEAK_;_GFGCDCK(bi)DAANYILK(bi)NLDLYDEHEAK_;_GFGCDCK(bi)DAANYILK(bi)NLDLY…	GFGCDCK(1)DAANYILK(1)NLDLYDEHEAK;GFGCDCK(1)DAANYILK(1)NLDLYDEHEAK;GFGCDCK(1)DAANYILK(1)NLDLYDEHEAK;GFGCDCK(1)DAANYILK(1)NLDLYDEHEAK;GFGCDCK(1)DAANYILK(1)NLDLYDEHEAK;GFGCDCK(1)DAANYILK(1)NLDLYDEHEAK;GFGCDCK(1)DAANYILK(1)NLDLYDEHEAK;GFGCDCK(1)DAANYILK(1)NLDLYDEHEAK;GFGCDCK(1)DAANYILK(1)NLDLYDEHEAK;GFGCDCK(1)DAANYILK(1)NLDLYDEHEAK;GFGCDCK(1)DAANYILK(1)NLDLYDEHEAK;GFGCDCK(1)DAANYILK(1)NLDLYDEHEAK;GFG…	GFGCDCK(125.57)DAANYILK(49.53)NLDLYDEHEAK(-49.53);GFGCDCK(131.2)DAANYILK(66.87)NLDLYDEHEAK(-66.87);GFGCDCK(108.12)DAANYILK(57.58)NLDLYDEHEAK(-57.58);GFGCDCK(115.58)DAANYILK(56.36)NLDLYDEHEAK(-56.36);GFGCDCK(196.31)DAANYILK(94.72)NLDLYDEHEAK(-94.72);GFGCDCK(125.89)DAANYILK(77.68)NLDLYDEHEAK(-77.68);GFGCDCK(127.59)DAANYILK(79.87)NLDLYDEHEAK(-79.87);GFGCDCK(106.67)DAANYILK(58.85)NLDLYDEHEAK(-58.85);…			_GFGCDCK(bi)DAANYILK(bi)NLDLYDEHEAK_;_GFGCDCKDAANYILK(bi)NLDLYDEHEAK_
PF3D7_0401800	P. falciparum	Plasmodium exported protein (PHISTb), unknown function				27.9814	27.965	26.4692	28.4394	27.7645	27.6931	21.9291		22.3708	23.5285	23.4551	23.5285	2 Biotin (K)	0	2			1473900000	3.01e-39	188.08	146.05	39	NaN	3	3638.63	42.076	GFGCDCKDAANYILKNLDLYDEHEAKK	145	1	170.58	113.974	+	NaN	NaN	NaN		341	367	_GFGCDCKDAANYILK(bi)NLDLYDEHEAKK_;_GFGCDCKDAANYILK(bi)NLDLYDEHEAKK_;_GFGCDCKDAANYILK(bi)NLDLYDEHEAKK_;_GFGCDCKDAANYILK(bi)NLDLYDEHEAKK_;_GFGCDCKDAANYILK(bi)NLDLYDEHEAKK_;_GFGCDCKDAANYILK(bi)NLDLYDEHEAKK_;_GFGCDCKDAANYILK(bi)NLDLYDEHEAKK_;_GFGCDCKDAANYILK(bi)NLDLYDEHEAKK_;_GFGCDCKDAANYILK(bi)NLDLYDEHEAKK_;_GFGCDCKDAANYILK(bi)NLDLYDEHEAKK_;_GFGCDCKDAANYILK(bi)NLDLYDEHEAKK_;_GFGCDCKDAANYILK(bi)NLDLY…	GFGCDCKDAANYILK(1)NLDLYDEHEAKK;GFGCDCKDAANYILK(1)NLDLYDEHEAKK;GFGCDCKDAANYILK(1)NLDLYDEHEAKK;GFGCDCKDAANYILK(1)NLDLYDEHEAKK;GFGCDCKDAANYILK(1)NLDLYDEHEAKK;GFGCDCKDAANYILK(1)NLDLYDEHEAKK;GFGCDCK(0.001)DAANYILK(0.999)NLDLYDEHEAKK;GFGCDCKDAANYILK(1)NLDLYDEHEAKK;GFGCDCKDAANYILK(1)NLDLYDEHEAKK;GFGCDCKDAANYILK(1)NLDLYDEHEAKK;GFGCDCKDAANYILK(1)NLDLYDEHEAKK;GFGCDCKDAANYILK(1)NLDLYDEHEAKK;GFGCDCK(0.001)DA…	GFGCDCK(-46.62)DAANYILK(46.62)NLDLYDEHEAK(-78.39)K(-78.39);GFGCDCK(-70.77)DAANYILK(70.77)NLDLYDEHEAK(-97.22)K(-97.22);GFGCDCK(-69.9)DAANYILK(60.3)NLDLYDEHEAK(-60.3)K(-60.3);GFGCDCK(-64.95)DAANYILK(63.82)NLDLYDEHEAK(-63.82)K(-63.82);GFGCDCK(-37.44)DAANYILK(37.44)NLDLYDEHEAK(-91.26)K(-91.26);GFGCDCK(-67.68)DAANYILK(67.68)NLDLYDEHEAK(-85.68)K(-85.68);GFGCDCK(-30.6)DAANYILK(30.6)NLDLYDEHEAK(-94.71)K(…			_GFGCDCKDAANYILK(bi)NLDLYDEHEAKK_;_GFGCDCK(bi)DAANYILK(bi)NLDLYDEHEAKK_
PF3D7_0532300	P. falciparum	Plasmodium exported protein (PHISTb), unknown function				23.4425	23.8576	23.0233	24.5045	23.895	23.2821							2 Biotin (K)	0	2			84764000	7.35e-15	155.79	109.25	15	3	2	2775.31	35.595	GIDLSNVNYDDHFKNGKFLK	184	NaN	NaN	NaN		NaN	NaN	NaN		319	338	_GIDLSNVNYDDHFKNGKFLK(bi)_;_GIDLSNVNYDDHFKNGKFLK(bi)_;_GIDLSNVNYDDHFKNGK(bi)FLK_;_GIDLSNVNYDDHFKNGK(bi)FLK_;_GIDLSNVNYDDHFKNGK(bi)FLK_;_GIDLSNVNYDDHFKNGK(bi)FLK_;_GIDLSNVNYDDHFKNGKFLK(bi)_;_GIDLSNVNYDDHFKNGKFLK(bi)_;_GIDLSNVNYDDHFKNGKFLK(bi)_;_GIDLSNVNYDDHFKNGKFLK(bi)_;_GIDLSNVNYDDHFKNGK(bi)FLK_;_GIDLSNVNYDDHFKNGK(bi)FLK_;_GIDLSNVNYDDHFKNGKFLK(bi)_;_GIDLSNVNYDDHFKNGK(bi)FLK_;_GIDLSNVNYDDHFKNGK(bi…	GIDLSNVNYDDHFK(0.003)NGK(0.374)FLK(0.624);GIDLSNVNYDDHFK(0.091)NGK(0.39)FLK(0.519);GIDLSNVNYDDHFKNGK(0.631)FLK(0.369);GIDLSNVNYDDHFKNGK(0.922)FLK(0.078);GIDLSNVNYDDHFK(0.005)NGK(0.697)FLK(0.297);GIDLSNVNYDDHFK(0.012)NGK(0.494)FLK(0.494);GIDLSNVNYDDHFK(0.07)NGK(0.411)FLK(0.519);GIDLSNVNYDDHFK(0.078)NGK(0.404)FLK(0.517);GIDLSNVNYDDHFK(0.079)NGK(0.372)FLK(0.549);GIDLSNVNYDDHFK(0.075)NGK(0.377)FLK(0.…	GIDLSNVNYDDHFK(-23.76)NGK(-2.23)FLK(2.23);GIDLSNVNYDDHFK(-7.55)NGK(-1.23)FLK(1.23);GIDLSNVNYDDHFK(-58.03)NGK(2.33)FLK(-2.33);GIDLSNVNYDDHFK(-43.04)NGK(10.72)FLK(-10.72);GIDLSNVNYDDHFK(-21.09)NGK(3.7)FLK(-3.7);GIDLSNVNYDDHFK(-16.29)NGK(0)FLK(0);GIDLSNVNYDDHFK(-8.71)NGK(-1.01)FLK(1.01);GIDLSNVNYDDHFK(-8.19)NGK(-1.07)FLK(1.07);GIDLSNVNYDDHFK(-8.42)NGK(-1.69)FLK(1.69);GIDLSNVNYDDHFK(-8.66)NGK(-1.62)F…			_GIDLSNVNYDDHFKNGKFLK(bi)_;_GIDLSNVNYDDHFKNGK(bi)FLK_;_GIDLSNVNYDDHFK(bi)NGKFLK_;_GIDLSNVNYDDHFK(bi)NGK(bi)FLK_;_GIDLSNVNYDDHFK(bi)NGKFLK(bi)_
PF3D7_0532300	P. falciparum	Plasmodium exported protein (PHISTb), unknown function					22.1663		23.7389	23.0738	22.0197							2 Biotin (K)	0	2			31743000	0.00018286	72.11	44.335	7	NaN	3	4324.04	32.687	GIDLSNVNYDDHFKNGKFLKNYSTHENTYPTLK	184	NaN	NaN	NaN		NaN	NaN	NaN		319	351	_GIDLSNVNYDDHFKNGK(bi)FLK(bi)NYSTHENTYPTLK_;_GIDLSNVNYDDHFKNGK(bi)FLK(bi)NYSTHENTYPTLK_;_GIDLSNVNYDDHFKNGK(bi)FLK(bi)NYSTHENTYPTLK_;_GIDLSNVNYDDHFKNGK(bi)FLK(bi)NYSTHENTYPTLK_;_GIDLSNVNYDDHFKNGK(bi)FLK(bi)NYSTHENTYPTLK_;_GIDLSNVNYDDHFKNGK(bi)FLK(bi)NYSTHENTYPTLK_	GIDLSNVNYDDHFK(0.125)NGK(0.944)FLK(0.931)NYSTHENTYPTLK(0.001);GIDLSNVNYDDHFK(0.488)NGK(0.815)FLK(0.697)NYSTHENTYPTLK(0.001);GIDLSNVNYDDHFK(0.367)NGK(0.724)FLK(0.909)NYSTHENTYPTLK;GIDLSNVNYDDHFK(0.394)NGK(0.82)FLK(0.785)NYSTHENTYPTLK(0.001);GIDLSNVNYDDHFK(0.258)NGK(0.8)FLK(0.94)NYSTHENTYPTLK(0.002);GIDLSNVNYDDHFK(0.115)NGK(0.943)FLK(0.943)NYSTHENTYPTLK	GIDLSNVNYDDHFK(-11.07)NGK(11.93)FLK(11.07)NYSTHENTYPTLK(-35.87);GIDLSNVNYDDHFK(-2.27)NGK(4.42)FLK(2.27)NYSTHENTYPTLK(-33.04);GIDLSNVNYDDHFK(-3.61)NGK(3.61)FLK(8.42)NYSTHENTYPTLK(-54.81);GIDLSNVNYDDHFK(-4.5)NGK(5.28)FLK(4.5)NYSTHENTYPTLK(-31.5);GIDLSNVNYDDHFK(-5.71)NGK(5.71)FLK(11)NYSTHENTYPTLK(-29.28);GIDLSNVNYDDHFK(-11.89)NGK(11.89)FLK(11.89)NYSTHENTYPTLK(-37.43)			_GIDLSNVNYDDHFKNGK(bi)FLK(bi)NYSTHENTYPTLK_
PF3D7_0730900	P. falciparum	EMP1-trafficking protein						21.2201	23.4551	22.6081	21.2178				22.9213			2 Biotin (K)	0	2			30740000	0.002023	107.53	67.052	2	3	3	1942.98	25.661	GKFVDNREKTLGK	222	NaN	NaN	NaN		NaN	NaN	NaN		1875	1887	_GKFVDNREK(bi)TLGK_;_GKFVDNREK(bi)TLGK_;_GKFVDNREK(bi)TLGK_;_GK(bi)FVDNREK(bi)TLGK_;_GK(bi)FVDNREK(bi)TLGK_;_GK(bi)FVDNREK(bi)TLGK_;_GK(bi)FVDNREK(bi)TLGK_;_GK(bi)FVDNREK(bi)TLGK_	GKFVDNREK(1)TLGK;GK(1)FVDNREK(0.999)TLGK(0.001);GK(1)FVDNREK(1)TLGK;GK(1)FVDNREK(0.917)TLGK(0.083)	GK(-58.06)FVDNREK(45.26)TLGK(-45.26);GK(88.53)FVDNREK(32.46)TLGK(-32.46);GK(94.11)FVDNREK(46.11)TLGK(-46.11);GK(67.84)FVDNREK(10.42)TLGK(-10.42)			_GKFVDNREK(bi)TLGK_;_GK(bi)FVDNREK(bi)TLGK_
PF3D7_0202000	P. falciparum	knob-associated histidine-rich protein				23.0088	22.6595	22.4466	22.5307	22.6527	22.5991							2 Biotin (K)	0	2			39787000	1.03e-10	143.04	90.929	13	NaN	2	2404.08	21.572	GQCAAEGATKGATKEASTSK	117	NaN	NaN	NaN		NaN	NaN	NaN		532	551	_GQCAAEGATKGATK(bi)EASTSK_;_GQCAAEGATKGATK(bi)EASTSK_;_GQCAAEGATKGATK(bi)EASTSK_;_GQCAAEGATK(bi)GATKEASTSK_;_GQCAAEGATKGATK(bi)EASTSK_;_GQCAAEGATK(bi)GATKEASTSK_;_GQCAAEGATKGATK(bi)EASTSK_;_GQCAAEGATK(bi)GATKEASTSK_;_GQCAAEGATKGATK(bi)EASTSK_;_GQCAAEGATK(bi)GATKEASTSK_;_GQCAAEGATKGATK(bi)EASTSK_;_GQCAAEGATK(bi)GATKEASTSK_;_GQCAAEGATK(bi)GATKEASTSK_;_GQCAAEGATK(bi)GATKEASTSK_;_GQCAAEGATK(bi)GATK(b…	GQCAAEGATK(0.092)GATK(0.903)EASTSK(0.005);GQCAAEGATK(0.139)GATK(0.857)EASTSK(0.004);GQCAAEGATK(0.32)GATK(0.666)EASTSK(0.014);GQCAAEGATK(0.996)GATK(0.004)EASTSK;GQCAAEGATK(0.065)GATK(0.933)EASTSK(0.002);GQCAAEGATK(0.664)GATK(0.331)EASTSK(0.005);GQCAAEGATK(0.017)GATK(0.924)EASTSK(0.059);GQCAAEGATK(0.929)GATK(0.071)EASTSK;GQCAAEGATKGATK(0.994)EASTSK(0.006);GQCAAEGATK(0.983)GATK(0.017)EASTSK;GQCAAEGA…	GQCAAEGATK(-9.93)GATK(9.93)EASTSK(-22.35);GQCAAEGATK(-7.89)GATK(7.89)EASTSK(-23.35);GQCAAEGATK(-3.18)GATK(3.18)EASTSK(-16.75);GQCAAEGATK(24.06)GATK(-24.06)EASTSK(-36.91);GQCAAEGATK(-11.54)GATK(11.54)EASTSK(-27.26);GQCAAEGATK(3.03)GATK(-3.03)EASTSK(-21.57);GQCAAEGATK(-17.42)GATK(11.93)EASTSK(-11.93);GQCAAEGATK(11.2)GATK(-11.2)EASTSK(-33.26);GQCAAEGATK(-40.19)GATK(22.19)EASTSK(-22.19);GQCAAEGATK(17…			_GQCAAEGATKGATK(bi)EASTSK_;_GQCAAEGATK(bi)GATKEASTSK_;_GQCAAEGATK(bi)GATK(bi)EASTSK_;_GQCAAEGATK(bi)GATKEASTSK(bi)_
PF3D7_0730900	P. falciparum	EMP1-trafficking protein				22.9413	23.0694	22.5954	23.48	23.5285	23.2419	28.2891	28.8534	28.5315	28.9117	28.5499	28.604	2 Biotin (K)	0	2			2563800000	9.72e-19	243.91	128.68	48	NaN	2	1601.78	24.714	GQKYGSKNIR	222	1	189.58	189.584	+	NaN	NaN	NaN		1569	1578	_GQK(bi)YGSK(bi)NIR_;_GQK(bi)YGSK(bi)NIR_;_GQK(bi)YGSK(bi)NIR_;_GQK(bi)YGSK(bi)NIR_;_GQK(bi)YGSK(bi)NIR_;_GQK(bi)YGSK(bi)NIR_;_GQK(bi)YGSK(bi)NIR_;_GQK(bi)YGSK(bi)NIR_;_GQK(bi)YGSK(bi)NIR_;_GQK(bi)YGSK(bi)NIR_;_GQK(bi)YGSK(bi)NIR_;_GQK(bi)YGSK(bi)NIR_;_GQK(bi)YGSK(bi)NIR_;_GQK(bi)YGSK(bi)NIR_;_GQK(bi)YGSK(bi)NIR_;_GQK(bi)YGSK(bi)NIR_;_GQK(bi)YGSK(bi)NIR_;_GQK(bi)YGSK(bi)NIR_;_GQK(bi)YGSK(bi)NIR_;…	GQK(1)YGSK(1)NIR;GQK(1)YGSK(1)NIR;GQK(1)YGSK(1)NIR;GQK(1)YGSK(1)NIR;GQK(1)YGSK(1)NIR;GQK(1)YGSK(1)NIR;GQK(1)YGSK(1)NIR;GQK(1)YGSK(1)NIR;GQK(1)YGSK(1)NIR;GQK(1)YGSK(1)NIR;GQK(1)YGSK(1)NIR;GQK(1)YGSK(1)NIR;GQK(1)YGSK(1)NIR;GQK(1)YGSK(1)NIR;GQK(1)YGSK(1)NIR;GQK(1)YGSK(1)NIR;GQK(1)YGSK(1)NIR;GQK(1)YGSK(1)NIR;GQK(1)YGSK(1)NIR;GQK(1)YGSK(1)NIR;GQK(1)YGSK(1)NIR;GQKYGSK(1)NIR;GQKYGSK(1)NIR	GQK(123.62)YGSK(123.62)NIR;GQK(127.87)YGSK(127.87)NIR;GQK(120.77)YGSK(120.77)NIR;GQK(181.68)YGSK(181.68)NIR;GQK(146.16)YGSK(146.16)NIR;GQK(150.46)YGSK(150.46)NIR;GQK(192.44)YGSK(192.44)NIR;GQK(211.64)YGSK(211.64)NIR;GQK(89.9)YGSK(89.9)NIR;GQK(132.25)YGSK(132.25)NIR;GQK(220.1)YGSK(220.1)NIR;GQK(208.84)YGSK(208.84)NIR;GQK(206.97)YGSK(206.97)NIR;GQK(217.02)YGSK(217.02)NIR;GQK(105.13)YGSK(105.13)NIR;…			_GQK(bi)YGSK(bi)NIR_;_GQKYGSK(bi)NIR_
PF3D7_0730900	P. falciparum	EMP1-trafficking protein				22.6284	22.7165	22.4791	23.0615	23.2678	22.8691	28.0965	28.5969	28.3239	28.6492	28.1795	28.4113	2 Biotin (K)	0	2			2156600000	1.36e-26	255.19	186.63	52	NaN	2	1587.77	22.893	GQKYGSKNVR	222	1	99.752	99.752	+	NaN	NaN	NaN		1185	1194	_GQK(bi)YGSK(bi)NVR_;_GQK(bi)YGSK(bi)NVR_;_GQK(bi)YGSK(bi)NVR_;_GQK(bi)YGSK(bi)NVR_;_GQK(bi)YGSK(bi)NVR_;_GQK(bi)YGSK(bi)NVR_;_GQK(bi)YGSK(bi)NVR_;_GQK(bi)YGSK(bi)NVR_;_GQK(bi)YGSK(bi)NVR_;_GQK(bi)YGSK(bi)NVR_;_GQK(bi)YGSK(bi)NVR_;_GQK(bi)YGSK(bi)NVR_;_GQK(bi)YGSK(bi)NVR_;_GQK(bi)YGSK(bi)NVR_;_GQK(bi)YGSK(bi)NVR_;_GQK(bi)YGSK(bi)NVR_;_GQK(bi)YGSK(bi)NVR_;_GQK(bi)YGSK(bi)NVR_;_GQK(bi)YGSK(bi)NVR_;…	GQK(1)YGSK(1)NVR;GQK(1)YGSK(1)NVR;GQK(1)YGSK(1)NVR;GQK(1)YGSK(1)NVR;GQK(1)YGSK(1)NVR;GQK(1)YGSK(1)NVR;GQK(1)YGSK(1)NVR;GQK(1)YGSK(1)NVR;GQK(1)YGSK(1)NVR;GQK(1)YGSK(1)NVR;GQK(1)YGSK(1)NVR;GQK(1)YGSK(1)NVR;GQK(1)YGSK(1)NVR;GQK(1)YGSK(1)NVR;GQK(1)YGSK(1)NVR;GQK(1)YGSK(1)NVR;GQK(1)YGSK(1)NVR;GQK(1)YGSK(1)NVR;GQK(1)YGSK(1)NVR;GQK(1)YGSK(1)NVR;GQK(1)YGSK(1)NVR;GQK(1)YGSK(1)NVR;GQK(1)YGSK(1)NVR	GQK(194.48)YGSK(194.48)NVR;GQK(184.36)YGSK(184.36)NVR;GQK(166.14)YGSK(166.14)NVR;GQK(157.97)YGSK(157.97)NVR;GQK(172.21)YGSK(172.21)NVR;GQK(137.01)YGSK(137.01)NVR;GQK(212.89)YGSK(212.89)NVR;GQK(221.5)YGSK(221.5)NVR;GQK(112.83)YGSK(112.83)NVR;GQK(255.19)YGSK(255.19)NVR;GQK(223.87)YGSK(223.87)NVR;GQK(139.32)YGSK(139.32)NVR;GQK(199.03)YGSK(199.03)NVR;GQK(229.82)YGSK(229.82)NVR;GQK(155)YGSK(155)NVR;GQ…			_GQK(bi)YGSK(bi)NVR_
PF3D7_0730900	P. falciparum	EMP1-trafficking protein										21.8654			22.0043	21.965	21.1101	2 Biotin (K)	0	2			14385000	0.00013797	113.51	73.61	7	3	2	2896.3	38.028	GSYTTKSYVSEFKSNYDGGINK	222	NaN	NaN	NaN		NaN	NaN	NaN		454	475	_GSYTTK(bi)SYVSEFK(bi)SNYDGGINK_;_GSYTTK(bi)SYVSEFK(bi)SNYDGGINK_;_GSYTTK(bi)SYVSEFK(bi)SNYDGGINK_;_GSYTTK(bi)SYVSEFK(bi)SNYDGGINK_;_GSYTTK(bi)SYVSEFK(bi)SNYDGGINK_	GSYTTK(1)SYVSEFK(1)SNYDGGINK;GSYTTK(1)SYVSEFK(1)SNYDGGINK;GSYTTK(1)SYVSEFK(1)SNYDGGINK;GSYTTK(1)SYVSEFK(1)SNYDGGINK	GSYTTK(110.72)SYVSEFK(50.47)SNYDGGINK(-50.47);GSYTTK(84.68)SYVSEFK(53.04)SNYDGGINK(-53.04);GSYTTK(84.14)SYVSEFK(46.16)SNYDGGINK(-46.16);GSYTTK(81.66)SYVSEFK(54.32)SNYDGGINK(-54.32)			_GSYTTK(bi)SYVSEFK(bi)SNYDGGINK_
PF3D7_0730900	P. falciparum	EMP1-trafficking protein										22.6085	22.4488	21.5344	22.1453	21.8635	21.9249	2 Biotin (K)	0	2			27593000	5.75e-05	103.53	72.156	6	3	3	3605.63	35.385	GSYTTKSYVSEFKSNYDGGINKESYTTK	222	1	103.53	76.9348	+	NaN	NaN	NaN		454	481	_GSYTTK(bi)SYVSEFK(bi)SNYDGGINKESYTTK_;_GSYTTK(bi)SYVSEFK(bi)SNYDGGINKESYTTK_;_GSYTTK(bi)SYVSEFK(bi)SNYDGGINKESYTTK_;_GSYTTK(bi)SYVSEFK(bi)SNYDGGINKESYTTK_;_GSYTTK(bi)SYVSEFK(bi)SNYDGGINKESYTTK_;_GSYTTK(bi)SYVSEFK(bi)SNYDGGINKESYTTK_;_GSYTTK(bi)SYVSEFK(bi)SNYDGGINKESYTTK_	GSYTTK(1)SYVSEFK(1)SNYDGGINKESYTTK;GSYTTK(1)SYVSEFK(0.999)SNYDGGINK(0.001)ESYTTK;GSYTTK(1)SYVSEFK(1)SNYDGGINKESYTTK;GSYTTK(1)SYVSEFK(1)SNYDGGINKESYTTK;GSYTTK(1)SYVSEFK(1)SNYDGGINKESYTTK;GSYTTK(1)SYVSEFK(0.999)SNYDGGINK(0.001)ESYTTK;GSYTTK(1)SYVSEFK(1)SNYDGGINKESYTTK	GSYTTK(80.55)SYVSEFK(53.77)SNYDGGINK(-53.77)ESYTTK(-72.01);GSYTTK(45.3)SYVSEFK(32.11)SNYDGGINK(-32.11)ESYTTK(-42.15);GSYTTK(58.44)SYVSEFK(44.24)SNYDGGINK(-44.24)ESYTTK(-54.16);GSYTTK(52.24)SYVSEFK(47.1)SNYDGGINK(-47.1)ESYTTK(-68.92);GSYTTK(76.93)SYVSEFK(49.01)SNYDGGINK(-49.01)ESYTTK(-77.12);GSYTTK(45.87)SYVSEFK(32.16)SNYDGGINK(-32.16)ESYTTK(-39.03);GSYTTK(68.13)SYVSEFK(41.29)SNYDGGINK(-41.29)ESYT…			_GSYTTK(bi)SYVSEFK(bi)SNYDGGINKESYTTK_
PF3D7_0730900	P. falciparum	EMP1-trafficking protein										23.2821	23.4676	22.8892	23.48	23.5638	23.2678	2 Biotin (K)	0	2			63723000	6.81e-05	114.54	78.07	11	NaN	2	2407.07	21.456	HEHHEDHLKGKFGDNR	222	NaN	NaN	NaN		NaN	NaN	NaN		1910	1925	_HEHHEDHLKGK(bi)FGDNR_;_HEHHEDHLKGK(bi)FGDNR_;_HEHHEDHLKGK(bi)FGDNR_;_HEHHEDHLKGK(bi)FGDNR_;_HEHHEDHLKGK(bi)FGDNR_;_HEHHEDHLKGK(bi)FGDNR_;_HEHHEDHLKGK(bi)FGDNR_;_HEHHEDHLKGK(bi)FGDNR_;_HEHHEDHLKGK(bi)FGDNR_;_HEHHEDHLKGK(bi)FGDNR_;_HEHHEDHLK(bi)GKFGDNR_;_HEHHEDHLKGK(bi)FGDNR_;_HEHHEDHLKGK(bi)FGDNR_;_HEHHEDHLK(bi)GKFGDNR_;_HEHHEDHLKGK(bi)FGDNR_;_HEHHEDHLKGK(bi)FGDNR_;_HEHHEDHLK(bi)GK(bi)FGDNR_;_HEH…	HEHHEDHLK(0.248)GK(0.752)FGDNR;HEHHEDHLK(0.2)GK(0.8)FGDNR;HEHHEDHLK(0.007)GK(0.993)FGDNR;HEHHEDHLK(0.16)GK(0.84)FGDNR;HEHHEDHLK(0.29)GK(0.71)FGDNR;HEHHEDHLK(0.085)GK(0.915)FGDNR;HEHHEDHLK(0.243)GK(0.757)FGDNR;HEHHEDHLK(0.232)GK(0.768)FGDNR;HEHHEDHLK(0.039)GK(0.961)FGDNR;HEHHEDHLK(0.204)GK(0.796)FGDNR;HEHHEDHLK(0.512)GK(0.488)FGDNR;HEHHEDHLK(0.326)GK(0.674)FGDNR;HEHHEDHLK(0.055)GK(0.945)FGDNR;HEHH…	HEHHEDHLK(-4.81)GK(4.81)FGDNR;HEHHEDHLK(-6.01)GK(6.01)FGDNR;HEHHEDHLK(-21.61)GK(21.61)FGDNR;HEHHEDHLK(-7.19)GK(7.19)FGDNR;HEHHEDHLK(-3.88)GK(3.88)FGDNR;HEHHEDHLK(-10.34)GK(10.34)FGDNR;HEHHEDHLK(-4.94)GK(4.94)FGDNR;HEHHEDHLK(-5.19)GK(5.19)FGDNR;HEHHEDHLK(-13.94)GK(13.94)FGDNR;HEHHEDHLK(-5.9)GK(5.9)FGDNR;HEHHEDHLK(0.21)GK(-0.21)FGDNR;HEHHEDHLK(-3.16)GK(3.16)FGDNR;HEHHEDHLK(-12.33)GK(12.33)FGDNR;HEH…			_HEHHEDHLKGK(bi)FGDNR_;_HEHHEDHLK(bi)GKFGDNR_;_HEHHEDHLK(bi)GK(bi)FGDNR_
PF3D7_0730900	P. falciparum	EMP1-trafficking protein										22.5626	22.3306	21.8804	22.7113	22.6925	22.6806	2 Biotin (K)	0	2			35698000	2.05e-06	148.33	101.95	8	NaN	2	2433.07	23.268	HEHHEEYVKGKFGDNR	222	NaN	NaN	NaN		NaN	NaN	NaN		1888	1903	_HEHHEEYVK(bi)GK(bi)FGDNR_;_HEHHEEYVK(bi)GK(bi)FGDNR_;_HEHHEEYVK(bi)GK(bi)FGDNR_;_HEHHEEYVK(bi)GK(bi)FGDNR_;_HEHHEEYVK(bi)GK(bi)FGDNR_;_HEHHEEYVK(bi)GK(bi)FGDNR_;_HEHHEEYVK(bi)GK(bi)FGDNR_;_HEHHEEYVK(bi)GK(bi)FGDNR_	HEHHEEYVK(1)GK(1)FGDNR;HEHHEEYVK(1)GK(1)FGDNR;HEHHEEYVK(1)GK(1)FGDNR;HEHHEEYVK(1)GK(1)FGDNR;HEHHEEYVK(1)GK(1)FGDNR;HEHHEEYVK(1)GK(1)FGDNR;HEHHEEYVK(1)GK(1)FGDNR	HEHHEEYVK(128.45)GK(128.45)FGDNR;HEHHEEYVK(99.04)GK(99.04)FGDNR;HEHHEEYVK(124.46)GK(124.46)FGDNR;HEHHEEYVK(88.32)GK(88.32)FGDNR;HEHHEEYVK(148.33)GK(148.33)FGDNR;HEHHEEYVK(118.31)GK(118.31)FGDNR;HEHHEEYVK(101.78)GK(101.78)FGDNR			_HEHHEEYVK(bi)GK(bi)FGDNR_
PF3D7_0730900	P. falciparum	EMP1-trafficking protein										21.9505				21.3662	21.5912	2 Biotin (K)	0	2			9915300	1.23e-10	152.68	112.07	2	4	3	2690.21	21.092	HEHHEEYVKGKFGDNREK	222	NaN	NaN	NaN		NaN	NaN	NaN		1888	1905	_HEHHEEYVK(bi)GK(bi)FGDNREK_;_HEHHEEYVK(bi)GK(bi)FGDNREK_;_HEHHEEYVK(bi)GK(bi)FGDNREK_	HEHHEEYVK(1)GK(0.891)FGDNREK(0.109);HEHHEEYVK(1)GK(0.97)FGDNREK(0.03);HEHHEEYVK(1)GK(0.825)FGDNREK(0.175)	HEHHEEYVK(50.42)GK(9.15)FGDNREK(-9.15);HEHHEEYVK(47.09)GK(15.07)FGDNREK(-15.07);HEHHEEYVK(63.45)GK(6.74)FGDNREK(-6.74)			_HEHHEEYVK(bi)GK(bi)FGDNREK_
PF3D7_0730900	P. falciparum	EMP1-trafficking protein										27.4938	27.6181	27.3325	27.8081	27.611	27.5754	2 Biotin (K)	0	2			1204800000	1.14e-08	171.56	119.19	56	NaN	2	2475.12	24.573	HEHHEEYVKGKFVDNR	222	NaN	NaN	NaN		NaN	NaN	NaN		1954	1969	_HEHHEEYVK(bi)GKFVDNR_;_HEHHEEYVK(bi)GKFVDNR_;_HEHHEEYVKGK(bi)FVDNR_;_HEHHEEYVKGK(bi)FVDNR_;_HEHHEEYVK(bi)GKFVDNR_;_HEHHEEYVK(bi)GKFVDNR_;_HEHHEEYVKGK(bi)FVDNR_;_HEHHEEYVKGK(bi)FVDNR_;_HEHHEEYVK(bi)GKFVDNR_;_HEHHEEYVK(bi)GKFVDNR_;_HEHHEEYVK(bi)GKFVDNR_;_HEHHEEYVKGK(bi)FVDNR_;_HEHHEEYVKGK(bi)FVDNR_;_HEHHEEYVK(bi)GK(bi)FVDNR_;_HEHHEEYVK(bi)GK(bi)FVDNR_;_HEHHEEYVK(bi)GK(bi)FVDNR_;_HEHHEEYVK(bi)GK(bi…	HEHHEEYVK(0.819)GK(0.181)FVDNR;HEHHEEYVK(0.833)GK(0.167)FVDNR;HEHHEEYVK(0.072)GK(0.928)FVDNR;HEHHEEYVK(0.243)GK(0.757)FVDNR;HEHHEEYVK(0.529)GK(0.471)FVDNR;HEHHEEYVK(0.809)GK(0.191)FVDNR;HEHHEEYVK(0.489)GK(0.511)FVDNR;HEHHEEYVK(0.483)GK(0.517)FVDNR;HEHHEEYVK(0.932)GK(0.068)FVDNR;HEHHEEYVK(0.793)GK(0.207)FVDNR;HEHHEEYVK(0.664)GK(0.336)FVDNR;HEHHEEYVK(1)GK(1)FVDNR;HEHHEEYVK(1)GK(1)FVDNR;HEHHEEYVK(1)…	HEHHEEYVK(6.55)GK(-6.55)FVDNR;HEHHEEYVK(6.97)GK(-6.97)FVDNR;HEHHEEYVK(-11.08)GK(11.08)FVDNR;HEHHEEYVK(-4.94)GK(4.94)FVDNR;HEHHEEYVK(0.5)GK(-0.5)FVDNR;HEHHEEYVK(6.27)GK(-6.27)FVDNR;HEHHEEYVK(-0.19)GK(0.19)FVDNR;HEHHEEYVK(-0.3)GK(0.3)FVDNR;HEHHEEYVK(11.39)GK(-11.39)FVDNR;HEHHEEYVK(5.84)GK(-5.84)FVDNR;HEHHEEYVK(2.95)GK(-2.95)FVDNR;HEHHEEYVK(113.11)GK(113.11)FVDNR;HEHHEEYVK(154.47)GK(154.47)FVDNR;HEH…			_HEHHEEYVK(bi)GKFVDNR_;_HEHHEEYVKGK(bi)FVDNR_;_HEHHEEYVK(bi)GK(bi)FVDNR_
PF3D7_0730900	P. falciparum	EMP1-trafficking protein										24.1253	24.5638	23.976	24.3239	24.0443	24.1946	2 Biotin (K)	0	2			117110000	2.05e-23	209.33	160.75	15	NaN	3	2732.26	22.342	HEHHEEYVKGKFVDNREK	222	NaN	NaN	NaN		NaN	NaN	NaN		1954	1971	_HEHHEEYVK(bi)GKFVDNREK_;_HEHHEEYVKGK(bi)FVDNREK_;_HEHHEEYVK(bi)GKFVDNREK_;_HEHHEEYVK(bi)GK(bi)FVDNREK_;_HEHHEEYVK(bi)GK(bi)FVDNREK_;_HEHHEEYVK(bi)GK(bi)FVDNREK_;_HEHHEEYVK(bi)GK(bi)FVDNREK_;_HEHHEEYVK(bi)GK(bi)FVDNREK_;_HEHHEEYVK(bi)GK(bi)FVDNREK_;_HEHHEEYVK(bi)GK(bi)FVDNREK_;_HEHHEEYVK(bi)GK(bi)FVDNREK_;_HEHHEEYVK(bi)GK(bi)FVDNREK_;_HEHHEEYVK(bi)GK(bi)FVDNREK_;_HEHHEEYVK(bi)GK(bi)FVDNREK_;_HEHH…	HEHHEEYVK(0.699)GK(0.301)FVDNREK;HEHHEEYVK(0.01)GK(0.847)FVDNREK(0.143);HEHHEEYVK(1)GK(1)FVDNREK;HEHHEEYVK(1)GK(1)FVDNREK;HEHHEEYVK(1)GK(1)FVDNREK;HEHHEEYVK(1)GK(1)FVDNREK;HEHHEEYVK(1)GK(0.994)FVDNREK(0.006);HEHHEEYVK(1)GK(1)FVDNREK;HEHHEEYVK(1)GK(1)FVDNREK;HEHHEEYVK(1)GK(1)FVDNREK;HEHHEEYVK(1)GK(1)FVDNREK;HEHHEEYVK(1)GK(1)FVDNREK;HEHHEEYVK(1)GK(0.999)FVDNREK(0.001);HEHHEEYVK(1)GK(0.998)FVDNREK(0…	HEHHEEYVK(3.66)GK(-3.66)FVDNREK(-35.93);HEHHEEYVK(-19.21)GK(7.74)FVDNREK(-7.74);HEHHEEYVK(83.93)GK(33.43)FVDNREK(-33.43);HEHHEEYVK(61.7)GK(37.39)FVDNREK(-37.39);HEHHEEYVK(106.12)GK(54.94)FVDNREK(-54.94);HEHHEEYVK(86.09)GK(42.25)FVDNREK(-42.25);HEHHEEYVK(58.29)GK(22.46)FVDNREK(-22.46);HEHHEEYVK(57.17)GK(40.31)FVDNREK(-40.31);HEHHEEYVK(82.63)GK(39.6)FVDNREK(-39.6);HEHHEEYVK(91.99)GK(45.66)FVDNREK(-…			_HEHHEEYVK(bi)GKFVDNREK_;_HEHHEEYVKGK(bi)FVDNREK_;_HEHHEEYVK(bi)GK(bi)FVDNREK_
PF3D7_0730900	P. falciparum	EMP1-trafficking protein										27.8445	28.1015	27.6527	28.217	27.9484	27.9484	2 Biotin (K)	0	2			1570000000	1.42e-14	224.06	137.31	45	NaN	2	2140.97	22.718	HHEDHLKGKFGDNR	222	NaN	NaN	NaN		NaN	NaN	NaN		1912	1925	_HHEDHLKGK(bi)FGDNR_;_HHEDHLKGK(bi)FGDNR_;_HHEDHLKGK(bi)FGDNR_;_HHEDHLKGK(bi)FGDNR_;_HHEDHLKGK(bi)FGDNR_;_HHEDHLKGK(bi)FGDNR_;_HHEDHLKGK(bi)FGDNR_;_HHEDHLKGK(bi)FGDNR_;_HHEDHLKGK(bi)FGDNR_;_HHEDHLKGK(bi)FGDNR_;_HHEDHLKGK(bi)FGDNR_;_HHEDHLK(bi)GK(bi)FGDNR_;_HHEDHLK(bi)GK(bi)FGDNR_;_HHEDHLK(bi)GK(bi)FGDNR_;_HHEDHLK(bi)GK(bi)FGDNR_;_HHEDHLK(bi)GK(bi)FGDNR_;_HHEDHLK(bi)GK(bi)FGDNR_;_HHEDHLK(bi)GK(bi)…	HHEDHLK(0.087)GK(0.913)FGDNR;HHEDHLK(0.024)GK(0.976)FGDNR;HHEDHLK(0.024)GK(0.976)FGDNR;HHEDHLK(0.177)GK(0.823)FGDNR;HHEDHLK(0.379)GK(0.621)FGDNR;HHEDHLK(0.001)GK(0.999)FGDNR;HHEDHLK(0.096)GK(0.904)FGDNR;HHEDHLK(0.003)GK(0.997)FGDNR;HHEDHLK(1)GK(1)FGDNR;HHEDHLK(1)GK(1)FGDNR;HHEDHLK(1)GK(1)FGDNR;HHEDHLK(1)GK(1)FGDNR;HHEDHLK(1)GK(1)FGDNR;HHEDHLK(1)GK(1)FGDNR;HHEDHLK(1)GK(1)FGDNR;HHEDHLK(1)GK(1)FGDNR…	HHEDHLK(-10.2)GK(10.2)FGDNR;HHEDHLK(-16.04)GK(16.04)FGDNR;HHEDHLK(-16.05)GK(16.05)FGDNR;HHEDHLK(-6.68)GK(6.68)FGDNR;HHEDHLK(-2.14)GK(2.14)FGDNR;HHEDHLK(-30.58)GK(30.58)FGDNR;HHEDHLK(-9.76)GK(9.76)FGDNR;HHEDHLK(-24.6)GK(24.6)FGDNR;HHEDHLK(79.65)GK(79.65)FGDNR;HHEDHLK(206.43)GK(206.43)FGDNR;HHEDHLK(191.63)GK(191.63)FGDNR;HHEDHLK(125.22)GK(125.22)FGDNR;HHEDHLK(166.9)GK(166.9)FGDNR;HHEDHLK(86.54)GK(8…			_HHEDHLKGK(bi)FGDNR_;_HHEDHLK(bi)GK(bi)FGDNR_
PF3D7_0730900	P. falciparum	EMP1-trafficking protein										24.9043	25.4008	24.5404	25.0148	24.4923	24.6811	2 Biotin (K)	0	2			184520000	3.07e-12	176.29	123.84	16	NaN	3	2398.11	20.243	HHEDHLKGKFGDNREK	222	NaN	NaN	NaN		NaN	NaN	NaN		1912	1927	_HHEDHLK(bi)GK(bi)FGDNREK_;_HHEDHLK(bi)GK(bi)FGDNREK_;_HHEDHLK(bi)GK(bi)FGDNREK_;_HHEDHLK(bi)GK(bi)FGDNREK_;_HHEDHLK(bi)GK(bi)FGDNREK_;_HHEDHLK(bi)GK(bi)FGDNREK_;_HHEDHLK(bi)GK(bi)FGDNREK_;_HHEDHLK(bi)GK(bi)FGDNREK_;_HHEDHLK(bi)GK(bi)FGDNREK_;_HHEDHLK(bi)GK(bi)FGDNREK_;_HHEDHLK(bi)GK(bi)FGDNREK_;_HHEDHLK(bi)GK(bi)FGDNREK_;_HHEDHLK(bi)GK(bi)FGDNREK_;_HHEDHLK(bi)GK(bi)FGDNREK_;_HHEDHLK(bi)GK(bi)FGD…	HHEDHLK(1)GK(1)FGDNREK;HHEDHLK(1)GK(1)FGDNREK;HHEDHLK(1)GK(0.999)FGDNREK(0.001);HHEDHLK(1)GK(0.987)FGDNREK(0.013);HHEDHLK(1)GK(0.998)FGDNREK(0.002);HHEDHLK(1)GK(1)FGDNREK;HHEDHLK(1)GK(0.994)FGDNREK(0.006);HHEDHLK(1)GK(1)FGDNREK;HHEDHLK(0.999)GK(0.911)FGDNREK(0.09);HHEDHLK(1)GK(1)FGDNREK;HHEDHLK(1)GK(1)FGDNREK;HHEDHLK(1)GK(1)FGDNREK;HHEDHLK(1)GK(0.997)FGDNREK(0.003);HHEDHLK(1)GK(0.999)FGDNREK(0.00…	HHEDHLK(55.37)GK(36.64)FGDNREK(-36.64);HHEDHLK(93.37)GK(67.19)FGDNREK(-67.19);HHEDHLK(58.15)GK(32.37)FGDNREK(-32.37);HHEDHLK(43.02)GK(18.81)FGDNREK(-18.81);HHEDHLK(39.3)GK(26.85)FGDNREK(-26.85);HHEDHLK(54.62)GK(38.2)FGDNREK(-38.2);HHEDHLK(46.03)GK(22.12)FGDNREK(-22.12);HHEDHLK(73.18)GK(56.33)FGDNREK(-56.33);HHEDHLK(29.68)GK(10.1)FGDNREK(-10.1);HHEDHLK(108.74)GK(65.99)FGDNREK(-65.99);HHEDHLK(48.32…			_HHEDHLK(bi)GK(bi)FGDNREK_;_HHEDHLK(bi)GKFGDNREK_;_HHEDHLKGK(bi)FGDNREK_
PF3D7_0730900	P. falciparum	EMP1-trafficking protein				21.4098	21.6791	20.6387	22.3929	21.9243	20.8933	25.9225	26.0443	24.8433	25.8191	25.7995	25.5135	2 Biotin (K)	0	2			347590000	1.42e-33	235.79	184.2	36	NaN	2	2651.23	18.021	HHEKGVNVQSSNTNKHMPR	222	NaN	NaN	NaN		NaN	NaN	NaN		2088	2106	_HHEK(bi)GVNVQSSNTNKHMPR_;_HHEK(bi)GVNVQSSNTNKHMPR_;_HHEK(bi)GVNVQSSNTNKHMPR_;_HHEK(bi)GVNVQSSNTNKHMPR_;_HHEK(bi)GVNVQSSNTNKHMPR_;_HHEK(bi)GVNVQSSNTNKHMPR_;_HHEKGVNVQSSNTNK(bi)HMPR_;_HHEK(bi)GVNVQSSNTNKHMPR_;_HHEK(bi)GVNVQSSNTNKHMPR_;_HHEK(bi)GVNVQSSNTNKHMPR_;_HHEK(bi)GVNVQSSNTNKHMPR_;_HHEK(bi)GVNVQSSNTNKHMPR_;_HHEK(bi)GVNVQSSNTNKHMPR_;_HHEK(bi)GVNVQSSNTNKHMPR_;_HHEK(bi)GVNVQSSNTNKHMPR_;_HHEK(bi)…	HHEK(1)GVNVQSSNTNKHMPR;HHEK(1)GVNVQSSNTNKHMPR;HHEK(1)GVNVQSSNTNKHMPR;HHEK(1)GVNVQSSNTNKHMPR;HHEK(1)GVNVQSSNTNKHMPR;HHEK(1)GVNVQSSNTNKHMPR;HHEKGVNVQSSNTNK(1)HMPR;HHEK(1)GVNVQSSNTNKHMPR;HHEK(1)GVNVQSSNTNKHMPR;HHEK(1)GVNVQSSNTNKHMPR;HHEK(1)GVNVQSSNTNKHMPR;HHEK(1)GVNVQSSNTNKHMPR;HHEK(1)GVNVQSSNTNKHMPR;HHEK(1)GVNVQSSNTNKHMPR;HHEK(1)GVNVQSSNTNKHMPR;HHEK(1)GVNVQSSNTNKHMPR;HHEK(1)GVNVQSSNTNKHMPR;HHEK(1)G…	HHEK(57)GVNVQSSNTNK(-57)HMPR;HHEK(60.34)GVNVQSSNTNK(-60.34)HMPR;HHEK(54.67)GVNVQSSNTNK(-54.67)HMPR;HHEK(49.48)GVNVQSSNTNK(-49.48)HMPR;HHEK(64.46)GVNVQSSNTNK(-64.46)HMPR;HHEK(67.65)GVNVQSSNTNK(-67.65)HMPR;HHEK(-45.34)GVNVQSSNTNK(45.34)HMPR;HHEK(62.59)GVNVQSSNTNK(-62.59)HMPR;HHEK(69.98)GVNVQSSNTNK(-69.98)HMPR;HHEK(70.19)GVNVQSSNTNK(-70.19)HMPR;HHEK(44.54)GVNVQSSNTNK(-44.54)HMPR;HHEK(72.35)GVNVQSSNT…	HHEKGVNVQS(0.299)S(0.299)NT(0.402)NKHMPR;HHEKGVNVQS(0.487)S(0.487)NT(0.025)NKHMPR	HHEKGVNVQS(-1.28)S(-1.28)NT(1.28)NKHMPR;HHEKGVNVQS(0)S(0)NT(-12.88)NKHMPR	_HHEK(bi)GVNVQSSNTNKHMPR_;_HHEKGVNVQSSNTNK(bi)HMPR_;_HHEK(bi)GVNVQSSNT(ph)NKHMPR_;_HHEK(bi)GVNVQS(ph)SNTNKHMPR_;_HHEK(bi)GVNVQSSNTNK(bi)HMPR_;_HHEK(bi)GVNVQSSNTNK(bi)HM(ox)PR_;_HHEK(bi)GVNVQSSNTNKHM(ox)PR_
PF3D7_0730900	P. falciparum	EMP1-trafficking protein										20.8422	22.3914	21.4768	21.5572	22.1482	23.0945	2 Biotin (K)	0	2			26990000	0.00050809	120.86	69.721	7	4	2	1816.86	12.059	HKHHEDHLKGK	222	NaN	NaN	NaN		NaN	NaN	NaN		1976	1986	_HK(bi)HHEDHLK(bi)GK_;_HK(bi)HHEDHLK(bi)GK_;_HK(bi)HHEDHLK(bi)GK_;_HK(bi)HHEDHLK(bi)GK_;_HK(bi)HHEDHLK(bi)GK_;_HK(bi)HHEDHLK(bi)GK_;_HK(bi)HHEDHLK(bi)GK_;_HK(bi)HHEDHLKGK_;_HKHHEDHLK(bi)GK_;_HKHHEDHLK(bi)GK_;_HKHHEDHLK(bi)GK_;_HKHHEDHLK(bi)GK_;_HKHHEDHLK(bi)GK_;_HKHHEDHLK(bi)GK_;_HKHHEDHLK(bi)GK_;_HKHHEDHLK(bi)GK_;_HKHHEDHLK(bi)GK_;_HK(bi)HHEDHLKGK_;_HKHHEDHLK(bi)GK_;_HKHHEDHLK(bi)GK_;_HKHHEDHLK(…	HK(1)HHEDHLK(0.975)GK(0.025);HK(1)HHEDHLK(0.97)GK(0.03);HK(1)HHEDHLK(0.997)GK(0.003);HK(1)HHEDHLK(0.891)GK(0.109);HK(1)HHEDHLK(0.992)GK(0.008);HK(1)HHEDHLK(0.979)GK(0.021);HK(1)HHEDHLKGK;HKHHEDHLK(0.998)GK(0.002);HKHHEDHLK(0.999)GK(0.001);HKHHEDHLK(0.998)GK(0.002);HKHHEDHLK(0.995)GK(0.005);HKHHEDHLK(1)GK;HKHHEDHLK(0.998)GK(0.002);HKHHEDHLK(0.948)GK(0.052);HKHHEDHLK(1)GK;HKHHEDHLK(0.98)GK(0.02);HK…	HK(85.02)HHEDHLK(16)GK(-16);HK(73.01)HHEDHLK(15.09)GK(-15.09);HK(109.27)HHEDHLK(25.24)GK(-25.24);HK(81.34)HHEDHLK(9.1)GK(-9.1);HK(67.44)HHEDHLK(20.8)GK(-20.8);HK(67.78)HHEDHLK(16.62)GK(-16.62);HK(103.92)HHEDHLK(-103.92)GK(-112.53);HK(-126.33)HHEDHLK(26.98)GK(-26.98);HK(-112.47)HHEDHLK(31.84)GK(-31.84);HK(-55.98)HHEDHLK(26.42)GK(-26.42);HK(-51.74)HHEDHLK(23.18)GK(-23.18);HK(-88.25)HHEDHLK(33.98)GK…			_HK(bi)HHEDHLK(bi)GK_;_HK(bi)HHEDHLKGK_;_HKHHEDHLK(bi)GK_
PF3D7_0730900	P. falciparum	EMP1-trafficking protein										24.2821	24.9628	24.4614	25.1719	25.4425	25.5165	2 Biotin (K)	0	2			207550000	9.31e-10	174.21	133.35	32	NaN	3	2406.12	19.95	HKHHEDHLKGKFGDNR	222	1	140.62	101.216	+	NaN	NaN	NaN		1976	1991	_HKHHEDHLK(bi)GK(bi)FGDNR_;_HKHHEDHLK(bi)GK(bi)FGDNR_;_HKHHEDHLK(bi)GK(bi)FGDNR_;_HKHHEDHLK(bi)GK(bi)FGDNR_;_HKHHEDHLK(bi)GK(bi)FGDNR_;_HKHHEDHLK(bi)GK(bi)FGDNR_;_HKHHEDHLK(bi)GK(bi)FGDNR_;_HKHHEDHLK(bi)GK(bi)FGDNR_;_HKHHEDHLK(bi)GK(bi)FGDNR_;_HKHHEDHLK(bi)GK(bi)FGDNR_;_HKHHEDHLK(bi)GK(bi)FGDNR_;_HKHHEDHLK(bi)GK(bi)FGDNR_;_HKHHEDHLK(bi)GK(bi)FGDNR_;_HKHHEDHLK(bi)GK(bi)FGDNR_;_HKHHEDHLK(bi)GK(bi)F…	HKHHEDHLK(1)GK(1)FGDNR;HK(0.141)HHEDHLK(0.864)GK(0.994)FGDNR;HKHHEDHLK(1)GK(1)FGDNR;HKHHEDHLK(1)GK(1)FGDNR;HKHHEDHLK(1)GK(1)FGDNR;HK(0.448)HHEDHLK(0.558)GK(0.994)FGDNR;HKHHEDHLK(1)GK(1)FGDNR;HKHHEDHLK(1)GK(1)FGDNR;HK(0.039)HHEDHLK(0.962)GK(0.999)FGDNR;HK(0.008)HHEDHLK(0.992)GK(1)FGDNR;HKHHEDHLK(1)GK(1)FGDNR;HK(0.243)HHEDHLK(0.758)GK(1)FGDNR;HKHHEDHLK(1)GK(1)FGDNR;HKHHEDHLK(1)GK(1)FGDNR;HK(0.188)H…	HK(-43.38)HHEDHLK(43.38)GK(64.29)FGDNR;HK(-8.02)HHEDHLK(8.02)GK(21.68)FGDNR;HK(-97.35)HHEDHLK(97.35)GK(115.71)FGDNR;HK(-60.88)HHEDHLK(60.88)GK(85.48)FGDNR;HK(-120.24)HHEDHLK(120.24)GK(133.68)FGDNR;HK(-0.97)HHEDHLK(0.97)GK(19.94)FGDNR;HK(-36.9)HHEDHLK(36.9)GK(61.01)FGDNR;HK(-117.42)HHEDHLK(117.42)GK(137.87)FGDNR;HK(-14.02)HHEDHLK(14.02)GK(28.56)FGDNR;HK(-20.94)HHEDHLK(20.94)GK(33.24)FGDNR;HK(-46.7…			_HKHHEDHLK(bi)GK(bi)FGDNR_;_HKHHEDHLKGK(bi)FGDNR_
PF3D7_0730900	P. falciparum	EMP1-trafficking protein										22.8755	23.3645	22.2949	22.6453	22.8409	23.247	2 Biotin (K)	0	2			47618000	2.01e-10	168.68	113.73	19	NaN	2	2395.13	13.409	HKHHEKGVNVQSSNTNK	222	NaN	NaN	NaN		NaN	NaN	NaN		2086	2102	_HKHHEK(bi)GVNVQSSNTNK_;_HKHHEK(bi)GVNVQSSNTNK_;_HKHHEK(bi)GVNVQSSNTNK_;_HKHHEK(bi)GVNVQSSNTNK_;_HKHHEK(bi)GVNVQSSNTNK_;_HKHHEK(bi)GVNVQSSNTNK_;_HKHHEK(bi)GVNVQSSNTNK_;_HKHHEK(bi)GVNVQSSNTNK_;_HK(bi)HHEKGVNVQSSNTNK_;_HKHHEK(bi)GVNVQSSNTNK_;_HKHHEK(bi)GVNVQSSNTNK_;_HK(bi)HHEKGVNVQSSNTNK_;_HKHHEK(bi)GVNVQSSNTNK_;_HKHHEK(bi)GVNVQSSNTNK_;_HK(bi)HHEKGVNVQSSNTNK_;_HKHHEK(bi)GVNVQSSNTNK_;_HKHHEK(bi)GVNV…	HKHHEK(1)GVNVQSSNTNK;HK(0.021)HHEK(0.979)GVNVQSSNTNK;HK(0.198)HHEK(0.802)GVNVQSSNTNK;HK(0.198)HHEK(0.802)GVNVQSSNTNK;HK(0.002)HHEK(0.998)GVNVQSSNTNK;HK(0.003)HHEK(0.997)GVNVQSSNTNK;HK(0.195)HHEK(0.805)GVNVQSSNTNK;HK(0.002)HHEK(0.998)GVNVQSSNTNK;HK(0.779)HHEK(0.221)GVNVQSSNTNK;HK(0.28)HHEK(0.72)GVNVQSSNTNK;HK(0.078)HHEK(0.922)GVNVQSSNTNK;HK(0.566)HHEK(0.434)GVNVQSSNTNK;HKHHEK(1)GVNVQSSNTNK;HK(0.43…	HK(-38.44)HHEK(38.44)GVNVQSSNTNK(-78.46);HK(-16.63)HHEK(16.63)GVNVQSSNTNK(-53.98);HK(-6.07)HHEK(6.07)GVNVQSSNTNK(-71.29);HK(-6.07)HHEK(6.07)GVNVQSSNTNK(-71.29);HK(-27.95)HHEK(27.95)GVNVQSSNTNK(-71.81);HK(-25.14)HHEK(25.14)GVNVQSSNTNK(-89.62);HK(-6.16)HHEK(6.16)GVNVQSSNTNK(-49.11);HK(-27.85)HHEK(27.85)GVNVQSSNTNK(-54.87);HK(5.48)HHEK(-5.48)GVNVQSSNTNK(-52.41);HK(-4.1)HHEK(4.1)GVNVQSSNTNK(-62.89);H…			_HKHHEK(bi)GVNVQSSNTNK_;_HK(bi)HHEKGVNVQSSNTNK_;_HK(bi)HHEK(bi)GVNVQSSNTNK_
PF3D7_0730900	P. falciparum	EMP1-trafficking protein													20.7179	22.2163	23.0453	2 Biotin (K)	0	2			15253000	8.43e-06	114.56	71.854	5	NaN	3	2916.38	15.707	HKHHEKGVNVQSSNTNKHMPR	222	1	65.887	65.8874	+	NaN	NaN	NaN		2086	2106	_HKHHEK(bi)GVNVQSSNTNK(bi)HMPR_;_HK(bi)HHEKGVNVQSSNTNK(bi)HMPR_;_HKHHEK(bi)GVNVQSSNTNK(bi)HMPR_;_HKHHEK(bi)GVNVQSSNTNK(bi)HMPR_;_HK(bi)HHEK(bi)GVNVQSSNTNK(bi)HMPR_	HK(0.461)HHEK(0.539)GVNVQSSNTNK(1)HMPR;HK(0.552)HHEK(0.448)GVNVQSSNTNK(1)HMPR;HK(0.016)HHEK(0.984)GVNVQSSNTNK(1)HMPR;HK(1)HHEK(1)GVNVQSSNTNK(1)HMPR	HK(-0.68)HHEK(0.68)GVNVQSSNTNK(80.33)HMPR;HK(0.91)HHEK(-0.91)GVNVQSSNTNK(47.4)HMPR;HK(-18)HHEK(18)GVNVQSSNTNK(100.01)HMPR;HK(65.89)HHEK(65.89)GVNVQSSNTNK(65.89)HMPR			_HKHHEK(bi)GVNVQSSNTNK(bi)HMPR_;_HK(bi)HHEKGVNVQSSNTNK(bi)HMPR_;_HK(bi)HHEK(bi)GVNVQSSNTNK(bi)HMPR_
PF3D7_0730900	P. falciparum	EMP1-trafficking protein										22.7601		21.6833	21.538	22.4724	20.8956	2 Biotin (K)	0	2			21286000	1.78e-09	137.89	85.021	12	NaN	2	2821.25	30.053	HLTDEENKVEKEMSIHDGMK	222	1	176.665	94.3335	+	NaN	NaN	NaN		1165	1184	_HLTDEENKVEK(bi)EMSIHDGM(ox)K_;_HLTDEENKVEK(bi)EM(ox)SIHDGMK_;_HLTDEENKVEK(bi)EM(ox)SIHDGMK_;_HLTDEENKVEK(bi)EMSIHDGM(ox)K_;_HLTDEENKVEK(bi)EM(ox)SIHDGMK_;_HLTDEENKVEK(bi)EMSIHDGM(ox)K_;_HLTDEENKVEK(bi)EMSIHDGM(ox)K_;_HLTDEENK(bi)VEKEMSIHDGM(ox)K_;_HLTDEENKVEK(bi)EMSIHDGM(ox)K_;_HLTDEENKVEK(bi)EMSIHDGM(ox)K_;_HLTDEENKVEK(bi)EMSIHDGM(ox)K_;_HLTDEENKVEK(bi)EM(ox)SIHDGMK_;_HLTDEENKVEK(bi)EM(ox)SIHDG…	HLTDEENKVEK(1)EMSIHDGMK;HLTDEENK(0.009)VEK(0.986)EMSIHDGMK(0.005);HLTDEENKVEK(0.996)EMSIHDGMK(0.004);HLTDEENKVEK(1)EMSIHDGMK;HLTDEENK(0.009)VEK(0.99)EMSIHDGMK;HLTDEENK(0.001)VEK(0.991)EMSIHDGMK(0.009);HLTDEENKVEK(0.999)EMSIHDGMK(0.001);HLTDEENK(1)VEKEMSIHDGMK;HLTDEENK(0.003)VEK(0.994)EMSIHDGMK(0.003);HLTDEENKVEK(0.999)EMSIHDGMK(0.001);HLTDEENKVEK(1)EMSIHDGMK;HLTDEENKVEK(0.993)EMSIHDGMK(0.007);HLT…	HLTDEENK(-46.72)VEK(46.72)EMSIHDGMK(-49.82);HLTDEENK(-20.38)VEK(20.38)EMSIHDGMK(-24.16);HLTDEENK(-38.49)VEK(26.96)EMSIHDGMK(-26.96);HLTDEENK(-53.11)VEK(52.85)EMSIHDGMK(-52.85);HLTDEENK(-20.24)VEK(20.24)EMSIHDGMK(-38.85);HLTDEENK(-30.69)VEK(20.9)EMSIHDGMK(-20.9);HLTDEENK(-35.02)VEK(35.02)EMSIHDGMK(-35.43);HLTDEENK(71.24)VEK(-71.24)EMSIHDGMK(-112.47);HLTDEENK(-25.26)VEK(25.26)EMSIHDGMK(-27.67);HLTD…			_HLTDEENKVEK(bi)EMSIHDGM(ox)K_;_HLTDEENKVEK(bi)EM(ox)SIHDGMK_;_HLTDEENK(bi)VEKEMSIHDGM(ox)K_;_HLTDEENK(bi)VEKEM(ox)SIHDGMK_;_HLTDEENKVEK(bi)EMSIHDGMK_;_HLTDEENK(bi)VEKEMSIHDGMK_;_HLTDEENKVEK(bi)EM(ox)SIHDGM(ox)K_;_HLTDEENK(bi)VEKEM(ox)SIHDGM(ox)K_;_HLTDEENK(bi)VEK(bi)EMSIHDGMK_
PF3D7_0730900	P. falciparum	EMP1-trafficking protein										25.1449	25.3612	24.8336	25.0148	24.8044	25.1795	2 Biotin (K)	0	2			211380000	9.12e-35	200.4	157.6	22	NaN	3	3134.43	27.213	HLTDEENKVEKEMSIHDGMKGQK	222	NaN	NaN	NaN		NaN	NaN	NaN		1165	1187	_HLTDEENKVEKEM(ox)SIHDGMKGQK(bi)_;_HLTDEENKVEKEMSIHDGM(ox)K(bi)GQK_;_HLTDEENKVEKEMSIHDGM(ox)K(bi)GQK_;_HLTDEENKVEKEMSIHDGM(ox)K(bi)GQK_;_HLTDEENKVEKEM(ox)SIHDGMK(bi)GQK_;_HLTDEENKVEKEMSIHDGM(ox)K(bi)GQK_;_HLTDEENKVEKEM(ox)SIHDGMK(bi)GQK_;_HLTDEENKVEKEMSIHDGM(ox)K(bi)GQK_;_HLTDEENKVEKEM(ox)SIHDGMK(bi)GQK_;_HLTDEENKVEKEM(ox)SIHDGMK(bi)GQK_;_HLTDEENKVEKEMSIHDGM(ox)K(bi)GQK_;_HLTDEENKVEKEMSIHDGM(ox)K…	HLTDEENKVEKEMSIHDGMK(0.436)GQK(0.564);HLTDEENKVEK(0.001)EMSIHDGMK(0.784)GQK(0.215);HLTDEENKVEK(0.001)EMSIHDGMK(0.983)GQK(0.016);HLTDEENKVEKEMSIHDGMK(0.774)GQK(0.226);HLTDEENKVEK(0.002)EMSIHDGMK(0.941)GQK(0.056);HLTDEENKVEK(0.018)EMSIHDGMK(0.767)GQK(0.215);HLTDEENKVEKEMSIHDGMK(0.853)GQK(0.147);HLTDEENKVEK(0.001)EMSIHDGMK(0.929)GQK(0.07);HLTDEENKVEK(0.002)EMSIHDGMK(0.764)GQK(0.234);HLTDEENKVEKEMSIH…	HLTDEENK(-64.33)VEK(-36.93)EMSIHDGMK(-1.11)GQK(1.11);HLTDEENK(-61.09)VEK(-32.12)EMSIHDGMK(5.61)GQK(-5.61);HLTDEENK(-55.3)VEK(-30.61)EMSIHDGMK(17.91)GQK(-17.91);HLTDEENK(-61.97)VEK(-42.68)EMSIHDGMK(5.36)GQK(-5.36);HLTDEENK(-52.16)VEK(-28.69)EMSIHDGMK(12.28)GQK(-12.28);HLTDEENK(-41.37)VEK(-16.36)EMSIHDGMK(5.53)GQK(-5.53);HLTDEENK(-35.4)VEK(-35.4)EMSIHDGMK(7.64)GQK(-7.64);HLTDEENK(-48.47)VEK(-34.2)E…			_HLTDEENKVEKEM(ox)SIHDGMKGQK(bi)_;_HLTDEENKVEKEMSIHDGM(ox)K(bi)GQK_;_HLTDEENKVEKEM(ox)SIHDGMK(bi)GQK_;_HLTDEENKVEKEMSIHDGMK(bi)GQK_;_HLTDEENKVEK(bi)EMSIHDGMKGQK_;_HLTDEENKVEKEM(ox)SIHDGM(ox)K(bi)GQK_;_HLTDEENKVEK(bi)EMSIHDGMK(bi)GQK_;_HLTDEENK(bi)VEKEMSIHDGMK(bi)GQK_;_HLTDEENKVEK(bi)EM(ox)SIHDGMK(bi)GQK_;_HLTDEENK(bi)VEKEMSIHDGM(ox)K(bi)GQK_
PF3D7_1301400	P. falciparum	Plasmodium exported protein (hyp12), unknown function				24.8044	24.5165	23.6971	25.2643	24.8576	24.8142						20.5439	2 Biotin (K)	0	2			168640000	2.81e-18	174.91	122.27	11	3	2	2877.38	41.712	HNANSEYLLDKNLYDLKTFK	373	0.961407	174.91	13.964	+	NaN	NaN	NaN		181	200	_HNANSEYLLDK(bi)NLYDLK(bi)TFK_;_HNANSEYLLDK(bi)NLYDLK(bi)TFK_;_HNANSEYLLDK(bi)NLYDLK(bi)TFK_;_HNANSEYLLDK(bi)NLYDLK(bi)TFK_;_HNANSEYLLDK(bi)NLYDLK(bi)TFK_;_HNANSEYLLDK(bi)NLYDLK(bi)TFK_;_HNANSEYLLDK(bi)NLYDLK(bi)TFK_;_HNANSEYLLDKNLYDLK(bi)TFK_;_HNANSEYLLDKNLYDLK(bi)TFK_;_HNANSEYLLDKNLYDLK(bi)TFK_;_HNANSEYLLDKNLYDLK(bi)TFK_;_HNANSEYLLDKNLYDLK(bi)TFK_;_HNANSEYLLDKNLYDLK(bi)TFK_	HNANSEYLLDK(1)NLYDLK(0.929)TFK(0.071);HNANSEYLLDK(1)NLYDLK(0.941)TFK(0.059);HNANSEYLLDK(1)NLYDLK(0.957)TFK(0.043);HNANSEYLLDK(1)NLYDLK(0.961)TFK(0.039);HNANSEYLLDK(1)NLYDLK(0.949)TFK(0.051);HNANSEYLLDK(1)NLYDLK(0.945)TFK(0.055);HNANSEYLLDK(1)NLYDLK(0.948)TFK(0.052);HNANSEYLLDK(0.001)NLYDLK(0.954)TFK(0.045);HNANSEYLLDK(0.081)NLYDLK(0.883)TFK(0.036);HNANSEYLLDK(0.003)NLYDLK(0.957)TFK(0.04);HNANSEYL…	HNANSEYLLDK(74.21)NLYDLK(11.2)TFK(-11.2);HNANSEYLLDK(55.73)NLYDLK(12.02)TFK(-12.02);HNANSEYLLDK(59.21)NLYDLK(13.52)TFK(-13.52);HNANSEYLLDK(58.82)NLYDLK(13.96)TFK(-13.96);HNANSEYLLDK(64.44)NLYDLK(12.66)TFK(-12.66);HNANSEYLLDK(65.41)NLYDLK(12.33)TFK(-12.33);HNANSEYLLDK(58.61)NLYDLK(12.6)TFK(-12.6);HNANSEYLLDK(-28.3)NLYDLK(13.29)TFK(-13.29);HNANSEYLLDK(-10.36)NLYDLK(10.36)TFK(-13.9);HNANSEYLLDK(-25.…			_HNANSEYLLDK(bi)NLYDLK(bi)TFK_;_HNANSEYLLDKNLYDLK(bi)TFK_
PF3D7_0202000	P. falciparum	knob-associated histidine-rich protein				24.1095	23.9225	23.3778	24.391	23.8288	23.9043							2 Biotin (K)	0	2			97443000	1.94e-05	171.26	115.53	16	NaN	2	1880.93	26.179	HYKLKENVVDGK	117	NaN	NaN	NaN		NaN	NaN	NaN		162	173	_HYK(bi)LKENVVDGK_;_HYK(bi)LKENVVDGK_;_HYK(bi)LKENVVDGK_;_HYK(bi)LKENVVDGK_;_HYK(bi)LKENVVDGK_;_HYKLK(bi)ENVVDGK_;_HYK(bi)LKENVVDGK_;_HYKLK(bi)ENVVDGK_;_HYK(bi)LKENVVDGK_;_HYKLK(bi)ENVVDGK_;_HYK(bi)LKENVVDGK_;_HYKLK(bi)ENVVDGK_;_HYK(bi)LKENVVDGK_;_HYK(bi)LKENVVDGK_;_HYK(bi)LKENVVDGK_;_HYKLK(bi)ENVVDGK_;_HYK(bi)LKENVVDGK_;_HYK(bi)LKENVVDGK_;_HYKLK(bi)ENVVDGK_;_HYK(bi)LKENVVDGK_;_HYK(bi)LKENVVDGK_;…	HYK(0.999)LK(0.001)ENVVDGK;HYK(0.5)LK(0.5)ENVVDGK;HYK(0.997)LK(0.003)ENVVDGK;HYK(0.5)LK(0.5)ENVVDGK;HYK(1)LKENVVDGK;HYK(0.044)LK(0.956)ENVVDGK;HYK(1)LKENVVDGK;HYK(0.186)LK(0.814)ENVVDGK;HYK(0.992)LK(0.008)ENVVDGK;HYK(0.001)LK(0.999)ENVVDGK;HYK(1)LKENVVDGK;HYK(0.09)LK(0.91)ENVVDGK;HYK(0.999)LK(0.001)ENVVDGK;HYK(1)LKENVVDGK;HYK(0.998)LK(0.002)ENVVDGK;HYK(0.011)LK(0.989)ENVVDGK;HYK(1)LKENVVDGK;HYK(0…	HYK(29.1)LK(-29.1)ENVVDGK(-123.27);HYK(0)LK(0)ENVVDGK(-49.03);HYK(24.67)LK(-24.67)ENVVDGK(-93.87);HYK(0)LK(0)ENVVDGK(-76.7);HYK(41.83)LK(-41.83)ENVVDGK(-131.96);HYK(-13.38)LK(13.38)ENVVDGK(-71.22);HYK(47.28)LK(-47.28)ENVVDGK(-137.82);HYK(-6.4)LK(6.4)ENVVDGK(-60.59);HYK(20.96)LK(-20.96)ENVVDGK(-93.68);HYK(-32.53)LK(32.53)ENVVDGK(-128.26);HYK(42.73)LK(-42.73)ENVVDGK(-130.12);HYK(-10.04)LK(10.04)ENV…			_HYK(bi)LKENVVDGK_;_HYKLK(bi)ENVVDGK_;_HYK(bi)LK(bi)ENVVDGK_
PF3D7_0202000	P. falciparum	knob-associated histidine-rich protein				25.9428	25.8694	25.1371	25.0401	25.7645	25.6376	23.1578	23.4425	22.9358	23.7286	22.1325	22.4746	2 Biotin (K)	0	2			359440000	1.03e-14	227.63	171.34	32	NaN	3	2009.02	22.915	HYKLKENVVDGKK	117	1	195.94	175.156	+	NaN	NaN	NaN		162	174	_HYK(bi)LKENVVDGKK_;_HYK(bi)LKENVVDGKK_;_HYK(bi)LKENVVDGKK_;_HYKLK(bi)ENVVDGKK_;_HYK(bi)LKENVVDGKK_;_HYK(bi)LKENVVDGKK_;_HYK(bi)LKENVVDGKK_;_HYKLK(bi)ENVVDGKK_;_HYKLK(bi)ENVVDGKK_;_HYK(bi)LKENVVDGKK_;_HYK(bi)LKENVVDGKK_;_HYK(bi)LKENVVDGKK_;_HYK(bi)LKENVVDGKK_;_HYK(bi)LKENVVDGKK_;_HYK(bi)LKENVVDGKK_;_HYK(bi)LKENVVDGKK_;_HYK(bi)LKENVVDGKK_;_HYK(bi)LKENVVDGKK_;_HYK(bi)LKENVVDGKK_;_HYK(bi)LKENVVDGKK_…	HYK(0.998)LK(0.002)ENVVDGKK;HYK(0.999)LK(0.001)ENVVDGKK;HYK(0.964)LK(0.036)ENVVDGKK;HYK(0.166)LK(0.834)ENVVDGKK;HYK(0.881)LK(0.119)ENVVDGKK;HYK(1)LKENVVDGKK;HYK(0.894)LK(0.106)ENVVDGKK;HYK(0.089)LK(0.911)ENVVDGKK;HYK(0.002)LK(0.998)ENVVDGKK;HYK(0.992)LK(0.008)ENVVDGKK;HYK(0.988)LK(0.012)ENVVDGKK;HYK(0.959)LK(0.041)ENVVDGKK;HYK(1)LKENVVDGKK;HYK(0.952)LK(0.048)ENVVDGKK;HYK(0.995)LK(0.005)ENVVDGKK;H…	HYK(27.6)LK(-27.6)ENVVDGK(-143)K(-153.66);HYK(29.75)LK(-29.75)ENVVDGK(-152)K(-161.95);HYK(14.29)LK(-14.29)ENVVDGK(-124.79)K(-138.31);HYK(-7.02)LK(7.02)ENVVDGK(-120.14)K(-136);HYK(8.7)LK(-8.7)ENVVDGK(-59.29)K(-63.72);HYK(42.37)LK(-42.37)ENVVDGK(-107.66)K(-114.48);HYK(9.25)LK(-9.25)ENVVDGK(-93.56)K(-109.94);HYK(-10.1)LK(10.1)ENVVDGK(-98.29)K(-111.15);HYK(-27.04)LK(27.04)ENVVDGK(-108.93)K(-124.59);H…			_HYK(bi)LKENVVDGKK_;_HYKLK(bi)ENVVDGKK_;_HYK(bi)LK(bi)ENVVDGKK_
PF3D7_1477500	P. falciparum	Plasmodium exported protein (PHISTb), unknown function						19.9553		20.9584								2 Biotin (K)	0	2			3054100	4.59e-05	161.25	82.913	4	2	2	1786.93	34.618	IKSKGGNPLFFK	467	1	161.25	143.668	+	NaN	NaN	NaN		325	336	_IK(bi)SK(bi)GGNPLFFK_;_IK(bi)SK(bi)GGNPLFFK_;_IK(bi)SK(bi)GGNPLFFK_	IK(1)SK(1)GGNPLFFK;IK(1)SK(1)GGNPLFFK;IK(1)SK(1)GGNPLFFK	IK(94.95)SK(70.16)GGNPLFFK(-70.16);IK(116.78)SK(94.66)GGNPLFFK(-94.66);IK(143.67)SK(118.83)GGNPLFFK(-118.83)			_IK(bi)SK(bi)GGNPLFFK_
PF3D7_0401800	P. falciparum	Plasmodium exported protein (PHISTb), unknown function				26.3861	25.7312	25.4892	26.2151	25.7492	25.5075							2 Biotin (K)	0	2			372530000	2.8e-08	197.19	123.36	21	NaN	2	2201.04	26.589	ILCYCASKNKSLHR	145	NaN	NaN	NaN		NaN	NaN	NaN		473	486	_ILCYCASK(bi)NK(bi)SLHR_;_ILCYCASK(bi)NK(bi)SLHR_;_ILCYCASK(bi)NK(bi)SLHR_;_ILCYCASK(bi)NK(bi)SLHR_;_ILCYCASK(bi)NK(bi)SLHR_;_ILCYCASK(bi)NK(bi)SLHR_;_ILCYCASK(bi)NK(bi)SLHR_;_ILCYCASK(bi)NK(bi)SLHR_;_ILCYCASK(bi)NK(bi)SLHR_;_ILCYCASK(bi)NK(bi)SLHR_;_ILCYCASK(bi)NK(bi)SLHR_;_ILCYCASK(bi)NK(bi)SLHR_	ILCYCASK(1)NK(1)SLHR;ILCYCASK(1)NK(1)SLHR;ILCYCASK(1)NK(1)SLHR;ILCYCASK(1)NK(1)SLHR;ILCYCASK(1)NK(1)SLHR;ILCYCASK(1)NK(1)SLHR;ILCYCASK(1)NK(1)SLHR;ILCYCASK(1)NK(1)SLHR;ILCYCASK(1)NK(1)SLHR;ILCYCASK(1)NK(1)SLHR;ILCYCASK(1)NK(1)SLHR	ILCYCASK(154.1)NK(154.1)SLHR;ILCYCASK(171.76)NK(171.76)SLHR;ILCYCASK(130.61)NK(130.61)SLHR;ILCYCASK(143.05)NK(143.05)SLHR;ILCYCASK(130.61)NK(130.61)SLHR;ILCYCASK(145.43)NK(145.43)SLHR;ILCYCASK(124.42)NK(124.42)SLHR;ILCYCASK(197.19)NK(197.19)SLHR;ILCYCASK(150.26)NK(150.26)SLHR;ILCYCASK(160.78)NK(160.78)SLHR;ILCYCASK(146.59)NK(146.59)SLHR			_ILCYCASK(bi)NK(bi)SLHR_
PF3D7_0702500	P. falciparum	Plasmodium exported protein, unknown function								20.9187	20.6836							2 Biotin (K)	0	2			3666600	0.0050637	114.24	31.979	1	2	2	1626.86	25.023	ILKSSSVTKGR	202	1	114.24	114.239	+	NaN	NaN	NaN		61	71	_ILK(bi)SSSVTK(bi)GR_;_ILK(bi)SSSVTK(bi)GR_	ILK(1)SSSVTK(1)GR	ILK(114.24)SSSVTK(114.24)GR			_ILK(bi)SSSVTK(bi)GR_
PF3D7_0500800	P. falciparum	mature parasite-infected erythrocyte surface antigen				23.1203	23.4923	22.6097	23.8764	23.6649	23.3778							2 Biotin (K)	0	2			66960000	7.6e-07	119.27	88.917	17	4	3	3414.69	36.162	ILYNLFLEYNPHMNNKQKAELDKK	159	0.995434	118.36	26.7164	+	NaN	NaN	NaN		1356	1379	_ILYNLFLEYNPHMNNKQKAELDK(bi)K_;_ILYNLFLEYNPHMNNKQKAELDK(bi)K_;_ILYNLFLEYNPHMNNK(bi)QKAELDKK_;_ILYNLFLEYNPHMNNKQKAELDK(bi)K_;_ILYNLFLEYNPHMNNK(bi)QKAELDKK_;_ILYNLFLEYNPHMNNKQKAELDK(bi)K_;_ILYNLFLEYNPHMNNKQKAELDK(bi)K_;_ILYNLFLEYNPHMNNKQKAELDK(bi)K_;_ILYNLFLEYNPHMNNKQKAELDK(bi)K_;_ILYNLFLEYNPHMNNKQKAELDK(bi)K_;_ILYNLFLEYNPHMNNKQK(bi)AELDKK_;_ILYNLFLEYNPHMNNKQKAELDK(bi)K_;_ILYNLFLEYNPHMNNKQKAELDK(bi…	ILYNLFLEYNPHMNNK(0.245)QK(0.181)AELDK(0.287)K(0.287);ILYNLFLEYNPHMNNK(0.005)QK(0.021)AELDK(0.487)K(0.487);ILYNLFLEYNPHMNNK(0.29)QK(0.205)AELDK(0.252)K(0.252);ILYNLFLEYNPHMNNK(0.074)QK(0.074)AELDK(0.426)K(0.426);ILYNLFLEYNPHMNNK(0.461)QK(0.461)AELDK(0.039)K(0.039);ILYNLFLEYNPHMNNK(0.182)QK(0.182)AELDK(0.318)K(0.318);ILYNLFLEYNPHMNNK(0.228)QK(0.228)AELDK(0.272)K(0.272);ILYNLFLEYNPHMNNK(0.129)QK(0.1…	ILYNLFLEYNPHMNNK(-0.68)QK(-2)AELDK(0)K(0);ILYNLFLEYNPHMNNK(-19.69)QK(-13.67)AELDK(0)K(0);ILYNLFLEYNPHMNNK(0.61)QK(-1.51)AELDK(-0.61)K(-0.61);ILYNLFLEYNPHMNNK(-7.57)QK(-7.57)AELDK(0)K(0);ILYNLFLEYNPHMNNK(0)QK(0)AELDK(-10.67)K(-10.67);ILYNLFLEYNPHMNNK(-2.44)QK(-2.44)AELDK(0)K(0);ILYNLFLEYNPHMNNK(-0.77)QK(-0.77)AELDK(0)K(0);ILYNLFLEYNPHMNNK(-5.68)QK(-5.68)AELDK(2.61)K(-2.61);ILYNLFLEYNPHMNNK(-7.56)Q…			_ILYNLFLEYNPHMNNKQKAELDK(bi)K_;_ILYNLFLEYNPHMNNK(bi)QKAELDKK_;_ILYNLFLEYNPHMNNKQK(bi)AELDKK_;_ILYNLFLEYNPHMNNK(bi)QK(bi)AELDKK_;_ILYNLFLEYNPHM(ox)NNKQK(bi)AELDKK_;_ILYNLFLEYNPHM(ox)NNK(bi)QKAELDKK_;_ILYNLFLEYNPHM(ox)NNKQKAELDK(bi)K_;_ILYNLFLEYNPHM(ox)NNK(bi)QK(bi)AELDKK_
PF3D7_0500800	P. falciparum	mature parasite-infected erythrocyte surface antigen				21.944	22.5914	21.3143	21.9589	22.4207								2 Biotin (K)	0	2			22653000	3.81e-12	184.02	128.04	7	3	2	2372.12	40.208	IYEETKYNKITSEFR	159	NaN	NaN	NaN		NaN	NaN	NaN		308	322	_IYEETKYNK(bi)ITSEFR_;_IYEETKYNK(bi)ITSEFR_;_IYEETKYNK(bi)ITSEFR_;_IYEETK(bi)YNKITSEFR_;_IYEETKYNK(bi)ITSEFR_;_IYEETKYNK(bi)ITSEFR_;_IYEETKYNK(bi)ITSEFR_;_IYEETK(bi)YNKITSEFR_;_IYEETKYNK(bi)ITSEFR_;_IYEETKYNK(bi)ITSEFR_;_IYEETKYNK(bi)ITSEFR_;_IYEETK(bi)YNKITSEFR_;_IYEETKYNK(bi)ITSEFR_;_IYEETKYNK(bi)ITSEFR_;_IYEETKYNK(bi)ITSEFR_;_IYEETK(bi)YNKITSEFR_;_IYEETKYNK(bi)ITSEFR_;_IYEETKYNK(bi)ITSEFR_;_IY…	IYEETKYNK(1)ITSEFR;IYEETKYNK(1)ITSEFR;IYEETKYNK(1)ITSEFR;IYEETK(0.831)YNK(0.169)ITSEFR;IYEETKYNK(1)ITSEFR;IYEETKYNK(1)ITSEFR;IYEETK(0.002)YNK(0.998)ITSEFR;IYEETK(0.902)YNK(0.098)ITSEFR;IYEETK(0.021)YNK(0.979)ITSEFR;IYEETKYNK(1)ITSEFR;IYEETK(0.001)YNK(0.999)ITSEFR;IYEETK(0.5)YNK(0.5)ITSEFR;IYEETKYNK(1)ITSEFR;IYEETKYNK(1)ITSEFR;IYEETK(0.003)YNK(0.997)ITSEFR;IYEETK(0.943)YNK(0.057)ITSEFR;IYEETKYNK(1…	IYEETK(-37.39)YNK(37.39)ITSEFR;IYEETK(-48.43)YNK(48.43)ITSEFR;IYEETK(-42.23)YNK(42.23)ITSEFR;IYEETK(6.93)YNK(-6.93)ITSEFR;IYEETK(-34.1)YNK(34.1)ITSEFR;IYEETK(-60.46)YNK(60.46)ITSEFR;IYEETK(-27.52)YNK(27.52)ITSEFR;IYEETK(9.62)YNK(-9.62)ITSEFR;IYEETK(-16.69)YNK(16.69)ITSEFR;IYEETK(-53.13)YNK(53.13)ITSEFR;IYEETK(-30.89)YNK(30.89)ITSEFR;IYEETK(0)YNK(0)ITSEFR;IYEETK(-43.7)YNK(43.7)ITSEFR;IYEETK(-57.44…			_IYEETKYNK(bi)ITSEFR_;_IYEETK(bi)YNKITSEFR_;_IYEETK(bi)YNK(bi)ITSEFR_
PF3D7_0500800	P. falciparum	mature parasite-infected erythrocyte surface antigen				23.632	24.5522	22.4919	23.8576	24.1095	23.8481							2 Biotin (K)	0	2			91907000	2.44e-11	142.84	84.125	15	3	3	3072.46	38.447	IYEETKYNKITSEFRETENVK	159	1	123	106.623	+	NaN	NaN	NaN		308	328	_IYEETKYNK(bi)ITSEFRETENVK_;_IYEETKYNK(bi)ITSEFRETENVK_;_IYEETK(bi)YNKITSEFRETENVK_;_IYEETKYNK(bi)ITSEFRETENVK_;_IYEETK(bi)YNKITSEFRETENVK_;_IYEETK(bi)YNKITSEFRETENVK_;_IYEETKYNK(bi)ITSEFRETENVK_;_IYEETKYNK(bi)ITSEFRETENVK_;_IYEETKYNK(bi)ITSEFRETENVK_;_IYEETKYNK(bi)ITSEFRETENVK_;_IYEETKYNK(bi)ITSEFRETENVK_;_IYEETK(bi)YNKITSEFRETENVK_;_IYEETK(bi)YNKITSEFRETENVK_;_IYEETKYNK(bi)ITSEFRETENVK_;_IYEETK…	IYEETK(0.008)YNK(0.992)ITSEFRETENVK;IYEETKYNK(1)ITSEFRETENVK;IYEETK(0.939)YNK(0.061)ITSEFRETENVK;IYEETKYNK(1)ITSEFRETENVK;IYEETK(0.787)YNK(0.213)ITSEFRETENVK;IYEETK(0.896)YNK(0.103)ITSEFRETENVK;IYEETK(0.079)YNK(0.921)ITSEFRETENVK;IYEETK(0.001)YNK(0.999)ITSEFRETENVK;IYEETK(0.229)YNK(0.771)ITSEFRETENVK;IYEETK(0.006)YNK(0.994)ITSEFRETENVK;IYEETKYNK(1)ITSEFRETENVK;IYEETK(0.807)YNK(0.193)ITSEFRETENVK;…	IYEETK(-20.75)YNK(20.75)ITSEFRETENVK(-54.61);IYEETK(-48.08)YNK(48.08)ITSEFRETENVK(-116.38);IYEETK(11.87)YNK(-11.87)ITSEFRETENVK(-70.14);IYEETK(-41.84)YNK(41.84)ITSEFRETENVK(-106.08);IYEETK(5.68)YNK(-5.68)ITSEFRETENVK(-56.5);IYEETK(9.38)YNK(-9.38)ITSEFRETENVK(-37.43);IYEETK(-10.68)YNK(10.68)ITSEFRETENVK(-79.57);IYEETK(-30.55)YNK(30.55)ITSEFRETENVK(-69.36);IYEETK(-5.26)YNK(5.26)ITSEFRETENVK(-62.1);…			_IYEETKYNK(bi)ITSEFRETENVK_;_IYEETK(bi)YNKITSEFRETENVK_;_IYEETK(bi)YNK(bi)ITSEFRETENVK_
PF3D7_0730900	P. falciparum	EMP1-trafficking protein										25.1757	25.0608	24.5165	24.8811	24.7746	24.7182	2 Biotin (K)	0	2			183950000	1.45e-23	157.55	108.95	56	NaN	3	3885.78	35.65	IYVSEFKNNDDEGINKESYTTKSYVSEFK	222	NaN	NaN	NaN		NaN	NaN	NaN		504	532	_IYVSEFKNNDDEGINKESYTTK(bi)SYVSEFK_;_IYVSEFKNNDDEGINKESYTTK(bi)SYVSEFK_;_IYVSEFKNNDDEGINKESYTTK(bi)SYVSEFK_;_IYVSEFKNNDDEGINKESYTTK(bi)SYVSEFK_;_IYVSEFKNNDDEGINKESYTTK(bi)SYVSEFK_;_IYVSEFKNNDDEGINKESYTTK(bi)SYVSEFK_;_IYVSEFKNNDDEGINKESYTTK(bi)SYVSEFK_;_IYVSEFKNNDDEGINKESYTTK(bi)SYVSEFK_;_IYVSEFKNNDDEGINKESYTTK(bi)SYVSEFK_;_IYVSEFKNNDDEGINKESYTTK(bi)SYVSEFK_;_IYVSEFKNNDDEGINKESYTTK(bi)SYVSEFK_;_IY…	IYVSEFKNNDDEGINKESYTTK(0.999)SYVSEFK(0.001);IYVSEFKNNDDEGINKESYTTK(1)SYVSEFK;IYVSEFKNNDDEGINKESYTTK(1)SYVSEFK;IYVSEFKNNDDEGINKESYTTK(1)SYVSEFK;IYVSEFKNNDDEGINKESYTTK(1)SYVSEFK;IYVSEFKNNDDEGINKESYTTK(1)SYVSEFK;IYVSEFKNNDDEGINKESYTTK(1)SYVSEFK;IYVSEFKNNDDEGINKESYTTK(0.999)SYVSEFK(0.001);IYVSEFKNNDDEGINKESYTTK(1)SYVSEFK;IYVSEFKNNDDEGINKESYTTK(1)SYVSEFK;IYVSEFKNNDDEGINKESYTTK(0.992)SYVSEFK(0.008);IYV…	IYVSEFK(-79.13)NNDDEGINK(-66.08)ESYTTK(32.73)SYVSEFK(-32.73);IYVSEFK(-64.96)NNDDEGINK(-57.79)ESYTTK(33.54)SYVSEFK(-33.54);IYVSEFK(-74.27)NNDDEGINK(-63.42)ESYTTK(34.08)SYVSEFK(-34.08);IYVSEFK(-94.05)NNDDEGINK(-50.34)ESYTTK(41.34)SYVSEFK(-41.34);IYVSEFK(-89.69)NNDDEGINK(-77.27)ESYTTK(46.14)SYVSEFK(-46.14);IYVSEFK(-73.09)NNDDEGINK(-54.07)ESYTTK(42.74)SYVSEFK(-42.74);IYVSEFK(-108.8)NNDDEGINK(-86.2)ES…			_IYVSEFKNNDDEGINKESYTTK(bi)SYVSEFK_;_IYVSEFKNNDDEGINK(bi)ESYTTK(bi)SYVSEFK_;_IYVSEFK(bi)NNDDEGINKESYTTK(bi)SYVSEFK_
PF3D7_0730900	P. falciparum	EMP1-trafficking protein										22.7346	23.2202	22.6651	22.4619	23.1919	23.48	2 Biotin (K)	0	2			50433000	2.42e-22	224.06	91.753	13	3	2	2475.11	28.676	KFVQEFKSNTHDGMNNK	222	1	207.92	145.294	+	NaN	NaN	NaN		305	321	_KFVQEFK(bi)SNTHDGM(ox)NNK_;_KFVQEFK(bi)SNTHDGM(ox)NNK_;_KFVQEFK(bi)SNTHDGM(ox)NNK_;_KFVQEFK(bi)SNTHDGM(ox)NNK_;_KFVQEFK(bi)SNTHDGM(ox)NNK_;_KFVQEFK(bi)SNTHDGM(ox)NNK_;_KFVQEFK(bi)SNTHDGM(ox)NNK_;_KFVQEFK(bi)SNTHDGM(ox)NNK_;_KFVQEFK(bi)SNTHDGM(ox)NNK_;_KFVQEFK(bi)SNTHDGM(ox)NNK_;_KFVQEFK(bi)SNTHDGM(ox)NNK_;_KFVQEFK(bi)SNTHDGM(ox)NNK_;_K(bi)FVQEFK(bi)SNTHDGMNNK_;_K(bi)FVQEFK(bi)SNTHDGMNNK_;_K(bi)F…	K(0.068)FVQEFK(0.931)SNTHDGMNNK(0.001);KFVQEFK(1)SNTHDGMNNK;K(0.22)FVQEFK(0.78)SNTHDGMNNK;K(0.001)FVQEFK(0.998)SNTHDGMNNK(0.001);K(0.005)FVQEFK(0.992)SNTHDGMNNK(0.003);K(0.009)FVQEFK(0.991)SNTHDGMNNK;K(0.007)FVQEFK(0.99)SNTHDGMNNK(0.003);K(1)FVQEFK(1)SNTHDGMNNK;K(1)FVQEFK(1)SNTHDGMNNK;K(1)FVQEFK(1)SNTHDGMNNK;K(1)FVQEFK(1)SNTHDGMNNK;K(1)FVQEFK(1)SNTHDGMNNK;K(1)FVQEFK(1)SNTHDGMNNK;K(1)FVQEFK(1)SNTH…	K(-11.37)FVQEFK(11.37)SNTHDGMNNK(-32.17);K(-47.74)FVQEFK(45.71)SNTHDGMNNK(-45.71);K(-5.5)FVQEFK(5.5)SNTHDGMNNK(-46.31);K(-32.43)FVQEFK(29.65)SNTHDGMNNK(-29.65);K(-22.93)FVQEFK(22.93)SNTHDGMNNK(-25.49);K(-20.42)FVQEFK(20.42)SNTHDGMNNK(-43.21);K(-21.47)FVQEFK(21.47)SNTHDGMNNK(-24.68);K(168.96)FVQEFK(91.37)SNTHDGMNNK(-91.37);K(170.65)FVQEFK(82.28)SNTHDGMNNK(-82.28);K(206.33)FVQEFK(105.87)SNTHDGMNNK(…			_KFVQEFK(bi)SNTHDGM(ox)NNK_;_K(bi)FVQEFK(bi)SNTHDGMNNK_;_KFVQEFK(bi)SNTHDGMNNK_;_K(bi)FVQEFK(bi)SNTHDGM(ox)NNK_
PF3D7_0730900	P. falciparum	EMP1-trafficking protein												21.0552				2 Biotin (K)	0	2			2178900	0.00059466	71.097	35.869	1	4	3	3740.79	27.128	KFVQEFKSNTHDGMNNKVNTTNNAPNVIK	222	NaN	NaN	NaN		NaN	NaN	NaN		305	333	_KFVQEFK(bi)SNTHDGMNNKVNTTNNAPNVIK_;_KFVQEFK(bi)SNTHDGMNNKVNTTNNAPNVIK_;_KFVQEFK(bi)SNTHDGMNNKVNTTNNAPNVIK_;_KFVQEFK(bi)SNTHDGMNNKVNTTNNAPNVIK_;_KFVQEFK(bi)SNTHDGMNNKVNTTNNAPNVIK_;_KFVQEFK(bi)SNTHDGMNNKVNTTNNAPNVIK_;_KFVQEFK(bi)SNTHDGMNNKVNTTNNAPNVIK_;_KFVQEFK(bi)SNTHDGMNNKVNTTNNAPNVIK_;_KFVQEFK(bi)SNTHDGMNNKVNTTNNAPNVIK_;_KFVQEFK(bi)SNTHDGMNNK(bi)VNTTNNAPNVIK_	K(0.146)FVQEFK(0.854)SNTHDGMNNKVNTTNNAPNVIK;K(0.139)FVQEFK(0.852)SNTHDGMNNK(0.009)VNTTNNAPNVIK;K(0.003)FVQEFK(0.997)SNTHDGMNNKVNTTNNAPNVIK;K(0.001)FVQEFK(0.998)SNTHDGMNNK(0.001)VNTTNNAPNVIK;K(0.002)FVQEFK(0.995)SNTHDGMNNK(0.003)VNTTNNAPNVIK;K(0.002)FVQEFK(0.998)SNTHDGMNNKVNTTNNAPNVIK;K(0.002)FVQEFK(0.997)SNTHDGMNNKVNTTNNAPNVIK;K(0.025)FVQEFK(0.989)SNTHDGMNNK(0.986)VNTTNNAPNVIK	K(-7.66)FVQEFK(7.66)SNTHDGMNNK(-37.89)VNTTNNAPNVIK(-67.62);K(-7.87)FVQEFK(7.87)SNTHDGMNNK(-19.84)VNTTNNAPNVIK(-50.15);K(-25.11)FVQEFK(25.11)SNTHDGMNNK(-38.41)VNTTNNAPNVIK(-86.18);K(-29.23)FVQEFK(29.23)SNTHDGMNNK(-29.23)VNTTNNAPNVIK(-81.1);K(-27.1)FVQEFK(25.27)SNTHDGMNNK(-25.27)VNTTNNAPNVIK(-62.26);K(-27.25)FVQEFK(27.25)SNTHDGMNNK(-46.22)VNTTNNAPNVIK(-71.14);K(-26.15)FVQEFK(26.15)SNTHDGMNNK(-36.71…			_KFVQEFK(bi)SNTHDGMNNKVNTTNNAPNVIK_;_KFVQEFK(bi)SNTHDGMNNK(bi)VNTTNNAPNVIK_
PF3D7_0730900	P. falciparum	EMP1-trafficking protein										23.6209	23.5869	22.7476	23.3376	23.4676	23.5285	2 Biotin (K)	0	2			66934000	1.91e-14	193.64	123.38	26	NaN	2	2390.11	37.192	KFVSELKSNTYSYMNK	222	NaN	NaN	NaN		NaN	NaN	NaN		988	1003	_KFVSELK(bi)SNTYSYMNK_;_KFVSELK(bi)SNTYSYMNK_;_KFVSELK(bi)SNTYSYMNK_;_KFVSELK(bi)SNTYSYMNK_;_KFVSELK(bi)SNTYSYMNK_;_KFVSELK(bi)SNTYSYMNK_;_K(bi)FVSELK(bi)SNTYSYMNK_;_K(bi)FVSELK(bi)SNTYSYMNK_;_K(bi)FVSELK(bi)SNTYSYMNK_;_K(bi)FVSELK(bi)SNTYSYMNK_;_K(bi)FVSELK(bi)SNTYSYMNK_;_K(bi)FVSELK(bi)SNTYSYMNK_;_K(bi)FVSELK(bi)SNTYSYMNK_;_K(bi)FVSELK(bi)SNTYSYMNK_;_K(bi)FVSELK(bi)SNTYSYMNK_;_K(bi)FVSELK(bi)SN…	KFVSELK(1)SNTYSYMNK;KFVSELK(1)SNTYSYMNK;KFVSELK(1)SNTYSYMNK;K(0.186)FVSELK(0.814)SNTYSYMNK;K(0.058)FVSELK(0.942)SNTYSYMNK;K(0.002)FVSELK(0.998)SNTYSYMNK;K(1)FVSELK(1)SNTYSYMNK;K(1)FVSELK(1)SNTYSYMNK;K(1)FVSELK(1)SNTYSYMNK;K(1)FVSELK(1)SNTYSYMNK;K(1)FVSELK(1)SNTYSYMNK;K(1)FVSELK(1)SNTYSYMNK;K(1)FVSELK(1)SNTYSYMNK;K(1)FVSELK(1)SNTYSYMNK;K(1)FVSELK(1)SNTYSYMNK;K(1)FVSELK(1)SNTYSYMNK;K(1)FVSELK(1)SNT…	K(-45.33)FVSELK(45.33)SNTYSYMNK(-147.81);K(-42.29)FVSELK(42.29)SNTYSYMNK(-145.31);K(-44.73)FVSELK(44.73)SNTYSYMNK(-122.15);K(-6.41)FVSELK(6.41)SNTYSYMNK(-110.38);K(-12.11)FVSELK(12.11)SNTYSYMNK(-131.26);K(-27.2)FVSELK(27.2)SNTYSYMNK(-109.42);K(132.89)FVSELK(93.95)SNTYSYMNK(-93.95);K(165.19)FVSELK(77.02)SNTYSYMNK(-77.02);K(158.71)FVSELK(101.94)SNTYSYMNK(-101.94);K(125.91)FVSELK(64.62)SNTYSYMNK(-64…			_KFVSELK(bi)SNTYSYMNK_;_K(bi)FVSELK(bi)SNTYSYMNK_;_K(bi)FVSELK(bi)SNTYSYM(ox)NK_
PF3D7_0730900	P. falciparum	EMP1-trafficking protein					20.6592					24.3578	24.4676	24.0691	23.7695	24.2096	24.3031	2 Biotin (K)	0	2			118360000	1.7e-16	158.02	113.97	30	NaN	3	3116.46	32.727	KFVSELKSNTYSYMNKNPYSHK	222	NaN	NaN	NaN		NaN	NaN	NaN		988	1009	_K(bi)FVSELK(bi)SNTYSYMNKNPYSHK_;_KFVSELK(bi)SNTYSYMNK(bi)NPYSHK_;_K(bi)FVSELK(bi)SNTYSYMNKNPYSHK_;_KFVSELK(bi)SNTYSYMNK(bi)NPYSHK_;_K(bi)FVSELK(bi)SNTYSYMNKNPYSHK_;_KFVSELK(bi)SNTYSYMNK(bi)NPYSHK_;_KFVSELK(bi)SNTYSYMNK(bi)NPYSHK_;_K(bi)FVSELK(bi)SNTYSYMNKNPYSHK_;_KFVSELK(bi)SNTYSYMNK(bi)NPYSHK_;_K(bi)FVSELK(bi)SNTYSYMNKNPYSHK_;_KFVSELK(bi)SNTYSYMNK(bi)NPYSHK_;_K(bi)FVSELK(bi)SNTYSYMNKNPYSHK_;_K(…	K(1)FVSELK(0.999)SNTYSYMNK(0.001)NPYSHK;K(0.442)FVSELK(0.558)SNTYSYMNK(1)NPYSHK;K(1)FVSELK(1)SNTYSYMNKNPYSHK;K(0.066)FVSELK(0.934)SNTYSYMNK(0.998)NPYSHK(0.002);K(1)FVSELK(1)SNTYSYMNKNPYSHK;KFVSELK(1)SNTYSYMNK(1)NPYSHK;K(0.001)FVSELK(0.999)SNTYSYMNK(0.998)NPYSHK(0.002);K(1)FVSELK(1)SNTYSYMNKNPYSHK;K(0.024)FVSELK(0.976)SNTYSYMNK(1)NPYSHK;K(1)FVSELK(1)SNTYSYMNKNPYSHK;K(0.004)FVSELK(0.996)SNTYSYMNK(1…	K(44.42)FVSELK(30.55)SNTYSYMNK(-30.55)NPYSHK(-37.16);K(-1.01)FVSELK(1.01)SNTYSYMNK(44.69)NPYSHK(-44.69);K(119.33)FVSELK(87.39)SNTYSYMNK(-87.39)NPYSHK(-102.02);K(-11.54)FVSELK(11.54)SNTYSYMNK(26.75)NPYSHK(-26.75);K(91.94)FVSELK(64.75)SNTYSYMNK(-64.75)NPYSHK(-82.15);K(-36.64)FVSELK(36.64)SNTYSYMNK(36.21)NPYSHK(-36.21);K(-29.42)FVSELK(29.42)SNTYSYMNK(27.19)NPYSHK(-27.19);K(98.82)FVSELK(64.23)SNTYSYM…			_K(bi)FVSELK(bi)SNTYSYMNKNPYSHK_;_KFVSELK(bi)SNTYSYMNK(bi)NPYSHK_;_K(bi)FVSELKSNTYSYMNK(bi)NPYSHK_;_KFVSELK(bi)SNTYSYMNKNPYSHK_;_K(bi)FVSELK(bi)SNTYSYMNK(bi)NPYSHK_
PF3D7_0730900	P. falciparum	EMP1-trafficking protein										23.5983	23.7286	23.3101	23.5869	23.5638	23.6865	2 Biotin (K)	0	2			75453000	1.1e-25	154.34	113.35	15	4	3	3915.75	28.994	KGCTVHEIGFMDDDNRNTMNDTTPNVNLKK	222	0.541685	87.052	0.732327	+	NaN	NaN	NaN		1712	1741	_K(bi)GCTVHEIGFMDDDNRNTMNDTTPNVNLKK_;_K(bi)GCTVHEIGFMDDDNRNTMNDTTPNVNLKK_;_K(bi)GCTVHEIGFMDDDNRNTMNDTTPNVNLKK_;_K(bi)GCTVHEIGFMDDDNRNTMNDTTPNVNLKK_;_K(bi)GCTVHEIGFMDDDNRNTMNDTTPNVNLKK_;_K(bi)GCTVHEIGFMDDDNRNTMNDTTPNVNLKK_;_K(bi)GCTVHEIGFMDDDNRNTMNDTTPNVNLKK_;_K(bi)GCTVHEIGFMDDDNRNTMNDTTPNVNLKK_;_K(bi)GCTVHEIGFMDDDNRNTMNDTTPNVNLKK_;_K(bi)GCTVHEIGFMDDDNRNTMNDTTPNVNLKK_;_K(bi)GCTVHEIGFMDDDNRNTMNDTTP…	K(1)GCTVHEIGFMDDDNRNTMNDTTPNVNLKK;K(1)GCTVHEIGFMDDDNRNTMNDTTPNVNLKK;K(1)GCTVHEIGFMDDDNRNTMNDTTPNVNLKK;K(1)GCTVHEIGFMDDDNRNTMNDTTPNVNLKK;K(1)GCTVHEIGFMDDDNRNTMNDTTPNVNLKK;K(1)GCTVHEIGFMDDDNRNTMNDTTPNVNLKK;K(1)GCTVHEIGFMDDDNRNTMNDTTPNVNLKK;K(1)GCTVHEIGFMDDDNRNTMNDTTPNVNLKK;K(1)GCTVHEIGFMDDDNRNTMNDTTPNVNLKK;K(1)GCTVHEIGFMDDDNRNTMNDTTPNVNLKK;K(1)GCTVHEIGFMDDDNRNTMNDTTPNVNLKK;K(1)GCTVHEIGFMDDDNRNTMNDT…	K(118.74)GCTVHEIGFMDDDNRNTMNDTTPNVNLK(-118.74)K(-118.99);K(78.74)GCTVHEIGFMDDDNRNTMNDTTPNVNLK(-78.74)K(-78.74);K(93.43)GCTVHEIGFMDDDNRNTMNDTTPNVNLK(-93.43)K(-93.43);K(56.27)GCTVHEIGFMDDDNRNTMNDTTPNVNLK(-56.27)K(-56.27);K(41.12)GCTVHEIGFMDDDNRNTMNDTTPNVNLK(-41.12)K(-41.12);K(82.31)GCTVHEIGFMDDDNRNTMNDTTPNVNLK(-82.31)K(-82.31);K(68.26)GCTVHEIGFMDDDNRNTMNDTTPNVNLK(-68.26)K(-68.26);K(50.5)GCTVHEIGFMD…			_K(bi)GCTVHEIGFMDDDNRNTMNDTTPNVNLKK_;_K(bi)GCTVHEIGFMDDDNRNTM(ox)NDTTPNVNLKK_;_K(bi)GCTVHEIGFM(ox)DDDNRNTMNDTTPNVNLKK_;_K(bi)GCTVHEIGFM(ox)DDDNRNTMNDTTPNVNLKK(bi)_;_K(bi)GCTVHEIGFM(ox)DDDNRNTMNDTTPNVNLK(bi)K_;_K(bi)GCTVHEIGFMDDDNRNTMNDTTPNVNLKK(bi)_;_K(bi)GCTVHEIGFMDDDNRNTMNDTTPNVNLK(bi)K_
PF3D7_0905400	P. falciparum	high molecular weight rhoptry protein 3				22.3376	22.9444	21.9834	21.7351	21.4776	21.101							2 Biotin (K)	0	2			26178000	0.0017877	187.11	116.67	1	2	2	1750.88	35.662	KGLEFYKSSLK	253	1	161.75	80.1278	+	NaN	NaN	NaN		846	856	_KGLEFYK(bi)SSLK_;_KGLEFYK(bi)SSLK_;_KGLEFYK(bi)SSLK_;_KGLEFYK(bi)SSLK_;_KGLEFYK(bi)SSLK_;_KGLEFYK(bi)SSLK_;_KGLEFYK(bi)SSLK_;_KGLEFYK(bi)SSLK_;_KGLEFYK(bi)SSLK_;_KGLEFYK(bi)SSLK_;_KGLEFYK(bi)SSLK_;_KGLEFYK(bi)SSLK_;_KGLEFYK(bi)SSLK_;_KGLEFYK(bi)SSLK_;_K(bi)GLEFYK(bi)SSLK_;_K(bi)GLEFYK(bi)SSLK_;_K(bi)GLEFYK(bi)SSLK_;_K(bi)GLEFYK(bi)SSLK_;_K(bi)GLEFYK(bi)SSLK_;_K(bi)GLEFYK(bi)SSLK_;_K(bi)GLEFYKS(p…	KGLEFYK(1)SSLK;K(0.005)GLEFYK(0.995)SSLK;KGLEFYK(1)SSLK;KGLEFYK(1)SSLK;K(1)GLEFYK(1)SSLK;K(1)GLEFYKSSLK;K(1)GLEFYKSSLK	K(-68.45)GLEFYK(38.28)SSLK(-38.28);K(-23.13)GLEFYK(23.13)SSLK(-56.35);K(-52.88)GLEFYK(45.92)SSLK(-45.92);K(-48.33)GLEFYK(47.94)SSLK(-47.94);K(175.61)GLEFYK(75.8)SSLK(-75.8);K(84.46)GLEFYK(-84.46)SSLK(-122.99);K(74.18)GLEFYK(-74.18)SSLK(-104.69)	KGLEFYKS(0.804)S(0.196)LK;KGLEFYKS(0.811)S(0.189)LK	KGLEFY(-96.52)KS(6.13)S(-6.13)LK;KGLEFY(-96.6)KS(6.32)S(-6.32)LK	_KGLEFYK(bi)SSLK_;_K(bi)GLEFYK(bi)SSLK_;_K(bi)GLEFYKS(ph)SLK_
PF3D7_0801000	P. falciparum	Plasmodium exported protein (PHISTc), unknown function				21.7857	21.7736	21.1513	22.6211	22.6489	22.0249							2 Biotin (K)	0	2			26825000	0.0011888	156.08	70.563	10	2	2	1664.81	33.826	KGSLGFDSFKK	226	1	144.51	120.796	+	1	121.95	79.9593		156	166	_KGSLGFDSFK(bi)K_;_KGSLGFDSFK(bi)K_;_KGSLGFDSFK(bi)K_;_KGSLGFDSFK(bi)K_;_K(bi)GSLGFDSFKK_;_KGSLGFDSFK(bi)K_;_K(bi)GSLGFDSFKK_;_K(bi)GSLGFDSFKK_;_KGSLGFDSFK(bi)K_;_KGSLGFDSFK(bi)K_;_KGSLGFDSFK(bi)K_;_KGSLGFDSFK(bi)K_;_KGSLGFDSFK(bi)K_;_KGSLGFDSFK(bi)K_;_KGSLGFDSFK(bi)K_;_K(bi)GS(ph)LGFDSFKK_;_K(bi)GS(ph)LGFDSFKK_;_KGS(ph)LGFDSFK(bi)K_;_K(bi)GS(ph)LGFDSFKK_;_K(bi)GS(ph)LGFDSFKK_;_KGS(ph)LGFDSFK(bi)…	KGSLGFDSFK(0.982)K(0.018);KGSLGFDSFK(0.83)K(0.17);KGSLGFDSFK(0.771)K(0.229);KGSLGFDSFK(0.915)K(0.085);K(1)GSLGFDSFKK;KGSLGFDSFK(0.981)K(0.019);K(1)GSLGFDSFKK;K(1)GSLGFDSFKK;KGSLGFDSFK(0.984)K(0.016);K(1)GSLGFDSFKK;K(1)GSLGFDSFKK;KGSLGFDSFK(0.91)K(0.09);K(1)GSLGFDSFKK;K(1)GSLGFDSFKK;KGSLGFDSFK(0.812)K(0.188);KGSLGFDSFK(0.275)K(0.725);K(1)GSLGFDSFKK;K(1)GSLGFDSFKK;K(1)GSLGFDSFKK;K(1)GSLGFDSFKK;KGSL…	K(-89.65)GSLGFDSFK(17.43)K(-17.43);K(-101.7)GSLGFDSFK(6.88)K(-6.88);K(-107.57)GSLGFDSFK(5.26)K(-5.26);K(-145.96)GSLGFDSFK(10.35)K(-10.35);K(131.05)GSLGFDSFK(-131.05)K(-134.57);K(-106.95)GSLGFDSFK(17.18)K(-17.18);K(112.86)GSLGFDSFK(-112.86)K(-113.3);K(112.43)GSLGFDSFK(-112.43)K(-118.66);K(-100.31)GSLGFDSFK(18)K(-18);K(103.5)GSLGFDSFK(-104.93)K(-103.5);K(61.24)GSLGFDSFK(-61.24)K(-69.52);K(-88.62)GS…	KGS(1)LGFDSFKK;KGS(1)LGFDSFKK;KGS(1)LGFDSFKK;KGS(1)LGFDSFKK;KGS(1)LGFDSFKK;KGS(1)LGFDSFKK;KGS(1)LGFDSFKK;KGS(1)LGFDSFKK;KGS(1)LGFDSFKK;KGS(1)LGFDSFKK;KGS(1)LGFDSFKK;KGS(1)LGFDSFKK;KGS(1)LGFDSFKK;KGS(1)LGFDSFKK;KGS(1)LGFDSFKK;KGS(1)LGFDSFKK;KGS(1)LGFDSFKK;KGS(1)LGFDSFKK;KGS(1)LGFDSFKK;KGS(1)LGFDSFKK;KGS(1)LGFDSFKK;KGS(1)LGFDSFKK;KGS(1)LGFDSFKK;KGS(1)LGFDSFKK;KGS(1)LGFDSFKK;KGS(1)LGFDSFKK;KGS(1)LGF…	KGS(66.57)LGFDS(-66.57)FKK;KGS(61.24)LGFDS(-61.24)FKK;KGS(52.35)LGFDS(-52.35)FKK;KGS(80.97)LGFDS(-80.97)FKK;KGS(90.56)LGFDS(-90.56)FKK;KGS(43)LGFDS(-43)FKK;KGS(68.5)LGFDS(-68.5)FKK;KGS(80.55)LGFDS(-80.55)FKK;KGS(81.54)LGFDS(-81.54)FKK;KGS(100.63)LGFDS(-100.63)FKK;KGS(85.58)LGFDS(-85.58)FKK;KGS(45.64)LGFDS(-45.64)FKK;KGS(98.39)LGFDS(-98.39)FKK;KGS(137.32)LGFDS(-137.32)FKK;KGS(60.17)LGFDS(-60.17)FK…	_KGSLGFDSFK(bi)K_;_K(bi)GSLGFDSFKK_;_K(bi)GS(ph)LGFDSFKK_;_KGS(ph)LGFDSFK(bi)K_;_KGS(ph)LGFDSFKK(bi)_;_K(bi)GSLGFDSFK(bi)K_;_K(bi)GSLGFDSFKK(bi)_
PF3D7_0401800	P. falciparum	Plasmodium exported protein (PHISTb), unknown function				24.0359	23.6865	23.2228	24.275	23.8764	23.4298							2 Biotin (K)	0	2			87502000	9.23e-15	196.97	129.74	22	NaN	3	2329.13	23.678	KILCYCASKNKSLHR	145	1	164.7	113.624	+	NaN	NaN	NaN		472	486	_KILCYCASK(bi)NK(bi)SLHR_;_KILCYCASK(bi)NK(bi)SLHR_;_KILCYCASK(bi)NK(bi)SLHR_;_KILCYCASK(bi)NK(bi)SLHR_;_KILCYCASK(bi)NK(bi)SLHR_;_KILCYCASK(bi)NK(bi)SLHR_;_KILCYCASK(bi)NK(bi)SLHR_;_KILCYCASK(bi)NK(bi)SLHR_;_KILCYCASK(bi)NK(bi)SLHR_;_KILCYCASK(bi)NK(bi)SLHR_;_KILCYCASK(bi)NK(bi)SLHR_;_KILCYCASK(bi)NK(bi)SLHR_;_KILCYCASK(bi)NK(bi)SLHR_	KILCYCASK(1)NK(1)SLHR;KILCYCASK(1)NK(1)SLHR;KILCYCASK(1)NK(1)SLHR;KILCYCASK(1)NK(1)SLHR;KILCYCASK(1)NK(1)SLHR;KILCYCASK(1)NK(1)SLHR;KILCYCASK(1)NK(1)SLHR;KILCYCASK(1)NK(1)SLHR;KILCYCASK(1)NK(1)SLHR;KILCYCASK(1)NK(1)SLHR;KILCYCASK(1)NK(1)SLHR;KILCYCASK(1)NK(1)SLHR;KILCYCASK(1)NK(1)SLHR	K(-61.58)ILCYCASK(61.58)NK(75.64)SLHR;K(-128.09)ILCYCASK(128.09)NK(149.48)SLHR;K(-84.71)ILCYCASK(84.71)NK(88.6)SLHR;K(-124.08)ILCYCASK(124.08)NK(149.94)SLHR;K(-39.43)ILCYCASK(39.43)NK(43.45)SLHR;K(-82.33)ILCYCASK(82.33)NK(106.19)SLHR;K(-120.22)ILCYCASK(120.22)NK(134.63)SLHR;K(-54.6)ILCYCASK(54.6)NK(59.27)SLHR;K(-105.28)ILCYCASK(105.28)NK(123.61)SLHR;K(-50.32)ILCYCASK(50.32)NK(55.35)SLHR;K(-61.35)…			_KILCYCASK(bi)NK(bi)SLHR_
PF3D7_0730900	P. falciparum	EMP1-trafficking protein										24.0105	24.0935	24.4614	24.0772	23.7796	23.6431	2 Biotin (K)	0	2			103130000	4.38e-20	253.42	180.69	12	2	2	1705.8	27.838	KKYNFGPSEGK	222	NaN	NaN	NaN		NaN	NaN	NaN		1741	1751	_K(bi)KYNFGPSEGK_;_K(bi)KYNFGPSEGK_;_KK(bi)YNFGPSEGK_;_K(bi)KYNFGPSEGK_;_KK(bi)YNFGPSEGK_;_K(bi)KYNFGPSEGK_;_KK(bi)YNFGPSEGK_;_K(bi)KYNFGPSEGK_;_K(bi)KYNFGPSEGK_;_K(bi)KYNFGPSEGK_;_K(bi)KYNFGPSEGK_;_KK(bi)YNFGPSEGK_;_K(bi)KYNFGPSEGK_;_K(bi)KYNFGPSEGK_;_K(bi)KYNFGPSEGK_;_K(bi)K(bi)YNFGPSEGK_;_K(bi)K(bi)YNFGPSEGK_;_K(bi)K(bi)YNFGPSEGK_;_K(bi)K(bi)YNFGPSEGK_;_K(bi)K(bi)YNFGPSEGK_;_K(bi)K(bi)YNFGPSEG…	K(0.5)K(0.5)YNFGPSEGK;K(0.5)K(0.5)YNFGPSEGK;K(0.211)K(0.789)YNFGPSEGK;K(0.817)K(0.183)YNFGPSEGK;K(0.089)K(0.911)YNFGPSEGK;K(0.795)K(0.205)YNFGPSEGK;K(0.009)K(0.991)YNFGPSEGK;K(0.796)K(0.204)YNFGPSEGK;K(0.5)K(0.5)YNFGPSEGK;K(0.976)K(0.024)YNFGPSEGK;K(0.5)K(0.5)YNFGPSEGK;K(0.205)K(0.795)YNFGPSEGK;K(0.978)K(0.022)YNFGPSEGK;K(1)K(1)YNFGPSEGK;K(1)K(1)YNFGPSEGK;K(1)K(1)YNFGPSEGK;K(1)K(1)YNFGPSEGK;K(1)K…	K(0)K(0)YNFGPSEGK(-113.07);K(0)K(0)YNFGPSEGK(-50.1);K(-5.72)K(5.72)YNFGPSEGK(-42.53);K(6.5)K(-6.5)YNFGPSEGK(-119.54);K(-10.1)K(10.1)YNFGPSEGK(-103.06);K(5.87)K(-5.87)YNFGPSEGK(-102.59);K(-20.31)K(20.31)YNFGPSEGK(-117.14);K(5.9)K(-5.9)YNFGPSEGK(-118.97);K(0)K(0)YNFGPSEGK(-155.29);K(16.17)K(-16.17)YNFGPSEGK(-144.68);K(0)K(0)YNFGPSEGK(-132.85);K(-5.87)K(5.87)YNFGPSEGK(-95.72);K(16.47)K(-16.47)YNFGPS…			_K(bi)KYNFGPSEGK_;_KK(bi)YNFGPSEGK_;_K(bi)K(bi)YNFGPSEGK_
PF3D7_0730900	P. falciparum	EMP1-trafficking protein				20.6837	20.5795	20.1736	21.425	20.5083	20.6422	25.5667	25.9825	25.7129	25.9933	25.5105	25.5075	2 Biotin (K)	0	2			343700000	5.23e-09	193.11	102.04	23	NaN	3	1962.93	24.357	KKYNFGPSEGKEK	222	1	144.18	112.968	+	NaN	NaN	NaN		1741	1753	_K(bi)KYNFGPSEGKEK_;_K(bi)KYNFGPSEGKEK_;_K(bi)KYNFGPSEGKEK_;_K(bi)KYNFGPSEGKEK_;_K(bi)KYNFGPSEGKEK_;_K(bi)KYNFGPSEGKEK_;_K(bi)KYNFGPSEGKEK_;_K(bi)KYNFGPSEGKEK_;_K(bi)KYNFGPSEGKEK_;_K(bi)KYNFGPSEGKEK_;_K(bi)KYNFGPSEGKEK_;_K(bi)KYNFGPSEGKEK_;_K(bi)KYNFGPSEGKEK_;_K(bi)KYNFGPSEGKEK_;_K(bi)KYNFGPSEGKEK_;_K(bi)KYNFGPSEGKEK_;_KK(bi)YNFGPSEGKEK_;_K(bi)KYNFGPSEGKEK_;_K(bi)KYNFGPSEGKEK_;_K(bi)KYNFGPSEGKEK_…	K(0.5)K(0.5)YNFGPSEGKEK;K(0.5)K(0.5)YNFGPSEGKEK;K(0.77)K(0.23)YNFGPSEGKEK;K(0.5)K(0.5)YNFGPSEGKEK;K(0.5)K(0.5)YNFGPSEGKEK;K(0.5)K(0.5)YNFGPSEGKEK;K(0.5)K(0.5)YNFGPSEGKEK;K(0.5)K(0.5)YNFGPSEGKEK;K(0.5)K(0.5)YNFGPSEGKEK;K(0.5)K(0.5)YNFGPSEGKEK;K(0.5)K(0.5)YNFGPSEGKEK;K(0.5)K(0.5)YNFGPSEGKEK;K(0.5)K(0.5)YNFGPSEGKEK;K(0.5)K(0.5)YNFGPSEGKEK;K(0.5)K(0.5)YNFGPSEGKEK;K(0.974)K(0.026)YNFGPSEGKEK;K(0.038)K…	K(0)K(0)YNFGPSEGK(-78.21)EK(-77.98);K(0)K(0)YNFGPSEGK(-67.46)EK(-67.28);K(5.25)K(-5.25)YNFGPSEGK(-104.74)EK(-107.47);K(0)K(0)YNFGPSEGK(-50.99)EK(-55.08);K(0)K(0)YNFGPSEGK(-101.77)EK(-111.4);K(0)K(0)YNFGPSEGK(-90.16)EK(-92.33);K(0)K(0)YNFGPSEGK(-98.7)EK(-100.35);K(0)K(0)YNFGPSEGK(-127.38)EK(-132.09);K(0)K(0)YNFGPSEGK(-98.34)EK(-104.92);K(0)K(0)YNFGPSEGK(-111.89)EK(-111.53);K(0)K(0)YNFGPSEGK(-130.2…			_K(bi)KYNFGPSEGKEK_;_KK(bi)YNFGPSEGKEK_;_K(bi)K(bi)YNFGPSEGKEK_
PF3D7_0730900	P. falciparum	EMP1-trafficking protein										20.4654	21.0267	20.9139	20.5345	20.6507	21.0373	2 Biotin (K)	0	2			10877000	0.0094246	75.102	38.157	3	4	2	2058.99	14.694	KLGKHEHHEDHLK	222	1	75.102	68.2691	+	NaN	NaN	NaN		1928	1940	_KLGK(bi)HEHHEDHLK_;_KLGK(bi)HEHHEDHLK_;_K(bi)LGKHEHHEDHLK_;_K(bi)LGKHEHHEDHLK_;_KLGK(bi)HEHHEDHLK_;_KLGK(bi)HEHHEDHLK_;_KLGK(bi)HEHHEDHLK_;_KLGK(bi)HEHHEDHLK_;_KLGK(bi)HEHHEDHLK_;_KLGK(bi)HEHHEDHLK_;_KLGK(bi)HEHHEDHLK_;_KLGK(bi)HEHHEDHLK_;_KLGK(bi)HEHHEDHLK_;_KLGK(bi)HEHHEDHLK_;_KLGK(bi)HEHHEDHLK_;_KLGK(bi)HEHHEDHLK_;_K(bi)LGK(bi)HEHHEDHLK_;_K(bi)LGK(bi)HEHHEDHLK_;_K(bi)LGK(bi)HEHHEDHLK_;_K(bi)L…	K(0.017)LGK(0.983)HEHHEDHLK;K(0.01)LGK(0.99)HEHHEDHLK;K(0.962)LGK(0.038)HEHHEDHLK;K(0.681)LGK(0.319)HEHHEDHLK;K(0.08)LGK(0.92)HEHHEDHLK;K(0.036)LGK(0.964)HEHHEDHLK;K(0.09)LGK(0.91)HEHHEDHLK;K(0.025)LGK(0.975)HEHHEDHLK;K(0.069)LGK(0.931)HEHHEDHLK;K(1)LGK(1)HEHHEDHLK;K(1)LGK(1)HEHHEDHLK;K(1)LGK(1)HEHHEDHLK	K(-17.65)LGK(17.65)HEHHEDHLK(-92.85);K(-19.96)LGK(19.96)HEHHEDHLK(-111.71);K(13.99)LGK(-13.99)HEHHEDHLK(-106.54);K(3.29)LGK(-3.29)HEHHEDHLK(-50.75);K(-10.59)LGK(10.59)HEHHEDHLK(-93.11);K(-14.24)LGK(14.24)HEHHEDHLK(-112.78);K(-10.07)LGK(10.07)HEHHEDHLK(-86.22);K(-15.89)LGK(15.89)HEHHEDHLK(-123.52);K(-11.31)LGK(11.31)HEHHEDHLK(-129.47);K(68.27)LGK(57.9)HEHHEDHLK(-57.9);K(60.55)LGK(49.5)HEHHEDHLK(-4…			_KLGK(bi)HEHHEDHLK_;_K(bi)LGKHEHHEDHLK_;_K(bi)LGK(bi)HEHHEDHLK_
PF3D7_0730900	P. falciparum	EMP1-trafficking protein										23.1155	23.8288	22.857	23.3645	23.0779	24.0526	2 Biotin (K)	0	2			68713000	0.00015868	122.63	72.552	23	NaN	3	2244.1	12.996	KLGKHEHHEDHLKGK	222	NaN	NaN	NaN		NaN	NaN	NaN		1928	1942	_K(bi)LGKHEHHEDHLK(bi)GK_;_KLGK(bi)HEHHEDHLK(bi)GK_;_K(bi)LGKHEHHEDHLK(bi)GK_;_KLGK(bi)HEHHEDHLK(bi)GK_;_KLGK(bi)HEHHEDHLK(bi)GK_;_K(bi)LGKHEHHEDHLK(bi)GK_;_KLGK(bi)HEHHEDHLK(bi)GK_;_KLGK(bi)HEHHEDHLK(bi)GK_;_KLGK(bi)HEHHEDHLK(bi)GK_;_K(bi)LGKHEHHEDHLK(bi)GK_;_K(bi)LGKHEHHEDHLK(bi)GK_;_K(bi)LGKHEHHEDHLK(bi)GK_;_K(bi)LGKHEHHEDHLK(bi)GK_;_K(bi)LGKHEHHEDHLK(bi)GK_;_KLGK(bi)HEHHEDHLK(bi)GK_;_K(bi)LGK…	K(0.5)LGK(0.5)HEHHEDHLK(0.97)GK(0.03);K(0.136)LGK(0.864)HEHHEDHLK(0.98)GK(0.02);K(0.5)LGK(0.5)HEHHEDHLK(0.854)GK(0.146);K(0.023)LGK(0.977)HEHHEDHLK(0.983)GK(0.017);K(0.041)LGK(0.959)HEHHEDHLK(0.81)GK(0.19);K(0.5)LGK(0.5)HEHHEDHLK(0.801)GK(0.199);K(0.149)LGK(0.851)HEHHEDHLK(0.975)GK(0.025);K(0.188)LGK(0.812)HEHHEDHLK(0.958)GK(0.042);K(0.042)LGK(0.958)HEHHEDHLK(0.969)GK(0.031);K(0.82)LGK(0.18)HEHHE…	K(0)LGK(0)HEHHEDHLK(15.05)GK(-15.05);K(-8.06)LGK(8.06)HEHHEDHLK(16.87)GK(-16.87);K(0)LGK(0)HEHHEDHLK(7.67)GK(-7.67);K(-16.33)LGK(16.33)HEHHEDHLK(17.69)GK(-17.69);K(-13.76)LGK(13.76)HEHHEDHLK(6.3)GK(-6.3);K(0)LGK(0)HEHHEDHLK(6.05)GK(-6.05);K(-7.57)LGK(7.57)HEHHEDHLK(16.06)GK(-16.06);K(-6.36)LGK(6.36)HEHHEDHLK(13.68)GK(-13.68);K(-13.61)LGK(13.61)HEHHEDHLK(14.96)GK(-14.96);K(6.57)LGK(-6.57)HEHHEDHLK…			_K(bi)LGKHEHHEDHLK(bi)GK_;_KLGK(bi)HEHHEDHLK(bi)GK_;_K(bi)LGKHEHHEDHLKGK_;_KLGK(bi)HEHHEDHLKGK_;_KLGKHEHHEDHLK(bi)GK_;_KLGKHEHHEDHLKGK(bi)_
PF3D7_0113000	P. falciparum	glutamic acid-rich protein				20.8701	20.7894	20.6566	21.5203	21.155								2 Biotin (K)	0	2			10725000	5.19e-05	154.13	107.47	7	3	3	2125.07	26.437	KMAKIEEAELQKQK	106	1	118.52	106.599	+	NaN	NaN	NaN		530	543	_KMAK(bi)IEEAELQKQK_;_KMAK(bi)IEEAELQKQK_;_KMAK(bi)IEEAELQKQK_;_K(bi)MAKIEEAELQKQK_;_K(bi)MAKIEEAELQKQK_;_KMAK(bi)IEEAELQKQK_;_KMAK(bi)IEEAELQKQK_;_KMAK(bi)IEEAELQKQK_;_KMAK(bi)IEEAELQKQK_;_K(bi)MAKIEEAELQKQK_;_KMAK(bi)IEEAELQKQK_;_K(bi)MAKIEEAELQKQK_;_K(bi)MAK(bi)IEEAELQKQK_;_K(bi)MAK(bi)IEEAELQKQK_;_K(bi)MAK(bi)IEEAELQKQK_;_K(bi)MAK(bi)IEEAELQKQK_;_K(bi)MAK(bi)IEEAELQKQK_;_K(bi)MAK(bi)IEEAELQKQ…	K(0.009)MAK(0.991)IEEAELQKQK;K(0.168)MAK(0.832)IEEAELQKQK;K(0.019)MAK(0.981)IEEAELQKQK;K(0.959)MAK(0.041)IEEAELQKQK;K(0.973)MAK(0.027)IEEAELQKQK;K(0.107)MAK(0.893)IEEAELQKQK;K(0.008)MAK(0.992)IEEAELQKQK;K(0.214)MAK(0.786)IEEAELQKQK;K(0.062)MAK(0.938)IEEAELQKQK;K(0.5)MAK(0.5)IEEAELQKQK;K(0.058)MAK(0.942)IEEAELQKQK;K(0.748)MAK(0.252)IEEAELQKQK;K(1)MAK(1)IEEAELQKQK;K(1)MAK(1)IEEAELQKQK;K(1)MAK(1)IEE…	K(-20.39)MAK(20.39)IEEAELQK(-172.59)QK(-180.44);K(-6.94)MAK(6.94)IEEAELQK(-102.95)QK(-105.52);K(-17.18)MAK(17.18)IEEAELQK(-132.06)QK(-135.8);K(13.66)MAK(-13.66)IEEAELQK(-109.55)QK(-109.55);K(15.62)MAK(-15.62)IEEAELQK(-91.36)QK(-91.36);K(-9.24)MAK(9.24)IEEAELQK(-166.45)QK(-169.35);K(-21.12)MAK(21.12)IEEAELQK(-185.77)QK(-190.76);K(-5.64)MAK(5.64)IEEAELQK(-100.89)QK(-100.89);K(-11.8)MAK(11.8)IEEAELQ…			_KMAK(bi)IEEAELQKQK_;_K(bi)MAKIEEAELQKQK_;_K(bi)MAK(bi)IEEAELQKQK_;_K(bi)M(ox)AKIEEAELQKQK_;_KM(ox)AK(bi)IEEAELQKQK_
PF3D7_0532400	P. falciparum	lysine-rich membrane-associated PHISTb protein								22.0201								2 Biotin (K)	0	2			4253100	0.0022158	79.663	39.845	1	3	2	3482.58	29.569	KNPEMLTENQINEEENENTKVGGANTK	185	0.999999	166.92	70.4934	+	NaN	NaN	NaN		414	440	_K(bi)NPEM(ox)LTENQINEEENENTKVGGANTK_;_KNPEM(ox)LTENQINEEENENTK(bi)VGGANTK_;_K(bi)NPEM(ox)LTENQINEEENENTKVGGANTK_;_K(bi)NPEM(ox)LTENQINEEENENTKVGGANTK_;_KNPEM(ox)LTENQINEEENENTK(bi)VGGANTK_;_KNPEM(ox)LTENQINEEENENTK(bi)VGGANTK_;_K(bi)NPEM(ox)LTENQINEEENENTKVGGANTK_;_K(bi)NPEM(ox)LTENQINEEENENTKVGGANTK_;_KNPEM(ox)LTENQINEEENENTK(bi)VGGANTK_;_K(bi)NPEM(ox)LTENQINEEENENTKVGGANTK_;_KNPEM(ox)LTENQINEE…	K(0.985)NPEMLTENQINEEENENTK(0.015)VGGANTK;KNPEMLTENQINEEENENTK(1)VGGANTK;K(1)NPEMLTENQINEEENENTKVGGANTK;K(0.996)NPEMLTENQINEEENENTK(0.004)VGGANTK;KNPEMLTENQINEEENENTK(0.995)VGGANTK(0.005);KNPEMLTENQINEEENENTK(0.999)VGGANTK(0.001);K(0.998)NPEMLTENQINEEENENTK(0.002)VGGANTK;K(1)NPEMLTENQINEEENENTKVGGANTK;KNPEMLTENQINEEENENTK(0.999)VGGANTK(0.001);K(1)NPEMLTENQINEEENENTKVGGANTK;KNPEMLTENQINEEENENTK(1)…	K(18.04)NPEMLTENQINEEENENTK(-18.04)VGGANTK(-48.47);K(-152.69)NPEMLTENQINEEENENTK(34.72)VGGANTK(-34.72);K(118.51)NPEMLTENQINEEENENTK(-118.51)VGGANTK(-121.84);K(23.55)NPEMLTENQINEEENENTK(-23.55)VGGANTK(-54.92);K(-103.81)NPEMLTENQINEEENENTK(22.61)VGGANTK(-22.61);K(-80.59)NPEMLTENQINEEENENTK(28.25)VGGANTK(-28.25);K(27.88)NPEMLTENQINEEENENTK(-27.88)VGGANTK(-42.23);K(34.99)NPEMLTENQINEEENENTK(-34.99)VG…			_K(bi)NPEM(ox)LTENQINEEENENTKVGGANTK_;_KNPEM(ox)LTENQINEEENENTK(bi)VGGANTK_;_KNPEMLTENQINEEENENTK(bi)VGGANTK_;_K(bi)NPEMLTENQINEEENENTKVGGANTK_;_K(bi)NPEMLTENQINEEENENTK(bi)VGGANTK_
PF3D7_0702500	P. falciparum	Plasmodium exported protein, unknown function				20.708			23.9584	23.9672	23.2961	22.2525	21.8515	21.2545	22.3781	23.2169	23.0039	2 Biotin (K)	0	2			79642000	8.35e-05	132.51	91.761	12	NaN	3	2137.08	28.671	KTKAHGLFEEIEKR	202	1	110.04	110.044	+	NaN	NaN	NaN		90	103	_K(bi)TKAHGLFEEIEKR_;_KTK(bi)AHGLFEEIEKR_;_KTK(bi)AHGLFEEIEKR_;_KTK(bi)AHGLFEEIEKR_;_KTK(bi)AHGLFEEIEKR_;_KTK(bi)AHGLFEEIEKR_;_K(bi)TKAHGLFEEIEKR_;_KTK(bi)AHGLFEEIEKR_;_KTK(bi)AHGLFEEIEKR_;_KTK(bi)AHGLFEEIEKR_;_K(bi)TKAHGLFEEIEKR_;_KTK(bi)AHGLFEEIEKR_;_KTK(bi)AHGLFEEIEKR_;_K(bi)TKAHGLFEEIEKR_;_KTK(bi)AHGLFEEIEKR_;_K(bi)TKAHGLFEEIEKR_;_KTK(bi)AHGLFEEIEKR_;_K(bi)TKAHGLFEEIEKR_;_KTK(bi)AHGLFEEIEKR_;…	K(0.686)TK(0.314)AHGLFEEIEKR;K(0.034)TK(0.966)AHGLFEEIEKR;K(0.012)TK(0.988)AHGLFEEIEKR;K(0.033)TK(0.967)AHGLFEEIEKR;K(0.052)TK(0.948)AHGLFEEIEKR;K(0.026)TK(0.974)AHGLFEEIEKR;K(0.944)TK(0.056)AHGLFEEIEKR;K(0.013)TK(0.987)AHGLFEEIEKR;K(0.234)TK(0.766)AHGLFEEIEKR;K(0.1)TK(0.9)AHGLFEEIEKR;K(0.524)TK(0.476)AHGLFEEIEKR;K(0.047)TK(0.953)AHGLFEEIEKR;K(0.196)TK(0.804)AHGLFEEIEKR;K(0.697)TK(0.303)AHGLFEEIE…	K(3.4)TK(-3.4)AHGLFEEIEK(-118.29)R;K(-14.54)TK(14.54)AHGLFEEIEK(-147.49)R;K(-19.11)TK(19.11)AHGLFEEIEK(-106.66)R;K(-14.72)TK(14.72)AHGLFEEIEK(-126.83)R;K(-12.6)TK(12.6)AHGLFEEIEK(-82.25)R;K(-15.82)TK(15.82)AHGLFEEIEK(-138.2)R;K(12.31)TK(-12.31)AHGLFEEIEK(-125.26)R;K(-18.86)TK(18.86)AHGLFEEIEK(-161.14)R;K(-5.16)TK(5.16)AHGLFEEIEK(-122.38)R;K(-9.54)TK(9.54)AHGLFEEIEK(-161.14)R;K(0.42)TK(-0.42)AHGLF…			_K(bi)TKAHGLFEEIEKR_;_KTK(bi)AHGLFEEIEKR_;_K(bi)TKAHGLFEEIEK(bi)R_;_K(bi)TK(bi)AHGLFEEIEKR_;_K(bi)TK(bi)AHGLFEEIEK(bi)R_
PF3D7_0730900	P. falciparum	EMP1-trafficking protein										22.943	23.3511	22.8736	22.9691	23.0823	23.0282	2 Biotin (K)	0	2			52137000	1.82e-12	183.76	109.37	14	NaN	2	2157.07	29.872	KYVGVLKNNSDGGINK	222	NaN	NaN	NaN		NaN	NaN	NaN		1010	1025	_KYVGVLK(bi)NNSDGGINK_;_KYVGVLK(bi)NNSDGGINK_;_KYVGVLK(bi)NNSDGGINK_;_KYVGVLK(bi)NNSDGGINK_;_KYVGVLK(bi)NNSDGGINK_;_KYVGVLK(bi)NNSDGGINK_;_KYVGVLK(bi)NNSDGGINK_;_K(bi)YVGVLK(bi)NNSDGGINK_;_K(bi)YVGVLK(bi)NNSDGGINK_;_K(bi)YVGVLK(bi)NNSDGGINK_;_K(bi)YVGVLK(bi)NNSDGGINK_;_K(bi)YVGVLK(bi)NNSDGGINK_;_K(bi)YVGVLK(bi)NNSDGGINK_;_K(bi)YVGVLK(bi)NNSDGGINK_;_K(bi)YVGVLK(bi)NNSDGGINK_;_K(bi)YVGVLK(bi)NNSDGG…	KYVGVLK(1)NNSDGGINK;KYVGVLK(1)NNSDGGINK;KYVGVLK(1)NNSDGGINK;KYVGVLK(1)NNSDGGINK;KYVGVLK(1)NNSDGGINK;KYVGVLK(1)NNSDGGINK;KYVGVLK(1)NNSDGGINK;K(1)YVGVLK(1)NNSDGGINK;K(1)YVGVLK(1)NNSDGGINK;K(1)YVGVLK(1)NNSDGGINK;K(1)YVGVLK(1)NNSDGGINK;K(1)YVGVLK(1)NNSDGGINK;K(1)YVGVLK(1)NNSDGGINK;K(1)YVGVLK(1)NNSDGGINK;K(1)YVGVLK(1)NNSDGGINK;K(1)YVGVLK(1)NNSDGGINK;K(1)YVGVLK(1)NNSDGGINK	K(-75.17)YVGVLK(41.33)NNSDGGINK(-41.33);K(-51.4)YVGVLK(51.4)NNSDGGINK(-63.29);K(-41.41)YVGVLK(41.41)NNSDGGINK(-52.37);K(-62.25)YVGVLK(59.12)NNSDGGINK(-59.12);K(-51.78)YVGVLK(51.78)NNSDGGINK(-61.25);K(-40.49)YVGVLK(40.49)NNSDGGINK(-59.07);K(-52.55)YVGVLK(52.55)NNSDGGINK(-82.08);K(102.87)YVGVLK(69.36)NNSDGGINK(-69.36);K(145.23)YVGVLK(68.2)NNSDGGINK(-68.2);K(155.6)YVGVLK(66.72)NNSDGGINK(-66.72);K(17…			_KYVGVLK(bi)NNSDGGINK_;_K(bi)YVGVLK(bi)NNSDGGINK_
PF3D7_0730900	P. falciparum	EMP1-trafficking protein						21.8668		22.7309		25.5955	25.9043		25.4769	25.7695	25.9157	2 Biotin (K)	0	2			291470000	1.27e-18	174.04	131.08	15	3	3	2705.33	29.924	KYVGVLKNNSDGGINKDFGTK	222	1	113.7	110.327	+	NaN	NaN	NaN		1010	1030	_KYVGVLK(bi)NNSDGGINKDFGTK_;_KYVGVLK(bi)NNSDGGINKDFGTK_;_KYVGVLK(bi)NNSDGGINKDFGTK_;_KYVGVLK(bi)NNSDGGINKDFGTK_;_KYVGVLK(bi)NNSDGGINKDFGTK_;_KYVGVLK(bi)NNSDGGINKDFGTK_;_KYVGVLK(bi)NNSDGGINKDFGTK_;_KYVGVLK(bi)NNSDGGINKDFGTK_;_KYVGVLK(bi)NNSDGGINKDFGTK_;_KYVGVLK(bi)NNSDGGINKDFGTK_;_KYVGVLK(bi)NNSDGGINKDFGTK_;_KYVGVLK(bi)NNSDGGINKDFGTK_;_KYVGVLK(bi)NNSDGGINKDFGTK_;_KYVGVLK(bi)NNSDGGINKDFGTK_;_KYVGVL…	KYVGVLK(1)NNSDGGINKDFGTK;KYVGVLK(1)NNSDGGINKDFGTK;KYVGVLK(1)NNSDGGINKDFGTK;KYVGVLK(1)NNSDGGINKDFGTK;KYVGVLK(1)NNSDGGINKDFGTK;KYVGVLK(1)NNSDGGINKDFGTK;K(0.001)YVGVLK(0.999)NNSDGGINKDFGTK;KYVGVLK(1)NNSDGGINKDFGTK;K(0.001)YVGVLK(0.999)NNSDGGINKDFGTK;KYVGVLK(1)NNSDGGINKDFGTK;K(0.03)YVGVLK(0.97)NNSDGGINKDFGTK;KYVGVLK(1)NNSDGGINKDFGTK;KYVGVLK(1)NNSDGGINKDFGTK;KYVGVLK(1)NNSDGGINKDFGTK;KYVGVLK(1)NNSDGGIN…	K(-39.06)YVGVLK(39.06)NNSDGGINK(-48.32)DFGTK(-54.14);K(-65.48)YVGVLK(54.7)NNSDGGINK(-54.7)DFGTK(-71.7);K(-43.73)YVGVLK(43.73)NNSDGGINK(-98.24)DFGTK(-104.41);K(-64.05)YVGVLK(64.05)NNSDGGINK(-90.9)DFGTK(-97.21);K(-37.31)YVGVLK(37.31)NNSDGGINK(-47.66)DFGTK(-46.81);K(-64.93)YVGVLK(46.27)NNSDGGINK(-46.27)DFGTK(-55.94);K(-29.49)YVGVLK(29.49)NNSDGGINK(-77.69)DFGTK(-67.24);K(-43.39)YVGVLK(43.39)NNSDGGINK…			_KYVGVLK(bi)NNSDGGINKDFGTK_;_K(bi)YVGVLK(bi)NNSDGGINKDFGTK_;_K(bi)YVGVLKNNSDGGINKDFGTK(bi)_;_KYVGVLK(bi)NNSDGGINKDFGTK(bi)_;_K(bi)YVGVLK(bi)NNSDGGINK(bi)DFGTK_
PF3D7_0730900	P. falciparum	EMP1-trafficking protein										23.2403	23.9584	23.5045	23.4923	23.4041	23.8093	2 Biotin (K)	0	2			75707000	5.64e-09	178.67	126.1	22	NaN	2	2116.01	14.531	LGKHEHHEDHLKGK	222	NaN	NaN	NaN		NaN	NaN	NaN		1907	1920	_LGK(bi)HEHHEDHLKGK_;_LGK(bi)HEHHEDHLKGK_;_LGK(bi)HEHHEDHLKGK_;_LGK(bi)HEHHEDHLKGK_;_LGK(bi)HEHHEDHLKGK_;_LGK(bi)HEHHEDHLKGK_;_LGKHEHHEDHLK(bi)GK_;_LGK(bi)HEHHEDHLKGK_;_LGK(bi)HEHHEDHLKGK_;_LGKHEHHEDHLK(bi)GK_;_LGKHEHHEDHLK(bi)GK_;_LGKHEHHEDHLK(bi)GK_;_LGKHEHHEDHLK(bi)GK_;_LGK(bi)HEHHEDHLKGK_;_LGK(bi)HEHHEDHLKGK_;_LGKHEHHEDHLK(bi)GK_;_LGKHEHHEDHLK(bi)GK_;_LGKHEHHEDHLK(bi)GK_;_LGKHEHHEDHLK(bi)GK_;…	LGK(1)HEHHEDHLKGK;LGK(1)HEHHEDHLKGK;LGK(1)HEHHEDHLKGK;LGK(1)HEHHEDHLKGK;LGK(1)HEHHEDHLKGK;LGK(1)HEHHEDHLKGK;LGKHEHHEDHLK(0.806)GK(0.194);LGK(1)HEHHEDHLKGK;LGK(1)HEHHEDHLKGK;LGKHEHHEDHLK(0.997)GK(0.003);LGKHEHHEDHLK(0.866)GK(0.134);LGKHEHHEDHLK(0.82)GK(0.179);LGK(0.013)HEHHEDHLK(0.812)GK(0.175);LGK(1)HEHHEDHLKGK;LGK(1)HEHHEDHLKGK;LGKHEHHEDHLK(0.557)GK(0.443);LGKHEHHEDHLK(1)GK;LGKHEHHEDHLK(0.865)GK…	LGK(56.16)HEHHEDHLK(-56.16)GK(-62.94);LGK(50.74)HEHHEDHLK(-50.74)GK(-54.33);LGK(67.44)HEHHEDHLK(-67.44)GK(-71.69);LGK(96.43)HEHHEDHLK(-96.43)GK(-105.41);LGK(54.94)HEHHEDHLK(-54.94)GK(-64.4);LGK(71.93)HEHHEDHLK(-71.93)GK(-74.92);LGK(-42.45)HEHHEDHLK(6.2)GK(-6.2);LGK(88.7)HEHHEDHLK(-88.7)GK(-100.95);LGK(98.55)HEHHEDHLK(-98.55)GK(-102.81);LGK(-90.64)HEHHEDHLK(25.78)GK(-25.78);LGK(-72.36)HEHHEDHLK(8.…			_LGK(bi)HEHHEDHLKGK_;_LGKHEHHEDHLK(bi)GK_;_LGKHEHHEDHLKGK(bi)_;_LGK(bi)HEHHEDHLK(bi)GK_
PF3D7_0730900	P. falciparum	EMP1-trafficking protein										22.4947	22.5998	22.4098	21.8855	23.1653	23.3511	2 Biotin (K)	0	2			41841000	3.38e-06	121.01	78.297	14	NaN	3	2705.27	20.105	LGKHEHHEDHLKGKFGDNR	222	1	124.25	124.249	+	NaN	NaN	NaN		1907	1925	_LGKHEHHEDHLKGK(bi)FGDNR_;_LGKHEHHEDHLKGK(bi)FGDNR_;_LGKHEHHEDHLKGK(bi)FGDNR_;_LGKHEHHEDHLKGK(bi)FGDNR_;_LGKHEHHEDHLKGK(bi)FGDNR_;_LGKHEHHEDHLKGK(bi)FGDNR_;_LGKHEHHEDHLKGK(bi)FGDNR_;_LGKHEHHEDHLKGK(bi)FGDNR_;_LGKHEHHEDHLKGK(bi)FGDNR_;_LGKHEHHEDHLKGK(bi)FGDNR_;_LGKHEHHEDHLKGK(bi)FGDNR_;_LGKHEHHEDHLKGK(bi)FGDNR_;_LGKHEHHEDHLKGK(bi)FGDNR_;_LGKHEHHEDHLKGK(bi)FGDNR_;_LGKHEHHEDHLKGK(bi)FGDNR_;_LGKHEHHE…	LGKHEHHEDHLK(0.057)GK(0.943)FGDNR;LGKHEHHEDHLK(0.048)GK(0.952)FGDNR;LGKHEHHEDHLK(0.276)GK(0.724)FGDNR;LGKHEHHEDHLK(0.132)GK(0.868)FGDNR;LGKHEHHEDHLK(0.017)GK(0.983)FGDNR;LGKHEHHEDHLK(0.046)GK(0.954)FGDNR;LGKHEHHEDHLK(0.023)GK(0.977)FGDNR;LGKHEHHEDHLK(0.032)GK(0.968)FGDNR;LGKHEHHEDHLK(0.344)GK(0.656)FGDNR;LGKHEHHEDHLK(0.368)GK(0.632)FGDNR;LGKHEHHEDHLK(1)GK(1)FGDNR;LGKHEHHEDHLK(1)GK(1)FGDNR;LGKHEHH…	LGK(-103.95)HEHHEDHLK(-12.22)GK(12.22)FGDNR;LGK(-85.09)HEHHEDHLK(-13.02)GK(13.02)FGDNR;LGK(-46.75)HEHHEDHLK(-4.19)GK(4.19)FGDNR;LGK(-42.56)HEHHEDHLK(-8.18)GK(8.18)FGDNR;LGK(-116.04)HEHHEDHLK(-17.59)GK(17.59)FGDNR;LGK(-37.58)HEHHEDHLK(-13.16)GK(13.16)FGDNR;LGK(-60.13)HEHHEDHLK(-16.33)GK(16.33)FGDNR;LGK(-58.15)HEHHEDHLK(-14.78)GK(14.78)FGDNR;LGK(-62.29)HEHHEDHLK(-2.81)GK(2.81)FGDNR;LGK(-57.94)HEHHE…			_LGKHEHHEDHLKGK(bi)FGDNR_;_LGKHEHHEDHLK(bi)GK(bi)FGDNR_;_LGK(bi)HEHHEDHLK(bi)GK(bi)FGDNR_
PF3D7_1477500	P. falciparum	Plasmodium exported protein (PHISTb), unknown function				20.8795												2 Biotin (K)	0	2			1929100	8.4e-06	170.95	111.6	3	3	3	2028.11	33.484	LKIKSKGGNPLFFK	467	NaN	NaN	NaN		NaN	NaN	NaN		323	336	_LKIK(bi)SK(bi)GGNPLFFK_;_LKIK(bi)SK(bi)GGNPLFFK_;_LKIK(bi)SK(bi)GGNPLFFK_	LK(0.001)IK(0.999)SK(1)GGNPLFFK;LK(0.001)IK(0.999)SK(1)GGNPLFFK;LK(0.001)IK(0.999)SK(1)GGNPLFFK	LK(-31.36)IK(31.36)SK(65.94)GGNPLFFK(-68.2);LK(-28.85)IK(28.85)SK(92.55)GGNPLFFK(-105.05);LK(-32.13)IK(32.13)SK(81.84)GGNPLFFK(-94.03)			_LKIK(bi)SK(bi)GGNPLFFK_
PF3D7_0730900	P. falciparum	EMP1-trafficking protein										23.867	23.6649	23.7695	24.2244	23.9933		2 Biotin (K)	0	2			79275000	1.78e-05	161.94	94.693	1	3	2	2052.03	31.411	LKSDIGNFKNSLHK	222	NaN	NaN	NaN		NaN	NaN	NaN		1763	1776	_LK(bi)SDIGNFK(bi)NSLHK_;_LK(bi)SDIGNFK(bi)NSLHK_;_LK(bi)SDIGNFK(bi)NSLHK_;_LK(bi)SDIGNFK(bi)NSLHK_;_LK(bi)SDIGNFK(bi)NSLHK_	LK(1)SDIGNFK(1)NSLHK	LK(150.57)SDIGNFK(45.07)NSLHK(-45.07)			_LK(bi)SDIGNFK(bi)NSLHK_
PF3D7_0730900	P. falciparum	EMP1-trafficking protein				23.2034	23.4298	22.1074	22.4966	22.7984	22.7761	28.8712	28.8887	28.5536	28.7421	28.4354	28.5573	2 Biotin (K)	0	2			2634500000	9.78e-17	194.94	112.28	42	NaN	3	2438.21	29.554	LKSDIGNFKNSLHKEEK	222	1	151.39	110.002	+	NaN	NaN	NaN		1763	1779	_LK(bi)SDIGNFKNSLHKEEK_;_LKSDIGNFKNSLHK(bi)EEK_;_LK(bi)SDIGNFKNSLHKEEK_;_LKSDIGNFK(bi)NSLHKEEK_;_LKSDIGNFK(bi)NSLHKEEK_;_LK(bi)SDIGNFKNSLHKEEK_;_LKSDIGNFK(bi)NSLHKEEK_;_LK(bi)SDIGNFKNSLHKEEK_;_LKSDIGNFK(bi)NSLHKEEK_;_LKSDIGNFKNSLHK(bi)EEK_;_LKSDIGNFK(bi)NSLHKEEK_;_LKSDIGNFK(bi)NSLHKEEK_;_LK(bi)SDIGNFKNSLHKEEK_;_LKSDIGNFKNSLHK(bi)EEK_;_LKSDIGNFK(bi)NSLHKEEK_;_LKSDIGNFK(bi)NSLHKEEK_;_LKSDIGNFK(bi)N…	LK(0.999)SDIGNFK(0.001)NSLHKEEK;LKSDIGNFK(0.243)NSLHK(0.733)EEK(0.024);LK(0.999)SDIGNFK(0.001)NSLHKEEK;LKSDIGNFK(0.747)NSLHK(0.247)EEK(0.006);LKSDIGNFK(0.661)NSLHK(0.339)EEK;LK(1)SDIGNFKNSLHKEEK;LKSDIGNFK(1)NSLHKEEK;LK(0.999)SDIGNFK(0.001)NSLHKEEK;LKSDIGNFK(0.827)NSLHK(0.172)EEK(0.001);LKSDIGNFK(0.353)NSLHK(0.633)EEK(0.014);LK(0.003)SDIGNFK(0.783)NSLHK(0.189)EEK(0.025);LKSDIGNFK(0.912)NSLHK(0.088…	LK(28.98)SDIGNFK(-28.98)NSLHK(-58.59)EEK(-81.07);LK(-43.63)SDIGNFK(-4.79)NSLHK(4.79)EEK(-14.92);LK(30.49)SDIGNFK(-30.49)NSLHK(-54.4)EEK(-66.85);LK(-65.1)SDIGNFK(4.81)NSLHK(-4.81)EEK(-20.93);LK(-64.57)SDIGNFK(2.9)NSLHK(-2.9)EEK(-34.88);LK(33.6)SDIGNFK(-33.6)NSLHK(-45.22)EEK(-51.1);LK(-44.93)SDIGNFK(34.65)NSLHK(-34.65)EEK(-58.93);LK(28.82)SDIGNFK(-28.82)NSLHK(-52.61)EEK(-55.82);LK(-45.82)SDIGNFK(6.…			_LK(bi)SDIGNFKNSLHKEEK_;_LKSDIGNFKNSLHK(bi)EEK_;_LKSDIGNFK(bi)NSLHKEEK_;_LK(bi)SDIGNFK(bi)NSLHKEEK_;_LK(bi)SDIGNFKNSLHK(bi)EEK_
PF3D7_0704600	P. falciparum	E3 ubiquitin-protein ligase				21.2667	20.874				21.1779							2 Biotin (K)	0	2			6817100	0.040486	53.211	6.8334	0	4	2	1816.87	26.2	LLDKTFEDEKK	204	NaN	NaN	NaN		NaN	NaN	NaN		3404	3414	_LLDK(bi)TFEDEK(bi)K_;_LLDK(bi)TFEDEK(bi)K_;_LLDK(bi)TFEDEK(bi)K_	LLDK(1)TFEDEK(0.814)K(0.186)	LLDK(50.06)TFEDEK(6.41)K(-6.41)			_LLDK(bi)TFEDEK(bi)K_
PF3D7_0936800	P. falciparum	Plasmodium exported protein (PHISTc), unknown function				20.986			22.307	21.9347	21.8505							2 Biotin (K)	0	2			15056000	2.29e-06	155.66	78.904	8	3	2	2265.19	20.705	LQQHKVQPPKVQQQK	272	1	120.9	97.9847	+	NaN	NaN	NaN		298	312	_LQQHK(bi)VQPPKVQQQK_;_LQQHK(bi)VQPPKVQQQK_;_LQQHK(bi)VQPPKVQQQK_;_LQQHK(bi)VQPPKVQQQK_;_LQQHK(bi)VQPPKVQQQK_;_LQQHK(bi)VQPPKVQQQK_;_LQQHK(bi)VQPPKVQQQK_;_LQQHK(bi)VQPPKVQQQK_;_LQQHK(bi)VQPPKVQQQK_;_LQQHK(bi)VQPPKVQQQK_;_LQQHK(bi)VQPPKVQQQK_;_LQQHK(bi)VQPPKVQQQK_;_LQQHK(bi)VQPPKVQQQK_;_LQQHK(bi)VQPPKVQQQK_;_LQQHK(bi)VQPPK(bi)VQQQK_;_LQQHK(bi)VQPPK(bi)VQQQK_;_LQQHK(bi)VQPPK(bi)VQQQK_;_LQQHK(bi)VQP…	LQQHK(1)VQPPKVQQQK;LQQHK(0.999)VQPPK(0.001)VQQQK(0.001);LQQHK(1)VQPPKVQQQK;LQQHK(1)VQPPKVQQQK;LQQHK(1)VQPPKVQQQK;LQQHK(1)VQPPKVQQQK;LQQHK(1)VQPPKVQQQK;LQQHK(1)VQPPKVQQQK;LQQHK(1)VQPPKVQQQK;LQQHK(1)VQPPKVQQQK;LQQHK(1)VQPPK(0.999)VQQQK(0.001);LQQHK(1)VQPPK(0.967)VQQQK(0.033);LQQHK(1)VQPPK(0.992)VQQQK(0.008);LQQHK(1)VQPPK(1)VQQQK;LQQHK(1)VQPPK(0.908)VQQQK(0.092);LQQHK(1)VQPPK(1)VQQQK	LQQHK(78.59)VQPPK(-78.59)VQQQK(-96.17);LQQHK(32.11)VQPPK(-32.11)VQQQK(-32.11);LQQHK(56.57)VQPPK(-56.97)VQQQK(-56.57);LQQHK(46.45)VQPPK(-46.95)VQQQK(-46.45);LQQHK(35.13)VQPPK(-35.13)VQQQK(-51.94);LQQHK(43.41)VQPPK(-53.83)VQQQK(-43.41);LQQHK(74.52)VQPPK(-74.52)VQQQK(-84.87);LQQHK(45.61)VQPPK(-50.73)VQQQK(-45.61);LQQHK(56.53)VQPPK(-56.53)VQQQK(-61.87);LQQHK(51.99)VQPPK(-51.99)VQQQK(-62.3);LQQHK(81.8…			_LQQHK(bi)VQPPKVQQQK_;_LQQHK(bi)VQPPK(bi)VQQQK_
PF3D7_0730900	P. falciparum	EMP1-trafficking protein										22.9451	23.0678	22.8435	22.5923	22.8062	22.9339	2 Biotin (K)	0	2			46064000	7.29e-16	158.99	115.66	14	3	2	2927.4	37.265	LSVNEFENNDDVGLKKEISTPK	222	0.999825	89.977	41.8909	+	NaN	NaN	NaN		746	767	_LSVNEFENNDDVGLKK(bi)EISTPK_;_LSVNEFENNDDVGLKK(bi)EISTPK_;_LSVNEFENNDDVGLK(bi)KEISTPK_;_LSVNEFENNDDVGLK(bi)KEISTPK_;_LSVNEFENNDDVGLK(bi)KEISTPK_;_LSVNEFENNDDVGLKK(bi)EISTPK_;_LSVNEFENNDDVGLK(bi)KEISTPK_;_LSVNEFENNDDVGLK(bi)KEISTPK_;_LSVNEFENNDDVGLKK(bi)EISTPK_;_LSVNEFENNDDVGLKK(bi)EISTPK_;_LSVNEFENNDDVGLKK(bi)EISTPK_;_LSVNEFENNDDVGLKK(bi)EISTPK_;_LSVNEFENNDDVGLKK(bi)EISTPK_;_LSVNEFENNDDVGLK(bi)KE…	LSVNEFENNDDVGLK(0.16)K(0.84)EISTPK;LSVNEFENNDDVGLK(0.295)K(0.679)EISTPK(0.026);LSVNEFENNDDVGLK(0.643)K(0.351)EISTPK(0.005);LSVNEFENNDDVGLK(0.553)K(0.397)EISTPK(0.049);LSVNEFENNDDVGLK(0.638)K(0.357)EISTPK(0.006);LSVNEFENNDDVGLK(0.343)K(0.657)EISTPK;LSVNEFENNDDVGLK(0.645)K(0.355)EISTPK;LSVNEFENNDDVGLK(0.529)K(0.471)EISTPK;LSVNEFENNDDVGLK(0.205)K(0.794)EISTPK(0.001);LSVNEFENNDDVGLK(0.181)K(0.806)EIS…	LSVNEFENNDDVGLK(-7.22)K(7.22)EISTPK(-38.84);LSVNEFENNDDVGLK(-3.62)K(3.62)EISTPK(-14.21);LSVNEFENNDDVGLK(2.63)K(-2.63)EISTPK(-20.7);LSVNEFENNDDVGLK(1.44)K(-1.44)EISTPK(-10.51);LSVNEFENNDDVGLK(2.52)K(-2.52)EISTPK(-20.41);LSVNEFENNDDVGLK(-2.82)K(2.82)EISTPK(-32.9);LSVNEFENNDDVGLK(2.6)K(-2.6)EISTPK(-32.76);LSVNEFENNDDVGLK(0.5)K(-0.5)EISTPK(-34.87);LSVNEFENNDDVGLK(-5.89)K(5.89)EISTPK(-29.65);LSVNEFENN…			_LSVNEFENNDDVGLKK(bi)EISTPK_;_LSVNEFENNDDVGLK(bi)KEISTPK_;_LSVNEFENNDDVGLK(bi)K(bi)EISTPK_
PF3D7_0730900	P. falciparum	EMP1-trafficking protein					23.1423	22.0125	23.5522	23.4923	23.0232	28.5052	28.5278	28.3109	28.2308	28.1556	28.5463	2 Biotin (K)	0	2			2154200000	9.03e-28	191.44	143.11	75	NaN	2	2939.42	37.402	LSVNEFENNDDVGLKKEVSVPR	222	1	100.14	100.138	+	NaN	NaN	NaN		680	701	_LSVNEFENNDDVGLKK(bi)EVSVPR_;_LSVNEFENNDDVGLKK(bi)EVSVPR_;_LSVNEFENNDDVGLK(bi)KEVSVPR_;_LSVNEFENNDDVGLK(bi)KEVSVPR_;_LSVNEFENNDDVGLKK(bi)EVSVPR_;_LSVNEFENNDDVGLKK(bi)EVSVPR_;_LSVNEFENNDDVGLKK(bi)EVSVPR_;_LSVNEFENNDDVGLKK(bi)EVSVPR_;_LSVNEFENNDDVGLKK(bi)EVSVPR_;_LSVNEFENNDDVGLKK(bi)EVSVPR_;_LSVNEFENNDDVGLKK(bi)EVSVPR_;_LSVNEFENNDDVGLKK(bi)EVSVPR_;_LSVNEFENNDDVGLKK(bi)EVSVPR_;_LSVNEFENNDDVGLKK(bi)E…	LSVNEFENNDDVGLK(0.123)K(0.877)EVSVPR;LSVNEFENNDDVGLK(0.051)K(0.949)EVSVPR;LSVNEFENNDDVGLK(0.628)K(0.372)EVSVPR;LSVNEFENNDDVGLK(0.702)K(0.298)EVSVPR;LSVNEFENNDDVGLK(0.195)K(0.805)EVSVPR;LSVNEFENNDDVGLK(0.216)K(0.784)EVSVPR;LSVNEFENNDDVGLK(0.093)K(0.907)EVSVPR;LSVNEFENNDDVGLK(0.03)K(0.97)EVSVPR;LSVNEFENNDDVGLK(0.24)K(0.76)EVSVPR;LSVNEFENNDDVGLK(0.103)K(0.897)EVSVPR;LSVNEFENNDDVGLK(0.03)K(0.97)EVSVP…	LSVNEFENNDDVGLK(-8.54)K(8.54)EVSVPR;LSVNEFENNDDVGLK(-12.74)K(12.74)EVSVPR;LSVNEFENNDDVGLK(2.27)K(-2.27)EVSVPR;LSVNEFENNDDVGLK(3.72)K(-3.72)EVSVPR;LSVNEFENNDDVGLK(-6.15)K(6.15)EVSVPR;LSVNEFENNDDVGLK(-5.59)K(5.59)EVSVPR;LSVNEFENNDDVGLK(-9.87)K(9.87)EVSVPR;LSVNEFENNDDVGLK(-15.08)K(15.08)EVSVPR;LSVNEFENNDDVGLK(-5.01)K(5.01)EVSVPR;LSVNEFENNDDVGLK(-9.42)K(9.42)EVSVPR;LSVNEFENNDDVGLK(-15.12)K(15.12)EVSV…			_LSVNEFENNDDVGLKK(bi)EVSVPR_;_LSVNEFENNDDVGLK(bi)KEVSVPR_;_LSVNEFENNDDVGLK(bi)K(bi)EVSVPR_
PF3D7_0730900	P. falciparum	EMP1-trafficking protein										23.2678	23.2203	22.9429	23.0185	23.0332	22.8723	2 Biotin (K)	0	2			52694000	0.0024259	90.464	64.588	12	3	2	2900.39	37.998	LSVSEFENNDDVGLKKEISTPK	222	0.99995	86.357	45.5234	+	NaN	NaN	NaN		856	877	_LSVSEFENNDDVGLK(bi)KEISTPK_;_LSVSEFENNDDVGLKK(bi)EISTPK_;_LSVSEFENNDDVGLKK(bi)EISTPK_;_LSVSEFENNDDVGLKK(bi)EISTPK_;_LSVSEFENNDDVGLKK(bi)EISTPK_;_LSVSEFENNDDVGLKK(bi)EISTPK_;_LSVSEFENNDDVGLK(bi)KEISTPK_;_LSVSEFENNDDVGLKK(bi)EISTPK_;_LSVSEFENNDDVGLKK(bi)EISTPK_;_LSVSEFENNDDVGLKK(bi)EISTPK_;_LSVSEFENNDDVGLK(bi)KEISTPK_;_LSVSEFENNDDVGLKK(bi)EISTPK_;_LSVSEFENNDDVGLKK(bi)EISTPK_;_LSVSEFENNDDVGLK(bi)KE…	LSVSEFENNDDVGLK(0.639)K(0.361)EISTPK;LSVSEFENNDDVGLK(0.221)K(0.778)EISTPK(0.001);LSVSEFENNDDVGLK(0.174)K(0.826)EISTPK;LSVSEFENNDDVGLK(0.223)K(0.776)EISTPK(0.001);LSVSEFENNDDVGLK(0.158)K(0.842)EISTPK;LSVSEFENNDDVGLK(0.182)K(0.818)EISTPK;LSVSEFENNDDVGLK(0.646)K(0.354)EISTPK;LSVSEFENNDDVGLK(0.281)K(0.719)EISTPK;LSVSEFENNDDVGLK(0.221)K(0.778)EISTPK;LSVSEFENNDDVGLK(0.044)K(0.956)EISTPK;LSVSEFENNDDVGLK…	LSVSEFENNDDVGLK(2.48)K(-2.48)EISTPK(-41.32);LSVSEFENNDDVGLK(-5.46)K(5.46)EISTPK(-31.3);LSVSEFENNDDVGLK(-6.77)K(6.77)EISTPK(-47.14);LSVSEFENNDDVGLK(-5.42)K(5.42)EISTPK(-30.94);LSVSEFENNDDVGLK(-7.28)K(7.28)EISTPK(-39.33);LSVSEFENNDDVGLK(-6.52)K(6.52)EISTPK(-38.14);LSVSEFENNDDVGLK(2.61)K(-2.61)EISTPK(-51.4);LSVSEFENNDDVGLK(-4.08)K(4.08)EISTPK(-32.69);LSVSEFENNDDVGLK(-5.46)K(5.46)EISTPK(-39.23);LSVSE…			_LSVSEFENNDDVGLK(bi)KEISTPK_;_LSVSEFENNDDVGLKK(bi)EISTPK_;_LSVSEFENNDDVGLK(bi)K(bi)EISTPK_
PF3D7_0730900	P. falciparum	EMP1-trafficking protein					21.8411		22.6298	22.4645	21.6578	27.2714	27.4785	27.341	27.2535	27.2535	27.341	2 Biotin (K)	0	2			1030200000	4.54e-13	152.51	92.267	56	NaN	2	2912.4	38.075	LSVSEFENNDDVGLKKEVSVPR	222	1	113.36	113.359	+	NaN	NaN	NaN		724	745	_LSVSEFENNDDVGLKK(bi)EVSVPR_;_LSVSEFENNDDVGLKK(bi)EVSVPR_;_LSVSEFENNDDVGLKK(bi)EVSVPR_;_LSVSEFENNDDVGLKK(bi)EVSVPR_;_LSVSEFENNDDVGLKK(bi)EVSVPR_;_LSVSEFENNDDVGLKK(bi)EVSVPR_;_LSVSEFENNDDVGLKK(bi)EVSVPR_;_LSVSEFENNDDVGLKK(bi)EVSVPR_;_LSVSEFENNDDVGLKK(bi)EVSVPR_;_LSVSEFENNDDVGLKK(bi)EVSVPR_;_LSVSEFENNDDVGLKK(bi)EVSVPR_;_LSVSEFENNDDVGLKK(bi)EVSVPR_;_LSVSEFENNDDVGLKK(bi)EVSVPR_;_LSVSEFENNDDVGLKK(bi)E…	LSVSEFENNDDVGLK(0.158)K(0.842)EVSVPR;LSVSEFENNDDVGLK(0.011)K(0.989)EVSVPR;LSVSEFENNDDVGLK(0.181)K(0.819)EVSVPR;LSVSEFENNDDVGLK(0.164)K(0.836)EVSVPR;LSVSEFENNDDVGLK(0.165)K(0.835)EVSVPR;LSVSEFENNDDVGLK(0.158)K(0.842)EVSVPR;LSVSEFENNDDVGLK(0.004)K(0.996)EVSVPR;LSVSEFENNDDVGLK(0.163)K(0.837)EVSVPR;LSVSEFENNDDVGLK(0.201)K(0.799)EVSVPR;LSVSEFENNDDVGLK(0.158)K(0.842)EVSVPR;LSVSEFENNDDVGLK(0.247)K(0.753…	LSVSEFENNDDVGLK(-7.28)K(7.28)EVSVPR;LSVSEFENNDDVGLK(-19.43)K(19.43)EVSVPR;LSVSEFENNDDVGLK(-6.55)K(6.55)EVSVPR;LSVSEFENNDDVGLK(-7.07)K(7.07)EVSVPR;LSVSEFENNDDVGLK(-7.04)K(7.04)EVSVPR;LSVSEFENNDDVGLK(-7.26)K(7.26)EVSVPR;LSVSEFENNDDVGLK(-24.07)K(24.07)EVSVPR;LSVSEFENNDDVGLK(-7.1)K(7.1)EVSVPR;LSVSEFENNDDVGLK(-6)K(6)EVSVPR;LSVSEFENNDDVGLK(-7.26)K(7.26)EVSVPR;LSVSEFENNDDVGLK(-4.83)K(4.83)EVSVPR;LSVSEFE…			_LSVSEFENNDDVGLKK(bi)EVSVPR_;_LSVSEFENNDDVGLK(bi)KEVSVPR_;_LSVSEFENNDDVGLK(bi)K(bi)EVSVPR_
PF3D7_0730900	P. falciparum	EMP1-trafficking protein										25.5014	25.5783	25.918	25.4008	25.4105	25.5492	2 Biotin (K)	0	2			299020000	1.73e-31	209.23	144.39	26	NaN	2	2892.34	35.631	LSVSEFKNNDDVSLNKESYPR	222	NaN	NaN	NaN		NaN	NaN	NaN		966	986	_LSVSEFKNNDDVSLNK(bi)ESYPR_;_LSVSEFK(bi)NNDDVSLNKESYPR_;_LSVSEFKNNDDVSLNK(bi)ESYPR_;_LSVSEFK(bi)NNDDVSLNKESYPR_;_LSVSEFKNNDDVSLNK(bi)ESYPR_;_LSVSEFK(bi)NNDDVSLNKESYPR_;_LSVSEFKNNDDVSLNK(bi)ESYPR_;_LSVSEFK(bi)NNDDVSLNKESYPR_;_LSVSEFKNNDDVSLNK(bi)ESYPR_;_LSVSEFK(bi)NNDDVSLNKESYPR_;_LSVSEFKNNDDVSLNK(bi)ESYPR_;_LSVSEFK(bi)NNDDVSLNKESYPR_;_LSVSEFKNNDDVSLNK(bi)ESYPR_;_LSVSEFK(bi)NNDDVSLNKESYPR_;_LSVSEF…	LSVSEFKNNDDVSLNK(1)ESYPR;LSVSEFK(1)NNDDVSLNKESYPR;LSVSEFKNNDDVSLNK(1)ESYPR;LSVSEFK(1)NNDDVSLNKESYPR;LSVSEFKNNDDVSLNK(1)ESYPR;LSVSEFK(1)NNDDVSLNKESYPR;LSVSEFKNNDDVSLNK(1)ESYPR;LSVSEFK(1)NNDDVSLNKESYPR;LSVSEFKNNDDVSLNK(1)ESYPR;LSVSEFK(1)NNDDVSLNKESYPR;LSVSEFKNNDDVSLNK(1)ESYPR;LSVSEFK(1)NNDDVSLNKESYPR;LSVSEFKNNDDVSLNK(1)ESYPR;LSVSEFK(1)NNDDVSLNKESYPR;LSVSEFK(1)NNDDVSLNKESYPR;LSVSEFK(1)NNDDVSLNKESYPR…	LSVSEFK(-109.21)NNDDVSLNK(109.21)ESYPR;LSVSEFK(123.62)NNDDVSLNK(-123.62)ESYPR;LSVSEFK(-158.33)NNDDVSLNK(158.33)ESYPR;LSVSEFK(115.35)NNDDVSLNK(-115.35)ESYPR;LSVSEFK(-130.64)NNDDVSLNK(130.64)ESYPR;LSVSEFK(142.59)NNDDVSLNK(-142.59)ESYPR;LSVSEFK(-124.02)NNDDVSLNK(124.02)ESYPR;LSVSEFK(116.85)NNDDVSLNK(-116.85)ESYPR;LSVSEFK(-168.57)NNDDVSLNK(168.57)ESYPR;LSVSEFK(96.92)NNDDVSLNK(-96.92)ESYPR;LSVSEFK(-13…			_LSVSEFKNNDDVSLNK(bi)ESYPR_;_LSVSEFK(bi)NNDDVSLNKESYPR_;_LSVSEFK(bi)NNDDVSLNK(bi)ESYPR_
PF3D7_0730900	P. falciparum	EMP1-trafficking protein										22.2325	23.0574	22.3685	21.6844		22.2784	2 Biotin (K)	0	2			27529000	3.45e-09	131.25	85.363	10	3	3	3048.44	32.365	LSVSEFKNNDDVSLNKESYPRR	222	1	131.25	131.249	+	NaN	NaN	NaN		966	987	_LSVSEFK(bi)NNDDVSLNKESYPRR_;_LSVSEFK(bi)NNDDVSLNKESYPRR_;_LSVSEFK(bi)NNDDVSLNKESYPRR_;_LSVSEFK(bi)NNDDVSLNKESYPRR_;_LSVSEFK(bi)NNDDVSLNKESYPRR_;_LSVSEFK(bi)NNDDVSLNKESYPRR_;_LSVSEFK(bi)NNDDVSLNK(bi)ESYPRR_;_LSVSEFK(bi)NNDDVSLNK(bi)ESYPRR_;_LSVSEFK(bi)NNDDVSLNK(bi)ESYPRR_;_LSVSEFK(bi)NNDDVSLNK(bi)ESYPRR_;_LSVSEFK(bi)NNDDVSLNK(bi)ESYPRR_	LSVSEFK(1)NNDDVSLNKESYPRR;LSVSEFK(1)NNDDVSLNKESYPRR;LSVSEFK(1)NNDDVSLNKESYPRR;LSVSEFK(1)NNDDVSLNKESYPRR;LSVSEFK(1)NNDDVSLNKESYPRR;LSVSEFK(1)NNDDVSLNKESYPRR;LSVSEFK(1)NNDDVSLNK(1)ESYPRR;LSVSEFK(1)NNDDVSLNK(1)ESYPRR;LSVSEFK(1)NNDDVSLNK(1)ESYPRR;LSVSEFK(1)NNDDVSLNK(1)ESYPRR	LSVSEFK(67.22)NNDDVSLNK(-67.22)ESYPRR;LSVSEFK(38.15)NNDDVSLNK(-38.15)ESYPRR;LSVSEFK(36.92)NNDDVSLNK(-36.92)ESYPRR;LSVSEFK(48.08)NNDDVSLNK(-48.08)ESYPRR;LSVSEFK(38.4)NNDDVSLNK(-38.4)ESYPRR;LSVSEFK(48.67)NNDDVSLNK(-48.67)ESYPRR;LSVSEFK(94.45)NNDDVSLNK(94.45)ESYPRR;LSVSEFK(126.14)NNDDVSLNK(126.14)ESYPRR;LSVSEFK(105.2)NNDDVSLNK(105.2)ESYPRR;LSVSEFK(131.25)NNDDVSLNK(131.25)ESYPRR			_LSVSEFK(bi)NNDDVSLNKESYPRR_;_LSVSEFK(bi)NNDDVSLNK(bi)ESYPRR_
PF3D7_0730900	P. falciparum	EMP1-trafficking protein										23.5165	23.48	23.4041	23.0655	22.965	23.5754	2 Biotin (K)	0	2			64296000	2.23e-08	164.7	102.26	14	NaN	2	2337.1	40.257	LSVSEFKNNFDGCLKK	222	NaN	NaN	NaN		NaN	NaN	NaN		900	915	_LSVSEFK(bi)NNFDGCLKK_;_LSVSEFK(bi)NNFDGCLKK_;_LSVSEFK(bi)NNFDGCLKK_;_LSVSEFK(bi)NNFDGCLKK_;_LSVSEFK(bi)NNFDGCLKK_;_LSVSEFK(bi)NNFDGCLKK_;_LSVSEFK(bi)NNFDGCLKK_;_LSVSEFK(bi)NNFDGCLKK_;_LSVSEFKNNFDGCLK(bi)K_;_LSVSEFK(bi)NNFDGCLKK_;_LSVSEFK(bi)NNFDGCLKK_;_LSVSEFK(bi)NNFDGCLKK_;_LSVSEFK(bi)NNFDGCLKK_;_LSVSEFK(bi)NNFDGCLKK_;_LSVSEFKNNFDGCLK(bi)K_;_LSVSEFK(bi)NNFDGCLKK_;_LSVSEFK(bi)NNFDGCLKK_;_LSVSEFK…	LSVSEFK(1)NNFDGCLKK;LSVSEFK(1)NNFDGCLKK;LSVSEFK(1)NNFDGCLKK;LSVSEFK(1)NNFDGCLKK;LSVSEFK(1)NNFDGCLKK;LSVSEFK(1)NNFDGCLKK;LSVSEFK(1)NNFDGCLKK;LSVSEFK(1)NNFDGCLKK;LSVSEFKNNFDGCLK(0.577)K(0.423);LSVSEFK(0.998)NNFDGCLK(0.001)K(0.001);LSVSEFK(1)NNFDGCLKK;LSVSEFK(1)NNFDGCLKK;LSVSEFK(1)NNFDGCLKK;LSVSEFK(1)NNFDGCLKK;LSVSEFKNNFDGCLK(0.5)K(0.5);LSVSEFK(0.999)NNFDGCLK(0.001)K(0.001);LSVSEFK(1)NNFDGCLKK;LSVSE…	LSVSEFK(76.04)NNFDGCLK(-76.04)K(-76.04);LSVSEFK(96.4)NNFDGCLK(-96.4)K(-96.4);LSVSEFK(65.17)NNFDGCLK(-65.17)K(-65.17);LSVSEFK(41.94)NNFDGCLK(-41.94)K(-41.94);LSVSEFK(73.66)NNFDGCLK(-73.66)K(-73.66);LSVSEFK(79.96)NNFDGCLK(-79.96)K(-79.96);LSVSEFK(61.95)NNFDGCLK(-61.95)K(-67.48);LSVSEFK(54.26)NNFDGCLK(-54.26)K(-61.01);LSVSEFK(-55.08)NNFDGCLK(1.34)K(-1.34);LSVSEFK(30.88)NNFDGCLK(-30.88)K(-30.88);LSVS…			_LSVSEFK(bi)NNFDGCLKK_;_LSVSEFKNNFDGCLK(bi)K_;_LSVSEFK(bi)NNFDGCLKK(bi)_;_LSVSEFK(bi)NNFDGCLK(bi)K_
PF3D7_0730900	P. falciparum	EMP1-trafficking protein							23.9043	23.1621	23.0512	24.2678	25.1757		24.6757	24.2244	25.6595	2 Biotin (K)	0	2			191320000	1.36e-18	166.34	131.06	20	3	3	3004.46	40.892	LSVSEFKNNFDGCLKKEVSVPR	222	1	103.25	103.253	+	NaN	NaN	NaN		900	921	_LSVSEFKNNFDGCLKK(bi)EVSVPR_;_LSVSEFKNNFDGCLKK(bi)EVSVPR_;_LSVSEFKNNFDGCLKK(bi)EVSVPR_;_LSVSEFKNNFDGCLKK(bi)EVSVPR_;_LSVSEFKNNFDGCLKK(bi)EVSVPR_;_LSVSEFKNNFDGCLKK(bi)EVSVPR_;_LSVSEFKNNFDGCLKK(bi)EVSVPR_;_LSVSEFKNNFDGCLKK(bi)EVSVPR_;_LSVSEFKNNFDGCLKK(bi)EVSVPR_;_LSVSEFKNNFDGCLKK(bi)EVSVPR_;_LSVSEFKNNFDGCLKK(bi)EVSVPR_;_LSVSEFKNNFDGCLKK(bi)EVSVPR_;_LSVSEFK(bi)NNFDGCLKK(bi)EVSVPR_;_LSVSEFK(bi)NNFDGC…	LSVSEFKNNFDGCLK(0.017)K(0.983)EVSVPR;LSVSEFKNNFDGCLK(0.222)K(0.778)EVSVPR;LSVSEFKNNFDGCLK(0.032)K(0.968)EVSVPR;LSVSEFKNNFDGCLK(0.076)K(0.924)EVSVPR;LSVSEFKNNFDGCLK(0.016)K(0.984)EVSVPR;LSVSEFKNNFDGCLK(0.004)K(0.996)EVSVPR;LSVSEFKNNFDGCLK(0.344)K(0.656)EVSVPR;LSVSEFK(1)NNFDGCLK(0.225)K(0.775)EVSVPR;LSVSEFK(1)NNFDGCLK(0.174)K(0.826)EVSVPR;LSVSEFK(1)NNFDGCLK(0.038)K(0.962)EVSVPR;LSVSEFK(1)NNFDGCLK(0…	LSVSEFK(-69.3)NNFDGCLK(-17.68)K(17.68)EVSVPR;LSVSEFK(-55.95)NNFDGCLK(-5.44)K(5.44)EVSVPR;LSVSEFK(-70.87)NNFDGCLK(-14.76)K(14.76)EVSVPR;LSVSEFK(-66.37)NNFDGCLK(-10.82)K(10.82)EVSVPR;LSVSEFK(-98.53)NNFDGCLK(-17.87)K(17.87)EVSVPR;LSVSEFK(-111.64)NNFDGCLK(-24.16)K(24.16)EVSVPR;LSVSEFK(-96.02)NNFDGCLK(-2.8)K(2.8)EVSVPR;LSVSEFK(69.96)NNFDGCLK(-5.38)K(5.38)EVSVPR;LSVSEFK(70.72)NNFDGCLK(-6.78)K(6.78)EVSV…			_LSVSEFKNNFDGCLKK(bi)EVSVPR_;_LSVSEFK(bi)NNFDGCLKK(bi)EVSVPR_;_LSVSEFK(bi)NNFDGCLK(bi)K(bi)EVSVPR_
PF3D7_1314200	P. falciparum	telomerase reverse transcriptase				24.654	24.5404	23.9316	25.5463	24.3578	24.2607							2 Biotin (K)	0	2			157500000	0.0084125	112.83	18.471	4	2	2	1628.77	25.762	MAKEEKSNIK	381	NaN	NaN	NaN		NaN	NaN	NaN		1233	1242	_MAK(bi)EEK(bi)SNIK_;_MAK(bi)EEK(bi)SNIK_;_MAK(bi)EEK(bi)SNIK_;_MAK(bi)EEK(bi)SNIK_;_MAK(bi)EEK(bi)SNIK_;_MAK(bi)EEK(bi)SNIK_	MAK(1)EEK(0.792)SNIK(0.209);MAK(0.999)EEK(0.792)SNIK(0.209);MAK(1)EEK(0.822)SNIK(0.178);MAK(1)EEK(0.815)SNIK(0.185)	MAK(34.89)EEK(5.79)SNIK(-5.79);MAK(29.2)EEK(5.81)SNIK(-5.81);MAK(36.89)EEK(6.65)SNIK(-6.65);MAK(38.95)EEK(6.43)SNIK(-6.43)			_MAK(bi)EEK(bi)SNIK_
PF3D7_0730900	P. falciparum	EMP1-trafficking protein										26.7771	26.574	26.3894	27.1312	26.5551	26.604	2 Biotin (K)	0	2			651130000	1.08e-21	234.36	167.92	35	NaN	2	2426.1	23.976	NEHHEDHLKGKFVDNR	222	NaN	NaN	NaN		NaN	NaN	NaN		1866	1881	_NEHHEDHLKGK(bi)FVDNR_;_NEHHEDHLKGK(bi)FVDNR_;_NEHHEDHLKGK(bi)FVDNR_;_NEHHEDHLKGK(bi)FVDNR_;_NEHHEDHLK(bi)GKFVDNR_;_NEHHEDHLK(bi)GKFVDNR_;_NEHHEDHLK(bi)GKFVDNR_;_NEHHEDHLKGK(bi)FVDNR_;_NEHHEDHLKGK(bi)FVDNR_;_NEHHEDHLKGK(bi)FVDNR_;_NEHHEDHLK(bi)GKFVDNR_;_NEHHEDHLK(bi)GKFVDNR_;_NEHHEDHLKGK(bi)FVDNR_;_NEHHEDHLKGK(bi)FVDNR_;_NEHHEDHLKGK(bi)FVDNR_;_NEHHEDHLKGK(bi)FVDNR_;_NEHHEDHLKGK(bi)FVDNR_;_NEHHEDH…	NEHHEDHLK(0.152)GK(0.848)FVDNR;NEHHEDHLK(0.246)GK(0.754)FVDNR;NEHHEDHLK(0.043)GK(0.957)FVDNR;NEHHEDHLK(0.081)GK(0.919)FVDNR;NEHHEDHLK(0.5)GK(0.5)FVDNR;NEHHEDHLK(0.661)GK(0.339)FVDNR;NEHHEDHLK(0.666)GK(0.334)FVDNR;NEHHEDHLK(0.235)GK(0.765)FVDNR;NEHHEDHLK(0.074)GK(0.926)FVDNR;NEHHEDHLK(0.186)GK(0.814)FVDNR;NEHHEDHLK(0.5)GK(0.5)FVDNR;NEHHEDHLK(0.5)GK(0.5)FVDNR;NEHHEDHLK(0.048)GK(0.952)FVDNR;NEHHEDHL…	NEHHEDHLK(-7.45)GK(7.45)FVDNR;NEHHEDHLK(-4.87)GK(4.87)FVDNR;NEHHEDHLK(-13.51)GK(13.51)FVDNR;NEHHEDHLK(-10.52)GK(10.52)FVDNR;NEHHEDHLK(0)GK(0)FVDNR;NEHHEDHLK(2.91)GK(-2.91)FVDNR;NEHHEDHLK(3)GK(-3)FVDNR;NEHHEDHLK(-5.14)GK(5.14)FVDNR;NEHHEDHLK(-10.96)GK(10.96)FVDNR;NEHHEDHLK(-6.4)GK(6.4)FVDNR;NEHHEDHLK(0)GK(0)FVDNR;NEHHEDHLK(0)GK(0)FVDNR;NEHHEDHLK(-13.01)GK(13.01)FVDNR;NEHHEDHLK(-2.14)GK(2.14)FVDNR;…			_NEHHEDHLKGK(bi)FVDNR_;_NEHHEDHLK(bi)GKFVDNR_;_NEHHEDHLK(bi)GK(bi)FVDNR_
PF3D7_0730900	P. falciparum	EMP1-trafficking protein										24.4041	24.6209	24.0275	24.824	24.2821	24.4298	2 Biotin (K)	0	2			137810000	2.01e-16	183.6	136.52	17	NaN	3	2683.24	21.755	NEHHEDHLKGKFVDNREK	222	NaN	NaN	NaN		NaN	NaN	NaN		1866	1883	_NEHHEDHLKGK(bi)FVDNREK_;_NEHHEDHLKGKFVDNREK(bi)_;_NEHHEDHLKGK(bi)FVDNREK_;_NEHHEDHLKGK(bi)FVDNREK_;_NEHHEDHLKGK(bi)FVDNREK_;_NEHHEDHLKGK(bi)FVDNREK_;_NEHHEDHLK(bi)GKFVDNREK_;_NEHHEDHLKGK(bi)FVDNREK_;_NEHHEDHLKGK(bi)FVDNREK_;_NEHHEDHLKGK(bi)FVDNREK_;_NEHHEDHLKGK(bi)FVDNREK_;_NEHHEDHLKGK(bi)FVDNREK_;_NEHHEDHLKGK(bi)FVDNREK_;_NEHHEDHLKGK(bi)FVDNREK_;_NEHHEDHLKGK(bi)FVDNREK_;_NEHHEDHLKGK(bi)FVDNREK_…	NEHHEDHLK(0.161)GK(0.835)FVDNREK(0.004);NEHHEDHLK(0.036)GK(0.31)FVDNREK(0.653);NEHHEDHLK(0.014)GK(0.985)FVDNREK;NEHHEDHLK(0.253)GK(0.423)FVDNREK(0.324);NEHHEDHLK(0.002)GK(0.903)FVDNREK(0.095);NEHHEDHLK(0.003)GK(0.996)FVDNREK(0.001);NEHHEDHLK(0.5)GK(0.5)FVDNREK;NEHHEDHLK(0.1)GK(0.888)FVDNREK(0.012);NEHHEDHLK(0.015)GK(0.859)FVDNREK(0.126);NEHHEDHLK(0.058)GK(0.908)FVDNREK(0.035);NEHHEDHLKGK(0.998)FV…	NEHHEDHLK(-7.14)GK(7.14)FVDNREK(-23.34);NEHHEDHLK(-12.56)GK(-3.23)FVDNREK(3.23);NEHHEDHLK(-18.38)GK(18.38)FVDNREK(-35.62);NEHHEDHLK(-2.22)GK(1.16)FVDNREK(-1.16);NEHHEDHLK(-26.66)GK(9.76)FVDNREK(-9.76);NEHHEDHLK(-25.24)GK(25.24)FVDNREK(-30.55);NEHHEDHLK(0)GK(0)FVDNREK(-36.64);NEHHEDHLK(-9.49)GK(9.49)FVDNREK(-18.72);NEHHEDHLK(-17.55)GK(8.33)FVDNREK(-8.33);NEHHEDHLK(-11.98)GK(11.98)FVDNREK(-14.18);N…			_NEHHEDHLKGK(bi)FVDNREK_;_NEHHEDHLKGKFVDNREK(bi)_;_NEHHEDHLK(bi)GKFVDNREK_;_NEHHEDHLK(bi)GK(bi)FVDNREK_
PF3D7_0730900	P. falciparum	EMP1-trafficking protein										22.6444	22.6608	21.8764	22.5639	22.6069	23.2049	2 Biotin (K)	0	2			39294000	2e-07	122.53	88.882	11	3	2	3791.68	41.925	NFVSEFNSNYDDGINKGSYTTKSYVSEFK	222	1	122.53	89.0797	+	NaN	NaN	NaN		438	466	_NFVSEFNSNYDDGINKGSYTTK(bi)SYVSEFK_;_NFVSEFNSNYDDGINKGSYTTK(bi)SYVSEFK_;_NFVSEFNSNYDDGINKGSYTTK(bi)SYVSEFK_;_NFVSEFNSNYDDGINKGSYTTK(bi)SYVSEFK_;_NFVSEFNSNYDDGINKGSYTTK(bi)SYVSEFK_;_NFVSEFNSNYDDGINKGSYTTK(bi)SYVSEFK_;_NFVSEFNSNYDDGINKGSYTTK(bi)SYVSEFK_;_NFVSEFNSNYDDGINKGSYTTK(bi)SYVSEFK_;_NFVSEFNSNYDDGINKGSYTTK(bi)SYVSEFK_;_NFVSEFNSNYDDGINKGSYTTK(bi)SYVSEFK_;_NFVSEFNSNYDDGINKGSYTTK(bi)SYVSEFK_;_NF…	NFVSEFNSNYDDGINK(0.001)GSYTTK(0.999)SYVSEFK;NFVSEFNSNYDDGINKGSYTTK(1)SYVSEFK;NFVSEFNSNYDDGINK(0.014)GSYTTK(0.985)SYVSEFK(0.001);NFVSEFNSNYDDGINK(0.001)GSYTTK(0.999)SYVSEFK(0.001);NFVSEFNSNYDDGINKGSYTTK(0.996)SYVSEFK(0.004);NFVSEFNSNYDDGINKGSYTTK(1)SYVSEFK;NFVSEFNSNYDDGINKGSYTTK(0.998)SYVSEFK(0.002);NFVSEFNSNYDDGINK(0.006)GSYTTK(0.994)SYVSEFK;NFVSEFNSNYDDGINK(0.001)GSYTTK(0.995)SYVSEFK(0.004);NFVS…	NFVSEFNSNYDDGINK(-30.95)GSYTTK(30.95)SYVSEFK(-34.8);NFVSEFNSNYDDGINK(-56.74)GSYTTK(42.57)SYVSEFK(-42.57);NFVSEFNSNYDDGINK(-18.47)GSYTTK(18.47)SYVSEFK(-29.52);NFVSEFNSNYDDGINK(-32.15)GSYTTK(32.15)SYVSEFK(-32.39);NFVSEFNSNYDDGINK(-40.61)GSYTTK(24.54)SYVSEFK(-24.54);NFVSEFNSNYDDGINK(-38.12)GSYTTK(37.04)SYVSEFK(-37.04);NFVSEFNSNYDDGINK(-52.47)GSYTTK(27.24)SYVSEFK(-27.24);NFVSEFNSNYDDGINK(-22.11)GSYTT…			_NFVSEFNSNYDDGINKGSYTTK(bi)SYVSEFK_;_NFVSEFNSNYDDGINK(bi)GSYTTK(bi)SYVSEFK_
PF3D7_0201900	P. falciparum	erythrocyte membrane protein 3				22.228	22.4271	21.806	22.1168	22.704	22.3744							2 Biotin (K)	0	2			31036000	3.63e-12	169.67	91.348	9	3	2	2469.18	32.41	NKDLKSIGNMEQQNTGLK	116	1	137.85	120.397	+	NaN	NaN	NaN		1313	1330	_NKDLK(bi)SIGNM(ox)EQQNTGLK_;_NKDLK(bi)SIGNM(ox)EQQNTGLK_;_NKDLK(bi)SIGNM(ox)EQQNTGLK_;_NKDLK(bi)SIGNM(ox)EQQNTGLK_;_NKDLK(bi)SIGNM(ox)EQQNTGLK_;_NKDLK(bi)SIGNM(ox)EQQNTGLK_;_NKDLK(bi)SIGNMEQQNTGLK_;_NKDLK(bi)SIGNMEQQNTGLK_;_NKDLK(bi)SIGNMEQQNTGLK_;_NKDLK(bi)SIGNMEQQNTGLK_;_NKDLK(bi)SIGNMEQQNTGLK_;_NKDLK(bi)SIGNMEQQNTGLK_;_NK(bi)DLK(bi)SIGNM(ox)EQQNTGLK_;_NK(bi)DLK(bi)SIGNM(ox)EQQNTGLK_;_NK(bi)DL…	NK(0.005)DLK(0.995)SIGNMEQQNTGLK;NK(0.021)DLK(0.979)SIGNMEQQNTGLK;NK(0.123)DLK(0.877)SIGNMEQQNTGLK;NK(0.001)DLK(0.999)SIGNMEQQNTGLK;NK(0.065)DLK(0.935)SIGNMEQQNTGLK;NK(0.074)DLK(0.926)SIGNMEQQNTGLK;NK(0.004)DLK(0.996)SIGNMEQQNTGLK;NK(0.141)DLK(0.859)SIGNMEQQNTGLK;NK(0.013)DLK(0.987)SIGNMEQQNTGLK;NK(0.053)DLK(0.947)SIGNMEQQNTGLK;NK(0.006)DLK(0.994)SIGNMEQQNTGLK;NK(0.361)DLK(0.639)SIGNMEQQNTGLK;NK(…	NK(-23.1)DLK(23.1)SIGNMEQQNTGLK(-101.58);NK(-16.77)DLK(16.77)SIGNMEQQNTGLK(-132.49);NK(-8.52)DLK(8.52)SIGNMEQQNTGLK(-142.15);NK(-29.86)DLK(29.86)SIGNMEQQNTGLK(-134.92);NK(-11.56)DLK(11.56)SIGNMEQQNTGLK(-120.91);NK(-10.96)DLK(10.96)SIGNMEQQNTGLK(-89.56);NK(-24.36)DLK(24.36)SIGNMEQQNTGLK(-213.35);NK(-7.86)DLK(7.86)SIGNMEQQNTGLK(-144.59);NK(-18.94)DLK(18.94)SIGNMEQQNTGLK(-107.74);NK(-12.52)DLK(12.52…			_NKDLK(bi)SIGNM(ox)EQQNTGLK_;_NKDLK(bi)SIGNMEQQNTGLK_;_NK(bi)DLK(bi)SIGNM(ox)EQQNTGLK_;_NK(bi)DLK(bi)SIGNMEQQNTGLK_
PF3D7_1301400	P. falciparum	Plasmodium exported protein (hyp12), unknown function				23.0755	23.4551	21.9792	24.2244	23.1921	22.9861							2 Biotin (K)	0	2			62001000	2.89e-10	139.28	91.679	20	NaN	2	3198.53	36.287	NMNIPKHNANSEYLLDKNLYDLK	373	1	153.56	118.024	+	NaN	NaN	NaN		175	197	_NMNIPK(bi)HNANSEYLLDK(bi)NLYDLK_;_NMNIPK(bi)HNANSEYLLDK(bi)NLYDLK_;_NMNIPK(bi)HNANSEYLLDK(bi)NLYDLK_;_NMNIPK(bi)HNANSEYLLDK(bi)NLYDLK_;_NMNIPK(bi)HNANSEYLLDK(bi)NLYDLK_;_NMNIPK(bi)HNANSEYLLDK(bi)NLYDLK_;_NMNIPK(bi)HNANSEYLLDK(bi)NLYDLK_;_NMNIPK(bi)HNANSEYLLDK(bi)NLYDLK_;_NM(ox)NIPK(bi)HNANSEYLLDK(bi)NLYDLK_;_NM(ox)NIPK(bi)HNANSEYLLDK(bi)NLYDLK_;_NM(ox)NIPK(bi)HNANSEYLLDK(bi)NLYDLK_;_NM(ox)NIPK(b…	NMNIPK(1)HNANSEYLLDK(0.999)NLYDLK(0.001);NMNIPK(1)HNANSEYLLDK(0.994)NLYDLK(0.006);NMNIPK(1)HNANSEYLLDK(0.99)NLYDLK(0.011);NMNIPK(1)HNANSEYLLDK(1)NLYDLK;NMNIPK(1)HNANSEYLLDK(1)NLYDLK;NMNIPK(1)HNANSEYLLDK(1)NLYDLK;NMNIPK(1)HNANSEYLLDK(0.998)NLYDLK(0.002);NMNIPK(1)HNANSEYLLDK(0.999)NLYDLK(0.001);NMNIPK(1)HNANSEYLLDK(0.999)NLYDLK(0.001);NMNIPK(1)HNANSEYLLDK(1)NLYDLK;NMNIPK(1)HNANSEYLLDK(0.999)NLYDLK(…	NMNIPK(78.29)HNANSEYLLDK(30.45)NLYDLK(-30.45);NMNIPK(80.77)HNANSEYLLDK(22.23)NLYDLK(-22.23);NMNIPK(35.62)HNANSEYLLDK(19.8)NLYDLK(-19.8);NMNIPK(88.03)HNANSEYLLDK(38.94)NLYDLK(-38.94);NMNIPK(114.13)HNANSEYLLDK(36.38)NLYDLK(-36.38);NMNIPK(74.34)HNANSEYLLDK(41.38)NLYDLK(-41.38);NMNIPK(62.73)HNANSEYLLDK(27.13)NLYDLK(-27.13);NMNIPK(90.47)HNANSEYLLDK(30.91)NLYDLK(-30.91);NMNIPK(115.98)HNANSEYLLDK(32.38)…			_NMNIPK(bi)HNANSEYLLDK(bi)NLYDLK_;_NM(ox)NIPK(bi)HNANSEYLLDK(bi)NLYDLK_;_NMNIPKHNANSEYLLDK(bi)NLYDLK_
PF3D7_0730900	P. falciparum	EMP1-trafficking protein										22.1648						2 Biotin (K)	0	2			4701800	0.0052087	107.85	67.687	2	3	3	3091.38	33.269	NNDDEDLKKESYTTKSYVSEFK	222	NaN	NaN	NaN		NaN	NaN	NaN		621	642	_NNDDEDLKKESYTTK(bi)SYVSEFK_;_NNDDEDLKKESYTTK(bi)SYVSEFK_;_NNDDEDLKKESYTTK(bi)SYVSEFK_;_NNDDEDLKKESYTTK(bi)SYVSEFK_;_NNDDEDLKKESYTTK(bi)SYVSEFK_;_NNDDEDLKKESYTTK(bi)SYVSEFK_;_NNDDEDLKKESYTTK(bi)SYVSEFK_;_NNDDEDLKKESYTTK(bi)SYVSEFK_;_NNDDEDLKKESYTTK(bi)SYVSEFK_;_NNDDEDLKKESYTTK(bi)SYVSEFK_;_NNDDEDLKKESYTTK(bi)SYVSEFK_;_NNDDEDLKK(bi)ESYTTK(bi)SYVSEFK_;_NNDDEDLKK(bi)ESYTTK(bi)SYVSEFK_	NNDDEDLKKESYTTK(1)SYVSEFK;NNDDEDLK(0.005)K(0.005)ESYTTK(0.976)SYVSEFK(0.014);NNDDEDLKKESYTTK(1)SYVSEFK;NNDDEDLKKESYTTK(1)SYVSEFK;NNDDEDLKKESYTTK(1)SYVSEFK;NNDDEDLKKESYTTK(0.993)SYVSEFK(0.006);NNDDEDLKKESYTTK(1)SYVSEFK;NNDDEDLK(0.004)K(0.003)ESYTTK(0.992)SYVSEFK(0.001);NNDDEDLKKESYTTK(0.999)SYVSEFK(0.001);NNDDEDLK(0.002)K(0.002)ESYTTK(0.995)SYVSEFK(0.002);NNDDEDLK(0.195)K(0.805)ESYTTK(0.996)SYVSEF…	NNDDEDLK(-116.27)K(-86.87)ESYTTK(73.98)SYVSEFK(-73.98);NNDDEDLK(-22.56)K(-22.56)ESYTTK(18.58)SYVSEFK(-18.58);NNDDEDLK(-95.6)K(-85.62)ESYTTK(48.02)SYVSEFK(-48.02);NNDDEDLK(-61.61)K(-51.43)ESYTTK(43.31)SYVSEFK(-43.31);NNDDEDLK(-103.95)K(-97.5)ESYTTK(43.33)SYVSEFK(-43.33);NNDDEDLK(-38.21)K(-33.99)ESYTTK(22.13)SYVSEFK(-22.13);NNDDEDLK(-113.66)K(-100.74)ESYTTK(49.26)SYVSEFK(-49.26);NNDDEDLK(-24.08)K(-…			_NNDDEDLKKESYTTK(bi)SYVSEFK_;_NNDDEDLKK(bi)ESYTTK(bi)SYVSEFK_
PF3D7_0730900	P. falciparum	EMP1-trafficking protein										24.5404	23.8191	23.5638	24.019	24.1642	24.217	2 Biotin (K)	0	2			106890000	8.08e-19	174.22	116.06	16	3	2	3019.32	35.634	NNDDEGINKESYTTKSYVSEFK	222	1	165.53	128.788	+	NaN	NaN	NaN		511	532	_NNDDEGINKESYTTK(bi)SYVSEFK_;_NNDDEGINKESYTTK(bi)SYVSEFK_;_NNDDEGINKESYTTK(bi)SYVSEFK_;_NNDDEGINKESYTTK(bi)SYVSEFK_;_NNDDEGINKESYTTK(bi)SYVSEFK_;_NNDDEGINKESYTTK(bi)SYVSEFK_;_NNDDEGINKESYTTK(bi)SYVSEFK_;_NNDDEGINKESYTTK(bi)SYVSEFK_;_NNDDEGINKESYTTK(bi)SYVSEFK_;_NNDDEGINKESYTTK(bi)SYVSEFK_;_NNDDEGINKESYTTK(bi)SYVSEFK_;_NNDDEGINKESYTTK(bi)SYVSEFK_;_NNDDEGINKESYTTK(bi)SYVSEFK_;_NNDDEGINKESYTTK(bi)SY…	NNDDEGINKESYTTK(1)SYVSEFK;NNDDEGINKESYTTK(0.664)SYVSEFK(0.336);NNDDEGINKESYTTK(0.998)SYVSEFK(0.002);NNDDEGINKESYTTK(1)SYVSEFK;NNDDEGINKESYTTK(1)SYVSEFK;NNDDEGINKESYTTK(0.987)SYVSEFK(0.013);NNDDEGINKESYTTK(1)SYVSEFK;NNDDEGINKESYTTK(1)SYVSEFK;NNDDEGINKESYTTK(0.997)SYVSEFK(0.003);NNDDEGINKESYTTK(1)SYVSEFK;NNDDEGINKESYTTK(1)SYVSEFK;NNDDEGINKESYTTK(0.935)SYVSEFK(0.065);NNDDEGINKESYTTK(1)SYVSEFK;NNDDEG…	NNDDEGINK(-105.6)ESYTTK(33.11)SYVSEFK(-33.11);NNDDEGINK(-111.97)ESYTTK(2.96)SYVSEFK(-2.96);NNDDEGINK(-102.97)ESYTTK(26.53)SYVSEFK(-26.53);NNDDEGINK(-92.65)ESYTTK(44.4)SYVSEFK(-44.4);NNDDEGINK(-71.64)ESYTTK(37.46)SYVSEFK(-37.46);NNDDEGINK(-47.24)ESYTTK(18.94)SYVSEFK(-18.94);NNDDEGINK(-110.55)ESYTTK(43.57)SYVSEFK(-43.57);NNDDEGINK(-146.29)ESYTTK(55.86)SYVSEFK(-55.86);NNDDEGINK(-105.64)ESYTTK(25.39)…			_NNDDEGINKESYTTK(bi)SYVSEFK_;_NNDDEGINK(bi)ESYTTK(bi)SYVSEFK_
PF3D7_0730900	P. falciparum	EMP1-trafficking protein										21.8441			21.3587	21.9869	21.6934	2 Biotin (K)	0	2			14002000	6.28e-07	102.6	53.113	8	3	3	3995.75	35.06	NNDDEGINKESYTTKSYVSEFKYNDDGGINK	222	NaN	NaN	NaN		NaN	NaN	NaN		511	541	_NNDDEGINKESYTTK(bi)SYVSEFKYNDDGGINK_;_NNDDEGINKESYTTK(bi)SYVSEFKYNDDGGINK_;_NNDDEGINKESYTTK(bi)SYVSEFKYNDDGGINK_;_NNDDEGINKESYTTK(bi)SYVSEFKYNDDGGINK_;_NNDDEGINKESYTTK(bi)SYVSEFKYNDDGGINK_;_NNDDEGINKESYTTK(bi)SYVSEFKYNDDGGINK_;_NNDDEGINKESYTTK(bi)SYVSEFKYNDDGGINK_;_NNDDEGINKESYTTK(bi)SYVSEFKYNDDGGINK_;_NNDDEGINKESYTTK(bi)SYVSEFK(bi)YNDDGGINK_;_NNDDEGINKESYTTK(bi)SYVSEFK(bi)YNDDGGINK_;_NNDDEGINKE…	NNDDEGINKESYTTK(1)SYVSEFKYNDDGGINK;NNDDEGINKESYTTK(1)SYVSEFKYNDDGGINK;NNDDEGINKESYTTK(1)SYVSEFKYNDDGGINK;NNDDEGINKESYTTK(1)SYVSEFKYNDDGGINK;NNDDEGINKESYTTK(1)SYVSEFKYNDDGGINK;NNDDEGINK(0.024)ESYTTK(0.976)SYVSEFKYNDDGGINK;NNDDEGINK(0.304)ESYTTK(0.696)SYVSEFKYNDDGGINK;NNDDEGINKESYTTK(1)SYVSEFKYNDDGGINK;NNDDEGINK(0.013)ESYTTK(0.988)SYVSEFK(1)YNDDGGINK;NNDDEGINK(0.066)ESYTTK(0.934)SYVSEFK(0.999)YNDDG…	NNDDEGINK(-50.38)ESYTTK(50.38)SYVSEFK(-71.57)YNDDGGINK(-99.2);NNDDEGINK(-51.57)ESYTTK(51.57)SYVSEFK(-81.68)YNDDGGINK(-108.99);NNDDEGINK(-38.33)ESYTTK(38.33)SYVSEFK(-87.5)YNDDGGINK(-116.42);NNDDEGINK(-47.11)ESYTTK(47.11)SYVSEFK(-66.64)YNDDGGINK(-96);NNDDEGINK(-43.3)ESYTTK(43.3)SYVSEFK(-82.3)YNDDGGINK(-99.62);NNDDEGINK(-16.07)ESYTTK(16.07)SYVSEFK(-68.76)YNDDGGINK(-76.54);NNDDEGINK(-3.6)ESYTTK(3.6)S…			_NNDDEGINKESYTTK(bi)SYVSEFKYNDDGGINK_;_NNDDEGINKESYTTK(bi)SYVSEFK(bi)YNDDGGINK_
PF3D7_0730900	P. falciparum	EMP1-trafficking protein										21.9258		20.9866	21.4099	21.4068	21.2536	2 Biotin (K)	0	2			14129000	1.44e-16	161.97	98.523	5	3	3	2934.39	33.841	NNDDGGLKKEISTPKNYVSEFK	222	NaN	NaN	NaN		NaN	NaN	NaN		643	664	_NNDDGGLKK(bi)EISTPK(bi)NYVSEFK_;_NNDDGGLKK(bi)EISTPK(bi)NYVSEFK_;_NNDDGGLKK(bi)EISTPK(bi)NYVSEFK_;_NNDDGGLK(bi)KEISTPK(bi)NYVSEFK_;_NNDDGGLKK(bi)EISTPK(bi)NYVSEFK_	NNDDGGLK(0.243)K(0.757)EISTPK(0.998)NYVSEFK(0.002);NNDDGGLK(0.06)K(0.94)EISTPK(0.855)NYVSEFK(0.145);NNDDGGLK(0.233)K(0.767)EISTPK(0.999)NYVSEFK(0.001);NNDDGGLK(0.5)K(0.5)EISTPK(0.998)NYVSEFK(0.002)	NNDDGGLK(-4.95)K(4.95)EISTPK(27.39)NYVSEFK(-27.39);NNDDGGLK(-12.03)K(12.03)EISTPK(7.76)NYVSEFK(-7.76);NNDDGGLK(-5.17)K(5.17)EISTPK(32.37)NYVSEFK(-32.37);NNDDGGLK(0)K(0)EISTPK(27.62)NYVSEFK(-27.62)			_NNDDGGLKK(bi)EISTPK(bi)NYVSEFK_;_NNDDGGLK(bi)KEISTPK(bi)NYVSEFK_
PF3D7_0730900	P. falciparum	EMP1-trafficking protein					23.0041	23.0376	23.7695	23.6649	23.1347	27.5536	27.5315	27.1115	27.4785	27.3828	27.391	2 Biotin (K)	0	2			1126300000	3.01e-20	226.06	162.52	62	NaN	2	2214.04	33.21	NNFDGCLKKEVSVPR	222	NaN	NaN	NaN		NaN	NaN	NaN		775	789	_NNFDGCLKK(bi)EVSVPR_;_NNFDGCLK(bi)KEVSVPR_;_NNFDGCLKK(bi)EVSVPR_;_NNFDGCLKK(bi)EVSVPR_;_NNFDGCLKK(bi)EVSVPR_;_NNFDGCLKK(bi)EVSVPR_;_NNFDGCLKK(bi)EVSVPR_;_NNFDGCLKK(bi)EVSVPR_;_NNFDGCLKK(bi)EVSVPR_;_NNFDGCLKK(bi)EVSVPR_;_NNFDGCLKK(bi)EVSVPR_;_NNFDGCLKK(bi)EVSVPR_;_NNFDGCLKK(bi)EVSVPR_;_NNFDGCLKK(bi)EVSVPR_;_NNFDGCLKK(bi)EVSVPR_;_NNFDGCLKK(bi)EVSVPR_;_NNFDGCLKK(bi)EVSVPR_;_NNFDGCLKK(bi)EVSVPR_;_NN…	NNFDGCLK(0.038)K(0.962)EVSVPR;NNFDGCLK(0.5)K(0.5)EVSVPR;NNFDGCLK(0.096)K(0.904)EVSVPR;NNFDGCLK(0.145)K(0.855)EVSVPR;NNFDGCLK(0.007)K(0.993)EVSVPR;NNFDGCLK(0.125)K(0.875)EVSVPR;NNFDGCLK(0.008)K(0.992)EVSVPR;NNFDGCLK(0.206)K(0.794)EVSVPR;NNFDGCLK(0.006)K(0.994)EVSVPR;NNFDGCLK(0.226)K(0.774)EVSVPR;NNFDGCLK(0.028)K(0.972)EVSVPR;NNFDGCLK(0.048)K(0.952)EVSVPR;NNFDGCLK(0.038)K(0.962)EVSVPR;NNFDGCLK(0.02…	NNFDGCLK(-13.99)K(13.99)EVSVPR;NNFDGCLK(0)K(0)EVSVPR;NNFDGCLK(-9.74)K(9.74)EVSVPR;NNFDGCLK(-7.72)K(7.72)EVSVPR;NNFDGCLK(-21.81)K(21.81)EVSVPR;NNFDGCLK(-8.46)K(8.46)EVSVPR;NNFDGCLK(-21.12)K(21.12)EVSVPR;NNFDGCLK(-5.86)K(5.86)EVSVPR;NNFDGCLK(-22.02)K(22.02)EVSVPR;NNFDGCLK(-5.35)K(5.35)EVSVPR;NNFDGCLK(-15.42)K(15.42)EVSVPR;NNFDGCLK(-13.01)K(13.01)EVSVPR;NNFDGCLK(-13.99)K(13.99)EVSVPR;NNFDGCLK(-16.75…			_NNFDGCLKK(bi)EVSVPR_;_NNFDGCLK(bi)KEVSVPR_;_NNFDGCLK(bi)K(bi)EVSVPR_
PF3D7_0730900	P. falciparum	EMP1-trafficking protein										23.2098	23.4425	22.939	23.122	23.1224	23.4923	2 Biotin (K)	0	2			59156000	6.33e-14	120.66	89.388	15	4	3	4463.02	37.339	NNSDGGINKDFGTKGSVINEIKDNNMNNENMQLGTTK	222	1	98.552	67.7486	+	NaN	NaN	NaN		1017	1053	_NNSDGGINKDFGTK(bi)GSVINEIKDNNM(ox)NNENM(ox)QLGTTK_;_NNSDGGINKDFGTK(bi)GSVINEIKDNNM(ox)NNENM(ox)QLGTTK_;_NNSDGGINKDFGTK(bi)GSVINEIKDNNM(ox)NNENM(ox)QLGTTK_;_NNSDGGINK(bi)DFGTKGSVINEIKDNNM(ox)NNENM(ox)QLGTTK_;_NNSDGGINKDFGTK(bi)GSVINEIKDNNM(ox)NNENM(ox)QLGTTK_;_NNSDGGINK(bi)DFGTKGSVINEIKDNNM(ox)NNENM(ox)QLGTTK_;_NNSDGGINKDFGTK(bi)GSVINEIKDNNM(ox)NNENM(ox)QLGTTK_;_NNSDGGINKDFGTK(bi)GSVINEIKDNNM(ox)…	NNSDGGINK(0.102)DFGTK(0.89)GSVINEIK(0.008)DNNMNNENMQLGTTK;NNSDGGINK(0.023)DFGTK(0.974)GSVINEIK(0.003)DNNMNNENMQLGTTK;NNSDGGINK(0.122)DFGTK(0.864)GSVINEIK(0.014)DNNMNNENMQLGTTK;NNSDGGINK(0.615)DFGTK(0.384)GSVINEIK(0.001)DNNMNNENMQLGTTK;NNSDGGINK(0.005)DFGTK(0.993)GSVINEIK(0.002)DNNMNNENMQLGTTK;NNSDGGINK(0.916)DFGTK(0.084)GSVINEIKDNNMNNENMQLGTTK;NNSDGGINK(0.02)DFGTK(0.976)GSVINEIK(0.004)DNNMNNENMQL…	NNSDGGINK(-9.43)DFGTK(9.43)GSVINEIK(-20.35)DNNMNNENMQLGTTK(-59.02);NNSDGGINK(-16.28)DFGTK(16.28)GSVINEIK(-24.87)DNNMNNENMQLGTTK(-65.1);NNSDGGINK(-8.5)DFGTK(8.5)GSVINEIK(-17.86)DNNMNNENMQLGTTK(-38.4);NNSDGGINK(2.05)DFGTK(-2.05)GSVINEIK(-29.02)DNNMNNENMQLGTTK(-55.64);NNSDGGINK(-22.88)DFGTK(22.88)GSVINEIK(-26.5)DNNMNNENMQLGTTK(-68.85);NNSDGGINK(10.4)DFGTK(-10.4)GSVINEIK(-43.46)DNNMNNENMQLGTTK(-72.52…			_NNSDGGINKDFGTK(bi)GSVINEIKDNNM(ox)NNENM(ox)QLGTTK_;_NNSDGGINK(bi)DFGTKGSVINEIKDNNM(ox)NNENM(ox)QLGTTK_;_NNSDGGINKDFGTK(bi)GSVINEIKDNNMNNENM(ox)QLGTTK_;_NNSDGGINKDFGTK(bi)GSVINEIKDNNM(ox)NNENMQLGTTK_;_NNSDGGINKDFGTK(bi)GSVINEIKDNNMNNENMQLGTTK_;_NNSDGGINK(bi)DFGTK(bi)GSVINEIKDNNM(ox)NNENMQLGTTK_;_NNSDGGINK(bi)DFGTK(bi)GSVINEIKDNNMNNENM(ox)QLGTTK_;_NNSDGGINK(bi)DFGTK(bi)GSVINEIKDNNMNNENMQLGTTK_
PF3D7_0730900	P. falciparum	EMP1-trafficking protein										26.067	25.9406	25.4298	25.7945	25.7746	25.7441	2 Biotin (K)	0	2			351760000	2.69e-10	159.69	112.2	14	3	2	2539.19	31.43	NNTQNETHKLKSDIGNFK	222	1	140.68	83.9087	+	NaN	NaN	NaN		1754	1771	_NNTQNETHK(bi)LK(bi)SDIGNFK_;_NNTQNETHK(bi)LK(bi)SDIGNFK_;_NNTQNETHK(bi)LK(bi)SDIGNFK_;_NNTQNETHK(bi)LK(bi)SDIGNFK_;_NNTQNETHK(bi)LK(bi)SDIGNFK_;_NNTQNETHK(bi)LK(bi)SDIGNFK_;_NNTQNETHKLK(bi)SDIGNFK_;_NNTQNETHKLK(bi)SDIGNFK_;_NNTQNETHKLK(bi)SDIGNFK_	NNTQNETHK(1)LK(1)SDIGNFK;NNTQNETHK(1)LK(1)SDIGNFK;NNTQNETHK(1)LK(1)SDIGNFK;NNTQNETHK(1)LK(1)SDIGNFK;NNTQNETHK(1)LK(1)SDIGNFK;NNTQNETHK(1)LK(1)SDIGNFK;NNTQNETHK(0.017)LK(0.983)SDIGNFK;NNTQNETHK(0.093)LK(0.907)SDIGNFK	NNTQNETHK(78.19)LK(46.09)SDIGNFK(-46.09);NNTQNETHK(97.17)LK(49.65)SDIGNFK(-49.65);NNTQNETHK(80.37)LK(39.95)SDIGNFK(-39.95);NNTQNETHK(84.97)LK(43.97)SDIGNFK(-43.97);NNTQNETHK(83.91)LK(47.49)SDIGNFK(-47.49);NNTQNETHK(73.32)LK(43.71)SDIGNFK(-43.71);NNTQNETHK(-17.65)LK(17.65)SDIGNFK(-34.07);NNTQNETHK(-9.89)LK(9.89)SDIGNFK(-40.5)			_NNTQNETHK(bi)LK(bi)SDIGNFK_;_NNTQNETHKLK(bi)SDIGNFK_
PF3D7_0730900	P. falciparum	EMP1-trafficking protein										21.5834	21.7173	21.1715	21.2622	20.9205	20.7931	2 Biotin (K)	0	2			15269000	0.00059954	107.46	61.64	7	3	3	2178.1	18.681	NPNKVNTKTVNKQNK	222	NaN	NaN	NaN		NaN	NaN	NaN		284	298	_NPNKVNTK(bi)TVNKQNK_;_NPNKVNTK(bi)TVNKQNK_;_NPNKVNTK(bi)TVNKQNK_;_NPNKVNTK(bi)TVNKQNK_;_NPNKVNTK(bi)TVNKQNK_;_NPNKVNTK(bi)TVNKQNK_;_NPNKVNTK(bi)TVNKQNK_;_NPNKVNTK(bi)TVNKQNK_;_NPNKVNTK(bi)TVNKQNK_;_NPNKVNTK(bi)TVNKQNK_;_NPNKVNTK(bi)TVNKQNK_;_NPNKVNTK(bi)TVNKQNK_;_NPNKVNTK(bi)TVNK(bi)QNK_;_NPNKVNTK(bi)TVNK(bi)QNK_;_NPNKVNTK(bi)TVNK(bi)QNK_;_NPNKVNTK(bi)TVNK(bi)QNK_;_NPNKVNTK(bi)TVNK(bi)QNK_;_NPNK…	NPNK(0.001)VNTK(0.998)TVNKQNK;NPNKVNTK(0.999)TVNK(0.001)QNK;NPNKVNTK(0.999)TVNKQNK;NPNKVNTK(0.986)TVNK(0.013)QNK(0.001);NPNK(0.001)VNTK(0.999)TVNKQNK;NPNKVNTK(1)TVNKQNK;NPNKVNTK(1)TVNKQNK;NPNKVNTK(0.998)TVNK(0.001)QNK;NPNK(0.005)VNTK(0.995)TVNK(0.998)QNK(0.002);NPNK(0.023)VNTK(0.977)TVNK(0.991)QNK(0.009);NPNKVNTK(1)TVNK(0.999)QNK(0.001);NPNK(0.003)VNTK(0.997)TVNK(0.993)QNK(0.007);NPNK(0.001)VNTK(…	NPNK(-29.53)VNTK(29.53)TVNK(-34.05)QNK(-34.84);NPNK(-36.56)VNTK(32.8)TVNK(-32.8)QNK(-38.64);NPNK(-47.18)VNTK(33.25)TVNK(-36.23)QNK(-33.25);NPNK(-41.81)VNTK(18.64)TVNK(-18.64)QNK(-30.94);NPNK(-29.53)VNTK(29.53)TVNK(-38.94)QNK(-44.95);NPNK(-63.32)VNTK(39.94)TVNK(-39.94)QNK(-46.02);NPNK(-39.63)VNTK(37.35)TVNK(-37.35)QNK(-51.22);NPNK(-46.5)VNTK(28.42)TVNK(-28.42)QNK(-34.29);NPNK(-22.97)VNTK(22.97)TVN…			_NPNKVNTK(bi)TVNKQNK_;_NPNKVNTK(bi)TVNK(bi)QNK_
PF3D7_0730900	P. falciparum	EMP1-trafficking protein										21.3538		21.8768		20.9922		2 Biotin (K)	0	2			8616900	0.00031881	131.66	77.57	7	3	2	1992.94	21.099	NSLHKEEKNVTDK	222	1	126.41	78.6174	+	NaN	NaN	NaN		1772	1784	_NSLHKEEK(bi)NVTDK_;_NSLHKEEK(bi)NVTDK_;_NSLHKEEK(bi)NVTDK_;_NSLHKEEK(bi)NVTDK_;_NSLHKEEK(bi)NVTDK_;_NSLHK(bi)EEKNVTDK_;_NSLHKEEK(bi)NVTDK_;_NSLHKEEK(bi)NVTDK_;_NSLHKEEK(bi)NVTDK_;_NSLHK(bi)EEKNVTDK_;_NSLHKEEK(bi)NVTDK_;_NSLHKEEK(bi)NVTDK_;_NSLHK(bi)EEKNVTDK_;_NSLHKEEK(bi)NVTDK_;_NSLHKEEK(bi)NVTDK_;_NSLHKEEK(bi)NVTDK_;_NSLHKEEK(bi)NVTDK_;_NSLHKEEK(bi)NVTDK_;_NSLHKEEK(bi)NVTDK_;_NSLHKEEK(bi)NVTDK_…	NSLHK(0.06)EEK(0.94)NVTDK;NSLHK(0.001)EEK(0.999)NVTDK;NSLHK(0.001)EEK(0.998)NVTDK(0.001);NSLHK(0.001)EEK(0.998)NVTDK(0.001);NSLHK(0.001)EEK(0.996)NVTDK(0.003);NSLHK(0.625)EEK(0.375)NVTDK;NSLHKEEK(1)NVTDK;NSLHKEEK(1)NVTDK;NSLHKEEK(1)NVTDK;NSLHK(0.997)EEK(0.002)NVTDK;NSLHKEEK(1)NVTDK;NSLHKEEK(1)NVTDK;NSLHK(1)EEKNVTDK;NSLHKEEK(1)NVTDK;NSLHKEEK(1)NVTDK;NSLHKEEK(1)NVTDK;NSLHKEEK(1)NVTDK;NSLHKEEK(1)NVT…	NSLHK(-11.96)EEK(11.96)NVTDK(-35.22);NSLHK(-32.8)EEK(32.8)NVTDK(-40.75);NSLHK(-29.62)EEK(29.62)NVTDK(-32.17);NSLHK(-30.23)EEK(30.23)NVTDK(-30.55);NSLHK(-31.56)EEK(25.11)NVTDK(-25.11);NSLHK(2.21)EEK(-2.21)NVTDK(-33.94);NSLHK(-71.25)EEK(51.07)NVTDK(-51.07);NSLHK(-35.47)EEK(35.47)NVTDK(-82.96);NSLHK(-38.57)EEK(38.57)NVTDK(-51.38);NSLHK(26.08)EEK(-26.08)NVTDK(-41.41);NSLHK(-80.48)EEK(45.2)NVTDK(-45.2…			_NSLHKEEK(bi)NVTDK_;_NSLHK(bi)EEKNVTDK_;_NSLHK(bi)EEK(bi)NVTDK_
PF3D7_0202000	P. falciparum	knob-associated histidine-rich protein				22.099	22.2633	21.7525	22.6617	22.5581	22.2657							2 Biotin (K)	0	2			30912000	3.94e-32	174.61	120.3	30	3	3	3128.45	19.289	NTAGENKKVDSTSADNKSTNAATPGAK	117	1	111.49	77.8748	+	NaN	NaN	NaN		484	510	_NTAGENK(bi)KVDSTSADNKSTNAATPGAK_;_NTAGENKK(bi)VDSTSADNKSTNAATPGAK_;_NTAGENKKVDSTSADNK(bi)STNAATPGAK_;_NTAGENK(bi)KVDSTSADNKSTNAATPGAK_;_NTAGENKK(bi)VDSTSADNKSTNAATPGAK_;_NTAGENKKVDSTSADNK(bi)STNAATPGAK_;_NTAGENKKVDSTSADNK(bi)STNAATPGAK_;_NTAGENK(bi)KVDSTSADNKSTNAATPGAK_;_NTAGENKKVDSTSADNK(bi)STNAATPGAK_;_NTAGENK(bi)KVDSTSADNKSTNAATPGAK_;_NTAGENKKVDSTSADNK(bi)STNAATPGAK_;_NTAGENK(bi)KVDSTSADNKSTN…	NTAGENK(0.497)K(0.497)VDSTSADNK(0.006)STNAATPGAK;NTAGENK(0.206)K(0.792)VDSTSADNK(0.003)STNAATPGAK;NTAGENK(0.013)K(0.059)VDSTSADNK(0.928)STNAATPGAK;NTAGENK(0.499)K(0.499)VDSTSADNK(0.002)STNAATPGAK;NTAGENK(0.2)K(0.531)VDSTSADNK(0.269)STNAATPGAK;NTAGENK(0.005)K(0.019)VDSTSADNK(0.976)STNAATPGAK;NTAGENKKVDSTSADNK(1)STNAATPGAK;NTAGENK(0.491)K(0.491)VDSTSADNK(0.019)STNAATPGAK;NTAGENKKVDSTSADNK(1)STNAATP…	NTAGENK(0)K(0)VDSTSADNK(-19)STNAATPGAK(-52.72);NTAGENK(-5.85)K(5.85)VDSTSADNK(-24.79)STNAATPGAK(-47);NTAGENK(-18.66)K(-11.95)VDSTSADNK(11.95)STNAATPGAK(-53.24);NTAGENK(0)K(0)VDSTSADNK(-25.21)STNAATPGAK(-50.21);NTAGENK(-4.24)K(2.95)VDSTSADNK(-2.95)STNAATPGAK(-42.61);NTAGENK(-22.97)K(-17.21)VDSTSADNK(17.21)STNAATPGAK(-45.6);NTAGENK(-56.33)K(-50.06)VDSTSADNK(45.73)STNAATPGAK(-45.73);NTAGENK(0)K(0)VD…			_NTAGENK(bi)KVDSTSADNKSTNAATPGAK_;_NTAGENKK(bi)VDSTSADNKSTNAATPGAK_;_NTAGENKKVDSTSADNK(bi)STNAATPGAK_;_NTAGENK(bi)KVDSTSADNK(bi)STNAATPGAK_;_NTAGENK(bi)K(bi)VDSTSADNKSTNAATPGAK_
PF3D7_0730900	P. falciparum	EMP1-trafficking protein				22.6255	23.0318	21.5526	22.858	22.5825	22.4671	25.341	25.2463	25.0275	25.1214	25.0105	25.2021	2 Biotin (K)	0	2			263130000	5.21e-15	153.06	102.87	30	NaN	2	2821.32	36.325	NVLEKYNDYASKSHGMSSVLK	222	NaN	NaN	NaN		NaN	NaN	NaN		157	177	_NVLEKYNDYASK(bi)SHGMSSVLK_;_NVLEKYNDYASK(bi)SHGMSSVLK_;_NVLEKYNDYASK(bi)SHGMSSVLK_;_NVLEKYNDYASK(bi)SHGMSSVLK_;_NVLEKYNDYASK(bi)SHGMSSVLK_;_NVLEKYNDYASK(bi)SHGMSSVLK_;_NVLEKYNDYASK(bi)SHGMSSVLK_;_NVLEKYNDYASK(bi)SHGMSSVLK_;_NVLEKYNDYASK(bi)SHGMSSVLK_;_NVLEKYNDYASK(bi)SHGMSSVLK_;_NVLEKYNDYASK(bi)SHGMSSVLK_;_NVLEKYNDYASK(bi)SHGMSSVLK_;_NVLEKYNDYASK(bi)SHGMSSVLK_;_NVLEKYNDYASK(bi)SHGMSSVLK_;_NVLEKY…	NVLEKYNDYASK(0.997)SHGMSSVLK(0.003);NVLEKYNDYASK(0.97)SHGMSSVLK(0.03);NVLEKYNDYASK(0.973)SHGMSSVLK(0.027);NVLEKYNDYASK(0.908)SHGMSSVLK(0.092);NVLEKYNDYASK(1)SHGMSSVLK;NVLEKYNDYASK(1)SHGMSSVLK;NVLEKYNDYASK(1)SHGMSSVLK;NVLEKYNDYASK(0.992)SHGMSSVLK(0.008);NVLEKYNDYASK(1)SHGMSSVLK;NVLEKYNDYASK(0.994)SHGMSSVLK(0.006);NVLEKYNDYASK(0.996)SHGMSSVLK(0.004);NVLEKYNDYASK(0.995)SHGMSSVLK(0.005);NVLEKYNDYASK(…	NVLEK(-68.05)YNDYASK(25.5)SHGMSSVLK(-25.5);NVLEK(-67.7)YNDYASK(15.07)SHGMSSVLK(-15.07);NVLEK(-68.54)YNDYASK(15.52)SHGMSSVLK(-15.52);NVLEK(-75.14)YNDYASK(9.95)SHGMSSVLK(-9.95);NVLEK(-99.86)YNDYASK(53.42)SHGMSSVLK(-53.42);NVLEK(-66.29)YNDYASK(37.17)SHGMSSVLK(-37.17);NVLEK(-65.48)YNDYASK(42.46)SHGMSSVLK(-42.46);NVLEK(-51.86)YNDYASK(20.9)SHGMSSVLK(-20.9);NVLEK(-68.46)YNDYASK(34.82)SHGMSSVLK(-34.82);N…			_NVLEKYNDYASK(bi)SHGMSSVLK_;_NVLEK(bi)YNDYASK(bi)SHGMSSVLK_;_NVLEKYNDYASK(bi)SHGM(ox)SSVLK_;_NVLEK(bi)YNDYASK(bi)SHGM(ox)SSVLK_
PF3D7_0730900	P. falciparum	EMP1-trafficking protein										22.5056	22.626	22.5548	22.3768	22.4752	22.6172	2 Biotin (K)	0	2			36299000	0.00021721	127.07	87.317	11	3	2	2198.01	24.652	NYKHLTDEENKVEK	222	NaN	NaN	NaN		NaN	NaN	NaN		1162	1175	_NYK(bi)HLTDEENKVEK_;_NYK(bi)HLTDEENKVEK_;_NYK(bi)HLTDEENKVEK_;_NYK(bi)HLTDEENKVEK_;_NYK(bi)HLTDEENKVEK_;_NYK(bi)HLTDEENKVEK_;_NYK(bi)HLTDEENKVEK_;_NYK(bi)HLTDEENKVEK_;_NYK(bi)HLTDEENKVEK_;_NYK(bi)HLTDEENKVEK_;_NYK(bi)HLTDEENKVEK_;_NYK(bi)HLTDEENKVEK_;_NYK(bi)HLTDEENKVEK_;_NYK(bi)HLTDEENKVEK_;_NYK(bi)HLTDEENKVEK_;_NYK(bi)HLTDEENKVEK_;_NYK(bi)HLTDEENKVEK_;_NYK(bi)HLTDEENKVEK_;_NYK(bi)HLTDEENKVEK_;…	NYK(1)HLTDEENKVEK;NYK(1)HLTDEENKVEK;NYK(1)HLTDEENKVEK;NYK(1)HLTDEENKVEK;NYK(1)HLTDEENKVEK;NYK(1)HLTDEENKVEK;NYK(1)HLTDEENKVEK;NYK(1)HLTDEENKVEK;NYK(1)HLTDEENKVEK;NYK(1)HLTDEENKVEK;NYK(1)HLTDEENKVEK;NYK(1)HLTDEENKVEK;NYK(1)HLTDEENKVEK;NYK(1)HLTDEENKVEK;NYK(1)HLTDEENKVEK;NYK(1)HLTDEENKVEK;NYK(1)HLTDEENKVEK;NYK(1)HLTDEENKVEK;NYK(1)HLTDEENKVEK;NYK(1)HLTDEENKVEK;NYK(1)HLTDEENKVEK;NYK(1)HLTDEENKVEK;NYK…	NYK(95.53)HLTDEENK(-95.53)VEK(-105.73);NYK(119.31)HLTDEENK(-119.31)VEK(-120.75);NYK(106.07)HLTDEENK(-106.07)VEK(-129.47);NYK(85.7)HLTDEENK(-85.7)VEK(-102.1);NYK(105.39)HLTDEENK(-105.39)VEK(-105.39);NYK(71.08)HLTDEENK(-71.08)VEK(-100.66);NYK(95.6)HLTDEENK(-95.6)VEK(-101.02);NYK(56.01)HLTDEENK(-56.01)VEK(-72.41);NYK(49.44)HLTDEENK(-49.44)VEK(-75.42);NYK(58.27)HLTDEENK(-58.27)VEK(-66.16);NYK(112.99)…			_NYK(bi)HLTDEENKVEK_;_NYK(bi)HLTDEENK(bi)VEK_
PF3D7_0730900	P. falciparum	EMP1-trafficking protein										25.2678	25.8264	25.0567	24.7234	25.6838	25.3511	2 Biotin (K)	0	2			259260000	1.11e-35	196.98	152.1	27	NaN	3	3226.46	29.174	NYKHLTDEENKVEKEMSIHDGMK	222	1	116.27	83.319	+	NaN	NaN	NaN		1162	1184	_NYK(bi)HLTDEENKVEKEMSIHDGM(ox)K_;_NYK(bi)HLTDEENKVEKEMSIHDGM(ox)K_;_NYK(bi)HLTDEENKVEKEMSIHDGM(ox)K_;_NYK(bi)HLTDEENKVEKEMSIHDGM(ox)K_;_NYK(bi)HLTDEENKVEKEMSIHDGM(ox)K_;_NYK(bi)HLTDEENKVEKEM(ox)SIHDGMK_;_NYK(bi)HLTDEENKVEKEM(ox)SIHDGMK_;_NYK(bi)HLTDEENKVEKEMSIHDGM(ox)K_;_NYK(bi)HLTDEENKVEKEMSIHDGM(ox)K_;_NYK(bi)HLTDEENKVEKEMSIHDGM(ox)K_;_NYK(bi)HLTDEENKVEKEM(ox)SIHDGMK_;_NYK(bi)HLTDEENKVEKEMSIHD…	NYK(1)HLTDEENKVEKEMSIHDGMK;NYK(0.999)HLTDEENK(0.001)VEK(0.001)EMSIHDGMK;NYK(1)HLTDEENKVEKEMSIHDGMK;NYK(1)HLTDEENKVEKEMSIHDGMK;NYK(0.999)HLTDEENK(0.001)VEKEMSIHDGMK;NYK(1)HLTDEENKVEKEMSIHDGMK;NYK(1)HLTDEENKVEKEMSIHDGMK;NYK(1)HLTDEENKVEKEMSIHDGMK;NYK(1)HLTDEENKVEKEMSIHDGMK;NYK(1)HLTDEENKVEKEMSIHDGMK;NYK(1)HLTDEENKVEKEMSIHDGMK;NYK(0.999)HLTDEENK(0.001)VEKEMSIHDGMK;NYK(1)HLTDEENKVEKEMSIHDGMK;NYK(0.99…	NYK(53.87)HLTDEENK(-53.87)VEK(-78.28)EMSIHDGMK(-97.48);NYK(32.27)HLTDEENK(-32.27)VEK(-32.27)EMSIHDGMK(-49.45);NYK(49.46)HLTDEENK(-49.46)VEK(-54.76)EMSIHDGMK(-74.56);NYK(37.64)HLTDEENK(-37.64)VEK(-44.51)EMSIHDGMK(-67.72);NYK(29.34)HLTDEENK(-29.34)VEK(-46.9)EMSIHDGMK(-68.82);NYK(59.76)HLTDEENK(-59.76)VEK(-63.03)EMSIHDGMK(-79.93);NYK(51.21)HLTDEENK(-51.21)VEK(-55.49)EMSIHDGMK(-60.05);NYK(92.29)HLTDE…			_NYK(bi)HLTDEENKVEKEMSIHDGM(ox)K_;_NYK(bi)HLTDEENKVEKEM(ox)SIHDGMK_;_NYK(bi)HLTDEENKVEKEMSIHDGMK_;_NYKHLTDEENKVEK(bi)EMSIHDGMK_;_NYKHLTDEENK(bi)VEKEMSIHDGMK_;_NYK(bi)HLTDEENKVEKEM(ox)SIHDGM(ox)K_;_NYK(bi)HLTDEENKVEK(bi)EM(ox)SIHDGM(ox)K_;_NYK(bi)HLTDEENKVEK(bi)EMSIHDGMK_;_NYK(bi)HLTDEENK(bi)VEKEMSIHDGMK_;_NYK(bi)HLTDEENK(bi)VEKEMSIHDGM(ox)K_
PF3D7_1476200	P. falciparum	Plasmodium exported protein (PHISTb), unknown function					20.3281											2 Biotin (K)	0	2			1316300	0.010071	101.39	39.226	1	2	2	1869.95	30.497	NYKNVPTKIDVK	466	1	101.39	88.062	+	NaN	NaN	NaN		187	198	_NYK(bi)NVPTKIDVK_;_NYK(bi)NVPTKIDVK_;_NYK(bi)NVPTKIDVK_;_NYK(bi)NVPTKIDVK_;_NYK(bi)NVPTKIDVK_;_NYK(bi)NVPTKIDVK_;_NYK(bi)NVPTKIDVK_;_NYK(bi)NVPTKIDVK_;_NYK(bi)NVPTK(bi)IDVK_	NYK(1)NVPTKIDVK;NYK(1)NVPTKIDVK;NYK(1)NVPTKIDVK;NYK(1)NVPTKIDVK;NYK(1)NVPTKIDVK;NYK(1)NVPTKIDVK;NYK(1)NVPTKIDVK;NYK(1)NVPTK(0.853)IDVK(0.147)	NYK(42.04)NVPTK(-42.04)IDVK(-74.12);NYK(70.75)NVPTK(-70.75)IDVK(-94.96);NYK(45.87)NVPTK(-45.87)IDVK(-85.32);NYK(75.89)NVPTK(-75.89)IDVK(-112.51);NYK(62.04)NVPTK(-62.04)IDVK(-94.64);NYK(47.58)NVPTK(-47.58)IDVK(-87.81);NYK(45.84)NVPTK(-45.84)IDVK(-61.01);NYK(88.06)NVPTK(7.62)IDVK(-7.62)			_NYK(bi)NVPTKIDVK_;_NYK(bi)NVPTK(bi)IDVK_
PF3D7_0532300	P. falciparum	Plasmodium exported protein (PHISTb), unknown function				25.0317	25.2643	24.7338	26.8385	26.632	25.9933							2 Biotin (K)	0	2			393040000	9.54e-26	157.01	126.48	10	NaN	2	4272.01	42.665	NYSTHENTYPTLKTLLEKYAITDDYSPPDVFGK	184	1	106.37	77.6526	+	NaN	NaN	NaN		339	371	_NYSTHENTYPTLK(bi)TLLEK(bi)YAITDDYSPPDVFGK_;_NYSTHENTYPTLK(bi)TLLEK(bi)YAITDDYSPPDVFGK_;_NYSTHENTYPTLK(bi)TLLEK(bi)YAITDDYSPPDVFGK_;_NYSTHENTYPTLK(bi)TLLEK(bi)YAITDDYSPPDVFGK_;_NYSTHENTYPTLK(bi)TLLEK(bi)YAITDDYSPPDVFGK_;_NYSTHENTYPTLK(bi)TLLEK(bi)YAITDDYSPPDVFGK_;_NYSTHENTYPTLK(bi)TLLEK(bi)YAITDDYSPPDVFGK_;_NYSTHENTYPTLK(bi)TLLEK(bi)YAITDDYSPPDVFGK_;_NYSTHENTYPTLK(bi)TLLEK(bi)YAITDDYSPPDVFGK_;_NY…	NYSTHENTYPTLK(1)TLLEK(1)YAITDDYSPPDVFGK;NYSTHENTYPTLK(1)TLLEK(1)YAITDDYSPPDVFGK;NYSTHENTYPTLK(1)TLLEK(1)YAITDDYSPPDVFGK;NYSTHENTYPTLK(1)TLLEK(1)YAITDDYSPPDVFGK;NYSTHENTYPTLK(1)TLLEK(1)YAITDDYSPPDVFGK;NYSTHENTYPTLK(1)TLLEK(1)YAITDDYSPPDVFGK	NYSTHENTYPTLK(75.08)TLLEK(61.65)YAITDDYSPPDVFGK(-61.65);NYSTHENTYPTLK(106.48)TLLEK(83.14)YAITDDYSPPDVFGK(-83.14);NYSTHENTYPTLK(90.15)TLLEK(84.13)YAITDDYSPPDVFGK(-84.13);NYSTHENTYPTLK(79.72)TLLEK(65.83)YAITDDYSPPDVFGK(-65.83);NYSTHENTYPTLK(80.48)TLLEK(65.56)YAITDDYSPPDVFGK(-65.56);NYSTHENTYPTLK(77.65)TLLEK(69.26)YAITDDYSPPDVFGK(-69.26)			_NYSTHENTYPTLK(bi)TLLEK(bi)YAITDDYSPPDVFGK_
PF3D7_0730900	P. falciparum	EMP1-trafficking protein							21.2827		20.5799	23.8093	23.5165	23.5522	23.5522	23.7895	23.7492	2 Biotin (K)	0	2			84036000	2.97e-14	188.44	127.95	21	NaN	2	2414.09	41.153	NYVSEFKNNFDGCLKK	222	NaN	NaN	NaN		NaN	NaN	NaN		768	783	_NYVSEFK(bi)NNFDGCLKK_;_NYVSEFK(bi)NNFDGCLKK_;_NYVSEFK(bi)NNFDGCLKK_;_NYVSEFK(bi)NNFDGCLKK_;_NYVSEFK(bi)NNFDGCLKK_;_NYVSEFK(bi)NNFDGCLKK_;_NYVSEFK(bi)NNFDGCLKK_;_NYVSEFK(bi)NNFDGCLKK_;_NYVSEFK(bi)NNFDGCLKK_;_NYVSEFK(bi)NNFDGCLKK_;_NYVSEFK(bi)NNFDGCLKK_;_NYVSEFK(bi)NNFDGCLKK_;_NYVSEFK(bi)NNFDGCLKK_;_NYVSEFK(bi)NNFDGCLKK_;_NYVSEFK(bi)NNFDGCLKK_;_NYVSEFK(bi)NNFDGCLKK_;_NYVSEFK(bi)NNFDGCLKK_;_NYVSEFK…	NYVSEFK(1)NNFDGCLKK;NYVSEFK(1)NNFDGCLKK;NYVSEFK(1)NNFDGCLKK;NYVSEFK(1)NNFDGCLKK;NYVSEFK(1)NNFDGCLKK;NYVSEFK(1)NNFDGCLKK;NYVSEFK(1)NNFDGCLKK;NYVSEFK(0.974)NNFDGCLK(0.013)K(0.013);NYVSEFK(1)NNFDGCLKK;NYVSEFK(1)NNFDGCLKK;NYVSEFK(0.993)NNFDGCLK(0.004)K(0.004);NYVSEFK(0.762)NNFDGCLK(0.119)K(0.119);NYVSEFK(1)NNFDGCLKK;NYVSEFK(1)NNFDGCLKK;NYVSEFK(1)NNFDGCLKK;NYVSEFK(1)NNFDGCLKK;NYVSEFK(1)NNFDGCLKK;NYVSE…	NYVSEFK(70.94)NNFDGCLK(-70.94)K(-70.94);NYVSEFK(44.87)NNFDGCLK(-44.87)K(-44.87);NYVSEFK(50.29)NNFDGCLK(-50.29)K(-50.29);NYVSEFK(38.16)NNFDGCLK(-38.16)K(-38.16);NYVSEFK(72.5)NNFDGCLK(-72.5)K(-72.5);NYVSEFK(102.12)NNFDGCLK(-102.12)K(-102.12);NYVSEFK(67.21)NNFDGCLK(-67.21)K(-67.21);NYVSEFK(18.71)NNFDGCLK(-18.71)K(-18.71);NYVSEFK(68.88)NNFDGCLK(-68.88)K(-68.88);NYVSEFK(69.87)NNFDGCLK(-69.87)K(-69.87)…			_NYVSEFK(bi)NNFDGCLKK_;_NYVSEFK(bi)NNFDGCLK(bi)K_;_NYVSEFK(bi)NNFDGCLKK(bi)_
PF3D7_0730900	P. falciparum	EMP1-trafficking protein				20.9938	23.4676	21.4929	24.7024	24.317	23.7077	26.1814	26.6865	26.3975	26.3828	26.0995	26.3778	2 Biotin (K)	0	2			597470000	1.17e-16	162.44	123.93	53	NaN	3	3081.45	39.461	NYVSEFKNNFDGCLKKEVSVPR	222	1	136.77	136.766	+	NaN	NaN	NaN		768	789	_NYVSEFKNNFDGCLKK(bi)EVSVPR_;_NYVSEFKNNFDGCLKK(bi)EVSVPR_;_NYVSEFKNNFDGCLKK(bi)EVSVPR_;_NYVSEFKNNFDGCLKK(bi)EVSVPR_;_NYVSEFKNNFDGCLKK(bi)EVSVPR_;_NYVSEFKNNFDGCLKK(bi)EVSVPR_;_NYVSEFKNNFDGCLKK(bi)EVSVPR_;_NYVSEFKNNFDGCLKK(bi)EVSVPR_;_NYVSEFKNNFDGCLKK(bi)EVSVPR_;_NYVSEFKNNFDGCLKK(bi)EVSVPR_;_NYVSEFKNNFDGCLKK(bi)EVSVPR_;_NYVSEFKNNFDGCLKK(bi)EVSVPR_;_NYVSEFKNNFDGCLKK(bi)EVSVPR_;_NYVSEFKNNFDGCLKK(bi)E…	NYVSEFKNNFDGCLK(0.172)K(0.828)EVSVPR;NYVSEFKNNFDGCLK(0.001)K(0.999)EVSVPR;NYVSEFKNNFDGCLK(0.209)K(0.791)EVSVPR;NYVSEFKNNFDGCLK(0.218)K(0.782)EVSVPR;NYVSEFKNNFDGCLK(0.037)K(0.963)EVSVPR;NYVSEFKNNFDGCLK(0.332)K(0.668)EVSVPR;NYVSEFKNNFDGCLK(0.032)K(0.968)EVSVPR;NYVSEFKNNFDGCLK(0.022)K(0.978)EVSVPR;NYVSEFKNNFDGCLK(0.209)K(0.791)EVSVPR;NYVSEFKNNFDGCLK(0.118)K(0.882)EVSVPR;NYVSEFKNNFDGCLK(0.044)K(0.956…	NYVSEFK(-92.13)NNFDGCLK(-6.83)K(6.83)EVSVPR;NYVSEFK(-144.33)NNFDGCLK(-29.13)K(29.13)EVSVPR;NYVSEFK(-62.5)NNFDGCLK(-5.79)K(5.79)EVSVPR;NYVSEFK(-68.16)NNFDGCLK(-5.56)K(5.56)EVSVPR;NYVSEFK(-76.24)NNFDGCLK(-14.21)K(14.21)EVSVPR;NYVSEFK(-126.03)NNFDGCLK(-3.04)K(3.04)EVSVPR;NYVSEFK(-132.92)NNFDGCLK(-14.84)K(14.84)EVSVPR;NYVSEFK(-64.05)NNFDGCLK(-16.41)K(16.41)EVSVPR;NYVSEFK(-65.38)NNFDGCLK(-5.79)K(5.79)…			_NYVSEFKNNFDGCLKK(bi)EVSVPR_;_NYVSEFKNNFDGCLK(bi)K(bi)EVSVPR_;_NYVSEFK(bi)NNFDGCLKK(bi)EVSVPR_;_NYVSEFK(bi)NNFDGCLK(bi)KEVSVPR_;_NYVSEFK(bi)NNFDGCLK(bi)K(bi)EVSVPR_
PF3D7_0730900	P. falciparum	EMP1-trafficking protein					21.6409		22.001	22.1721	21.6084	27.1015	27.4862	26.8741	27.0084	26.8504	27.2979	2 Biotin (K)	0	2			892400000	1.86e-11	141.7	99.06	42	NaN	2	2964.39	41.844	NYVSEFKNNFDGGINKEVSVPR	222	1	130.37	130.372	+	NaN	NaN	NaN		658	679	_NYVSEFKNNFDGGINK(bi)EVSVPR_;_NYVSEFK(bi)NNFDGGINKEVSVPR_;_NYVSEFKNNFDGGINK(bi)EVSVPR_;_NYVSEFKNNFDGGINK(bi)EVSVPR_;_NYVSEFK(bi)NNFDGGINKEVSVPR_;_NYVSEFK(bi)NNFDGGINKEVSVPR_;_NYVSEFKNNFDGGINK(bi)EVSVPR_;_NYVSEFKNNFDGGINK(bi)EVSVPR_;_NYVSEFK(bi)NNFDGGINKEVSVPR_;_NYVSEFKNNFDGGINK(bi)EVSVPR_;_NYVSEFKNNFDGGINK(bi)EVSVPR_;_NYVSEFK(bi)NNFDGGINKEVSVPR_;_NYVSEFKNNFDGGINK(bi)EVSVPR_;_NYVSEFKNNFDGGINK(bi)E…	NYVSEFK(0.001)NNFDGGINK(0.999)EVSVPR;NYVSEFK(1)NNFDGGINKEVSVPR;NYVSEFKNNFDGGINK(1)EVSVPR;NYVSEFKNNFDGGINK(1)EVSVPR;NYVSEFK(1)NNFDGGINKEVSVPR;NYVSEFK(1)NNFDGGINKEVSVPR;NYVSEFKNNFDGGINK(1)EVSVPR;NYVSEFKNNFDGGINK(1)EVSVPR;NYVSEFK(1)NNFDGGINKEVSVPR;NYVSEFKNNFDGGINK(1)EVSVPR;NYVSEFKNNFDGGINK(1)EVSVPR;NYVSEFK(1)NNFDGGINKEVSVPR;NYVSEFKNNFDGGINK(1)EVSVPR;NYVSEFKNNFDGGINK(1)EVSVPR;NYVSEFK(1)NNFDGGINKEVSVP…	NYVSEFK(-28.35)NNFDGGINK(28.35)EVSVPR;NYVSEFK(107.61)NNFDGGINK(-107.61)EVSVPR;NYVSEFK(-84.21)NNFDGGINK(84.21)EVSVPR;NYVSEFK(-50.14)NNFDGGINK(50.14)EVSVPR;NYVSEFK(101.53)NNFDGGINK(-101.53)EVSVPR;NYVSEFK(74.47)NNFDGGINK(-74.47)EVSVPR;NYVSEFK(-61.41)NNFDGGINK(61.41)EVSVPR;NYVSEFK(-34.11)NNFDGGINK(34.11)EVSVPR;NYVSEFK(91.72)NNFDGGINK(-91.72)EVSVPR;NYVSEFK(-131.39)NNFDGGINK(131.39)EVSVPR;NYVSEFK(-69.1…			_NYVSEFKNNFDGGINK(bi)EVSVPR_;_NYVSEFK(bi)NNFDGGINKEVSVPR_;_NYVSEFK(bi)NNFDGGINK(bi)EVSVPR_
PF3D7_0202000	P. falciparum	knob-associated histidine-rich protein				21.9271	21.8091	20.7269	22.3425	22.0688	21.4642							2 Biotin (K)	0	2			22008000	5.8e-05	104.21	56.433	8	4	3	2569.18	27.624	PGGGFKAYEEKYESKHYK	117	NaN	NaN	NaN		NaN	NaN	NaN		147	164	_PGGGFK(bi)AYEEKYESKHYK(bi)_;_PGGGFK(bi)AYEEKYESK(bi)HYK_;_PGGGFK(bi)AYEEKYESKHYK(bi)_;_PGGGFK(bi)AYEEKYESKHYK(bi)_;_PGGGFK(bi)AYEEKYESKHYK(bi)_;_PGGGFK(bi)AYEEKYESKHYK(bi)_;_PGGGFKAYEEKYESKHYK(bi)_;_PGGGFKAYEEKYESK(bi)HYK_;_PGGGFKAYEEKYESK(bi)HYK_	PGGGFK(1)AYEEK(0.001)YESK(0.437)HYK(0.562);PGGGFK(0.999)AYEEK(0.036)YESK(0.676)HYK(0.288);PGGGFK(1)AYEEK(0.001)YESK(0.4)HYK(0.599);PGGGFK(1)AYEEKYESK(0.37)HYK(0.63);PGGGFK(1)AYEEK(0.006)YESK(0.41)HYK(0.584);PGGGFK(1)AYEEK(0.001)YESK(0.089)HYK(0.911);PGGGFKAYEEK(0.009)YESK(0.4)HYK(0.59);PGGGFKAYEEK(0.001)YESK(0.792)HYK(0.208)	PGGGFK(59.7)AYEEK(-27.8)YESK(-1.09)HYK(1.09);PGGGFK(33.94)AYEEK(-12.77)YESK(3.71)HYK(-3.71);PGGGFK(49.63)AYEEK(-27.11)YESK(-1.75)HYK(1.75);PGGGFK(65.98)AYEEK(-35.63)YESK(-2.31)HYK(2.31);PGGGFK(43.18)AYEEK(-20.23)YESK(-1.54)HYK(1.54);PGGGFK(33.94)AYEEK(-33.94)YESK(-10.09)HYK(10.09);PGGGFK(-60.85)AYEEK(-18.08)YESK(-1.69)HYK(1.69);PGGGFK(-63.75)AYEEK(-29.45)YESK(5.81)HYK(-5.81)			_PGGGFK(bi)AYEEKYESKHYK(bi)_;_PGGGFK(bi)AYEEKYESK(bi)HYK_;_PGGGFKAYEEKYESKHYK(bi)_;_PGGGFKAYEEKYESK(bi)HYK_
PF3D7_0730900	P. falciparum	EMP1-trafficking protein												21.7444	22.258	21.445	22.2025	2 Biotin (K)	0	2			16210000	1.68e-10	156.13	97.418	5	3	2	2863.25	27.532	QDFPYKNENNHKMYNVNEK	222	1	156.13	77.6888	+	NaN	NaN	NaN		1203	1221	_QDFPYKNENNHK(bi)M(ox)YNVNEK_;_QDFPYKNENNHK(bi)M(ox)YNVNEK_;_QDFPYKNENNHK(bi)M(ox)YNVNEK_;_QDFPYK(bi)NENNHK(bi)MYNVNEK_;_QDFPYK(bi)NENNHK(bi)MYNVNEK_;_QDFPYK(bi)NENNHK(bi)MYNVNEK_;_QDFPYK(bi)NENNHK(bi)MYNVNEK_;_QDFPYK(bi)NENNHK(bi)MYNVNEK_	QDFPYK(0.211)NENNHK(0.789)MYNVNEK;QDFPYK(0.029)NENNHK(0.91)MYNVNEK(0.061);QDFPYK(1)NENNHK(1)MYNVNEK;QDFPYK(1)NENNHK(0.999)MYNVNEK(0.001);QDFPYK(1)NENNHK(1)MYNVNEK;QDFPYK(0.995)NENNHK(0.991)MYNVNEK(0.013);QDFPYK(0.999)NENNHK(0.987)MYNVNEK(0.014)	QDFPYK(-5.72)NENNHK(5.72)MYNVNEK(-34.32);QDFPYK(-15)NENNHK(11.72)MYNVNEK(-11.72);QDFPYK(77.69)NENNHK(53.56)MYNVNEK(-53.56);QDFPYK(41.23)NENNHK(28.65)MYNVNEK(-28.65);QDFPYK(46.6)NENNHK(44.74)MYNVNEK(-44.74);QDFPYK(23.34)NENNHK(20.51)MYNVNEK(-20.51);QDFPYK(30.01)NENNHK(18.78)MYNVNEK(-18.78)			_QDFPYKNENNHK(bi)M(ox)YNVNEK_;_QDFPYK(bi)NENNHK(bi)MYNVNEK_
PF3D7_0730900	P. falciparum	EMP1-trafficking protein										24.9672	24.239	24.1253	24.7234	24.2021	24.4862	2 Biotin (K)	0	2			141460000	4.24e-05	109.56	66.693	21	NaN	3	3445.55	26.259	QDFPYKNENNHKMYNVNEKEEVPK	222	NaN	NaN	NaN		NaN	NaN	NaN		1203	1226	_QDFPYKNENNHK(bi)M(ox)YNVNEKEEVPK_;_QDFPYK(bi)NENNHKM(ox)YNVNEKEEVPK_;_QDFPYKNENNHK(bi)M(ox)YNVNEKEEVPK_;_QDFPYK(bi)NENNHKM(ox)YNVNEKEEVPK_;_QDFPYK(bi)NENNHKM(ox)YNVNEKEEVPK_;_QDFPYKNENNHK(bi)M(ox)YNVNEKEEVPK_;_QDFPYK(bi)NENNHKM(ox)YNVNEKEEVPK_;_QDFPYK(bi)NENNHKM(ox)YNVNEKEEVPK_;_QDFPYK(bi)NENNHKM(ox)YNVNEKEEVPK_;_QDFPYKNENNHK(bi)MYNVNEKEEVPK_;_QDFPYKNENNHK(bi)MYNVNEKEEVPK_;_QDFPYK(bi)NENNHKMYNVN…	QDFPYK(0.234)NENNHK(0.766)MYNVNEKEEVPK;QDFPYK(0.504)NENNHK(0.495)MYNVNEKEEVPK;QDFPYK(0.005)NENNHK(0.988)MYNVNEK(0.007)EEVPK;QDFPYK(0.5)NENNHK(0.5)MYNVNEKEEVPK;QDFPYK(0.908)NENNHK(0.092)MYNVNEKEEVPK;QDFPYK(0.428)NENNHK(0.572)MYNVNEKEEVPK;QDFPYK(0.006)NENNHK(0.994)MYNVNEKEEVPK;QDFPYK(0.029)NENNHK(0.971)MYNVNEKEEVPK;QDFPYK(0.825)NENNHK(0.175)MYNVNEKEEVPK;QDFPYK(0.999)NENNHK(0.001)MYNVNEKEEVPK;QDFPYK…	QDFPYK(-5.16)NENNHK(5.16)MYNVNEK(-46.42)EEVPK(-53.44);QDFPYK(0.08)NENNHK(-0.08)MYNVNEK(-32.86)EEVPK(-36.29);QDFPYK(-23.17)NENNHK(21.77)MYNVNEK(-21.77)EEVPK(-36.23);QDFPYK(0)NENNHK(0)MYNVNEK(-42.01)EEVPK(-48.16);QDFPYK(9.96)NENNHK(-9.96)MYNVNEK(-34.37)EEVPK(-37.31);QDFPYK(-1.26)NENNHK(1.26)MYNVNEK(-38.61)EEVPK(-43.25);QDFPYK(-22.46)NENNHK(22.46)MYNVNEK(-60.98)EEVPK(-71.81);QDFPYK(-15.28)NENNHK(15.…			_QDFPYKNENNHK(bi)M(ox)YNVNEKEEVPK_;_QDFPYK(bi)NENNHKM(ox)YNVNEKEEVPK_;_QDFPYKNENNHK(bi)MYNVNEKEEVPK_;_QDFPYK(bi)NENNHKMYNVNEKEEVPK_;_QDFPYK(bi)NENNHK(bi)M(ox)YNVNEKEEVPK_;_QDFPYK(bi)NENNHK(bi)MYNVNEKEEVPK_
PF3D7_0500800	P. falciparum	mature parasite-infected erythrocyte surface antigen				22.0219	21.8205	21.4017	22.4403	22.5891	22.3739							2 Biotin (K)	0	2			28168000	0.0072044	128.27	7.2808	8	2	2	1410.7	23.933	QKAELDKK	159	1	160.915	90.2409	+	NaN	NaN	NaN		1372	1379	_QK(bi)AELDKK_;_QK(bi)AELDKK_;_QK(bi)AELDKK_;_QK(bi)AELDKK_;_QK(bi)AELDKK_;_QKAELDK(bi)K_;_QK(bi)AELDKK_;_QKAELDK(bi)K_;_QK(bi)AELDKK_;_QKAELDK(bi)K_;_QK(bi)AELDKK_;_QKAELDK(bi)K_;_QK(bi)AELDKK_;_QK(bi)AELDKK_;_QK(bi)AELDKK_;_QK(bi)AELDKK_;_QK(bi)AELDKK_;_QK(bi)AELDKK_;_QK(bi)AELDKK_;_QK(bi)AELDKK_;_QK(bi)AELDKK_;_QK(bi)AELDKK_;_QK(bi)AELDKK_;_QK(bi)AELDKK_;_QK(bi)AELDKK_;_QK(bi)AELDKK_;_QK(bi)AE…	QK(1)AELDKK;QK(1)AELDKK;QK(1)AELDKK;QK(1)AELDKK;QK(1)AELDKK;QK(0.005)AELDK(0.994)K(0.001);QK(1)AELDKK;QKAELDK(0.993)K(0.007);QK(1)AELDKK;QKAELDK(0.988)K(0.012);QK(1)AELDKK;QKAELDK(0.993)K(0.007);QK(1)AELDKK;QK(1)AELDKK;QK(0.924)AELDK(0.076)K(0.001);QK(1)AELDKK;QK(1)AELDKK;QK(1)AELDKK;QK(1)AELDKK;QK(1)AELDKK;QK(1)AELDKK;QK(1)AELDK(0.999)K(0.001);QK(1)AELDK(1)K;QK(1)AELDK(0.999)K(0.001);QK(1)AELDK(…	QK(97.58)AELDK(-97.58)K(-118.6);QK(45.42)AELDK(-45.42)K(-65.65);QK(52.25)AELDK(-52.25)K(-65.78);QK(90.64)AELDK(-90.64)K(-131.68);QK(120.12)AELDK(-120.12)K(-136.32);QK(-22.99)AELDK(22.99)K(-30.44);QK(100.24)AELDK(-100.24)K(-121.3);QK(-43.11)AELDK(21.26)K(-21.26);QK(136.91)AELDK(-136.91)K(-159.73);QK(-36.24)AELDK(19.27)K(-19.27);QK(108.41)AELDK(-108.41)K(-128.84);QK(-43.57)AELDK(21.41)K(-21.41);QK(…			_QK(bi)AELDKK_;_QKAELDK(bi)K_;_QK(bi)AELDK(bi)K_
PF3D7_1354300	P. falciparum	large subunit rRNA methyltransferase, putative									22.9966							2 Biotin (K)	0	2			8368900	0.034315	65.565	16.956	1	3	3	2332.12	35.216	RAMDFKNEELMKIQK	403	NaN	NaN	NaN		NaN	NaN	NaN		578	592	_RAMDFK(bi)NEELMK(bi)IQK_	RAMDFK(1)NEELMK(0.832)IQK(0.168)	RAMDFK(40.11)NEELMK(6.94)IQK(-6.94)			_RAMDFK(bi)NEELMK(bi)IQK_
PF3D7_0730900	P. falciparum	EMP1-trafficking protein										25.1719	24.9089	24.6209	24.6811	24.7441	24.8997	2 Biotin (K)	0	2			181290000	5.83e-16	187.56	123.24	18	NaN	3	2546.21	33.654	RKFVSELKSNTYSYMNK	222	1	174.68	141.733	+	NaN	NaN	NaN		987	1003	_RKFVSELK(bi)SNTYSYMNK_;_RKFVSELK(bi)SNTYSYMNK_;_RK(bi)FVSELK(bi)SNTYSYM(ox)NK_;_RK(bi)FVSELK(bi)SNTYSYM(ox)NK_;_RK(bi)FVSELK(bi)SNTYSYM(ox)NK_;_RK(bi)FVSELK(bi)SNTYSYM(ox)NK_;_RK(bi)FVSELK(bi)SNTYSYM(ox)NK_;_RK(bi)FVSELK(bi)SNTYSYMNK_;_RK(bi)FVSELK(bi)SNTYSYMNK_;_RK(bi)FVSELK(bi)SNTYSYMNK_;_RK(bi)FVSELK(bi)SNTYSYMNK_;_RK(bi)FVSELK(bi)SNTYSYMNK_;_RK(bi)FVSELK(bi)SNTYSYMNK_;_RK(bi)FVSELK(bi)SNTYSY…	RK(0.005)FVSELK(0.995)SNTYSYMNK;RK(1)FVSELK(1)SNTYSYMNK;RK(1)FVSELK(1)SNTYSYMNK;RK(1)FVSELK(0.999)SNTYSYMNK(0.001);RK(1)FVSELK(1)SNTYSYMNK;RK(1)FVSELK(1)SNTYSYMNK;RK(1)FVSELK(1)SNTYSYMNK;RK(1)FVSELK(1)SNTYSYMNK;RK(1)FVSELK(1)SNTYSYMNK;RK(1)FVSELK(1)SNTYSYMNK;RK(1)FVSELK(1)SNTYSYMNK;RK(0.016)FVSELK(0.984)SNTYSYMNK;RK(0.009)FVSELK(0.991)SNTYSYMNK;RK(0.001)FVSELK(0.999)SNTYSYMNK;RK(0.002)FVSELK(0.99…	RK(-22.67)FVSELK(22.67)SNTYSYMNK(-91.28);RK(87.35)FVSELK(62.59)SNTYSYMNK(-62.59);RK(65.53)FVSELK(55.13)SNTYSYMNK(-55.13);RK(77.65)FVSELK(29.44)SNTYSYMNK(-29.44);RK(158.02)FVSELK(96.88)SNTYSYMNK(-96.88);RK(146.22)FVSELK(120.83)SNTYSYMNK(-120.83);RK(154.33)FVSELK(104.23)SNTYSYMNK(-104.23);RK(114.47)FVSELK(76.29)SNTYSYMNK(-76.29);RK(130.01)FVSELK(91.82)SNTYSYMNK(-91.82);RK(169.09)FVSELK(104.31)SNTYS…			_RKFVSELK(bi)SNTYSYMNK_;_RK(bi)FVSELK(bi)SNTYSYM(ox)NK_;_RK(bi)FVSELK(bi)SNTYSYMNK_;_RKFVSELK(bi)SNTYSYM(ox)NK_
PF3D7_0201800	P. falciparum	knob associated heat shock protein 40									20.4503							2 Biotin (K)	0	2			1432700	0.0024625	89.557	52.38	4	3	3	2511.19	41.46	RTDPNDVFSKFFKTETK	115	NaN	NaN	NaN		NaN	NaN	NaN		175	191	_RTDPNDVFSK(bi)FFKTETK_;_RTDPNDVFSKFFK(bi)TETK_;_RTDPNDVFSK(bi)FFKTETK_;_RTDPNDVFSK(bi)FFKTETK_;_RTDPNDVFSKFFK(bi)TETK_;_RTDPNDVFSK(bi)FFKTETK_;_RTDPNDVFSK(bi)FFK(bi)TETK_;_RTDPNDVFSK(bi)FFK(bi)TETK_	RTDPNDVFSK(1)FFKTETK;RTDPNDVFSK(0.001)FFK(0.998)TETK;RTDPNDVFSK(1)FFKTETK;RTDPNDVFSK(1)FFK(0.801)TETK(0.199);RTDPNDVFSK(1)FFK(0.999)TETK(0.001)	RTDPNDVFSK(45.46)FFK(-45.46)TETK(-56.23);RTDPNDVFSK(-28.34)FFK(28.34)TETK(-34.92);RTDPNDVFSK(34.89)FFK(-34.89)TETK(-64.35);RTDPNDVFSK(42.41)FFK(6.04)TETK(-6.04);RTDPNDVFSK(55.64)FFK(31.76)TETK(-31.76)			_RTDPNDVFSK(bi)FFKTETK_;_RTDPNDVFSKFFK(bi)TETK_;_RTDPNDVFSK(bi)FFK(bi)TETK_
PF3D7_0730900	P. falciparum	EMP1-trafficking protein										21.5455		21.2387	21.1356	21.7216	21.9629	2 Biotin (K)	0	2			15385000	2.85e-06	153	94.308	7	3	2	2197.03	31.108	SDIGNFKNSLHKEEK	222	1	153	92.064	+	NaN	NaN	NaN		1765	1779	_SDIGNFK(bi)NSLHKEEK_;_SDIGNFK(bi)NSLHKEEK_;_SDIGNFK(bi)NSLHKEEK_;_SDIGNFKNSLHK(bi)EEK_;_SDIGNFK(bi)NSLHKEEK_;_SDIGNFK(bi)NSLHKEEK_;_SDIGNFK(bi)NSLHKEEK_;_SDIGNFK(bi)NSLHKEEK_;_SDIGNFK(bi)NSLHKEEK_;_SDIGNFK(bi)NSLHKEEK_;_SDIGNFKNSLHK(bi)EEK_;_SDIGNFK(bi)NSLHKEEK_;_SDIGNFK(bi)NSLHKEEK_;_SDIGNFK(bi)NSLHKEEK_;_SDIGNFK(bi)NSLHKEEK_;_SDIGNFK(bi)NSLHKEEK_;_SDIGNFK(bi)NSLHKEEK_;_SDIGNFK(bi)NSLHKEEK_;_SD…	SDIGNFK(1)NSLHKEEK;SDIGNFK(0.996)NSLHK(0.004)EEK;SDIGNFK(0.962)NSLHK(0.037)EEK(0.001);SDIGNFK(0.478)NSLHK(0.521)EEK(0.001);SDIGNFK(1)NSLHKEEK;SDIGNFK(0.945)NSLHK(0.055)EEK;SDIGNFK(0.821)NSLHK(0.178)EEK(0.001);SDIGNFK(0.989)NSLHK(0.01)EEK(0.001);SDIGNFK(1)NSLHKEEK;SDIGNFK(1)NSLHKEEK;SDIGNFK(0.486)NSLHK(0.511)EEK(0.003);SDIGNFK(1)NSLHKEEK;SDIGNFK(0.731)NSLHK(0.22)EEK(0.05);SDIGNFK(0.992)NSLHK(0.008…	SDIGNFK(39.21)NSLHK(-39.21)EEK(-48.81);SDIGNFK(24.41)NSLHK(-24.41)EEK(-57);SDIGNFK(14.1)NSLHK(-14.1)EEK(-29.7);SDIGNFK(-0.37)NSLHK(0.37)EEK(-28.34);SDIGNFK(39.12)NSLHK(-39.12)EEK(-44.69);SDIGNFK(12.33)NSLHK(-12.33)EEK(-36.23);SDIGNFK(6.64)NSLHK(-6.64)EEK(-29.39);SDIGNFK(19.89)NSLHK(-19.89)EEK(-29.91);SDIGNFK(47.19)NSLHK(-47.19)EEK(-63.44);SDIGNFK(38.22)NSLHK(-38.22)EEK(-71.99);SDIGNFK(-0.21)NSLHK…			_SDIGNFK(bi)NSLHKEEK_;_SDIGNFKNSLHK(bi)EEK_;_SDIGNFK(bi)NSLHK(bi)EEK_
PF3D7_0730900	P. falciparum	EMP1-trafficking protein										25.4041	25.3031	25.1757	24.7746	24.6703	24.8997	2 Biotin (K)	0	2			210420000	9.19e-23	144.4	118.49	23	4	3	4354.03	29.352	SFSSQGIREDFPYENENNKHSGLNTPKNIPVNNR	222	1	108.78	108.779	+	NaN	NaN	NaN		1675	1708	_SFSSQGIREDFPYENENNKHSGLNTPK(bi)NIPVNNR_;_SFSSQGIREDFPYENENNKHSGLNTPK(bi)NIPVNNR_;_SFSSQGIREDFPYENENNKHSGLNTPK(bi)NIPVNNR_;_SFSSQGIREDFPYENENNKHSGLNTPK(bi)NIPVNNR_;_SFSSQGIREDFPYENENNKHSGLNTPK(bi)NIPVNNR_;_SFSSQGIREDFPYENENNKHSGLNTPK(bi)NIPVNNR_;_SFSSQGIREDFPYENENNKHSGLNTPK(bi)NIPVNNR_;_SFSSQGIREDFPYENENNKHSGLNTPK(bi)NIPVNNR_;_SFSSQGIREDFPYENENNKHSGLNTPK(bi)NIPVNNR_;_SFSSQGIREDFPYENENNKHSGLNTPK(b…	SFSSQGIREDFPYENENNK(0.051)HSGLNTPK(0.949)NIPVNNR;SFSSQGIREDFPYENENNK(0.019)HSGLNTPK(0.981)NIPVNNR;SFSSQGIREDFPYENENNK(0.001)HSGLNTPK(0.999)NIPVNNR;SFSSQGIREDFPYENENNK(0.036)HSGLNTPK(0.964)NIPVNNR;SFSSQGIREDFPYENENNK(0.001)HSGLNTPK(0.999)NIPVNNR;SFSSQGIREDFPYENENNK(0.048)HSGLNTPK(0.952)NIPVNNR;SFSSQGIREDFPYENENNKHSGLNTPK(1)NIPVNNR;SFSSQGIREDFPYENENNK(0.009)HSGLNTPK(0.991)NIPVNNR;SFSSQGIREDFPYENENN…	SFSSQGIREDFPYENENNK(-12.7)HSGLNTPK(12.7)NIPVNNR;SFSSQGIREDFPYENENNK(-17.21)HSGLNTPK(17.21)NIPVNNR;SFSSQGIREDFPYENENNK(-29.35)HSGLNTPK(29.35)NIPVNNR;SFSSQGIREDFPYENENNK(-14.22)HSGLNTPK(14.22)NIPVNNR;SFSSQGIREDFPYENENNK(-32.08)HSGLNTPK(32.08)NIPVNNR;SFSSQGIREDFPYENENNK(-13)HSGLNTPK(13)NIPVNNR;SFSSQGIREDFPYENENNK(-41.32)HSGLNTPK(41.32)NIPVNNR;SFSSQGIREDFPYENENNK(-20.51)HSGLNTPK(20.51)NIPVNNR;SFSSQGI…			_SFSSQGIREDFPYENENNKHSGLNTPK(bi)NIPVNNR_;_SFSSQGIREDFPYENENNK(bi)HSGLNTPK(bi)NIPVNNR_
PF3D7_1301400	P. falciparum	Plasmodium exported protein (hyp12), unknown function					21.5669			21.9991	21.7688							2 Biotin (K)	0	2			10872000	0.00014217	99.078	47.467	7	4	3	3413.66	32.451	SKNMNIPKHNANSEYLLDKNLYDLK	373	NaN	NaN	NaN		NaN	NaN	NaN		173	197	_SKNMNIPK(bi)HNANSEYLLDK(bi)NLYDLK_;_SK(bi)NMNIPKHNANSEYLLDK(bi)NLYDLK_;_SKNMNIPK(bi)HNANSEYLLDK(bi)NLYDLK_;_SKNM(ox)NIPK(bi)HNANSEYLLDK(bi)NLYDLK_;_SK(bi)NM(ox)NIPKHNANSEYLLDK(bi)NLYDLK_	SK(0.014)NMNIPK(0.986)HNANSEYLLDK(1)NLYDLK;SK(0.596)NMNIPK(0.404)HNANSEYLLDK(0.999)NLYDLK(0.001);SK(0.044)NMNIPK(0.956)HNANSEYLLDK(1)NLYDLK;SK(0.319)NMNIPK(0.681)HNANSEYLLDK(0.986)NLYDLK(0.014);SK(0.567)NMNIPK(0.445)HNANSEYLLDK(0.987)NLYDLK	SK(-18.38)NMNIPK(18.38)HNANSEYLLDK(47.06)NLYDLK(-47.06);SK(1.69)NMNIPK(-1.69)HNANSEYLLDK(33.16)NLYDLK(-33.16);SK(-13.35)NMNIPK(13.35)HNANSEYLLDK(43.56)NLYDLK(-43.56);SK(-3.29)NMNIPK(3.29)HNANSEYLLDK(18.39)NLYDLK(-18.39);SK(1.08)NMNIPK(-1.08)HNANSEYLLDK(16.49)NLYDLK(-35.91)			_SKNMNIPK(bi)HNANSEYLLDK(bi)NLYDLK_;_SK(bi)NMNIPKHNANSEYLLDK(bi)NLYDLK_;_SKNM(ox)NIPK(bi)HNANSEYLLDK(bi)NLYDLK_;_SK(bi)NM(ox)NIPKHNANSEYLLDK(bi)NLYDLK_
PF3D7_0730900	P. falciparum	EMP1-trafficking protein										21.1531						2 Biotin (K)	0	2			2332000	0.0057527	72.399	25.437	2	3	3	3036.45	33.214	SKNVLEKYNDYASKSHGMSSVLK	222	1	126.93	106.389	+	NaN	NaN	NaN		155	177	_SKNVLEK(bi)YNDYASK(bi)SHGMSSVLK_;_SKNVLEK(bi)YNDYASK(bi)SHGMSSVLK_;_SK(bi)NVLEK(bi)YNDYASK(bi)SHGM(ox)SSVLK_;_SK(bi)NVLEK(bi)YNDYASK(bi)SHGM(ox)SSVLK_;_SK(bi)NVLEK(bi)YNDYASK(bi)SHGMSSVLK_;_SK(bi)NVLEK(bi)YNDYASK(bi)SHGMSSVLK_;_SK(bi)NVLEK(bi)YNDYASK(bi)SHGMSSVLK_;_SK(bi)NVLEK(bi)YNDYASK(bi)SHGMSSVLK_;_SK(bi)NVLEK(bi)YNDYASK(bi)SHGMSSVLK_;_SK(bi)NVLEK(bi)YNDYASK(bi)SHGMSSVLK_	SK(0.008)NVLEK(0.992)YNDYASK(0.997)SHGMSSVLK(0.003);SKNVLEK(1)YNDYASK(0.999)SHGMSSVLK(0.001);SK(1)NVLEK(1)YNDYASK(0.998)SHGMSSVLK(0.002);SK(1)NVLEK(1)YNDYASK(0.997)SHGMSSVLK(0.003);SK(1)NVLEK(1)YNDYASK(0.999)SHGMSSVLK(0.001);SK(1)NVLEK(1)YNDYASK(1)SHGMSSVLK;SK(1)NVLEK(1)YNDYASK(0.996)SHGMSSVLK(0.004);SK(1)NVLEK(1)YNDYASK(0.996)SHGMSSVLK(0.004);SK(1)NVLEK(1)YNDYASK(1)SHGMSSVLK;SK(1)NVLEK(1)YNDYASK…	SK(-21.1)NVLEK(21.1)YNDYASK(24.75)SHGMSSVLK(-24.75);SK(-42.09)NVLEK(42.09)YNDYASK(29.74)SHGMSSVLK(-29.74);SK(87.81)NVLEK(61.06)YNDYASK(27.28)SHGMSSVLK(-27.28);SK(77.69)NVLEK(47.27)YNDYASK(25.97)SHGMSSVLK(-25.97);SK(120.3)NVLEK(85.65)YNDYASK(31.67)SHGMSSVLK(-31.67);SK(151.91)NVLEK(110.89)YNDYASK(46.47)SHGMSSVLK(-46.47);SK(112.18)NVLEK(71.6)YNDYASK(23.88)SHGMSSVLK(-23.88);SK(83.32)NVLEK(48.44)YNDYA…			_SKNVLEK(bi)YNDYASK(bi)SHGMSSVLK_;_SK(bi)NVLEK(bi)YNDYASK(bi)SHGM(ox)SSVLK_;_SK(bi)NVLEK(bi)YNDYASK(bi)SHGMSSVLK_
PF3D7_1445400	P. falciparum	protein serine/threonine kinase-1										24.1015	22.3163	22.982	22.3932	23.029	21.8471	2 Biotin (K)	0	2			49299000	0.0044465	91.712	23.866	1	3	3	2168.04	34.825	SKNYNTYNLEKSKK	451	NaN	NaN	NaN		NaN	NaN	NaN		219	232	_SK(bi)NYNTYNLEKSKK(bi)_;_SK(bi)NYNTYNLEKSKK(bi)_;_SK(bi)NYNTYNLEKSKK(bi)_;_SK(bi)NYNTYNLEKSKK(bi)_;_SK(bi)NYNTYNLEKSKK(bi)_;_SK(bi)NYNTYNLEKSKK(bi)_;_SK(bi)NYNTYNLEKSKK(bi)_	SK(1)NYNTYNLEK(0.177)SK(0.042)K(0.781)	SK(65.77)NYNTYNLEK(-6.44)SK(-12.73)K(6.44)			_SK(bi)NYNTYNLEKSKK(bi)_
PF3D7_0730900	P. falciparum	EMP1-trafficking protein										24.1253				23.3645		2 Biotin (K)	0	2			29064000	4.02e-10	124.85	88.546	8	4	2	3910.76	27.548	SMSVANTKSHVQQNVKTFSSNHYENENNHK	222	1	124.85	103.508	+	NaN	NaN	NaN		1089	1118	_SMSVANTK(bi)SHVQQNVK(bi)TFSSNHYENENNHK_;_SMSVANTK(bi)SHVQQNVK(bi)TFSSNHYENENNHK_	SMSVANTK(1)SHVQQNVK(1)TFSSNHYENENNHK;SMSVANTK(1)SHVQQNVK(1)TFSSNHYENENNHK	SMSVANTK(106.96)SHVQQNVK(100.73)TFSSNHYENENNHK(-100.73);SMSVANTK(111.82)SHVQQNVK(95.19)TFSSNHYENENNHK(-95.19)			_SMSVANTK(bi)SHVQQNVK(bi)TFSSNHYENENNHK_
PF3D7_0730900	P. falciparum	EMP1-trafficking protein										25.4488	25.1871	25.0854	25.1015	25.0854	25.2317	2 Biotin (K)	0	2			230460000	3.57e-19	175.65	98.867	11	NaN	2	2940.4	41.963	SNSDGGINKEIYTPKIYVSEFK	222	1	107.21	98.1909	+	NaN	NaN	NaN		489	510	_SNSDGGINKEIYTPK(bi)IYVSEFK_;_SNSDGGINKEIYTPK(bi)IYVSEFK_;_SNSDGGINKEIYTPK(bi)IYVSEFK_;_SNSDGGINKEIYTPK(bi)IYVSEFK_;_SNSDGGINKEIYTPK(bi)IYVSEFK_;_SNSDGGINKEIYTPK(bi)IYVSEFK_;_SNSDGGINKEIYTPK(bi)IYVSEFK_;_SNSDGGINKEIYTPK(bi)IYVSEFK_;_SNSDGGINKEIYTPK(bi)IYVSEFK_;_SNSDGGINKEIYTPK(bi)IYVSEFK_;_SNSDGGINKEIYTPK(bi)IYVSEFK_;_SNSDGGINKEIYTPK(bi)IYVSEFK_;_SNSDGGINKEIYTPK(bi)IYVSEFK_;_SNSDGGINKEIYTPK(bi)IY…	SNSDGGINKEIYTPK(1)IYVSEFK;SNSDGGINKEIYTPK(0.998)IYVSEFK(0.002);SNSDGGINKEIYTPK(0.999)IYVSEFK(0.001);SNSDGGINKEIYTPK(1)IYVSEFK;SNSDGGINKEIYTPK(0.999)IYVSEFK(0.001);SNSDGGINKEIYTPK(1)IYVSEFK;SNSDGGINKEIYTPK(1)IYVSEFK;SNSDGGINKEIYTPK(1)IYVSEFK;SNSDGGINKEIYTPK(1)IYVSEFK;SNSDGGINKEIYTPK(1)IYVSEFK;SNSDGGINKEIYTPK(1)IYVSEFK;SNSDGGINKEIYTPK(1)IYVSEFK;SNSDGGINKEIYTPK(1)IYVSEFK;SNSDGGINKEIYTPK(1)IYVSEFK;SN…	SNSDGGINK(-91.8)EIYTPK(37.69)IYVSEFK(-37.69);SNSDGGINK(-80.76)EIYTPK(27.28)IYVSEFK(-27.28);SNSDGGINK(-116.21)EIYTPK(32.43)IYVSEFK(-32.43);SNSDGGINK(-78.66)EIYTPK(44.21)IYVSEFK(-44.21);SNSDGGINK(-105.63)EIYTPK(29.15)IYVSEFK(-29.15);SNSDGGINK(-132.41)EIYTPK(48.6)IYVSEFK(-48.6);SNSDGGINK(-180.87)EIYTPK(50.21)IYVSEFK(-50.21);SNSDGGINK(-59.73)EIYTPK(47.38)IYVSEFK(-47.38);SNSDGGINK(-173.7)EIYTPK(61.76)…			_SNSDGGINKEIYTPK(bi)IYVSEFK_;_SNSDGGINK(bi)EIYTPK(bi)IYVSEFK_
PF3D7_0730900	P. falciparum	EMP1-trafficking protein										22.1691	22.2828	21.7165	22.0166			2 Biotin (K)	0	2			17507000	9.08e-20	150.92	108.09	8	4	2	3874.74	23.57	SNTHDGMNNKVNTTNNAPNVIKSNTHGGMNNK	222	0.999999	145.78	95.4347	+	NaN	NaN	NaN		312	343	_SNTHDGMNNKVNTTNNAPNVIK(bi)SNTHGGMNNK_;_SNTHDGMNNKVNTTNNAPNVIK(bi)SNTHGGMNNK_;_SNTHDGMNNKVNTTNNAPNVIK(bi)SNTHGGMNNK_;_SNTHDGMNNKVNTTNNAPNVIK(bi)SNTHGGMNNK_;_SNTHDGMNNKVNTTNNAPNVIK(bi)SNTHGGMNNK_;_SNTHDGMNNKVNTTNNAPNVIK(bi)SNTHGGMNNK_;_SNTHDGMNNKVNTTNNAPNVIK(bi)SNTHGGMNNK_;_SNTHDGMNNKVNTTNNAPNVIK(bi)SNTHGGMNNK_;_SNTHDGMNNKVNTTNNAPNVIK(bi)SNTHGGMNNK_;_SNTHDGMNNKVNTTNNAPNVIK(bi)SNTHGGMNNK_;_SNTHDGMN…	SNTHDGMNNKVNTTNNAPNVIK(0.999)SNTHGGMNNK(0.001);SNTHDGMNNKVNTTNNAPNVIK(1)SNTHGGMNNK;SNTHDGMNNKVNTTNNAPNVIK(0.99)SNTHGGMNNK(0.01);SNTHDGMNNKVNTTNNAPNVIK(0.999)SNTHGGMNNK(0.001);SNTHDGMNNKVNTTNNAPNVIK(0.997)SNTHGGMNNK(0.003);SNTHDGMNNK(0.001)VNTTNNAPNVIK(0.996)SNTHGGMNNK(0.003);SNTHDGMNNKVNTTNNAPNVIK(1)SNTHGGMNNK;SNTHDGMNNKVNTTNNAPNVIK(1)SNTHGGMNNK;SNTHDGMNNKVNTTNNAPNVIK(1)SNTHGGMNNK;SNTHDGMNNKVNTTN…	SNTHDGMNNK(-92.95)VNTTNNAPNVIK(32.38)SNTHGGMNNK(-32.38);SNTHDGMNNK(-89.75)VNTTNNAPNVIK(52.48)SNTHGGMNNK(-52.48);SNTHDGMNNK(-61.81)VNTTNNAPNVIK(20.06)SNTHGGMNNK(-20.06);SNTHDGMNNK(-72.05)VNTTNNAPNVIK(29.46)SNTHGGMNNK(-29.46);SNTHDGMNNK(-45.93)VNTTNNAPNVIK(24.88)SNTHGGMNNK(-24.88);SNTHDGMNNK(-29.89)VNTTNNAPNVIK(25.39)SNTHGGMNNK(-25.39);SNTHDGMNNK(-99.55)VNTTNNAPNVIK(58.86)SNTHGGMNNK(-58.86);SNTHDGM…			_SNTHDGMNNKVNTTNNAPNVIK(bi)SNTHGGMNNK_;_SNTHDGM(ox)NNKVNTTNNAPNVIK(bi)SNTHGGM(ox)NNK_;_SNTHDGM(ox)NNKVNTTNNAPNVIK(bi)SNTHGGMNNK_;_SNTHDGMNNK(bi)VNTTNNAPNVIK(bi)SNTHGGMNNK_
PF3D7_0730900	P. falciparum	EMP1-trafficking protein										25.5783	25.4551	25.2996	25.5812	25.4645	25.3307	2 Biotin (K)	0	2			276150000	1.88e-22	183.18	117.58	30	NaN	2	2968.33	35.873	SNYDGGINKESYTTKSYVSEFK	222	1	182.295	122.337	+	NaN	NaN	NaN		467	488	_SNYDGGINKESYTTK(bi)SYVSEFK_;_SNYDGGINKESYTTK(bi)SYVSEFK_;_SNYDGGINKESYTTK(bi)SYVSEFK_;_SNYDGGINKESYTTK(bi)SYVSEFK_;_SNYDGGINKESYTTK(bi)SYVSEFK_;_SNYDGGINKESYTTK(bi)SYVSEFK_;_SNYDGGINKESYTTK(bi)SYVSEFK_;_SNYDGGINKESYTTK(bi)SYVSEFK_;_SNYDGGINKESYTTK(bi)SYVSEFK_;_SNYDGGINKESYTTK(bi)SYVSEFK_;_SNYDGGINKESYTTK(bi)SYVSEFK_;_SNYDGGINKESYTTK(bi)SYVSEFK_;_SNYDGGINKESYTTK(bi)SYVSEFK_;_SNYDGGINKESYTTK(bi)SY…	SNYDGGINKESYTTK(1)SYVSEFK;SNYDGGINKESYTTK(1)SYVSEFK;SNYDGGINKESYTTK(1)SYVSEFK;SNYDGGINKESYTTK(1)SYVSEFK;SNYDGGINKESYTTK(1)SYVSEFK;SNYDGGINKESYTTK(1)SYVSEFK;SNYDGGINKESYTTK(1)SYVSEFK;SNYDGGINKESYTTK(1)SYVSEFK;SNYDGGINKESYTTK(1)SYVSEFK;SNYDGGINKESYTTK(1)SYVSEFK;SNYDGGINKESYTTK(1)SYVSEFK;SNYDGGINKESYTTK(1)SYVSEFK;SNYDGGINKESYTTK(1)SYVSEFK;SNYDGGINKESYTTK(1)SYVSEFK;SNYDGGINKESYTTK(0.996)SYVSEFK(0.003…	SNYDGGINK(-178.73)ESYTTK(62.55)SYVSEFK(-62.55);SNYDGGINK(-164.62)ESYTTK(61.39)SYVSEFK(-61.39);SNYDGGINK(-120.36)ESYTTK(43.54)SYVSEFK(-43.54);SNYDGGINK(-131.4)ESYTTK(68.57)SYVSEFK(-68.57);SNYDGGINK(-151.55)ESYTTK(66.3)SYVSEFK(-66.3);SNYDGGINK(-139.12)ESYTTK(49.17)SYVSEFK(-49.17);SNYDGGINK(-95.61)ESYTTK(95.23)SYVSEFK(-95.23);SNYDGGINK(-146.75)ESYTTK(57.23)SYVSEFK(-57.23);SNYDGGINK(-66.38)ESYTTK(49.…			_SNYDGGINKESYTTK(bi)SYVSEFK_;_SNYDGGINK(bi)ESYTTK(bi)SYVSEFK_
PF3D7_0730900	P. falciparum	EMP1-trafficking protein										23.5404	23.1157		22.4777	22.7834	22.3597	2 Biotin (K)	0	2			39689000	1.96e-34	166.08	126.69	14	NaN	3	3840.72	34.519	SNYDGGINKESYTTKSYVSEFKSNSDGGINK	222	NaN	NaN	NaN		NaN	NaN	NaN		467	497	_SNYDGGINKESYTTK(bi)SYVSEFK(bi)SNSDGGINK_;_SNYDGGINKESYTTK(bi)SYVSEFK(bi)SNSDGGINK_;_SNYDGGINKESYTTK(bi)SYVSEFK(bi)SNSDGGINK_;_SNYDGGINKESYTTK(bi)SYVSEFK(bi)SNSDGGINK_;_SNYDGGINKESYTTK(bi)SYVSEFK(bi)SNSDGGINK_;_SNYDGGINKESYTTK(bi)SYVSEFK(bi)SNSDGGINK_	SNYDGGINKESYTTK(1)SYVSEFK(1)SNSDGGINK;SNYDGGINKESYTTK(1)SYVSEFK(1)SNSDGGINK;SNYDGGINKESYTTK(1)SYVSEFK(1)SNSDGGINK;SNYDGGINKESYTTK(1)SYVSEFK(1)SNSDGGINK;SNYDGGINKESYTTK(1)SYVSEFK(0.999)SNSDGGINK(0.001);SNYDGGINKESYTTK(1)SYVSEFK(1)SNSDGGINK	SNYDGGINK(-52.29)ESYTTK(52.29)SYVSEFK(51.35)SNSDGGINK(-51.35);SNYDGGINK(-44.27)ESYTTK(44.27)SYVSEFK(42.28)SNSDGGINK(-42.28);SNYDGGINK(-43.24)ESYTTK(43.24)SYVSEFK(54.97)SNSDGGINK(-54.97);SNYDGGINK(-62.59)ESYTTK(62.59)SYVSEFK(42.91)SNSDGGINK(-42.91);SNYDGGINK(-53.98)ESYTTK(53.98)SYVSEFK(29.05)SNSDGGINK(-29.05);SNYDGGINK(-38.34)ESYTTK(38.34)SYVSEFK(40.55)SNSDGGINK(-40.55)			_SNYDGGINKESYTTK(bi)SYVSEFK(bi)SNSDGGINK_
PF3D7_0301600	P. falciparum	Plasmodium exported protein (hyp1), unknown function															21.8645	2 Biotin (K)	0	2			3818200	8.53e-09	131.9	86.937	5	3	3	3115.34	27.568	SQYDTYKSQYDDRNKYSYPSR	131	1	131.9	131.9	+	NaN	NaN	NaN		265	285	_SQYDTYK(bi)SQYDDRNKYSYPSR_;_SQYDTYK(bi)SQYDDRNKYSYPSR_;_SQYDTYK(bi)SQYDDRNKYSYPSR_;_SQYDTYK(bi)SQYDDRNKYSYPSR_;_SQYDTYK(bi)SQYDDRNK(bi)YSYPSR_;_SQYDTYK(bi)SQYDDRNK(bi)YSYPSR_;_SQYDTYK(bi)SQYDDRNK(bi)YSYPSR_	SQYDTYK(0.999)SQYDDRNK(0.001)YSYPSR;SQYDTYK(1)SQYDDRNK(1)YSYPSR;SQYDTYK(1)SQYDDRNK(1)YSYPSR;SQYDTYK(1)SQYDDRNK(1)YSYPSR	SQYDTYK(32.38)SQYDDRNK(-32.38)YSYPSR;SQYDTYK(98.39)SQYDDRNK(98.39)YSYPSR;SQYDTYK(118.54)SQYDDRNK(118.54)YSYPSR;SQYDTYK(131.9)SQYDDRNK(131.9)YSYPSR			_SQYDTYK(bi)SQYDDRNKYSYPSR_;_SQYDTYK(bi)SQYDDRNK(bi)YSYPSR_
PF3D7_0202000	P. falciparum	knob-associated histidine-rich protein					20.6205											2 Biotin (K)	0	2			1612100	7.9e-07	120.56	78.865	2	3	3	2427.15	18.301	STNAATPGAKDKTQGGKTDK	117	0.985403	89.507	18.9513	+	NaN	NaN	NaN		501	520	_STNAATPGAK(bi)DKTQGGKTDK_;_STNAATPGAK(bi)DKTQGGKTDK_;_STNAATPGAKDKTQGGKTDK(bi)_;_STNAATPGAKDK(bi)TQGGKTDK_;_STNAATPGAK(bi)DKTQGGKTDK_;_STNAATPGAKDK(bi)TQGGKTDK_;_STNAATPGAKDK(bi)TQGGKTDK_;_STNAATPGAK(bi)DKTQGGKTDK_;_STNAATPGAKDKTQGGKTDK(bi)_;_STNAATPGAKDK(bi)TQGGKTDK_;_STNAATPGAKDKTQGGKTDK(bi)_;_STNAATPGAKDK(bi)TQGGKTDK_;_STNAATPGAKDK(bi)TQGGKTDK_;_STNAATPGAK(bi)DKTQGGKTDK_;_STNAATPGAKDK(bi)TQGG…	STNAATPGAK(0.833)DK(0.153)TQGGK(0.004)TDK(0.009);STNAATPGAK(0.638)DK(0.257)TQGGK(0.044)TDK(0.061);STNAATPGAK(0.002)DK(0.144)TQGGK(0.303)TDK(0.551);STNAATPGAK(0.027)DK(0.953)TQGGK(0.009)TDK(0.011);STNAATPGAK(0.985)DK(0.013)TQGGK(0.001)TDK(0.001);STNAATPGAK(0.029)DK(0.696)TQGGK(0.229)TDK(0.046);STNAATPGAK(0.015)DK(0.84)TQGGK(0.063)TDK(0.082);STNAATPGAK(0.666)DK(0.21)TQGGK(0.052)TDK(0.073);STNAATPGA…	STNAATPGAK(7.35)DK(-7.35)TQGGK(-22.7)TDK(-19.69);STNAATPGAK(3.95)DK(-3.95)TQGGK(-11.64)TDK(-10.2);STNAATPGAK(-23.64)DK(-5.82)TQGGK(-2.6)TDK(2.6);STNAATPGAK(-15.5)DK(15.5)TQGGK(-20.43)TDK(-19.2);STNAATPGAK(18.95)DK(-18.95)TQGGK(-28.68)TDK(-31.38);STNAATPGAK(-13.84)DK(4.83)TQGGK(-4.83)TDK(-11.78);STNAATPGAK(-17.57)DK(10.11)TQGGK(-11.21)TDK(-10.11);STNAATPGAK(5.02)DK(-5.02)TQGGK(-11.09)TDK(-9.6);STN…			_STNAATPGAK(bi)DKTQGGKTDK_;_STNAATPGAKDKTQGGKTDK(bi)_;_STNAATPGAKDK(bi)TQGGKTDK_;_STNAATPGAK(bi)DK(bi)TQGGKTDK_
PF3D7_0730900	P. falciparum	EMP1-trafficking protein										25.275	25.1719	24.945	24.9933	24.5285	25.1604	2 Biotin (K)	0	2			205800000	1.5e-18	165.49	116.66	37	NaN	3	2907.38	31.263	SYVSEFKNNDDGGLKKEISTPK	222	0.999993	149.16	81.2361	+	NaN	NaN	NaN		636	657	_SYVSEFKNNDDGGLKK(bi)EISTPK_;_SYVSEFKNNDDGGLKK(bi)EISTPK_;_SYVSEFK(bi)NNDDGGLKKEISTPK_;_SYVSEFK(bi)NNDDGGLKKEISTPK_;_SYVSEFKNNDDGGLKK(bi)EISTPK_;_SYVSEFKNNDDGGLKK(bi)EISTPK_;_SYVSEFK(bi)NNDDGGLKKEISTPK_;_SYVSEFK(bi)NNDDGGLKKEISTPK_;_SYVSEFKNNDDGGLKK(bi)EISTPK_;_SYVSEFKNNDDGGLK(bi)KEISTPK_;_SYVSEFK(bi)NNDDGGLKKEISTPK_;_SYVSEFKNNDDGGLKK(bi)EISTPK_;_SYVSEFKNNDDGGLKK(bi)EISTPK_;_SYVSEFK(bi)NNDDGGLKKE…	SYVSEFK(0.003)NNDDGGLK(0.2)K(0.784)EISTPK(0.013);SYVSEFKNNDDGGLK(0.34)K(0.655)EISTPK(0.005);SYVSEFK(1)NNDDGGLKKEISTPK;SYVSEFK(1)NNDDGGLKKEISTPK;SYVSEFKNNDDGGLK(0.287)K(0.713)EISTPK;SYVSEFK(0.001)NNDDGGLK(0.062)K(0.934)EISTPK(0.003);SYVSEFK(1)NNDDGGLKKEISTPK;SYVSEFK(1)NNDDGGLKKEISTPK;SYVSEFKNNDDGGLK(0.226)K(0.616)EISTPK(0.157);SYVSEFK(0.002)NNDDGGLK(0.499)K(0.499)EISTPK(0.001);SYVSEFK(1)NNDDGGLKKE…	SYVSEFK(-24.21)NNDDGGLK(-5.93)K(5.93)EISTPK(-17.83);SYVSEFK(-35.35)NNDDGGLK(-2.84)K(2.84)EISTPK(-21.15);SYVSEFK(40.81)NNDDGGLK(-40.81)K(-40.81)EISTPK(-53.23);SYVSEFK(65.49)NNDDGGLK(-65.49)K(-65.49)EISTPK(-74.66);SYVSEFK(-70.07)NNDDGGLK(-3.95)K(3.95)EISTPK(-37.68);SYVSEFK(-29.19)NNDDGGLK(-11.8)K(11.8)EISTPK(-24.37);SYVSEFK(71.39)NNDDGGLK(-71.39)K(-71.39)EISTPK(-77.16);SYVSEFK(56.17)NNDDGGLK(-56.17…			_SYVSEFKNNDDGGLKK(bi)EISTPK_;_SYVSEFK(bi)NNDDGGLKKEISTPK_;_SYVSEFKNNDDGGLK(bi)KEISTPK_;_SYVSEFK(bi)NNDDGGLK(bi)KEISTPK_;_SYVSEFKNNDDGGLK(bi)K(bi)EISTPK_;_SYVSEFK(bi)NNDDGGLKK(bi)EISTPK_
PF3D7_0730900	P. falciparum	EMP1-trafficking protein										22.5999	22.623	22.2055	22.5658	22.4811	22.4474	2 Biotin (K)	0	2			35436000	1.86e-11	141.79	104.43	13	3	2	2914.35	36.249	SYVSEFKSNSDGGINKEIYTPK	222	1	142.23	127.143	+	NaN	NaN	NaN		482	503	_SYVSEFK(bi)SNSDGGINKEIYTPK_;_SYVSEFK(bi)SNSDGGINKEIYTPK_;_SYVSEFKSNSDGGINK(bi)EIYTPK_;_SYVSEFK(bi)SNSDGGINKEIYTPK_;_SYVSEFKSNSDGGINK(bi)EIYTPK_;_SYVSEFK(bi)SNSDGGINKEIYTPK_;_SYVSEFKSNSDGGINK(bi)EIYTPK_;_SYVSEFK(bi)SNSDGGINKEIYTPK_;_SYVSEFK(bi)SNSDGGINKEIYTPK_;_SYVSEFK(bi)SNSDGGINKEIYTPK_;_SYVSEFK(bi)SNSDGGINKEIYTPK_;_SYVSEFK(bi)SNSDGGINKEIYTPK_;_SYVSEFK(bi)SNSDGGINKEIYTPK_;_SYVSEFK(bi)SNSDGGINKE…	SYVSEFK(1)SNSDGGINKEIYTPK;SYVSEFK(1)SNSDGGINKEIYTPK;SYVSEFKSNSDGGINK(1)EIYTPK;SYVSEFK(1)SNSDGGINKEIYTPK;SYVSEFKSNSDGGINK(1)EIYTPK;SYVSEFK(1)SNSDGGINKEIYTPK;SYVSEFKSNSDGGINK(1)EIYTPK;SYVSEFK(1)SNSDGGINKEIYTPK;SYVSEFK(1)SNSDGGINKEIYTPK;SYVSEFK(1)SNSDGGINKEIYTPK;SYVSEFK(1)SNSDGGINKEIYTPK;SYVSEFK(1)SNSDGGINKEIYTPK;SYVSEFK(1)SNSDGGINKEIYTPK;SYVSEFK(1)SNSDGGINKEIYTPK;SYVSEFK(1)SNSDGGINKEIYTPK;SYVSEFK(1…	SYVSEFK(79.89)SNSDGGINK(-79.89)EIYTPK(-105.08);SYVSEFK(84)SNSDGGINK(-84)EIYTPK(-114.75);SYVSEFK(-85.46)SNSDGGINK(33.77)EIYTPK(-33.77);SYVSEFK(34.96)SNSDGGINK(-34.96)EIYTPK(-79.93);SYVSEFK(-65.23)SNSDGGINK(53.64)EIYTPK(-53.64);SYVSEFK(85.39)SNSDGGINK(-85.39)EIYTPK(-115.87);SYVSEFK(-54.89)SNSDGGINK(35.16)EIYTPK(-35.16);SYVSEFK(69.3)SNSDGGINK(-69.3)EIYTPK(-98.43);SYVSEFK(57.42)SNSDGGINK(-57.42)EIYTP…			_SYVSEFK(bi)SNSDGGINKEIYTPK_;_SYVSEFKSNSDGGINK(bi)EIYTPK_;_SYVSEFK(bi)SNSDGGINK(bi)EIYTPK_
PF3D7_0730900	P. falciparum	EMP1-trafficking protein												22.455	22.7459	22.5038	22.7456	2 Biotin (K)	0	2			25763000	3.31e-18	165.9	117.53	6	3	2	2968.33	36.596	SYVSEFKSNYDGGINKESYTTK	222	1	135.23	126.233	+	NaN	NaN	NaN		460	481	_SYVSEFKSNYDGGINK(bi)ESYTTK_;_SYVSEFKSNYDGGINK(bi)ESYTTK_;_SYVSEFKSNYDGGINK(bi)ESYTTK_;_SYVSEFKSNYDGGINK(bi)ESYTTK_;_SYVSEFK(bi)SNYDGGINKESYTTK_;_SYVSEFKSNYDGGINK(bi)ESYTTK_;_SYVSEFK(bi)SNYDGGINKESYTTK_;_SYVSEFK(bi)SNYDGGINKESYTTK_;_SYVSEFK(bi)SNYDGGINKESYTTK_;_SYVSEFK(bi)SNYDGGINKESYTTK_;_SYVSEFK(bi)SNYDGGINKESYTTK_;_SYVSEFK(bi)SNYDGGINKESYTTK_;_SYVSEFK(bi)SNYDGGINKESYTTK_;_SYVSEFK(bi)SNYDGGINKE…	SYVSEFKSNYDGGINK(1)ESYTTK;SYVSEFKSNYDGGINK(1)ESYTTK;SYVSEFKSNYDGGINK(1)ESYTTK;SYVSEFKSNYDGGINK(0.999)ESYTTK(0.001);SYVSEFK(1)SNYDGGINKESYTTK;SYVSEFKSNYDGGINK(1)ESYTTK;SYVSEFK(1)SNYDGGINKESYTTK;SYVSEFK(1)SNYDGGINKESYTTK;SYVSEFK(1)SNYDGGINKESYTTK;SYVSEFK(1)SNYDGGINKESYTTK;SYVSEFK(1)SNYDGGINKESYTTK;SYVSEFK(1)SNYDGGINKESYTTK;SYVSEFK(1)SNYDGGINKESYTTK;SYVSEFK(1)SNYDGGINK(0.986)ESYTTK(0.014);SYVSEFK(1)…	SYVSEFK(-68.3)SNYDGGINK(49.79)ESYTTK(-49.79);SYVSEFK(-87.54)SNYDGGINK(59.28)ESYTTK(-59.28);SYVSEFK(-57.29)SNYDGGINK(40.25)ESYTTK(-40.25);SYVSEFK(-34.64)SNYDGGINK(29.84)ESYTTK(-29.84);SYVSEFK(68.29)SNYDGGINK(-68.29)ESYTTK(-87.05);SYVSEFK(-50.95)SNYDGGINK(43.1)ESYTTK(-43.1);SYVSEFK(75.82)SNYDGGINK(-75.82)ESYTTK(-86.05);SYVSEFK(115.46)SNYDGGINK(-115.46)ESYTTK(-146.59);SYVSEFK(105.07)SNYDGGINK(-105.0…			_SYVSEFKSNYDGGINK(bi)ESYTTK_;_SYVSEFK(bi)SNYDGGINKESYTTK_;_SYVSEFK(bi)SNYDGGINK(bi)ESYTTK_
PF3D7_0730900	P. falciparum	EMP1-trafficking protein										23.2467	23.5285	23.0872	23.1028	23.4298	23.0262	2 Biotin (K)	0	2			59793000	2.69e-08	127.53	99.236	16	3	3	3808.73	38.791	SYVSEFKSNYDGGINKESYTTKSYVSEFK	222	NaN	NaN	NaN		NaN	NaN	NaN		460	488	_SYVSEFK(bi)SNYDGGINKESYTTK(bi)SYVSEFK_;_SYVSEFK(bi)SNYDGGINKESYTTK(bi)SYVSEFK_;_SYVSEFK(bi)SNYDGGINKESYTTK(bi)SYVSEFK_;_SYVSEFK(bi)SNYDGGINKESYTTK(bi)SYVSEFK_;_SYVSEFK(bi)SNYDGGINKESYTTK(bi)SYVSEFK_;_SYVSEFK(bi)SNYDGGINKESYTTK(bi)SYVSEFK_	SYVSEFK(1)SNYDGGINKESYTTK(0.996)SYVSEFK(0.004);SYVSEFK(1)SNYDGGINK(0.002)ESYTTK(0.996)SYVSEFK(0.001);SYVSEFK(0.999)SNYDGGINK(0.001)ESYTTK(1)SYVSEFK;SYVSEFK(1)SNYDGGINK(0.01)ESYTTK(0.99)SYVSEFK;SYVSEFK(1)SNYDGGINK(0.001)ESYTTK(0.999)SYVSEFK;SYVSEFK(0.999)SNYDGGINK(0.022)ESYTTK(0.971)SYVSEFK(0.008)	SYVSEFK(46.38)SNYDGGINK(-35.13)ESYTTK(23.82)SYVSEFK(-23.82);SYVSEFK(38.1)SNYDGGINK(-26.55)ESYTTK(26.55)SYVSEFK(-28.58);SYVSEFK(32.8)SNYDGGINK(-32.8)ESYTTK(35.17)SYVSEFK(-35.17);SYVSEFK(38.16)SNYDGGINK(-20.13)ESYTTK(20.13)SYVSEFK(-40.63);SYVSEFK(38.83)SNYDGGINK(-29.83)ESYTTK(29.83)SYVSEFK(-41.91);SYVSEFK(32.05)SNYDGGINK(-16.55)ESYTTK(16.55)SYVSEFK(-21.11)			_SYVSEFK(bi)SNYDGGINKESYTTK(bi)SYVSEFK_
PF3D7_0730900	P. falciparum	EMP1-trafficking protein										21.655		21.5524	21.2536	21.3022	20.8108	2 Biotin (K)	0	2			13303000	0.00011728	113.51	71.985	6	3	2	3018.38	37.029	SYVSEFKYNDDGGINKEIYTPK	222	1	113.51	97.1908	+	NaN	NaN	NaN		570	591	_SYVSEFKYNDDGGINK(bi)EIYTPK_;_SYVSEFK(bi)YNDDGGINKEIYTPK_;_SYVSEFKYNDDGGINK(bi)EIYTPK_;_SYVSEFK(bi)YNDDGGINKEIYTPK_;_SYVSEFKYNDDGGINK(bi)EIYTPK_;_SYVSEFK(bi)YNDDGGINKEIYTPK_;_SYVSEFKYNDDGGINK(bi)EIYTPK_;_SYVSEFK(bi)YNDDGGINKEIYTPK_;_SYVSEFKYNDDGGINK(bi)EIYTPK_;_SYVSEFK(bi)YNDDGGINKEIYTPK_;_SYVSEFKYNDDGGINK(bi)EIYTPK_;_SYVSEFK(bi)YNDDGGINKEIYTPK_;_SYVSEFKYNDDGGINK(bi)EIYTPK_;_SYVSEFK(bi)YNDDGGINKE…	SYVSEFKYNDDGGINK(1)EIYTPK;SYVSEFK(1)YNDDGGINKEIYTPK;SYVSEFKYNDDGGINK(1)EIYTPK;SYVSEFK(1)YNDDGGINKEIYTPK;SYVSEFKYNDDGGINK(1)EIYTPK;SYVSEFK(1)YNDDGGINKEIYTPK;SYVSEFKYNDDGGINK(0.998)EIYTPK(0.002);SYVSEFK(1)YNDDGGINKEIYTPK;SYVSEFKYNDDGGINK(0.997)EIYTPK(0.003);SYVSEFK(1)YNDDGGINKEIYTPK;SYVSEFKYNDDGGINK(1)EIYTPK;SYVSEFK(1)YNDDGGINKEIYTPK;SYVSEFKYNDDGGINK(1)EIYTPK;SYVSEFK(1)YNDDGGINKEIYTPK;SYVSEFKYNDDGG…	SYVSEFK(-55.73)YNDDGGINK(35.87)EIYTPK(-35.87);SYVSEFK(34.04)YNDDGGINK(-34.04)EIYTPK(-54.8);SYVSEFK(-52.02)YNDDGGINK(40.03)EIYTPK(-40.03);SYVSEFK(60.5)YNDDGGINK(-60.5)EIYTPK(-98.83);SYVSEFK(-79.67)YNDDGGINK(41.93)EIYTPK(-41.93);SYVSEFK(51.12)YNDDGGINK(-51.12)EIYTPK(-83.37);SYVSEFK(-83.76)YNDDGGINK(27.09)EIYTPK(-27.09);SYVSEFK(89.85)YNDDGGINK(-89.85)EIYTPK(-116.74);SYVSEFK(-64.26)YNDDGGINK(25.86)EI…			_SYVSEFKYNDDGGINK(bi)EIYTPK_;_SYVSEFK(bi)YNDDGGINKEIYTPK_;_SYVSEFK(bi)YNDDGGINK(bi)EIYTPK_
PF3D7_0730900	P. falciparum	EMP1-trafficking protein										21.061					22.2112	2 Biotin (K)	0	2			7043200	0.00014911	82.086	52.411	2	NaN	3	3884.83	41.793	SYVSEFKYNDDGGINKEIYTPKIYVSEFK	222	NaN	NaN	NaN		NaN	NaN	NaN		570	598	_SYVSEFKYNDDGGINKEIYTPK(bi)IYVSEFK_;_SYVSEFKYNDDGGINKEIYTPK(bi)IYVSEFK_;_SYVSEFKYNDDGGINKEIYTPK(bi)IYVSEFK_;_SYVSEFKYNDDGGINKEIYTPK(bi)IYVSEFK_;_SYVSEFKYNDDGGINKEIYTPK(bi)IYVSEFK_;_SYVSEFK(bi)YNDDGGINKEIYTPK(bi)IYVSEFK_;_SYVSEFKYNDDGGINK(bi)EIYTPK(bi)IYVSEFK_	SYVSEFKYNDDGGINKEIYTPK(0.999)IYVSEFK(0.001);SYVSEFKYNDDGGINKEIYTPK(1)IYVSEFK;SYVSEFKYNDDGGINKEIYTPK(1)IYVSEFK;SYVSEFKYNDDGGINKEIYTPK(0.998)IYVSEFK(0.002);SYVSEFKYNDDGGINKEIYTPK(1)IYVSEFK;SYVSEFK(0.558)YNDDGGINK(0.444)EIYTPK(0.996)IYVSEFK(0.003);SYVSEFK(0.088)YNDDGGINK(0.912)EIYTPK(0.999)IYVSEFK(0.001)	SYVSEFK(-53.14)YNDDGGINK(-38.69)EIYTPK(30.52)IYVSEFK(-30.52);SYVSEFK(-88.56)YNDDGGINK(-73.29)EIYTPK(55.78)IYVSEFK(-55.78);SYVSEFK(-65.15)YNDDGGINK(-51.16)EIYTPK(40.84)IYVSEFK(-40.84);SYVSEFK(-78.93)YNDDGGINK(-62.03)EIYTPK(27.47)IYVSEFK(-27.47);SYVSEFK(-82.12)YNDDGGINK(-62.17)EIYTPK(44.67)IYVSEFK(-44.67);SYVSEFK(1)YNDDGGINK(-1)EIYTPK(25.78)IYVSEFK(-25.78);SYVSEFK(-10.16)YNDDGGINK(10.16)EIYTPK(30.9…			_SYVSEFKYNDDGGINKEIYTPK(bi)IYVSEFK_;_SYVSEFK(bi)YNDDGGINKEIYTPK(bi)IYVSEFK_;_SYVSEFKYNDDGGINK(bi)EIYTPK(bi)IYVSEFK_
PF3D7_0202000	P. falciparum	knob-associated histidine-rich protein				23.1678	22.9773	22.5127	23.2961	23.0289	22.886							2 Biotin (K)	0	2			50292000	9.09e-71	269.53	196.73	13	3	2	2804.25	22.738	TDKTGASTNAATNKGQCAAEGATK	117	NaN	NaN	NaN		NaN	NaN	NaN		518	541	_TDK(bi)TGASTNAATNKGQCAAEGATK_;_TDK(bi)TGASTNAATNKGQCAAEGATK_;_TDKTGASTNAATNK(bi)GQCAAEGATK_;_TDK(bi)TGASTNAATNKGQCAAEGATK_;_TDK(bi)TGASTNAATNKGQCAAEGATK_;_TDKTGASTNAATNK(bi)GQCAAEGATK_;_TDK(bi)TGASTNAATNKGQCAAEGATK_;_TDKTGASTNAATNK(bi)GQCAAEGATK_;_TDK(bi)TGASTNAATNKGQCAAEGATK_;_TDKTGASTNAATNK(bi)GQCAAEGATK_;_TDKTGASTNAATNK(bi)GQCAAEGATK_;_TDK(bi)TGASTNAATNKGQCAAEGATK_;_TDKTGASTNAATNK(bi)GQCAAEGA…	TDK(1)TGASTNAATNKGQCAAEGATK;TDK(1)TGASTNAATNKGQCAAEGATK;TDKTGASTNAATNK(1)GQCAAEGATK;TDK(1)TGASTNAATNKGQCAAEGATK;TDK(1)TGASTNAATNKGQCAAEGATK;TDKTGASTNAATNK(1)GQCAAEGATK;TDK(1)TGASTNAATNKGQCAAEGATK;TDKTGASTNAATNK(1)GQCAAEGATK;TDK(1)TGASTNAATNKGQCAAEGATK;TDKTGASTNAATNK(1)GQCAAEGATK;TDK(0.001)TGASTNAATNK(0.999)GQCAAEGATK;TDK(1)TGASTNAATNKGQCAAEGATK;TDKTGASTNAATNK(1)GQCAAEGATK;TDKTGASTNAATNK(1)GQCAAEG…	TDK(148.91)TGASTNAATNK(-148.91)GQCAAEGATK(-180.7);TDK(48.37)TGASTNAATNK(-48.37)GQCAAEGATK(-55.16);TDK(-171.1)TGASTNAATNK(114.85)GQCAAEGATK(-114.85);TDK(145.73)TGASTNAATNK(-145.73)GQCAAEGATK(-180.03);TDK(34.52)TGASTNAATNK(-34.52)GQCAAEGATK(-45.9);TDK(-158.78)TGASTNAATNK(102.87)GQCAAEGATK(-102.87);TDK(175.1)TGASTNAATNK(-175.1)GQCAAEGATK(-189.63);TDK(-141.71)TGASTNAATNK(89.9)GQCAAEGATK(-89.9);TDK(14…			_TDK(bi)TGASTNAATNKGQCAAEGATK_;_TDKTGASTNAATNK(bi)GQCAAEGATK_;_TDK(bi)TGASTNAATNK(bi)GQCAAEGATK_
PF3D7_0202000	P. falciparum	knob-associated histidine-rich protein				23.4425	22.9902	22.6054	22.6337	23.3239	22.7888							2 Biotin (K)	0	2			50328000	3.98e-16	145.43	102.72	30	NaN	3	3161.45	20.363	TDKTGASTNAATNKGQCAAEGATKGATK	117	NaN	NaN	NaN		NaN	NaN	NaN		518	545	_TDKTGASTNAATNKGQCAAEGATK(bi)GATK_;_TDKTGASTNAATNKGQCAAEGATK(bi)GATK_;_TDK(bi)TGASTNAATNKGQCAAEGATKGATK_;_TDKTGASTNAATNK(bi)GQCAAEGATKGATK_;_TDKTGASTNAATNKGQCAAEGATK(bi)GATK_;_TDKTGASTNAATNKGQCAAEGATK(bi)GATK_;_TDK(bi)TGASTNAATNKGQCAAEGATKGATK_;_TDKTGASTNAATNK(bi)GQCAAEGATKGATK_;_TDKTGASTNAATNKGQCAAEGATK(bi)GATK_;_TDKTGASTNAATNKGQCAAEGATK(bi)GATK_;_TDK(bi)TGASTNAATNKGQCAAEGATKGATK_;_TDKTGASTNAATN…	TDKTGASTNAATNKGQCAAEGATK(0.997)GATK(0.003);TDKTGASTNAATNKGQCAAEGATK(0.98)GATK(0.02);TDK(1)TGASTNAATNKGQCAAEGATKGATK;TDK(0.009)TGASTNAATNK(0.972)GQCAAEGATK(0.018)GATK(0.002);TDKTGASTNAATNKGQCAAEGATK(0.993)GATK(0.007);TDKTGASTNAATNKGQCAAEGATK(0.896)GATK(0.104);TDK(1)TGASTNAATNKGQCAAEGATKGATK;TDKTGASTNAATNK(1)GQCAAEGATKGATK;TDKTGASTNAATNKGQCAAEGATK(0.991)GATK(0.009);TDKTGASTNAATNKGQCAAEGATK(0.602)GA…	TDK(-109.27)TGASTNAATNK(-90.56)GQCAAEGATK(24.74)GATK(-24.74);TDK(-136.48)TGASTNAATNK(-55.26)GQCAAEGATK(16.99)GATK(-16.99);TDK(45.35)TGASTNAATNK(-45.35)GQCAAEGATK(-72.19)GATK(-77.42);TDK(-20.44)TGASTNAATNK(17.32)GQCAAEGATK(-17.32)GATK(-27.81);TDK(-139.54)TGASTNAATNK(-58.07)GQCAAEGATK(21.26)GATK(-21.26);TDK(-144.29)TGASTNAATNK(-115.8)GQCAAEGATK(9.37)GATK(-9.37);TDK(56.61)TGASTNAATNK(-56.61)GQCAAEGA…			_TDKTGASTNAATNKGQCAAEGATK(bi)GATK_;_TDK(bi)TGASTNAATNKGQCAAEGATKGATK_;_TDKTGASTNAATNK(bi)GQCAAEGATKGATK_;_TDKTGASTNAATNKGQCAAEGATKGATK(bi)_;_TDK(bi)TGASTNAATNKGQCAAEGATK(bi)GATK_;_TDKTGASTNAATNK(bi)GQCAAEGATK(bi)GATK_;_TDK(bi)TGASTNAATNK(bi)GQCAAEGATKGATK_;_TDK(bi)TGASTNAATNK(bi)GQCAAEGATK(bi)GATK_
PF3D7_0202000	P. falciparum	knob-associated histidine-rich protein				24.5926	24.2463	24.0935	24.7338	24.4105	24.2821							2 Biotin (K)	0	2			133860000	6.84e-62	256.88	216.19	17	3	2	2817.28	23.045	TGASTNAATNKGQCAAEGATKGATK	117	NaN	NaN	NaN		NaN	NaN	NaN		521	545	_TGASTNAATNKGQCAAEGATK(bi)GATK_;_TGASTNAATNKGQCAAEGATK(bi)GATK_;_TGASTNAATNK(bi)GQCAAEGATKGATK_;_TGASTNAATNKGQCAAEGATK(bi)GATK_;_TGASTNAATNKGQCAAEGATK(bi)GATK_;_TGASTNAATNK(bi)GQCAAEGATKGATK_;_TGASTNAATNKGQCAAEGATK(bi)GATK_;_TGASTNAATNKGQCAAEGATK(bi)GATK_;_TGASTNAATNKGQCAAEGATK(bi)GATK_;_TGASTNAATNKGQCAAEGATK(bi)GATK_;_TGASTNAATNK(bi)GQCAAEGATKGATK_;_TGASTNAATNKGQCAAEGATK(bi)GATK_;_TGASTNAATNKGQC…	TGASTNAATNKGQCAAEGATK(0.959)GATK(0.041);TGASTNAATNKGQCAAEGATK(0.994)GATK(0.006);TGASTNAATNK(1)GQCAAEGATKGATK;TGASTNAATNKGQCAAEGATK(0.888)GATK(0.112);TGASTNAATNKGQCAAEGATK(0.868)GATK(0.132);TGASTNAATNK(1)GQCAAEGATKGATK;TGASTNAATNKGQCAAEGATK(0.955)GATK(0.045);TGASTNAATNKGQCAAEGATK(0.86)GATK(0.14);TGASTNAATNKGQCAAEGATK(0.969)GATK(0.031);TGASTNAATNKGQCAAEGATK(0.708)GATK(0.292);TGASTNAATNK(1)GQCAAEGAT…	TGASTNAATNK(-103.57)GQCAAEGATK(13.65)GATK(-13.65);TGASTNAATNK(-126.16)GQCAAEGATK(22)GATK(-22);TGASTNAATNK(88.41)GQCAAEGATK(-88.41)GATK(-99.67);TGASTNAATNK(-99.69)GQCAAEGATK(9)GATK(-9);TGASTNAATNK(-46.35)GQCAAEGATK(8.19)GATK(-8.19);TGASTNAATNK(132.5)GQCAAEGATK(-132.5)GATK(-142.62);TGASTNAATNK(-42.1)GQCAAEGATK(13.25)GATK(-13.25);TGASTNAATNK(-106.49)GQCAAEGATK(7.87)GATK(-7.87);TGASTNAATNK(-73.22)GQC…			_TGASTNAATNKGQCAAEGATK(bi)GATK_;_TGASTNAATNK(bi)GQCAAEGATKGATK_;_TGASTNAATNKGQCAAEGATKGATK(bi)_;_TGASTNAATNK(bi)GQCAAEGATK(bi)GATK_
PF3D7_0202000	P. falciparum	knob-associated histidine-rich protein				22.8032	22.8168	22.3945	23.391	22.9672	22.3396							2 Biotin (K)	0	2			44724000	1.34e-54	195.58	153.55	26	NaN	3	3420.57	20.211	TGASTNAATNKGQCAAEGATKGATKEASTSK	117	NaN	NaN	NaN		NaN	NaN	NaN		521	551	_TGASTNAATNKGQCAAEGATK(bi)GATKEASTSK_;_TGASTNAATNKGQCAAEGATK(bi)GATKEASTSK_;_TGASTNAATNKGQCAAEGATKGATK(bi)EASTSK_;_TGASTNAATNKGQCAAEGATK(bi)GATKEASTSK_;_TGASTNAATNKGQCAAEGATK(bi)GATKEASTSK_;_TGASTNAATNKGQCAAEGATKGATK(bi)EASTSK_;_TGASTNAATNKGQCAAEGATK(bi)GATKEASTSK_;_TGASTNAATNKGQCAAEGATKGATK(bi)EASTSK_;_TGASTNAATNKGQCAAEGATK(bi)GATKEASTSK_;_TGASTNAATNKGQCAAEGATK(bi)GATKEASTSK_;_TGASTNAATNKGQCAAEG…	TGASTNAATNK(0.073)GQCAAEGATK(0.6)GATK(0.323)EASTSK(0.005);TGASTNAATNKGQCAAEGATK(0.498)GATK(0.498)EASTSK(0.004);TGASTNAATNKGQCAAEGATK(0.025)GATK(0.973)EASTSK(0.003);TGASTNAATNKGQCAAEGATK(0.828)GATK(0.171)EASTSK;TGASTNAATNKGQCAAEGATK(0.737)GATK(0.262)EASTSK(0.001);TGASTNAATNKGQCAAEGATK(0.162)GATK(0.833)EASTSK(0.005);TGASTNAATNKGQCAAEGATK(0.925)GATK(0.075)EASTSK;TGASTNAATNKGQCAAEGATK(0.051)GATK(0.93…	TGASTNAATNK(-9.17)GQCAAEGATK(2.69)GATK(-2.69)EASTSK(-21.05);TGASTNAATNK(-68.91)GQCAAEGATK(0)GATK(0)EASTSK(-21.22);TGASTNAATNK(-47.01)GQCAAEGATK(-15.97)GATK(15.97)EASTSK(-25.4);TGASTNAATNK(-76.72)GQCAAEGATK(6.84)GATK(-6.84)EASTSK(-33.65);TGASTNAATNK(-63.47)GQCAAEGATK(4.49)GATK(-4.49)EASTSK(-27.65);TGASTNAATNK(-40.26)GQCAAEGATK(-7.11)GATK(7.11)EASTSK(-22.21);TGASTNAATNK(-51.74)GQCAAEGATK(10.91)GATK…			_TGASTNAATNKGQCAAEGATK(bi)GATKEASTSK_;_TGASTNAATNKGQCAAEGATKGATK(bi)EASTSK_;_TGASTNAATNKGQCAAEGATK(bi)GATK(bi)EASTSK_;_TGASTNAATNK(bi)GQCAAEGATK(bi)GATK(bi)EASTSK_
PF3D7_0702500	P. falciparum	Plasmodium exported protein, unknown function				25.4457	25.2426	24.9847	28.4746	27.9089	26.9977	25.7821	26.5195	25.8717	26.7895	26.8142	26.9977	2 Biotin (K)	0	2			1460100000	1.04e-09	209.6	127.7	58	NaN	2	2008.99	31.946	TKAHGLFEEIEKR	202	1	137.27	137.271	+	NaN	NaN	NaN		91	103	_TK(bi)AHGLFEEIEKR_;_TK(bi)AHGLFEEIEKR_;_TK(bi)AHGLFEEIEKR_;_TK(bi)AHGLFEEIEKR_;_TK(bi)AHGLFEEIEKR_;_TK(bi)AHGLFEEIEKR_;_TK(bi)AHGLFEEIEKR_;_TK(bi)AHGLFEEIEKR_;_TK(bi)AHGLFEEIEKR_;_TK(bi)AHGLFEEIEKR_;_TK(bi)AHGLFEEIEKR_;_TK(bi)AHGLFEEIEKR_;_TK(bi)AHGLFEEIEKR_;_TK(bi)AHGLFEEIEKR_;_TK(bi)AHGLFEEIEKR_;_TK(bi)AHGLFEEIEKR_;_TK(bi)AHGLFEEIEKR_;_TK(bi)AHGLFEEIEKR_;_TK(bi)AHGLFEEIEKR_;_TK(bi)AHGLFEEIEKR_…	TK(1)AHGLFEEIEKR;TK(1)AHGLFEEIEKR;TK(1)AHGLFEEIEKR;TK(1)AHGLFEEIEKR;TK(1)AHGLFEEIEKR;TK(1)AHGLFEEIEKR;TK(1)AHGLFEEIEKR;TK(1)AHGLFEEIEKR;TK(1)AHGLFEEIEKR;TK(1)AHGLFEEIEKR;TK(1)AHGLFEEIEKR;TK(1)AHGLFEEIEKR;TK(1)AHGLFEEIEKR;TK(1)AHGLFEEIEKR;TK(1)AHGLFEEIEKR;TK(1)AHGLFEEIEKR;TK(1)AHGLFEEIEKR;TK(1)AHGLFEEIEKR;TK(1)AHGLFEEIEKR;TK(1)AHGLFEEIEKR;TK(1)AHGLFEEIEKR;TK(1)AHGLFEEIEKR;TK(1)AHGLFEEIEKR;TK(0.998…	TK(114.63)AHGLFEEIEK(-114.63)R;TK(227.49)AHGLFEEIEK(-227.49)R;TK(128.24)AHGLFEEIEK(-128.24)R;TK(62.41)AHGLFEEIEK(-62.41)R;TK(147.75)AHGLFEEIEK(-147.75)R;TK(176.23)AHGLFEEIEK(-176.23)R;TK(95.26)AHGLFEEIEK(-95.26)R;TK(99.22)AHGLFEEIEK(-99.22)R;TK(59.28)AHGLFEEIEK(-59.28)R;TK(149.97)AHGLFEEIEK(-149.97)R;TK(102.7)AHGLFEEIEK(-102.7)R;TK(224.13)AHGLFEEIEK(-224.13)R;TK(141.23)AHGLFEEIEK(-141.23)R;TK(172…			_TK(bi)AHGLFEEIEKR_;_TK(bi)AHGLFEEIEK(bi)R_
PF3D7_0401800	P. falciparum	Plasmodium exported protein (PHISTb), unknown function				22.7878	21.6508		21.515	22.7275	21.7956							2 Biotin (K)	0	2			24116000	0.00039801	163.45	108.09	10	NaN	2	1787.82	28.76	TKDPNMFNKNK	145	0.999994	178.62	78.7369	+	NaN	NaN	NaN		389	399	_TKDPNM(ox)FNK(bi)NK_;_TKDPNM(ox)FNK(bi)NK_;_TKDPNM(ox)FNK(bi)NK_;_TKDPNM(ox)FNK(bi)NK_;_TKDPNM(ox)FNK(bi)NK_;_TKDPNM(ox)FNK(bi)NK_;_TKDPNM(ox)FNK(bi)NK_;_TK(bi)DPNMFNKNK_;_TKDPNMFNK(bi)NK_;_TKDPNMFNK(bi)NK_;_TKDPNMFNK(bi)NK_;_TK(bi)DPNMFNKNK_;_TKDPNMFNKNK(bi)_;_TKDPNMFNK(bi)NK_;_TK(bi)DPNMFNKNK_;_TKDPNMFNK(bi)NK_;_TKDPNMFNK(bi)NK_;_TK(bi)DPNMFNKNK_;_TKDPNMFNKNK(bi)_;_TKDPNMFNK(bi)NK_;_TK(bi)DPNM…	TKDPNMFNK(0.906)NK(0.094);TKDPNMFNK(0.964)NK(0.036);TKDPNMFNK(0.993)NK(0.007);TKDPNMFNK(0.871)NK(0.129);TKDPNMFNK(0.998)NK(0.002);TK(1)DPNMFNKNK;TKDPNMFNK(0.775)NK(0.225);TKDPNMFNK(0.945)NK(0.055);TKDPNMFNK(1)NK;TK(1)DPNMFNKNK;TKDPNMFNK(0.397)NK(0.603);TKDPNMFNK(0.994)NK(0.006);TK(1)DPNMFNKNK;TKDPNMFNK(0.999)NK(0.001);TKDPNMFNK(0.978)NK(0.022);TK(1)DPNMFNKNK;TKDPNMFNK(0.42)NK(0.58);TKDPNMFNK(1)NK…	TK(-76.76)DPNMFNK(9.82)NK(-9.82);TK(-69.93)DPNMFNK(14.33)NK(-14.33);TK(-94.13)DPNMFNK(21.62)NK(-21.62);TK(-43.22)DPNMFNK(8.3)NK(-8.3);TK(-91.82)DPNMFNK(27)NK(-27);TK(66.84)DPNMFNK(-66.84)NK(-71.13);TK(-116.1)DPNMFNK(5.37)NK(-5.37);TK(-120.06)DPNMFNK(12.39)NK(-12.39);TK(-110.39)DPNMFNK(42.44)NK(-42.44);TK(83.06)DPNMFNK(-83.06)NK(-86.9);TK(-84.87)DPNMFNK(-1.82)NK(1.82);TK(-126.31)DPNMFNK(22.26)NK(-…			_TKDPNM(ox)FNK(bi)NK_;_TK(bi)DPNMFNKNK_;_TKDPNMFNK(bi)NK_;_TKDPNMFNKNK(bi)_;_TK(bi)DPNMFNK(bi)NK_
PF3D7_1478600	P. falciparum	EMP1-trafficking protein					21.0097		22.741	22.2893	21.2169							2 Biotin (K)	0	2			16684000	0.0018796	119.45	64.185	3	3	2	1838.97	30.052	TKIVNLKNSGVSK	468	1	97.45	92.2384	+	NaN	NaN	NaN		256	268	_TKIVNLK(bi)NSGVSK_;_TKIVNLK(bi)NSGVSK_;_TKIVNLK(bi)NSGVSK_;_TKIVNLK(bi)NSGVSK_;_TK(bi)IVNLK(bi)NSGVSK_;_TK(bi)IVNLK(bi)NSGVSK_;_TK(bi)IVNLK(bi)NSGVSK_;_TK(bi)IVNLK(bi)NSGVSK_	TKIVNLK(1)NSGVSK;TK(1)IVNLK(1)NSGVSK;TK(1)IVNLK(0.999)NSGVSK(0.001);TK(1)IVNLK(0.999)NSGVSK(0.001)	TK(-48.17)IVNLK(33.42)NSGVSK(-33.42);TK(105.93)IVNLK(40.83)NSGVSK(-40.83);TK(102.15)IVNLK(29.89)NSGVSK(-29.89);TK(92.24)IVNLK(30.22)NSGVSK(-30.22)			_TKIVNLK(bi)NSGVSK_;_TK(bi)IVNLK(bi)NSGVSK_
PF3D7_0401800	P. falciparum	Plasmodium exported protein (PHISTb), unknown function				22.5492	21.9824	22.4798	22.4278	22.5545	22.4866							2 Biotin (K)	0	2			33809000	1.96e-12	236.11	148.01	11	NaN	2	1619.81	29.033	TKTFSKELSK	145	1	158.3	110.674	+	NaN	NaN	NaN		373	382	_TK(bi)TFSK(bi)ELSK_;_TK(bi)TFSK(bi)ELSK_;_TK(bi)TFSK(bi)ELSK_;_TK(bi)TFSK(bi)ELSK_;_TK(bi)TFSK(bi)ELSK_;_TK(bi)TFSK(bi)ELSK_;_TK(bi)TFSK(bi)ELSK_;_TK(bi)TFSK(bi)ELSK_;_TK(bi)TFSK(bi)ELSK_;_TKTFSK(bi)ELSK_;_TK(bi)TFSKELSK_;_TK(bi)TFSKELSK_;_TK(bi)TFSKELSK_;_TK(bi)TFSKELSK_	TK(1)TFSK(1)ELSK;TK(1)TFSK(1)ELSK;TK(1)TFSK(1)ELSK;TK(1)TFSK(1)ELSK;TK(1)TFSK(1)ELSK;TK(1)TFSK(1)ELSK;TK(1)TFSK(1)ELSK;TK(1)TFSK(1)ELSK;TK(0.06)TFSK(0.94)ELSK;TK(1)TFSKELSK;TK(0.999)TFSK(0.001)ELSK;TK(0.999)TFSK(0.001)ELSK	TK(196.65)TFSK(97.99)ELSK(-97.99);TK(115.08)TFSK(33.02)ELSK(-33.02);TK(142.1)TFSK(54.56)ELSK(-54.56);TK(211.86)TFSK(111.69)ELSK(-111.69);TK(121.61)TFSK(55.84)ELSK(-55.84);TK(147.07)TFSK(69.93)ELSK(-69.93);TK(180.41)TFSK(98.79)ELSK(-98.79);TK(140.11)TFSK(81.24)ELSK(-81.24);TK(-11.93)TFSK(11.93)ELSK(-44.52);TK(34.25)TFSK(-34.25)ELSK(-85.85);TK(28.81)TFSK(-28.81)ELSK(-97.93);TK(29.65)TFSK(-29.65)ELS…			_TK(bi)TFSK(bi)ELSK_;_TKTFSK(bi)ELSK_;_TK(bi)TFSKELSK_
PF3D7_0730900	P. falciparum	EMP1-trafficking protein										23.1329	23.654	22.8697	23.2678	22.9762	23.5869	2 Biotin (K)	0	2			61106000	1.31e-11	176.19	124.47	19	NaN	2	2217.06	15.136	TLGKHEHHEDHLKGK	222	NaN	NaN	NaN		NaN	NaN	NaN		1906	1920	_TLGK(bi)HEHHEDHLKGK_;_TLGK(bi)HEHHEDHLKGK_;_TLGK(bi)HEHHEDHLKGK_;_TLGKHEHHEDHLK(bi)GK_;_TLGKHEHHEDHLK(bi)GK_;_TLGKHEHHEDHLK(bi)GK_;_TLGKHEHHEDHLK(bi)GK_;_TLGKHEHHEDHLK(bi)GK_;_TLGKHEHHEDHLK(bi)GK_;_TLGKHEHHEDHLK(bi)GK_;_TLGKHEHHEDHLK(bi)GK_;_TLGKHEHHEDHLK(bi)GK_;_TLGKHEHHEDHLK(bi)GK_;_TLGKHEHHEDHLK(bi)GK_;_TLGKHEHHEDHLK(bi)GK_;_TLGKHEHHEDHLK(bi)GK_;_TLGKHEHHEDHLK(bi)GK_;_TLGKHEHHEDHLK(bi)GK_;_TL…	TLGK(1)HEHHEDHLKGK;TLGK(1)HEHHEDHLKGK;TLGK(1)HEHHEDHLKGK;TLGKHEHHEDHLK(0.84)GK(0.16);TLGK(0.017)HEHHEDHLK(0.95)GK(0.033);TLGKHEHHEDHLK(0.851)GK(0.149);TLGKHEHHEDHLK(0.838)GK(0.162);TLGKHEHHEDHLK(0.839)GK(0.161);TLGKHEHHEDHLK(0.859)GK(0.141);TLGK(0.001)HEHHEDHLK(0.647)GK(0.352);TLGK(0.004)HEHHEDHLK(0.807)GK(0.188);TLGKHEHHEDHLK(0.835)GK(0.165);TLGKHEHHEDHLK(0.96)GK(0.04);TLGKHEHHEDHLK(0.814)GK(0.1…	TLGK(44.77)HEHHEDHLK(-44.77)GK(-48.6);TLGK(51.05)HEHHEDHLK(-51.05)GK(-55.6);TLGK(48.05)HEHHEDHLK(-48.05)GK(-52.51);TLGK(-59.65)HEHHEDHLK(7.2)GK(-7.2);TLGK(-17.42)HEHHEDHLK(14.64)GK(-14.64);TLGK(-37.38)HEHHEDHLK(7.56)GK(-7.56);TLGK(-74.04)HEHHEDHLK(7.15)GK(-7.15);TLGK(-58.82)HEHHEDHLK(7.16)GK(-7.16);TLGK(-61.25)HEHHEDHLK(7.86)GK(-7.86);TLGK(-27.08)HEHHEDHLK(2.64)GK(-2.64);TLGK(-22.59)HEHHEDHLK(6.3…			_TLGK(bi)HEHHEDHLKGK_;_TLGKHEHHEDHLK(bi)GK_;_TLGKHEHHEDHLKGK(bi)_;_TLGK(bi)HEHHEDHLK(bi)GK_
PF3D7_0730900	P. falciparum	EMP1-trafficking protein										23.244	23.7182	23.1206	22.9023	22.9874	22.7997	2 Biotin (K)	0	2			56305000	5.4e-06	114.56	80.871	16	NaN	3	2806.32	19.945	TLGKHEHHEDHLKGKFGDNR	222	1	94.188	94.188	+	NaN	NaN	NaN		1906	1925	_TLGKHEHHEDHLKGK(bi)FGDNR_;_TLGKHEHHEDHLKGK(bi)FGDNR_;_TLGKHEHHEDHLKGK(bi)FGDNR_;_TLGKHEHHEDHLKGK(bi)FGDNR_;_TLGKHEHHEDHLKGK(bi)FGDNR_;_TLGKHEHHEDHLKGK(bi)FGDNR_;_TLGKHEHHEDHLK(bi)GK(bi)FGDNR_;_TLGKHEHHEDHLK(bi)GK(bi)FGDNR_;_TLGKHEHHEDHLK(bi)GK(bi)FGDNR_;_TLGKHEHHEDHLK(bi)GK(bi)FGDNR_;_TLGKHEHHEDHLK(bi)GK(bi)FGDNR_;_TLGK(bi)HEHHEDHLKGK(bi)FGDNR_;_TLGKHEHHEDHLK(bi)GK(bi)FGDNR_;_TLGKHEHHEDHLK(bi)GK…	TLGKHEHHEDHLK(0.136)GK(0.864)FGDNR;TLGKHEHHEDHLK(0.013)GK(0.987)FGDNR;TLGKHEHHEDHLK(0.368)GK(0.632)FGDNR;TLGKHEHHEDHLK(0.347)GK(0.653)FGDNR;TLGKHEHHEDHLK(0.345)GK(0.655)FGDNR;TLGKHEHHEDHLK(1)GK(1)FGDNR;TLGKHEHHEDHLK(1)GK(1)FGDNR;TLGKHEHHEDHLK(1)GK(1)FGDNR;TLGKHEHHEDHLK(1)GK(1)FGDNR;TLGK(0.001)HEHHEDHLK(0.999)GK(1)FGDNR;TLGK(0.999)HEHHEDHLK(0.261)GK(0.74)FGDNR;TLGKHEHHEDHLK(1)GK(1)FGDNR;TLGKHEHHED…	TLGK(-43.69)HEHHEDHLK(-8.03)GK(8.03)FGDNR;TLGK(-91.71)HEHHEDHLK(-18.8)GK(18.8)FGDNR;TLGK(-58.86)HEHHEDHLK(-2.35)GK(2.35)FGDNR;TLGK(-73.28)HEHHEDHLK(-2.75)GK(2.75)FGDNR;TLGK(-53.15)HEHHEDHLK(-2.78)GK(2.78)FGDNR;TLGK(-73.26)HEHHEDHLK(73.26)GK(82.58)FGDNR;TLGK(-38.23)HEHHEDHLK(38.23)GK(45.82)FGDNR;TLGK(-47.71)HEHHEDHLK(47.71)GK(56.24)FGDNR;TLGK(-59.1)HEHHEDHLK(59.1)GK(74.13)FGDNR;TLGK(-31.26)HEHHEDH…			_TLGKHEHHEDHLKGK(bi)FGDNR_;_TLGKHEHHEDHLK(bi)GK(bi)FGDNR_;_TLGK(bi)HEHHEDHLKGK(bi)FGDNR_;_TLGK(bi)HEHHEDHLK(bi)GK(bi)FGDNR_
PF3D7_0730900	P. falciparum	EMP1-trafficking protein				20.432	20.7336	19.7729	22.1466	21.5796	21.1261	25.1214	25.6264	23.137	25.2714	25.2643	25.8069	2 Biotin (K)	0	2			251200000	4.87e-06	142.95	98.215	25	NaN	2	2243.06	17.406	TLGKHEHHEEYVKGK	222	NaN	NaN	NaN		NaN	NaN	NaN		1884	1898	_TLGKHEHHEEYVK(bi)GK_;_TLGKHEHHEEYVK(bi)GK_;_TLGKHEHHEEYVK(bi)GK_;_TLGK(bi)HEHHEEYVKGK_;_TLGKHEHHEEYVK(bi)GK_;_TLGKHEHHEEYVK(bi)GK_;_TLGKHEHHEEYVK(bi)GK_;_TLGK(bi)HEHHEEYVKGK_;_TLGKHEHHEEYVK(bi)GK_;_TLGKHEHHEEYVK(bi)GK_;_TLGKHEHHEEYVK(bi)GK_;_TLGKHEHHEEYVK(bi)GK_;_TLGKHEHHEEYVK(bi)GK_;_TLGKHEHHEEYVK(bi)GK_;_TLGKHEHHEEYVK(bi)GK_;_TLGKHEHHEEYVK(bi)GK_;_TLGKHEHHEEYVK(bi)GK_;_TLGKHEHHEEYVK(bi)GK_;_TL…	TLGKHEHHEEYVK(0.828)GK(0.172);TLGK(0.011)HEHHEEYVK(0.964)GK(0.025);TLGKHEHHEEYVK(0.839)GK(0.161);TLGK(1)HEHHEEYVKGK;TLGKHEHHEEYVK(0.975)GK(0.025);TLGKHEHHEEYVK(0.843)GK(0.157);TLGKHEHHEEYVK(0.825)GK(0.175);TLGK(0.965)HEHHEEYVK(0.031)GK(0.005);TLGKHEHHEEYVK(0.5)GK(0.5);TLGKHEHHEEYVK(0.837)GK(0.163);TLGKHEHHEEYVK(0.998)GK(0.002);TLGKHEHHEEYVK(0.843)GK(0.157);TLGKHEHHEEYVK(0.977)GK(0.023);TLGKHEHHEE…	TLGK(-106.62)HEHHEEYVK(6.82)GK(-6.82);TLGK(-19.29)HEHHEEYVK(15.89)GK(-15.89);TLGK(-92.22)HEHHEEYVK(7.17)GK(-7.17);TLGK(46.79)HEHHEEYVK(-46.79)GK(-48.19);TLGK(-88.58)HEHHEEYVK(15.99)GK(-15.99);TLGK(-99.35)HEHHEEYVK(7.29)GK(-7.29);TLGK(-107.87)HEHHEEYVK(6.73)GK(-6.73);TLGK(14.98)HEHHEEYVK(-14.98)GK(-23.22);TLGK(-116.51)HEHHEEYVK(0)GK(0);TLGK(-108.2)HEHHEEYVK(7.1)GK(-7.1);TLGK(-157.83)HEHHEEYVK(28.1…			_TLGKHEHHEEYVK(bi)GK_;_TLGK(bi)HEHHEEYVKGK_;_TLGK(bi)HEHHEEYVK(bi)GK_;_TLGK(bi)HEHHEEYVKGK(bi)_
PF3D7_0730900	P. falciparum	EMP1-trafficking protein										22.72	22.5288	23.7077	24.2317	24.2463	24.1795	2 Biotin (K)	0	2			85236000	5.44e-18	170.38	120.72	19	NaN	3	2832.32	21.759	TLGKHEHHEEYVKGKFGDNR	222	1	188.54	188.543	+	NaN	NaN	NaN		1884	1903	_TLGKHEHHEEYVK(bi)GK(bi)FGDNR_;_TLGKHEHHEEYVK(bi)GK(bi)FGDNR_;_TLGKHEHHEEYVK(bi)GK(bi)FGDNR_;_TLGKHEHHEEYVK(bi)GK(bi)FGDNR_;_TLGKHEHHEEYVK(bi)GK(bi)FGDNR_;_TLGKHEHHEEYVK(bi)GK(bi)FGDNR_;_TLGKHEHHEEYVK(bi)GK(bi)FGDNR_;_TLGKHEHHEEYVK(bi)GK(bi)FGDNR_;_TLGKHEHHEEYVK(bi)GK(bi)FGDNR_;_TLGKHEHHEEYVK(bi)GK(bi)FGDNR_;_TLGKHEHHEEYVK(bi)GK(bi)FGDNR_;_TLGK(bi)HEHHEEYVK(bi)GK(bi)FGDNR_;_TLGK(bi)HEHHEEYVK(bi)G…	TLGKHEHHEEYVK(1)GK(1)FGDNR;TLGKHEHHEEYVK(1)GK(1)FGDNR;TLGKHEHHEEYVK(1)GK(1)FGDNR;TLGK(0.001)HEHHEEYVK(0.999)GK(1)FGDNR;TLGKHEHHEEYVK(1)GK(1)FGDNR;TLGKHEHHEEYVK(1)GK(1)FGDNR;TLGKHEHHEEYVK(1)GK(1)FGDNR;TLGKHEHHEEYVK(1)GK(1)FGDNR;TLGKHEHHEEYVK(1)GK(1)FGDNR;TLGKHEHHEEYVK(1)GK(1)FGDNR;TLGKHEHHEEYVK(1)GK(1)FGDNR;TLGK(1)HEHHEEYVK(1)GK(1)FGDNR;TLGK(1)HEHHEEYVK(1)GK(1)FGDNR;TLGK(1)HEHHEEYVK(1)GK(1)FGDNR;T…	TLGK(-49.49)HEHHEEYVK(49.49)GK(75.27)FGDNR;TLGK(-112.26)HEHHEEYVK(112.26)GK(133.64)FGDNR;TLGK(-47.19)HEHHEEYVK(47.19)GK(74.81)FGDNR;TLGK(-30.76)HEHHEEYVK(30.76)GK(46.52)FGDNR;TLGK(-61.76)HEHHEEYVK(61.76)GK(106.23)FGDNR;TLGK(-41.61)HEHHEEYVK(41.61)GK(59)FGDNR;TLGK(-46.85)HEHHEEYVK(46.85)GK(79.37)FGDNR;TLGK(-37.48)HEHHEEYVK(37.48)GK(50.07)FGDNR;TLGK(-42.75)HEHHEEYVK(42.75)GK(76.05)FGDNR;TLGK(-42.84…			_TLGKHEHHEEYVK(bi)GK(bi)FGDNR_;_TLGK(bi)HEHHEEYVK(bi)GK(bi)FGDNR_;_TLGKHEHHEEYVKGK(bi)FGDNR_
PF3D7_0730900	P. falciparum	EMP1-trafficking protein				22.2332	22.476	21.8774	23.1811	23.5638	23.2125	28.7927	28.9456	28.3951	28.7518	28.4785	28.726	2 Biotin (K)	0	2			2650400000	1.12e-33	219.99	177.64	79	NaN	3	2874.37	23.302	TLGKHEHHEEYVKGKFVDNR	222	1	237.16	237.158	+	NaN	NaN	NaN		1950	1969	_TLGKHEHHEEYVK(bi)GK(bi)FVDNR_;_TLGKHEHHEEYVK(bi)GK(bi)FVDNR_;_TLGKHEHHEEYVK(bi)GK(bi)FVDNR_;_TLGKHEHHEEYVK(bi)GK(bi)FVDNR_;_TLGKHEHHEEYVK(bi)GK(bi)FVDNR_;_TLGKHEHHEEYVK(bi)GK(bi)FVDNR_;_TLGKHEHHEEYVK(bi)GK(bi)FVDNR_;_TLGKHEHHEEYVK(bi)GK(bi)FVDNR_;_TLGKHEHHEEYVK(bi)GK(bi)FVDNR_;_TLGKHEHHEEYVK(bi)GK(bi)FVDNR_;_TLGKHEHHEEYVK(bi)GK(bi)FVDNR_;_TLGKHEHHEEYVK(bi)GK(bi)FVDNR_;_TLGKHEHHEEYVK(bi)GK(bi)FVD…	TLGKHEHHEEYVK(1)GK(1)FVDNR;TLGKHEHHEEYVK(1)GK(1)FVDNR;TLGKHEHHEEYVK(1)GK(1)FVDNR;TLGKHEHHEEYVK(1)GK(1)FVDNR;TLGKHEHHEEYVK(1)GK(1)FVDNR;TLGKHEHHEEYVK(1)GK(1)FVDNR;TLGKHEHHEEYVK(1)GK(1)FVDNR;TLGKHEHHEEYVK(1)GK(1)FVDNR;TLGKHEHHEEYVK(1)GK(1)FVDNR;TLGKHEHHEEYVK(1)GK(1)FVDNR;TLGKHEHHEEYVK(1)GK(1)FVDNR;TLGKHEHHEEYVK(1)GK(1)FVDNR;TLGKHEHHEEYVK(1)GK(1)FVDNR;TLGKHEHHEEYVK(1)GK(1)FVDNR;TLGKHEHHEEYVK(1)GK(1)…	TLGK(-48.02)HEHHEEYVK(48.02)GK(77.85)FVDNR;TLGK(-54.96)HEHHEEYVK(54.96)GK(78)FVDNR;TLGK(-40.47)HEHHEEYVK(40.47)GK(62.47)FVDNR;TLGK(-57.51)HEHHEEYVK(57.51)GK(86.19)FVDNR;TLGK(-60.67)HEHHEEYVK(60.67)GK(83.32)FVDNR;TLGK(-57.27)HEHHEEYVK(57.27)GK(74.84)FVDNR;TLGK(-60.05)HEHHEEYVK(60.05)GK(84.74)FVDNR;TLGK(-78.71)HEHHEEYVK(78.71)GK(107.47)FVDNR;TLGK(-65.98)HEHHEEYVK(65.98)GK(85.34)FVDNR;TLGK(-118.08)H…			_TLGKHEHHEEYVK(bi)GK(bi)FVDNR_;_TLGKHEHHEEYVKGK(bi)FVDNR_;_TLGK(bi)HEHHEEYVK(bi)GK(bi)FVDNR_
PF3D7_0730900	P. falciparum	EMP1-trafficking protein										24.6865	24.5926	24.0443	24.3778	24.1095	24.4488	2 Biotin (K)	0	2			132540000	0.0049208	106.58	72.911	9	NaN	2	2030.99	16.025	TLGKHKHHEDHLK	222	1	106.58	83.8261	+	NaN	NaN	NaN		1972	1984	_TLGK(bi)HKHHEDHLK_;_TLGK(bi)HKHHEDHLK_;_TLGK(bi)HKHHEDHLK_;_TLGK(bi)HKHHEDHLK_;_TLGK(bi)HKHHEDHLK_;_TLGK(bi)HKHHEDHLK_;_TLGK(bi)HKHHEDHLK_;_TLGK(bi)HKHHEDHLK_;_TLGK(bi)HKHHEDHLK_;_TLGK(bi)HKHHEDHLK_;_TLGK(bi)HKHHEDHLK_;_TLGK(bi)HKHHEDHLK_;_TLGK(bi)HKHHEDHLK_;_TLGK(bi)HKHHEDHLK_;_TLGK(bi)HKHHEDHLK_;_TLGK(bi)HKHHEDHLK_;_TLGK(bi)HK(bi)HHEDHLK_;_TLGK(bi)HK(bi)HHEDHLK_;_TLGK(bi)HK(bi)HHEDHLK_;_TLGK(b…	TLGK(0.853)HK(0.147)HHEDHLK;TLGK(0.985)HK(0.015)HHEDHLK;TLGK(0.783)HK(0.217)HHEDHLK;TLGK(0.997)HK(0.003)HHEDHLK;TLGK(0.857)HK(0.143)HHEDHLK;TLGK(0.998)HK(0.002)HHEDHLK;TLGK(0.977)HK(0.023)HHEDHLK;TLGK(0.822)HK(0.178)HHEDHLK;TLGK(0.765)HK(0.235)HHEDHLK;TLGK(0.952)HK(0.048)HHEDHLK;TLGK(0.5)HK(0.5)HHEDHLK;TLGK(1)HK(1)HHEDHLK;TLGK(1)HK(1)HHEDHLK;TLGK(1)HK(1)HHEDHLK;TLGK(1)HK(1)HHEDHLK;TLGK(1)HK(1)HHE…	TLGK(7.63)HK(-7.63)HHEDHLK(-107.55);TLGK(18.07)HK(-18.07)HHEDHLK(-82.87);TLGK(5.57)HK(-5.57)HHEDHLK(-52.75);TLGK(25.08)HK(-25.08)HHEDHLK(-105.4);TLGK(7.78)HK(-7.78)HHEDHLK(-66.46);TLGK(26.69)HK(-26.69)HHEDHLK(-93.14);TLGK(16.26)HK(-16.26)HHEDHLK(-65.7);TLGK(6.65)HK(-6.65)HHEDHLK(-52.96);TLGK(5.14)HK(-5.14)HHEDHLK(-76.6);TLGK(13.01)HK(-13.01)HHEDHLK(-78.74);TLGK(0)HK(0)HHEDHLK(-93.62);TLGK(51.24)H…			_TLGK(bi)HKHHEDHLK_;_TLGK(bi)HK(bi)HHEDHLK_
PF3D7_0730900	P. falciparum	EMP1-trafficking protein										20.8807	20.4269	20.9478	21.2637	21.1301	21.5119	2 Biotin (K)	0	2			13166000	0.0053236	77.192	47.618	3	4	3	2216.11	12.778	TLGKHKHHEDHLKGK	222	NaN	NaN	NaN		NaN	NaN	NaN		1972	1986	_TLGK(bi)HK(bi)HHEDHLKGK_;_TLGK(bi)HK(bi)HHEDHLKGK_;_TLGK(bi)HK(bi)HHEDHLKGK_;_TLGK(bi)HK(bi)HHEDHLKGK_;_TLGK(bi)HK(bi)HHEDHLKGK_;_TLGK(bi)HK(bi)HHEDHLKGK_;_TLGK(bi)HK(bi)HHEDHLKGK_;_TLGK(bi)HK(bi)HHEDHLKGK_;_TLGK(bi)HK(bi)HHEDHLKGK_;_TLGK(bi)HKHHEDHLKGK_;_TLGK(bi)HKHHEDHLKGK_;_TLGK(bi)HKHHEDHLKGK_	TLGK(1)HK(1)HHEDHLKGK;TLGK(1)HK(1)HHEDHLKGK;TLGK(1)HK(1)HHEDHLKGK;TLGK(1)HK(1)HHEDHLKGK;TLGK(0.731)HK(0.269)HHEDHLKGK;TLGK(0.948)HK(0.051)HHEDHLKGK	TLGK(60.57)HK(56.91)HHEDHLK(-56.91)GK(-59.98);TLGK(41.94)HK(41.94)HHEDHLK(-41.94)GK(-41.94);TLGK(69.48)HK(65.27)HHEDHLK(-65.27)GK(-69.28);TLGK(55.2)HK(51.84)HHEDHLK(-51.84)GK(-54.91);TLGK(4.34)HK(-4.34)HHEDHLK(-39.08)GK(-42.09);TLGK(12.66)HK(-12.66)HHEDHLK(-42.15)GK(-46.82)			_TLGK(bi)HK(bi)HHEDHLKGK_;_TLGK(bi)HKHHEDHLKGK_
PF3D7_0730900	P. falciparum	EMP1-trafficking protein										20.8376	21.5278	20.3347	20.6477	21.7501	21.0225	2 Biotin (K)	0	2			13520000	0.0079023	63.447	39.04	3	NaN	3	2794.38	13.785	TLGKHKHHEKGVNVQSSNTNK	222	1	85.177	78.4155	+	NaN	NaN	NaN		2082	2102	_TLGKHK(bi)HHEK(bi)GVNVQSSNTNK_;_TLGK(bi)HKHHEK(bi)GVNVQSSNTNK_;_TLGK(bi)HKHHEK(bi)GVNVQSSNTNK_;_TLGK(bi)HKHHEK(bi)GVNVQSSNTNK_;_TLGK(bi)HKHHEK(bi)GVNVQSSNTNK_;_TLGK(bi)HKHHEK(bi)GVNVQSSNTNK_;_TLGK(bi)HKHHEK(bi)GVNVQSSNTNK_;_TLGK(bi)HK(bi)HHEK(bi)GVNVQSSNTNK_;_TLGK(bi)HK(bi)HHEK(bi)GVNVQSSNTNK_;_TLGK(bi)HK(bi)HHEK(bi)GVNVQSSNTNK_;_TLGK(bi)HK(bi)HHEK(bi)GVNVQSSNTNK_;_TLGK(bi)HK(bi)HHEK(bi)GVNVQSSN…	TLGK(0.143)HK(0.86)HHEK(0.997)GVNVQSSNTNK;TLGK(0.522)HK(0.522)HHEK(0.957)GVNVQSSNTNK;TLGK(1)HK(1)HHEK(1)GVNVQSSNTNK;TLGK(1)HK(1)HHEK(1)GVNVQSSNTNK;TLGK(1)HK(1)HHEK(1)GVNVQSSNTNK;TLGK(1)HK(1)HHEK(1)GVNVQSSNTNK;TLGK(1)HK(1)HHEK(1)GVNVQSSNTNK;TLGK(1)HK(1)HHEK(1)GVNVQSSNTNK	TLGK(-7.87)HK(7.87)HHEK(25.24)GVNVQSSNTNK(-39.81);TLGK(0)HK(0)HHEK(10.41)GVNVQSSNTNK(-54.67);TLGK(117.73)HK(117.34)HHEK(94.34)GVNVQSSNTNK(-94.34);TLGK(72.22)HK(72.62)HHEK(63.19)GVNVQSSNTNK(-63.19);TLGK(93.22)HK(93.22)HHEK(87.3)GVNVQSSNTNK(-87.3);TLGK(49.77)HK(52.69)HHEK(50.14)GVNVQSSNTNK(-49.77);TLGK(69.16)HK(72.93)HHEK(61.84)GVNVQSSNTNK(-61.84);TLGK(78.42)HK(78.42)HHEK(63.93)GVNVQSSNTNK(-63.93)			_TLGKHK(bi)HHEK(bi)GVNVQSSNTNK_;_TLGK(bi)HKHHEK(bi)GVNVQSSNTNK_;_TLGK(bi)HK(bi)HHEK(bi)GVNVQSSNTNK_
PF3D7_0202000	P. falciparum	knob-associated histidine-rich protein					18.264											2 Biotin (K)	0	2			314790	0.00037122	113.52	67.364	2	3	3	2229.02	15.479	TNEENKNKEKTNNSK	117	0.96975	113.52	22.0925	+	NaN	NaN	NaN		454	468	_TNEENKNKEK(bi)TNNSK_;_TNEENKNKEK(bi)TNNSK_;_TNEENKNKEK(bi)TNNSK_;_TNEENKNKEK(bi)TNNSK_;_TNEENKNKEK(bi)TNNSK_;_TNEENK(bi)NKEK(bi)TNNSK_;_TNEENKNK(bi)EK(bi)TNNSK_	TNEENKNK(0.002)EK(0.998)TNNSK;TNEENKNKEK(0.995)TNNSK(0.004);TNEENK(0.941)NK(0.06)EK(0.999)TNNSK(0.001);TNEENK(0.035)NK(0.965)EK(0.996)TNNSK(0.004)	TNEENK(-53.52)NK(-26.71)EK(26.71)TNNSK(-35.93);TNEENK(-71.06)NK(-36.98)EK(23.56)TNNSK(-23.56);TNEENK(11.99)NK(-11.99)EK(32.19)TNNSK(-32.19);TNEENK(-14.45)NK(14.45)EK(24.07)TNNSK(-24.07)			_TNEENKNKEK(bi)TNNSK_;_TNEENK(bi)NKEK(bi)TNNSK_;_TNEENKNK(bi)EK(bi)TNNSK_
PF3D7_0202000	P. falciparum	knob-associated histidine-rich protein				21.6565	22.1081	21.5721	22.1418	22.2664	21.6967							2 Biotin (K)	0	2			24016000	2.38e-06	134.52	85.251	8	3	2	2302.07	20.044	TQGGKTDKTGASTNAATNK	117	NaN	NaN	NaN		NaN	NaN	NaN		513	531	_TQGGK(bi)TDKTGASTNAATNK_;_TQGGKTDK(bi)TGASTNAATNK_;_TQGGK(bi)TDKTGASTNAATNK_;_TQGGKTDK(bi)TGASTNAATNK_;_TQGGK(bi)TDKTGASTNAATNK_;_TQGGKTDK(bi)TGASTNAATNK_;_TQGGKTDK(bi)TGASTNAATNK_;_TQGGK(bi)TDKTGASTNAATNK_;_TQGGKTDK(bi)TGASTNAATNK_;_TQGGK(bi)TDKTGASTNAATNK_;_TQGGKTDK(bi)TGASTNAATNK_;_TQGGKTDK(bi)TGASTNAATNK_;_TQGGKTDK(bi)TGASTNAATNK_;_TQGGKTDK(bi)TGASTNAATNK_;_TQGGKTDK(bi)TGASTNAATNK_;_TQGGKTDK…	TQGGK(0.998)TDK(0.002)TGASTNAATNK;TQGGKTDK(1)TGASTNAATNK;TQGGK(0.983)TDK(0.017)TGASTNAATNK;TQGGKTDK(1)TGASTNAATNK;TQGGK(0.997)TDK(0.003)TGASTNAATNK;TQGGKTDK(1)TGASTNAATNK;TQGGKTDK(1)TGASTNAATNK;TQGGK(0.927)TDK(0.073)TGASTNAATNK;TQGGKTDK(1)TGASTNAATNK;TQGGK(0.963)TDK(0.037)TGASTNAATNK;TQGGKTDK(1)TGASTNAATNK;TQGGK(0.006)TDK(0.994)TGASTNAATNK;TQGGK(0.014)TDK(0.986)TGASTNAATNK;TQGGK(0.252)TDK(0.748)T…	TQGGK(27.67)TDK(-27.67)TGASTNAATNK(-93.03);TQGGK(-36.72)TDK(36.72)TGASTNAATNK(-79.77);TQGGK(17.63)TDK(-17.63)TGASTNAATNK(-48.35);TQGGK(-46.93)TDK(46.93)TGASTNAATNK(-85.61);TQGGK(24.85)TDK(-24.85)TGASTNAATNK(-75.9);TQGGK(-42.56)TDK(42.56)TGASTNAATNK(-115.57);TQGGK(-49.09)TDK(49.09)TGASTNAATNK(-88.02);TQGGK(11.01)TDK(-11.01)TGASTNAATNK(-60.55);TQGGK(-57.93)TDK(57.93)TGASTNAATNK(-116.68);TQGGK(14.17…			_TQGGK(bi)TDKTGASTNAATNK_;_TQGGKTDK(bi)TGASTNAATNK_;_TQGGK(bi)TDK(bi)TGASTNAATNK_
PF3D7_0202000	P. falciparum	knob-associated histidine-rich protein				23.7286	23.0655	23.2678	24.4923	23.9406	23.5045							2 Biotin (K)	0	2			84454000	2.35e-52	206.31	157.54	41	NaN	3	3275.5	19.615	TQGGKTDKTGASTNAATNKGQCAAEGATK	117	1	170.83	133.006	+	NaN	NaN	NaN		513	541	_TQGGK(bi)TDKTGASTNAATNKGQCAAEGATK_;_TQGGK(bi)TDKTGASTNAATNKGQCAAEGATK_;_TQGGKTDK(bi)TGASTNAATNKGQCAAEGATK_;_TQGGKTDKTGASTNAATNK(bi)GQCAAEGATK_;_TQGGKTDKTGASTNAATNK(bi)GQCAAEGATK_;_TQGGKTDK(bi)TGASTNAATNKGQCAAEGATK_;_TQGGK(bi)TDKTGASTNAATNKGQCAAEGATK_;_TQGGKTDK(bi)TGASTNAATNKGQCAAEGATK_;_TQGGKTDK(bi)TGASTNAATNKGQCAAEGATK_;_TQGGKTDKTGASTNAATNK(bi)GQCAAEGATK_;_TQGGKTDKTGASTNAATNK(bi)GQCAAEGATK_;_TQ…	TQGGK(0.957)TDK(0.043)TGASTNAATNKGQCAAEGATK;TQGGK(0.5)TDK(0.5)TGASTNAATNKGQCAAEGATK;TQGGK(0.002)TDK(0.998)TGASTNAATNKGQCAAEGATK;TQGGKTDKTGASTNAATNK(1)GQCAAEGATK;TQGGKTDK(0.003)TGASTNAATNK(0.997)GQCAAEGATK;TQGGK(0.252)TDK(0.748)TGASTNAATNKGQCAAEGATK;TQGGK(0.744)TDK(0.256)TGASTNAATNKGQCAAEGATK;TQGGK(0.014)TDK(0.986)TGASTNAATNKGQCAAEGATK;TQGGK(0.007)TDK(0.979)TGASTNAATNK(0.015)GQCAAEGATK;TQGGKTDKTGA…	TQGGK(13.49)TDK(-13.49)TGASTNAATNK(-58.56)GQCAAEGATK(-80.71);TQGGK(0)TDK(0)TGASTNAATNK(-66.8)GQCAAEGATK(-83.69);TQGGK(-26.67)TDK(26.67)TGASTNAATNK(-111.33)GQCAAEGATK(-139.72);TQGGK(-67.96)TDK(-69.19)TGASTNAATNK(67.96)GQCAAEGATK(-88.79);TQGGK(-33.53)TDK(-25.9)TGASTNAATNK(25.9)GQCAAEGATK(-33.71);TQGGK(-4.73)TDK(4.73)TGASTNAATNK(-35.04)GQCAAEGATK(-46.79);TQGGK(4.62)TDK(-4.62)TGASTNAATNK(-87.21)GQCAA…			_TQGGK(bi)TDKTGASTNAATNKGQCAAEGATK_;_TQGGKTDK(bi)TGASTNAATNKGQCAAEGATK_;_TQGGKTDKTGASTNAATNK(bi)GQCAAEGATK_;_TQGGK(bi)TDK(bi)TGASTNAATNKGQCAAEGATK_;_TQGGKTDK(bi)TGASTNAATNK(bi)GQCAAEGATK_;_TQGGK(bi)TDKTGASTNAATNK(bi)GQCAAEGATK_
PF3D7_0730900	P. falciparum	EMP1-trafficking protein										22.9458	23.2821					2 Biotin (K)	0	2			18293000	0.0016928	103.14	17.601	2	3	3	2045.02	23.363	TVNKQNKFSNTGKK	222	NaN	NaN	NaN		NaN	NaN	NaN		292	305	_TVNK(bi)QNKFSNTGKK_;_TVNKQNK(bi)FSNTGKK_;_TVNKQNK(bi)FSNTGKK_;_TVNK(bi)QNKFSNTGKK_;_TVNKQNK(bi)FSNTGKK_;_TVNK(bi)QNKFSNTGKK_;_TVNK(bi)QNKFSNTGKK_;_TVNKQNK(bi)FSNTGKK_;_TVNK(bi)QNKFSNTGKK_;_TVNKQNK(bi)FSNTGKK_;_TVNKQNK(bi)FSNTGKK_;_TVNKQNK(bi)FSNTGKK_;_TVNK(bi)QNKFSNTGKK_;_TVNKQNK(bi)FSNTGKK_;_TVNKQNK(bi)FSNTGKK_;_TVNKQNK(bi)FSNTGKK_;_TVNK(bi)QNKFSNTGKK_;_TVNKQNK(bi)FSNTGKK_;_TVNKQNK(bi)FSNTGKK_;…	TVNK(0.999)QNK(0.001)FSNTGKK;TVNK(0.004)QNK(0.996)FSNTGKK;TVNK(0.003)QNK(0.997)FSNTGKK;TVNK(0.998)QNK(0.002)FSNTGKK;TVNK(0.002)QNK(0.998)FSNTGKK;TVNK(0.999)QNK(0.001)FSNTGKK;TVNK(0.864)QNK(0.135)FSNTGK(0.001)K;TVNK(0.001)QNK(0.999)FSNTGKK;TVNK(0.991)QNK(0.008)FSNTGKK;TVNK(0.001)QNK(0.999)FSNTGKK;TVNK(0.028)QNK(0.972)FSNTGKK;TVNKQNK(1)FSNTGKK;TVNK(0.982)QNK(0.018)FSNTGKK;TVNKQNK(1)FSNTGKK;TVNKQNK(…	TVNK(32.77)QNK(-32.77)FSNTGK(-62.31)K(-57.64);TVNK(-24.24)QNK(24.24)FSNTGK(-78.86)K(-84.42);TVNK(-25.58)QNK(25.58)FSNTGK(-59.1)K(-65.91);TVNK(26.18)QNK(-26.18)FSNTGK(-57.44)K(-62.2);TVNK(-27.57)QNK(27.57)FSNTGK(-39.62)K(-39.62);TVNK(31.93)QNK(-31.93)FSNTGK(-60.91)K(-66.34);TVNK(8.06)QNK(-8.06)FSNTGK(-29.19)K(-33.98);TVNK(-28.99)QNK(28.99)FSNTGK(-59.7)K(-58.91);TVNK(20.74)QNK(-20.74)FSNTGK(-35.32)…			_TVNK(bi)QNKFSNTGKK_;_TVNKQNK(bi)FSNTGKK_;_TVNK(bi)QNK(bi)FSNTGKK_
PF3D7_0532400	P. falciparum	lysine-rich membrane-associated PHISTb protein					20.3344	19.9654		20.305	20.1471							2 Biotin (K)	0	2			4802400	0.0017223	123.95	78.056	1	3	3	1896.95	18.191	VGSKNTKVGGENKK	185	1	123.95	102.699	+	NaN	NaN	NaN		462	475	_VGSKNTK(bi)VGGENKK_;_VGSKNTK(bi)VGGENKK_;_VGSKNTK(bi)VGGENKK_;_VGSKNTK(bi)VGGENKK_;_VGSKNTK(bi)VGGENKK_;_VGSKNTK(bi)VGGENKK_;_VGSKNTK(bi)VGGENKK_;_VGSKNTK(bi)VGGENKK_;_VGSKNTK(bi)VGGENKK_;_VGSKNTK(bi)VGGENKK_;_VGSKNTK(bi)VGGENKK_;_VGSKNTK(bi)VGGENKK_;_VGSKNTK(bi)VGGENKK_;_VGSK(bi)NTK(bi)VGGENKK_;_VGSK(bi)NTK(bi)VGGENKK_;_VGSK(bi)NTK(bi)VGGENKK_;_VGSK(bi)NTK(bi)VGGENKK_	VGSK(0.074)NTK(0.926)VGGENKK;VGSK(0.215)NTK(0.785)VGGENKK;VGSK(0.012)NTK(0.988)VGGENKK;VGSK(0.009)NTK(0.991)VGGENKK;VGSK(0.038)NTK(0.96)VGGENK(0.001)K(0.001);VGSK(0.124)NTK(0.876)VGGENKK;VGSK(0.001)NTK(0.972)VGGENK(0.022)K(0.004);VGSK(0.008)NTK(0.992)VGGENKK;VGSK(1)NTK(1)VGGENKK;VGSK(1)NTK(1)VGGENKK	VGSK(-10.96)NTK(10.96)VGGENK(-55.4)K(-55.95);VGSK(-5.62)NTK(5.62)VGGENK(-39.07)K(-38.32);VGSK(-19.21)NTK(19.21)VGGENK(-33.83)K(-40.37);VGSK(-20.58)NTK(20.58)VGGENK(-46.78)K(-52.96);VGSK(-14.06)NTK(14.06)VGGENK(-29.01)K(-28.31);VGSK(-8.5)NTK(8.5)VGGENK(-43.99)K(-47.58);VGSK(-29.27)NTK(16.38)VGGENK(-16.38)K(-23.48);VGSK(-20.71)NTK(20.71)VGGENK(-63.3)K(-64.14);VGSK(59.57)NTK(49.06)VGGENK(-49.06)K(-4…			_VGSKNTK(bi)VGGENKK_;_VGSK(bi)NTK(bi)VGGENKK_
PF3D7_0500800	P. falciparum	mature parasite-infected erythrocyte surface antigen				21.7496	21.7606		21.737	21.7727	21.661							2 Biotin (K)	0	2			17474000	0.033452	81.625	32.324	2	3	3	1681.84	20.65	VKKPIDDCKK	159	0.999998	81.625	57.9486	+	NaN	NaN	NaN		1184	1193	_VKK(bi)PIDDCKK_;_VKK(bi)PIDDCKK_;_VKK(bi)PIDDCKK_;_VKK(bi)PIDDCKK_;_VKK(bi)PIDDCKK_;_VK(bi)KPIDDCKK_;_VKK(bi)PIDDCKK_;_VKK(bi)PIDDCKK_;_VK(bi)KPIDDCKK_;_VKK(bi)PIDDCKK_;_VKK(bi)PIDDCKK_;_VKKPIDDCK(bi)K_;_VKK(bi)PIDDCKK_;_VKK(bi)PIDDCKK_;_VKK(bi)PIDDCKK_;_VKK(bi)PIDDCKK_;_VKK(bi)PIDDCKK_;_VKK(bi)PIDDCKK_;_VKK(bi)PIDDCKK_;_VKK(bi)PIDDCKK_;_VKK(bi)PIDDCKK_;_VKK(bi)PIDDCKK_;_VK(bi)K(bi)PIDDCKK_;_VK(…	VK(0.001)K(0.998)PIDDCK(0.001)K;VKK(1)PIDDCKK;VKK(1)PIDDCKK;VKK(0.956)PIDDCK(0.044)K;VKK(1)PIDDCKK;VK(0.976)K(0.024)PIDDCKK;VK(0.004)K(0.996)PIDDCKK;VKK(1)PIDDCKK;VK(0.846)K(0.154)PIDDCKK;VKK(1)PIDDCKK;VKK(1)PIDDCKK;VKKPIDDCK(0.991)K(0.009);VKK(1)PIDDCKK;VK(0.417)K(0.583)PIDDCKK;VK(1)K(1)PIDDCKK	VK(-30.92)K(28.44)PIDDCK(-28.44)K(-51.9);VK(-40.94)K(40.94)PIDDCK(-83.44)K(-87.88);VK(-39.7)K(39.7)PIDDCK(-95.09)K(-117.84);VK(-38.47)K(13.38)PIDDCK(-13.38)K(-35.93);VK(-44.07)K(44.07)PIDDCK(-52.87)K(-64.45);VK(16.11)K(-16.11)PIDDCK(-102.16)K(-116.88);VK(-24.17)K(24.17)PIDDCK(-119.37)K(-127.01);VK(-46.19)K(46.19)PIDDCK(-105.25)K(-141.65);VK(7.4)K(-7.4)PIDDCK(-57.8)K(-66.63);VK(-55.64)K(55.64)PIDD…			_VKK(bi)PIDDCKK_;_VK(bi)KPIDDCKK_;_VKKPIDDCK(bi)K_;_VK(bi)K(bi)PIDDCKK_
PF3D7_0730900	P. falciparum	EMP1-trafficking protein										21.4623	22.2857		21.3064	21.3744	21.48	2 Biotin (K)	0	2			16239000	0.00090719	90.689	44.696	2	4	2	2192.06	18.262	VLGKNEHHEDHLKGK	222	NaN	NaN	NaN		NaN	NaN	NaN		1862	1876	_VLGKNEHHEDHLK(bi)GK_;_VLGKNEHHEDHLK(bi)GK_;_VLGK(bi)NEHHEDHLKGK_;_VLGK(bi)NEHHEDHLKGK_;_VLGKNEHHEDHLK(bi)GK_;_VLGKNEHHEDHLK(bi)GK_;_VLGK(bi)NEHHEDHLKGK_;_VLGKNEHHEDHLK(bi)GK_;_VLGKNEHHEDHLK(bi)GK_;_VLGKNEHHEDHLK(bi)GK_;_VLGKNEHHEDHLK(bi)GK_;_VLGK(bi)NEHHEDHLKGK_;_VLGK(bi)NEHHEDHLKGK_;_VLGKNEHHEDHLK(bi)GK_;_VLGK(bi)NEHHEDHLKGK_;_VLGKNEHHEDHLK(bi)GK_;_VLGK(bi)NEHHEDHLKGK_;_VLGKNEHHEDHLK(bi)GK_;_VL…	VLGKNEHHEDHLK(0.846)GK(0.154);VLGKNEHHEDHLK(0.851)GK(0.149);VLGK(0.999)NEHHEDHLK(0.001)GK;VLGK(1)NEHHEDHLKGK;VLGKNEHHEDHLK(0.956)GK(0.044);VLGKNEHHEDHLK(0.913)GK(0.087);VLGK(1)NEHHEDHLKGK;VLGKNEHHEDHLK(0.976)GK(0.024);VLGKNEHHEDHLK(0.843)GK(0.157);VLGKNEHHEDHLK(0.97)GK(0.03);VLGKNEHHEDHLK(0.958)GK(0.042);VLGK(1)NEHHEDHLKGK;VLGK(1)NEHHEDHLKGK;VLGKNEHHEDHLK(0.974)GK(0.026);VLGK(1)NEHHEDHLKGK;VLGKNE…	VLGK(-61.76)NEHHEDHLK(7.38)GK(-7.38);VLGK(-51.34)NEHHEDHLK(7.56)GK(-7.56);VLGK(32.59)NEHHEDHLK(-32.59)GK(-42.5);VLGK(45.62)NEHHEDHLK(-45.62)GK(-46.14);VLGK(-51.26)NEHHEDHLK(13.4)GK(-13.4);VLGK(-97.33)NEHHEDHLK(10.21)GK(-10.21);VLGK(49.53)NEHHEDHLK(-49.53)GK(-51.49);VLGK(-76.67)NEHHEDHLK(16.15)GK(-16.15);VLGK(-84.35)NEHHEDHLK(7.28)GK(-7.28);VLGK(-70.48)NEHHEDHLK(15.08)GK(-15.08);VLGK(-55.96)NEHHED…			_VLGKNEHHEDHLK(bi)GK_;_VLGK(bi)NEHHEDHLKGK_;_VLGK(bi)NEHHEDHLK(bi)GK_
PF3D7_0730900	P. falciparum	EMP1-trafficking protein					21.3092	19.6989	21.6901	21.2313	20.6311	27.2262	27.0608	26.7645	27.5682	26.7645	27.4154	2 Biotin (K)	0	2			913320000	1.74e-27	193.72	153.1	60	NaN	3	2823.37	22.44	VLGKNEHHEDHLKGKFVDNR	222	1	93.029	93.0294	+	NaN	NaN	NaN		1862	1881	_VLGKNEHHEDHLKGK(bi)FVDNR_;_VLGKNEHHEDHLKGK(bi)FVDNR_;_VLGKNEHHEDHLKGK(bi)FVDNR_;_VLGKNEHHEDHLKGK(bi)FVDNR_;_VLGKNEHHEDHLKGK(bi)FVDNR_;_VLGKNEHHEDHLKGK(bi)FVDNR_;_VLGKNEHHEDHLKGK(bi)FVDNR_;_VLGKNEHHEDHLKGK(bi)FVDNR_;_VLGKNEHHEDHLKGK(bi)FVDNR_;_VLGKNEHHEDHLKGK(bi)FVDNR_;_VLGKNEHHEDHLKGK(bi)FVDNR_;_VLGKNEHHEDHLKGK(bi)FVDNR_;_VLGKNEHHEDHLKGK(bi)FVDNR_;_VLGKNEHHEDHLKGK(bi)FVDNR_;_VLGKNEHHEDHLKGK(bi)F…	VLGKNEHHEDHLK(0.077)GK(0.923)FVDNR;VLGKNEHHEDHLK(0.143)GK(0.857)FVDNR;VLGKNEHHEDHLK(0.403)GK(0.597)FVDNR;VLGKNEHHEDHLK(0.048)GK(0.952)FVDNR;VLGKNEHHEDHLK(0.111)GK(0.889)FVDNR;VLGKNEHHEDHLK(0.223)GK(0.777)FVDNR;VLGKNEHHEDHLK(0.143)GK(0.857)FVDNR;VLGKNEHHEDHLK(0.025)GK(0.975)FVDNR;VLGKNEHHEDHLK(0.043)GK(0.957)FVDNR;VLGKNEHHEDHLK(0.035)GK(0.965)FVDNR;VLGKNEHHEDHLK(0.401)GK(0.598)FVDNR;VLGKNEHHEDHLK(…	VLGK(-59.35)NEHHEDHLK(-10.78)GK(10.78)FVDNR;VLGK(-54.99)NEHHEDHLK(-7.78)GK(7.78)FVDNR;VLGK(-38.21)NEHHEDHLK(-1.7)GK(1.7)FVDNR;VLGK(-57.55)NEHHEDHLK(-12.99)GK(12.99)FVDNR;VLGK(-52.81)NEHHEDHLK(-9.02)GK(9.02)FVDNR;VLGK(-57.85)NEHHEDHLK(-5.43)GK(5.43)FVDNR;VLGK(-46.67)NEHHEDHLK(-7.78)GK(7.78)FVDNR;VLGK(-121.76)NEHHEDHLK(-15.93)GK(15.93)FVDNR;VLGK(-110.36)NEHHEDHLK(-13.51)GK(13.51)FVDNR;VLGK(-131.81)…			_VLGKNEHHEDHLKGK(bi)FVDNR_;_VLGKNEHHEDHLK(bi)GK(bi)FVDNR_;_VLGK(bi)NEHHEDHLKGK(bi)FVDNR_;_VLGK(bi)NEHHEDHLK(bi)GK(bi)FVDNR_
PF3D7_0730900	P. falciparum	EMP1-trafficking protein												19.9106			20.0666	2 Biotin (K)	0	2			2083700	0.0014631	144.28	63.448	3	2	2	1724.87	21.08	VNTKTVNKQNK	222	1	138.42	88.0687	+	NaN	NaN	NaN		288	298	_VNTK(bi)TVNKQNK_;_VNTK(bi)TVNKQNK_;_VNTK(bi)TVNKQNK_;_VNTK(bi)TVNKQNK_;_VNTK(bi)TVNKQNK_;_VNTK(bi)TVNKQNK_;_VNTK(bi)TVNKQNK_;_VNTK(bi)TVNKQNK_;_VNTK(bi)TVNKQNK_;_VNTK(bi)TVNKQNK_;_VNTK(bi)TVNKQNK_;_VNTK(bi)TVNKQNK_;_VNTK(bi)TVNKQNK_;_VNTK(bi)TVNKQNK_;_VNTK(bi)TVNKQNK_;_VNTK(bi)TVNK(bi)QNK_;_VNTK(bi)TVNK(bi)QNK_;_VNTK(bi)TVNK(bi)QNK_;_VNTK(bi)TVNK(bi)QNK_	VNTK(1)TVNKQNK;VNTK(0.976)TVNK(0.024)QNK;VNTK(0.998)TVNK(0.002)QNK;VNTK(1)TVNKQNK;VNTK(1)TVNKQNK;VNTK(1)TVNKQNK;VNTK(1)TVNKQNK;VNTK(0.98)TVNK(0.02)QNK;VNTK(1)TVNKQNK;VNTK(0.999)TVNK(0.001)QNK;VNTK(1)TVNK(1)QNK;VNTK(1)TVNK(1)QNK;VNTK(1)TVNK(1)QNK	VNTK(41.26)TVNK(-41.26)QNK(-49.23);VNTK(16.14)TVNK(-16.14)QNK(-33.4);VNTK(26.94)TVNK(-26.94)QNK(-50.81);VNTK(34.75)TVNK(-34.75)QNK(-56.98);VNTK(94.68)TVNK(-94.68)QNK(-124.18);VNTK(34.69)TVNK(-34.69)QNK(-104.47);VNTK(46.46)TVNK(-46.46)QNK(-67.32);VNTK(17)TVNK(-17)QNK(-53.35);VNTK(59.19)TVNK(-59.19)QNK(-81.21);VNTK(32.87)TVNK(-32.87)QNK(-73.67);VNTK(108.69)TVNK(58.17)QNK(-58.17);VNTK(90.47)TVNK(50.…			_VNTK(bi)TVNKQNK_;_VNTK(bi)TVNK(bi)QNK_
PF3D7_1016300	P. falciparum	glycophorin binding protein				22.1692	21.6704	21.3055	22.1668	21.7691	21.4669							2 Biotin (K)	0	2			21826000	2.2e-12	166.9	124.33	6	3	3	2479.26	26.4	VVKKQINIGDTENQKEGK	289	1	126.07	95.5587	+	NaN	NaN	NaN		146	163	_VVK(bi)K(bi)QINIGDTENQKEGK_;_VVK(bi)K(bi)QINIGDTENQKEGK_;_VVK(bi)K(bi)QINIGDTENQKEGK_;_VVK(bi)K(bi)QINIGDTENQKEGK_;_VVK(bi)K(bi)QINIGDTENQKEGK_;_VVK(bi)K(bi)QINIGDTENQKEGK_	VVK(1)K(1)QINIGDTENQKEGK;VVK(1)K(1)QINIGDTENQKEGK;VVK(1)K(1)QINIGDTENQKEGK;VVK(1)K(1)QINIGDTENQKEGK;VVK(1)K(1)QINIGDTENQKEGK;VVK(1)K(1)QINIGDTENQKEGK	VVK(99.63)K(88.36)QINIGDTENQK(-88.36)EGK(-97.94);VVK(103.24)K(90.23)QINIGDTENQK(-90.23)EGK(-107.21);VVK(102.27)K(90.72)QINIGDTENQK(-90.72)EGK(-96.31);VVK(127.51)K(114.33)QINIGDTENQK(-114.33)EGK(-125.63);VVK(130.78)K(118.48)QINIGDTENQK(-118.48)EGK(-124.09);VVK(100.92)K(90.2)QINIGDTENQK(-90.2)EGK(-98.8)			_VVK(bi)K(bi)QINIGDTENQKEGK_
PF3D7_0209000	P. falciparum	6-cysteine protein											20.5198		17.6453			2 Biotin (K)	0	2			1708400	0.03849	51.612	6.6861	0	5	2	2072.01	11.645	YALLLDDEERQKK	125	NaN	NaN	NaN		NaN	NaN	NaN		2397	2409	_YALLLDDEERQK(bi)K(bi)_;_YALLLDDEERQK(bi)K(bi)_	YALLLDDEERQK(1)K(1)	YALLLDDEERQK(51.61)K(51.61)			_YALLLDDEERQK(bi)K(bi)_
PF3D7_0113700	P. falciparum	heat shock protein 40, type II										23.0882	22.8006		21.852	22.5587	21.6528	2 Biotin (K)	0	2			29484000	0.00016682	96.633	58.92	8	NaN	2	3215.58	37.459	YFSKSSGAGNHNIFTHIKNLYPLR	109	1	77.1	77.0996	+	NaN	NaN	NaN		186	209	_YFSK(bi)SSGAGNHNIFTHIK(bi)NLYPLR_;_YFSK(bi)SSGAGNHNIFTHIK(bi)NLYPLR_;_YFSK(bi)SSGAGNHNIFTHIK(bi)NLYPLR_;_YFSK(bi)SSGAGNHNIFTHIK(bi)NLYPLR_;_YFSK(bi)SSGAGNHNIFTHIK(bi)NLYPLR_;_YFSK(bi)SSGAGNHNIFTHIK(bi)NLYPLR_	YFSK(1)SSGAGNHNIFTHIK(1)NLYPLR;YFSK(1)SSGAGNHNIFTHIK(1)NLYPLR;YFSK(1)SSGAGNHNIFTHIK(1)NLYPLR;YFSK(1)SSGAGNHNIFTHIK(1)NLYPLR;YFSK(1)SSGAGNHNIFTHIK(1)NLYPLR	YFSK(80.75)SSGAGNHNIFTHIK(80.75)NLYPLR;YFSK(105.94)SSGAGNHNIFTHIK(105.94)NLYPLR;YFSK(65.92)SSGAGNHNIFTHIK(65.92)NLYPLR;YFSK(96.63)SSGAGNHNIFTHIK(96.63)NLYPLR;YFSK(77.1)SSGAGNHNIFTHIK(77.1)NLYPLR			_YFSK(bi)SSGAGNHNIFTHIK(bi)NLYPLR_
PF3D7_0202000	P. falciparum	knob-associated histidine-rich protein				18.5302	22.0965			18.8798	18.1593							2 Biotin (K)	0	2			5638000	0.040642	51.939	15.618	1	4	2	1960.87	13.063	YGKHGDEKHHSSK	117	1	170	82.7887	+	NaN	NaN	NaN		352	364	_YGK(bi)HGDEKHHSSK_;_YGK(bi)HGDEKHHSSK_;_YGK(bi)HGDEKHHSSK_;_YGK(bi)HGDEKHHSSK_;_YGK(bi)HGDEKHHSSK_;_YGK(bi)HGDEKHHSSK_;_YGK(bi)HGDEKHHSSK_;_YGK(bi)HGDEKHHSSK_;_YGK(bi)HGDEKHHSSK_;_YGK(bi)HGDEKHHSSK_;_YGK(bi)HGDEKHHSSK_;_YGK(bi)HGDEKHHSSK_;_YGK(bi)HGDEKHHSSK_;_YGK(bi)HGDEKHHSSK_;_YGK(bi)HGDEKHHSSK_;_YGK(bi)HGDEK(bi)HHSSK_;_YGK(bi)HGDEK(bi)HHSSK_;_YGK(bi)HGDEK(bi)HHSSK_;_YGK(bi)HGDEK(bi)HHSSK_	YGK(1)HGDEKHHSSK;YGK(1)HGDEKHHSSK;YGK(1)HGDEKHHSSK;YGK(1)HGDEKHHSSK;YGK(1)HGDEKHHSSK;YGK(1)HGDEKHHSSK;YGK(1)HGDEKHHSSK;YGK(1)HGDEKHHSSK;YGK(1)HGDEKHHSSK;YGK(1)HGDEKHHSSK;YGK(1)HGDEKHHSSK;YGK(1)HGDEK(0.998)HHSSK(0.002)	YGK(60.96)HGDEK(-60.96)HHSSK(-74.44);YGK(56.92)HGDEK(-56.92)HHSSK(-114.93);YGK(49.96)HGDEK(-49.96)HHSSK(-63.82);YGK(70.33)HGDEK(-70.33)HHSSK(-81.72);YGK(82.79)HGDEK(-82.79)HHSSK(-145.65);YGK(56.21)HGDEK(-56.21)HHSSK(-76.16);YGK(68.02)HGDEK(-68.02)HHSSK(-79.08);YGK(55.31)HGDEK(-55.31)HHSSK(-85.85);YGK(61.86)HGDEK(-61.86)HHSSK(-77.74);YGK(57.8)HGDEK(-57.8)HHSSK(-96.75);YGK(49.2)HGDEK(-49.2)HHSSK(-7…			_YGK(bi)HGDEKHHSSK_;_YGK(bi)HGDEK(bi)HHSSK_
PF3D7_0730900	P. falciparum	EMP1-trafficking protein										24.7077	24.48	24.1332	24.5696	24.2891	24.7492	2 Biotin (K)	0	2			142900000	1.42e-11	144.4	95.725	8	3	2	3044.43	42.355	YNDDGGINKEIYTPKIYVSEFK	222	1	95.996	78.535	+	NaN	NaN	NaN		577	598	_YNDDGGINKEIYTPK(bi)IYVSEFK_;_YNDDGGINKEIYTPK(bi)IYVSEFK_;_YNDDGGINKEIYTPK(bi)IYVSEFK_;_YNDDGGINKEIYTPK(bi)IYVSEFK_;_YNDDGGINKEIYTPK(bi)IYVSEFK_;_YNDDGGINKEIYTPK(bi)IYVSEFK_;_YNDDGGINKEIYTPK(bi)IYVSEFK_;_YNDDGGINKEIYTPK(bi)IYVSEFK_;_YNDDGGINK(bi)EIYTPK(bi)IYVSEFK_;_YNDDGGINK(bi)EIYTPK(bi)IYVSEFK_;_YNDDGGINK(bi)EIYTPK(bi)IYVSEFK_;_YNDDGGINK(bi)EIYTPK(bi)IYVSEFK_;_YNDDGGINK(bi)EIYTPK(bi)IYVSEFK_;_Y…	YNDDGGINKEIYTPK(0.996)IYVSEFK(0.004);YNDDGGINKEIYTPK(0.999)IYVSEFK(0.001);YNDDGGINKEIYTPK(1)IYVSEFK;YNDDGGINKEIYTPK(1)IYVSEFK;YNDDGGINKEIYTPK(1)IYVSEFK;YNDDGGINKEIYTPK(1)IYVSEFK;YNDDGGINKEIYTPK(1)IYVSEFK;YNDDGGINKEIYTPK(1)IYVSEFK;YNDDGGINK(1)EIYTPK(0.998)IYVSEFK(0.002);YNDDGGINK(1)EIYTPK(1)IYVSEFK;YNDDGGINK(1)EIYTPK(0.998)IYVSEFK(0.002);YNDDGGINK(1)EIYTPK(0.983)IYVSEFK(0.017);YNDDGGINK(1)EIYTPK(0…	YNDDGGINK(-52.16)EIYTPK(23.61)IYVSEFK(-23.61);YNDDGGINK(-64.07)EIYTPK(29.6)IYVSEFK(-29.6);YNDDGGINK(-169.74)EIYTPK(64.99)IYVSEFK(-64.99);YNDDGGINK(-164.59)EIYTPK(38.11)IYVSEFK(-38.11);YNDDGGINK(-135.93)EIYTPK(42.7)IYVSEFK(-42.7);YNDDGGINK(-150.85)EIYTPK(50.44)IYVSEFK(-50.44);YNDDGGINK(-126.44)EIYTPK(37.4)IYVSEFK(-37.4);YNDDGGINK(-144.18)EIYTPK(40.84)IYVSEFK(-40.84);YNDDGGINK(118.04)EIYTPK(27.06)I…			_YNDDGGINKEIYTPK(bi)IYVSEFK_;_YNDDGGINK(bi)EIYTPK(bi)IYVSEFK_
PF3D7_0730900	P. falciparum	EMP1-trafficking protein										24.2535	24.7846	24.5696	24.4298	25.5463	25.3239	2 Biotin (K)	0	2			187330000	5.14e-06	88.834	45.478	3	NaN	2	3775.7	42.621	YNDYASKSHGMSSVLKSVISGFTETCNDVK	222	1	88.834	81.3337	+	NaN	NaN	NaN		162	191	_YNDYASK(bi)SHGMSSVLK(bi)SVISGFTETCNDVK_;_YNDYASK(bi)SHGMSSVLK(bi)SVISGFTETCNDVK_;_YNDYASK(bi)SHGMSSVLK(bi)SVISGFTETCNDVK_;_YNDYASK(bi)SHGMSSVLK(bi)SVISGFTETCNDVK_;_YNDYASK(bi)SHGMSSVLK(bi)SVISGFTETCNDVK_;_YNDYASK(bi)SHGMSSVLK(bi)SVISGFTETCNDVK_;_YNDYASK(bi)SHGMSSVLK(bi)SVISGFTETCNDVK_;_YNDYASK(bi)SHGMSSVLK(bi)SVISGFTETCNDVK_;_YNDYASK(bi)SHGMSSVLK(bi)SVISGFTETCNDVK_	YNDYASK(1)SHGMSSVLK(1)SVISGFTETCNDVK;YNDYASK(1)SHGMSSVLK(1)SVISGFTETCNDVK;YNDYASK(1)SHGMSSVLK(1)SVISGFTETCNDVK	YNDYASK(81.33)SHGMSSVLK(64.8)SVISGFTETCNDVK(-64.8);YNDYASK(67.37)SHGMSSVLK(52.19)SVISGFTETCNDVK(-52.19);YNDYASK(58.27)SHGMSSVLK(51.3)SVISGFTETCNDVK(-51.3)			_YNDYASK(bi)SHGMSSVLK(bi)SVISGFTETCNDVK_
PF3D7_0202000	P. falciparum	knob-associated histidine-rich protein				25.6513	24.8385	24.1332	26.2133	25.7338	25.8069							2 Biotin (K)	0	2			293380000	1.98e-16	195.23	137.07	15	NaN	2	2384.06	25.875	YSSFSSVNKYGKHGDEK	117	NaN	NaN	NaN		NaN	NaN	NaN		343	359	_YSSFSSVNKYGK(bi)HGDEK_;_YSSFSSVNKYGK(bi)HGDEK_;_YSSFSSVNKYGK(bi)HGDEK_;_YSSFSSVNKYGK(bi)HGDEK_;_YSSFSSVNKYGK(bi)HGDEK_;_YSSFSSVNKYGK(bi)HGDEK_;_YSSFSSVNKYGK(bi)HGDEK_;_YSSFSSVNKYGK(bi)HGDEK_;_YSSFSSVNKYGK(bi)HGDEK_;_YSSFSSVNKYGK(bi)HGDEK_;_YSSFSSVNKYGK(bi)HGDEK_;_YSSFSSVNKYGK(bi)HGDEK_;_YSSFSSVNKYGK(bi)HGDEK_;_YSSFSSVNKYGK(bi)HGDEK_;_YSSFSSVNKYGK(bi)HGDEK_;_YSSFSSVNKYGK(bi)HGDEK_;_YSSFSSVNKYGK(b…	YSSFSSVNK(0.05)YGK(0.95)HGDEK(0.001);YSSFSSVNK(0.011)YGK(0.954)HGDEK(0.035);YSSFSSVNKYGK(1)HGDEK;YSSFSSVNK(0.058)YGK(0.941)HGDEK;YSSFSSVNK(0.011)YGK(0.93)HGDEK(0.059);YSSFSSVNKYGK(0.999)HGDEK;YSSFSSVNK(0.002)YGK(0.998)HGDEK(0.001);YSSFSSVNK(0.037)YGK(0.866)HGDEK(0.098);YSSFSSVNK(0.083)YGK(0.911)HGDEK(0.005);YSSFSSVNK(0.002)YGK(0.993)HGDEK(0.004);YSSFSSVNK(0.018)YGK(0.982)HGDEK;YSSFSSVNK(0.065)YGK…	YSSFSSVNK(-12.81)YGK(12.81)HGDEK(-32.74);YSSFSSVNK(-19.44)YGK(14.35)HGDEK(-14.35);YSSFSSVNK(-36.68)YGK(36.68)HGDEK(-46.75);YSSFSSVNK(-12.08)YGK(12.08)HGDEK(-34.63);YSSFSSVNK(-19.35)YGK(11.95)HGDEK(-11.95);YSSFSSVNK(-37.77)YGK(33.14)HGDEK(-33.14);YSSFSSVNK(-28.09)YGK(28.09)HGDEK(-32.07);YSSFSSVNK(-13.74)YGK(9.48)HGDEK(-9.48);YSSFSSVNK(-10.38)YGK(10.38)HGDEK(-22.36);YSSFSSVNK(-26.59)YGK(23.54)HGDEK…	Y(0.001)S(0.041)S(0.954)FS(0.004)S(0.001)VNKYGKHGDEK;Y(0.006)S(0.053)S(0.614)FS(0.272)S(0.055)VNKYGKHGDEK;Y(0.001)S(0.006)S(0.845)FS(0.128)S(0.022)VNKYGKHGDEK;Y(0.023)S(0.029)S(0.916)FS(0.029)S(0.004)VNKYGKHGDEK;Y(0.023)S(0.16)S(0.759)FS(0.529)S(0.529)VNKYGKHGDEK;Y(0.48)S(0.144)S(0.458)FS(0.459)S(0.459)VNKYGKHGDEK;Y(0.001)S(0.001)S(0.412)FS(0.326)S(0.259)VNKYGKHGDEK	Y(-30.91)S(-13.7)S(13.7)FS(-24.13)S(-30.91)VNKY(-75.71)GKHGDEK;Y(-19.78)S(-10.66)S(3.54)FS(-3.54)S(-10.57)VNKY(-53.9)GKHGDEK;Y(-30.74)S(-21.62)S(8.24)FS(-8.24)S(-16)VNKY(-69.57)GKHGDEK;Y(-15.99)S(-15.06)S(15.06)FS(-15.06)S(-24.38)VNKY(-65.1)GKHGDEK;Y(-15.83)S(-7.09)S(7.09)FS(0)S(0)VNKY(-36.02)GKHGDEK;Y(0)S(-4.33)S(0)FS(0)S(0)VNKY(-47.87)GKHGDEK;Y(-25.42)S(-24.61)S(1.01)FS(-1.01)S(-2)VNKY(-37.5)GK…	_YSSFSSVNKYGK(bi)HGDEK_;_YSS(ph)FSSVNKYGK(bi)HGDEK_;_YSS(ph)FS(ph)SVNKYGK(bi)HGDEK_;_Y(ph)SS(ph)FSSVNKYGK(bi)HGDEK_;_YSSFSSVNK(bi)YGK(bi)HGDEK_;_YSS(ph)FSSVNK(bi)YGK(bi)HGDEK_
PF3D7_0202000	P. falciparum	knob-associated histidine-rich protein				27.604	27.5463	26.558	29.1937	28.8593	28.3452							2 Biotin (K)	0	2			1941100000	2.29e-16	161.08	137.85	62	NaN	3	2960.33	19.599	YSSFSSVNKYGKHGDEKHHSSK	117	0.99959	84.66	35.1012	+	NaN	NaN	NaN		343	364	_YSSFSSVNKYGK(bi)HGDEKHHSSK_;_YSSFSSVNKYGK(bi)HGDEKHHSSK_;_YSSFSSVNKYGK(bi)HGDEKHHSSK_;_YSSFSSVNKYGK(bi)HGDEKHHSSK_;_YSSFSSVNKYGK(bi)HGDEKHHSSK_;_YSSFSSVNKYGK(bi)HGDEKHHSSK_;_YSSFSSVNKYGK(bi)HGDEKHHSSK_;_YSSFSSVNKYGK(bi)HGDEKHHSSK_;_YSSFSSVNKYGK(bi)HGDEKHHSSK_;_YSSFSSVNKYGKHGDEK(bi)HHSSK_;_YSSFSSVNKYGK(bi)HGDEKHHSSK_;_YSSFSSVNKYGK(bi)HGDEKHHSSK_;_YSSFSSVNKYGK(bi)HGDEKHHSSK_;_YSSFSSVNKYGK(bi)HGDEK…	YSSFSSVNK(0.316)YGK(0.683)HGDEK(0.001)HHSSK;YSSFSSVNK(0.183)YGK(0.794)HGDEK(0.022)HHSSK(0.001);YSSFSSVNK(0.032)YGK(0.644)HGDEK(0.324)HHSSK;YSSFSSVNK(0.001)YGK(0.996)HGDEK(0.003)HHSSK;YSSFSSVNK(0.023)YGK(0.975)HGDEK(0.002)HHSSK;YSSFSSVNK(0.016)YGK(0.982)HGDEK(0.002)HHSSK;YSSFSSVNK(0.248)YGK(0.745)HGDEK(0.006)HHSSK;YSSFSSVNK(0.068)YGK(0.931)HGDEK(0.001)HHSSK;YSSFSSVNK(0.013)YGK(0.885)HGDEK(0.1)HHSS…	YSSFSSVNK(-3.34)YGK(3.34)HGDEK(-30.04)HHSSK(-50.96);YSSFSSVNK(-6.38)YGK(6.38)HGDEK(-15.58)HHSSK(-29.48);YSSFSSVNK(-13.06)YGK(2.98)HGDEK(-2.98)HHSSK(-37.36);YSSFSSVNK(-29.31)YGK(25.99)HGDEK(-25.99)HHSSK(-62.55);YSSFSSVNK(-16.2)YGK(16.2)HGDEK(-27.03)HHSSK(-45.54);YSSFSSVNK(-17.95)YGK(17.95)HGDEK(-26.39)HHSSK(-62.14);YSSFSSVNK(-4.77)YGK(4.77)HGDEK(-20.95)HHSSK(-33.44);YSSFSSVNK(-11.35)YGK(11.35)HGDE…	Y(0.044)S(0.053)S(0.836)FS(0.053)S(0.013)VNKYGKHGDEKHHSSK;Y(0.008)S(0.018)S(0.961)FS(0.01)S(0.002)VNKYGKHGDEKHHSSK;Y(0.004)S(0.038)S(0.953)FS(0.004)S(0.001)VNKYGKHGDEKHHSSK;Y(0.005)S(0.006)S(0.786)FS(0.17)S(0.032)VNKY(0.001)GKHGDEKHHSSK;Y(0.049)S(0.055)S(0.787)FS(0.5)S(0.5)VNKY(0.108)GKHGDEKHHSSK;Y(0.029)S(0.05)S(0.879)FS(0.337)S(0.703)VNKY(0.002)GKHGDEKHHSSK;Y(0.065)S(0.075)S(0.773)FS(0.543)S(0.…	Y(-12.82)S(-11.97)S(11.97)FS(-11.97)S(-18.09)VNKY(-44.35)GKHGDEKHHS(-72.06)S(-74.42)K;Y(-20.59)S(-17.25)S(17.25)FS(-19.66)S(-26.12)VNKY(-54.15)GKHGDEKHHS(-85.47)S(-87.9)K;Y(-24.3)S(-14.02)S(14.02)FS(-23.53)S(-30.42)VNKY(-54.64)GKHGDEKHHS(-85.03)S(-85.38)K;Y(-21.94)S(-21.18)S(6.7)FS(-6.7)S(-14.07)VNKY(-30.09)GKHGDEKHHS(-74.15)S(-76.87)K;Y(-13.15)S(-12.51)S(6.03)FS(0)S(0)VNKY(-7.4)GKHGDEKHHS(-53.72…	_YSSFSSVNKYGK(bi)HGDEKHHSSK_;_YSSFSSVNKYGKHGDEK(bi)HHSSK_;_YSS(ph)FSSVNKYGK(bi)HGDEKHHSSK_;_YSS(ph)FS(ph)SVNK(bi)YGKHGDEKHHSSK_;_YSS(ph)FSS(ph)VNKYGK(bi)HGDEKHHSSK_;_YSS(ph)FS(ph)SVNKYGK(bi)HGDEKHHSSK_;_YSSFSSVNK(bi)YGKHGDEK(bi)HHSSK_;_YSSFSSVNK(bi)YGK(bi)HGDEKHHSSK_;_YSSFSSVNKYGK(bi)HGDEK(bi)HHSSK_;_YSSFSSVNKYGK(bi)HGDEKHHSSK(bi)_;_YSS(ph)FSSVNKYGK(bi)HGDEK(bi)HHSSK_;_YSS(ph)FSSVNK(bi)YGK(bi)HGD…
PF3D7_0730900	P. falciparum	EMP1-trafficking protein										24.3712	24.6096	24.0772	24.5225	24.3844	24.5285	2 Biotin (K)	0	2			135100000	7.83e-59	264.01	206.39	23	NaN	2	2577.24	33.22	YVGVLKNNSDGGINKDFGTK	222	NaN	NaN	NaN		NaN	NaN	NaN		1011	1030	_YVGVLK(bi)NNSDGGINKDFGTK_;_YVGVLK(bi)NNSDGGINKDFGTK_;_YVGVLK(bi)NNSDGGINKDFGTK_;_YVGVLK(bi)NNSDGGINKDFGTK_;_YVGVLK(bi)NNSDGGINKDFGTK_;_YVGVLKNNSDGGINK(bi)DFGTK_;_YVGVLK(bi)NNSDGGINKDFGTK_;_YVGVLK(bi)NNSDGGINKDFGTK_;_YVGVLKNNSDGGINK(bi)DFGTK_;_YVGVLK(bi)NNSDGGINKDFGTK_;_YVGVLK(bi)NNSDGGINKDFGTK_;_YVGVLK(bi)NNSDGGINKDFGTK_;_YVGVLK(bi)NNSDGGINKDFGTK_;_YVGVLK(bi)NNSDGGINKDFGTK_;_YVGVLK(bi)NNSDGGINKD…	YVGVLK(1)NNSDGGINKDFGTK;YVGVLK(1)NNSDGGINKDFGTK;YVGVLK(1)NNSDGGINKDFGTK;YVGVLK(1)NNSDGGINKDFGTK;YVGVLK(1)NNSDGGINKDFGTK;YVGVLKNNSDGGINK(1)DFGTK;YVGVLK(1)NNSDGGINKDFGTK;YVGVLK(1)NNSDGGINKDFGTK;YVGVLKNNSDGGINK(0.998)DFGTK(0.002);YVGVLK(1)NNSDGGINKDFGTK;YVGVLK(1)NNSDGGINKDFGTK;YVGVLK(1)NNSDGGINKDFGTK;YVGVLK(1)NNSDGGINKDFGTK;YVGVLK(1)NNSDGGINKDFGTK;YVGVLK(1)NNSDGGINKDFGTK;YVGVLK(1)NNSDGGINKDFGTK;YVGV…	YVGVLK(140.96)NNSDGGINK(-140.96)DFGTK(-161.29);YVGVLK(59.18)NNSDGGINK(-59.18)DFGTK(-64.46);YVGVLK(108.65)NNSDGGINK(-108.65)DFGTK(-133.99);YVGVLK(52.94)NNSDGGINK(-52.94)DFGTK(-67.38);YVGVLK(146.76)NNSDGGINK(-146.76)DFGTK(-152.7);YVGVLK(-98.24)NNSDGGINK(41.53)DFGTK(-41.53);YVGVLK(126.69)NNSDGGINK(-126.69)DFGTK(-135.58);YVGVLK(78.83)NNSDGGINK(-78.83)DFGTK(-101.13);YVGVLK(-78.19)NNSDGGINK(27.78)DFGTK…			_YVGVLK(bi)NNSDGGINKDFGTK_;_YVGVLKNNSDGGINK(bi)DFGTK_;_YVGVLK(bi)NNSDGGINK(bi)DFGTK_
PF3D7_0730900	P. falciparum	EMP1-trafficking protein										22.7122			21.8742	21.5505		2 Biotin (K)	0	2			13787000	9.23e-31	189.84	150.59	8	3	3	3417.71	35.432	YVGVLKNNSDGGINKDFGTKGSVINEIK	222	1	189.84	89.1391	+	NaN	NaN	NaN		1011	1038	_YVGVLK(bi)NNSDGGINKDFGTK(bi)GSVINEIK_;_YVGVLK(bi)NNSDGGINKDFGTK(bi)GSVINEIK_;_YVGVLK(bi)NNSDGGINKDFGTK(bi)GSVINEIK_;_YVGVLK(bi)NNSDGGINKDFGTK(bi)GSVINEIK_;_YVGVLK(bi)NNSDGGINKDFGTK(bi)GSVINEIK_	YVGVLK(1)NNSDGGINK(0.001)DFGTK(0.999)GSVINEIK;YVGVLK(1)NNSDGGINK(0.012)DFGTK(0.988)GSVINEIK;YVGVLK(1)NNSDGGINKDFGTK(1)GSVINEIK;YVGVLK(1)NNSDGGINKDFGTK(1)GSVINEIK;YVGVLK(1)NNSDGGINKDFGTK(1)GSVINEIK	YVGVLK(38.42)NNSDGGINK(-33.45)DFGTK(33.06)GSVINEIK(-33.06);YVGVLK(36.12)NNSDGGINK(-19.43)DFGTK(19.43)GSVINEIK(-35.5);YVGVLK(42.63)NNSDGGINK(-42.63)DFGTK(36.68)GSVINEIK(-36.68);YVGVLK(55.49)NNSDGGINK(-48.06)DFGTK(45.52)GSVINEIK(-45.52);YVGVLK(89.14)NNSDGGINK(-43.58)DFGTK(43.58)GSVINEIK(-51.93)			_YVGVLK(bi)NNSDGGINKDFGTK(bi)GSVINEIK_
						25.1581	25.5909	23.5237	25.7735	26.1467	24.9431							2 Biotin (K)	0	2	+		263950000	0.02948	51.876	13.155	1	4	3	3205.66	36.787	KYIIKHIESIDAELPLMDLKQEK	531	NaN	NaN	NaN		NaN	NaN	NaN
													23.1998		21.8632			2 Biotin (K)	0	2	+		13449000	0.00092113	80.382	14.966	1	4	3	3132.45	29.299	KYHSYPKNNMYSYTNKSLESVK	527	NaN	NaN	NaN		NaN	NaN	NaN
Q13442	Homo sapiens			28 kDa heat- and acid-stable phosphoprotein	PDAP1													2 Biotin (K)	0	2			0	0.010875	105.63	50.433	1	3	2	2191.07	29.741	MHLAGKTEQAKADLAR	479	NaN	NaN	NaN		NaN	NaN	NaN
PF3D7_0113000	P. falciparum	glutamic acid-rich protein GARP	GARP															2 Biotin (K)	0	2			0	3.4039e-05	193.51	106.7	1	2	2	1868.92	29.979	KMAKIEEAELQK	106	NaN	NaN	NaN		NaN	NaN	NaN
PF3D7_0113000	P. falciparum	glutamic acid-rich protein GARP	GARP															2 Biotin (K)	0	2			0	0.011664	102.43	66.808	2	3	2	2693.39	41.929	SKVEEKNLSIQEQLIGTIGR	106	NaN	NaN	NaN		NaN	NaN	NaN
PF3D7_0202000	P. falciparum	knob-associated histidine-rich protein	KAHRP															2 Biotin (K)	0	2			0	1.5146e-09	153.25	115.04	4	3	3	2833.3	20.018	GQCAAEGATKGATKEASTSKEATK	117	NaN	NaN	NaN		NaN	NaN	NaN
PF3D7_0202000	P. falciparum	knob-associated histidine-rich protein	KAHRP															2 Biotin (K)	0	2			0	0.0042861	101.76	35.858	2	3	3	3000.39	18.869	VDSTSADNKSTNAATPGAKDKTQGGK	117	NaN	NaN	NaN		NaN	NaN	NaN
PF3D7_0730900	P. falciparum	EMP1-trafficking protein	PTP4															2 Biotin (K)	0	2			0	7.9648e-08	157.01	119.72	1	3	3	3048.37	24.707	FNDTTDKMSQEKQDNQKEVGVR	222	NaN	NaN	NaN		NaN	NaN	NaN
PF3D7_0730900	P. falciparum	EMP1-trafficking protein	PTP4															2 Biotin (K)	0	2			0	1.418e-07	191.63	127.53	2	2	2	2010.97	34.837	FSNTGKKFVQEFK	222	NaN	NaN	NaN		NaN	NaN	NaN
PF3D7_0730900	P. falciparum	EMP1-trafficking protein	PTP4															2 Biotin (K)	0	2			0	5.8325e-06	154.48	103.61	3	3	3	2570.21	21.405	IEKDANSGSELKNTNNKEK	222	NaN	NaN	NaN		NaN	NaN	NaN
PF3D7_0730900	P. falciparum	EMP1-trafficking protein	PTP4															2 Biotin (K)	0	2			0	6.871e-18	219.95	95.57	5	2	2	2121.03	34.477	KEISTPKNYVSEFK	222	NaN	NaN	NaN		NaN	NaN	NaN
PF3D7_0730900	P. falciparum	EMP1-trafficking protein	PTP4															2 Biotin (K)	0	2			0	4.0271e-16	177.09	122.22	3	3	3	3118.39	30.878	NYVSEFKNNDDEDLKKESYTTK	222	NaN	NaN	NaN		NaN	NaN	NaN
PF3D7_0731300	P. falciparum	Plasmodium exported protein (PHISTb), unknown function	PfG174															2 Biotin (K)	0	2			0	0.042198	127.76	6.0321	1	2	2	1440.73	27.949	KILKDMNK	224	NaN	NaN	NaN		NaN	NaN	NaN
PF3D7_0801000	P. falciparum	Plasmodium exported protein (PHISTc)	N/A															2 Biotin (K)	0	2			0	3.9932e-05	147.53	98.469	1	3	3	2504.22	28.671	NTSVSKSCDIIKPSKFNK	226	NaN	NaN	NaN		NaN	NaN	NaN
PF3D7_1102500	P. falciparum	gametocyte exported protein 2	GEXP02															2 Biotin (K)	0	2			0	0.0051159	112.82	60.805	1	3	2	2529.22	38.145	SKVVGIKEIDEEGMESISK	310	NaN	NaN	NaN		NaN	NaN	NaN
PF3D7_1200700	P. falciparum	acyl-CoA synthetase	ACS7															2 Biotin (K)	0	2			0	4.7186e-06	146.97	79.557	1	3	3	2680.36	29.053	KSVLKSENVDVSKEVESPVR	347	NaN	NaN	NaN		NaN	NaN	NaN
PF3D7_0730900	P. falciparum	EMP1-trafficking protein										20.708						2 Biotin (K);2 Oxidation (M)	0	2			1712900	0.013686	77.575	41.409	1	4	3	3258.45	22.322	NYKHLTDEENKVEKEMSIHDGMK	222	1	116.27	83.319	+	NaN	NaN	NaN		1162	1184	_NYK(bi)HLTDEENKVEKEMSIHDGM(ox)K_;_NYK(bi)HLTDEENKVEKEMSIHDGM(ox)K_;_NYK(bi)HLTDEENKVEKEMSIHDGM(ox)K_;_NYK(bi)HLTDEENKVEKEMSIHDGM(ox)K_;_NYK(bi)HLTDEENKVEKEMSIHDGM(ox)K_;_NYK(bi)HLTDEENKVEKEM(ox)SIHDGMK_;_NYK(bi)HLTDEENKVEKEM(ox)SIHDGMK_;_NYK(bi)HLTDEENKVEKEMSIHDGM(ox)K_;_NYK(bi)HLTDEENKVEKEMSIHDGM(ox)K_;_NYK(bi)HLTDEENKVEKEMSIHDGM(ox)K_;_NYK(bi)HLTDEENKVEKEM(ox)SIHDGMK_;_NYK(bi)HLTDEENKVEKEMSIHD…	NYK(1)HLTDEENKVEKEMSIHDGMK;NYK(0.999)HLTDEENK(0.001)VEK(0.001)EMSIHDGMK;NYK(1)HLTDEENKVEKEMSIHDGMK;NYK(1)HLTDEENKVEKEMSIHDGMK;NYK(0.999)HLTDEENK(0.001)VEKEMSIHDGMK;NYK(1)HLTDEENKVEKEMSIHDGMK;NYK(1)HLTDEENKVEKEMSIHDGMK;NYK(1)HLTDEENKVEKEMSIHDGMK;NYK(1)HLTDEENKVEKEMSIHDGMK;NYK(1)HLTDEENKVEKEMSIHDGMK;NYK(1)HLTDEENKVEKEMSIHDGMK;NYK(0.999)HLTDEENK(0.001)VEKEMSIHDGMK;NYK(1)HLTDEENKVEKEMSIHDGMK;NYK(0.99…	NYK(53.87)HLTDEENK(-53.87)VEK(-78.28)EMSIHDGMK(-97.48);NYK(32.27)HLTDEENK(-32.27)VEK(-32.27)EMSIHDGMK(-49.45);NYK(49.46)HLTDEENK(-49.46)VEK(-54.76)EMSIHDGMK(-74.56);NYK(37.64)HLTDEENK(-37.64)VEK(-44.51)EMSIHDGMK(-67.72);NYK(29.34)HLTDEENK(-29.34)VEK(-46.9)EMSIHDGMK(-68.82);NYK(59.76)HLTDEENK(-59.76)VEK(-63.03)EMSIHDGMK(-79.93);NYK(51.21)HLTDEENK(-51.21)VEK(-55.49)EMSIHDGMK(-60.05);NYK(92.29)HLTDE…			_NYK(bi)HLTDEENKVEKEMSIHDGM(ox)K_;_NYK(bi)HLTDEENKVEKEM(ox)SIHDGMK_;_NYK(bi)HLTDEENKVEKEMSIHDGMK_;_NYKHLTDEENKVEK(bi)EMSIHDGMK_;_NYKHLTDEENK(bi)VEKEMSIHDGMK_;_NYK(bi)HLTDEENKVEKEM(ox)SIHDGM(ox)K_;_NYK(bi)HLTDEENKVEK(bi)EM(ox)SIHDGM(ox)K_;_NYK(bi)HLTDEENKVEK(bi)EMSIHDGMK_;_NYK(bi)HLTDEENK(bi)VEKEMSIHDGMK_;_NYK(bi)HLTDEENK(bi)VEKEMSIHDGM(ox)K_
P04632	Homo sapiens			Calpain small subunit 1	CAPNS1													2 Biotin (K);2 Oxidation (M)	0	2			0	0.042173	54.261	7.4433	1	3	2	3606.65	29.063	SMVAVMDSDTTGKLGFEEFKYLWNNIK	33	NaN	NaN	NaN		NaN	NaN	NaN
PF3D7_0310200	P. falciparum	phd finger protein, putative	N/A															2 Biotin (K);2 Oxidation (M)	0	2			0	0.033305	79.283	34.671	2	NaN	3	1988.97	26.781	NMNTNVLMKKKGK	138	NaN	NaN	NaN		NaN	NaN	NaN
PF3D7_1420100	P. falciparum	conserved Plasmodium protein, unknown function	N/A															2 Biotin (K);2 Oxidation (M)	0	2			0	0.042042	59.294	19.108	1	3	2	2060.92	39.973	KHEPTMDMYKIGK	431	NaN	NaN	NaN		NaN	NaN	NaN
P42285	Homo sapiens			Superkiller viralicidic activity 2-like 2	SKIV2L2													2 Biotin (K);2 Oxidation (M);2 Phospho (STY)	2	2			0	0.0034014	106.87	39.018	1	3	2	2858.25	29.392	MIMERNFQPVIIFSFSKK	78	NaN	NaN	NaN		NaN	NaN	NaN
Q96DL1	Homo sapiens			NXPE family member 2	NXPE2	21.7021	22.2601		21.9342	21.9316	22.342							2 Biotin (K);2 Phospho (STY)	2	2			21758000	1.96e-05	106.28	28.7	8	4	1	3050.57	36.972	KLLLMLTFILIFWIIYLASK	503	1	106.28	106.275	+	1	106.28	79.6808	+	21	40	_K(bi)LLLMLTFILIFWIIY(ph)LAS(ph)K(bi)_;_K(bi)LLLMLTFILIFWIIY(ph)LAS(ph)K(bi)_;_K(bi)LLLMLTFILIFWIIY(ph)LAS(ph)K(bi)_;_K(bi)LLLMLTFILIFWIIY(ph)LAS(ph)K(bi)_;_K(bi)LLLMLTFILIFWIIY(ph)LAS(ph)K(bi)_	K(1)LLLMLTFILIFWIIYLASK(1);K(1)LLLMLTFILIFWIIYLASK(1);K(1)LLLMLTFILIFWIIYLASK(1);K(1)LLLMLTFILIFWIIYLASK(1)	K(90.42)LLLMLTFILIFWIIYLASK(90.42);K(73.14)LLLMLTFILIFWIIYLASK(73.14);K(96.45)LLLMLTFILIFWIIYLASK(96.45);K(106.28)LLLMLTFILIFWIIYLASK(106.28)	KLLLMLTFILIFWIIY(1)LAS(1)K;KLLLMLTFILIFWIIY(1)LAS(1)K;KLLLMLTFILIFWIIY(1)LAS(1)K;KLLLMLTFILIFWIIY(1)LAS(1)K	KLLLMLT(-65.01)FILIFWIIY(69.15)LAS(65.01)K;KLLLMLT(-47.26)FILIFWIIY(47.26)LAS(47.73)K;KLLLMLT(-66.84)FILIFWIIY(66.84)LAS(67.28)K;KLLLMLT(-79.44)FILIFWIIY(79.44)LAS(79.92)K	_K(bi)LLLMLTFILIFWIIY(ph)LAS(ph)K(bi)_
PF3D7_0930300	P. falciparum	merozoite surface protein 1													23.5045		24.2021	2 Biotin (K);2 Phospho (STY)	2	2			31207000	0.040299	43.501	15.676	1	4	3	4423.08	31.116	LSFLSSGLHHLITELKEVIKNKNYTGNSPSENNK	268	NaN	NaN	NaN		NaN	NaN	NaN		1193	1226	_LS(ph)FLSSGLHHLITELKEVIKNK(bi)NYT(ph)GNSPSENNK(bi)_;_LS(ph)FLSSGLHHLITELKEVIKNK(bi)NYT(ph)GNSPSENNK(bi)_	LSFLSSGLHHLITELK(0.007)EVIK(0.238)NK(0.766)NYTGNSPSENNK(0.989)	LSFLSSGLHHLITELK(-22.65)EVIK(-5.32)NK(5.32)NYTGNSPSENNK(22.65)	LS(0.448)FLS(0.41)S(0.126)GLHHLIT(0.017)ELKEVIKNKNY(0.466)T(0.509)GNS(0.011)PS(0.011)ENNK	LS(0.4)FLS(-0.4)S(-5.68)GLHHLIT(-15.08)ELKEVIKNKNY(-0.4)T(0.4)GNS(-18.42)PS(-18.42)ENNK	_LS(ph)FLSSGLHHLITELKEVIKNK(bi)NYT(ph)GNSPSENNK(bi)_
PF3D7_0202000	P. falciparum	knob-associated histidine-rich protein				21.6961	21.5314	21.1664										2 Biotin (K);2 Phospho (STY)	2	2			8782300	0.010591	61.959	34.417	4	4	3	3120.27	22.909	YSSFSSVNKYGKHGDEKHHSSK	117	0.99959	84.66	35.1012	+	NaN	NaN	NaN		343	364	_YSSFSSVNKYGK(bi)HGDEKHHSSK_;_YSSFSSVNKYGK(bi)HGDEKHHSSK_;_YSSFSSVNKYGK(bi)HGDEKHHSSK_;_YSSFSSVNKYGK(bi)HGDEKHHSSK_;_YSSFSSVNKYGK(bi)HGDEKHHSSK_;_YSSFSSVNKYGK(bi)HGDEKHHSSK_;_YSSFSSVNKYGK(bi)HGDEKHHSSK_;_YSSFSSVNKYGK(bi)HGDEKHHSSK_;_YSSFSSVNKYGK(bi)HGDEKHHSSK_;_YSSFSSVNKYGKHGDEK(bi)HHSSK_;_YSSFSSVNKYGK(bi)HGDEKHHSSK_;_YSSFSSVNKYGK(bi)HGDEKHHSSK_;_YSSFSSVNKYGK(bi)HGDEKHHSSK_;_YSSFSSVNKYGK(bi)HGDEK…	YSSFSSVNK(0.316)YGK(0.683)HGDEK(0.001)HHSSK;YSSFSSVNK(0.183)YGK(0.794)HGDEK(0.022)HHSSK(0.001);YSSFSSVNK(0.032)YGK(0.644)HGDEK(0.324)HHSSK;YSSFSSVNK(0.001)YGK(0.996)HGDEK(0.003)HHSSK;YSSFSSVNK(0.023)YGK(0.975)HGDEK(0.002)HHSSK;YSSFSSVNK(0.016)YGK(0.982)HGDEK(0.002)HHSSK;YSSFSSVNK(0.248)YGK(0.745)HGDEK(0.006)HHSSK;YSSFSSVNK(0.068)YGK(0.931)HGDEK(0.001)HHSSK;YSSFSSVNK(0.013)YGK(0.885)HGDEK(0.1)HHSS…	YSSFSSVNK(-3.34)YGK(3.34)HGDEK(-30.04)HHSSK(-50.96);YSSFSSVNK(-6.38)YGK(6.38)HGDEK(-15.58)HHSSK(-29.48);YSSFSSVNK(-13.06)YGK(2.98)HGDEK(-2.98)HHSSK(-37.36);YSSFSSVNK(-29.31)YGK(25.99)HGDEK(-25.99)HHSSK(-62.55);YSSFSSVNK(-16.2)YGK(16.2)HGDEK(-27.03)HHSSK(-45.54);YSSFSSVNK(-17.95)YGK(17.95)HGDEK(-26.39)HHSSK(-62.14);YSSFSSVNK(-4.77)YGK(4.77)HGDEK(-20.95)HHSSK(-33.44);YSSFSSVNK(-11.35)YGK(11.35)HGDE…	Y(0.044)S(0.053)S(0.836)FS(0.053)S(0.013)VNKYGKHGDEKHHSSK;Y(0.008)S(0.018)S(0.961)FS(0.01)S(0.002)VNKYGKHGDEKHHSSK;Y(0.004)S(0.038)S(0.953)FS(0.004)S(0.001)VNKYGKHGDEKHHSSK;Y(0.005)S(0.006)S(0.786)FS(0.17)S(0.032)VNKY(0.001)GKHGDEKHHSSK;Y(0.049)S(0.055)S(0.787)FS(0.5)S(0.5)VNKY(0.108)GKHGDEKHHSSK;Y(0.029)S(0.05)S(0.879)FS(0.337)S(0.703)VNKY(0.002)GKHGDEKHHSSK;Y(0.065)S(0.075)S(0.773)FS(0.543)S(0.…	Y(-12.82)S(-11.97)S(11.97)FS(-11.97)S(-18.09)VNKY(-44.35)GKHGDEKHHS(-72.06)S(-74.42)K;Y(-20.59)S(-17.25)S(17.25)FS(-19.66)S(-26.12)VNKY(-54.15)GKHGDEKHHS(-85.47)S(-87.9)K;Y(-24.3)S(-14.02)S(14.02)FS(-23.53)S(-30.42)VNKY(-54.64)GKHGDEKHHS(-85.03)S(-85.38)K;Y(-21.94)S(-21.18)S(6.7)FS(-6.7)S(-14.07)VNKY(-30.09)GKHGDEKHHS(-74.15)S(-76.87)K;Y(-13.15)S(-12.51)S(6.03)FS(0)S(0)VNKY(-7.4)GKHGDEKHHS(-53.72…	_YSSFSSVNKYGK(bi)HGDEKHHSSK_;_YSSFSSVNKYGKHGDEK(bi)HHSSK_;_YSS(ph)FSSVNKYGK(bi)HGDEKHHSSK_;_YSS(ph)FS(ph)SVNK(bi)YGKHGDEKHHSSK_;_YSS(ph)FSS(ph)VNKYGK(bi)HGDEKHHSSK_;_YSS(ph)FS(ph)SVNKYGK(bi)HGDEKHHSSK_;_YSSFSSVNK(bi)YGKHGDEK(bi)HHSSK_;_YSSFSSVNK(bi)YGK(bi)HGDEKHHSSK_;_YSSFSSVNKYGK(bi)HGDEK(bi)HHSSK_;_YSSFSSVNKYGK(bi)HGDEKHHSSK(bi)_;_YSS(ph)FSSVNKYGK(bi)HGDEK(bi)HHSSK_;_YSS(ph)FSSVNK(bi)YGK(bi)HGD…
PF3D7_1314200	P. falciparum	telomerase reverse transcriptase	TERT															2 Biotin (K);3 Phospho (STY)	3	2			0	0.028982	66.538	26.957	1	2	1	1903.66	38.94	EKSSSVGYDIK	381	NaN	NaN	NaN		NaN	NaN	NaN
O00178	Homo sapiens			GTP-binding protein 1	GTPBP1													2 Biotin (K);3 Phospho (STY);Oxidation (M)	3	2			0	0.02268	65.428	22.637	2	3	3	3648.66	27.231	TKAVGTITKLLQTTNNSPMNSKPQQIK	8	NaN	NaN	NaN		NaN	NaN	NaN
PF3D7_1217400	P. falciparum	conserved protein, unknown function	N/A															2 Biotin (K);3 Phospho (STY);Oxidation (M)	3	2			0	0.0025013	95.954	14.1	1	3	2	3119.38	30.792	MIILLKGTNYMDLQKLNYIK	359	NaN	NaN	NaN		NaN	NaN	NaN
PF3D7_1462400	P. falciparum	conserved Plasmodium protein, unknown function	N/A															2 Biotin (K);3 Phospho (STY);Oxidation (M)	3	2			0	0.039414	53.033	13.646	1	3	1	3324.27	26.407	MNIVNNMNSKNNNFVNYTMNIK	459	NaN	NaN	NaN		NaN	NaN	NaN
PF3D7_0731100	P. falciparum	EMP1-trafficking protein	PTP2															2 Biotin (K);4 Phospho (STY)	4	2			0	0.027441	66.826	31.694	1	2	1	2772.9	39.65	QDENSGKQSNVYNNNYK	223	NaN	NaN	NaN		NaN	NaN	NaN
PF3D7_1206300	P. falciparum	conserved Plasmodium protein, unknown function	N/A															2 Biotin (K);4 Phospho (STY)	4	2			0	0.041199	44.612	6.787	1	2	2	1999.65	42.339	KNTKVCSTYK	355	NaN	NaN	NaN		NaN	NaN	NaN
P11171	Homo sapiens			Protein 4.1	EPB41					22.837								2 Biotin (K);Oxidation (M)	0	2			7492200	0.0092354	90.453	27.592	1	3	3	2699.23	29.752	KNFMESVPEPRPSEWDKR	46	1	54.073	54.0732	+	NaN	NaN	NaN		690	707	_K(bi)NFM(ox)ESVPEPRPSEWDKR_;_K(bi)NFM(ox)ESVPEPRPSEWDKR_;_K(bi)NFM(ox)ESVPEPRPSEWDKR_;_K(bi)NFM(ox)ESVPEPRPSEWDKR_;_K(bi)NFM(ox)ESVPEPRPSEWDKR_;_K(bi)NFM(ox)ESVPEPRPSEWDKR_;_K(bi)NFM(ox)ESVPEPRPSEWDKR_;_K(bi)NFM(ox)ESVPEPRPSEWDKR_;_K(bi)NFM(ox)ESVPEPRPSEWDKR_;_K(bi)NFM(ox)ESVPEPRPSEWDKR_;_K(bi)NFM(ox)ESVPEPRPSEWDKR_;_K(bi)NFM(ox)ESVPEPRPSEWDKR_;_K(bi)NFM(ox)ESVPEPRPSEWDKR_;_K(bi)NFM(ox)ESVPEPRPS…	K(1)NFMESVPEPRPSEWDKR;K(1)NFMESVPEPRPSEWDKR;K(1)NFMESVPEPRPSEWDKR;K(1)NFMESVPEPRPSEWDKR;K(1)NFMESVPEPRPSEWDKR;K(1)NFMESVPEPRPSEWDKR;K(1)NFMESVPEPRPSEWDKR;K(1)NFMESVPEPRPSEWDKR;K(1)NFMESVPEPRPSEWDKR;K(1)NFMESVPEPRPSEWDKR;K(1)NFMESVPEPRPSEWDKR;K(1)NFMESVPEPRPSEWDKR;K(1)NFMESVPEPRPSEWDKR;K(1)NFMESVPEPRPSEWDKR;K(1)NFMESVPEPRPSEWDKR;K(1)NFMESVPEPRPSEWDKR;K(1)NFMESVPEPRPSEWDKR;K(1)NFMESVPEPRPSEWDKR;K(1…	K(83.66)NFMESVPEPRPSEWDK(-83.66)R;K(113.6)NFMESVPEPRPSEWDK(-113.6)R;K(74.65)NFMESVPEPRPSEWDK(-74.65)R;K(108.37)NFMESVPEPRPSEWDK(-108.37)R;K(78.02)NFMESVPEPRPSEWDK(-78.02)R;K(106.17)NFMESVPEPRPSEWDK(-106.17)R;K(72.35)NFMESVPEPRPSEWDK(-72.35)R;K(114.98)NFMESVPEPRPSEWDK(-114.98)R;K(45.16)NFMESVPEPRPSEWDK(-45.16)R;K(112.66)NFMESVPEPRPSEWDK(-112.66)R;K(84.13)NFMESVPEPRPSEWDK(-84.13)R;K(86.59)NFMESVPEP…			_K(bi)NFM(ox)ESVPEPRPSEWDKR_;_K(bi)NFMESVPEPRPSEWDKR_;_K(bi)NFM(ox)ESVPEPRPSEWDK(bi)R_
PF3D7_0730900	P. falciparum	EMP1-trafficking protein										20.2377	20.3091	20.1383	20.0156			2 Biotin (K);Oxidation (M)	0	2			4749600	0.0057623	96.435	51.836	1	3	2	2213.02	18.806	ASNYMHKNPNKVNTK	222	NaN	NaN	NaN		NaN	NaN	NaN		277	291	_ASNYMHKNPNK(bi)VNTK_;_ASNYMHK(bi)NPNKVNTK_;_ASNYMHK(bi)NPNKVNTK_;_ASNYMHKNPNK(bi)VNTK_;_ASNYMHK(bi)NPNKVNTK_;_ASNYMHKNPNK(bi)VNTK_;_ASNYMHK(bi)NPNKVNTK_;_ASNYMHK(bi)NPNKVNTK_;_ASNYMHKNPNK(bi)VNTK_;_ASNYMHK(bi)NPNKVNTK_;_ASNYMHK(bi)NPNKVNTK_;_ASNYMHKNPNK(bi)VNTK_;_ASNYMHK(bi)NPNKVNTK_;_ASNYMHK(bi)NPNKVNTK_;_ASNYMHKNPNK(bi)VNTK_;_ASNYMHK(bi)NPNKVNTK_;_ASNYMHK(bi)NPNKVNTK_;_ASNYMHKNPNK(bi)VNTK_;_AS…	ASNYMHK(0.09)NPNK(0.909)VNTK(0.001);ASNYMHK(0.957)NPNK(0.042)VNTK(0.001);ASNYMHK(0.999)NPNK(0.001)VNTK;ASNYMHKNPNK(0.989)VNTK(0.011);ASNYMHK(0.996)NPNK(0.003)VNTK;ASNYMHK(0.003)NPNK(0.993)VNTK(0.003);ASNYMHK(0.997)NPNK(0.003)VNTK;ASNYMHK(1)NPNKVNTK;ASNYMHK(0.13)NPNK(0.853)VNTK(0.017);ASNYMHK(0.999)NPNK(0.001)VNTK;ASNYMHK(0.993)NPNK(0.007)VNTK;ASNYMHKNPNK(1)VNTK;ASNYMHK(1)NPNKVNTK;ASNYMHK(0.999)NP…	ASNYMHK(-10.06)NPNK(10.06)VNTK(-28.51);ASNYMHK(13.57)NPNK(-13.57)VNTK(-28.7);ASNYMHK(30.32)NPNK(-30.32)VNTK(-46.38);ASNYMHK(-36.1)NPNK(19.54)VNTK(-19.54);ASNYMHK(24.74)NPNK(-24.74)VNTK(-37.58);ASNYMHK(-24.67)NPNK(24.67)VNTK(-24.67);ASNYMHK(24.69)NPNK(-24.69)VNTK(-48.29);ASNYMHK(48.34)NPNK(-48.34)VNTK(-56.24);ASNYMHK(-8.18)NPNK(8.18)VNTK(-17.06);ASNYMHK(32.06)NPNK(-32.06)VNTK(-43.98);ASNYMHK(21.4)…			_ASNYMHKNPNK(bi)VNTK_;_ASNYMHK(bi)NPNKVNTK_;_ASNYM(ox)HKNPNK(bi)VNTK_;_ASNYM(ox)HK(bi)NPNKVNTK_;_ASNYM(ox)HK(bi)NPNK(bi)VNTK_;_ASNYMHK(bi)NPNK(bi)VNTK_
PF3D7_0500800	P. falciparum	mature parasite-infected erythrocyte surface antigen					21.8998				21.5889							2 Biotin (K);Oxidation (M)	0	2			7067300	7.21e-17	187.04	130.24	6	3	3	2583.3	42.333	DKMIGKEVIIEEVKEEVK	159	1	147.84	120.615	+	NaN	NaN	NaN		1118	1135	_DK(bi)M(ox)IGKEVIIEEVKEEVK_;_DKMIGK(bi)EVIIEEVKEEVK_;_DKMIGK(bi)EVIIEEVKEEVK_;_DKMIGK(bi)EVIIEEVKEEVK_;_DKMIGK(bi)EVIIEEVKEEVK_;_DKMIGK(bi)EVIIEEVKEEVK_;_DKMIGK(bi)EVIIEEVKEEVK_;_DKMIGK(bi)EVIIEEVKEEVK_;_DK(bi)MIGKEVIIEEVKEEVK_;_DK(bi)M(ox)IGK(bi)EVIIEEVKEEVK_;_DK(bi)M(ox)IGK(bi)EVIIEEVKEEVK_;_DK(bi)M(ox)IGK(bi)EVIIEEVKEEVK_;_DK(bi)MIGK(bi)EVIIEEVKEEVK_;_DK(bi)MIGK(bi)EVIIEEVKEEVK_	DK(0.914)MIGK(0.086)EVIIEEVKEEVK;DK(0.001)MIGK(0.999)EVIIEEVKEEVK;DK(0.086)MIGK(0.914)EVIIEEVKEEVK;DK(0.056)MIGK(0.944)EVIIEEVKEEVK;DKMIGK(1)EVIIEEVKEEVK;DK(0.091)MIGK(0.909)EVIIEEVKEEVK;DK(0.109)MIGK(0.891)EVIIEEVKEEVK;DKMIGK(1)EVIIEEVKEEVK;DK(0.993)MIGK(0.007)EVIIEEVKEEVK;DK(1)MIGK(1)EVIIEEVKEEVK;DK(1)MIGK(1)EVIIEEVKEEVK;DK(1)MIGK(1)EVIIEEVKEEVK;DK(1)MIGK(1)EVIIEEVKEEVK	DK(10.28)MIGK(-10.28)EVIIEEVK(-84.99)EEVK(-94.68);DK(-30.44)MIGK(30.44)EVIIEEVK(-133.6)EEVK(-152.66);DK(-10.28)MIGK(10.28)EVIIEEVK(-74.54)EEVK(-73.82);DK(-12.25)MIGK(12.25)EVIIEEVK(-119.53)EEVK(-129.9);DK(-33.21)MIGK(33.21)EVIIEEVK(-109.6)EEVK(-110.4);DK(-10)MIGK(10)EVIIEEVK(-86.34)EEVK(-89.55);DK(-9.13)MIGK(9.13)EVIIEEVK(-113.75)EEVK(-129.47);DK(-45.81)MIGK(45.81)EVIIEEVK(-120.41)EEVK(-127.51);D…			_DK(bi)M(ox)IGKEVIIEEVKEEVK_;_DKMIGK(bi)EVIIEEVKEEVK_;_DK(bi)MIGKEVIIEEVKEEVK_;_DK(bi)M(ox)IGK(bi)EVIIEEVKEEVK_;_DK(bi)MIGK(bi)EVIIEEVKEEVK_
PF3D7_0730900	P. falciparum	EMP1-trafficking protein										21.5578	21.9425	21.8881	22.2565	22.1026	22.0033	2 Biotin (K);Oxidation (M)	0	2			24717000	3.05e-06	148.7	92.804	10	3	2	2262.99	22.972	EMSIHDGMKGQKYGSK	222	NaN	NaN	NaN		NaN	NaN	NaN		1176	1191	_EMSIHDGMKGQK(bi)YGSK_;_EMSIHDGMKGQK(bi)YGSK_;_EMSIHDGMKGQK(bi)YGSK_;_EMSIHDGM(ox)K(bi)GQK(bi)YGSK_;_EMSIHDGM(ox)K(bi)GQK(bi)YGSK_;_EM(ox)SIHDGMK(bi)GQK(bi)YGSK_;_EMSIHDGM(ox)K(bi)GQK(bi)YGSK_;_EMSIHDGM(ox)K(bi)GQK(bi)YGSK_;_EMSIHDGM(ox)K(bi)GQK(bi)YGSK_;_EMSIHDGMK(bi)GQK(bi)YGSK_;_EMSIHDGMK(bi)GQK(bi)YGSK_;_EMSIHDGMK(bi)GQK(bi)YGSK_;_EMSIHDGMK(bi)GQK(bi)YGSK_;_EMSIHDGMK(bi)GQK(bi)YGSK_;_EMSIHDGM…	EMSIHDGMK(0.191)GQK(0.733)YGSK(0.076);EMSIHDGMKGQK(0.965)YGSK(0.035);EMSIHDGMK(1)GQK(0.955)YGSK(0.045);EMSIHDGMK(1)GQK(0.944)YGSK(0.056);EMSIHDGMK(1)GQK(0.925)YGSK(0.075);EMSIHDGMK(1)GQK(0.999)YGSK(0.001);EMSIHDGMK(1)GQK(0.954)YGSK(0.046);EMSIHDGMK(1)GQK(0.992)YGSK(0.008);EMSIHDGMK(1)GQK(0.998)YGSK(0.002);EMSIHDGMK(1)GQK(0.922)YGSK(0.078)	EMSIHDGMK(-5.84)GQK(5.84)YGSK(-9.86);EMSIHDGMK(-37.17)GQK(14.44)YGSK(-14.44);EMSIHDGMK(68.6)GQK(13.35)YGSK(-13.35);EMSIHDGMK(71.46)GQK(12.31)YGSK(-12.31);EMSIHDGMK(80.01)GQK(10.93)YGSK(-10.93);EMSIHDGMK(75.65)GQK(30.73)YGSK(-30.73);EMSIHDGMK(59.35)GQK(13.19)YGSK(-13.19);EMSIHDGMK(134.51)GQK(20.9)YGSK(-20.9);EMSIHDGMK(154.38)GQK(26.98)YGSK(-26.98);EMSIHDGMK(133.39)GQK(10.7)YGSK(-10.7)			_EMSIHDGMKGQK(bi)YGSK_;_EMSIHDGM(ox)K(bi)GQK(bi)YGSK_;_EM(ox)SIHDGMK(bi)GQK(bi)YGSK_;_EMSIHDGMK(bi)GQK(bi)YGSK_
PF3D7_0730900	P. falciparum	EMP1-trafficking protein										21.4671		22.0645	22.4976		22.9037	2 Biotin (K);Oxidation (M)	0	2			21054000	0.0058	77.899	35.831	4	4	3	2646.22	21.853	EMSIHDGMKGQKYGSKNIR	222	1	216.34	216.336	+	NaN	NaN	NaN		1560	1578	_EMSIHDGMKGQK(bi)YGSK(bi)NIR_;_EMSIHDGMKGQK(bi)YGSK(bi)NIR_;_EMSIHDGMKGQK(bi)YGSK(bi)NIR_;_EMSIHDGMKGQK(bi)YGSK(bi)NIR_;_EMSIHDGMKGQK(bi)YGSK(bi)NIR_;_EMSIHDGMKGQK(bi)YGSK(bi)NIR_;_EMSIHDGMKGQK(bi)YGSK(bi)NIR_;_EMSIHDGMKGQK(bi)YGSK(bi)NIR_;_EM(ox)SIHDGM(ox)K(bi)GQK(bi)YGSK(bi)NIR_;_EM(ox)SIHDGM(ox)K(bi)GQK(bi)YGSK(bi)NIR_;_EM(ox)SIHDGM(ox)K(bi)GQK(bi)YGSK(bi)NIR_;_EM(ox)SIHDGM(ox)K(bi)GQK(bi)YGSK…	EMSIHDGMKGQK(1)YGSK(1)NIR;EMSIHDGMKGQK(1)YGSK(1)NIR;EMSIHDGMKGQK(1)YGSK(1)NIR;EMSIHDGMK(0.002)GQK(0.998)YGSK(1)NIR;EMSIHDGMKGQK(1)YGSK(1)NIR;EMSIHDGMK(0.001)GQK(0.999)YGSK(1)NIR;EMSIHDGMKGQK(1)YGSK(1)NIR;EMSIHDGMK(0.002)GQK(0.998)YGSK(1)NIR;EMSIHDGMK(1)GQK(1)YGSK(1)NIR;EMSIHDGMK(1)GQK(1)YGSK(1)NIR;EMSIHDGMK(1)GQK(1)YGSK(1)NIR;EMSIHDGMK(1)GQK(1)YGSK(1)NIR;EMSIHDGMK(1)GQK(1)YGSK(1)NIR;EMSIHDGMK(1)G…	EMSIHDGMK(-55.38)GQK(55.38)YGSK(103.11)NIR;EMSIHDGMK(-39.23)GQK(39.23)YGSK(72.1)NIR;EMSIHDGMK(-41.12)GQK(41.12)YGSK(74.79)NIR;EMSIHDGMK(-26.96)GQK(26.96)YGSK(62.63)NIR;EMSIHDGMK(-33.15)GQK(33.15)YGSK(79.06)NIR;EMSIHDGMK(-31.37)GQK(31.37)YGSK(65.15)NIR;EMSIHDGMK(-35)GQK(35)YGSK(100.28)NIR;EMSIHDGMK(-26.1)GQK(26.1)YGSK(61.95)NIR;EMSIHDGMK(133.94)GQK(133.94)YGSK(133.94)NIR;EMSIHDGMK(169.58)GQK(169.5…			_EMSIHDGMKGQK(bi)YGSK(bi)NIR_;_EM(ox)SIHDGM(ox)K(bi)GQK(bi)YGSK(bi)NIR_;_EM(ox)SIHDGMK(bi)GQK(bi)YGSK(bi)NIR_;_EMSIHDGM(ox)K(bi)GQK(bi)YGSK(bi)NIR_;_EMSIHDGMK(bi)GQK(bi)YGSK(bi)NIR_;_EM(ox)SIHDGMKGQK(bi)YGSK(bi)NIR_;_EMSIHDGM(ox)KGQK(bi)YGSK(bi)NIR_
PF3D7_0730900	P. falciparum	EMP1-trafficking protein										24.4105	24.8481	23.7182	23.9672		23.8576	2 Biotin (K);Oxidation (M)	0	2			97866000	8.72e-22	183.39	124.46	23	NaN	2	3004.36	30.09	FVSELKSNTYSYMNKNPYSHK	222	NaN	NaN	NaN		NaN	NaN	NaN		989	1009	_FVSELK(bi)SNTYSYM(ox)NKNPYSHK_;_FVSELK(bi)SNTYSYM(ox)NKNPYSHK_;_FVSELK(bi)SNTYSYM(ox)NKNPYSHK_;_FVSELK(bi)SNTYSYM(ox)NKNPYSHK_;_FVSELK(bi)SNTYSYM(ox)NKNPYSHK_;_FVSELK(bi)SNTYSYM(ox)NKNPYSHK_;_FVSELK(bi)SNTYSYM(ox)NKNPYSHK_;_FVSELK(bi)SNTYSYM(ox)NKNPYSHK_;_FVSELK(bi)SNTYSYM(ox)NKNPYSHK_;_FVSELK(bi)SNTYSYM(ox)NKNPYSHK_;_FVSELK(bi)SNTYSYM(ox)NKNPYSHK_;_FVSELK(bi)SNTYSYM(ox)NKNPYSHK_;_FVSELK(bi)SNTY…	FVSELK(1)SNTYSYMNKNPYSHK;FVSELK(1)SNTYSYMNKNPYSHK;FVSELK(1)SNTYSYMNKNPYSHK;FVSELK(0.97)SNTYSYMNK(0.027)NPYSHK(0.003);FVSELK(1)SNTYSYMNKNPYSHK;FVSELK(1)SNTYSYMNKNPYSHK;FVSELK(1)SNTYSYMNKNPYSHK;FVSELK(1)SNTYSYMNKNPYSHK;FVSELK(1)SNTYSYMNKNPYSHK;FVSELK(1)SNTYSYMNKNPYSHK;FVSELK(1)SNTYSYMNKNPYSHK;FVSELK(1)SNTYSYMNKNPYSHK;FVSELK(0.999)SNTYSYMNK(0.001)NPYSHK;FVSELK(1)SNTYSYMNKNPYSHK;FVSELK(1)SNTYSYMNKNPY…	FVSELK(67.53)SNTYSYMNK(-67.53)NPYSHK(-76.3);FVSELK(55.6)SNTYSYMNK(-55.6)NPYSHK(-61.37);FVSELK(61.77)SNTYSYMNK(-61.77)NPYSHK(-68.87);FVSELK(15.52)SNTYSYMNK(-15.52)NPYSHK(-25.12);FVSELK(84.61)SNTYSYMNK(-84.61)NPYSHK(-93.87);FVSELK(56.26)SNTYSYMNK(-56.26)NPYSHK(-62.7);FVSELK(53.76)SNTYSYMNK(-53.76)NPYSHK(-61.97);FVSELK(43.17)SNTYSYMNK(-43.17)NPYSHK(-58.31);FVSELK(61.16)SNTYSYMNK(-61.16)NPYSHK(-76.59…			_FVSELK(bi)SNTYSYM(ox)NKNPYSHK_;_FVSELK(bi)SNTYSYMNKNPYSHK_;_FVSELK(bi)SNTYSYMNK(bi)NPYSHK_;_FVSELK(bi)SNTYSYM(ox)NK(bi)NPYSHK_
PF3D7_0730900	P. falciparum	EMP1-trafficking protein										24.604	23.6865	24.654	23.8288	23.5285	23.4676	2 Biotin (K);Oxidation (M)	0	2			103960000	1.16e-06	126.91	80.452	14	NaN	3	3132.45	27.944	FVSELKSNTYSYMNKNPYSHKK	222	0.8063	61.087	6.23054	+	NaN	NaN	NaN		989	1010	_FVSELK(bi)SNTYSYM(ox)NKNPYSHKK_;_FVSELK(bi)SNTYSYM(ox)NKNPYSHKK_;_FVSELK(bi)SNTYSYM(ox)NKNPYSHKK_;_FVSELK(bi)SNTYSYM(ox)NKNPYSHKK_;_FVSELK(bi)SNTYSYM(ox)NKNPYSHKK_;_FVSELK(bi)SNTYSYM(ox)NKNPYSHKK_;_FVSELK(bi)SNTYSYM(ox)NKNPYSHKK_;_FVSELK(bi)SNTYSYM(ox)NKNPYSHKK_;_FVSELK(bi)SNTYSYM(ox)NKNPYSHKK_;_FVSELK(bi)SNTYSYM(ox)NKNPYSHKK_;_FVSELK(bi)SNTYSYM(ox)NKNPYSHKK_;_FVSELK(bi)SNTYSYM(ox)NKNPYSHKK_;_FV…	FVSELK(1)SNTYSYMNKNPYSHKK;FVSELK(0.999)SNTYSYMNK(0.001)NPYSHKK;FVSELK(1)SNTYSYMNKNPYSHKK;FVSELK(0.999)SNTYSYMNKNPYSHKK;FVSELK(1)SNTYSYMNKNPYSHKK;FVSELK(1)SNTYSYMNKNPYSHKK;FVSELK(1)SNTYSYMNKNPYSHKK;FVSELK(1)SNTYSYMNKNPYSHKK;FVSELK(1)SNTYSYMNKNPYSHKK;FVSELK(0.997)SNTYSYMNK(0.003)NPYSHKK;FVSELK(1)SNTYSYMNKNPYSHKK;FVSELK(1)SNTYSYMNKNPYSHKK;FVSELK(1)SNTYSYMNKNPYSHKK;FVSELK(0.916)SNTYSYMNK(0.082)NPYSHK…	FVSELK(81.23)SNTYSYMNK(-81.23)NPYSHK(-84.94)K(-84.94);FVSELK(32.93)SNTYSYMNK(-32.93)NPYSHK(-42.25)K(-42.25);FVSELK(57.52)SNTYSYMNK(-57.52)NPYSHK(-64.5)K(-64.5);FVSELK(36.04)SNTYSYMNK(-40.91)NPYSHK(-36.04)K(-36.04);FVSELK(52.88)SNTYSYMNK(-52.88)NPYSHK(-56.57)K(-56.57);FVSELK(34.16)SNTYSYMNK(-34.16)NPYSHK(-51.43)K(-44.69);FVSELK(42.5)SNTYSYMNK(-42.5)NPYSHK(-46.25)K(-46.77);FVSELK(35.15)SNTYSYMNK(-3…			_FVSELK(bi)SNTYSYM(ox)NKNPYSHKK_;_FVSELK(bi)SNTYSYMNKNPYSHKK_;_FVSELKSNTYSYMNK(bi)NPYSHKK_;_FVSELK(bi)SNTYSYMNK(bi)NPYSHKK_;_FVSELK(bi)SNTYSYMNKNPYSHK(bi)K_;_FVSELK(bi)SNTYSYMNKNPYSHKK(bi)_;_FVSELK(bi)SNTYSYM(ox)NK(bi)NPYSHKK_
PF3D7_0202000	P. falciparum	knob-associated histidine-rich protein					21.9276		22.4574	22.4037	21.9329							2 Biotin (K);Oxidation (M)	0	2			19300000	0.00017271	62.434	29.611	3	4	2	4336.92	24.203	GASTTAGSTTGATTGANAVQSKDETADKNAANNGEQVMSR	117	1	62.434	62.4336	+	0.720288	103.289	5.87047		596	635	_GASTTAGSTTGATTGANAVQSKDETADK(bi)NAANNGEQVM(ox)SR_;_GASTTAGSTTGATTGANAVQSK(bi)DETADKNAANNGEQVM(ox)SR_;_GASTTAGSTTGATTGANAVQSK(bi)DETADKNAANNGEQVM(ox)SR_;_GASTTAGSTTGATTGANAVQSK(bi)DETADKNAANNGEQVM(ox)SR_;_GASTTAGSTTGATTGANAVQSK(bi)DETADKNAANNGEQVM(ox)SR_;_GASTTAGSTTGATTGANAVQSK(bi)DETADKNAANNGEQVM(ox)SR_;_GASTTAGSTTGATTGANAVQSK(bi)DETADKNAANNGEQVM(ox)SR_;_GASTTAGSTTGATTGANAVQSK(bi)DETADKNAANNGEQV…	GASTTAGSTTGATTGANAVQSK(0.111)DETADK(0.889)NAANNGEQVMSR;GASTTAGSTTGATTGANAVQSK(0.995)DETADK(0.005)NAANNGEQVMSR;GASTTAGSTTGATTGANAVQSK(0.763)DETADK(0.237)NAANNGEQVMSR;GASTTAGSTTGATTGANAVQSK(0.992)DETADK(0.008)NAANNGEQVMSR;GASTTAGSTTGATTGANAVQSK(0.5)DETADK(0.5)NAANNGEQVMSR;GASTTAGSTTGATTGANAVQSK(0.73)DETADK(0.27)NAANNGEQVMSR;GASTTAGSTTGATTGANAVQSK(0.517)DETADK(0.483)NAANNGEQVMSR;GASTTAGSTTGATTGANAVQ…	GASTTAGSTTGATTGANAVQSK(-9.02)DETADK(9.02)NAANNGEQVMSR;GASTTAGSTTGATTGANAVQSK(23.26)DETADK(-23.26)NAANNGEQVMSR;GASTTAGSTTGATTGANAVQSK(5.08)DETADK(-5.08)NAANNGEQVMSR;GASTTAGSTTGATTGANAVQSK(21.03)DETADK(-21.03)NAANNGEQVMSR;GASTTAGSTTGATTGANAVQSK(0)DETADK(0)NAANNGEQVMSR;GASTTAGSTTGATTGANAVQSK(4.31)DETADK(-4.31)NAANNGEQVMSR;GASTTAGSTTGATTGANAVQSK(0.3)DETADK(-0.3)NAANNGEQVMSR;GASTTAGSTTGATTGANAVQSK(10.…	GAS(0.419)T(0.419)T(0.156)AGS(0.001)T(0.001)T(0.001)GAT(0.001)T(0.001)GANAVQS(0.001)KDETADKNAANNGEQVMSR;GAS(0.429)T(0.429)T(0.132)AGS(0.006)T(0.002)T(0.002)GAT(0.002)TGANAVQSKDETADKNAANNGEQVMSR;GAS(0.06)T(0.136)T(0.042)AGS(0.236)T(0.181)T(0.069)GAT(0.075)T(0.03)GANAVQS(0.077)KDET(0.095)ADKNAANNGEQVMSR;GAS(0.474)T(0.427)T(0.085)AGS(0.003)T(0.003)T(0.002)GAT(0.001)T(0.001)GANAVQS(0.002)KDET(0.002)A…	GAS(0)T(0)T(-4.32)AGS(-25.48)T(-25.48)T(-27.53)GAT(-27.95)T(-27.95)GANAVQS(-27.27)KDET(-31.32)ADKNAANNGEQVMS(-60.74)R;GAS(0)T(0)T(-5.15)AGS(-18.85)T(-23.87)T(-23.87)GAT(-24.25)T(-34.39)GANAVQS(-43.59)KDET(-43.03)ADKNAANNGEQVMS(-69.5)R;GAS(-6.17)T(-2.54)T(-7.59)AGS(1.13)T(-1.13)T(-5.38)GAT(-4.99)T(-9.07)GANAVQS(-4.99)KDET(-4.99)ADKNAANNGEQVMS(-36.21)R;GAS(0.46)T(-0.46)T(-7.51)AGS(-21.41)T(-21.41)T…	_GASTTAGSTTGATTGANAVQSKDETADK(bi)NAANNGEQVM(ox)SR_;_GASTTAGSTTGATTGANAVQSK(bi)DETADKNAANNGEQVM(ox)SR_;_GAS(ph)TTAGSTTGATTGANAVQSKDETADK(bi)NAANNGEQVM(ox)SR_;_GASTTAGS(ph)TTGATTGANAVQSKDETADK(bi)NAANNGEQVM(ox)SR_;_GASTTAGSTTGATTGANAVQS(ph)KDETADK(bi)NAANNGEQVM(ox)SR_;_GAST(ph)TAGSTTGATTGANAVQSKDETADK(bi)NAANNGEQVM(ox)SR_;_GASTT(ph)AGSTTGATTGANAVQSKDETADK(bi)NAANNGEQVM(ox)SR_;_GASTTAGSTTGATTGANAVQS…
PF3D7_0730900	P. falciparum	EMP1-trafficking protein										22.2756		21.4672	22.2121	22.2804	22.6998	2 Biotin (K);Oxidation (M)	0	2			24742000	7.91e-07	132.79	83.196	7	4	2	2667.22	15.157	HHEKGVNVQSSNTNKHMPR	222	NaN	NaN	NaN		NaN	NaN	NaN		2088	2106	_HHEK(bi)GVNVQSSNTNKHMPR_;_HHEK(bi)GVNVQSSNTNKHMPR_;_HHEK(bi)GVNVQSSNTNKHMPR_;_HHEK(bi)GVNVQSSNTNKHMPR_;_HHEK(bi)GVNVQSSNTNKHMPR_;_HHEK(bi)GVNVQSSNTNKHMPR_;_HHEKGVNVQSSNTNK(bi)HMPR_;_HHEK(bi)GVNVQSSNTNKHMPR_;_HHEK(bi)GVNVQSSNTNKHMPR_;_HHEK(bi)GVNVQSSNTNKHMPR_;_HHEK(bi)GVNVQSSNTNKHMPR_;_HHEK(bi)GVNVQSSNTNKHMPR_;_HHEK(bi)GVNVQSSNTNKHMPR_;_HHEK(bi)GVNVQSSNTNKHMPR_;_HHEK(bi)GVNVQSSNTNKHMPR_;_HHEK(bi)…	HHEK(1)GVNVQSSNTNKHMPR;HHEK(1)GVNVQSSNTNKHMPR;HHEK(1)GVNVQSSNTNKHMPR;HHEK(1)GVNVQSSNTNKHMPR;HHEK(1)GVNVQSSNTNKHMPR;HHEK(1)GVNVQSSNTNKHMPR;HHEKGVNVQSSNTNK(1)HMPR;HHEK(1)GVNVQSSNTNKHMPR;HHEK(1)GVNVQSSNTNKHMPR;HHEK(1)GVNVQSSNTNKHMPR;HHEK(1)GVNVQSSNTNKHMPR;HHEK(1)GVNVQSSNTNKHMPR;HHEK(1)GVNVQSSNTNKHMPR;HHEK(1)GVNVQSSNTNKHMPR;HHEK(1)GVNVQSSNTNKHMPR;HHEK(1)GVNVQSSNTNKHMPR;HHEK(1)GVNVQSSNTNKHMPR;HHEK(1)G…	HHEK(57)GVNVQSSNTNK(-57)HMPR;HHEK(60.34)GVNVQSSNTNK(-60.34)HMPR;HHEK(54.67)GVNVQSSNTNK(-54.67)HMPR;HHEK(49.48)GVNVQSSNTNK(-49.48)HMPR;HHEK(64.46)GVNVQSSNTNK(-64.46)HMPR;HHEK(67.65)GVNVQSSNTNK(-67.65)HMPR;HHEK(-45.34)GVNVQSSNTNK(45.34)HMPR;HHEK(62.59)GVNVQSSNTNK(-62.59)HMPR;HHEK(69.98)GVNVQSSNTNK(-69.98)HMPR;HHEK(70.19)GVNVQSSNTNK(-70.19)HMPR;HHEK(44.54)GVNVQSSNTNK(-44.54)HMPR;HHEK(72.35)GVNVQSSNT…	HHEKGVNVQS(0.299)S(0.299)NT(0.402)NKHMPR;HHEKGVNVQS(0.487)S(0.487)NT(0.025)NKHMPR	HHEKGVNVQS(-1.28)S(-1.28)NT(1.28)NKHMPR;HHEKGVNVQS(0)S(0)NT(-12.88)NKHMPR	_HHEK(bi)GVNVQSSNTNKHMPR_;_HHEKGVNVQSSNTNK(bi)HMPR_;_HHEK(bi)GVNVQSSNT(ph)NKHMPR_;_HHEK(bi)GVNVQS(ph)SNTNKHMPR_;_HHEK(bi)GVNVQSSNTNK(bi)HMPR_;_HHEK(bi)GVNVQSSNTNK(bi)HM(ox)PR_;_HHEK(bi)GVNVQSSNTNKHM(ox)PR_
PF3D7_0730900	P. falciparum	EMP1-trafficking protein										21.0178		21.6611	22.4342			2 Biotin (K);Oxidation (M)	0	2			11107000	0.0056778	70.121	43.619	4	4	3	3150.42	24.709	HLTDEENKVEKEMSIHDGMKGQK	222	NaN	NaN	NaN		NaN	NaN	NaN		1165	1187	_HLTDEENKVEKEM(ox)SIHDGMKGQK(bi)_;_HLTDEENKVEKEMSIHDGM(ox)K(bi)GQK_;_HLTDEENKVEKEMSIHDGM(ox)K(bi)GQK_;_HLTDEENKVEKEMSIHDGM(ox)K(bi)GQK_;_HLTDEENKVEKEM(ox)SIHDGMK(bi)GQK_;_HLTDEENKVEKEMSIHDGM(ox)K(bi)GQK_;_HLTDEENKVEKEM(ox)SIHDGMK(bi)GQK_;_HLTDEENKVEKEMSIHDGM(ox)K(bi)GQK_;_HLTDEENKVEKEM(ox)SIHDGMK(bi)GQK_;_HLTDEENKVEKEM(ox)SIHDGMK(bi)GQK_;_HLTDEENKVEKEMSIHDGM(ox)K(bi)GQK_;_HLTDEENKVEKEMSIHDGM(ox)K…	HLTDEENKVEKEMSIHDGMK(0.436)GQK(0.564);HLTDEENKVEK(0.001)EMSIHDGMK(0.784)GQK(0.215);HLTDEENKVEK(0.001)EMSIHDGMK(0.983)GQK(0.016);HLTDEENKVEKEMSIHDGMK(0.774)GQK(0.226);HLTDEENKVEK(0.002)EMSIHDGMK(0.941)GQK(0.056);HLTDEENKVEK(0.018)EMSIHDGMK(0.767)GQK(0.215);HLTDEENKVEKEMSIHDGMK(0.853)GQK(0.147);HLTDEENKVEK(0.001)EMSIHDGMK(0.929)GQK(0.07);HLTDEENKVEK(0.002)EMSIHDGMK(0.764)GQK(0.234);HLTDEENKVEKEMSIH…	HLTDEENK(-64.33)VEK(-36.93)EMSIHDGMK(-1.11)GQK(1.11);HLTDEENK(-61.09)VEK(-32.12)EMSIHDGMK(5.61)GQK(-5.61);HLTDEENK(-55.3)VEK(-30.61)EMSIHDGMK(17.91)GQK(-17.91);HLTDEENK(-61.97)VEK(-42.68)EMSIHDGMK(5.36)GQK(-5.36);HLTDEENK(-52.16)VEK(-28.69)EMSIHDGMK(12.28)GQK(-12.28);HLTDEENK(-41.37)VEK(-16.36)EMSIHDGMK(5.53)GQK(-5.53);HLTDEENK(-35.4)VEK(-35.4)EMSIHDGMK(7.64)GQK(-7.64);HLTDEENK(-48.47)VEK(-34.2)E…			_HLTDEENKVEKEM(ox)SIHDGMKGQK(bi)_;_HLTDEENKVEKEMSIHDGM(ox)K(bi)GQK_;_HLTDEENKVEKEM(ox)SIHDGMK(bi)GQK_;_HLTDEENKVEKEMSIHDGMK(bi)GQK_;_HLTDEENKVEK(bi)EMSIHDGMKGQK_;_HLTDEENKVEKEM(ox)SIHDGM(ox)K(bi)GQK_;_HLTDEENKVEK(bi)EMSIHDGMK(bi)GQK_;_HLTDEENK(bi)VEKEMSIHDGMK(bi)GQK_;_HLTDEENKVEK(bi)EM(ox)SIHDGMK(bi)GQK_;_HLTDEENK(bi)VEKEMSIHDGM(ox)K(bi)GQK_
PF3D7_0500800	P. falciparum	mature parasite-infected erythrocyte surface antigen							23.2961	22.6127								2 Biotin (K);Oxidation (M)	0	2			16739000	0.0005852	92.136	60.537	3	4	3	3430.69	34.64	ILYNLFLEYNPHMNNKQKAELDKK	159	0.995434	118.36	26.7164	+	NaN	NaN	NaN		1356	1379	_ILYNLFLEYNPHMNNKQKAELDK(bi)K_;_ILYNLFLEYNPHMNNKQKAELDK(bi)K_;_ILYNLFLEYNPHMNNK(bi)QKAELDKK_;_ILYNLFLEYNPHMNNKQKAELDK(bi)K_;_ILYNLFLEYNPHMNNK(bi)QKAELDKK_;_ILYNLFLEYNPHMNNKQKAELDK(bi)K_;_ILYNLFLEYNPHMNNKQKAELDK(bi)K_;_ILYNLFLEYNPHMNNKQKAELDK(bi)K_;_ILYNLFLEYNPHMNNKQKAELDK(bi)K_;_ILYNLFLEYNPHMNNKQKAELDK(bi)K_;_ILYNLFLEYNPHMNNKQK(bi)AELDKK_;_ILYNLFLEYNPHMNNKQKAELDK(bi)K_;_ILYNLFLEYNPHMNNKQKAELDK(bi…	ILYNLFLEYNPHMNNK(0.245)QK(0.181)AELDK(0.287)K(0.287);ILYNLFLEYNPHMNNK(0.005)QK(0.021)AELDK(0.487)K(0.487);ILYNLFLEYNPHMNNK(0.29)QK(0.205)AELDK(0.252)K(0.252);ILYNLFLEYNPHMNNK(0.074)QK(0.074)AELDK(0.426)K(0.426);ILYNLFLEYNPHMNNK(0.461)QK(0.461)AELDK(0.039)K(0.039);ILYNLFLEYNPHMNNK(0.182)QK(0.182)AELDK(0.318)K(0.318);ILYNLFLEYNPHMNNK(0.228)QK(0.228)AELDK(0.272)K(0.272);ILYNLFLEYNPHMNNK(0.129)QK(0.1…	ILYNLFLEYNPHMNNK(-0.68)QK(-2)AELDK(0)K(0);ILYNLFLEYNPHMNNK(-19.69)QK(-13.67)AELDK(0)K(0);ILYNLFLEYNPHMNNK(0.61)QK(-1.51)AELDK(-0.61)K(-0.61);ILYNLFLEYNPHMNNK(-7.57)QK(-7.57)AELDK(0)K(0);ILYNLFLEYNPHMNNK(0)QK(0)AELDK(-10.67)K(-10.67);ILYNLFLEYNPHMNNK(-2.44)QK(-2.44)AELDK(0)K(0);ILYNLFLEYNPHMNNK(-0.77)QK(-0.77)AELDK(0)K(0);ILYNLFLEYNPHMNNK(-5.68)QK(-5.68)AELDK(2.61)K(-2.61);ILYNLFLEYNPHMNNK(-7.56)Q…			_ILYNLFLEYNPHMNNKQKAELDK(bi)K_;_ILYNLFLEYNPHMNNK(bi)QKAELDKK_;_ILYNLFLEYNPHMNNKQK(bi)AELDKK_;_ILYNLFLEYNPHMNNK(bi)QK(bi)AELDKK_;_ILYNLFLEYNPHM(ox)NNKQK(bi)AELDKK_;_ILYNLFLEYNPHM(ox)NNK(bi)QKAELDKK_;_ILYNLFLEYNPHM(ox)NNKQKAELDK(bi)K_;_ILYNLFLEYNPHM(ox)NNK(bi)QK(bi)AELDKK_
PF3D7_0730900	P. falciparum	EMP1-trafficking protein										21.6059		21.7455			20.8544	2 Biotin (K);Oxidation (M)	0	2			8603500	0.01126	87.388	38.352	1	3	2	2491.11	27.609	KFVQEFKSNTHDGMNNK	222	1	207.92	145.294	+	NaN	NaN	NaN		305	321	_KFVQEFK(bi)SNTHDGM(ox)NNK_;_KFVQEFK(bi)SNTHDGM(ox)NNK_;_KFVQEFK(bi)SNTHDGM(ox)NNK_;_KFVQEFK(bi)SNTHDGM(ox)NNK_;_KFVQEFK(bi)SNTHDGM(ox)NNK_;_KFVQEFK(bi)SNTHDGM(ox)NNK_;_KFVQEFK(bi)SNTHDGM(ox)NNK_;_KFVQEFK(bi)SNTHDGM(ox)NNK_;_KFVQEFK(bi)SNTHDGM(ox)NNK_;_KFVQEFK(bi)SNTHDGM(ox)NNK_;_KFVQEFK(bi)SNTHDGM(ox)NNK_;_KFVQEFK(bi)SNTHDGM(ox)NNK_;_K(bi)FVQEFK(bi)SNTHDGMNNK_;_K(bi)FVQEFK(bi)SNTHDGMNNK_;_K(bi)F…	K(0.068)FVQEFK(0.931)SNTHDGMNNK(0.001);KFVQEFK(1)SNTHDGMNNK;K(0.22)FVQEFK(0.78)SNTHDGMNNK;K(0.001)FVQEFK(0.998)SNTHDGMNNK(0.001);K(0.005)FVQEFK(0.992)SNTHDGMNNK(0.003);K(0.009)FVQEFK(0.991)SNTHDGMNNK;K(0.007)FVQEFK(0.99)SNTHDGMNNK(0.003);K(1)FVQEFK(1)SNTHDGMNNK;K(1)FVQEFK(1)SNTHDGMNNK;K(1)FVQEFK(1)SNTHDGMNNK;K(1)FVQEFK(1)SNTHDGMNNK;K(1)FVQEFK(1)SNTHDGMNNK;K(1)FVQEFK(1)SNTHDGMNNK;K(1)FVQEFK(1)SNTH…	K(-11.37)FVQEFK(11.37)SNTHDGMNNK(-32.17);K(-47.74)FVQEFK(45.71)SNTHDGMNNK(-45.71);K(-5.5)FVQEFK(5.5)SNTHDGMNNK(-46.31);K(-32.43)FVQEFK(29.65)SNTHDGMNNK(-29.65);K(-22.93)FVQEFK(22.93)SNTHDGMNNK(-25.49);K(-20.42)FVQEFK(20.42)SNTHDGMNNK(-43.21);K(-21.47)FVQEFK(21.47)SNTHDGMNNK(-24.68);K(168.96)FVQEFK(91.37)SNTHDGMNNK(-91.37);K(170.65)FVQEFK(82.28)SNTHDGMNNK(-82.28);K(206.33)FVQEFK(105.87)SNTHDGMNNK(…			_KFVQEFK(bi)SNTHDGM(ox)NNK_;_K(bi)FVQEFK(bi)SNTHDGMNNK_;_KFVQEFK(bi)SNTHDGMNNK_;_K(bi)FVQEFK(bi)SNTHDGM(ox)NNK_
PF3D7_0730900	P. falciparum	EMP1-trafficking protein											21.5771		20.9531		21.2474	2 Biotin (K);Oxidation (M)	0	2			7648200	0.001255	107.51	54.115	2	3	2	2406.11	32.99	KFVSELKSNTYSYMNK	222	NaN	NaN	NaN		NaN	NaN	NaN		988	1003	_KFVSELK(bi)SNTYSYMNK_;_KFVSELK(bi)SNTYSYMNK_;_KFVSELK(bi)SNTYSYMNK_;_KFVSELK(bi)SNTYSYMNK_;_KFVSELK(bi)SNTYSYMNK_;_KFVSELK(bi)SNTYSYMNK_;_K(bi)FVSELK(bi)SNTYSYMNK_;_K(bi)FVSELK(bi)SNTYSYMNK_;_K(bi)FVSELK(bi)SNTYSYMNK_;_K(bi)FVSELK(bi)SNTYSYMNK_;_K(bi)FVSELK(bi)SNTYSYMNK_;_K(bi)FVSELK(bi)SNTYSYMNK_;_K(bi)FVSELK(bi)SNTYSYMNK_;_K(bi)FVSELK(bi)SNTYSYMNK_;_K(bi)FVSELK(bi)SNTYSYMNK_;_K(bi)FVSELK(bi)SN…	KFVSELK(1)SNTYSYMNK;KFVSELK(1)SNTYSYMNK;KFVSELK(1)SNTYSYMNK;K(0.186)FVSELK(0.814)SNTYSYMNK;K(0.058)FVSELK(0.942)SNTYSYMNK;K(0.002)FVSELK(0.998)SNTYSYMNK;K(1)FVSELK(1)SNTYSYMNK;K(1)FVSELK(1)SNTYSYMNK;K(1)FVSELK(1)SNTYSYMNK;K(1)FVSELK(1)SNTYSYMNK;K(1)FVSELK(1)SNTYSYMNK;K(1)FVSELK(1)SNTYSYMNK;K(1)FVSELK(1)SNTYSYMNK;K(1)FVSELK(1)SNTYSYMNK;K(1)FVSELK(1)SNTYSYMNK;K(1)FVSELK(1)SNTYSYMNK;K(1)FVSELK(1)SNT…	K(-45.33)FVSELK(45.33)SNTYSYMNK(-147.81);K(-42.29)FVSELK(42.29)SNTYSYMNK(-145.31);K(-44.73)FVSELK(44.73)SNTYSYMNK(-122.15);K(-6.41)FVSELK(6.41)SNTYSYMNK(-110.38);K(-12.11)FVSELK(12.11)SNTYSYMNK(-131.26);K(-27.2)FVSELK(27.2)SNTYSYMNK(-109.42);K(132.89)FVSELK(93.95)SNTYSYMNK(-93.95);K(165.19)FVSELK(77.02)SNTYSYMNK(-77.02);K(158.71)FVSELK(101.94)SNTYSYMNK(-101.94);K(125.91)FVSELK(64.62)SNTYSYMNK(-64…			_KFVSELK(bi)SNTYSYMNK_;_K(bi)FVSELK(bi)SNTYSYMNK_;_K(bi)FVSELK(bi)SNTYSYM(ox)NK_
PF3D7_0730900	P. falciparum	EMP1-trafficking protein										23.0939	23.632	22.6285	22.6867			2 Biotin (K);Oxidation (M)	0	2			35177000	4.07e-07	104.55	67.679	7	4	3	3931.74	26.904	KGCTVHEIGFMDDDNRNTMNDTTPNVNLKK	222	0.541685	87.052	0.732327	+	NaN	NaN	NaN		1712	1741	_K(bi)GCTVHEIGFMDDDNRNTMNDTTPNVNLKK_;_K(bi)GCTVHEIGFMDDDNRNTMNDTTPNVNLKK_;_K(bi)GCTVHEIGFMDDDNRNTMNDTTPNVNLKK_;_K(bi)GCTVHEIGFMDDDNRNTMNDTTPNVNLKK_;_K(bi)GCTVHEIGFMDDDNRNTMNDTTPNVNLKK_;_K(bi)GCTVHEIGFMDDDNRNTMNDTTPNVNLKK_;_K(bi)GCTVHEIGFMDDDNRNTMNDTTPNVNLKK_;_K(bi)GCTVHEIGFMDDDNRNTMNDTTPNVNLKK_;_K(bi)GCTVHEIGFMDDDNRNTMNDTTPNVNLKK_;_K(bi)GCTVHEIGFMDDDNRNTMNDTTPNVNLKK_;_K(bi)GCTVHEIGFMDDDNRNTMNDTTP…	K(1)GCTVHEIGFMDDDNRNTMNDTTPNVNLKK;K(1)GCTVHEIGFMDDDNRNTMNDTTPNVNLKK;K(1)GCTVHEIGFMDDDNRNTMNDTTPNVNLKK;K(1)GCTVHEIGFMDDDNRNTMNDTTPNVNLKK;K(1)GCTVHEIGFMDDDNRNTMNDTTPNVNLKK;K(1)GCTVHEIGFMDDDNRNTMNDTTPNVNLKK;K(1)GCTVHEIGFMDDDNRNTMNDTTPNVNLKK;K(1)GCTVHEIGFMDDDNRNTMNDTTPNVNLKK;K(1)GCTVHEIGFMDDDNRNTMNDTTPNVNLKK;K(1)GCTVHEIGFMDDDNRNTMNDTTPNVNLKK;K(1)GCTVHEIGFMDDDNRNTMNDTTPNVNLKK;K(1)GCTVHEIGFMDDDNRNTMNDT…	K(118.74)GCTVHEIGFMDDDNRNTMNDTTPNVNLK(-118.74)K(-118.99);K(78.74)GCTVHEIGFMDDDNRNTMNDTTPNVNLK(-78.74)K(-78.74);K(93.43)GCTVHEIGFMDDDNRNTMNDTTPNVNLK(-93.43)K(-93.43);K(56.27)GCTVHEIGFMDDDNRNTMNDTTPNVNLK(-56.27)K(-56.27);K(41.12)GCTVHEIGFMDDDNRNTMNDTTPNVNLK(-41.12)K(-41.12);K(82.31)GCTVHEIGFMDDDNRNTMNDTTPNVNLK(-82.31)K(-82.31);K(68.26)GCTVHEIGFMDDDNRNTMNDTTPNVNLK(-68.26)K(-68.26);K(50.5)GCTVHEIGFMD…			_K(bi)GCTVHEIGFMDDDNRNTMNDTTPNVNLKK_;_K(bi)GCTVHEIGFMDDDNRNTM(ox)NDTTPNVNLKK_;_K(bi)GCTVHEIGFM(ox)DDDNRNTMNDTTPNVNLKK_;_K(bi)GCTVHEIGFM(ox)DDDNRNTMNDTTPNVNLKK(bi)_;_K(bi)GCTVHEIGFM(ox)DDDNRNTMNDTTPNVNLK(bi)K_;_K(bi)GCTVHEIGFMDDDNRNTMNDTTPNVNLKK(bi)_;_K(bi)GCTVHEIGFMDDDNRNTMNDTTPNVNLK(bi)K_
PF3D7_0201900	P. falciparum	erythrocyte membrane protein 3					20.7072	21.2219										2 Biotin (K);Oxidation (M)	0	2			4157800	0.0021232	96.562	36.012	4	3	2	2485.18	29.646	NKDLKSIGNMEQQNTGLK	116	1	137.85	120.397	+	NaN	NaN	NaN		1313	1330	_NKDLK(bi)SIGNM(ox)EQQNTGLK_;_NKDLK(bi)SIGNM(ox)EQQNTGLK_;_NKDLK(bi)SIGNM(ox)EQQNTGLK_;_NKDLK(bi)SIGNM(ox)EQQNTGLK_;_NKDLK(bi)SIGNM(ox)EQQNTGLK_;_NKDLK(bi)SIGNM(ox)EQQNTGLK_;_NKDLK(bi)SIGNMEQQNTGLK_;_NKDLK(bi)SIGNMEQQNTGLK_;_NKDLK(bi)SIGNMEQQNTGLK_;_NKDLK(bi)SIGNMEQQNTGLK_;_NKDLK(bi)SIGNMEQQNTGLK_;_NKDLK(bi)SIGNMEQQNTGLK_;_NK(bi)DLK(bi)SIGNM(ox)EQQNTGLK_;_NK(bi)DLK(bi)SIGNM(ox)EQQNTGLK_;_NK(bi)DL…	NK(0.005)DLK(0.995)SIGNMEQQNTGLK;NK(0.021)DLK(0.979)SIGNMEQQNTGLK;NK(0.123)DLK(0.877)SIGNMEQQNTGLK;NK(0.001)DLK(0.999)SIGNMEQQNTGLK;NK(0.065)DLK(0.935)SIGNMEQQNTGLK;NK(0.074)DLK(0.926)SIGNMEQQNTGLK;NK(0.004)DLK(0.996)SIGNMEQQNTGLK;NK(0.141)DLK(0.859)SIGNMEQQNTGLK;NK(0.013)DLK(0.987)SIGNMEQQNTGLK;NK(0.053)DLK(0.947)SIGNMEQQNTGLK;NK(0.006)DLK(0.994)SIGNMEQQNTGLK;NK(0.361)DLK(0.639)SIGNMEQQNTGLK;NK(…	NK(-23.1)DLK(23.1)SIGNMEQQNTGLK(-101.58);NK(-16.77)DLK(16.77)SIGNMEQQNTGLK(-132.49);NK(-8.52)DLK(8.52)SIGNMEQQNTGLK(-142.15);NK(-29.86)DLK(29.86)SIGNMEQQNTGLK(-134.92);NK(-11.56)DLK(11.56)SIGNMEQQNTGLK(-120.91);NK(-10.96)DLK(10.96)SIGNMEQQNTGLK(-89.56);NK(-24.36)DLK(24.36)SIGNMEQQNTGLK(-213.35);NK(-7.86)DLK(7.86)SIGNMEQQNTGLK(-144.59);NK(-18.94)DLK(18.94)SIGNMEQQNTGLK(-107.74);NK(-12.52)DLK(12.52…			_NKDLK(bi)SIGNM(ox)EQQNTGLK_;_NKDLK(bi)SIGNMEQQNTGLK_;_NK(bi)DLK(bi)SIGNM(ox)EQQNTGLK_;_NK(bi)DLK(bi)SIGNMEQQNTGLK_
PF3D7_1301400	P. falciparum	Plasmodium exported protein (hyp12), unknown function					23.2091	21.6673	23.6649	23.0037	22.5682							2 Biotin (K);Oxidation (M)	0	2			40986000	1.75e-19	153.56	98.734	12	3	2	3214.53	34.644	NMNIPKHNANSEYLLDKNLYDLK	373	1	153.56	118.024	+	NaN	NaN	NaN		175	197	_NMNIPK(bi)HNANSEYLLDK(bi)NLYDLK_;_NMNIPK(bi)HNANSEYLLDK(bi)NLYDLK_;_NMNIPK(bi)HNANSEYLLDK(bi)NLYDLK_;_NMNIPK(bi)HNANSEYLLDK(bi)NLYDLK_;_NMNIPK(bi)HNANSEYLLDK(bi)NLYDLK_;_NMNIPK(bi)HNANSEYLLDK(bi)NLYDLK_;_NMNIPK(bi)HNANSEYLLDK(bi)NLYDLK_;_NMNIPK(bi)HNANSEYLLDK(bi)NLYDLK_;_NM(ox)NIPK(bi)HNANSEYLLDK(bi)NLYDLK_;_NM(ox)NIPK(bi)HNANSEYLLDK(bi)NLYDLK_;_NM(ox)NIPK(bi)HNANSEYLLDK(bi)NLYDLK_;_NM(ox)NIPK(b…	NMNIPK(1)HNANSEYLLDK(0.999)NLYDLK(0.001);NMNIPK(1)HNANSEYLLDK(0.994)NLYDLK(0.006);NMNIPK(1)HNANSEYLLDK(0.99)NLYDLK(0.011);NMNIPK(1)HNANSEYLLDK(1)NLYDLK;NMNIPK(1)HNANSEYLLDK(1)NLYDLK;NMNIPK(1)HNANSEYLLDK(1)NLYDLK;NMNIPK(1)HNANSEYLLDK(0.998)NLYDLK(0.002);NMNIPK(1)HNANSEYLLDK(0.999)NLYDLK(0.001);NMNIPK(1)HNANSEYLLDK(0.999)NLYDLK(0.001);NMNIPK(1)HNANSEYLLDK(1)NLYDLK;NMNIPK(1)HNANSEYLLDK(0.999)NLYDLK(…	NMNIPK(78.29)HNANSEYLLDK(30.45)NLYDLK(-30.45);NMNIPK(80.77)HNANSEYLLDK(22.23)NLYDLK(-22.23);NMNIPK(35.62)HNANSEYLLDK(19.8)NLYDLK(-19.8);NMNIPK(88.03)HNANSEYLLDK(38.94)NLYDLK(-38.94);NMNIPK(114.13)HNANSEYLLDK(36.38)NLYDLK(-36.38);NMNIPK(74.34)HNANSEYLLDK(41.38)NLYDLK(-41.38);NMNIPK(62.73)HNANSEYLLDK(27.13)NLYDLK(-27.13);NMNIPK(90.47)HNANSEYLLDK(30.91)NLYDLK(-30.91);NMNIPK(115.98)HNANSEYLLDK(32.38)…			_NMNIPK(bi)HNANSEYLLDK(bi)NLYDLK_;_NM(ox)NIPK(bi)HNANSEYLLDK(bi)NLYDLK_;_NMNIPKHNANSEYLLDK(bi)NLYDLK_
PF3D7_0730900	P. falciparum	EMP1-trafficking protein										23.4298		22.0145	22.8665		21.865	2 Biotin (K);Oxidation (M)	0	2			26971000	3.43e-10	98.552	65.321	9	4	3	4479.02	35.739	NNSDGGINKDFGTKGSVINEIKDNNMNNENMQLGTTK	222	1	98.552	67.7486	+	NaN	NaN	NaN		1017	1053	_NNSDGGINKDFGTK(bi)GSVINEIKDNNM(ox)NNENM(ox)QLGTTK_;_NNSDGGINKDFGTK(bi)GSVINEIKDNNM(ox)NNENM(ox)QLGTTK_;_NNSDGGINKDFGTK(bi)GSVINEIKDNNM(ox)NNENM(ox)QLGTTK_;_NNSDGGINK(bi)DFGTKGSVINEIKDNNM(ox)NNENM(ox)QLGTTK_;_NNSDGGINKDFGTK(bi)GSVINEIKDNNM(ox)NNENM(ox)QLGTTK_;_NNSDGGINK(bi)DFGTKGSVINEIKDNNM(ox)NNENM(ox)QLGTTK_;_NNSDGGINKDFGTK(bi)GSVINEIKDNNM(ox)NNENM(ox)QLGTTK_;_NNSDGGINKDFGTK(bi)GSVINEIKDNNM(ox)…	NNSDGGINK(0.102)DFGTK(0.89)GSVINEIK(0.008)DNNMNNENMQLGTTK;NNSDGGINK(0.023)DFGTK(0.974)GSVINEIK(0.003)DNNMNNENMQLGTTK;NNSDGGINK(0.122)DFGTK(0.864)GSVINEIK(0.014)DNNMNNENMQLGTTK;NNSDGGINK(0.615)DFGTK(0.384)GSVINEIK(0.001)DNNMNNENMQLGTTK;NNSDGGINK(0.005)DFGTK(0.993)GSVINEIK(0.002)DNNMNNENMQLGTTK;NNSDGGINK(0.916)DFGTK(0.084)GSVINEIKDNNMNNENMQLGTTK;NNSDGGINK(0.02)DFGTK(0.976)GSVINEIK(0.004)DNNMNNENMQL…	NNSDGGINK(-9.43)DFGTK(9.43)GSVINEIK(-20.35)DNNMNNENMQLGTTK(-59.02);NNSDGGINK(-16.28)DFGTK(16.28)GSVINEIK(-24.87)DNNMNNENMQLGTTK(-65.1);NNSDGGINK(-8.5)DFGTK(8.5)GSVINEIK(-17.86)DNNMNNENMQLGTTK(-38.4);NNSDGGINK(2.05)DFGTK(-2.05)GSVINEIK(-29.02)DNNMNNENMQLGTTK(-55.64);NNSDGGINK(-22.88)DFGTK(22.88)GSVINEIK(-26.5)DNNMNNENMQLGTTK(-68.85);NNSDGGINK(10.4)DFGTK(-10.4)GSVINEIK(-43.46)DNNMNNENMQLGTTK(-72.52…			_NNSDGGINKDFGTK(bi)GSVINEIKDNNM(ox)NNENM(ox)QLGTTK_;_NNSDGGINK(bi)DFGTKGSVINEIKDNNM(ox)NNENM(ox)QLGTTK_;_NNSDGGINKDFGTK(bi)GSVINEIKDNNMNNENM(ox)QLGTTK_;_NNSDGGINKDFGTK(bi)GSVINEIKDNNM(ox)NNENMQLGTTK_;_NNSDGGINKDFGTK(bi)GSVINEIKDNNMNNENMQLGTTK_;_NNSDGGINK(bi)DFGTK(bi)GSVINEIKDNNM(ox)NNENMQLGTTK_;_NNSDGGINK(bi)DFGTK(bi)GSVINEIKDNNMNNENM(ox)QLGTTK_;_NNSDGGINK(bi)DFGTK(bi)GSVINEIKDNNMNNENMQLGTTK_
PF3D7_0730900	P. falciparum	EMP1-trafficking protein								21.4664		23.1891	23.2961	22.9448	23.3101	22.925	22.7616	2 Biotin (K);Oxidation (M)	0	2			56380000	2.04e-06	124.82	51.089	17	3	2	2837.32	32.896	NVLEKYNDYASKSHGMSSVLK	222	NaN	NaN	NaN		NaN	NaN	NaN		157	177	_NVLEKYNDYASK(bi)SHGMSSVLK_;_NVLEKYNDYASK(bi)SHGMSSVLK_;_NVLEKYNDYASK(bi)SHGMSSVLK_;_NVLEKYNDYASK(bi)SHGMSSVLK_;_NVLEKYNDYASK(bi)SHGMSSVLK_;_NVLEKYNDYASK(bi)SHGMSSVLK_;_NVLEKYNDYASK(bi)SHGMSSVLK_;_NVLEKYNDYASK(bi)SHGMSSVLK_;_NVLEKYNDYASK(bi)SHGMSSVLK_;_NVLEKYNDYASK(bi)SHGMSSVLK_;_NVLEKYNDYASK(bi)SHGMSSVLK_;_NVLEKYNDYASK(bi)SHGMSSVLK_;_NVLEKYNDYASK(bi)SHGMSSVLK_;_NVLEKYNDYASK(bi)SHGMSSVLK_;_NVLEKY…	NVLEKYNDYASK(0.997)SHGMSSVLK(0.003);NVLEKYNDYASK(0.97)SHGMSSVLK(0.03);NVLEKYNDYASK(0.973)SHGMSSVLK(0.027);NVLEKYNDYASK(0.908)SHGMSSVLK(0.092);NVLEKYNDYASK(1)SHGMSSVLK;NVLEKYNDYASK(1)SHGMSSVLK;NVLEKYNDYASK(1)SHGMSSVLK;NVLEKYNDYASK(0.992)SHGMSSVLK(0.008);NVLEKYNDYASK(1)SHGMSSVLK;NVLEKYNDYASK(0.994)SHGMSSVLK(0.006);NVLEKYNDYASK(0.996)SHGMSSVLK(0.004);NVLEKYNDYASK(0.995)SHGMSSVLK(0.005);NVLEKYNDYASK(…	NVLEK(-68.05)YNDYASK(25.5)SHGMSSVLK(-25.5);NVLEK(-67.7)YNDYASK(15.07)SHGMSSVLK(-15.07);NVLEK(-68.54)YNDYASK(15.52)SHGMSSVLK(-15.52);NVLEK(-75.14)YNDYASK(9.95)SHGMSSVLK(-9.95);NVLEK(-99.86)YNDYASK(53.42)SHGMSSVLK(-53.42);NVLEK(-66.29)YNDYASK(37.17)SHGMSSVLK(-37.17);NVLEK(-65.48)YNDYASK(42.46)SHGMSSVLK(-42.46);NVLEK(-51.86)YNDYASK(20.9)SHGMSSVLK(-20.9);NVLEK(-68.46)YNDYASK(34.82)SHGMSSVLK(-34.82);N…			_NVLEKYNDYASK(bi)SHGMSSVLK_;_NVLEK(bi)YNDYASK(bi)SHGMSSVLK_;_NVLEKYNDYASK(bi)SHGM(ox)SSVLK_;_NVLEK(bi)YNDYASK(bi)SHGM(ox)SSVLK_
PF3D7_0730900	P. falciparum	EMP1-trafficking protein										23.2099	23.5522	22.5165	22.7772	22.2426	22.178	2 Biotin (K);Oxidation (M)	0	2			44912000	1.43e-06	121	88.856	13	NaN	3	3242.45	29.82	NYKHLTDEENKVEKEMSIHDGMK	222	1	116.27	83.319	+	NaN	NaN	NaN		1162	1184	_NYK(bi)HLTDEENKVEKEMSIHDGM(ox)K_;_NYK(bi)HLTDEENKVEKEMSIHDGM(ox)K_;_NYK(bi)HLTDEENKVEKEMSIHDGM(ox)K_;_NYK(bi)HLTDEENKVEKEMSIHDGM(ox)K_;_NYK(bi)HLTDEENKVEKEMSIHDGM(ox)K_;_NYK(bi)HLTDEENKVEKEM(ox)SIHDGMK_;_NYK(bi)HLTDEENKVEKEM(ox)SIHDGMK_;_NYK(bi)HLTDEENKVEKEMSIHDGM(ox)K_;_NYK(bi)HLTDEENKVEKEMSIHDGM(ox)K_;_NYK(bi)HLTDEENKVEKEMSIHDGM(ox)K_;_NYK(bi)HLTDEENKVEKEM(ox)SIHDGMK_;_NYK(bi)HLTDEENKVEKEMSIHD…	NYK(1)HLTDEENKVEKEMSIHDGMK;NYK(0.999)HLTDEENK(0.001)VEK(0.001)EMSIHDGMK;NYK(1)HLTDEENKVEKEMSIHDGMK;NYK(1)HLTDEENKVEKEMSIHDGMK;NYK(0.999)HLTDEENK(0.001)VEKEMSIHDGMK;NYK(1)HLTDEENKVEKEMSIHDGMK;NYK(1)HLTDEENKVEKEMSIHDGMK;NYK(1)HLTDEENKVEKEMSIHDGMK;NYK(1)HLTDEENKVEKEMSIHDGMK;NYK(1)HLTDEENKVEKEMSIHDGMK;NYK(1)HLTDEENKVEKEMSIHDGMK;NYK(0.999)HLTDEENK(0.001)VEKEMSIHDGMK;NYK(1)HLTDEENKVEKEMSIHDGMK;NYK(0.99…	NYK(53.87)HLTDEENK(-53.87)VEK(-78.28)EMSIHDGMK(-97.48);NYK(32.27)HLTDEENK(-32.27)VEK(-32.27)EMSIHDGMK(-49.45);NYK(49.46)HLTDEENK(-49.46)VEK(-54.76)EMSIHDGMK(-74.56);NYK(37.64)HLTDEENK(-37.64)VEK(-44.51)EMSIHDGMK(-67.72);NYK(29.34)HLTDEENK(-29.34)VEK(-46.9)EMSIHDGMK(-68.82);NYK(59.76)HLTDEENK(-59.76)VEK(-63.03)EMSIHDGMK(-79.93);NYK(51.21)HLTDEENK(-51.21)VEK(-55.49)EMSIHDGMK(-60.05);NYK(92.29)HLTDE…			_NYK(bi)HLTDEENKVEKEMSIHDGM(ox)K_;_NYK(bi)HLTDEENKVEKEM(ox)SIHDGMK_;_NYK(bi)HLTDEENKVEKEMSIHDGMK_;_NYKHLTDEENKVEK(bi)EMSIHDGMK_;_NYKHLTDEENK(bi)VEKEMSIHDGMK_;_NYK(bi)HLTDEENKVEKEM(ox)SIHDGM(ox)K_;_NYK(bi)HLTDEENKVEK(bi)EM(ox)SIHDGM(ox)K_;_NYK(bi)HLTDEENKVEK(bi)EMSIHDGMK_;_NYK(bi)HLTDEENK(bi)VEKEMSIHDGMK_;_NYK(bi)HLTDEENK(bi)VEKEMSIHDGM(ox)K_
PF3D7_0730900	P. falciparum	EMP1-trafficking protein										22.7342		22.2229	23.0751	22.5872		2 Biotin (K);Oxidation (M)	0	2			27010000	0.00080256	87.729	35.009	6	4	3	3461.55	24.728	QDFPYKNENNHKMYNVNEKEEVPK	222	NaN	NaN	NaN		NaN	NaN	NaN		1203	1226	_QDFPYKNENNHK(bi)M(ox)YNVNEKEEVPK_;_QDFPYK(bi)NENNHKM(ox)YNVNEKEEVPK_;_QDFPYKNENNHK(bi)M(ox)YNVNEKEEVPK_;_QDFPYK(bi)NENNHKM(ox)YNVNEKEEVPK_;_QDFPYK(bi)NENNHKM(ox)YNVNEKEEVPK_;_QDFPYKNENNHK(bi)M(ox)YNVNEKEEVPK_;_QDFPYK(bi)NENNHKM(ox)YNVNEKEEVPK_;_QDFPYK(bi)NENNHKM(ox)YNVNEKEEVPK_;_QDFPYK(bi)NENNHKM(ox)YNVNEKEEVPK_;_QDFPYKNENNHK(bi)MYNVNEKEEVPK_;_QDFPYKNENNHK(bi)MYNVNEKEEVPK_;_QDFPYK(bi)NENNHKMYNVN…	QDFPYK(0.234)NENNHK(0.766)MYNVNEKEEVPK;QDFPYK(0.504)NENNHK(0.495)MYNVNEKEEVPK;QDFPYK(0.005)NENNHK(0.988)MYNVNEK(0.007)EEVPK;QDFPYK(0.5)NENNHK(0.5)MYNVNEKEEVPK;QDFPYK(0.908)NENNHK(0.092)MYNVNEKEEVPK;QDFPYK(0.428)NENNHK(0.572)MYNVNEKEEVPK;QDFPYK(0.006)NENNHK(0.994)MYNVNEKEEVPK;QDFPYK(0.029)NENNHK(0.971)MYNVNEKEEVPK;QDFPYK(0.825)NENNHK(0.175)MYNVNEKEEVPK;QDFPYK(0.999)NENNHK(0.001)MYNVNEKEEVPK;QDFPYK…	QDFPYK(-5.16)NENNHK(5.16)MYNVNEK(-46.42)EEVPK(-53.44);QDFPYK(0.08)NENNHK(-0.08)MYNVNEK(-32.86)EEVPK(-36.29);QDFPYK(-23.17)NENNHK(21.77)MYNVNEK(-21.77)EEVPK(-36.23);QDFPYK(0)NENNHK(0)MYNVNEK(-42.01)EEVPK(-48.16);QDFPYK(9.96)NENNHK(-9.96)MYNVNEK(-34.37)EEVPK(-37.31);QDFPYK(-1.26)NENNHK(1.26)MYNVNEK(-38.61)EEVPK(-43.25);QDFPYK(-22.46)NENNHK(22.46)MYNVNEK(-60.98)EEVPK(-71.81);QDFPYK(-15.28)NENNHK(15.…			_QDFPYKNENNHK(bi)M(ox)YNVNEKEEVPK_;_QDFPYK(bi)NENNHKM(ox)YNVNEKEEVPK_;_QDFPYKNENNHK(bi)MYNVNEKEEVPK_;_QDFPYK(bi)NENNHKMYNVNEKEEVPK_;_QDFPYK(bi)NENNHK(bi)M(ox)YNVNEKEEVPK_;_QDFPYK(bi)NENNHK(bi)MYNVNEKEEVPK_
PF3D7_0730900	P. falciparum	EMP1-trafficking protein										23.0606	22.7956	22.2224	22.9487		22.5596	2 Biotin (K);Oxidation (M)	0	2			35200000	0.0010679	101.92	50.893	3	3	3	2562.21	30.216	RKFVSELKSNTYSYMNK	222	1	174.68	141.733	+	NaN	NaN	NaN		987	1003	_RKFVSELK(bi)SNTYSYMNK_;_RKFVSELK(bi)SNTYSYMNK_;_RK(bi)FVSELK(bi)SNTYSYM(ox)NK_;_RK(bi)FVSELK(bi)SNTYSYM(ox)NK_;_RK(bi)FVSELK(bi)SNTYSYM(ox)NK_;_RK(bi)FVSELK(bi)SNTYSYM(ox)NK_;_RK(bi)FVSELK(bi)SNTYSYM(ox)NK_;_RK(bi)FVSELK(bi)SNTYSYMNK_;_RK(bi)FVSELK(bi)SNTYSYMNK_;_RK(bi)FVSELK(bi)SNTYSYMNK_;_RK(bi)FVSELK(bi)SNTYSYMNK_;_RK(bi)FVSELK(bi)SNTYSYMNK_;_RK(bi)FVSELK(bi)SNTYSYMNK_;_RK(bi)FVSELK(bi)SNTYSY…	RK(0.005)FVSELK(0.995)SNTYSYMNK;RK(1)FVSELK(1)SNTYSYMNK;RK(1)FVSELK(1)SNTYSYMNK;RK(1)FVSELK(0.999)SNTYSYMNK(0.001);RK(1)FVSELK(1)SNTYSYMNK;RK(1)FVSELK(1)SNTYSYMNK;RK(1)FVSELK(1)SNTYSYMNK;RK(1)FVSELK(1)SNTYSYMNK;RK(1)FVSELK(1)SNTYSYMNK;RK(1)FVSELK(1)SNTYSYMNK;RK(1)FVSELK(1)SNTYSYMNK;RK(0.016)FVSELK(0.984)SNTYSYMNK;RK(0.009)FVSELK(0.991)SNTYSYMNK;RK(0.001)FVSELK(0.999)SNTYSYMNK;RK(0.002)FVSELK(0.99…	RK(-22.67)FVSELK(22.67)SNTYSYMNK(-91.28);RK(87.35)FVSELK(62.59)SNTYSYMNK(-62.59);RK(65.53)FVSELK(55.13)SNTYSYMNK(-55.13);RK(77.65)FVSELK(29.44)SNTYSYMNK(-29.44);RK(158.02)FVSELK(96.88)SNTYSYMNK(-96.88);RK(146.22)FVSELK(120.83)SNTYSYMNK(-120.83);RK(154.33)FVSELK(104.23)SNTYSYMNK(-104.23);RK(114.47)FVSELK(76.29)SNTYSYMNK(-76.29);RK(130.01)FVSELK(91.82)SNTYSYMNK(-91.82);RK(169.09)FVSELK(104.31)SNTYS…			_RKFVSELK(bi)SNTYSYMNK_;_RK(bi)FVSELK(bi)SNTYSYM(ox)NK_;_RK(bi)FVSELK(bi)SNTYSYMNK_;_RKFVSELK(bi)SNTYSYM(ox)NK_
PF3D7_1301400	P. falciparum	Plasmodium exported protein (hyp12), unknown function							21.4323	21.3071								2 Biotin (K);Oxidation (M)	0	2			5424500	0.00098176	80.835	49.798	4	4	3	3429.65	31.695	SKNMNIPKHNANSEYLLDKNLYDLK	373	NaN	NaN	NaN		NaN	NaN	NaN		173	197	_SKNMNIPK(bi)HNANSEYLLDK(bi)NLYDLK_;_SK(bi)NMNIPKHNANSEYLLDK(bi)NLYDLK_;_SKNMNIPK(bi)HNANSEYLLDK(bi)NLYDLK_;_SKNM(ox)NIPK(bi)HNANSEYLLDK(bi)NLYDLK_;_SK(bi)NM(ox)NIPKHNANSEYLLDK(bi)NLYDLK_	SK(0.014)NMNIPK(0.986)HNANSEYLLDK(1)NLYDLK;SK(0.596)NMNIPK(0.404)HNANSEYLLDK(0.999)NLYDLK(0.001);SK(0.044)NMNIPK(0.956)HNANSEYLLDK(1)NLYDLK;SK(0.319)NMNIPK(0.681)HNANSEYLLDK(0.986)NLYDLK(0.014);SK(0.567)NMNIPK(0.445)HNANSEYLLDK(0.987)NLYDLK	SK(-18.38)NMNIPK(18.38)HNANSEYLLDK(47.06)NLYDLK(-47.06);SK(1.69)NMNIPK(-1.69)HNANSEYLLDK(33.16)NLYDLK(-33.16);SK(-13.35)NMNIPK(13.35)HNANSEYLLDK(43.56)NLYDLK(-43.56);SK(-3.29)NMNIPK(3.29)HNANSEYLLDK(18.39)NLYDLK(-18.39);SK(1.08)NMNIPK(-1.08)HNANSEYLLDK(16.49)NLYDLK(-35.91)			_SKNMNIPK(bi)HNANSEYLLDK(bi)NLYDLK_;_SK(bi)NMNIPKHNANSEYLLDK(bi)NLYDLK_;_SKNM(ox)NIPK(bi)HNANSEYLLDK(bi)NLYDLK_;_SK(bi)NM(ox)NIPKHNANSEYLLDK(bi)NLYDLK_
PF3D7_0532300	P. falciparum	Plasmodium exported protein (PHISTb), unknown function	N/A															2 Biotin (K);Oxidation (M)	0	2			0	0.0013222	101.6	70.065	1	3	3	3389.56	40.526	EMESKVEKLAENQVEKEFQEVNER	184	NaN	NaN	NaN		NaN	NaN	NaN
Q9BZI7	Homo sapiens			Regulator of nonsense transcripts 3B	UPF3B							20.6062		20.6482		20.6183		2 Biotin (K);Phospho (STY)	1	2			4849000	0.040505	54.812	6.2796	0	3	1	2113.86	35.242	AESTESIGSSEKTEK	509	NaN	NaN	NaN		NaN	NaN	NaN		407	421	_AESTESIGS(ph)SEK(bi)TEK(bi)_;_AESTESIGS(ph)SEK(bi)TEK(bi)_;_AESTESIGS(ph)SEK(bi)TEK(bi)_	AESTESIGSSEK(1)TEK(1)	AESTESIGSSEK(54.81)TEK(54.81)	AESTES(0.065)IGS(0.341)S(0.341)EKT(0.252)EK	AES(-34.92)T(-34.92)ES(-7.17)IGS(0)S(0)EKT(-1.32)EK	_AESTESIGS(ph)SEK(bi)TEK(bi)_
PF3D7_1454400	P. falciparum	aminopeptidase P													22.6778			2 Biotin (K);Phospho (STY)	1	2			6709500	0.00089186	112.24	12.489	1	3	2	2458.12	33.5	DKFGVRIENMQYVISK	456	1	112.24	112.235	+	0.992986	112.24	21.5101		683	698	_DK(bi)FGVRIENMQYVIS(ph)K(bi)_	DK(1)FGVRIENMQYVISK(1)	DK(112.24)FGVRIENMQYVISK(112.24)	DKFGVRIENMQY(0.007)VIS(0.993)K	DKFGVRIENMQY(-21.51)VIS(21.51)K	_DK(bi)FGVRIENMQYVIS(ph)K(bi)_
PF3D7_0202000	P. falciparum	knob-associated histidine-rich protein					19.5994											2 Biotin (K);Phospho (STY)	1	2			794350	0.0059903	95.654	51.013	2	3	3	2915.29	21.07	EATKEASTSKGATKEASTTEGATK	117	NaN	NaN	NaN		0.93742	157.59	14.798		572	595	_EATKEASTSK(bi)GATKEASTTEGATK_;_EATKEASTSK(bi)GATKEASTTEGATK_;_EATKEASTSK(bi)GATKEASTTEGATK_;_EATKEASTSK(bi)GATKEASTTEGATK_;_EATKEAS(ph)TSKGATK(bi)EASTTEGATK_;_EATKEAS(ph)TSKGATK(bi)EASTTEGATK_;_EATKEAS(ph)TSKGATK(bi)EASTTEGATK_;_EATKEAS(ph)TSKGATK(bi)EASTTEGATK_;_EATKEAS(ph)TSKGATK(bi)EASTTEGATK_;_EAT(ph)KEASTSKGATK(bi)EASTTEGATK_;_EATKEAS(ph)TSKGATK(bi)EASTTEGATK_;_EAT(ph)KEASTSKGATK(bi)EASTTEG…	EATK(0.001)EASTSK(0.981)GATK(0.018)EASTTEGATK;EATKEASTSK(0.998)GATK(0.001)EASTTEGATK;EATK(0.018)EASTSK(0.974)GATK(0.009)EASTTEGATK;EATKEASTSK(0.014)GATK(0.986)EASTTEGATK;EATKEASTSK(0.016)GATK(0.984)EASTTEGATK;EATKEASTSKGATK(1)EASTTEGATK;EATKEASTSK(0.026)GATK(0.974)EASTTEGATK;EATKEASTSK(0.399)GATK(0.601)EASTTEGATK;EATK(0.13)EASTSK(0.047)GATK(0.823)EASTTEGATK;EATKEASTSKGATK(1)EASTTEGATK;EATK(0.012)…	EATK(-28.51)EASTSK(17.4)GATK(-17.4)EASTTEGATK(-47.48);EATK(-34.92)EASTSK(28.67)GATK(-28.67)EASTTEGATK(-46.6);EATK(-17.42)EASTSK(17.42)GATK(-20.5)EASTTEGATK(-43.89);EATK(-56.35)EASTSK(-18.58)GATK(18.58)EASTTEGATK(-54);EATK(-48.44)EASTSK(-17.98)GATK(17.98)EASTTEGATK(-41.41);EATK(-48.57)EASTSK(-41.05)GATK(41.05)EASTTEGATK(-53.89);EATK(-55.37)EASTSK(-15.81)GATK(15.81)EASTTEGATK(-48.55);EATK(-41.56)EA…	EAT(0.001)KEAS(0.484)T(0.484)S(0.032)KGATKEASTTEGATK;EAT(0.002)KEAS(0.444)T(0.444)S(0.109)KGAT(0.002)KEASTTEGATK;EAT(0.003)KEAS(0.727)T(0.135)S(0.135)KGATKEASTTEGATK;EATKEAS(0.679)T(0.237)S(0.083)KGATKEASTTEGATK;EAT(0.002)KEAS(0.868)T(0.065)S(0.065)KGATKEASTTEGATK;EAT(0.227)KEAS(0.187)T(0.187)S(0.187)KGAT(0.211)KEASTTEGATK;EATKEAS(0.937)T(0.031)S(0.031)KGATKEASTTEGATK;EAT(0.052)KEAS(0.289)T(0.289…	EAT(-29.45)KEAS(0)T(0)S(-11.85)KGAT(-33.64)KEAS(-47.67)T(-46.07)T(-50.45)EGAT(-60.56)K;EAT(-24.25)KEAS(0)T(0)S(-6.09)KGAT(-23.77)KEAS(-41.41)T(-40.38)T(-45.63)EGAT(-63.77)K;EAT(-23.81)KEAS(7.32)T(-7.32)S(-7.32)KGAT(-42.68)KEAS(-66.32)T(-65.06)T(-65.06)EGAT(-85.4)K;EAT(-35.09)KEAS(4.57)T(-4.57)S(-9.12)KGAT(-35.32)KEAS(-67.03)T(-65.56)T(-69.37)EGAT(-75.73)K;EAT(-23.49)KEAS(11.93)T(-11.93)S(-11.93)K…	_EATKEASTSK(bi)GATKEASTTEGATK_;_EATKEAS(ph)TSKGATK(bi)EASTTEGATK_;_EAT(ph)KEASTSKGATK(bi)EASTTEGATK_;_EATKEASTSK(bi)GATK(bi)EASTTEGATK_;_EATK(bi)EASTSKGATK(bi)EASTTEGATK_;_EATKEASTS(ph)K(bi)GATK(bi)EASTTEGATK_
PF3D7_0406500	P. falciparum	NYN domain-containing protein, putative										22.1978			21.9594			2 Biotin (K);Phospho (STY)	1	2			8888700	0.040166	50.484	23.595	0	2	3	1679.73	25.528	EKEEKTEKK	149	NaN	NaN	NaN		NaN	NaN	NaN		2297	2305	_EK(bi)EEK(bi)T(ph)EKK_;_EK(bi)EEK(bi)T(ph)EKK_	EK(1)EEK(0.994)TEK(0.006)K	EK(40.01)EEK(22.1)TEK(-22.1)K(-35.85)	EKEEKT(1)EKK	EKEEKT(50.48)EKK	_EK(bi)EEK(bi)T(ph)EKK_
PF3D7_0202000	P. falciparum	knob-associated histidine-rich protein				21.7006	23.4425		23.2423	22.5476	23.5165							2 Biotin (K);Phospho (STY)	1	2			42920000	2.71e-13	99.806	69.852	15	4	2	4400.89	28.716	GASTTAGSTTGATTGANAVQSKDETADKNAANNGEQVMSR	117	1	62.434	62.4336	+	0.720288	103.289	5.87047		596	635	_GASTTAGSTTGATTGANAVQSKDETADK(bi)NAANNGEQVM(ox)SR_;_GASTTAGSTTGATTGANAVQSK(bi)DETADKNAANNGEQVM(ox)SR_;_GASTTAGSTTGATTGANAVQSK(bi)DETADKNAANNGEQVM(ox)SR_;_GASTTAGSTTGATTGANAVQSK(bi)DETADKNAANNGEQVM(ox)SR_;_GASTTAGSTTGATTGANAVQSK(bi)DETADKNAANNGEQVM(ox)SR_;_GASTTAGSTTGATTGANAVQSK(bi)DETADKNAANNGEQVM(ox)SR_;_GASTTAGSTTGATTGANAVQSK(bi)DETADKNAANNGEQVM(ox)SR_;_GASTTAGSTTGATTGANAVQSK(bi)DETADKNAANNGEQV…	GASTTAGSTTGATTGANAVQSK(0.111)DETADK(0.889)NAANNGEQVMSR;GASTTAGSTTGATTGANAVQSK(0.995)DETADK(0.005)NAANNGEQVMSR;GASTTAGSTTGATTGANAVQSK(0.763)DETADK(0.237)NAANNGEQVMSR;GASTTAGSTTGATTGANAVQSK(0.992)DETADK(0.008)NAANNGEQVMSR;GASTTAGSTTGATTGANAVQSK(0.5)DETADK(0.5)NAANNGEQVMSR;GASTTAGSTTGATTGANAVQSK(0.73)DETADK(0.27)NAANNGEQVMSR;GASTTAGSTTGATTGANAVQSK(0.517)DETADK(0.483)NAANNGEQVMSR;GASTTAGSTTGATTGANAVQ…	GASTTAGSTTGATTGANAVQSK(-9.02)DETADK(9.02)NAANNGEQVMSR;GASTTAGSTTGATTGANAVQSK(23.26)DETADK(-23.26)NAANNGEQVMSR;GASTTAGSTTGATTGANAVQSK(5.08)DETADK(-5.08)NAANNGEQVMSR;GASTTAGSTTGATTGANAVQSK(21.03)DETADK(-21.03)NAANNGEQVMSR;GASTTAGSTTGATTGANAVQSK(0)DETADK(0)NAANNGEQVMSR;GASTTAGSTTGATTGANAVQSK(4.31)DETADK(-4.31)NAANNGEQVMSR;GASTTAGSTTGATTGANAVQSK(0.3)DETADK(-0.3)NAANNGEQVMSR;GASTTAGSTTGATTGANAVQSK(10.…	GAS(0.419)T(0.419)T(0.156)AGS(0.001)T(0.001)T(0.001)GAT(0.001)T(0.001)GANAVQS(0.001)KDETADKNAANNGEQVMSR;GAS(0.429)T(0.429)T(0.132)AGS(0.006)T(0.002)T(0.002)GAT(0.002)TGANAVQSKDETADKNAANNGEQVMSR;GAS(0.06)T(0.136)T(0.042)AGS(0.236)T(0.181)T(0.069)GAT(0.075)T(0.03)GANAVQS(0.077)KDET(0.095)ADKNAANNGEQVMSR;GAS(0.474)T(0.427)T(0.085)AGS(0.003)T(0.003)T(0.002)GAT(0.001)T(0.001)GANAVQS(0.002)KDET(0.002)A…	GAS(0)T(0)T(-4.32)AGS(-25.48)T(-25.48)T(-27.53)GAT(-27.95)T(-27.95)GANAVQS(-27.27)KDET(-31.32)ADKNAANNGEQVMS(-60.74)R;GAS(0)T(0)T(-5.15)AGS(-18.85)T(-23.87)T(-23.87)GAT(-24.25)T(-34.39)GANAVQS(-43.59)KDET(-43.03)ADKNAANNGEQVMS(-69.5)R;GAS(-6.17)T(-2.54)T(-7.59)AGS(1.13)T(-1.13)T(-5.38)GAT(-4.99)T(-9.07)GANAVQS(-4.99)KDET(-4.99)ADKNAANNGEQVMS(-36.21)R;GAS(0.46)T(-0.46)T(-7.51)AGS(-21.41)T(-21.41)T…	_GASTTAGSTTGATTGANAVQSKDETADK(bi)NAANNGEQVM(ox)SR_;_GASTTAGSTTGATTGANAVQSK(bi)DETADKNAANNGEQVM(ox)SR_;_GAS(ph)TTAGSTTGATTGANAVQSKDETADK(bi)NAANNGEQVM(ox)SR_;_GASTTAGS(ph)TTGATTGANAVQSKDETADK(bi)NAANNGEQVM(ox)SR_;_GASTTAGSTTGATTGANAVQS(ph)KDETADK(bi)NAANNGEQVM(ox)SR_;_GAST(ph)TAGSTTGATTGANAVQSKDETADK(bi)NAANNGEQVM(ox)SR_;_GASTT(ph)AGSTTGATTGANAVQSKDETADK(bi)NAANNGEQVM(ox)SR_;_GASTTAGSTTGATTGANAVQS…
PF3D7_1301400	P. falciparum	Plasmodium exported protein (hyp12), unknown function											25.6649					2 Biotin (K);Phospho (STY)	1	2			53155000	0.0080667	74.812	23.928	1	4	3	2893.38	25.545	KDPNYQLKLYKQIEPDIEK	373	NaN	NaN	NaN		NaN	NaN	NaN		238	256	_KDPNYQLK(bi)LY(ph)K(bi)QIEPDIEK_	K(0.002)DPNYQLK(0.998)LYK(0.999)QIEPDIEK(0.001)	K(-28.3)DPNYQLK(28.3)LYK(29.46)QIEPDIEK(-29.46)	KDPNY(0.006)QLKLY(0.994)KQIEPDIEK	KDPNY(-23.03)QLKLY(23.03)KQIEPDIEK	_KDPNYQLK(bi)LY(ph)K(bi)QIEPDIEK_
PF3D7_0202000	P. falciparum	knob-associated histidine-rich protein				22.2348	21.7314											2 Biotin (K);Phospho (STY)	1	2			8417400	0.0030609	96.208	52.825	2	3	2	2464.02	28.019	YSSFSSVNKYGKHGDEK	117	NaN	NaN	NaN		NaN	NaN	NaN		343	359	_YSSFSSVNKYGK(bi)HGDEK_;_YSSFSSVNKYGK(bi)HGDEK_;_YSSFSSVNKYGK(bi)HGDEK_;_YSSFSSVNKYGK(bi)HGDEK_;_YSSFSSVNKYGK(bi)HGDEK_;_YSSFSSVNKYGK(bi)HGDEK_;_YSSFSSVNKYGK(bi)HGDEK_;_YSSFSSVNKYGK(bi)HGDEK_;_YSSFSSVNKYGK(bi)HGDEK_;_YSSFSSVNKYGK(bi)HGDEK_;_YSSFSSVNKYGK(bi)HGDEK_;_YSSFSSVNKYGK(bi)HGDEK_;_YSSFSSVNKYGK(bi)HGDEK_;_YSSFSSVNKYGK(bi)HGDEK_;_YSSFSSVNKYGK(bi)HGDEK_;_YSSFSSVNKYGK(bi)HGDEK_;_YSSFSSVNKYGK(b…	YSSFSSVNK(0.05)YGK(0.95)HGDEK(0.001);YSSFSSVNK(0.011)YGK(0.954)HGDEK(0.035);YSSFSSVNKYGK(1)HGDEK;YSSFSSVNK(0.058)YGK(0.941)HGDEK;YSSFSSVNK(0.011)YGK(0.93)HGDEK(0.059);YSSFSSVNKYGK(0.999)HGDEK;YSSFSSVNK(0.002)YGK(0.998)HGDEK(0.001);YSSFSSVNK(0.037)YGK(0.866)HGDEK(0.098);YSSFSSVNK(0.083)YGK(0.911)HGDEK(0.005);YSSFSSVNK(0.002)YGK(0.993)HGDEK(0.004);YSSFSSVNK(0.018)YGK(0.982)HGDEK;YSSFSSVNK(0.065)YGK…	YSSFSSVNK(-12.81)YGK(12.81)HGDEK(-32.74);YSSFSSVNK(-19.44)YGK(14.35)HGDEK(-14.35);YSSFSSVNK(-36.68)YGK(36.68)HGDEK(-46.75);YSSFSSVNK(-12.08)YGK(12.08)HGDEK(-34.63);YSSFSSVNK(-19.35)YGK(11.95)HGDEK(-11.95);YSSFSSVNK(-37.77)YGK(33.14)HGDEK(-33.14);YSSFSSVNK(-28.09)YGK(28.09)HGDEK(-32.07);YSSFSSVNK(-13.74)YGK(9.48)HGDEK(-9.48);YSSFSSVNK(-10.38)YGK(10.38)HGDEK(-22.36);YSSFSSVNK(-26.59)YGK(23.54)HGDEK…	Y(0.001)S(0.041)S(0.954)FS(0.004)S(0.001)VNKYGKHGDEK;Y(0.006)S(0.053)S(0.614)FS(0.272)S(0.055)VNKYGKHGDEK;Y(0.001)S(0.006)S(0.845)FS(0.128)S(0.022)VNKYGKHGDEK;Y(0.023)S(0.029)S(0.916)FS(0.029)S(0.004)VNKYGKHGDEK;Y(0.023)S(0.16)S(0.759)FS(0.529)S(0.529)VNKYGKHGDEK;Y(0.48)S(0.144)S(0.458)FS(0.459)S(0.459)VNKYGKHGDEK;Y(0.001)S(0.001)S(0.412)FS(0.326)S(0.259)VNKYGKHGDEK	Y(-30.91)S(-13.7)S(13.7)FS(-24.13)S(-30.91)VNKY(-75.71)GKHGDEK;Y(-19.78)S(-10.66)S(3.54)FS(-3.54)S(-10.57)VNKY(-53.9)GKHGDEK;Y(-30.74)S(-21.62)S(8.24)FS(-8.24)S(-16)VNKY(-69.57)GKHGDEK;Y(-15.99)S(-15.06)S(15.06)FS(-15.06)S(-24.38)VNKY(-65.1)GKHGDEK;Y(-15.83)S(-7.09)S(7.09)FS(0)S(0)VNKY(-36.02)GKHGDEK;Y(0)S(-4.33)S(0)FS(0)S(0)VNKY(-47.87)GKHGDEK;Y(-25.42)S(-24.61)S(1.01)FS(-1.01)S(-2)VNKY(-37.5)GK…	_YSSFSSVNKYGK(bi)HGDEK_;_YSS(ph)FSSVNKYGK(bi)HGDEK_;_YSS(ph)FS(ph)SVNKYGK(bi)HGDEK_;_Y(ph)SS(ph)FSSVNKYGK(bi)HGDEK_;_YSSFSSVNK(bi)YGK(bi)HGDEK_;_YSS(ph)FSSVNK(bi)YGK(bi)HGDEK_
PF3D7_0202000	P. falciparum	knob-associated histidine-rich protein				25.1253	24.7286	23.9495	23.1513	21.8341	21.4436							2 Biotin (K);Phospho (STY)	1	2			96539000	0.002076	85.855	57.53	14	NaN	3	3040.3	21.443	YSSFSSVNKYGKHGDEKHHSSK	117	0.99959	84.66	35.1012	+	NaN	NaN	NaN		343	364	_YSSFSSVNKYGK(bi)HGDEKHHSSK_;_YSSFSSVNKYGK(bi)HGDEKHHSSK_;_YSSFSSVNKYGK(bi)HGDEKHHSSK_;_YSSFSSVNKYGK(bi)HGDEKHHSSK_;_YSSFSSVNKYGK(bi)HGDEKHHSSK_;_YSSFSSVNKYGK(bi)HGDEKHHSSK_;_YSSFSSVNKYGK(bi)HGDEKHHSSK_;_YSSFSSVNKYGK(bi)HGDEKHHSSK_;_YSSFSSVNKYGK(bi)HGDEKHHSSK_;_YSSFSSVNKYGKHGDEK(bi)HHSSK_;_YSSFSSVNKYGK(bi)HGDEKHHSSK_;_YSSFSSVNKYGK(bi)HGDEKHHSSK_;_YSSFSSVNKYGK(bi)HGDEKHHSSK_;_YSSFSSVNKYGK(bi)HGDEK…	YSSFSSVNK(0.316)YGK(0.683)HGDEK(0.001)HHSSK;YSSFSSVNK(0.183)YGK(0.794)HGDEK(0.022)HHSSK(0.001);YSSFSSVNK(0.032)YGK(0.644)HGDEK(0.324)HHSSK;YSSFSSVNK(0.001)YGK(0.996)HGDEK(0.003)HHSSK;YSSFSSVNK(0.023)YGK(0.975)HGDEK(0.002)HHSSK;YSSFSSVNK(0.016)YGK(0.982)HGDEK(0.002)HHSSK;YSSFSSVNK(0.248)YGK(0.745)HGDEK(0.006)HHSSK;YSSFSSVNK(0.068)YGK(0.931)HGDEK(0.001)HHSSK;YSSFSSVNK(0.013)YGK(0.885)HGDEK(0.1)HHSS…	YSSFSSVNK(-3.34)YGK(3.34)HGDEK(-30.04)HHSSK(-50.96);YSSFSSVNK(-6.38)YGK(6.38)HGDEK(-15.58)HHSSK(-29.48);YSSFSSVNK(-13.06)YGK(2.98)HGDEK(-2.98)HHSSK(-37.36);YSSFSSVNK(-29.31)YGK(25.99)HGDEK(-25.99)HHSSK(-62.55);YSSFSSVNK(-16.2)YGK(16.2)HGDEK(-27.03)HHSSK(-45.54);YSSFSSVNK(-17.95)YGK(17.95)HGDEK(-26.39)HHSSK(-62.14);YSSFSSVNK(-4.77)YGK(4.77)HGDEK(-20.95)HHSSK(-33.44);YSSFSSVNK(-11.35)YGK(11.35)HGDE…	Y(0.044)S(0.053)S(0.836)FS(0.053)S(0.013)VNKYGKHGDEKHHSSK;Y(0.008)S(0.018)S(0.961)FS(0.01)S(0.002)VNKYGKHGDEKHHSSK;Y(0.004)S(0.038)S(0.953)FS(0.004)S(0.001)VNKYGKHGDEKHHSSK;Y(0.005)S(0.006)S(0.786)FS(0.17)S(0.032)VNKY(0.001)GKHGDEKHHSSK;Y(0.049)S(0.055)S(0.787)FS(0.5)S(0.5)VNKY(0.108)GKHGDEKHHSSK;Y(0.029)S(0.05)S(0.879)FS(0.337)S(0.703)VNKY(0.002)GKHGDEKHHSSK;Y(0.065)S(0.075)S(0.773)FS(0.543)S(0.…	Y(-12.82)S(-11.97)S(11.97)FS(-11.97)S(-18.09)VNKY(-44.35)GKHGDEKHHS(-72.06)S(-74.42)K;Y(-20.59)S(-17.25)S(17.25)FS(-19.66)S(-26.12)VNKY(-54.15)GKHGDEKHHS(-85.47)S(-87.9)K;Y(-24.3)S(-14.02)S(14.02)FS(-23.53)S(-30.42)VNKY(-54.64)GKHGDEKHHS(-85.03)S(-85.38)K;Y(-21.94)S(-21.18)S(6.7)FS(-6.7)S(-14.07)VNKY(-30.09)GKHGDEKHHS(-74.15)S(-76.87)K;Y(-13.15)S(-12.51)S(6.03)FS(0)S(0)VNKY(-7.4)GKHGDEKHHS(-53.72…	_YSSFSSVNKYGK(bi)HGDEKHHSSK_;_YSSFSSVNKYGKHGDEK(bi)HHSSK_;_YSS(ph)FSSVNKYGK(bi)HGDEKHHSSK_;_YSS(ph)FS(ph)SVNK(bi)YGKHGDEKHHSSK_;_YSS(ph)FSS(ph)VNKYGK(bi)HGDEKHHSSK_;_YSS(ph)FS(ph)SVNKYGK(bi)HGDEKHHSSK_;_YSSFSSVNK(bi)YGKHGDEK(bi)HHSSK_;_YSSFSSVNK(bi)YGK(bi)HGDEKHHSSK_;_YSSFSSVNKYGK(bi)HGDEK(bi)HHSSK_;_YSSFSSVNKYGK(bi)HGDEKHHSSK(bi)_;_YSS(ph)FSSVNKYGK(bi)HGDEK(bi)HHSSK_;_YSS(ph)FSSVNK(bi)YGK(bi)HGD…
P20794	Homo sapiens			Serine/threonine-protein kinase MAK	MAK													2 Biotin (K);Phospho (STY)	1	2			0	0.0014558	120.59	36.712	1	3	3	2252.16	36.267	EVKSLKKLNHANVIK	56	NaN	NaN	NaN		NaN	NaN	NaN
PF3D7_0202000	P. falciparum	knob-associated histidine-rich protein	KAHRP															2 Biotin (K);Phospho (STY)	1	2			0	0.02252	88.574	48.332	1	3	3	2543.13	20.424	EASTSKEATKEASTSKGATK	117	NaN	NaN	NaN		NaN	NaN	NaN
PF3D7_0725000	P. falciparum	exonuclease I, putative	N/A															2 Biotin (K);Phospho (STY)	1	2			0	0.01226	128.54	20.547	2	2	2	1991.9	28.588	TKSIVNSNNNNKK	216	NaN	NaN	NaN		NaN	NaN	NaN
PF3D7_1105100	P. falciparum	histone H2B	H2B			22.9539												2 Oxidation (M)	0	0			8125000	6.8307e-05	127.05	71.791	1	2	0	1806.82	34.375	SMNIMNSFLVDTFEK	314	NaN	NaN	NaN		NaN	NaN	NaN
PF3D7_0730900	P. falciparum	EMP1-trafficking protein										22.5935	22.3069	22.617	22.8976	22.211		2 Oxidation (M);3 Biotin (K)	0	3			30619000	3.44e-25	207.16	159.1	12	3	3	2888.29	25.944	EMSIHDGMKGQKYGSKNIR	222	1	216.34	216.336	+	NaN	NaN	NaN		1560	1578	_EMSIHDGMKGQK(bi)YGSK(bi)NIR_;_EMSIHDGMKGQK(bi)YGSK(bi)NIR_;_EMSIHDGMKGQK(bi)YGSK(bi)NIR_;_EMSIHDGMKGQK(bi)YGSK(bi)NIR_;_EMSIHDGMKGQK(bi)YGSK(bi)NIR_;_EMSIHDGMKGQK(bi)YGSK(bi)NIR_;_EMSIHDGMKGQK(bi)YGSK(bi)NIR_;_EMSIHDGMKGQK(bi)YGSK(bi)NIR_;_EM(ox)SIHDGM(ox)K(bi)GQK(bi)YGSK(bi)NIR_;_EM(ox)SIHDGM(ox)K(bi)GQK(bi)YGSK(bi)NIR_;_EM(ox)SIHDGM(ox)K(bi)GQK(bi)YGSK(bi)NIR_;_EM(ox)SIHDGM(ox)K(bi)GQK(bi)YGSK…	EMSIHDGMKGQK(1)YGSK(1)NIR;EMSIHDGMKGQK(1)YGSK(1)NIR;EMSIHDGMKGQK(1)YGSK(1)NIR;EMSIHDGMK(0.002)GQK(0.998)YGSK(1)NIR;EMSIHDGMKGQK(1)YGSK(1)NIR;EMSIHDGMK(0.001)GQK(0.999)YGSK(1)NIR;EMSIHDGMKGQK(1)YGSK(1)NIR;EMSIHDGMK(0.002)GQK(0.998)YGSK(1)NIR;EMSIHDGMK(1)GQK(1)YGSK(1)NIR;EMSIHDGMK(1)GQK(1)YGSK(1)NIR;EMSIHDGMK(1)GQK(1)YGSK(1)NIR;EMSIHDGMK(1)GQK(1)YGSK(1)NIR;EMSIHDGMK(1)GQK(1)YGSK(1)NIR;EMSIHDGMK(1)G…	EMSIHDGMK(-55.38)GQK(55.38)YGSK(103.11)NIR;EMSIHDGMK(-39.23)GQK(39.23)YGSK(72.1)NIR;EMSIHDGMK(-41.12)GQK(41.12)YGSK(74.79)NIR;EMSIHDGMK(-26.96)GQK(26.96)YGSK(62.63)NIR;EMSIHDGMK(-33.15)GQK(33.15)YGSK(79.06)NIR;EMSIHDGMK(-31.37)GQK(31.37)YGSK(65.15)NIR;EMSIHDGMK(-35)GQK(35)YGSK(100.28)NIR;EMSIHDGMK(-26.1)GQK(26.1)YGSK(61.95)NIR;EMSIHDGMK(133.94)GQK(133.94)YGSK(133.94)NIR;EMSIHDGMK(169.58)GQK(169.5…			_EMSIHDGMKGQK(bi)YGSK(bi)NIR_;_EM(ox)SIHDGM(ox)K(bi)GQK(bi)YGSK(bi)NIR_;_EM(ox)SIHDGMK(bi)GQK(bi)YGSK(bi)NIR_;_EMSIHDGM(ox)K(bi)GQK(bi)YGSK(bi)NIR_;_EMSIHDGMK(bi)GQK(bi)YGSK(bi)NIR_;_EM(ox)SIHDGMKGQK(bi)YGSK(bi)NIR_;_EMSIHDGM(ox)KGQK(bi)YGSK(bi)NIR_
PF3D7_0730900	P. falciparum	EMP1-trafficking protein										20.924		22.8638	23.5869			2 Oxidation (M);3 Biotin (K)	0	3			22176000	1.08e-06	123.54	83.543	7	3	3	2874.27	24.579	EMSIHDGMKGQKYGSKNVR	222	1	156.08	156.079	+	NaN	NaN	NaN		1176	1194	_EMSIHDGMKGQK(bi)YGSK(bi)NVR_;_EMSIHDGMKGQK(bi)YGSK(bi)NVR_;_EMSIHDGMKGQK(bi)YGSK(bi)NVR_;_EMSIHDGMKGQK(bi)YGSK(bi)NVR_;_EMSIHDGMKGQK(bi)YGSK(bi)NVR_;_EMSIHDGMKGQK(bi)YGSK(bi)NVR_;_EMSIHDGMKGQK(bi)YGSK(bi)NVR_;_EMSIHDGMKGQK(bi)YGSK(bi)NVR_;_EMSIHDGMKGQK(bi)YGSK(bi)NVR_;_EMSIHDGMKGQK(bi)YGSK(bi)NVR_;_EMSIHDGMKGQK(bi)YGSK(bi)NVR_;_EMSIHDGMK(bi)GQK(bi)YGSK(bi)NVR_;_EMSIHDGMK(bi)GQK(bi)YGSK(bi)NVR_;_…	EMSIHDGMK(0.005)GQK(0.995)YGSK(1)NVR;EMSIHDGMK(0.102)GQK(0.898)YGSK(1)NVR;EMSIHDGMKGQK(1)YGSK(1)NVR;EMSIHDGMK(0.005)GQK(0.995)YGSK(1)NVR;EMSIHDGMK(0.001)GQK(0.999)YGSK(1)NVR;EMSIHDGMKGQK(1)YGSK(1)NVR;EMSIHDGMKGQK(1)YGSK(1)NVR;EMSIHDGMK(0.006)GQK(0.994)YGSK(1)NVR;EMSIHDGMKGQK(1)YGSK(1)NVR;EMSIHDGMKGQK(1)YGSK(1)NVR;EMSIHDGMKGQK(1)YGSK(1)NVR;EMSIHDGMK(1)GQK(1)YGSK(1)NVR;EMSIHDGMK(1)GQK(1)YGSK(1)NVR;…	EMSIHDGMK(-22.85)GQK(22.85)YGSK(47.51)NVR;EMSIHDGMK(-9.43)GQK(9.43)YGSK(51.66)NVR;EMSIHDGMK(-34.58)GQK(34.58)YGSK(71.29)NVR;EMSIHDGMK(-22.81)GQK(22.81)YGSK(51.22)NVR;EMSIHDGMK(-32.11)GQK(32.11)YGSK(59.36)NVR;EMSIHDGMK(-47.54)GQK(47.54)YGSK(77.24)NVR;EMSIHDGMK(-34.94)GQK(34.94)YGSK(76.36)NVR;EMSIHDGMK(-22)GQK(22)YGSK(46.49)NVR;EMSIHDGMK(-42.47)GQK(42.47)YGSK(81.99)NVR;EMSIHDGMK(-41.06)GQK(41.06)YG…			_EMSIHDGMKGQK(bi)YGSK(bi)NVR_;_EMSIHDGMK(bi)GQK(bi)YGSK(bi)NVR_;_EM(ox)SIHDGM(ox)K(bi)GQK(bi)YGSK(bi)NVR_;_EM(ox)SIHDGMK(bi)GQK(bi)YGSK(bi)NVR_;_EMSIHDGM(ox)K(bi)GQK(bi)YGSK(bi)NVR_
P35612	Homo sapiens			Beta-adducin	ADD2							21.9165						2 Oxidation (M);Biotin (K)	0	1			3958300	0.025794	41.172	17.839	1	4	2	4276.01	38.309	ADEVEKSSSGMPIRIENPNQFVPLYTDPQEVLEMR	75	1	41.172	41.1721	+	NaN	NaN	NaN		465	499	_ADEVEK(bi)SSSGMPIRIENPNQFVPLYTDPQEVLEMR_;_ADEVEK(bi)SSSGMPIRIENPNQFVPLYTDPQEVLEMR_;_ADEVEK(bi)SSSGMPIRIENPNQFVPLYTDPQEVLEMR_;_ADEVEK(bi)SSSGMPIRIENPNQFVPLYTDPQEVLEMR_;_ADEVEK(bi)SSSGMPIRIENPNQFVPLYTDPQEVLEMR_;_ADEVEK(bi)SSSGMPIRIENPNQFVPLYTDPQEVLEMR_;_ADEVEK(bi)SSSGMPIRIENPNQFVPLYTDPQEVLEMR_;_ADEVEK(bi)SSSGMPIRIENPNQFVPLYTDPQEVLEMR_;_ADEVEK(bi)SSSGMPIRIENPNQFVPLYTDPQEVLEMR_;_ADEVEK(bi)SSSGMPIRIE…	ADEVEK(1)SSSGMPIRIENPNQFVPLYTDPQEVLEMR;ADEVEK(1)SSSGMPIRIENPNQFVPLYTDPQEVLEMR;ADEVEK(1)SSSGMPIRIENPNQFVPLYTDPQEVLEMR;ADEVEK(1)SSSGMPIRIENPNQFVPLYTDPQEVLEMR;ADEVEK(1)SSSGMPIRIENPNQFVPLYTDPQEVLEMR;ADEVEK(1)SSSGMPIRIENPNQFVPLYTDPQEVLEMR;ADEVEK(1)SSSGMPIRIENPNQFVPLYTDPQEVLEMR;ADEVEK(1)SSSGMPIRIENPNQFVPLYTDPQEVLEMR;ADEVEK(1)SSSGMPIRIENPNQFVPLYTDPQEVLEMR;ADEVEK(1)SSSGMPIRIENPNQFVPLYTDPQEVLEMR	ADEVEK(56.48)SSSGMPIRIENPNQFVPLYTDPQEVLEMR;ADEVEK(53.37)SSSGMPIRIENPNQFVPLYTDPQEVLEMR;ADEVEK(73.27)SSSGMPIRIENPNQFVPLYTDPQEVLEMR;ADEVEK(60.88)SSSGMPIRIENPNQFVPLYTDPQEVLEMR;ADEVEK(56.21)SSSGMPIRIENPNQFVPLYTDPQEVLEMR;ADEVEK(90.46)SSSGMPIRIENPNQFVPLYTDPQEVLEMR;ADEVEK(46.06)SSSGMPIRIENPNQFVPLYTDPQEVLEMR;ADEVEK(55.96)SSSGMPIRIENPNQFVPLYTDPQEVLEMR;ADEVEK(73.87)SSSGMPIRIENPNQFVPLYTDPQEVLEMR;ADEVEK(41.17…			_ADEVEK(bi)SSSGMPIRIENPNQFVPLYTDPQEVLEMR_;_ADEVEK(bi)SSSGM(ox)PIRIENPNQFVPLYTDPQEVLEM(ox)R_
Q08495	Homo sapiens			Dematin	DMTN	20.7091	20.7824	20.3362		22.0681		20.1995	20.6399	20.5596	20.079			2 Oxidation (M);Biotin (K)	0	1			14729000	0.0033019	122.94	37.406	11	2	1	1407.64	20.168	MILKEEMEK	474	1	228.84	82.2563	+	NaN	NaN	NaN		251	259	_MILK(bi)EEM(ox)EK_;_M(ox)ILK(bi)EEMEK_;_MILK(bi)EEM(ox)EK_;_M(ox)ILK(bi)EEMEK_;_MILK(bi)EEM(ox)EK_;_M(ox)ILK(bi)EEMEK_;_MILK(bi)EEM(ox)EK_;_M(ox)ILK(bi)EEMEK_;_MILK(bi)EEM(ox)EK_;_M(ox)ILK(bi)EEMEK_;_MILK(bi)EEM(ox)EK_;_M(ox)ILK(bi)EEMEK_;_M(ox)ILK(bi)EEMEK_;_M(ox)ILK(bi)EEMEK_;_MILK(bi)EEM(ox)EK_;_M(ox)ILK(bi)EEMEK_;_M(ox)ILK(bi)EEMEK_;_M(ox)ILK(bi)EEMEK_;_M(ox)ILK(bi)EEMEK_;_MILK(bi)EEM(ox)EK_…	MILK(1)EEMEK;MILK(1)EEMEK;MILK(1)EEMEK;MILK(1)EEMEK;MILK(1)EEMEK;MILK(1)EEMEK;MILK(1)EEMEK;MILK(1)EEMEK;MILK(1)EEMEK;MILK(1)EEMEK;MILK(1)EEMEK;MILK(1)EEMEK;MILK(1)EEMEK;MILK(1)EEMEK;MILK(1)EEMEK;MILK(1)EEMEK;MILK(1)EEMEK;MILK(1)EEMEK;MILK(1)EEMEK;MILK(1)EEMEK;MILK(1)EEMEK;MILK(1)EEMEK;MILK(1)EEMEK;MILK(1)EEMEK;MILK(1)EEMEK;MILK(1)EEMEK;MILK(1)EEMEK;MILK(1)EEMEK;MILK(1)EEMEK;MILK(1)EEMEK;MILK(0.94…	MILK(67.27)EEMEK(-67.27);MILK(60.51)EEMEK(-60.51);MILK(72.93)EEMEK(-72.93);MILK(86.6)EEMEK(-86.6);MILK(76.59)EEMEK(-76.59);MILK(69.94)EEMEK(-69.94);MILK(74.06)EEMEK(-74.06);MILK(94.39)EEMEK(-94.39);MILK(62.76)EEMEK(-62.76);MILK(104.17)EEMEK(-104.17);MILK(47.42)EEMEK(-47.42);MILK(98.72)EEMEK(-98.72);MILK(73.59)EEMEK(-73.59);MILK(80.95)EEMEK(-80.95);MILK(42.24)EEMEK(-42.24);MILK(83.9)EEMEK(-83.9);M…			_MILK(bi)EEM(ox)EK_;_M(ox)ILK(bi)EEMEK_;_MILK(bi)EEMEK_;_M(ox)ILK(bi)EEM(ox)EK_
Q13404;Q15819	Homo sapiens			Ubiquitin-conjugating enzyme E2 variant 1;Ubiquitin-conjugating enzyme E2 variant 2	UBE2V1;UBE2V2				20.5393	20.3388								2 Oxidation (M);Biotin (K)	0	1			2850000	0.025983	74.841	32.505	1	2	2	1524.69	35.121	RLMMSKENMK	478;484	NaN	NaN	NaN		NaN	NaN	NaN		126	135	_RLM(ox)MSKENM(ox)K(bi)_;_RLM(ox)MSKENM(ox)K(bi)_	RLMMSK(0.001)ENMK(0.999)	RLMMSK(-31.53)ENMK(31.53)			_RLM(ox)MSKENM(ox)K(bi)_
Q08495	Homo sapiens			Dematin	DMTN		21.0125	22.1222				20.4541		21.141	21.0019	20.319	21.2515	2 Oxidation (M);Biotin (K)	0	1			16334000	0.036692	64.407	31.481	1	3	2	2107.04	27.432	VTSNLGKMILKEEMEK	474	1	161.94	106.163	+	NaN	NaN	NaN		244	259	_VTSNLGK(bi)M(ox)ILKEEMEK_;_VTSNLGK(bi)MILKEEM(ox)EK_;_VTSNLGK(bi)M(ox)ILKEEMEK_;_VTSNLGK(bi)M(ox)ILKEEMEK_;_VTSNLGK(bi)M(ox)ILKEEMEK_;_VTSNLGK(bi)M(ox)ILKEEMEK_;_VTSNLGK(bi)M(ox)ILKEEMEK_;_VTSNLGK(bi)M(ox)ILKEEMEK_;_VTSNLGK(bi)M(ox)ILKEEMEK_;_VTSNLGK(bi)MILKEEM(ox)EK_;_VTSNLGK(bi)M(ox)ILKEEMEK_;_VTSNLGK(bi)MILKEEM(ox)EK_;_VTSNLGK(bi)M(ox)ILKEEMEK_;_VTSNLGK(bi)MILKEEM(ox)EK_;_VTSNLGK(bi)MILKEEM(o…	VTSNLGK(0.998)MILK(0.002)EEMEK;VTSNLGK(0.999)MILK(0.001)EEMEK;VTSNLGK(0.981)MILK(0.019)EEMEK;VTSNLGK(0.979)MILK(0.017)EEMEK(0.004);VTSNLGK(1)MILKEEMEK;VTSNLGK(0.995)MILK(0.005)EEMEK;VTSNLGK(0.988)MILK(0.012)EEMEK;VTSNLGK(0.983)MILK(0.017)EEMEK;VTSNLGK(0.999)MILK(0.001)EEMEK;VTSNLGK(0.999)MILK(0.001)EEMEK;VTSNLGK(1)MILKEEMEK;VTSNLGK(0.999)MILK(0.001)EEMEK;VTSNLGK(0.996)MILK(0.004)EEMEK;VTSNLGK(0.9…	VTSNLGK(27.32)MILK(-27.32)EEMEK(-39.35);VTSNLGK(28.81)MILK(-28.81)EEMEK(-55.95);VTSNLGK(17.13)MILK(-17.13)EEMEK(-52.03);VTSNLGK(18)MILK(-18)EEMEK(-24.32);VTSNLGK(34.18)MILK(-34.18)EEMEK(-77.02);VTSNLGK(24.44)MILK(-24.44)EEMEK(-42.38);VTSNLGK(19.31)MILK(-19.31)EEMEK(-54.62);VTSNLGK(18.17)MILK(-18.17)EEMEK(-33.78);VTSNLGK(29.67)MILK(-29.67)EEMEK(-75.42);VTSNLGK(30.16)MILK(-30.16)EEMEK(-51.85);VTSNL…			_VTSNLGK(bi)M(ox)ILKEEMEK_;_VTSNLGK(bi)MILKEEM(ox)EK_;_VTSNLGK(bi)MILKEEMEK_;_VTSNLGK(bi)MILK(bi)EEMEK_;_VTSNLGKM(ox)ILK(bi)EEM(ox)EK_;_VTSNLGK(bi)M(ox)ILKEEM(ox)EK_
PF3D7_0730900	P. falciparum	EMP1-trafficking protein				19.7657	19.5605	19.3592	19.4194	19.5407	20.0997	24.4614	24.989	24.1946	24.7077	24.1174	24.6811	2 Oxidation (M);Biotin (K)	0	1			153100000	0.00024358	138.24	85.202	27	NaN	1	1617.69	11.991	EMSIHDGMKGQK	222	NaN	NaN	NaN		NaN	NaN	NaN		1176	1187	_EM(ox)SIHDGM(ox)K(bi)GQK_;_EM(ox)SIHDGM(ox)K(bi)GQK_;_EM(ox)SIHDGM(ox)K(bi)GQK_;_EM(ox)SIHDGM(ox)K(bi)GQK_;_EM(ox)SIHDGM(ox)K(bi)GQK_;_EM(ox)SIHDGM(ox)K(bi)GQK_;_EM(ox)SIHDGM(ox)K(bi)GQK_;_EM(ox)SIHDGM(ox)K(bi)GQK_;_EM(ox)SIHDGM(ox)K(bi)GQK_;_EM(ox)SIHDGM(ox)K(bi)GQK_;_EM(ox)SIHDGM(ox)K(bi)GQK_;_EM(ox)SIHDGM(ox)K(bi)GQK_;_EM(ox)SIHDGM(ox)K(bi)GQK_;_EM(ox)SIHDGM(ox)K(bi)GQK_;_EM(ox)SIHDGM(ox)K(bi…	EMSIHDGMK(0.937)GQK(0.063);EMSIHDGMK(0.995)GQK(0.005);EMSIHDGMK(0.996)GQK(0.004);EMSIHDGMK(0.993)GQK(0.007);EMSIHDGMK(0.999)GQK(0.001);EMSIHDGMK(0.998)GQK(0.002);EMSIHDGMK(0.988)GQK(0.012);EMSIHDGMK(0.996)GQK(0.004);EMSIHDGMK(1)GQK;EMSIHDGMK(0.98)GQK(0.02);EMSIHDGMK(0.983)GQK(0.017);EMSIHDGMK(0.993)GQK(0.007);EMSIHDGMK(1)GQK;EMSIHDGMK(1)GQK;EMSIHDGMK(0.999)GQK(0.001);EMSIHDGMK(1)GQK;EMSIHDGMK(1)G…	EMSIHDGMK(11.76)GQK(-11.76);EMSIHDGMK(22.77)GQK(-22.77);EMSIHDGMK(23.52)GQK(-23.52);EMSIHDGMK(21.8)GQK(-21.8);EMSIHDGMK(31.52)GQK(-31.52);EMSIHDGMK(26.3)GQK(-26.3);EMSIHDGMK(19.04)GQK(-19.04);EMSIHDGMK(23.74)GQK(-23.74);EMSIHDGMK(66.25)GQK(-66.25);EMSIHDGMK(16.94)GQK(-16.94);EMSIHDGMK(17.58)GQK(-17.58);EMSIHDGMK(21.55)GQK(-21.55);EMSIHDGMK(52.74)GQK(-52.74);EMSIHDGMK(44.56)GQK(-44.56);EMSIHDGMK(2…			_EM(ox)SIHDGM(ox)K(bi)GQK_;_EMSIHDGMK(bi)GQK_;_EMSIHDGM(ox)K(bi)GQK_;_EM(ox)SIHDGMK(bi)GQK_
PF3D7_0730900	P. falciparum	EMP1-trafficking protein										24.0443	24.7129	23.7895	24.1253	23.9043	24.654	2 Oxidation (M);Biotin (K)	0	1			119680000	1.15e-06	119.8	84.175	36	4	2	2627.17	18.729	HLTDEENKVEKEMSIHDGMK	222	1	176.665	94.3335	+	NaN	NaN	NaN		1165	1184	_HLTDEENKVEK(bi)EMSIHDGM(ox)K_;_HLTDEENKVEK(bi)EM(ox)SIHDGMK_;_HLTDEENKVEK(bi)EM(ox)SIHDGMK_;_HLTDEENKVEK(bi)EMSIHDGM(ox)K_;_HLTDEENKVEK(bi)EM(ox)SIHDGMK_;_HLTDEENKVEK(bi)EMSIHDGM(ox)K_;_HLTDEENKVEK(bi)EMSIHDGM(ox)K_;_HLTDEENK(bi)VEKEMSIHDGM(ox)K_;_HLTDEENKVEK(bi)EMSIHDGM(ox)K_;_HLTDEENKVEK(bi)EMSIHDGM(ox)K_;_HLTDEENKVEK(bi)EMSIHDGM(ox)K_;_HLTDEENKVEK(bi)EM(ox)SIHDGMK_;_HLTDEENKVEK(bi)EM(ox)SIHDG…	HLTDEENKVEK(1)EMSIHDGMK;HLTDEENK(0.009)VEK(0.986)EMSIHDGMK(0.005);HLTDEENKVEK(0.996)EMSIHDGMK(0.004);HLTDEENKVEK(1)EMSIHDGMK;HLTDEENK(0.009)VEK(0.99)EMSIHDGMK;HLTDEENK(0.001)VEK(0.991)EMSIHDGMK(0.009);HLTDEENKVEK(0.999)EMSIHDGMK(0.001);HLTDEENK(1)VEKEMSIHDGMK;HLTDEENK(0.003)VEK(0.994)EMSIHDGMK(0.003);HLTDEENKVEK(0.999)EMSIHDGMK(0.001);HLTDEENKVEK(1)EMSIHDGMK;HLTDEENKVEK(0.993)EMSIHDGMK(0.007);HLT…	HLTDEENK(-46.72)VEK(46.72)EMSIHDGMK(-49.82);HLTDEENK(-20.38)VEK(20.38)EMSIHDGMK(-24.16);HLTDEENK(-38.49)VEK(26.96)EMSIHDGMK(-26.96);HLTDEENK(-53.11)VEK(52.85)EMSIHDGMK(-52.85);HLTDEENK(-20.24)VEK(20.24)EMSIHDGMK(-38.85);HLTDEENK(-30.69)VEK(20.9)EMSIHDGMK(-20.9);HLTDEENK(-35.02)VEK(35.02)EMSIHDGMK(-35.43);HLTDEENK(71.24)VEK(-71.24)EMSIHDGMK(-112.47);HLTDEENK(-25.26)VEK(25.26)EMSIHDGMK(-27.67);HLTD…			_HLTDEENKVEK(bi)EMSIHDGM(ox)K_;_HLTDEENKVEK(bi)EM(ox)SIHDGMK_;_HLTDEENK(bi)VEKEMSIHDGM(ox)K_;_HLTDEENK(bi)VEKEM(ox)SIHDGMK_;_HLTDEENKVEK(bi)EMSIHDGMK_;_HLTDEENK(bi)VEKEMSIHDGMK_;_HLTDEENKVEK(bi)EM(ox)SIHDGM(ox)K_;_HLTDEENK(bi)VEKEM(ox)SIHDGM(ox)K_;_HLTDEENK(bi)VEK(bi)EMSIHDGMK_
PF3D7_0730900	P. falciparum	EMP1-trafficking protein										23.6209	24.239	23.1496	23.5983	22.9087	23.7286	2 Oxidation (M);Biotin (K)	0	1			76440000	0.00086481	82.034	55.292	16	NaN	3	2940.34	15.955	HLTDEENKVEKEMSIHDGMKGQK	222	NaN	NaN	NaN		NaN	NaN	NaN		1165	1187	_HLTDEENKVEKEM(ox)SIHDGMKGQK(bi)_;_HLTDEENKVEKEMSIHDGM(ox)K(bi)GQK_;_HLTDEENKVEKEMSIHDGM(ox)K(bi)GQK_;_HLTDEENKVEKEMSIHDGM(ox)K(bi)GQK_;_HLTDEENKVEKEM(ox)SIHDGMK(bi)GQK_;_HLTDEENKVEKEMSIHDGM(ox)K(bi)GQK_;_HLTDEENKVEKEM(ox)SIHDGMK(bi)GQK_;_HLTDEENKVEKEMSIHDGM(ox)K(bi)GQK_;_HLTDEENKVEKEM(ox)SIHDGMK(bi)GQK_;_HLTDEENKVEKEM(ox)SIHDGMK(bi)GQK_;_HLTDEENKVEKEMSIHDGM(ox)K(bi)GQK_;_HLTDEENKVEKEMSIHDGM(ox)K…	HLTDEENKVEKEMSIHDGMK(0.436)GQK(0.564);HLTDEENKVEK(0.001)EMSIHDGMK(0.784)GQK(0.215);HLTDEENKVEK(0.001)EMSIHDGMK(0.983)GQK(0.016);HLTDEENKVEKEMSIHDGMK(0.774)GQK(0.226);HLTDEENKVEK(0.002)EMSIHDGMK(0.941)GQK(0.056);HLTDEENKVEK(0.018)EMSIHDGMK(0.767)GQK(0.215);HLTDEENKVEKEMSIHDGMK(0.853)GQK(0.147);HLTDEENKVEK(0.001)EMSIHDGMK(0.929)GQK(0.07);HLTDEENKVEK(0.002)EMSIHDGMK(0.764)GQK(0.234);HLTDEENKVEKEMSIH…	HLTDEENK(-64.33)VEK(-36.93)EMSIHDGMK(-1.11)GQK(1.11);HLTDEENK(-61.09)VEK(-32.12)EMSIHDGMK(5.61)GQK(-5.61);HLTDEENK(-55.3)VEK(-30.61)EMSIHDGMK(17.91)GQK(-17.91);HLTDEENK(-61.97)VEK(-42.68)EMSIHDGMK(5.36)GQK(-5.36);HLTDEENK(-52.16)VEK(-28.69)EMSIHDGMK(12.28)GQK(-12.28);HLTDEENK(-41.37)VEK(-16.36)EMSIHDGMK(5.53)GQK(-5.53);HLTDEENK(-35.4)VEK(-35.4)EMSIHDGMK(7.64)GQK(-7.64);HLTDEENK(-48.47)VEK(-34.2)E…			_HLTDEENKVEKEM(ox)SIHDGMKGQK(bi)_;_HLTDEENKVEKEMSIHDGM(ox)K(bi)GQK_;_HLTDEENKVEKEM(ox)SIHDGMK(bi)GQK_;_HLTDEENKVEKEMSIHDGMK(bi)GQK_;_HLTDEENKVEK(bi)EMSIHDGMKGQK_;_HLTDEENKVEKEM(ox)SIHDGM(ox)K(bi)GQK_;_HLTDEENKVEK(bi)EMSIHDGMK(bi)GQK_;_HLTDEENK(bi)VEKEMSIHDGMK(bi)GQK_;_HLTDEENKVEK(bi)EM(ox)SIHDGMK(bi)GQK_;_HLTDEENK(bi)VEKEMSIHDGM(ox)K(bi)GQK_
PF3D7_0203100	P. falciparum	protein kinase, putative										21.8933	22.6197			21.6058	21.506	2 Oxidation (M);Biotin (K)	0	1			16510000	0.0020344	100.38	40.219	8	3	3	1941.82	24.088	KDMEKEMEKEMEK	120	0.994964	100.38	26.495	+	NaN	NaN	NaN		1070	1082	_KDM(ox)EKEM(ox)EK(bi)EMEK_;_KDM(ox)EKEMEKEM(ox)EK(bi)_;_KDM(ox)EKEM(ox)EK(bi)EMEK_;_KDM(ox)EKEM(ox)EK(bi)EMEK_	KDMEK(0.012)EMEK(0.598)EMEK(0.389);KDMEK(0.01)EMEK(0.379)EMEK(0.611);KDMEK(0.001)EMEK(0.637)EMEK(0.362);KDMEK(0.001)EMEK(0.995)EMEK(0.004)	K(-48.97)DMEK(-16.98)EMEK(0.79)EMEK(-0.79);K(-52.23)DMEK(-18.45)EMEK(-2.19)EMEK(2.19);K(-48.47)DMEK(-26.59)EMEK(2.54)EMEK(-2.54);K(-74.39)DMEK(-29.2)EMEK(26.5)EMEK(-26.5)			_KDM(ox)EKEM(ox)EK(bi)EMEK_;_KDM(ox)EKEMEKEM(ox)EK(bi)_
PF3D7_0730900	P. falciparum	EMP1-trafficking protein				23.1356	23.2195	23.4041	24.0443	23.9043	23.417	26.9316	26.8741	26.7645	27.0813	26.3118	26.604	2 Oxidation (M);Biotin (K)	0	1			766720000	1.07e-11	134.42	103.01	56	NaN	2	3593.56	23.277	KGCTVHEIGFMDDDNRNTMNDTTPNVNLK	222	NaN	NaN	NaN		NaN	NaN	NaN		1712	1740	_K(bi)GCTVHEIGFM(ox)DDDNRNTM(ox)NDTTPNVNLK_;_K(bi)GCTVHEIGFM(ox)DDDNRNTM(ox)NDTTPNVNLK_;_K(bi)GCTVHEIGFM(ox)DDDNRNTM(ox)NDTTPNVNLK_;_K(bi)GCTVHEIGFM(ox)DDDNRNTM(ox)NDTTPNVNLK_;_K(bi)GCTVHEIGFM(ox)DDDNRNTM(ox)NDTTPNVNLK_;_K(bi)GCTVHEIGFM(ox)DDDNRNTM(ox)NDTTPNVNLK_;_K(bi)GCTVHEIGFM(ox)DDDNRNTM(ox)NDTTPNVNLK_;_K(bi)GCTVHEIGFM(ox)DDDNRNTM(ox)NDTTPNVNLK_;_K(bi)GCTVHEIGFM(ox)DDDNRNTM(ox)NDTTPNVNLK_;_K(…	K(1)GCTVHEIGFMDDDNRNTMNDTTPNVNLK;K(1)GCTVHEIGFMDDDNRNTMNDTTPNVNLK;K(1)GCTVHEIGFMDDDNRNTMNDTTPNVNLK;K(1)GCTVHEIGFMDDDNRNTMNDTTPNVNLK;K(1)GCTVHEIGFMDDDNRNTMNDTTPNVNLK;K(1)GCTVHEIGFMDDDNRNTMNDTTPNVNLK;K(1)GCTVHEIGFMDDDNRNTMNDTTPNVNLK;K(1)GCTVHEIGFMDDDNRNTMNDTTPNVNLK;K(1)GCTVHEIGFMDDDNRNTMNDTTPNVNLK;K(1)GCTVHEIGFMDDDNRNTMNDTTPNVNLK;K(1)GCTVHEIGFMDDDNRNTMNDTTPNVNLK;K(1)GCTVHEIGFMDDDNRNTMNDTTPNVNLK;K(1…	K(82.13)GCTVHEIGFMDDDNRNTMNDTTPNVNLK(-82.13);K(67.83)GCTVHEIGFMDDDNRNTMNDTTPNVNLK(-67.83);K(122.96)GCTVHEIGFMDDDNRNTMNDTTPNVNLK(-122.96);K(101.24)GCTVHEIGFMDDDNRNTMNDTTPNVNLK(-101.24);K(87.33)GCTVHEIGFMDDDNRNTMNDTTPNVNLK(-87.33);K(66.02)GCTVHEIGFMDDDNRNTMNDTTPNVNLK(-66.02);K(113.14)GCTVHEIGFMDDDNRNTMNDTTPNVNLK(-113.14);K(85.22)GCTVHEIGFMDDDNRNTMNDTTPNVNLK(-85.22);K(48.37)GCTVHEIGFMDDDNRNTMNDTTPNV…			_K(bi)GCTVHEIGFM(ox)DDDNRNTM(ox)NDTTPNVNLK_;_K(bi)GCTVHEIGFM(ox)DDDNRNTMNDTTPNVNLK_;_K(bi)GCTVHEIGFMDDDNRNTM(ox)NDTTPNVNLK_;_K(bi)GCTVHEIGFMDDDNRNTMNDTTPNVNLK_
PF3D7_0730900	P. falciparum	EMP1-trafficking protein										22.4099	23.3101	22.4876	21.9849			2 Oxidation (M);Biotin (K)	0	1			25973000	0.0082925	55.852	29.723	3	NaN	3	3862.75	22.665	LRKGCTVHEIGFMDDDNRNTMNDTTPNVNLK	222	1	132.26	129.818	+	NaN	NaN	NaN		1710	1740	_LRK(bi)GCTVHEIGFMDDDNRNTMNDTTPNVNLK_;_LRK(bi)GCTVHEIGFMDDDNRNTMNDTTPNVNLK_;_LRK(bi)GCTVHEIGFMDDDNRNTMNDTTPNVNLK_;_LRK(bi)GCTVHEIGFMDDDNRNTMNDTTPNVNLK_;_LRK(bi)GCTVHEIGFMDDDNRNTMNDTTPNVNLK_;_LRK(bi)GCTVHEIGFMDDDNRNTMNDTTPNVNLK_;_LRK(bi)GCTVHEIGFMDDDNRNTMNDTTPNVNLK_;_LRK(bi)GCTVHEIGFMDDDNRNTMNDTTPNVNLK_;_LRK(bi)GCTVHEIGFMDDDNRNTMNDTTPNVNLK_;_LRK(bi)GCTVHEIGFMDDDNRNTMNDTTPNVNLK_;_LRK(bi)GCTVHEIGFMD…	LRK(1)GCTVHEIGFMDDDNRNTMNDTTPNVNLK;LRK(1)GCTVHEIGFMDDDNRNTMNDTTPNVNLK;LRK(1)GCTVHEIGFMDDDNRNTMNDTTPNVNLK;LRK(1)GCTVHEIGFMDDDNRNTMNDTTPNVNLK;LRK(1)GCTVHEIGFMDDDNRNTMNDTTPNVNLK;LRK(1)GCTVHEIGFMDDDNRNTMNDTTPNVNLK;LRK(1)GCTVHEIGFMDDDNRNTMNDTTPNVNLK;LRK(1)GCTVHEIGFMDDDNRNTMNDTTPNVNLK;LRK(1)GCTVHEIGFMDDDNRNTMNDTTPNVNLK;LRK(1)GCTVHEIGFMDDDNRNTMNDTTPNVNLK;LRK(1)GCTVHEIGFMDDDNRNTMNDTTPNVNLK;LRK(1)GCTVHEIG…	LRK(50.13)GCTVHEIGFMDDDNRNTMNDTTPNVNLK(-50.13);LRK(91.41)GCTVHEIGFMDDDNRNTMNDTTPNVNLK(-91.41);LRK(101.86)GCTVHEIGFMDDDNRNTMNDTTPNVNLK(-101.86);LRK(44.99)GCTVHEIGFMDDDNRNTMNDTTPNVNLK(-44.99);LRK(48.59)GCTVHEIGFMDDDNRNTMNDTTPNVNLK(-48.59);LRK(72.32)GCTVHEIGFMDDDNRNTMNDTTPNVNLK(-72.32);LRK(84.23)GCTVHEIGFMDDDNRNTMNDTTPNVNLK(-84.23);LRK(111.02)GCTVHEIGFMDDDNRNTMNDTTPNVNLK(-111.02);LRK(83.85)GCTVHEIGF…			_LRK(bi)GCTVHEIGFMDDDNRNTMNDTTPNVNLK_;_LRK(bi)GCTVHEIGFMDDDNRNTM(ox)NDTTPNVNLK_;_LRK(bi)GCTVHEIGFM(ox)DDDNRNTMNDTTPNVNLK_;_LRK(bi)GCTVHEIGFM(ox)DDDNRNTM(ox)NDTTPNVNLK_
PF3D7_0730900	P. falciparum	EMP1-trafficking protein										22.6343	21.3535				22.7024	2 Oxidation (M);Biotin (K)	0	1			16015000	1.5e-16	160.67	107.11	6	3	1	2770.2	21.006	MNTYDGMNNKVNTTNNTPNEIK	222	1	214.42	154.801	+	NaN	NaN	NaN		356	377	_M(ox)NTYDGMNNK(bi)VNTTNNTPNEIK_;_M(ox)NTYDGMNNK(bi)VNTTNNTPNEIK_;_MNTYDGM(ox)NNK(bi)VNTTNNTPNEIK_;_M(ox)NTYDGMNNK(bi)VNTTNNTPNEIK_;_MNTYDGM(ox)NNK(bi)VNTTNNTPNEIK_;_M(ox)NTYDGMNNK(bi)VNTTNNTPNEIK_;_MNTYDGM(ox)NNK(bi)VNTTNNTPNEIK_;_MNTYDGM(ox)NNK(bi)VNTTNNTPNEIK_;_MNTYDGM(ox)NNK(bi)VNTTNNTPNEIK_;_M(ox)NTYDGMNNK(bi)VNTTNNTPNEIK_;_MNTYDGM(ox)NNK(bi)VNTTNNTPNEIK_;_M(ox)NTYDGMNNK(bi)VNTTNNTPNEIK_;_MN…	MNTYDGMNNK(1)VNTTNNTPNEIK;MNTYDGMNNK(1)VNTTNNTPNEIK;MNTYDGMNNK(1)VNTTNNTPNEIK;MNTYDGMNNK(1)VNTTNNTPNEIK;MNTYDGMNNK(1)VNTTNNTPNEIK;MNTYDGMNNK(1)VNTTNNTPNEIK;MNTYDGMNNK(1)VNTTNNTPNEIK;MNTYDGMNNK(1)VNTTNNTPNEIK;MNTYDGMNNK(1)VNTTNNTPNEIK;MNTYDGMNNK(1)VNTTNNTPNEIK;MNTYDGMNNK(1)VNTTNNTPNEIK;MNTYDGMNNK(1)VNTTNNTPNEIK;MNTYDGMNNK(1)VNTTNNTPNEIK;MNTYDGMNNK(1)VNTTNNTPNEIK;MNTYDGMNNK(1)VNTTNNTPNEIK;MNTYDGMNN…	MNTYDGMNNK(85.24)VNTTNNTPNEIK(-85.24);MNTYDGMNNK(82.66)VNTTNNTPNEIK(-82.66);MNTYDGMNNK(83)VNTTNNTPNEIK(-83);MNTYDGMNNK(77.81)VNTTNNTPNEIK(-77.81);MNTYDGMNNK(101.14)VNTTNNTPNEIK(-101.14);MNTYDGMNNK(75.8)VNTTNNTPNEIK(-75.8);MNTYDGMNNK(50.82)VNTTNNTPNEIK(-50.82);MNTYDGMNNK(74.98)VNTTNNTPNEIK(-74.98);MNTYDGMNNK(122.6)VNTTNNTPNEIK(-122.6);MNTYDGMNNK(56.45)VNTTNNTPNEIK(-56.45);MNTYDGMNNK(92.64)VNTTNNTP…			_M(ox)NTYDGMNNK(bi)VNTTNNTPNEIK_;_MNTYDGM(ox)NNK(bi)VNTTNNTPNEIK_;_M(ox)NTYDGM(ox)NNK(bi)VNTTNNTPNEIK_;_MNTYDGMNNK(bi)VNTTNNTPNEIK_
PF3D7_1224300	P. falciparum	polyadenylate-binding protein, putative													20.6705			2 Oxidation (M);Biotin (K)	0	1			1668900	0.011858	61.015	7.4506	2	3	1	2626.24	28.007	NMGNLGNMNNQKQLPLNINNK	361	1	108.75	83.6714	+	NaN	NaN	NaN		706	726	_NMGNLGNM(ox)NNQK(bi)QLPLNINNK_;_NMGNLGNM(ox)NNQK(bi)QLPLNINNK_;_NM(ox)GNLGNMNNQK(bi)QLPLNINNK_;_NM(ox)GNLGNMNNQK(bi)QLPLNINNK_;_NM(ox)GNLGNM(ox)NNQK(bi)QLPLNINNK_;_NM(ox)GNLGNM(ox)NNQK(bi)QLPLNINNK_;_NMGNLGNMNNQK(bi)QLPLNINNK_	NMGNLGNMNNQK(1)QLPLNINNK;NMGNLGNMNNQK(1)QLPLNINNK;NMGNLGNMNNQK(1)QLPLNINNK;NMGNLGNMNNQK(1)QLPLNINNK;NMGNLGNMNNQK(0.999)QLPLNINNK(0.001);NMGNLGNMNNQK(1)QLPLNINNK	NMGNLGNMNNQK(48.57)QLPLNINNK(-48.57);NMGNLGNMNNQK(44.95)QLPLNINNK(-44.95);NMGNLGNMNNQK(83.67)QLPLNINNK(-83.67);NMGNLGNMNNQK(44.94)QLPLNINNK(-44.94);NMGNLGNMNNQK(32.27)QLPLNINNK(-32.27);NMGNLGNMNNQK(48.34)QLPLNINNK(-48.34)			_NMGNLGNM(ox)NNQK(bi)QLPLNINNK_;_NM(ox)GNLGNMNNQK(bi)QLPLNINNK_;_NM(ox)GNLGNM(ox)NNQK(bi)QLPLNINNK_;_NMGNLGNMNNQK(bi)QLPLNINNK_
PF3D7_0730900	P. falciparum	EMP1-trafficking protein				23.5754	23.9225	23.4676		24.4362	23.2177	24.3031	24.275	23.6431	23.8858		23.4425	2 Oxidation (M);Biotin (K)	0	1			153510000	1.26e-07	92.165	64.642	23	4	3	4268.94	29.861	NNSDGGINKDFGTKGSVINEIKDNNMNNENMQLGTTK	222	1	98.552	67.7486	+	NaN	NaN	NaN		1017	1053	_NNSDGGINKDFGTK(bi)GSVINEIKDNNM(ox)NNENM(ox)QLGTTK_;_NNSDGGINKDFGTK(bi)GSVINEIKDNNM(ox)NNENM(ox)QLGTTK_;_NNSDGGINKDFGTK(bi)GSVINEIKDNNM(ox)NNENM(ox)QLGTTK_;_NNSDGGINK(bi)DFGTKGSVINEIKDNNM(ox)NNENM(ox)QLGTTK_;_NNSDGGINKDFGTK(bi)GSVINEIKDNNM(ox)NNENM(ox)QLGTTK_;_NNSDGGINK(bi)DFGTKGSVINEIKDNNM(ox)NNENM(ox)QLGTTK_;_NNSDGGINKDFGTK(bi)GSVINEIKDNNM(ox)NNENM(ox)QLGTTK_;_NNSDGGINKDFGTK(bi)GSVINEIKDNNM(ox)…	NNSDGGINK(0.102)DFGTK(0.89)GSVINEIK(0.008)DNNMNNENMQLGTTK;NNSDGGINK(0.023)DFGTK(0.974)GSVINEIK(0.003)DNNMNNENMQLGTTK;NNSDGGINK(0.122)DFGTK(0.864)GSVINEIK(0.014)DNNMNNENMQLGTTK;NNSDGGINK(0.615)DFGTK(0.384)GSVINEIK(0.001)DNNMNNENMQLGTTK;NNSDGGINK(0.005)DFGTK(0.993)GSVINEIK(0.002)DNNMNNENMQLGTTK;NNSDGGINK(0.916)DFGTK(0.084)GSVINEIKDNNMNNENMQLGTTK;NNSDGGINK(0.02)DFGTK(0.976)GSVINEIK(0.004)DNNMNNENMQL…	NNSDGGINK(-9.43)DFGTK(9.43)GSVINEIK(-20.35)DNNMNNENMQLGTTK(-59.02);NNSDGGINK(-16.28)DFGTK(16.28)GSVINEIK(-24.87)DNNMNNENMQLGTTK(-65.1);NNSDGGINK(-8.5)DFGTK(8.5)GSVINEIK(-17.86)DNNMNNENMQLGTTK(-38.4);NNSDGGINK(2.05)DFGTK(-2.05)GSVINEIK(-29.02)DNNMNNENMQLGTTK(-55.64);NNSDGGINK(-22.88)DFGTK(22.88)GSVINEIK(-26.5)DNNMNNENMQLGTTK(-68.85);NNSDGGINK(10.4)DFGTK(-10.4)GSVINEIK(-43.46)DNNMNNENMQLGTTK(-72.52…			_NNSDGGINKDFGTK(bi)GSVINEIKDNNM(ox)NNENM(ox)QLGTTK_;_NNSDGGINK(bi)DFGTKGSVINEIKDNNM(ox)NNENM(ox)QLGTTK_;_NNSDGGINKDFGTK(bi)GSVINEIKDNNMNNENM(ox)QLGTTK_;_NNSDGGINKDFGTK(bi)GSVINEIKDNNM(ox)NNENMQLGTTK_;_NNSDGGINKDFGTK(bi)GSVINEIKDNNMNNENMQLGTTK_;_NNSDGGINK(bi)DFGTK(bi)GSVINEIKDNNM(ox)NNENMQLGTTK_;_NNSDGGINK(bi)DFGTK(bi)GSVINEIKDNNMNNENM(ox)QLGTTK_;_NNSDGGINK(bi)DFGTK(bi)GSVINEIKDNNMNNENMQLGTTK_
PF3D7_0730900	P. falciparum	EMP1-trafficking protein										24.4984	24.9134	23.3778	24.217	24.1015	24.1565	2 Oxidation (M);Biotin (K)	0	1			122370000	0.00030929	95.307	61.64	16	NaN	3	3032.37	18.763	NYKHLTDEENKVEKEMSIHDGMK	222	1	116.27	83.319	+	NaN	NaN	NaN		1162	1184	_NYK(bi)HLTDEENKVEKEMSIHDGM(ox)K_;_NYK(bi)HLTDEENKVEKEMSIHDGM(ox)K_;_NYK(bi)HLTDEENKVEKEMSIHDGM(ox)K_;_NYK(bi)HLTDEENKVEKEMSIHDGM(ox)K_;_NYK(bi)HLTDEENKVEKEMSIHDGM(ox)K_;_NYK(bi)HLTDEENKVEKEM(ox)SIHDGMK_;_NYK(bi)HLTDEENKVEKEM(ox)SIHDGMK_;_NYK(bi)HLTDEENKVEKEMSIHDGM(ox)K_;_NYK(bi)HLTDEENKVEKEMSIHDGM(ox)K_;_NYK(bi)HLTDEENKVEKEMSIHDGM(ox)K_;_NYK(bi)HLTDEENKVEKEM(ox)SIHDGMK_;_NYK(bi)HLTDEENKVEKEMSIHD…	NYK(1)HLTDEENKVEKEMSIHDGMK;NYK(0.999)HLTDEENK(0.001)VEK(0.001)EMSIHDGMK;NYK(1)HLTDEENKVEKEMSIHDGMK;NYK(1)HLTDEENKVEKEMSIHDGMK;NYK(0.999)HLTDEENK(0.001)VEKEMSIHDGMK;NYK(1)HLTDEENKVEKEMSIHDGMK;NYK(1)HLTDEENKVEKEMSIHDGMK;NYK(1)HLTDEENKVEKEMSIHDGMK;NYK(1)HLTDEENKVEKEMSIHDGMK;NYK(1)HLTDEENKVEKEMSIHDGMK;NYK(1)HLTDEENKVEKEMSIHDGMK;NYK(0.999)HLTDEENK(0.001)VEKEMSIHDGMK;NYK(1)HLTDEENKVEKEMSIHDGMK;NYK(0.99…	NYK(53.87)HLTDEENK(-53.87)VEK(-78.28)EMSIHDGMK(-97.48);NYK(32.27)HLTDEENK(-32.27)VEK(-32.27)EMSIHDGMK(-49.45);NYK(49.46)HLTDEENK(-49.46)VEK(-54.76)EMSIHDGMK(-74.56);NYK(37.64)HLTDEENK(-37.64)VEK(-44.51)EMSIHDGMK(-67.72);NYK(29.34)HLTDEENK(-29.34)VEK(-46.9)EMSIHDGMK(-68.82);NYK(59.76)HLTDEENK(-59.76)VEK(-63.03)EMSIHDGMK(-79.93);NYK(51.21)HLTDEENK(-51.21)VEK(-55.49)EMSIHDGMK(-60.05);NYK(92.29)HLTDE…			_NYK(bi)HLTDEENKVEKEMSIHDGM(ox)K_;_NYK(bi)HLTDEENKVEKEM(ox)SIHDGMK_;_NYK(bi)HLTDEENKVEKEMSIHDGMK_;_NYKHLTDEENKVEK(bi)EMSIHDGMK_;_NYKHLTDEENK(bi)VEKEMSIHDGMK_;_NYK(bi)HLTDEENKVEKEM(ox)SIHDGM(ox)K_;_NYK(bi)HLTDEENKVEK(bi)EM(ox)SIHDGM(ox)K_;_NYK(bi)HLTDEENKVEK(bi)EMSIHDGMK_;_NYK(bi)HLTDEENK(bi)VEKEMSIHDGMK_;_NYK(bi)HLTDEENK(bi)VEKEMSIHDGM(ox)K_
PF3D7_0201900	P. falciparum	erythrocyte membrane protein 3					20.1177	20.2412	20.6135	20.4342	20.5644							2 Oxidation (M);Biotin (K)	0	1			6948900	0.0035497	119.75	77.409	10	3	2	1433.68	14.103	RPMMVKMQR	116	1	119.75	119.747	+	NaN	NaN	NaN		279	287	_RPM(ox)MVK(bi)MQR_;_RPMMVK(bi)M(ox)QR_;_RPM(ox)MVK(bi)MQR_;_RPM(ox)MVK(bi)MQR_;_RPMM(ox)VK(bi)MQR_;_RPM(ox)MVK(bi)MQR_;_RPM(ox)MVK(bi)MQR_;_RPM(ox)MVK(bi)MQR_;_RPMMVK(bi)M(ox)QR_;_RPMMVK(bi)M(ox)QR_;_RPMMVK(bi)M(ox)QR_;_RPMMVK(bi)M(ox)QR_;_RPM(ox)MVK(bi)MQR_;_RPMMVK(bi)M(ox)QR_;_RPMMVK(bi)MQR_;_RPMMVK(bi)MQR_;_RPMMVK(bi)MQR_;_RPMMVK(bi)MQR_;_RPMMVK(bi)MQR_;_RPMMVK(bi)MQR_;_RPMM(ox)VK(bi)M(ox)QR_…	RPMMVK(1)MQR;RPMMVK(1)MQR;RPMMVK(1)MQR;RPMMVK(1)MQR;RPMMVK(1)MQR;RPMMVK(1)MQR;RPMMVK(1)MQR;RPMMVK(1)MQR;RPMMVK(1)MQR;RPMMVK(1)MQR;RPMMVK(1)MQR;RPMMVK(1)MQR;RPMMVK(1)MQR;RPMMVK(1)MQR;RPMMVK(1)MQR;RPMMVK(1)MQR;RPMMVK(1)MQR;RPMMVK(1)MQR;RPMMVK(1)MQR;RPMMVK(1)MQR	RPMMVK(101.65)MQR;RPMMVK(111.46)MQR;RPMMVK(112.11)MQR;RPMMVK(111.46)MQR;RPMMVK(91.27)MQR;RPMMVK(91.09)MQR;RPMMVK(100.25)MQR;RPMMVK(152.11)MQR;RPMMVK(140.83)MQR;RPMMVK(117.53)MQR;RPMMVK(119.75)MQR;RPMMVK(143.7)MQR;RPMMVK(119.75)MQR;RPMMVK(94.31)MQR;RPMMVK(84)MQR;RPMMVK(92.05)MQR;RPMMVK(91.09)MQR;RPMMVK(101.46)MQR;RPMMVK(92.05)MQR;RPMMVK(119.75)MQR			_RPM(ox)MVK(bi)MQR_;_RPMMVK(bi)M(ox)QR_;_RPMM(ox)VK(bi)MQR_;_RPMMVK(bi)MQR_;_RPMM(ox)VK(bi)M(ox)QR_;_RPM(ox)MVK(bi)M(ox)QR_;_RPM(ox)M(ox)VK(bi)MQR_
PF3D7_1035200	P. falciparum	S-antigen					22.2443		22.2354									2 Oxidation (M);Biotin (K)	0	1			9906100	0.0001999	142.08	89.506	1	2	1	1577.76	42.606	SKNSIINMLIGM	306	1	201.09	201.091	+	NaN	NaN	NaN		574	585	_SK(bi)NSIINM(ox)LIGM(ox)_;_SK(bi)NSIINM(ox)LIGM(ox)_;_SK(bi)NSIINMLIGM_;_SK(bi)NSIINMLIGM_;_SK(bi)NSIINMLIGM_;_SK(bi)NSIINMLIGM_	SK(1)NSIINMLIGM;SK(1)NSIINMLIGM	SK(142.08)NSIINMLIGM;SK(201.09)NSIINMLIGM			_SK(bi)NSIINM(ox)LIGM(ox)_;_SK(bi)NSIINMLIGM_
[truncated: 3,263 more rows]
[truncated: 4 more columns]
