# Supplementary material for: PerTurboID, a targeted in situ method reveals the impact of kinase deletion on its local protein environment in the cytoadhesion complex of malaria-causing parasites
Source: eLife. 2023 Sep 22;12:e86367. doi: 10.7554/eLife.86367 (PMC10564455; doi:10.7554/eLife.86367)
Supplement: Supplementary file 4. [file elife-86367-supp4.xlsx]

## Sheet: Perturbo_sitesummary
Supplementary Table 4: KAHRP and PTP4 PerTurboID processed site-level data. See supplementary table 5 for peptide-level data. Intensities have been normalized, imputed, then averaged between peptides for each biotinylated site. Phosphorylated peptides were averaged separately.
Gene	Organism	Protein name	Gene Name	Previous ID(s) (for PF)	Biotinynation Position	Phosphorylated?	Pvalue_KAHRP	Qvalue_KAHRP	L2FC_KAHRP	Pvalue_PTP4	Qvalue_PTP4	L2FC_PTP4	Intensity.KAHRP_DMSO1_avg	Intensity.KAHRP_DMSO2_avg	Intensity.KAHRP_DMSO3_avg	Intensity.KAHRP_RAP1_avg	Intensity.KAHRP_RAP2_avg	Intensity.KAHRP_RAP3_avg	Intensity.PTP4_DMSO1_avg	Intensity.PTP4_DMSO2_avg	Intensity.PTP4_DMSO3_avg	Intensity.PTP4_RAP1_avg	Intensity.PTP4_RAP2_avg	Intensity.PTP4_RAP3_avg
E9PAV3	Homo sapiens (Human)	Nascent polypeptide-associated complex subunit alpha, muscle-specific form (Alpha-NAC, muscle-specific form) (skNAC)	NACA	0	1963	0	NA	NA	NA	NA	NA	NA	NA	NA	NA	NA	NA	NA	NA	NA	NA	NA	NA	NA
O00178	Homo sapiens (Human)	GTP-binding protein 1 (G-protein 1) (GP-1) (GP1)	GTPBP1	0	258	0	NA	NA	NA	NA	NA	NA	NA	NA	NA	NA	NA	NA	NA	NA	NA	NA	NA	NA
O14717	Homo sapiens (Human)	tRNA (cytosine(38)-C(5))-methyltransferase (EC 2.1.1.204) (DNA (cytosine-5)-methyltransferase-like protein 2) (Dnmt2) (DNA methyltransferase homolog HsaIIP) (DNA MTase homolog HsaIIP) (M.HsaIIP) (PuMet)	TRDMT1 DNMT2	0	111	0	0.0373649	0.830121	0.204901	0.94611	0.00898797	0.0182119	26.3644	26.166	26.2401	26.4501	26.5244	26.4107	23.1221	23.8879	23.8394	23.5452	23.7286	23.6303
O43491	Homo sapiens (Human)	Band 4.1-like protein 2 (Erythrocyte membrane protein band 4.1-like 2) (Generally expressed protein 4.1) (4.1G)	EPB41L2	0	946	0	0.00047142	2.06426	0.840187	0.817281	0.0368368	-0.0404181	24.0456	24.1186	24.3139	25.2551	25.2497	24.4939	24.7984	25.253	25.2544	24.956	25.1697	25.0589
O43491	Homo sapiens (Human)	Band 4.1-like protein 2 (Erythrocyte membrane protein band 4.1-like 2) (Generally expressed protein 4.1) (4.1G)	EPB41L2	0	956	0	0.00357575	1.48765	2.69562	0.357394	0.165221	-1.00592	25.1313	22.5456	23.0129	26.6014	26.4612	25.7141	23.4167	25.011	24.7109	24.1038	21.7073	24.3097
O43768	Homo sapiens (Human)	Alpha-endosulfine (ARPP-19e)	ENSA	0	114	0	NA	NA	NA	NA	NA	NA	NA	NA	NA	NA	NA	NA	NA	NA	NA	NA	NA	NA
O43768	Homo sapiens (Human)	Alpha-endosulfine (ARPP-19e)	ENSA	0	89	0	NA	NA	NA	NA	NA	NA	NA	NA	NA	NA	NA	NA	NA	NA	NA	NA	NA	NA
O43768	Homo sapiens (Human)	Alpha-endosulfine (ARPP-19e)	ENSA	0	40	0	0.479379	0.18938	0.181229	NA	NA	NA	21.7774	21.6485	21.5195	21.8297	22.2113	21.4481	NA	NA	NA	NA	NA	NA
O60242	Homo sapiens (Human)	Adhesion G protein-coupled receptor B3 (Brain-specific angiogenesis inhibitor 3)	ADGRB3 BAI3 KIAA0550	0	768	1	NA	NA	NA	NA	NA	NA	NA	NA	NA	NA	NA	NA	NA	NA	NA	NA	NA	NA
O60488	Homo sapiens (Human)	Long-chain-fatty-acid--CoA ligase 4 (EC 6.2.1.3) (Arachidonate--CoA ligase) (EC 6.2.1.15) (Long-chain acyl-CoA synthetase 4) (LACS 4)	ACSL4 ACS4 FACL4 LACS4	0	670	0	0.1444	0.489997	-2.48667	NA	NA	NA	23.1814	25.5593	20.8036	20.6948	20.7473	20.6422	NA	NA	NA	NA	NA	NA
O75387	Homo sapiens (Human)	Large neutral amino acids transporter small subunit 3 (L-type amino acid transporter 3) (Prostate cancer overexpressed gene 1 protein) (Solute carrier family 43 member 1)	SLC43A1 LAT3 PB39 POV1	0	244	0	NA	NA	NA	NA	NA	NA	NA	NA	NA	NA	NA	NA	NA	NA	NA	NA	NA	NA
P00568	Homo sapiens (Human)	Adenylate kinase isoenzyme 1 (AK 1) (EC 2.7.4.3) (EC 2.7.4.6) (ATP-AMP transphosphorylase 1) (ATP:AMP phosphotransferase) (Adenylate monophosphate kinase) (Myokinase)	AK1	0	83	0	NA	NA	NA	NA	NA	NA	NA	NA	NA	NA	NA	NA	NA	NA	NA	NA	NA	NA
P00568	Homo sapiens (Human)	Adenylate kinase isoenzyme 1 (AK 1) (EC 2.7.4.3) (EC 2.7.4.6) (ATP-AMP transphosphorylase 1) (ATP:AMP phosphotransferase) (Adenylate monophosphate kinase) (Myokinase)	AK1	0	31	0	NA	NA	NA	NA	NA	NA	NA	NA	NA	NA	NA	NA	NA	NA	NA	NA	NA	NA
P00915	Homo sapiens (Human)	Carbonic anhydrase 1 (EC 4.2.1.1) (Carbonate dehydratase I) (Carbonic anhydrase B) (CAB) (Carbonic anhydrase I) (CA-I)	CA1	0	46	0	0.341804	0.269659	0.366484	NA	NA	NA	22.9897	21.9877	22.8143	23.1049	22.6796	23.1067	NA	NA	NA	NA	NA	NA
P00915	Homo sapiens (Human)	Carbonic anhydrase 1 (EC 4.2.1.1) (Carbonate dehydratase I) (Carbonic anhydrase B) (CAB) (Carbonic anhydrase I) (CA-I)	CA1	0	138	0	0.76217	0.0659193	0.094915	0.637897	0.081011	-0.226409	24.9503	25.5451	24.5151	25.2114	24.7911	25.2928	25.2547	24.3054	24.9414	24.5509	24.4208	24.8506
P00915	Homo sapiens (Human)	Carbonic anhydrase 1 (EC 4.2.1.1) (Carbonate dehydratase I) (Carbonic anhydrase B) (CAB) (Carbonic anhydrase I) (CA-I)	CA1	0	253	0	0.230975	0.368918	-0.415412	NA	NA	NA	23.2423	23.1168	23.5112	23.1714	22.9214	22.5312	NA	NA	NA	NA	NA	NA
P00918	Homo sapiens (Human)	Carbonic anhydrase 2 (EC 4.2.1.1) (Carbonate dehydratase II) (Carbonic anhydrase C) (CAC) (Carbonic anhydrase II) (CA-II)	CA2	0	45	0	0.781047	0.062688	-0.0690803	NA	NA	NA	22.3781	22.763	22.5706	22.8903	22.4147	22.1994	NA	NA	NA	NA	NA	NA
P00918	Homo sapiens (Human)	Carbonic anhydrase 2 (EC 4.2.1.1) (Carbonate dehydratase II) (Carbonic anhydrase C) (CAC) (Carbonic anhydrase II) (CA-II)	CA2	0	171	0	0.302232	0.310215	-0.404649	0.761848	0.0548272	0.103815	23.7841	22.7085	22.8662	22.6927	22.6117	22.8405	20.7136	21.6208	21.337	21.0488	21.6499	21.2841
P00918	Homo sapiens (Human)	Carbonic anhydrase 2 (EC 4.2.1.1) (Carbonate dehydratase II) (Carbonic anhydrase C) (CAC) (Carbonic anhydrase II) (CA-II)	CA2	0	158	0	0.0351597	0.8472	0.573359	0.830521	0.033568	0.102746	21.6781	20.9034	21.4143	22.1558	21.6377	21.9224	22.2484	22.2344	22.3499	21.6038	22.3803	23.1569
P02042	Homo sapiens (Human)	Hemoglobin subunit delta (Delta-globin) (Hemoglobin delta chain)	HBD	0	145	0	0.654831	0.110258	0.0715378	0.0514609	0.579622	-0.354038	26.3675	26.1202	25.9749	26.3912	26.2211	26.065	24.8812	25.1466	24.9524	24.8286	24.481	24.6085
P02549	Homo sapiens (Human)	Spectrin alpha chain, erythrocytic 1 (Erythroid alpha-spectrin)	SPTA1 SPTA	0	1909	0	0.279206	0.319364	-0.573122	0.595351	0.0901607	-0.338316	24.4743	23.4083	23.4712	23.9715	22.804	22.8591	24.2247	23.6676	24.2039	24.3399	23.5073	23.234
P02549	Homo sapiens (Human)	Spectrin alpha chain, erythrocytic 1 (Erythroid alpha-spectrin)	SPTA1 SPTA	0	6	0	0.388852	0.23877	0.326381	0.487382	0.111691	0.146649	21.9038	22.2766	23.0476	22.792	22.7056	22.7096	21.6802	21.6242	22.0867	21.857	22.1898	21.7841
P02549	Homo sapiens (Human)	Spectrin alpha chain, erythrocytic 1 (Erythroid alpha-spectrin)	SPTA1 SPTA	0	617	0	0.458532	0.201879	0.393941	NA	NA	NA	22.3658	21.3253	21.1691	22.5666	21.9403	21.535	NA	NA	NA	NA	NA	NA
P02730	Homo sapiens (Human)	Band 3 anion transport protein (Anion exchange protein 1) (AE 1) (Anion exchanger 1) (Solute carrier family 4 member 1) (CD antigen CD233)	SLC4A1 AE1 DI EPB3	0	174	0	0.552731	0.153811	0.117388	0.434605	0.135995	0.270295	23.6663	23.8596	23.5063	24.0872	23.7057	23.5915	22.2772	22.1027	22.2632	22.7826	22.7997	21.8717
P02730	Homo sapiens (Human)	Band 3 anion transport protein (Anion exchange protein 1) (AE 1) (Anion exchanger 1) (Solute carrier family 4 member 1) (CD antigen CD233)	SLC4A1 AE1 DI EPB3	0	360	0	0.631897	0.120639	0.150211	0.203365	0.26569	0.230262	25.3048	26.0999	25.5522	26.1425	25.647	25.6181	25.5555	25.2442	25.6574	25.5424	25.8016	25.8039
P02730	Homo sapiens (Human)	Band 3 anion transport protein (Anion exchange protein 1) (AE 1) (Anion exchanger 1) (Solute carrier family 4 member 1) (CD antigen CD233)	SLC4A1 AE1 DI EPB3	0	353	0	0.195286	0.414728	0.369484	0.226973	0.256936	0.324244	22.706	23.1661	22.7763	23.3983	23.4055	22.953	24.1237	23.9778	24.1139	24.2151	24.7706	24.2024
P04921	Homo sapiens (Human)	Glycophorin-C (Glycoconnectin) (Glycophorin-D) (GPD) (Glycoprotein beta) (PAS-2') (Sialoglycoprotein D) (CD antigen CD236)	GYPC GLPC GPC	0	124	0	NA	NA	NA	NA	NA	NA	NA	NA	NA	NA	NA	NA	NA	NA	NA	NA	NA	NA
P06703	Homo sapiens (Human)	Protein S100-A6 (Calcyclin) (Growth factor-inducible protein 2A9) (MLN 4) (Prolactin receptor-associated protein) (PRA) (S100 calcium-binding protein A6)	S100A6 CACY	0	47	0	0.710291	0.0874404	-0.108439	0.529055	0.102066	-0.434851	21.252	21.6409	21.8679	21.1209	21.8266	21.4879	21.6813	21.3426	20.4882	19.8532	21.6618	20.6926
P07900	Homo sapiens (Human)	Heat shock protein HSP 90-alpha (EC 3.6.4.10) (Heat shock 86 kDa) (HSP 86) (HSP86) (Lipopolysaccharide-associated protein 2) (LAP-2) (LPS-associated protein 2) (Renal carcinoma antigen NY-REN-38)	HSP90AA1 HSP90A HSPC1 HSPCA	0	615	0	NA	NA	NA	0.639586	0.081011	0.0749621	NA	NA	NA	NA	NA	NA	20.2705	20.3046	20.2364	20.5999	20.3455	20.0911
P08238	Homo sapiens (Human)	Heat shock protein HSP 90-beta (HSP 90) (Heat shock 84 kDa) (HSP 84) (HSP84)	HSP90AB1 HSP90B HSPC2 HSPCB	0	607	0	NA	NA	NA	0.639586	0.081011	0.0749621	NA	NA	NA	NA	NA	NA	20.2705	20.3046	20.2364	20.5999	20.3455	20.0911
P09105	Homo sapiens (Human)	Hemoglobin subunit theta-1 (Hemoglobin theta-1 chain) (Theta-1-globin)	HBQ1	0	41	0	0.820162	0.0512733	0.0764031	NA	NA	NA	22.0481	21.4027	21.7254	22.1268	21.3018	21.9767	NA	NA	NA	NA	NA	NA
P09651	Homo sapiens (Human)	Heterogeneous nuclear ribonucleoprotein A1 (hnRNP A1) (Helix-destabilizing protein) (Single-strand RNA-binding protein) (hnRNP core protein A1) [Cleaved into: Heterogeneous nuclear ribonucleoprotein A1, N-terminally processed]	HNRNPA1 HNRPA1	0	3	0	0.912707	0.0266328	0.0382914	NA	NA	NA	20.5809	20.4278	20.8926	20.1556	21.1885	20.672	NA	NA	NA	NA	NA	NA
P0DMV8	Homo sapiens (Human)	Heat shock 70 kDa protein 1A (Heat shock 70 kDa protein 1) (HSP70-1) (HSP70.1)	HSPA1A HSP72 HSPA1 HSX70	0	507	0	0.296138	0.313996	-0.170136	0.552842	0.0982876	-0.0962039	20.9319	20.9509	21.3017	20.7546	21.0132	20.9063	22.369	22.4758	22.4195	22.5772	22.3253	22.0734
P0DMV9	Homo sapiens (Human)	Heat shock 70 kDa protein 1B (Heat shock 70 kDa protein 2) (HSP70-2) (HSP70.2)	HSPA1B HSP72	0	507	0	0.296138	0.313996	-0.170136	0.552842	0.0982876	-0.0962039	20.9319	20.9509	21.3017	20.7546	21.0132	20.9063	22.369	22.4758	22.4195	22.5772	22.3253	22.0734
P11142	Homo sapiens (Human)	Heat shock cognate 71 kDa protein (EC 3.6.4.10) (Heat shock 70 kDa protein 8) (Lipopolysaccharide-associated protein 1) (LAP-1) (LPS-associated protein 1)	HSPA8 HSC70 HSP73 HSPA10	0	507	0	0.296138	0.313996	-0.170136	0.552842	0.0982876	-0.0962039	20.9319	20.9509	21.3017	20.7546	21.0132	20.9063	22.369	22.4758	22.4195	22.5772	22.3253	22.0734
P11166	Homo sapiens (Human)	Solute carrier family 2, facilitated glucose transporter member 1 (Glucose transporter type 1, erythrocyte/brain) (GLUT-1) (HepG2 glucose transporter)	SLC2A1 GLUT1	0	477	0	0.772245	0.0645021	0.0728378	0.85861	0.0269429	-0.0263314	28.0678	28.599	28.1488	28.3235	28.6447	28.066	25.9831	26.004	25.7197	25.6963	26.0572	25.8742
P11166	Homo sapiens (Human)	Solute carrier family 2, facilitated glucose transporter member 1 (Glucose transporter type 1, erythrocyte/brain) (GLUT-1) (HepG2 glucose transporter)	SLC2A1 GLUT1	0	477	1	NA	NA	NA	NA	NA	NA	NA	NA	NA	NA	NA	NA	NA	NA	NA	NA	NA	NA
P11171	Homo sapiens (Human)	Protein 4.1 (P4.1) (4.1R) (Band 4.1) (EPB4.1) (Erythrocyte membrane protein band 4.1)	EPB41 E41P	0	581	0	0.0949469	0.58544	0.218234	NA	NA	NA	23.05	22.8159	23.1406	23.1736	23.2638	23.2238	NA	NA	NA	NA	NA	NA
P11171	Homo sapiens (Human)	Protein 4.1 (P4.1) (4.1R) (Band 4.1) (EPB4.1) (Erythrocyte membrane protein band 4.1)	EPB41 E41P	0	818	0	0.00357575	1.48765	2.69562	0.357394	0.165221	-1.00592	25.1313	22.5456	23.0129	26.6014	26.4612	25.7141	23.4167	25.011	24.7109	24.1038	21.7073	24.3097
P11171	Homo sapiens (Human)	Protein 4.1 (P4.1) (4.1R) (Band 4.1) (EPB4.1) (Erythrocyte membrane protein band 4.1)	EPB41 E41P	0	839	0	0.408901	0.227772	0.271288	NA	NA	NA	22.8179	22.7396	21.935	22.6182	22.9085	22.7797	NA	NA	NA	NA	NA	NA
P11171	Homo sapiens (Human)	Protein 4.1 (P4.1) (4.1R) (Band 4.1) (EPB4.1) (Erythrocyte membrane protein band 4.1)	EPB41 E41P	0	842	0	0.408901	0.227772	0.271288	NA	NA	NA	22.8179	22.7396	21.935	22.6182	22.9085	22.7797	NA	NA	NA	NA	NA	NA
P11171	Homo sapiens (Human)	Protein 4.1 (P4.1) (4.1R) (Band 4.1) (EPB4.1) (Erythrocyte membrane protein band 4.1)	EPB41 E41P	0	580	0	0.222771	0.376064	0.237458	NA	NA	NA	25.7459	25.9119	26.0912	26.1567	26.3793	25.9253	NA	NA	NA	NA	NA	NA
P11171	Homo sapiens (Human)	Protein 4.1 (P4.1) (4.1R) (Band 4.1) (EPB4.1) (Erythrocyte membrane protein band 4.1)	EPB41 E41P	0	690	0	0.0530894	0.752993	-0.318954	0.394035	0.150462	-0.148368	24.5762	24.6013	24.4298	24.0912	24.1861	24.3731	24.1046	24.2602	24.1948	23.9587	24.0583	24.0974
P11171	Homo sapiens (Human)	Protein 4.1 (P4.1) (4.1R) (Band 4.1) (EPB4.1) (Erythrocyte membrane protein band 4.1)	EPB41 E41P	0	88	0	0.250468	0.347467	-0.163279	NA	NA	NA	21.5515	21.1539	21.2914	21.2157	21.1899	21.1014	NA	NA	NA	NA	NA	NA
P11171	Homo sapiens (Human)	Protein 4.1 (P4.1) (4.1R) (Band 4.1) (EPB4.1) (Erythrocyte membrane protein band 4.1)	EPB41 E41P	0	639	0	0.865289	0.0417081	-0.0288889	NA	NA	NA	20.6973	20.5328	20.9962	20.6115	20.6474	20.8808	NA	NA	NA	NA	NA	NA
P11171	Homo sapiens (Human)	Protein 4.1 (P4.1) (4.1R) (Band 4.1) (EPB4.1) (Erythrocyte membrane protein band 4.1)	EPB41 E41P	0	747	0	0.2145	0.385085	1.11059	0.0992086	0.415034	-1.60064	26.4396	26.7568	24.4095	27.0078	27.2487	26.6811	22.5622	24.8301	24.504	21.9147	22.4332	22.7466
P11171	Homo sapiens (Human)	Protein 4.1 (P4.1) (4.1R) (Band 4.1) (EPB4.1) (Erythrocyte membrane protein band 4.1)	EPB41 E41P	0	852	1	0.368368	0.245869	0.277468	0.222745	0.259466	0.241562	23.1992	23.9072	23.5532	23.4661	24.0223	24.0036	21.6548	21.9823	21.8064	21.8524	21.9961	22.3198
P11171	Homo sapiens (Human)	Protein 4.1 (P4.1) (4.1R) (Band 4.1) (EPB4.1) (Erythrocyte membrane protein band 4.1)	EPB41 E41P	0	689	0	0.288355	0.3176	0.140128	0.641132	0.081011	0.0959419	23.2816	23.3547	23.5148	23.362	23.6789	23.5306	22.7604	23.2992	23.2155	23.0875	23.106	23.3695
P11171	Homo sapiens (Human)	Protein 4.1 (P4.1) (4.1R) (Band 4.1) (EPB4.1) (Erythrocyte membrane protein band 4.1)	EPB41 E41P	0	852	0	0.381787	0.243253	0.210571	7.73818e-06	3.08024	1.19879	24.4971	24.6106	24.5765	24.5041	24.6789	25.133	22.1562	22.341	22.4863	23.5391	23.4322	23.6086
P11171	Homo sapiens (Human)	Protein 4.1 (P4.1) (4.1R) (Band 4.1) (EPB4.1) (Erythrocyte membrane protein band 4.1)	EPB41 E41P	0	753	0	0.0470892	0.78727	0.496359	0.225657	0.257472	-0.749643	26.7822	26.9545	25.7711	26.9758	27.1557	26.8655	24.3555	25.4884	25.537	24.256	24.3537	24.5222
P11171	Homo sapiens (Human)	Protein 4.1 (P4.1) (4.1R) (Band 4.1) (EPB4.1) (Erythrocyte membrane protein band 4.1)	EPB41 E41P	0	808	0	0.00047142	2.06426	0.840187	0.817281	0.0368368	-0.0404181	24.0456	24.1186	24.3139	25.2551	25.2497	24.4939	24.7984	25.253	25.2544	24.956	25.1697	25.0589
P11171	Homo sapiens (Human)	Protein 4.1 (P4.1) (4.1R) (Band 4.1) (EPB4.1) (Erythrocyte membrane protein band 4.1)	EPB41 E41P	0	589	0	NA	NA	NA	0.0626117	0.528524	-0.133492	NA	NA	NA	NA	NA	NA	19.6085	19.5463	19.6707	19.4242	19.5489	19.452
P11171	Homo sapiens (Human)	Protein 4.1 (P4.1) (4.1R) (Band 4.1) (EPB4.1) (Erythrocyte membrane protein band 4.1)	EPB41 E41P	0	680	0	NA	NA	NA	NA	NA	NA	NA	NA	NA	NA	NA	NA	NA	NA	NA	NA	NA	NA
P11171	Homo sapiens (Human)	Protein 4.1 (P4.1) (4.1R) (Band 4.1) (EPB4.1) (Erythrocyte membrane protein band 4.1)	EPB41 E41P	0	706	0	0.233942	0.365701	0.237919	0.568314	0.0982876	0.0305442	25.1176	25.2616	25.3162	25.4942	25.6229	25.292	24.8686	25.0464	24.9796	24.9369	24.9929	25.0565
P11171	Homo sapiens (Human)	Protein 4.1 (P4.1) (4.1R) (Band 4.1) (EPB4.1) (Erythrocyte membrane protein band 4.1)	EPB41 E41P	0	506	0	0.438969	0.213456	0.149551	0.978077	0.00594325	0.00815528	22.6223	22.7325	22.9294	23.1623	22.646	22.9245	22.0414	21.568	22.5259	21.9857	22.0621	22.1121
P11171	Homo sapiens (Human)	Protein 4.1 (P4.1) (4.1R) (Band 4.1) (EPB4.1) (Erythrocyte membrane protein band 4.1)	EPB41 E41P	0	673	0	0.471022	0.193637	0.445324	0.569885	0.0982876	-0.141661	22.2894	24.1482	23.6703	23.9239	23.7493	23.7707	22.9465	23.3217	23.3407	22.6873	23.3046	23.192
P11171	Homo sapiens (Human)	Protein 4.1 (P4.1) (4.1R) (Band 4.1) (EPB4.1) (Erythrocyte membrane protein band 4.1)	EPB41 E41P	0	679	0	0.471022	0.193637	0.445324	0.569885	0.0982876	-0.141661	22.2894	24.1482	23.6703	23.9239	23.7493	23.7707	22.9465	23.3217	23.3407	22.6873	23.3046	23.192
P11171	Homo sapiens (Human)	Protein 4.1 (P4.1) (4.1R) (Band 4.1) (EPB4.1) (Erythrocyte membrane protein band 4.1)	EPB41 E41P	0	499	0	0.422783	0.22026	-0.196026	0.26894	0.209201	-0.199677	22.9861	22.7862	23.304	22.8348	22.5499	23.1036	22.1179	22.2723	22.4267	21.8208	22.2348	22.1624
P11277	Homo sapiens (Human)	Spectrin beta chain, erythrocytic (Beta-I spectrin)	SPTB SPTB1	0	387	0	NA	NA	NA	NA	NA	NA	NA	NA	NA	NA	NA	NA	NA	NA	NA	NA	NA	NA
P11277	Homo sapiens (Human)	Spectrin beta chain, erythrocytic (Beta-I spectrin)	SPTB SPTB1	0	2056	0	0.147317	0.484786	0.172336	0.982093	0.00594325	-0.00879424	23.9336	24.2947	24.6853	24.8737	24.1416	24.4153	24.4198	24.5038	24.6449	24.5414	24.3014	24.6994
P11277	Homo sapiens (Human)	Spectrin beta chain, erythrocytic (Beta-I spectrin)	SPTB SPTB1	0	2077	0	0.38516	0.240596	-0.493929	0.0359555	0.664927	-0.292693	23.7362	22.2856	22.3233	22.5483	22.3492	21.9657	21.8924	22.022	22.1517	21.6395	21.7131	21.8354
P11277	Homo sapiens (Human)	Spectrin beta chain, erythrocytic (Beta-I spectrin)	SPTB SPTB1	0	598	0	0.97294	0.0080352	-0.0148822	NA	NA	NA	22.058	21.3777	22.7007	22.1285	22.237	21.7262	NA	NA	NA	NA	NA	NA
P11277	Homo sapiens (Human)	Spectrin beta chain, erythrocytic (Beta-I spectrin)	SPTB SPTB1	0	707	0	0.184225	0.425866	0.487038	0.188915	0.280486	0.525479	22.8452	22.7085	22.3487	23.6462	22.7917	22.9256	21.8037	21.8082	20.8435	22.1171	22.0752	21.8395
P11277	Homo sapiens (Human)	Spectrin beta chain, erythrocytic (Beta-I spectrin)	SPTB SPTB1	0	2070	0	0.150831	0.475415	-0.560818	0.0864395	0.444749	-0.0507124	22.8711	22.3544	21.9561	21.9488	21.9969	21.5535	22.2166	21.9249	22.2232	21.9131	22.1601	22.1395
P11908	Homo sapiens (Human)	Ribose-phosphate pyrophosphokinase 2 (EC 2.7.6.1) (PPRibP) (Phosphoribosyl pyrophosphate synthase II) (PRS-II)	PRPS2	0	282	0	NA	NA	NA	NA	NA	NA	NA	NA	NA	NA	NA	NA	NA	NA	NA	NA	NA	NA
P15170	Homo sapiens (Human)	Eukaryotic peptide chain release factor GTP-binding subunit ERF3A (Eukaryotic peptide chain release factor subunit 3a) (eRF3a) (G1 to S phase transition protein 1 homolog)	GSPT1 ERF3A	0	163	0	NA	NA	NA	NA	NA	NA	NA	NA	NA	NA	NA	NA	NA	NA	NA	NA	NA	NA
P16157	Homo sapiens (Human)	Ankyrin-1 (ANK-1) (Ankyrin-R) (Erythrocyte ankyrin)	ANK1 ANK	0	841	0	0.156161	0.464627	-0.0919437	0.119186	0.369777	0.417782	23.1874	23.889	22.5595	22.9652	23.3008	23.0942	21.847	22.2024	21.972	22.2847	22.6955	22.2946
P16157	Homo sapiens (Human)	Ankyrin-1 (ANK-1) (Ankyrin-R) (Erythrocyte ankyrin)	ANK1 ANK	0	841	1	NA	NA	NA	NA	NA	NA	NA	NA	NA	NA	NA	NA	NA	NA	NA	NA	NA	NA
P16157	Homo sapiens (Human)	Ankyrin-1 (ANK-1) (Ankyrin-R) (Erythrocyte ankyrin)	ANK1 ANK	0	1086	0	0.85153	0.042497	-0.0547756	0.000901432	1.58382	0.670029	22.4523	23.175	22.2922	22.5563	22.5356	22.6633	21.5643	21.6519	21.6169	22.1869	22.2353	22.421
P16157	Homo sapiens (Human)	Ankyrin-1 (ANK-1) (Ankyrin-R) (Erythrocyte ankyrin)	ANK1 ANK	0	1825	0	NA	NA	NA	0.60219	0.0877735	-0.200332	NA	NA	NA	NA	NA	NA	22.6833	22.7561	22.6105	21.8198	22.61	23.0191
P16157	Homo sapiens (Human)	Ankyrin-1 (ANK-1) (Ankyrin-R) (Erythrocyte ankyrin)	ANK1 ANK	0	1328	0	NA	NA	NA	0.0935635	0.429137	0.627342	NA	NA	NA	NA	NA	NA	20.6927	20.8617	21.4774	21.3821	21.6038	21.9279
P16157	Homo sapiens (Human)	Ankyrin-1 (ANK-1) (Ankyrin-R) (Erythrocyte ankyrin)	ANK1 ANK	0	849	0	0.152428	0.472102	0.924484	NA	NA	NA	24.4751	24.7279	23.1402	25.2525	25.1803	24.6839	NA	NA	NA	NA	NA	NA
P16157	Homo sapiens (Human)	Ankyrin-1 (ANK-1) (Ankyrin-R) (Erythrocyte ankyrin)	ANK1 ANK	0	801	0	0.093327	0.590855	0.222088	0.571869	0.0982876	0.115819	28.9779	28.9595	28.6971	29.0446	29.0669	29.1893	27.7386	28.0118	28.2644	27.938	28.3228	28.1015
P16157	Homo sapiens (Human)	Ankyrin-1 (ANK-1) (Ankyrin-R) (Erythrocyte ankyrin)	ANK1 ANK	0	1873	0	0.132387	0.510618	0.213544	0.758261	0.0555379	0.0940719	23.014	22.8807	23.1683	23.1396	23.1771	23.3869	21.7985	22.4999	22.3957	22.3364	22.002	22.6379
P16157	Homo sapiens (Human)	Ankyrin-1 (ANK-1) (Ankyrin-R) (Erythrocyte ankyrin)	ANK1 ANK	0	958	0	0.0563922	0.733871	-0.414639	NA	NA	NA	23.3971	22.9962	22.8921	22.7015	22.6315	22.7085	NA	NA	NA	NA	NA	NA
P16157	Homo sapiens (Human)	Ankyrin-1 (ANK-1) (Ankyrin-R) (Erythrocyte ankyrin)	ANK1 ANK	0	1826	0	NA	NA	NA	0.60219	0.0877735	-0.200332	NA	NA	NA	NA	NA	NA	22.6833	22.7561	22.6105	21.8198	22.61	23.0191
P16157	Homo sapiens (Human)	Ankyrin-1 (ANK-1) (Ankyrin-R) (Erythrocyte ankyrin)	ANK1 ANK	0	955	0	0.129739	0.515045	-0.22482	NA	NA	NA	21.0667	20.816	20.7891	20.6763	20.6084	20.7127	NA	NA	NA	NA	NA	NA
P16989	Homo sapiens (Human)	Y-box-binding protein 3 (Cold shock domain-containing protein A) (DNA-binding protein A) (Single-strand DNA-binding protein NF-GMB)	YBX3 CSDA DBPA	0	96	0	0.801174	0.0572069	-0.137896	0.333669	0.175839	-0.363365	21.6348	22.7762	21.8365	21.4626	22.6781	21.6931	22.3979	23.052	22.4003	21.9367	22.7448	22.0786
P16989	Homo sapiens (Human)	Y-box-binding protein 3 (Cold shock domain-containing protein A) (DNA-binding protein A) (Single-strand DNA-binding protein NF-GMB)	YBX3 CSDA DBPA	0	90	0	0.5058	0.175727	-0.390086	0.968461	0.00594325	0.0131719	22.3229	23.5946	22.4505	21.9404	23.0849	22.1725	23.5743	24.0587	23.6933	23.2344	24.0725	24.0589
P21980	Homo sapiens (Human)	Protein-glutamine gamma-glutamyltransferase 2 (EC 2.3.2.13) (Erythrocyte transglutaminase) (Heart G alpha(h)) (hhG alpha(h)) (Isopeptidase TGM2) (EC 3.4.-.-) (Protein G alpha(h)) (G(h)) (Protein-glutamine deamidase TGM2) (EC 3.5.1.44) (Protein-glutamine dopaminyltransferase TGM2) (EC 2.3.1.-) (Protein-glutamine histaminyltransferase TGM2) (EC 2.3.1.-) (Protein-glutamine noradrenalinyltransferase …	TGM2	0	464	0	0.973752	0.0080352	0.0293744	0.0538575	0.568628	0.107304	23.0727	22.9905	23.3326	23.5722	23.2748	22.6369	22.4709	21.638	22.6493	22.4502	22.7434	21.8865
P23528	Homo sapiens (Human)	Cofilin-1 (18 kDa phosphoprotein) (p18) (Cofilin, non-muscle isoform)	CFL1 CFL	0	22	0	NA	NA	NA	NA	NA	NA	NA	NA	NA	NA	NA	NA	NA	NA	NA	NA	NA	NA
P23588	Homo sapiens (Human)	Eukaryotic translation initiation factor 4B (eIF-4B)	EIF4B	0	395	0	0.116582	0.545621	0.39198	NA	NA	NA	20.85	20.4763	20.5962	21.3142	20.7513	21.0328	NA	NA	NA	NA	NA	NA
P23588	Homo sapiens (Human)	Eukaryotic translation initiation factor 4B (eIF-4B)	EIF4B	0	365	0	0.0767751	0.645755	0.508684	0.554898	0.0982876	-0.369061	24.4033	24.1873	24.3298	24.4055	25.0152	25.0258	23.5989	24.0179	23.9224	24.1189	22.3631	23.9501
P23634	Homo sapiens (Human)	Plasma membrane calcium-transporting ATPase 4 (PMCA4) (EC 7.2.2.10) (Matrix-remodeling-associated protein 1) (Plasma membrane calcium ATPase isoform 4) (Plasma membrane calcium pump isoform 4)	ATP2B4 ATP2B2 MXRA1	0	1194	0	NA	NA	NA	NA	NA	NA	NA	NA	NA	NA	NA	NA	NA	NA	NA	NA	NA	NA
P23634	Homo sapiens (Human)	Plasma membrane calcium-transporting ATPase 4 (PMCA4) (EC 7.2.2.10) (Matrix-remodeling-associated protein 1) (Plasma membrane calcium ATPase isoform 4) (Plasma membrane calcium pump isoform 4)	ATP2B4 ATP2B2 MXRA1	0	1197	0	NA	NA	NA	NA	NA	NA	NA	NA	NA	NA	NA	NA	NA	NA	NA	NA	NA	NA
P23763	Homo sapiens (Human)	Vesicle-associated membrane protein 1 (VAMP-1) (Synaptobrevin-1)	VAMP1 SYB1	0	54	0	0.768427	0.0645021	-0.112616	NA	NA	NA	20.9003	20.7074	21.4885	21.0276	20.4084	21.3224	NA	NA	NA	NA	NA	NA
P25786	Homo sapiens (Human)	Proteasome subunit alpha type-1 (30 kDa prosomal protein) (PROS-30) (Macropain subunit C2) (Multicatalytic endopeptidase complex subunit C2) (Proteasome component C2) (Proteasome nu chain)	PSMA1 HC2 NU PROS30 PSC2	0	115	0	0.920856	0.0251718	-0.0287544	0.172472	0.29853	0.241112	22.5717	23.0088	22.1346	22.6441	22.6439	22.3407	21.7575	22.1843	22.0812	22.3709	22.1367	22.2388
P26599	Homo sapiens (Human)	Polypyrimidine tract-binding protein 1 (PTB) (57 kDa RNA-binding protein PPTB-1) (Heterogeneous nuclear ribonucleoprotein I) (hnRNP I)	PTBP1 PTB	0	428	0	0.00177583	1.67606	-0.55444	NA	NA	NA	21.8357	21.6333	21.7345	21.0989	21.2612	21.1801	NA	NA	NA	NA	NA	NA
P27105	Homo sapiens (Human)	Stomatin (Erythrocyte band 7 integral membrane protein) (Erythrocyte membrane protein band 7.2) (Protein 7.2b)	STOM BND7 EPB72	0	235	0	NA	NA	NA	NA	NA	NA	NA	NA	NA	NA	NA	NA	NA	NA	NA	NA	NA	NA
P28289	Homo sapiens (Human)	Tropomodulin-1 (Erythrocyte tropomodulin) (E-Tmod)	TMOD1 D9S57E TMOD	0	354	0	0.162112	0.457689	-0.236515	0.18664	0.282634	-0.381388	23.6041	23.4976	23.4525	23.4283	23.3461	23.0703	23.3601	22.8695	23.4768	22.5634	23.07	22.9289
P29972	Homo sapiens (Human)	Aquaporin-1 (AQP-1) (Aquaporin-CHIP) (Urine water channel) (Water channel protein for red blood cells and kidney proximal tubule)	AQP1 CHIP28	0	269	0	0.726992	0.0807007	0.121601	NA	NA	NA	22.5304	23.0296	21.9425	22.6329	22.7584	22.4759	NA	NA	NA	NA	NA	NA
P29972	Homo sapiens (Human)	Aquaporin-1 (AQP-1) (Aquaporin-CHIP) (Urine water channel) (Water channel protein for red blood cells and kidney proximal tubule)	AQP1 CHIP28	0	267	0	0.883609	0.0354593	-0.00785222	0.836401	0.0332944	0.0683246	22.7578	23.1046	22.1322	22.7014	23.0051	22.2645	21.0705	21.8374	21.454	21.6254	21.836	21.1054
P30043	Homo sapiens (Human)	Flavin reductase (NADPH) (FR) (EC 1.5.1.30) (Biliverdin reductase B) (BVR-B) (EC 1.3.1.24) (Biliverdin-IX beta-reductase) (Green heme-binding protein) (GHBP) (NADPH-dependent diaphorase) (NADPH-flavin reductase) (FLR)	BLVRB FLR	0	178	0	NA	NA	NA	NA	NA	NA	NA	NA	NA	NA	NA	NA	NA	NA	NA	NA	NA	NA
P30613	Homo sapiens (Human)	Pyruvate kinase PKLR (EC 2.7.1.40) (Pyruvate kinase 1) (Pyruvate kinase isozymes L/R) (R-type/L-type pyruvate kinase) (Red cell/liver pyruvate kinase)	PKLR PK1 PKL	0	18	0	NA	NA	NA	NA	NA	NA	NA	NA	NA	NA	NA	NA	NA	NA	NA	NA	NA	NA
P30613	Homo sapiens (Human)	Pyruvate kinase PKLR (EC 2.7.1.40) (Pyruvate kinase 1) (Pyruvate kinase isozymes L/R) (R-type/L-type pyruvate kinase) (Red cell/liver pyruvate kinase)	PKLR PK1 PKL	0	25	0	NA	NA	NA	NA	NA	NA	NA	NA	NA	NA	NA	NA	NA	NA	NA	NA	NA	NA
P31948	Homo sapiens (Human)	Stress-induced-phosphoprotein 1 (STI1) (Hsc70/Hsp90-organizing protein) (Hop) (Renal carcinoma antigen NY-REN-11) (Transformation-sensitive protein IEF SSP 3521)	STIP1	0	523	0	0.331955	0.280675	-0.353332	0.0332768	0.677603	-0.748557	22.859	23.0372	22.1493	22.238	22.6585	22.0889	21.9398	22.2856	22.6315	21.5371	21.3231	21.7511
P31948	Homo sapiens (Human)	Stress-induced-phosphoprotein 1 (STI1) (Hsc70/Hsp90-organizing protein) (Hop) (Renal carcinoma antigen NY-REN-11) (Transformation-sensitive protein IEF SSP 3521)	STIP1	0	169	0	0.00825357	1.27624	-0.705336	0.400026	0.148034	-0.450486	21.1165	20.6968	20.9067	20.2013	20.3394	20.0633	21.1589	20.7986	22.3603	21.1265	20.9888	20.851
P31948	Homo sapiens (Human)	Stress-induced-phosphoprotein 1 (STI1) (Hsc70/Hsp90-organizing protein) (Hop) (Renal carcinoma antigen NY-REN-11) (Transformation-sensitive protein IEF SSP 3521)	STIP1	0	530	0	0.331955	0.280675	-0.353332	0.0332768	0.677603	-0.748557	22.859	23.0372	22.1493	22.238	22.6585	22.0889	21.9398	22.2856	22.6315	21.5371	21.3231	21.7511
P34931	Homo sapiens (Human)	Heat shock 70 kDa protein 1-like (Heat shock 70 kDa protein 1L) (Heat shock 70 kDa protein 1-Hom) (HSP70-Hom)	HSPA1L	0	509	0	0.296138	0.313996	-0.170136	0.552842	0.0982876	-0.0962039	20.9319	20.9509	21.3017	20.7546	21.0132	20.9063	22.369	22.4758	22.4195	22.5772	22.3253	22.0734
P35611	Homo sapiens (Human)	Alpha-adducin (Erythrocyte adducin subunit alpha)	ADD1 ADDA	0	548	0	NA	NA	NA	NA	NA	NA	NA	NA	NA	NA	NA	NA	NA	NA	NA	NA	NA	NA
P35611	Homo sapiens (Human)	Alpha-adducin (Erythrocyte adducin subunit alpha)	ADD1 ADDA	0	515	0	NA	NA	NA	NA	NA	NA	NA	NA	NA	NA	NA	NA	NA	NA	NA	NA	NA	NA
P35611	Homo sapiens (Human)	Alpha-adducin (Erythrocyte adducin subunit alpha)	ADD1 ADDA	0	543	0	NA	NA	NA	0.227408	0.256936	-0.236664	NA	NA	NA	NA	NA	NA	21.7179	21.7767	21.7473	21.7969	21.2244	21.5106
P35611	Homo sapiens (Human)	Alpha-adducin (Erythrocyte adducin subunit alpha)	ADD1 ADDA	0	21	0	NA	NA	NA	0.831187	0.033568	-0.124571	NA	NA	NA	NA	NA	NA	20.4008	20.5279	20.2855	19.2155	20.9985	20.6265
P35612	Homo sapiens (Human)	Beta-adducin (Erythrocyte adducin subunit beta)	ADD2 ADDB	0	511	0	0.943893	0.016827	-0.0595339	NA	NA	NA	22.4435	22.7611	22.0534	22.367	22.2668	22.4456	NA	NA	NA	NA	NA	NA
P35612	Homo sapiens (Human)	Beta-adducin (Erythrocyte adducin subunit beta)	ADD2 ADDB	0	527	0	NA	NA	NA	NA	NA	NA	NA	NA	NA	NA	NA	NA	NA	NA	NA	NA	NA	NA
P35612	Homo sapiens (Human)	Beta-adducin (Erythrocyte adducin subunit beta)	ADD2 ADDB	0	607	0	0.280194	0.319364	0.307871	NA	NA	NA	22.679	22.3812	23.0385	23.0572	23.2518	22.7134	NA	NA	NA	NA	NA	NA
P35612	Homo sapiens (Human)	Beta-adducin (Erythrocyte adducin subunit beta)	ADD2 ADDB	0	612	0	0.265325	0.330877	0.0281411	0.875964	0.0243094	-0.0418681	22.3319	22.1725	22.7057	22.3548	22.5212	22.4184	21.4566	21.1341	21.9587	21.3269	21.5804	21.5165
P35612	Homo sapiens (Human)	Beta-adducin (Erythrocyte adducin subunit beta)	ADD2 ADDB	0	470	0	0.672161	0.101671	0.00754375	0.203395	0.26569	0.672317	21.7826	22.1323	22.0813	21.9967	21.9606	22.0615	22.4048	21.6522	22.3793	22.73	22.7426	22.9806
P35612	Homo sapiens (Human)	Beta-adducin (Erythrocyte adducin subunit beta)	ADD2 ADDB	0	628	0	0.774701	0.063778	-0.0614256	NA	NA	NA	19.3304	19.0575	19.7253	19.2427	19.4108	19.2754	NA	NA	NA	NA	NA	NA
P35612	Homo sapiens (Human)	Beta-adducin (Erythrocyte adducin subunit beta)	ADD2 ADDB	0	575	0	0.946458	0.0160509	-0.0586989	NA	NA	NA	22.5669	21.0105	22.2119	20.6751	21.9343	23.0038	NA	NA	NA	NA	NA	NA
P35612	Homo sapiens (Human)	Beta-adducin (Erythrocyte adducin subunit beta)	ADD2 ADDB	0	459	0	NA	NA	NA	0.2527	0.223292	-0.186207	NA	NA	NA	NA	NA	NA	20.5807	20.8167	20.6987	20.5125	20.3017	20.7232
P35612	Homo sapiens (Human)	Beta-adducin (Erythrocyte adducin subunit beta)	ADD2 ADDB	0	620	0	NA	NA	NA	NA	NA	NA	NA	NA	NA	NA	NA	NA	NA	NA	NA	NA	NA	NA
P37802	Homo sapiens (Human)	Transgelin-2 (Epididymis tissue protein Li 7e) (SM22-alpha homolog)	TAGLN2 KIAA0120 CDABP0035	0	171	0	0.977881	0.00737282	-0.00296222	0.032764	0.677603	-0.274278	23.4905	24.0488	23.8981	23.4054	24.2577	23.7654	23.1889	23.1434	23.1935	22.7379	22.9471	23.018
P37840	Homo sapiens (Human)	Alpha-synuclein (Non-A beta component of AD amyloid) (Non-A4 component of amyloid precursor) (NACP)	SNCA NACP PARK1	0	12	0	0.932727	0.0212014	0.154509	0.940533	0.00954659	0.0356019	22.3025	22.4906	21.7881	22.6713	22.7964	21.5772	21.5672	22.0055	21.1001	21.6867	22.1723	20.9206
P37840	Homo sapiens (Human)	Alpha-synuclein (Non-A beta component of AD amyloid) (Non-A4 component of amyloid precursor) (NACP)	SNCA NACP PARK1	0	21	0	0.67835	0.0990628	0.298474	NA	NA	NA	21.5901	21.6969	20.9528	22.2854	22.3903	20.4595	NA	NA	NA	NA	NA	NA
P37840	Homo sapiens (Human)	Alpha-synuclein (Non-A beta component of AD amyloid) (Non-A4 component of amyloid precursor) (NACP)	SNCA NACP PARK1	0	45	0	0.646143	0.11421	0.371532	0.694839	0.0693584	-0.274017	26.7925	26.8378	26.2437	27.2196	27.4115	26.3575	27.0025	27.3366	26.5595	27.1569	26.8521	26.0676
P37840	Homo sapiens (Human)	Alpha-synuclein (Non-A beta component of AD amyloid) (Non-A4 component of amyloid precursor) (NACP)	SNCA NACP PARK1	0	97	0	0.112923	0.54889	-0.179642	NA	NA	NA	21.5306	21.3276	21.5224	21.1873	21.2647	21.3896	NA	NA	NA	NA	NA	NA
P37840	Homo sapiens (Human)	Alpha-synuclein (Non-A beta component of AD amyloid) (Non-A4 component of amyloid precursor) (NACP)	SNCA NACP PARK1	0	32	0	0.0666545	0.681175	1.16709	0.994192	0.00252986	-0.00301306	25.0646	24.2268	24.2997	26.0333	26.0955	24.9635	26.158	26.9554	26.0152	26.4892	26.5692	26.0612
P37840	Homo sapiens (Human)	Alpha-synuclein (Non-A beta component of AD amyloid) (Non-A4 component of amyloid precursor) (NACP)	SNCA NACP PARK1	0	43	0	0.494057	0.180961	0.487344	0.565699	0.0982876	-0.314476	27.2261	27.3066	26.7863	27.8589	28.0472	26.875	28.7616	29.1449	28.3021	28.8588	28.6241	27.7822
P37840	Homo sapiens (Human)	Alpha-synuclein (Non-A beta component of AD amyloid) (Non-A4 component of amyloid precursor) (NACP)	SNCA NACP PARK1	0	96	0	0.112923	0.54889	-0.179642	NA	NA	NA	21.5306	21.3276	21.5224	21.1873	21.2647	21.3896	NA	NA	NA	NA	NA	NA
P37840	Homo sapiens (Human)	Alpha-synuclein (Non-A beta component of AD amyloid) (Non-A4 component of amyloid precursor) (NACP)	SNCA NACP PARK1	0	6	0	0.795961	0.0587652	0.170093	0.893123	0.0204436	-0.0384242	24.5021	25.0344	24.7092	25.1761	25.066	24.514	23.0934	22.4252	22.3187	22.5049	23.4329	21.7842
P37840	Homo sapiens (Human)	Alpha-synuclein (Non-A beta component of AD amyloid) (Non-A4 component of amyloid precursor) (NACP)	SNCA NACP PARK1	0	58	0	0.00944244	1.23252	-0.556455	NA	NA	NA	24.9276	24.8548	24.8912	24.5374	24.3347	24.1321	NA	NA	NA	NA	NA	NA
P37840	Homo sapiens (Human)	Alpha-synuclein (Non-A beta component of AD amyloid) (Non-A4 component of amyloid precursor) (NACP)	SNCA NACP PARK1	0	10	0	0.795961	0.0587652	0.170093	0.893123	0.0204436	-0.0384242	24.5021	25.0344	24.7092	25.1761	25.066	24.514	23.0934	22.4252	22.3187	22.5049	23.4329	21.7842
P37840	Homo sapiens (Human)	Alpha-synuclein (Non-A beta component of AD amyloid) (Non-A4 component of amyloid precursor) (NACP)	SNCA NACP PARK1	0	23	0	0.220367	0.377086	0.144456	0.953402	0.00784794	0.0216386	23.9809	24.1604	23.7374	24.03	24.0968	24.1853	25.1383	26.0737	25.0152	25.5226	25.5328	25.2368
P37840	Homo sapiens (Human)	Alpha-synuclein (Non-A beta component of AD amyloid) (Non-A4 component of amyloid precursor) (NACP)	SNCA NACP PARK1	0	60	0	0.957246	0.0142811	0.0221611	0.22316	0.259466	-0.424704	22.8687	23.2843	22.0623	22.7011	23.0435	22.5372	22.1002	21.8706	21.9854	21.5283	22.0737	21.08
P37840	Homo sapiens (Human)	Alpha-synuclein (Non-A beta component of AD amyloid) (Non-A4 component of amyloid precursor) (NACP)	SNCA NACP PARK1	0	34	0	0.153376	0.470728	1.1793	0.875298	0.0243094	-0.17547	26.205	25.3359	25.37	27.2291	27.3166	25.903	27.078	27.6306	26.8225	27.3361	27.2277	26.4408
P46060	Homo sapiens (Human)	Ran GTPase-activating protein 1 (RanGAP1)	RANGAP1 KIAA1835 SD	0	406	0	0.229989	0.369502	0.280881	NA	NA	NA	19.0652	19.2471	19.0156	19.2727	19.4644	19.4335	NA	NA	NA	NA	NA	NA
P48426	Homo sapiens (Human)	Phosphatidylinositol 5-phosphate 4-kinase type-2 alpha (EC 2.7.1.149) (1-phosphatidylinositol 5-phosphate 4-kinase 2-alpha) (Diphosphoinositide kinase 2-alpha) (PIP5KIII) (Phosphatidylinositol 5-Phosphate 4-Kinase) (PI5P4Kalpha) (Phosphatidylinositol 5-phosphate 4-kinase type II alpha) (PI(5)P 4-kinase type II alpha) (PIP4KII-alpha) (PtdIns(4)P-5-kinase B isoform) (PtdIns(4)P-5-kinase C isoform) …	PIP4K2A PI5P4KA PIP5K2 PIP5K2A	0	228	0	0.589155	0.135866	0.277788	NA	NA	NA	22.6216	23.5946	22.3074	22.5883	23.2758	23.4928	NA	NA	NA	NA	NA	NA
P48426	Homo sapiens (Human)	Phosphatidylinositol 5-phosphate 4-kinase type-2 alpha (EC 2.7.1.149) (1-phosphatidylinositol 5-phosphate 4-kinase 2-alpha) (Diphosphoinositide kinase 2-alpha) (PIP5KIII) (Phosphatidylinositol 5-Phosphate 4-Kinase) (PI5P4Kalpha) (Phosphatidylinositol 5-phosphate 4-kinase type II alpha) (PI(5)P 4-kinase type II alpha) (PIP4KII-alpha) (PtdIns(4)P-5-kinase B isoform) (PtdIns(4)P-5-kinase C isoform) …	PIP4K2A PI5P4KA PIP5K2 PIP5K2A	0	378	0	0.0312429	0.881893	-0.272338	0.00419919	1.20819	-0.804655	23.3084	23.4565	23.197	22.9793	23.2305	22.935	20.6886	20.6559	20.6723	19.6308	19.8676	20.1044
P48426	Homo sapiens (Human)	Phosphatidylinositol 5-phosphate 4-kinase type-2 alpha (EC 2.7.1.149) (1-phosphatidylinositol 5-phosphate 4-kinase 2-alpha) (Diphosphoinositide kinase 2-alpha) (PIP5KIII) (Phosphatidylinositol 5-Phosphate 4-Kinase) (PI5P4Kalpha) (Phosphatidylinositol 5-phosphate 4-kinase type II alpha) (PI(5)P 4-kinase type II alpha) (PIP4KII-alpha) (PtdIns(4)P-5-kinase B isoform) (PtdIns(4)P-5-kinase C isoform) …	PIP4K2A PI5P4KA PIP5K2 PIP5K2A	0	234	0	0.589155	0.135866	0.277788	NA	NA	NA	22.6216	23.5946	22.3074	22.5883	23.2758	23.4928	NA	NA	NA	NA	NA	NA
P48426	Homo sapiens (Human)	Phosphatidylinositol 5-phosphate 4-kinase type-2 alpha (EC 2.7.1.149) (1-phosphatidylinositol 5-phosphate 4-kinase 2-alpha) (Diphosphoinositide kinase 2-alpha) (PIP5KIII) (Phosphatidylinositol 5-Phosphate 4-Kinase) (PI5P4Kalpha) (Phosphatidylinositol 5-phosphate 4-kinase type II alpha) (PI(5)P 4-kinase type II alpha) (PIP4KII-alpha) (PtdIns(4)P-5-kinase B isoform) (PtdIns(4)P-5-kinase C isoform) …	PIP4K2A PI5P4KA PIP5K2 PIP5K2A	0	375	0	0.167052	0.452334	-0.197541	NA	NA	NA	21.3415	21.3274	21.3494	20.863	21.2667	21.2961	NA	NA	NA	NA	NA	NA
P48426	Homo sapiens (Human)	Phosphatidylinositol 5-phosphate 4-kinase type-2 alpha (EC 2.7.1.149) (1-phosphatidylinositol 5-phosphate 4-kinase 2-alpha) (Diphosphoinositide kinase 2-alpha) (PIP5KIII) (Phosphatidylinositol 5-Phosphate 4-Kinase) (PI5P4Kalpha) (Phosphatidylinositol 5-phosphate 4-kinase type II alpha) (PI(5)P 4-kinase type II alpha) (PIP4KII-alpha) (PtdIns(4)P-5-kinase B isoform) (PtdIns(4)P-5-kinase C isoform) …	PIP4K2A PI5P4KA PIP5K2 PIP5K2A	0	15	0	NA	NA	NA	NA	NA	NA	NA	NA	NA	NA	NA	NA	NA	NA	NA	NA	NA	NA
P48426	Homo sapiens (Human)	Phosphatidylinositol 5-phosphate 4-kinase type-2 alpha (EC 2.7.1.149) (1-phosphatidylinositol 5-phosphate 4-kinase 2-alpha) (Diphosphoinositide kinase 2-alpha) (PIP5KIII) (Phosphatidylinositol 5-Phosphate 4-Kinase) (PI5P4Kalpha) (Phosphatidylinositol 5-phosphate 4-kinase type II alpha) (PI(5)P 4-kinase type II alpha) (PIP4KII-alpha) (PtdIns(4)P-5-kinase B isoform) (PtdIns(4)P-5-kinase C isoform) …	PIP4K2A PI5P4KA PIP5K2 PIP5K2A	0	27	0	0.22765	0.370315	-0.219249	NA	NA	NA	20.1411	20.5279	20.5476	19.9621	20.3435	20.2534	NA	NA	NA	NA	NA	NA
P48426	Homo sapiens (Human)	Phosphatidylinositol 5-phosphate 4-kinase type-2 alpha (EC 2.7.1.149) (1-phosphatidylinositol 5-phosphate 4-kinase 2-alpha) (Diphosphoinositide kinase 2-alpha) (PIP5KIII) (Phosphatidylinositol 5-Phosphate 4-Kinase) (PI5P4Kalpha) (Phosphatidylinositol 5-phosphate 4-kinase type II alpha) (PI(5)P 4-kinase type II alpha) (PIP4KII-alpha) (PtdIns(4)P-5-kinase B isoform) (PtdIns(4)P-5-kinase C isoform) …	PIP4K2A PI5P4KA PIP5K2 PIP5K2A	0	17	0	NA	NA	NA	NA	NA	NA	NA	NA	NA	NA	NA	NA	NA	NA	NA	NA	NA	NA
P48729	Homo sapiens (Human)	Casein kinase I isoform alpha (CKI-alpha) (EC 2.7.11.1) (CK1)	CSNK1A1	0	8	0	0.0949634	0.58544	0.391751	0.159474	0.300924	0.400152	22.3915	22.626	22.9716	22.9305	23.0984	23.1355	22.0156	22.3982	22.2611	22.2236	22.8791	22.7726
P49773	Homo sapiens (Human)	Histidine triad nucleotide-binding protein 1 (EC 3.-.-.-) (Adenosine 5'-monophosphoramidase) (Protein kinase C inhibitor 1) (Protein kinase C-interacting protein 1) (PKCI-1)	HINT1 HINT PKCI1 PRKCNH1	0	7	0	0.0188281	1.01567	-0.843036	NA	NA	NA	22.1642	22.328	22.0005	21.6669	21.3212	20.9755	NA	NA	NA	NA	NA	NA
P49959	Homo sapiens (Human)	Double-strand break repair protein MRE11 (EC 3.1.-.-) (Double-strand break repair protein MRE11A) (Meiotic recombination 11 homolog 1) (MRE11 homolog 1) (Meiotic recombination 11 homolog A) (MRE11 homolog A)	MRE11 HNGS1 MRE11A	0	442	0	NA	NA	NA	0.413742	0.143541	-0.346218	NA	NA	NA	NA	NA	NA	20.7221	21.1203	21.3208	20.0484	20.9204	21.1557
P49959	Homo sapiens (Human)	Double-strand break repair protein MRE11 (EC 3.1.-.-) (Double-strand break repair protein MRE11A) (Meiotic recombination 11 homolog 1) (MRE11 homolog 1) (Meiotic recombination 11 homolog A) (MRE11 homolog A)	MRE11 HNGS1 MRE11A	0	420	0	NA	NA	NA	NA	NA	NA	NA	NA	NA	NA	NA	NA	NA	NA	NA	NA	NA	NA
P50990	Homo sapiens (Human)	T-complex protein 1 subunit theta (TCP-1-theta) (CCT-theta) (Chaperonin containing T-complex polypeptide 1 subunit 8) (Renal carcinoma antigen NY-REN-15)	CCT8 C21orf112 CCTQ KIAA0002	0	254	0	NA	NA	NA	0.92357	0.0162478	-0.0396047	NA	NA	NA	NA	NA	NA	23.1672	23.2878	23.8394	22.782	23.4876	23.906
P50990	Homo sapiens (Human)	T-complex protein 1 subunit theta (TCP-1-theta) (CCT-theta) (Chaperonin containing T-complex polypeptide 1 subunit 8) (Renal carcinoma antigen NY-REN-15)	CCT8 C21orf112 CCTQ KIAA0002	0	260	0	0.992512	0.00248521	0.00484806	0.0990938	0.415034	-0.405827	23.6967	25.1162	24.4064	23.9105	24.5369	24.7864	25.1321	24.8867	25.1783	24.3367	24.6489	24.9939
P52597	Homo sapiens (Human)	Heterogeneous nuclear ribonucleoprotein F (hnRNP F) (Nucleolin-like protein mcs94-1) [Cleaved into: Heterogeneous nuclear ribonucleoprotein F, N-terminally processed]	HNRNPF HNRPF	0	224	0	0.896685	0.0307003	0.0391944	0.620639	0.0837595	0.108545	21.1723	21.7711	20.807	21.3476	21.2989	21.2215	21.4169	21.9034	21.5275	21.678	21.9856	21.5099
P54578	Homo sapiens (Human)	Ubiquitin carboxyl-terminal hydrolase 14 (EC 3.4.19.12) (Deubiquitinating enzyme 14) (Ubiquitin thioesterase 14) (Ubiquitin-specific-processing protease 14)	USP14 TGT	0	9	0	NA	NA	NA	0.276696	0.209201	-0.404351	NA	NA	NA	NA	NA	NA	21.744	22.4968	21.4668	21.5642	21.6148	21.3154
P55010	Homo sapiens (Human)	Eukaryotic translation initiation factor 5 (eIF-5)	EIF5	0	224	0	0.315369	0.297995	-0.415699	NA	NA	NA	22.1369	21.9628	22.0498	21.0252	22.268	21.6092	NA	NA	NA	NA	NA	NA
P61326	Homo sapiens (Human)	Protein mago nashi homolog	MAGOH MAGOHA	0	41	0	0.371495	0.245036	0.216988	NA	NA	NA	21.197	20.6578	21.1946	21.4457	21.2244	21.0303	NA	NA	NA	NA	NA	NA
P62826	Homo sapiens (Human)	GTP-binding nuclear protein Ran (Androgen receptor-associated protein 24) (GTPase Ran) (Ras-like protein TC4) (Ras-related nuclear protein)	RAN ARA24 OK/SW-cl.81	0	23	0	0.458517	0.201879	-0.396488	NA	NA	NA	21.2877	21.6522	22.6756	21.4754	21.9048	21.0459	NA	NA	NA	NA	NA	NA
P62826	Homo sapiens (Human)	GTP-binding nuclear protein Ran (Androgen receptor-associated protein 24) (GTPase Ran) (Ras-like protein TC4) (Ras-related nuclear protein)	RAN ARA24 OK/SW-cl.81	0	134	0	0.0753035	0.651862	-0.440716	NA	NA	NA	20.0558	20.346	19.9546	19.4192	19.9106	19.7045	NA	NA	NA	NA	NA	NA
P63027	Homo sapiens (Human)	Vesicle-associated membrane protein 2 (VAMP-2) (Synaptobrevin-2)	VAMP2 SYB2	0	52	0	0.768427	0.0645021	-0.112616	NA	NA	NA	20.9003	20.7074	21.4885	21.0276	20.4084	21.3224	NA	NA	NA	NA	NA	NA
P67809	Homo sapiens (Human)	Y-box-binding protein 1 (YB-1) (CCAAT-binding transcription factor I subunit A) (CBF-A) (DNA-binding protein B) (DBPB) (Enhancer factor I subunit A) (EFI-A) (Nuclease-sensitive element-binding protein 1) (Y-box transcription factor)	YBX1 NSEP1 YB1	0	64	0	0.801174	0.0572069	-0.137896	0.333669	0.175839	-0.363365	21.6348	22.7762	21.8365	21.4626	22.6781	21.6931	22.3979	23.052	22.4003	21.9367	22.7448	22.0786
P68871	Homo sapiens (Human)	Hemoglobin subunit beta (Beta-globin) (Hemoglobin beta chain) [Cleaved into: LVV-hemorphin-7; Spinorphin]	HBB	0	83	0	0.232726	0.367247	-0.1628	NA	NA	NA	23.7841	23.9624	23.8732	23.8903	23.7104	23.5306	NA	NA	NA	NA	NA	NA
P68871	Homo sapiens (Human)	Hemoglobin subunit beta (Beta-globin) (Hemoglobin beta chain) [Cleaved into: LVV-hemorphin-7; Spinorphin]	HBB	0	9	0	0.341928	0.269659	-0.303348	0.319652	0.180176	-0.337961	24.0345	24.1561	23.3631	23.5479	23.7832	23.3126	22.0661	22.4219	22.7351	21.728	21.9835	22.4979
P68871	Homo sapiens (Human)	Hemoglobin subunit beta (Beta-globin) (Hemoglobin beta chain) [Cleaved into: LVV-hemorphin-7; Spinorphin]	HBB	0	60	0	NA	NA	NA	NA	NA	NA	NA	NA	NA	NA	NA	NA	NA	NA	NA	NA	NA	NA
P68871	Homo sapiens (Human)	Hemoglobin subunit beta (Beta-globin) (Hemoglobin beta chain) [Cleaved into: LVV-hemorphin-7; Spinorphin]	HBB	0	18	0	NA	NA	NA	NA	NA	NA	NA	NA	NA	NA	NA	NA	NA	NA	NA	NA	NA	NA
P68871	Homo sapiens (Human)	Hemoglobin subunit beta (Beta-globin) (Hemoglobin beta chain) [Cleaved into: LVV-hemorphin-7; Spinorphin]	HBB	0	62	0	NA	NA	NA	NA	NA	NA	NA	NA	NA	NA	NA	NA	NA	NA	NA	NA	NA	NA
P68871	Homo sapiens (Human)	Hemoglobin subunit beta (Beta-globin) (Hemoglobin beta chain) [Cleaved into: LVV-hemorphin-7; Spinorphin]	HBB	0	145	0	0.654831	0.110258	0.0715378	0.0514609	0.579622	-0.354038	26.3675	26.1202	25.9749	26.3912	26.2211	26.065	24.8812	25.1466	24.9524	24.8286	24.481	24.6085
P69905	Homo sapiens (Human)	Hemoglobin subunit alpha (Alpha-globin) (Hemoglobin alpha chain)	HBA1; HBA2	0	17	0	0.479719	0.18938	-0.0858889	0.142554	0.314196	-0.473505	24.3659	24.6572	24.5478	24.4524	24.5517	24.3093	22.5904	23.0384	22.7935	22.0812	22.1372	22.7834
P69905	Homo sapiens (Human)	Hemoglobin subunit alpha (Alpha-globin) (Hemoglobin alpha chain)	HBA1; HBA2	0	91	0	NA	NA	NA	NA	NA	NA	NA	NA	NA	NA	NA	NA	NA	NA	NA	NA	NA	NA
P69905	Homo sapiens (Human)	Hemoglobin subunit alpha (Alpha-globin) (Hemoglobin alpha chain)	HBA1; HBA2	0	12	0	0.229658	0.369502	-0.211167	0.162939	0.300924	-0.376611	25.9665	25.7511	25.9325	25.5257	25.8376	25.6533	23.8037	24.4501	24.4279	23.9518	23.7396	23.8604
P69905	Homo sapiens (Human)	Hemoglobin subunit alpha (Alpha-globin) (Hemoglobin alpha chain)	HBA1; HBA2	0	8	0	0.483772	0.187556	-0.0847722	0.162939	0.300924	-0.376611	27.0385	26.8931	27.0806	26.8852	27.0967	26.7759	23.8037	24.4501	24.4279	23.9518	23.7396	23.8604
P69905	Homo sapiens (Human)	Hemoglobin subunit alpha (Alpha-globin) (Hemoglobin alpha chain)	HBA1; HBA2	0	140	0	NA	NA	NA	NA	NA	NA	NA	NA	NA	NA	NA	NA	NA	NA	NA	NA	NA	NA
P78318	Homo sapiens (Human)	Immunoglobulin-binding protein 1 (B-cell signal transduction molecule alpha 4) (Protein alpha-4) (CD79a-binding protein 1) (Protein phosphatase 2/4/6 regulatory subunit) (Renal carcinoma antigen NY-REN-16)	IGBP1 IBP1	0	241	0	0.856869	0.041792	-0.0491989	0.747217	0.0585465	-0.0591847	23.5928	23.5108	23.6524	23.5111	23.1118	23.9855	23.4442	23.8183	23.7849	23.534	23.8661	23.4699
P78356	Homo sapiens (Human)	Phosphatidylinositol 5-phosphate 4-kinase type-2 beta (EC 2.7.1.149) (1-phosphatidylinositol 5-phosphate 4-kinase 2-beta) (Diphosphoinositide kinase 2-beta) (Phosphatidylinositol 5-phosphate 4-kinase type II beta) (PI(5)P 4-kinase type II beta) (PIP4KII-beta) (PtdIns(5)P-4-kinase isoform 2-beta)	PIP4K2B PIP5K2B	0	385	0	0.167052	0.452334	-0.197541	NA	NA	NA	21.3415	21.3274	21.3494	20.863	21.2667	21.2961	NA	NA	NA	NA	NA	NA
P78356	Homo sapiens (Human)	Phosphatidylinositol 5-phosphate 4-kinase type-2 beta (EC 2.7.1.149) (1-phosphatidylinositol 5-phosphate 4-kinase 2-beta) (Diphosphoinositide kinase 2-beta) (Phosphatidylinositol 5-phosphate 4-kinase type II beta) (PI(5)P 4-kinase type II beta) (PIP4KII-beta) (PtdIns(5)P-4-kinase isoform 2-beta)	PIP4K2B PIP5K2B	0	388	0	0.0312429	0.881893	-0.272338	0.00419919	1.20819	-0.804655	23.3084	23.4565	23.197	22.9793	23.2305	22.935	20.6886	20.6559	20.6723	19.6308	19.8676	20.1044
P78417	Homo sapiens (Human)	Glutathione S-transferase omega-1 (GSTO-1) (EC 2.5.1.18) (Glutathione S-transferase omega 1-1) (GSTO 1-1) (Glutathione-dependent dehydroascorbate reductase) (EC 1.8.5.1) (Monomethylarsonic acid reductase) (MMA(V) reductase) (EC 1.20.4.2) (S-(Phenacyl)glutathione reductase) (SPG-R)	GSTO1 GSTTLP28	0	136	0	0.179769	0.43162	-0.54325	NA	NA	NA	20.1652	20.985	20.5751	19.6222	20.0318	20.4415	NA	NA	NA	NA	NA	NA
PF3D7_0102200	Plasmodium falciparum 3D7	ring-infected erythrocyte surface antigen	RESA	Previous IDs: MAL1P1.13;PFA0110w	312	0	0.0552893	0.741173	1.08689	0.73016	0.0610815	0.0357753	24.1722	22.9929	22.6891	24.548	24.2965	24.2703	27.4728	27.4653	27.3883	27.6503	27.3319	27.4516
PF3D7_0102200	Plasmodium falciparum 3D7	ring-infected erythrocyte surface antigen	RESA	Previous IDs: MAL1P1.13;PFA0110w	320	0	NA	NA	NA	NA	NA	NA	NA	NA	NA	NA	NA	NA	NA	NA	NA	NA	NA	NA
PF3D7_0105700	Plasmodium falciparum 3D7	asparagine-rich antigen Pfa35-2	N/A	Previous IDs: MAL1P1.47;PFA0280w	2285	0	NA	NA	NA	0.0329972	0.677603	-1.42928	NA	NA	NA	NA	NA	NA	21.2159	21.0511	21.1632	19.3735	20.5954	19.1734
PF3D7_0108300	Plasmodium falciparum 3D7	conserved Plasmodium protein, unknown function	ARP	Previous IDs: MAL1P2.10;PFA0410w	9	1	NA	NA	NA	0.130962	0.339074	-0.10863	NA	NA	NA	NA	NA	NA	23.2499	23.2647	23.2573	23.1079	23.0765	23.2615
PF3D7_0113000	Plasmodium falciparum 3D7	glutamic acid-rich protein GARP	GARP	Previous IDs: MAL1P3.06;PFA0620c	163	0	0.503927	0.17631	-0.223769	NA	NA	NA	20.699	20.6724	20.6458	20.8544	19.852	20.6394	NA	NA	NA	NA	NA	NA
PF3D7_0113000	Plasmodium falciparum 3D7	glutamic acid-rich protein GARP	GARP	Previous IDs: MAL1P3.06;PFA0620c	503	0	0.260864	0.336639	0.0556111	0.00126921	1.47452	-1.4401	25.1741	25.5136	25.3197	25.4949	25.4934	25.186	24.0039	23.4749	23.4324	22.5137	21.9978	22.0794
PF3D7_0113000	Plasmodium falciparum 3D7	glutamic acid-rich protein GARP	GARP	Previous IDs: MAL1P3.06;PFA0620c	497	0	0.00724769	1.31745	-0.0735914	NA	NA	NA	24.0284	24.0542	24.0679	24.2277	24.0165	23.6856	NA	NA	NA	NA	NA	NA
PF3D7_0113000	Plasmodium falciparum 3D7	glutamic acid-rich protein GARP	GARP	Previous IDs: MAL1P3.06;PFA0620c	484	0	NA	NA	NA	NA	NA	NA	NA	NA	NA	NA	NA	NA	NA	NA	NA	NA	NA	NA
PF3D7_0113000	Plasmodium falciparum 3D7	glutamic acid-rich protein GARP	GARP	Previous IDs: MAL1P3.06;PFA0620c	533	0	0.156887	0.463689	0.16053	0.412198	0.143541	-0.140022	23.7224	23.5715	23.8719	23.8181	23.9188	23.9104	21.6784	22.0899	22.0027	21.6315	21.8856	21.8338
PF3D7_0113000	Plasmodium falciparum 3D7	glutamic acid-rich protein GARP	GARP	Previous IDs: MAL1P3.06;PFA0620c	530	0	0.157334	0.463689	0.161527	0.273658	0.209201	-0.196619	22.0767	21.9708	22.2599	22.1457	22.2808	22.3655	20.2992	20.5256	20.7521	20.1845	20.329	20.4735
PF3D7_0113000	Plasmodium falciparum 3D7	glutamic acid-rich protein GARP	GARP	Previous IDs: MAL1P3.06;PFA0620c	541	0	0.241126	0.357377	0.248139	0.757369	0.0555379	0.172659	24.8352	24.782	24.9229	25.1696	25.2102	24.9047	20.6959	22.1703	21.4743	21.097	21.6195	22.1421
PF3D7_0113000	Plasmodium falciparum 3D7	glutamic acid-rich protein GARP	GARP	Previous IDs: MAL1P3.06;PFA0620c	444	0	NA	NA	NA	NA	NA	NA	NA	NA	NA	NA	NA	NA	NA	NA	NA	NA	NA	NA
PF3D7_0113000	Plasmodium falciparum 3D7	glutamic acid-rich protein GARP	GARP	Previous IDs: MAL1P3.06;PFA0620c	175	0	0.0851424	0.622073	-0.191546	0.0342275	0.677603	-0.610241	23.5958	23.1801	23.2823	23.6433	23.3383	22.502	22.2413	22.8769	22.6465	21.9386	21.798	22.1973
PF3D7_0113000	Plasmodium falciparum 3D7	glutamic acid-rich protein GARP	GARP	Previous IDs: MAL1P3.06;PFA0620c	499	0	0.012908	1.13151	-0.0932429	0.00770534	1.01514	-1.01357	24.9628	25.1215	25.0247	25.1224	24.9899	24.7171	25.9282	25.3927	25.4208	24.3541	24.6949	24.6519
PF3D7_0113200	Plasmodium falciparum 3D7	Plasmodium exported protein, unknown function	N/A	Previous IDs: MAL1P3.08;PFA0630c	275	0	NA	NA	NA	NA	NA	NA	NA	NA	NA	NA	NA	NA	NA	NA	NA	NA	NA	NA
PF3D7_0113200	Plasmodium falciparum 3D7	Plasmodium exported protein, unknown function	N/A	Previous IDs: MAL1P3.08;PFA0630c	290	0	0.198977	0.41017	0.69452	NA	NA	NA	22.7008	23.4109	24.121	23.7771	24.4338	24.1054	NA	NA	NA	NA	NA	NA
PF3D7_0113200	Plasmodium falciparum 3D7	Plasmodium exported protein, unknown function	N/A	Previous IDs: MAL1P3.08;PFA0630c	288	0	NA	NA	NA	0.292623	0.196736	-0.339768	NA	NA	NA	NA	NA	NA	19.1163	19.4427	18.79	18.4164	18.7766	19.1368
PF3D7_0113200	Plasmodium falciparum 3D7	Plasmodium exported protein, unknown function	N/A	Previous IDs: MAL1P3.08;PFA0630c	286	0	NA	NA	NA	0.292623	0.196736	-0.339768	NA	NA	NA	NA	NA	NA	19.1163	19.4427	18.79	18.4164	18.7766	19.1368
PF3D7_0113200	Plasmodium falciparum 3D7	Plasmodium exported protein, unknown function	N/A	Previous IDs: MAL1P3.08;PFA0630c	129	0	0.0454224	0.78727	0.574836	0.0815894	0.462568	-0.634063	23.3642	22.9535	22.7424	23.6709	23.5292	23.5845	23.9672	23.4954	23.9128	22.8092	23.4027	23.2613
PF3D7_0113300	Plasmodium falciparum 3D7	Plasmodium exported protein (hyp1), unknown function	N/A	Previous IDs: MAL1P3.09;PFA0635c	99	0	NA	NA	NA	NA	NA	NA	NA	NA	NA	NA	NA	NA	NA	NA	NA	NA	NA	NA
PF3D7_0113700	Plasmodium falciparum 3D7	heat shock protein 40, type II	HSP40	Previous IDs: MAL1P4.10;PFA0660w	203	0	NA	NA	NA	0.0101159	0.951286	-0.744086	NA	NA	NA	NA	NA	NA	24.3511	23.8129	24.1416	23.1438	23.7657	23.1638
PF3D7_0113700	Plasmodium falciparum 3D7	heat shock protein 40, type II	HSP40	Previous IDs: MAL1P4.10;PFA0660w	392	0	0.475023	0.191549	0.46048	0.911585	0.016465	-0.0342493	20.4653	21.4483	20.9568	22.2995	21.4237	20.5285	21.7742	22.3423	21.8758	22.289	21.8247	21.7759
PF3D7_0113700	Plasmodium falciparum 3D7	heat shock protein 40, type II	HSP40	Previous IDs: MAL1P4.10;PFA0660w	91	0	NA	NA	NA	NA	NA	NA	NA	NA	NA	NA	NA	NA	NA	NA	NA	NA	NA	NA
PF3D7_0113700	Plasmodium falciparum 3D7	heat shock protein 40, type II	HSP40	Previous IDs: MAL1P4.10;PFA0660w	399	0	0.475023	0.191549	0.46048	0.690049	0.0716536	0.503909	20.4653	21.4483	20.9568	22.2995	21.4237	20.5285	20.4923	22.9588	23.3254	22.7047	22.7963	22.7872
PF3D7_0113700	Plasmodium falciparum 3D7	heat shock protein 40, type II	HSP40	Previous IDs: MAL1P4.10;PFA0660w	395	0	0.475023	0.191549	0.46048	0.0781181	0.479004	-0.0711457	20.4653	21.4483	20.9568	22.2995	21.4237	20.5285	21.9181	22.2641	21.984	22.0652	21.9236	21.964
PF3D7_0113700	Plasmodium falciparum 3D7	heat shock protein 40, type II	HSP40	Previous IDs: MAL1P4.10;PFA0660w	71	0	NA	NA	NA	0.562502	0.0982876	-0.13875	NA	NA	NA	NA	NA	NA	22.6717	21.9972	22.3345	22.0183	22.1957	22.3732
PF3D7_0113700	Plasmodium falciparum 3D7	heat shock protein 40, type II	HSP40	Previous IDs: MAL1P4.10;PFA0660w	145	0	NA	NA	NA	0.0015895	1.43108	2.35607	NA	NA	NA	NA	NA	NA	19.2215	19.8242	19.3819	21.3338	22.1359	22.0261
PF3D7_0113700	Plasmodium falciparum 3D7	heat shock protein 40, type II	HSP40	Previous IDs: MAL1P4.10;PFA0660w	155	0	NA	NA	NA	NA	NA	NA	NA	NA	NA	NA	NA	NA	NA	NA	NA	NA	NA	NA
PF3D7_0113700	Plasmodium falciparum 3D7	heat shock protein 40, type II	HSP40	Previous IDs: MAL1P4.10;PFA0660w	117	0	NA	NA	NA	0.0482124	0.589843	-0.432168	NA	NA	NA	NA	NA	NA	22.1686	22.5678	22.2458	21.7374	21.8884	22.0598
PF3D7_0113700	Plasmodium falciparum 3D7	heat shock protein 40, type II	HSP40	Previous IDs: MAL1P4.10;PFA0660w	189	0	0.434864	0.215985	-0.284662	0.00211369	1.38059	-0.60743	24.5211	24.2625	23.5539	24.1049	23.5664	23.8122	24.8286	24.6126	24.8093	24.133	24.2831	24.0122
PF3D7_0113700	Plasmodium falciparum 3D7	heat shock protein 40, type II	HSP40	Previous IDs: MAL1P4.10;PFA0660w	78	0	NA	NA	NA	0.0331356	0.677603	-0.673951	NA	NA	NA	NA	NA	NA	23.6588	23.2992	23.6081	22.562	23.1767	22.8056
PF3D7_0113700	Plasmodium falciparum 3D7	heat shock protein 40, type II	HSP40	Previous IDs: MAL1P4.10;PFA0660w	185	0	NA	NA	NA	0.000801547	1.61779	-0.767947	NA	NA	NA	NA	NA	NA	24.2789	24.4164	24.4433	23.5724	23.61	23.6523
PF3D7_0114500	Plasmodium falciparum 3D7	Plasmodium exported protein (hyp10), unknown function	N/A	Previous IDs: MAL1P4.16d;PFA0700c	58	0	0.0998327	0.575277	-0.403242	NA	NA	NA	20.7778	20.6788	20.5985	19.9349	20.3612	20.5493	NA	NA	NA	NA	NA	NA
PF3D7_0114500	Plasmodium falciparum 3D7	Plasmodium exported protein (hyp10), unknown function	N/A	Previous IDs: MAL1P4.16d;PFA0700c	61	0	0.231066	0.368918	-0.052576	NA	NA	NA	20.4637	20.5669	20.417	20.2092	20.5925	20.4882	NA	NA	NA	NA	NA	NA
PF3D7_0115200	Plasmodium falciparum 3D7	rifin	RIF	Previous IDs: MAL1P4.23;PFA0740w	100	0	0.484064	0.187556	0.280304	NA	NA	NA	20.7578	20.7955	20.7201	21.6672	20.409	21.0381	NA	NA	NA	NA	NA	NA
PF3D7_0115200	Plasmodium falciparum 3D7	rifin	RIF	Previous IDs: MAL1P4.23;PFA0740w	108	0	0.484064	0.187556	0.280304	NA	NA	NA	20.7578	20.7955	20.7201	21.6672	20.409	21.0381	NA	NA	NA	NA	NA	NA
PF3D7_0200300	Plasmodium falciparum 3D7	erythrocyte membrane protein 1 (PfEMP1), exon 2	N/A	Previous IDs: PF02_0003;PFB0020c	334	0	NA	NA	NA	0.719752	0.0622699	0.114813	NA	NA	NA	NA	NA	NA	20.1403	20.7939	19.7747	20.3565	20.3457	20.3511
PF3D7_0200300	Plasmodium falciparum 3D7	erythrocyte membrane protein 1 (PfEMP1), exon 2	N/A	Previous IDs: PF02_0003;PFB0020c	328	0	0.284924	0.3176	-0.150973	0.0256237	0.756533	0.494752	20.3279	20.5377	20.4818	20.2982	20.1161	20.4802	21.7263	21.5665	22.0458	22.2464	22.3183	22.2581
PF3D7_0200300	Plasmodium falciparum 3D7	erythrocyte membrane protein 1 (PfEMP1), exon 2	N/A	Previous IDs: PF02_0003;PFB0020c	288	0	NA	NA	NA	NA	NA	NA	NA	NA	NA	NA	NA	NA	NA	NA	NA	NA	NA	NA
PF3D7_0201600	Plasmodium falciparum 3D7	PHISTb domain-containing RESA-like protein 1	RLP1	Previous IDs: PF02_0016;PFB0080c	480	0	0.0574661	0.732001	0.908231	NA	NA	NA	21.2191	20.4179	20.1177	21.6235	21.5608	21.295	NA	NA	NA	NA	NA	NA
PF3D7_0201600	Plasmodium falciparum 3D7	PHISTb domain-containing RESA-like protein 1	RLP1	Previous IDs: PF02_0016;PFB0080c	476	0	0.0574661	0.732001	0.908231	NA	NA	NA	21.2191	20.4179	20.1177	21.6235	21.5608	21.295	NA	NA	NA	NA	NA	NA
PF3D7_0201600	Plasmodium falciparum 3D7	PHISTb domain-containing RESA-like protein 1	RLP1	Previous IDs: PF02_0016;PFB0080c	479	0	0.0574661	0.732001	0.908231	NA	NA	NA	21.2191	20.4179	20.1177	21.6235	21.5608	21.295	NA	NA	NA	NA	NA	NA
PF3D7_0201600	Plasmodium falciparum 3D7	PHISTb domain-containing RESA-like protein 1	RLP1	Previous IDs: PF02_0016;PFB0080c	338	0	NA	NA	NA	NA	NA	NA	NA	NA	NA	NA	NA	NA	NA	NA	NA	NA	NA	NA
PF3D7_0201600	Plasmodium falciparum 3D7	PHISTb domain-containing RESA-like protein 1	RLP1	Previous IDs: PF02_0016;PFB0080c	459	0	0.494694	0.180961	0.141467	NA	NA	NA	20.823	21.1207	21.0758	21.1467	21.2409	21.0563	NA	NA	NA	NA	NA	NA
PF3D7_0201700	Plasmodium falciparum 3D7	DnaJ protein, putative	N/A	Previous IDs: PF02_0017;PFB0085c	317	0	NA	NA	NA	NA	NA	NA	NA	NA	NA	NA	NA	NA	NA	NA	NA	NA	NA	NA
PF3D7_0201800	Plasmodium falciparum 3D7	knob associated heat shock protein 40	KAHsp40	Previous IDs: PF02_0018;PFB0090c	184	0	0.0201443	1.00037	1.12257	0.325903	0.178994	-0.171205	21.7985	21.8647	21.8704	22.693	23.3818	22.8265	24.9297	24.6899	25.0502	24.455	25.3289	24.3723
PF3D7_0201800	Plasmodium falciparum 3D7	knob associated heat shock protein 40	KAHsp40	Previous IDs: PF02_0018;PFB0090c	187	0	0.00454351	1.46226	1.44697	0.944213	0.00905017	0.0126419	20.8674	20.3478	20.5729	21.8221	22.4447	21.8623	23.7275	23.9399	24.1804	24.1778	23.8661	23.8418
PF3D7_0201800	Plasmodium falciparum 3D7	knob associated heat shock protein 40	KAHsp40	Previous IDs: PF02_0018;PFB0090c	119	0	0.932429	0.0212014	-0.0800656	0.222802	0.259466	-0.396247	23.9779	23.7697	22.0131	23.7771	21.911	23.8325	22.0721	22.2836	22.302	22.3634	21.761	21.3445
PF3D7_0201900	Plasmodium falciparum 3D7	erythrocyte membrane protein 3	EMP3	Previous IDs: PF02_0019;PFB0095c	779	0	0.568852	0.14575	-0.102213	NA	NA	NA	20.8132	21.0499	20.5764	20.7078	20.8722	20.5528	NA	NA	NA	NA	NA	NA
PF3D7_0201900	Plasmodium falciparum 3D7	erythrocyte membrane protein 3	EMP3	Previous IDs: PF02_0019;PFB0095c	1408	0	0.0443285	0.791279	-0.569872	NA	NA	NA	21.916	21.6131	22.2798	21.4109	21.4017	21.2867	NA	NA	NA	NA	NA	NA
PF3D7_0201900	Plasmodium falciparum 3D7	erythrocyte membrane protein 3	EMP3	Previous IDs: PF02_0019;PFB0095c	1041	0	0.134663	0.510618	0.235303	NA	NA	NA	21.8367	22.2272	22.1032	22.5317	22.2751	22.0662	NA	NA	NA	NA	NA	NA
PF3D7_0201900	Plasmodium falciparum 3D7	erythrocyte membrane protein 3	EMP3	Previous IDs: PF02_0019;PFB0095c	2214	0	0.00395862	1.48765	-0.486246	NA	NA	NA	23.6142	23.4086	23.5698	22.9437	23.0712	23.119	NA	NA	NA	NA	NA	NA
PF3D7_0201900	Plasmodium falciparum 3D7	erythrocyte membrane protein 3	EMP3	Previous IDs: PF02_0019;PFB0095c	1447	0	0.314841	0.2981	-0.416407	NA	NA	NA	21.1206	21.2593	21.1326	20.9173	20.2733	21.0727	NA	NA	NA	NA	NA	NA
PF3D7_0201900	Plasmodium falciparum 3D7	erythrocyte membrane protein 3	EMP3	Previous IDs: PF02_0019;PFB0095c	1850	0	0.000623519	2.02672	-0.608697	NA	NA	NA	23.3874	23.2061	23.3779	22.5144	22.7382	22.8928	NA	NA	NA	NA	NA	NA
PF3D7_0201900	Plasmodium falciparum 3D7	erythrocyte membrane protein 3	EMP3	Previous IDs: PF02_0019;PFB0095c	1369	0	0.11233	0.549224	-0.510056	NA	NA	NA	23.582	23.5231	23.6499	22.5948	23.2024	23.4275	NA	NA	NA	NA	NA	NA
PF3D7_0201900	Plasmodium falciparum 3D7	erythrocyte membrane protein 3	EMP3	Previous IDs: PF02_0019;PFB0095c	1707	0	0.084693	0.622931	0.699541	NA	NA	NA	19.8865	20.4064	20.1465	21.3783	20.6256	20.5341	NA	NA	NA	NA	NA	NA
PF3D7_0201900	Plasmodium falciparum 3D7	erythrocyte membrane protein 3	EMP3	Previous IDs: PF02_0019;PFB0095c	2284	0	0.184856	0.425866	-0.355137	NA	NA	NA	22.8656	22.9868	22.9995	22.2406	22.6558	22.8902	NA	NA	NA	NA	NA	NA
PF3D7_0201900	Plasmodium falciparum 3D7	erythrocyte membrane protein 3	EMP3	Previous IDs: PF02_0019;PFB0095c	2408	0	0.707646	0.0879099	-0.113092	NA	NA	NA	19.9774	20.595	20.1308	19.7355	20.4603	20.1681	NA	NA	NA	NA	NA	NA
PF3D7_0201900	Plasmodium falciparum 3D7	erythrocyte membrane protein 3	EMP3	Previous IDs: PF02_0019;PFB0095c	2406	0	NA	NA	NA	NA	NA	NA	NA	NA	NA	NA	NA	NA	NA	NA	NA	NA	NA	NA
PF3D7_0201900	Plasmodium falciparum 3D7	erythrocyte membrane protein 3	EMP3	Previous IDs: PF02_0019;PFB0095c	1452	0	0.19828	0.410931	-0.275789	NA	NA	NA	22.7365	22.8908	22.862	22.3412	22.658	22.6627	NA	NA	NA	NA	NA	NA
PF3D7_0201900	Plasmodium falciparum 3D7	erythrocyte membrane protein 3	EMP3	Previous IDs: PF02_0019;PFB0095c	828	0	0.629133	0.120673	0.0476997	NA	NA	NA	21.1968	21.7025	21.5501	21.34	21.608	21.6445	NA	NA	NA	NA	NA	NA
PF3D7_0201900	Plasmodium falciparum 3D7	erythrocyte membrane protein 3	EMP3	Previous IDs: PF02_0019;PFB0095c	1089	0	0.864938	0.0417081	0.0153678	NA	NA	NA	22.0993	22.0745	21.9001	21.9468	22.1436	22.0296	NA	NA	NA	NA	NA	NA
PF3D7_0201900	Plasmodium falciparum 3D7	erythrocyte membrane protein 3	EMP3	Previous IDs: PF02_0019;PFB0095c	2045	0	0.000623519	2.02672	-0.608697	NA	NA	NA	23.3874	23.2061	23.3779	22.5144	22.7382	22.8928	NA	NA	NA	NA	NA	NA
PF3D7_0201900	Plasmodium falciparum 3D7	erythrocyte membrane protein 3	EMP3	Previous IDs: PF02_0019;PFB0095c	567	0	0.128909	0.516914	-0.708196	NA	NA	NA	22.2075	22.2666	21.4537	20.8396	21.7464	21.2172	NA	NA	NA	NA	NA	NA
PF3D7_0201900	Plasmodium falciparum 3D7	erythrocyte membrane protein 3	EMP3	Previous IDs: PF02_0019;PFB0095c	2279	0	0.274196	0.323835	-0.448882	NA	NA	NA	21.7884	21.8992	21.8466	21.2913	21.066	21.8302	NA	NA	NA	NA	NA	NA
PF3D7_0201900	Plasmodium falciparum 3D7	erythrocyte membrane protein 3	EMP3	Previous IDs: PF02_0019;PFB0095c	1043	0	0.134663	0.510618	0.235303	NA	NA	NA	21.8367	22.2272	22.1032	22.5317	22.2751	22.0662	NA	NA	NA	NA	NA	NA
PF3D7_0201900	Plasmodium falciparum 3D7	erythrocyte membrane protein 3	EMP3	Previous IDs: PF02_0019;PFB0095c	480	0	NA	NA	NA	NA	NA	NA	NA	NA	NA	NA	NA	NA	NA	NA	NA	NA	NA	NA
PF3D7_0201900	Plasmodium falciparum 3D7	erythrocyte membrane protein 3	EMP3	Previous IDs: PF02_0019;PFB0095c	821	0	0.379631	0.24346	0.016434	NA	NA	NA	21.9941	22.2687	21.9907	22.2553	22.1928	21.8548	NA	NA	NA	NA	NA	NA
PF3D7_0201900	Plasmodium falciparum 3D7	erythrocyte membrane protein 3	EMP3	Previous IDs: PF02_0019;PFB0095c	960	0	0.629133	0.120673	0.0476997	NA	NA	NA	21.1968	21.7025	21.5501	21.34	21.608	21.6445	NA	NA	NA	NA	NA	NA
PF3D7_0201900	Plasmodium falciparum 3D7	erythrocyte membrane protein 3	EMP3	Previous IDs: PF02_0019;PFB0095c	733	0	0.31024	0.302623	0.454333	NA	NA	NA	21.4656	21.763	22.0605	22.9172	21.9279	21.807	NA	NA	NA	NA	NA	NA
PF3D7_0201900	Plasmodium falciparum 3D7	erythrocyte membrane protein 3	EMP3	Previous IDs: PF02_0019;PFB0095c	1772	0	0.000623519	2.02672	-0.608697	NA	NA	NA	23.3874	23.2061	23.3779	22.5144	22.7382	22.8928	NA	NA	NA	NA	NA	NA
PF3D7_0201900	Plasmodium falciparum 3D7	erythrocyte membrane protein 3	EMP3	Previous IDs: PF02_0019;PFB0095c	1785	0	0.11233	0.549224	-0.510056	NA	NA	NA	23.582	23.5231	23.6499	22.5948	23.2024	23.4275	NA	NA	NA	NA	NA	NA
PF3D7_0201900	Plasmodium falciparum 3D7	erythrocyte membrane protein 3	EMP3	Previous IDs: PF02_0019;PFB0095c	777	0	NA	NA	NA	NA	NA	NA	NA	NA	NA	NA	NA	NA	NA	NA	NA	NA	NA	NA
PF3D7_0201900	Plasmodium falciparum 3D7	erythrocyte membrane protein 3	EMP3	Previous IDs: PF02_0019;PFB0095c	2227	0	0.11233	0.549224	-0.510056	NA	NA	NA	23.582	23.5231	23.6499	22.5948	23.2024	23.4275	NA	NA	NA	NA	NA	NA
PF3D7_0201900	Plasmodium falciparum 3D7	erythrocyte membrane protein 3	EMP3	Previous IDs: PF02_0019;PFB0095c	938	0	0.629133	0.120673	0.0476997	NA	NA	NA	21.1968	21.7025	21.5501	21.34	21.608	21.6445	NA	NA	NA	NA	NA	NA
PF3D7_0201900	Plasmodium falciparum 3D7	erythrocyte membrane protein 3	EMP3	Previous IDs: PF02_0019;PFB0095c	1634	0	0.307046	0.304611	-0.275106	NA	NA	NA	19.9992	19.7847	19.9732	19.1939	19.8864	19.8516	NA	NA	NA	NA	NA	NA
PF3D7_0201900	Plasmodium falciparum 3D7	erythrocyte membrane protein 3	EMP3	Previous IDs: PF02_0019;PFB0095c	2136	0	0.11233	0.549224	-0.510056	NA	NA	NA	23.582	23.5231	23.6499	22.5948	23.2024	23.4275	NA	NA	NA	NA	NA	NA
PF3D7_0201900	Plasmodium falciparum 3D7	erythrocyte membrane protein 3	EMP3	Previous IDs: PF02_0019;PFB0095c	894	0	0.538042	0.164519	-0.152366	NA	NA	NA	20.0807	20.0687	20.3526	19.6236	20.0954	20.3259	NA	NA	NA	NA	NA	NA
PF3D7_0201900	Plasmodium falciparum 3D7	erythrocyte membrane protein 3	EMP3	Previous IDs: PF02_0019;PFB0095c	380	0	0.421512	0.220635	-0.216899	NA	NA	NA	23.8117	23.9166	23.7068	23.151	23.9494	23.6839	NA	NA	NA	NA	NA	NA
PF3D7_0201900	Plasmodium falciparum 3D7	erythrocyte membrane protein 3	EMP3	Previous IDs: PF02_0019;PFB0095c	1158	0	0.162024	0.457689	-0.690489	NA	NA	NA	21.033	21.5885	20.9087	19.808	20.7161	20.9345	NA	NA	NA	NA	NA	NA
PF3D7_0201900	Plasmodium falciparum 3D7	erythrocyte membrane protein 3	EMP3	Previous IDs: PF02_0019;PFB0095c	427	0	0.850722	0.042497	0.0228711	NA	NA	NA	24.2272	24.0834	23.9452	23.9568	24.2273	24.1402	NA	NA	NA	NA	NA	NA
PF3D7_0201900	Plasmodium falciparum 3D7	erythrocyte membrane protein 3	EMP3	Previous IDs: PF02_0019;PFB0095c	1082	0	0.864938	0.0417081	0.0153678	NA	NA	NA	22.0993	22.0745	21.9001	21.9468	22.1436	22.0296	NA	NA	NA	NA	NA	NA
PF3D7_0201900	Plasmodium falciparum 3D7	erythrocyte membrane protein 3	EMP3	Previous IDs: PF02_0019;PFB0095c	1120	0	0.864938	0.0417081	0.0153678	NA	NA	NA	22.0993	22.0745	21.9001	21.9468	22.1436	22.0296	NA	NA	NA	NA	NA	NA
PF3D7_0201900	Plasmodium falciparum 3D7	erythrocyte membrane protein 3	EMP3	Previous IDs: PF02_0019;PFB0095c	1139	0	0.0382727	0.827329	-1.18403	NA	NA	NA	22.0232	22.2146	21.333	20.3338	20.4492	21.2357	NA	NA	NA	NA	NA	NA
PF3D7_0201900	Plasmodium falciparum 3D7	erythrocyte membrane protein 3	EMP3	Previous IDs: PF02_0019;PFB0095c	669	0	NA	NA	NA	NA	NA	NA	NA	NA	NA	NA	NA	NA	NA	NA	NA	NA	NA	NA
PF3D7_0201900	Plasmodium falciparum 3D7	erythrocyte membrane protein 3	EMP3	Previous IDs: PF02_0019;PFB0095c	1108	0	0.864938	0.0417081	0.0153678	NA	NA	NA	22.0993	22.0745	21.9001	21.9468	22.1436	22.0296	NA	NA	NA	NA	NA	NA
PF3D7_0201900	Plasmodium falciparum 3D7	erythrocyte membrane protein 3	EMP3	Previous IDs: PF02_0019;PFB0095c	2266	0	0.11233	0.549224	-0.510056	NA	NA	NA	23.582	23.5231	23.6499	22.5948	23.2024	23.4275	NA	NA	NA	NA	NA	NA
PF3D7_0201900	Plasmodium falciparum 3D7	erythrocyte membrane protein 3	EMP3	Previous IDs: PF02_0019;PFB0095c	2206	0	0.184856	0.425866	-0.355137	NA	NA	NA	22.8656	22.9868	22.9995	22.2406	22.6558	22.8902	NA	NA	NA	NA	NA	NA
PF3D7_0201900	Plasmodium falciparum 3D7	erythrocyte membrane protein 3	EMP3	Previous IDs: PF02_0019;PFB0095c	1530	0	0.045798	0.78727	-0.189296	NA	NA	NA	21.7603	21.5321	21.8778	21.4268	21.5392	21.6363	NA	NA	NA	NA	NA	NA
PF3D7_0201900	Plasmodium falciparum 3D7	erythrocyte membrane protein 3	EMP3	Previous IDs: PF02_0019;PFB0095c	889	0	0.134663	0.510618	0.235303	NA	NA	NA	21.8367	22.2272	22.1032	22.5317	22.2751	22.0662	NA	NA	NA	NA	NA	NA
PF3D7_0201900	Plasmodium falciparum 3D7	erythrocyte membrane protein 3	EMP3	Previous IDs: PF02_0019;PFB0095c	2344	0	0.000623519	2.02672	-0.608697	NA	NA	NA	23.3874	23.2061	23.3779	22.5144	22.7382	22.8928	NA	NA	NA	NA	NA	NA
PF3D7_0201900	Plasmodium falciparum 3D7	erythrocyte membrane protein 3	EMP3	Previous IDs: PF02_0019;PFB0095c	1228	0	NA	NA	NA	NA	NA	NA	NA	NA	NA	NA	NA	NA	NA	NA	NA	NA	NA	NA
PF3D7_0201900	Plasmodium falciparum 3D7	erythrocyte membrane protein 3	EMP3	Previous IDs: PF02_0019;PFB0095c	1465	0	0.425336	0.220068	-0.149952	NA	NA	NA	21.9249	22.0093	22.2647	21.636	22.0699	22.0432	NA	NA	NA	NA	NA	NA
PF3D7_0201900	Plasmodium falciparum 3D7	erythrocyte membrane protein 3	EMP3	Previous IDs: PF02_0019;PFB0095c	1021	0	0.134663	0.510618	0.235303	NA	NA	NA	21.8367	22.2272	22.1032	22.5317	22.2751	22.0662	NA	NA	NA	NA	NA	NA
PF3D7_0201900	Plasmodium falciparum 3D7	erythrocyte membrane protein 3	EMP3	Previous IDs: PF02_0019;PFB0095c	2024	0	0.0739723	0.657298	-0.405527	NA	NA	NA	22.5799	22.5706	22.6034	21.9129	22.3033	22.3212	NA	NA	NA	NA	NA	NA
PF3D7_0201900	Plasmodium falciparum 3D7	erythrocyte membrane protein 3	EMP3	Previous IDs: PF02_0019;PFB0095c	1746	0	0.314841	0.2981	-0.416407	NA	NA	NA	21.1206	21.2593	21.1326	20.9173	20.2733	21.0727	NA	NA	NA	NA	NA	NA
PF3D7_0201900	Plasmodium falciparum 3D7	erythrocyte membrane protein 3	EMP3	Previous IDs: PF02_0019;PFB0095c	1179	0	0.0389432	0.826319	-1.67757	NA	NA	NA	23.0134	22.8407	21.7573	20.8596	20.1823	21.5368	NA	NA	NA	NA	NA	NA
PF3D7_0201900	Plasmodium falciparum 3D7	erythrocyte membrane protein 3	EMP3	Previous IDs: PF02_0019;PFB0095c	2201	0	0.274196	0.323835	-0.448882	NA	NA	NA	21.7884	21.8992	21.8466	21.2913	21.066	21.8302	NA	NA	NA	NA	NA	NA
PF3D7_0201900	Plasmodium falciparum 3D7	erythrocyte membrane protein 3	EMP3	Previous IDs: PF02_0019;PFB0095c	867	0	0.606054	0.129819	0.190285	NA	NA	NA	22.1936	22.448	22.2538	22.8579	22.5461	22.0622	NA	NA	NA	NA	NA	NA
PF3D7_0201900	Plasmodium falciparum 3D7	erythrocyte membrane protein 3	EMP3	Previous IDs: PF02_0019;PFB0095c	931	0	0.379631	0.24346	0.016434	NA	NA	NA	21.9941	22.2687	21.9907	22.2553	22.1928	21.8548	NA	NA	NA	NA	NA	NA
PF3D7_0201900	Plasmodium falciparum 3D7	erythrocyte membrane protein 3	EMP3	Previous IDs: PF02_0019;PFB0095c	1198	0	0.0389432	0.826319	-1.67757	NA	NA	NA	23.0134	22.8407	21.7573	20.8596	20.1823	21.5368	NA	NA	NA	NA	NA	NA
PF3D7_0201900	Plasmodium falciparum 3D7	erythrocyte membrane protein 3	EMP3	Previous IDs: PF02_0019;PFB0095c	1538	0	NA	NA	NA	NA	NA	NA	NA	NA	NA	NA	NA	NA	NA	NA	NA	NA	NA	NA
PF3D7_0201900	Plasmodium falciparum 3D7	erythrocyte membrane protein 3	EMP3	Previous IDs: PF02_0019;PFB0095c	2123	0	0.000623519	2.02672	-0.608697	NA	NA	NA	23.3874	23.2061	23.3779	22.5144	22.7382	22.8928	NA	NA	NA	NA	NA	NA
PF3D7_0201900	Plasmodium falciparum 3D7	erythrocyte membrane protein 3	EMP3	Previous IDs: PF02_0019;PFB0095c	933	0	0.606054	0.129819	0.190285	NA	NA	NA	22.1936	22.448	22.2538	22.8579	22.5461	22.0622	NA	NA	NA	NA	NA	NA
PF3D7_0201900	Plasmodium falciparum 3D7	erythrocyte membrane protein 3	EMP3	Previous IDs: PF02_0019;PFB0095c	618	0	0.31675	0.297338	0.1761	0.107935	0.391651	-0.517049	21.1909	21.3853	21.3438	21.4763	21.5863	21.3857	21.6854	21.9622	21.2533	20.8705	21.1166	21.3627
PF3D7_0201900	Plasmodium falciparum 3D7	erythrocyte membrane protein 3	EMP3	Previous IDs: PF02_0019;PFB0095c	799	0	0.31024	0.302623	0.454333	NA	NA	NA	21.4656	21.763	22.0605	22.9172	21.9279	21.807	NA	NA	NA	NA	NA	NA
PF3D7_0201900	Plasmodium falciparum 3D7	erythrocyte membrane protein 3	EMP3	Previous IDs: PF02_0019;PFB0095c	1241	0	NA	NA	NA	NA	NA	NA	NA	NA	NA	NA	NA	NA	NA	NA	NA	NA	NA	NA
PF3D7_0201900	Plasmodium falciparum 3D7	erythrocyte membrane protein 3	EMP3	Previous IDs: PF02_0019;PFB0095c	1019	0	0.134663	0.510618	0.235303	NA	NA	NA	21.8367	22.2272	22.1032	22.5317	22.2751	22.0662	NA	NA	NA	NA	NA	NA
PF3D7_0201900	Plasmodium falciparum 3D7	erythrocyte membrane protein 3	EMP3	Previous IDs: PF02_0019;PFB0095c	1196	0	0.0382727	0.827329	-1.18403	NA	NA	NA	22.0232	22.2146	21.333	20.3338	20.4492	21.2357	NA	NA	NA	NA	NA	NA
PF3D7_0201900	Plasmodium falciparum 3D7	erythrocyte membrane protein 3	EMP3	Previous IDs: PF02_0019;PFB0095c	1486	0	0.084693	0.622931	0.699541	NA	NA	NA	19.8865	20.4064	20.1465	21.3783	20.6256	20.5341	NA	NA	NA	NA	NA	NA
PF3D7_0201900	Plasmodium falciparum 3D7	erythrocyte membrane protein 3	EMP3	Previous IDs: PF02_0019;PFB0095c	1146	0	0.0234596	0.969405	-0.716337	NA	NA	NA	22.2004	22.4559	22.003	21.1971	21.3897	21.9235	NA	NA	NA	NA	NA	NA
PF3D7_0201900	Plasmodium falciparum 3D7	erythrocyte membrane protein 3	EMP3	Previous IDs: PF02_0019;PFB0095c	2089	0	0.0782758	0.639878	-0.0580684	NA	NA	NA	22.0255	22.2283	22.1819	21.7886	22.2811	22.1918	NA	NA	NA	NA	NA	NA
PF3D7_0201900	Plasmodium falciparum 3D7	erythrocyte membrane protein 3	EMP3	Previous IDs: PF02_0019;PFB0095c	436	0	3.31973e-05	2.92259	-0.16665	NA	NA	NA	21.2053	20.8424	21.0126	21.0721	20.8003	20.6879	NA	NA	NA	NA	NA	NA
PF3D7_0201900	Plasmodium falciparum 3D7	erythrocyte membrane protein 3	EMP3	Previous IDs: PF02_0019;PFB0095c	887	0	0.134663	0.510618	0.235303	NA	NA	NA	21.8367	22.2272	22.1032	22.5317	22.2751	22.0662	NA	NA	NA	NA	NA	NA
PF3D7_0201900	Plasmodium falciparum 3D7	erythrocyte membrane protein 3	EMP3	Previous IDs: PF02_0019;PFB0095c	1434	0	0.0712203	0.669106	0.169691	NA	NA	NA	21.2369	21.5988	21.4881	21.709	21.5012	21.6227	NA	NA	NA	NA	NA	NA
PF3D7_0201900	Plasmodium falciparum 3D7	erythrocyte membrane protein 3	EMP3	Previous IDs: PF02_0019;PFB0095c	1525	0	0.0449723	0.78935	-0.812879	NA	NA	NA	21.8896	21.4387	22.318	20.9851	20.9107	21.3118	NA	NA	NA	NA	NA	NA
PF3D7_0201900	Plasmodium falciparum 3D7	erythrocyte membrane protein 3	EMP3	Previous IDs: PF02_0019;PFB0095c	1616	0	0.00395862	1.48765	-0.486246	NA	NA	NA	23.6142	23.4086	23.5698	22.9437	23.0712	23.119	NA	NA	NA	NA	NA	NA
PF3D7_0201900	Plasmodium falciparum 3D7	erythrocyte membrane protein 3	EMP3	Previous IDs: PF02_0019;PFB0095c	2071	0	0.00395862	1.48765	-0.486246	NA	NA	NA	23.6142	23.4086	23.5698	22.9437	23.0712	23.119	NA	NA	NA	NA	NA	NA
PF3D7_0201900	Plasmodium falciparum 3D7	erythrocyte membrane protein 3	EMP3	Previous IDs: PF02_0019;PFB0095c	1343	0	0.245032	0.354101	0.375561	NA	NA	NA	20.7072	20.9917	21.0423	21.4729	21.2853	21.1096	NA	NA	NA	NA	NA	NA
PF3D7_0201900	Plasmodium falciparum 3D7	erythrocyte membrane protein 3	EMP3	Previous IDs: PF02_0019;PFB0095c	1980	0	NA	NA	NA	NA	NA	NA	NA	NA	NA	NA	NA	NA	NA	NA	NA	NA	NA	NA
PF3D7_0201900	Plasmodium falciparum 3D7	erythrocyte membrane protein 3	EMP3	Previous IDs: PF02_0019;PFB0095c	1829	0	0.0735893	0.658393	-0.369425	NA	NA	NA	22.3985	22.3679	22.3797	21.8707	22.1872	21.9799	NA	NA	NA	NA	NA	NA
PF3D7_0201900	Plasmodium falciparum 3D7	erythrocyte membrane protein 3	EMP3	Previous IDs: PF02_0019;PFB0095c	823	0	0.606054	0.129819	0.190285	NA	NA	NA	22.1936	22.448	22.2538	22.8579	22.5461	22.0622	NA	NA	NA	NA	NA	NA
PF3D7_0201900	Plasmodium falciparum 3D7	erythrocyte membrane protein 3	EMP3	Previous IDs: PF02_0019;PFB0095c	1294	0	0.0190146	1.01567	-0.861032	NA	NA	NA	22.1166	22.3556	21.9347	20.9592	21.2469	21.6178	NA	NA	NA	NA	NA	NA
PF3D7_0201900	Plasmodium falciparum 3D7	erythrocyte membrane protein 3	EMP3	Previous IDs: PF02_0019;PFB0095c	442	0	NA	NA	NA	NA	NA	NA	NA	NA	NA	NA	NA	NA	NA	NA	NA	NA	NA	NA
PF3D7_0201900	Plasmodium falciparum 3D7	erythrocyte membrane protein 3	EMP3	Previous IDs: PF02_0019;PFB0095c	1063	0	NA	NA	NA	NA	NA	NA	NA	NA	NA	NA	NA	NA	NA	NA	NA	NA	NA	NA
PF3D7_0201900	Plasmodium falciparum 3D7	erythrocyte membrane protein 3	EMP3	Previous IDs: PF02_0019;PFB0095c	1681	0	0.11233	0.549224	-0.510056	NA	NA	NA	23.582	23.5231	23.6499	22.5948	23.2024	23.4275	NA	NA	NA	NA	NA	NA
PF3D7_0201900	Plasmodium falciparum 3D7	erythrocyte membrane protein 3	EMP3	Previous IDs: PF02_0019;PFB0095c	1720	0	0.00395862	1.48765	-0.486246	NA	NA	NA	23.6142	23.4086	23.5698	22.9437	23.0712	23.119	NA	NA	NA	NA	NA	NA
PF3D7_0201900	Plasmodium falciparum 3D7	erythrocyte membrane protein 3	EMP3	Previous IDs: PF02_0019;PFB0095c	2240	0	0.274196	0.323835	-0.448882	NA	NA	NA	21.7884	21.8992	21.8466	21.2913	21.066	21.8302	NA	NA	NA	NA	NA	NA
PF3D7_0201900	Plasmodium falciparum 3D7	erythrocyte membrane protein 3	EMP3	Previous IDs: PF02_0019;PFB0095c	1222	0	0.0234596	0.969405	-0.716337	NA	NA	NA	22.2004	22.4559	22.003	21.1971	21.3897	21.9235	NA	NA	NA	NA	NA	NA
PF3D7_0201900	Plasmodium falciparum 3D7	erythrocyte membrane protein 3	EMP3	Previous IDs: PF02_0019;PFB0095c	1733	0	0.0712203	0.669106	0.169691	NA	NA	NA	21.2369	21.5988	21.4881	21.709	21.5012	21.6227	NA	NA	NA	NA	NA	NA
PF3D7_0201900	Plasmodium falciparum 3D7	erythrocyte membrane protein 3	EMP3	Previous IDs: PF02_0019;PFB0095c	806	0	0.629133	0.120673	0.0476997	NA	NA	NA	21.1968	21.7025	21.5501	21.34	21.608	21.6445	NA	NA	NA	NA	NA	NA
PF3D7_0201900	Plasmodium falciparum 3D7	erythrocyte membrane protein 3	EMP3	Previous IDs: PF02_0019;PFB0095c	2253	0	0.00395862	1.48765	-0.486246	NA	NA	NA	23.6142	23.4086	23.5698	22.9437	23.0712	23.119	NA	NA	NA	NA	NA	NA
PF3D7_0201900	Plasmodium falciparum 3D7	erythrocyte membrane protein 3	EMP3	Previous IDs: PF02_0019;PFB0095c	1289	0	0.0190146	1.01567	-0.861032	NA	NA	NA	22.1166	22.3556	21.9347	20.9592	21.2469	21.6178	NA	NA	NA	NA	NA	NA
PF3D7_0201900	Plasmodium falciparum 3D7	erythrocyte membrane protein 3	EMP3	Previous IDs: PF02_0019;PFB0095c	1551	0	0.00395862	1.48765	-0.486246	NA	NA	NA	23.6142	23.4086	23.5698	22.9437	23.0712	23.119	NA	NA	NA	NA	NA	NA
PF3D7_0201900	Plasmodium falciparum 3D7	erythrocyte membrane protein 3	EMP3	Previous IDs: PF02_0019;PFB0095c	1941	0	0.11233	0.549224	-0.510056	NA	NA	NA	23.582	23.5231	23.6499	22.5948	23.2024	23.4275	NA	NA	NA	NA	NA	NA
PF3D7_0201900	Plasmodium falciparum 3D7	erythrocyte membrane protein 3	EMP3	Previous IDs: PF02_0019;PFB0095c	1473	0	0.245032	0.354101	0.375561	NA	NA	NA	20.7072	20.9917	21.0423	21.4729	21.2853	21.1096	NA	NA	NA	NA	NA	NA
PF3D7_0201900	Plasmodium falciparum 3D7	erythrocyte membrane protein 3	EMP3	Previous IDs: PF02_0019;PFB0095c	290	0	0.391135	0.23738	-0.349612	NA	NA	NA	20.8104	21.9325	21.2563	20.6822	21.0336	21.2346	NA	NA	NA	NA	NA	NA
PF3D7_0201900	Plasmodium falciparum 3D7	erythrocyte membrane protein 3	EMP3	Previous IDs: PF02_0019;PFB0095c	1395	0	0.00395862	1.48765	-0.486246	NA	NA	NA	23.6142	23.4086	23.5698	22.9437	23.0712	23.119	NA	NA	NA	NA	NA	NA
PF3D7_0201900	Plasmodium falciparum 3D7	erythrocyte membrane protein 3	EMP3	Previous IDs: PF02_0019;PFB0095c	229	0	NA	NA	NA	NA	NA	NA	NA	NA	NA	NA	NA	NA	NA	NA	NA	NA	NA	NA
PF3D7_0201900	Plasmodium falciparum 3D7	erythrocyte membrane protein 3	EMP3	Previous IDs: PF02_0019;PFB0095c	1894	0	0.184856	0.425866	-0.355137	NA	NA	NA	22.8656	22.9868	22.9995	22.2406	22.6558	22.8902	NA	NA	NA	NA	NA	NA
PF3D7_0201900	Plasmodium falciparum 3D7	erythrocyte membrane protein 3	EMP3	Previous IDs: PF02_0019;PFB0095c	1004	0	0.538042	0.164519	-0.152366	NA	NA	NA	20.0807	20.0687	20.3526	19.6236	20.0954	20.3259	NA	NA	NA	NA	NA	NA
PF3D7_0201900	Plasmodium falciparum 3D7	erythrocyte membrane protein 3	EMP3	Previous IDs: PF02_0019;PFB0095c	1595	0	0.045798	0.78727	-0.189296	NA	NA	NA	21.7603	21.5321	21.8778	21.4268	21.5392	21.6363	NA	NA	NA	NA	NA	NA
PF3D7_0201900	Plasmodium falciparum 3D7	erythrocyte membrane protein 3	EMP3	Previous IDs: PF02_0019;PFB0095c	1335	0	0.425336	0.220068	-0.149952	NA	NA	NA	21.9249	22.0093	22.2647	21.636	22.0699	22.0432	NA	NA	NA	NA	NA	NA
PF3D7_0201900	Plasmodium falciparum 3D7	erythrocyte membrane protein 3	EMP3	Previous IDs: PF02_0019;PFB0095c	1751	0	0.0735893	0.658393	-0.369425	NA	NA	NA	22.3985	22.3679	22.3797	21.8707	22.1872	21.9799	NA	NA	NA	NA	NA	NA
PF3D7_0201900	Plasmodium falciparum 3D7	erythrocyte membrane protein 3	EMP3	Previous IDs: PF02_0019;PFB0095c	1160	0	NA	NA	NA	NA	NA	NA	NA	NA	NA	NA	NA	NA	NA	NA	NA	NA	NA	NA
PF3D7_0201900	Plasmodium falciparum 3D7	erythrocyte membrane protein 3	EMP3	Previous IDs: PF02_0019;PFB0095c	1642	0	NA	NA	NA	NA	NA	NA	NA	NA	NA	NA	NA	NA	NA	NA	NA	NA	NA	NA
PF3D7_0201900	Plasmodium falciparum 3D7	erythrocyte membrane protein 3	EMP3	Previous IDs: PF02_0019;PFB0095c	466	0	0.976482	0.00760299	0.00471111	NA	NA	NA	20.9701	21.3567	21.0957	20.9497	21.2375	21.2495	NA	NA	NA	NA	NA	NA
PF3D7_0201900	Plasmodium falciparum 3D7	erythrocyte membrane protein 3	EMP3	Previous IDs: PF02_0019;PFB0095c	982	0	0.538042	0.164519	-0.152366	NA	NA	NA	20.0807	20.0687	20.3526	19.6236	20.0954	20.3259	NA	NA	NA	NA	NA	NA
PF3D7_0201900	Plasmodium falciparum 3D7	erythrocyte membrane protein 3	EMP3	Previous IDs: PF02_0019;PFB0095c	1421	0	0.00395862	1.48765	-0.486246	NA	NA	NA	23.6142	23.4086	23.5698	22.9437	23.0712	23.119	NA	NA	NA	NA	NA	NA
PF3D7_0201900	Plasmodium falciparum 3D7	erythrocyte membrane protein 3	EMP3	Previous IDs: PF02_0019;PFB0095c	570	0	0.128909	0.516914	-0.708196	NA	NA	NA	22.2075	22.2666	21.4537	20.8396	21.7464	21.2172	NA	NA	NA	NA	NA	NA
PF3D7_0201900	Plasmodium falciparum 3D7	erythrocyte membrane protein 3	EMP3	Previous IDs: PF02_0019;PFB0095c	1837	0	0.0113898	1.17912	-0.685969	NA	NA	NA	21.5721	21.0622	21.075	20.5505	20.7702	20.3308	NA	NA	NA	NA	NA	NA
PF3D7_0201900	Plasmodium falciparum 3D7	erythrocyte membrane protein 3	EMP3	Previous IDs: PF02_0019;PFB0095c	735	0	0.31024	0.302623	0.454333	NA	NA	NA	21.4656	21.763	22.0605	22.9172	21.9279	21.807	NA	NA	NA	NA	NA	NA
PF3D7_0201900	Plasmodium falciparum 3D7	erythrocyte membrane protein 3	EMP3	Previous IDs: PF02_0019;PFB0095c	2245	0	0.184856	0.425866	-0.355137	NA	NA	NA	22.8656	22.9868	22.9995	22.2406	22.6558	22.8902	NA	NA	NA	NA	NA	NA
PF3D7_0201900	Plasmodium falciparum 3D7	erythrocyte membrane protein 3	EMP3	Previous IDs: PF02_0019;PFB0095c	845	0	0.606054	0.129819	0.190285	NA	NA	NA	22.1936	22.448	22.2538	22.8579	22.5461	22.0622	NA	NA	NA	NA	NA	NA
PF3D7_0201900	Plasmodium falciparum 3D7	erythrocyte membrane protein 3	EMP3	Previous IDs: PF02_0019;PFB0095c	1101	0	0.864938	0.0417081	0.0153678	NA	NA	NA	22.0993	22.0745	21.9001	21.9468	22.1436	22.0296	NA	NA	NA	NA	NA	NA
PF3D7_0201900	Plasmodium falciparum 3D7	erythrocyte membrane protein 3	EMP3	Previous IDs: PF02_0019;PFB0095c	1026	0	0.538042	0.164519	-0.152366	NA	NA	NA	20.0807	20.0687	20.3526	19.6236	20.0954	20.3259	NA	NA	NA	NA	NA	NA
PF3D7_0201900	Plasmodium falciparum 3D7	erythrocyte membrane protein 3	EMP3	Previous IDs: PF02_0019;PFB0095c	1356	0	0.00395862	1.48765	-0.486246	NA	NA	NA	23.6142	23.4086	23.5698	22.9437	23.0712	23.119	NA	NA	NA	NA	NA	NA
PF3D7_0201900	Plasmodium falciparum 3D7	erythrocyte membrane protein 3	EMP3	Previous IDs: PF02_0019;PFB0095c	640	0	0.31675	0.297338	0.1761	0.107935	0.391651	-0.517049	21.1909	21.3853	21.3438	21.4763	21.5863	21.3857	21.6854	21.9622	21.2533	20.8705	21.1166	21.3627
PF3D7_0201900	Plasmodium falciparum 3D7	erythrocyte membrane protein 3	EMP3	Previous IDs: PF02_0019;PFB0095c	2162	0	NA	NA	NA	NA	NA	NA	NA	NA	NA	NA	NA	NA	NA	NA	NA	NA	NA	NA
PF3D7_0201900	Plasmodium falciparum 3D7	erythrocyte membrane protein 3	EMP3	Previous IDs: PF02_0019;PFB0095c	2006	0	0.000623519	2.02672	-0.608697	NA	NA	NA	23.3874	23.2061	23.3779	22.5144	22.7382	22.8928	NA	NA	NA	NA	NA	NA
PF3D7_0201900	Plasmodium falciparum 3D7	erythrocyte membrane protein 3	EMP3	Previous IDs: PF02_0019;PFB0095c	1048	0	0.538042	0.164519	-0.152366	NA	NA	NA	20.0807	20.0687	20.3526	19.6236	20.0954	20.3259	NA	NA	NA	NA	NA	NA
PF3D7_0201900	Plasmodium falciparum 3D7	erythrocyte membrane protein 3	EMP3	Previous IDs: PF02_0019;PFB0095c	2375	0	0.0356328	0.842966	-0.292252	NA	NA	NA	19.5969	19.4958	19.698	19.3047	19.4318	19.1776	NA	NA	NA	NA	NA	NA
PF3D7_0201900	Plasmodium falciparum 3D7	erythrocyte membrane protein 3	EMP3	Previous IDs: PF02_0019;PFB0095c	487	0	0.119405	0.539014	-0.275856	NA	NA	NA	23.1534	22.8239	22.8209	22.6588	22.8042	22.5077	NA	NA	NA	NA	NA	NA
PF3D7_0201900	Plasmodium falciparum 3D7	erythrocyte membrane protein 3	EMP3	Previous IDs: PF02_0019;PFB0095c	1863	0	0.11233	0.549224	-0.510056	NA	NA	NA	23.582	23.5231	23.6499	22.5948	23.2024	23.4275	NA	NA	NA	NA	NA	NA
PF3D7_0201900	Plasmodium falciparum 3D7	erythrocyte membrane protein 3	EMP3	Previous IDs: PF02_0019;PFB0095c	953	0	0.379631	0.24346	0.016434	NA	NA	NA	21.9941	22.2687	21.9907	22.2553	22.1928	21.8548	NA	NA	NA	NA	NA	NA
PF3D7_0201900	Plasmodium falciparum 3D7	erythrocyte membrane protein 3	EMP3	Previous IDs: PF02_0019;PFB0095c	1915	0	0.0238852	0.968658	-0.815241	NA	NA	NA	21.4217	20.8024	20.735	20.1711	20.2949	20.0474	NA	NA	NA	NA	NA	NA
PF3D7_0201900	Plasmodium falciparum 3D7	erythrocyte membrane protein 3	EMP3	Previous IDs: PF02_0019;PFB0095c	1314	0	0.0414988	0.811421	-0.144512	NA	NA	NA	22.1452	22.2721	22.2545	21.9214	22.1562	22.1607	NA	NA	NA	NA	NA	NA
PF3D7_0201900	Plasmodium falciparum 3D7	erythrocyte membrane protein 3	EMP3	Previous IDs: PF02_0019;PFB0095c	2019	0	0.274196	0.323835	-0.448882	NA	NA	NA	21.7884	21.8992	21.8466	21.2913	21.066	21.8302	NA	NA	NA	NA	NA	NA
PF3D7_0201900	Plasmodium falciparum 3D7	erythrocyte membrane protein 3	EMP3	Previous IDs: PF02_0019;PFB0095c	1954	0	0.0712203	0.669106	0.169691	NA	NA	NA	21.2369	21.5988	21.4881	21.709	21.5012	21.6227	NA	NA	NA	NA	NA	NA
PF3D7_0201900	Plasmodium falciparum 3D7	erythrocyte membrane protein 3	EMP3	Previous IDs: PF02_0019;PFB0095c	1798	0	0.00395862	1.48765	-0.486246	NA	NA	NA	23.6142	23.4086	23.5698	22.9437	23.0712	23.119	NA	NA	NA	NA	NA	NA
PF3D7_0201900	Plasmodium falciparum 3D7	erythrocyte membrane protein 3	EMP3	Previous IDs: PF02_0019;PFB0095c	1564	0	0.11233	0.549224	-0.510056	NA	NA	NA	23.582	23.5231	23.6499	22.5948	23.2024	23.4275	NA	NA	NA	NA	NA	NA
PF3D7_0201900	Plasmodium falciparum 3D7	erythrocyte membrane protein 3	EMP3	Previous IDs: PF02_0019;PFB0095c	1876	0	0.00395862	1.48765	-0.486246	NA	NA	NA	23.6142	23.4086	23.5698	22.9437	23.0712	23.119	NA	NA	NA	NA	NA	NA
PF3D7_0201900	Plasmodium falciparum 3D7	erythrocyte membrane protein 3	EMP3	Previous IDs: PF02_0019;PFB0095c	2149	0	0.00395862	1.48765	-0.486246	NA	NA	NA	23.6142	23.4086	23.5698	22.9437	23.0712	23.119	NA	NA	NA	NA	NA	NA
PF3D7_0201900	Plasmodium falciparum 3D7	erythrocyte membrane protein 3	EMP3	Previous IDs: PF02_0019;PFB0095c	865	0	0.379631	0.24346	0.016434	NA	NA	NA	21.9941	22.2687	21.9907	22.2553	22.1928	21.8548	NA	NA	NA	NA	NA	NA
PF3D7_0201900	Plasmodium falciparum 3D7	erythrocyte membrane protein 3	EMP3	Previous IDs: PF02_0019;PFB0095c	1141	0	0.0389432	0.826319	-1.67757	NA	NA	NA	23.0134	22.8407	21.7573	20.8596	20.1823	21.5368	NA	NA	NA	NA	NA	NA
PF3D7_0201900	Plasmodium falciparum 3D7	erythrocyte membrane protein 3	EMP3	Previous IDs: PF02_0019;PFB0095c	1190	0	NA	NA	NA	NA	NA	NA	NA	NA	NA	NA	NA	NA	NA	NA	NA	NA	NA	NA
PF3D7_0201900	Plasmodium falciparum 3D7	erythrocyte membrane protein 3	EMP3	Previous IDs: PF02_0019;PFB0095c	1889	0	0.274196	0.323835	-0.448882	NA	NA	NA	21.7884	21.8992	21.8466	21.2913	21.066	21.8302	NA	NA	NA	NA	NA	NA
PF3D7_0201900	Plasmodium falciparum 3D7	erythrocyte membrane protein 3	EMP3	Previous IDs: PF02_0019;PFB0095c	1070	0	0.864938	0.0417081	0.0153678	NA	NA	NA	22.0993	22.0745	21.9001	21.9468	22.1436	22.0296	NA	NA	NA	NA	NA	NA
PF3D7_0201900	Plasmodium falciparum 3D7	erythrocyte membrane protein 3	EMP3	Previous IDs: PF02_0019;PFB0095c	850	0	0.629133	0.120673	0.0476997	NA	NA	NA	21.1968	21.7025	21.5501	21.34	21.608	21.6445	NA	NA	NA	NA	NA	NA
PF3D7_0201900	Plasmodium falciparum 3D7	erythrocyte membrane protein 3	EMP3	Previous IDs: PF02_0019;PFB0095c	909	0	0.134663	0.510618	0.235303	NA	NA	NA	21.8367	22.2272	22.1032	22.5317	22.2751	22.0662	NA	NA	NA	NA	NA	NA
PF3D7_0201900	Plasmodium falciparum 3D7	erythrocyte membrane protein 3	EMP3	Previous IDs: PF02_0019;PFB0095c	1811	0	0.0712203	0.669106	0.169691	NA	NA	NA	21.2369	21.5988	21.4881	21.709	21.5012	21.6227	NA	NA	NA	NA	NA	NA
PF3D7_0201900	Plasmodium falciparum 3D7	erythrocyte membrane protein 3	EMP3	Previous IDs: PF02_0019;PFB0095c	1590	0	0.0449723	0.78935	-0.812879	NA	NA	NA	21.8896	21.4387	22.318	20.9851	20.9107	21.3118	NA	NA	NA	NA	NA	NA
PF3D7_0201900	Plasmodium falciparum 3D7	erythrocyte membrane protein 3	EMP3	Previous IDs: PF02_0019;PFB0095c	977	0	0.606054	0.129819	0.190285	NA	NA	NA	22.1936	22.448	22.2538	22.8579	22.5461	22.0622	NA	NA	NA	NA	NA	NA
PF3D7_0201900	Plasmodium falciparum 3D7	erythrocyte membrane protein 3	EMP3	Previous IDs: PF02_0019;PFB0095c	1499	0	NA	NA	NA	NA	NA	NA	NA	NA	NA	NA	NA	NA	NA	NA	NA	NA	NA	NA
PF3D7_0201900	Plasmodium falciparum 3D7	erythrocyte membrane protein 3	EMP3	Previous IDs: PF02_0019;PFB0095c	1668	0	0.00395862	1.48765	-0.486246	NA	NA	NA	23.6142	23.4086	23.5698	22.9437	23.0712	23.119	NA	NA	NA	NA	NA	NA
PF3D7_0201900	Plasmodium falciparum 3D7	erythrocyte membrane protein 3	EMP3	Previous IDs: PF02_0019;PFB0095c	997	0	0.134663	0.510618	0.235303	NA	NA	NA	21.8367	22.2272	22.1032	22.5317	22.2751	22.0662	NA	NA	NA	NA	NA	NA
PF3D7_0201900	Plasmodium falciparum 3D7	erythrocyte membrane protein 3	EMP3	Previous IDs: PF02_0019;PFB0095c	579	0	NA	NA	NA	NA	NA	NA	NA	NA	NA	NA	NA	NA	NA	NA	NA	NA	NA	NA
PF3D7_0201900	Plasmodium falciparum 3D7	erythrocyte membrane protein 3	EMP3	Previous IDs: PF02_0019;PFB0095c	2318	0	0.000623519	2.02672	-0.608697	NA	NA	NA	23.3874	23.2061	23.3779	22.5144	22.7382	22.8928	NA	NA	NA	NA	NA	NA
PF3D7_0201900	Plasmodium falciparum 3D7	erythrocyte membrane protein 3	EMP3	Previous IDs: PF02_0019;PFB0095c	1512	0	NA	NA	NA	NA	NA	NA	NA	NA	NA	NA	NA	NA	NA	NA	NA	NA	NA	NA
PF3D7_0201900	Plasmodium falciparum 3D7	erythrocyte membrane protein 3	EMP3	Previous IDs: PF02_0019;PFB0095c	1759	0	0.0113898	1.17912	-0.685969	NA	NA	NA	21.5721	21.0622	21.075	20.5505	20.7702	20.3308	NA	NA	NA	NA	NA	NA
PF3D7_0201900	Plasmodium falciparum 3D7	erythrocyte membrane protein 3	EMP3	Previous IDs: PF02_0019;PFB0095c	2188	0	0.000623519	2.02672	-0.608697	NA	NA	NA	23.3874	23.2061	23.3779	22.5144	22.7382	22.8928	NA	NA	NA	NA	NA	NA
PF3D7_0201900	Plasmodium falciparum 3D7	erythrocyte membrane protein 3	EMP3	Previous IDs: PF02_0019;PFB0095c	1382	0	0.0712203	0.669106	0.169691	NA	NA	NA	21.2369	21.5988	21.4881	21.709	21.5012	21.6227	NA	NA	NA	NA	NA	NA
PF3D7_0201900	Plasmodium falciparum 3D7	erythrocyte membrane protein 3	EMP3	Previous IDs: PF02_0019;PFB0095c	955	0	0.606054	0.129819	0.190285	NA	NA	NA	22.1936	22.448	22.2538	22.8579	22.5461	22.0622	NA	NA	NA	NA	NA	NA
PF3D7_0201900	Plasmodium falciparum 3D7	erythrocyte membrane protein 3	EMP3	Previous IDs: PF02_0019;PFB0095c	1215	0	0.0382727	0.827329	-1.18403	NA	NA	NA	22.0232	22.2146	21.333	20.3338	20.4492	21.2357	NA	NA	NA	NA	NA	NA
PF3D7_0201900	Plasmodium falciparum 3D7	erythrocyte membrane protein 3	EMP3	Previous IDs: PF02_0019;PFB0095c	1165	0	NA	NA	NA	NA	NA	NA	NA	NA	NA	NA	NA	NA	NA	NA	NA	NA	NA	NA
PF3D7_0201900	Plasmodium falciparum 3D7	erythrocyte membrane protein 3	EMP3	Previous IDs: PF02_0019;PFB0095c	2331	0	0.0238852	0.968658	-0.815241	NA	NA	NA	21.4217	20.8024	20.735	20.1711	20.2949	20.0474	NA	NA	NA	NA	NA	NA
PF3D7_0201900	Plasmodium falciparum 3D7	erythrocyte membrane protein 3	EMP3	Previous IDs: PF02_0019;PFB0095c	284	0	0.0192515	1.01226	-0.0244602	NA	NA	NA	21.6574	21.6463	21.7909	21.5682	21.7052	21.7478	NA	NA	NA	NA	NA	NA
PF3D7_0201900	Plasmodium falciparum 3D7	erythrocyte membrane protein 3	EMP3	Previous IDs: PF02_0019;PFB0095c	999	0	0.134663	0.510618	0.235303	NA	NA	NA	21.8367	22.2272	22.1032	22.5317	22.2751	22.0662	NA	NA	NA	NA	NA	NA
PF3D7_0201900	Plasmodium falciparum 3D7	erythrocyte membrane protein 3	EMP3	Previous IDs: PF02_0019;PFB0095c	562	0	NA	NA	NA	NA	NA	NA	NA	NA	NA	NA	NA	NA	NA	NA	NA	NA	NA	NA
PF3D7_0201900	Plasmodium falciparum 3D7	erythrocyte membrane protein 3	EMP3	Previous IDs: PF02_0019;PFB0095c	1171	0	NA	NA	NA	NA	NA	NA	NA	NA	NA	NA	NA	NA	NA	NA	NA	NA	NA	NA
PF3D7_0201900	Plasmodium falciparum 3D7	erythrocyte membrane protein 3	EMP3	Previous IDs: PF02_0019;PFB0095c	2084	0	0.274196	0.323835	-0.448882	NA	NA	NA	21.7884	21.8992	21.8466	21.2913	21.066	21.8302	NA	NA	NA	NA	NA	NA
PF3D7_0201900	Plasmodium falciparum 3D7	erythrocyte membrane protein 3	EMP3	Previous IDs: PF02_0019;PFB0095c	1629	0	NA	NA	NA	NA	NA	NA	NA	NA	NA	NA	NA	NA	NA	NA	NA	NA	NA	NA
PF3D7_0201900	Plasmodium falciparum 3D7	erythrocyte membrane protein 3	EMP3	Previous IDs: PF02_0019;PFB0095c	801	0	0.31024	0.302623	0.454333	NA	NA	NA	21.4656	21.763	22.0605	22.9172	21.9279	21.807	NA	NA	NA	NA	NA	NA
PF3D7_0201900	Plasmodium falciparum 3D7	erythrocyte membrane protein 3	EMP3	Previous IDs: PF02_0019;PFB0095c	1234	0	0.162024	0.457689	-0.690489	NA	NA	NA	21.033	21.5885	20.9087	19.808	20.7161	20.9345	NA	NA	NA	NA	NA	NA
PF3D7_0201900	Plasmodium falciparum 3D7	erythrocyte membrane protein 3	EMP3	Previous IDs: PF02_0019;PFB0095c	1209	0	NA	NA	NA	NA	NA	NA	NA	NA	NA	NA	NA	NA	NA	NA	NA	NA	NA	NA
PF3D7_0201900	Plasmodium falciparum 3D7	erythrocyte membrane protein 3	EMP3	Previous IDs: PF02_0019;PFB0095c	1603	0	NA	NA	NA	NA	NA	NA	NA	NA	NA	NA	NA	NA	NA	NA	NA	NA	NA	NA
PF3D7_0201900	Plasmodium falciparum 3D7	erythrocyte membrane protein 3	EMP3	Previous IDs: PF02_0019;PFB0095c	2097	0	0.0361301	0.838512	0.766339	NA	NA	NA	19.6958	20.1796	19.9377	20.9055	20.8912	20.3154	NA	NA	NA	NA	NA	NA
PF3D7_0201900	Plasmodium falciparum 3D7	erythrocyte membrane protein 3	EMP3	Previous IDs: PF02_0019;PFB0095c	658	0	0.102252	0.569169	-0.235197	NA	NA	NA	22.584	22.6826	22.4854	22.3488	22.5145	22.1831	NA	NA	NA	NA	NA	NA
PF3D7_0201900	Plasmodium falciparum 3D7	erythrocyte membrane protein 3	EMP3	Previous IDs: PF02_0019;PFB0095c	1236	0	NA	NA	NA	NA	NA	NA	NA	NA	NA	NA	NA	NA	NA	NA	NA	NA	NA	NA
PF3D7_0201900	Plasmodium falciparum 3D7	erythrocyte membrane protein 3	EMP3	Previous IDs: PF02_0019;PFB0095c	1133	0	NA	NA	NA	NA	NA	NA	NA	NA	NA	NA	NA	NA	NA	NA	NA	NA	NA	NA
PF3D7_0201900	Plasmodium falciparum 3D7	erythrocyte membrane protein 3	EMP3	Previous IDs: PF02_0019;PFB0095c	1184	0	0.0234596	0.969405	-0.716337	NA	NA	NA	22.2004	22.4559	22.003	21.1971	21.3897	21.9235	NA	NA	NA	NA	NA	NA
PF3D7_0201900	Plasmodium falciparum 3D7	erythrocyte membrane protein 3	EMP3	Previous IDs: PF02_0019;PFB0095c	1824	0	0.314841	0.2981	-0.416407	NA	NA	NA	21.1206	21.2593	21.1326	20.9173	20.2733	21.0727	NA	NA	NA	NA	NA	NA
PF3D7_0201900	Plasmodium falciparum 3D7	erythrocyte membrane protein 3	EMP3	Previous IDs: PF02_0019;PFB0095c	872	0	0.538042	0.164519	-0.152366	NA	NA	NA	20.0807	20.0687	20.3526	19.6236	20.0954	20.3259	NA	NA	NA	NA	NA	NA
PF3D7_0201900	Plasmodium falciparum 3D7	erythrocyte membrane protein 3	EMP3	Previous IDs: PF02_0019;PFB0095c	711	0	NA	NA	NA	NA	NA	NA	NA	NA	NA	NA	NA	NA	NA	NA	NA	NA	NA	NA
PF3D7_0201900	Plasmodium falciparum 3D7	erythrocyte membrane protein 3	EMP3	Previous IDs: PF02_0019;PFB0095c	1967	0	0.00395862	1.48765	-0.486246	NA	NA	NA	23.6142	23.4086	23.5698	22.9437	23.0712	23.119	NA	NA	NA	NA	NA	NA
PF3D7_0201900	Plasmodium falciparum 3D7	erythrocyte membrane protein 3	EMP3	Previous IDs: PF02_0019;PFB0095c	1577	0	0.0712203	0.669106	0.169691	NA	NA	NA	21.2369	21.5988	21.4881	21.709	21.5012	21.6227	NA	NA	NA	NA	NA	NA
PF3D7_0201900	Plasmodium falciparum 3D7	erythrocyte membrane protein 3	EMP3	Previous IDs: PF02_0019;PFB0095c	713	0	0.568852	0.14575	-0.102213	NA	NA	NA	20.8132	21.0499	20.5764	20.7078	20.8722	20.5528	NA	NA	NA	NA	NA	NA
PF3D7_0201900	Plasmodium falciparum 3D7	erythrocyte membrane protein 3	EMP3	Previous IDs: PF02_0019;PFB0095c	2403	0	0.319185	0.294631	-0.984112	NA	NA	NA	21.0214	21.2425	21.2507	18.472	21.2038	20.8864	NA	NA	NA	NA	NA	NA
PF3D7_0201900	Plasmodium falciparum 3D7	erythrocyte membrane protein 3	EMP3	Previous IDs: PF02_0019;PFB0095c	1177	0	0.0382727	0.827329	-1.18403	NA	NA	NA	22.0232	22.2146	21.333	20.3338	20.4492	21.2357	NA	NA	NA	NA	NA	NA
PF3D7_0201900	Plasmodium falciparum 3D7	erythrocyte membrane protein 3	EMP3	Previous IDs: PF02_0019;PFB0095c	2110	0	0.0238852	0.968658	-0.815241	NA	NA	NA	21.4217	20.8024	20.735	20.1711	20.2949	20.0474	NA	NA	NA	NA	NA	NA
PF3D7_0201900	Plasmodium falciparum 3D7	erythrocyte membrane protein 3	EMP3	Previous IDs: PF02_0019;PFB0095c	1655	0	NA	NA	NA	NA	NA	NA	NA	NA	NA	NA	NA	NA	NA	NA	NA	NA	NA	NA
PF3D7_0201900	Plasmodium falciparum 3D7	erythrocyte membrane protein 3	EMP3	Previous IDs: PF02_0019;PFB0095c	975	0	0.379631	0.24346	0.016434	NA	NA	NA	21.9941	22.2687	21.9907	22.2553	22.1928	21.8548	NA	NA	NA	NA	NA	NA
PF3D7_0201900	Plasmodium falciparum 3D7	erythrocyte membrane protein 3	EMP3	Previous IDs: PF02_0019;PFB0095c	1152	0	NA	NA	NA	NA	NA	NA	NA	NA	NA	NA	NA	NA	NA	NA	NA	NA	NA	NA
PF3D7_0201900	Plasmodium falciparum 3D7	erythrocyte membrane protein 3	EMP3	Previous IDs: PF02_0019;PFB0095c	911	0	0.134663	0.510618	0.235303	NA	NA	NA	21.8367	22.2272	22.1032	22.5317	22.2751	22.0662	NA	NA	NA	NA	NA	NA
PF3D7_0201900	Plasmodium falciparum 3D7	erythrocyte membrane protein 3	EMP3	Previous IDs: PF02_0019;PFB0095c	1279	0	0.160443	0.458822	-0.0996366	NA	NA	NA	21.9178	22.236	21.9236	21.8808	21.9707	21.9271	NA	NA	NA	NA	NA	NA
PF3D7_0201900	Plasmodium falciparum 3D7	erythrocyte membrane protein 3	EMP3	Previous IDs: PF02_0019;PFB0095c	356	0	0.624881	0.120798	-0.103279	NA	NA	NA	22.1322	22.7048	21.5596	21.7047	22.1149	22.2672	NA	NA	NA	NA	NA	NA
PF3D7_0201900	Plasmodium falciparum 3D7	erythrocyte membrane protein 3	EMP3	Previous IDs: PF02_0019;PFB0095c	485	0	0.236746	0.361957	-0.123202	NA	NA	NA	21.3815	21.2288	21.5347	21.2723	21.2486	21.2545	NA	NA	NA	NA	NA	NA
PF3D7_0201900	Plasmodium falciparum 3D7	erythrocyte membrane protein 3	EMP3	Previous IDs: PF02_0019;PFB0095c	1203	0	0.0234596	0.969405	-0.716337	NA	NA	NA	22.2004	22.4559	22.003	21.1971	21.3897	21.9235	NA	NA	NA	NA	NA	NA
PF3D7_0201900	Plasmodium falciparum 3D7	erythrocyte membrane protein 3	EMP3	Previous IDs: PF02_0019;PFB0095c	2058	0	0.11233	0.549224	-0.510056	NA	NA	NA	23.582	23.5231	23.6499	22.5948	23.2024	23.4275	NA	NA	NA	NA	NA	NA
PF3D7_0201900	Plasmodium falciparum 3D7	erythrocyte membrane protein 3	EMP3	Previous IDs: PF02_0019;PFB0095c	916	0	0.629133	0.120673	0.0476997	NA	NA	NA	21.1968	21.7025	21.5501	21.34	21.608	21.6445	NA	NA	NA	NA	NA	NA
PF3D7_0201900	Plasmodium falciparum 3D7	erythrocyte membrane protein 3	EMP3	Previous IDs: PF02_0019;PFB0095c	2032	0	0.0113898	1.17912	-0.685969	NA	NA	NA	21.5721	21.0622	21.075	20.5505	20.7702	20.3308	NA	NA	NA	NA	NA	NA
PF3D7_0201900	Plasmodium falciparum 3D7	erythrocyte membrane protein 3	EMP3	Previous IDs: PF02_0019;PFB0095c	434	0	0.392528	0.236779	0.288548	NA	NA	NA	21.9694	21.2316	21.578	22.2826	21.8057	21.5564	NA	NA	NA	NA	NA	NA
PF3D7_0201900	Plasmodium falciparum 3D7	erythrocyte membrane protein 3	EMP3	Previous IDs: PF02_0019;PFB0095c	1127	0	0.0234596	0.969405	-0.716337	NA	NA	NA	22.2004	22.4559	22.003	21.1971	21.3897	21.9235	NA	NA	NA	NA	NA	NA
PF3D7_0201900	Plasmodium falciparum 3D7	erythrocyte membrane protein 3	EMP3	Previous IDs: PF02_0019;PFB0095c	1317	0	0.0414988	0.811421	-0.144512	NA	NA	NA	22.1452	22.2721	22.2545	21.9214	22.1562	22.1607	NA	NA	NA	NA	NA	NA
PF3D7_0201900	Plasmodium falciparum 3D7	erythrocyte membrane protein 3	EMP3	Previous IDs: PF02_0019;PFB0095c	1217	0	0.0389432	0.826319	-1.67757	NA	NA	NA	23.0134	22.8407	21.7573	20.8596	20.1823	21.5368	NA	NA	NA	NA	NA	NA
PF3D7_0201900	Plasmodium falciparum 3D7	erythrocyte membrane protein 3	EMP3	Previous IDs: PF02_0019;PFB0095c	843	0	0.379631	0.24346	0.016434	NA	NA	NA	21.9941	22.2687	21.9907	22.2553	22.1928	21.8548	NA	NA	NA	NA	NA	NA
PF3D7_0201900	Plasmodium falciparum 3D7	erythrocyte membrane protein 3	EMP3	Previous IDs: PF02_0019;PFB0095c	1928	0	0.000623519	2.02672	-0.608697	NA	NA	NA	23.3874	23.2061	23.3779	22.5144	22.7382	22.8928	NA	NA	NA	NA	NA	NA
PF3D7_0201900	Plasmodium falciparum 3D7	erythrocyte membrane protein 3	EMP3	Previous IDs: PF02_0019;PFB0095c	1309	0	0.0101752	1.20724	-0.602849	NA	NA	NA	22.6844	22.837	22.4675	21.944	22.2039	22.0324	NA	NA	NA	NA	NA	NA
PF3D7_0202000	Plasmodium falciparum 3D7	knob-associated histidine-rich protein	KAHRP	Previous IDs: PF02_0020;PFB0100c	561	0	0.0837768	0.624708	-0.134076	NA	NA	NA	21.8396	21.7122	21.7825	21.315	21.3283	22.2888	NA	NA	NA	NA	NA	NA
PF3D7_0202000	Plasmodium falciparum 3D7	knob-associated histidine-rich protein	KAHRP	Previous IDs: PF02_0020;PFB0100c	565	0	0.0254568	0.953071	-0.0698379	NA	NA	NA	22.1538	22.0545	22.3907	21.8918	21.7774	22.7203	NA	NA	NA	NA	NA	NA
PF3D7_0202000	Plasmodium falciparum 3D7	knob-associated histidine-rich protein	KAHRP	Previous IDs: PF02_0020;PFB0100c	157	0	0.00187343	1.65742	0.276741	0.445871	0.132123	-0.145563	24.6565	24.6921	24.7141	24.9835	25.0264	24.8831	24.3601	24.5329	24.2946	24.302	24.0841	24.3648
PF3D7_0202000	Plasmodium falciparum 3D7	knob-associated histidine-rich protein	KAHRP	Previous IDs: PF02_0020;PFB0100c	565	1	0.0670192	0.68002	-0.597759	NA	NA	NA	24.1266	23.7697	23.8485	22.9697	23.2758	23.7061	NA	NA	NA	NA	NA	NA
PF3D7_0202000	Plasmodium falciparum 3D7	knob-associated histidine-rich protein	KAHRP	Previous IDs: PF02_0020;PFB0100c	364	0	0.000162709	2.38438	1.0819	0.0373687	0.651645	1.22769	25.8084	25.6836	25.1229	26.7253	26.7683	26.367	22.1199	22.6582	22.0155	23.5563	22.8616	24.0589
PF3D7_0202000	Plasmodium falciparum 3D7	knob-associated histidine-rich protein	KAHRP	Previous IDs: PF02_0020;PFB0100c	595	0	0.0369806	0.833069	-0.652014	NA	NA	NA	23.1874	23.2282	23.8463	22.499	22.7166	23.0903	NA	NA	NA	NA	NA	NA
PF3D7_0202000	Plasmodium falciparum 3D7	knob-associated histidine-rich protein	KAHRP	Previous IDs: PF02_0020;PFB0100c	408	0	0.444056	0.211772	0.232174	NA	NA	NA	21.917	21.2961	21.9512	21.8565	21.7163	22.288	NA	NA	NA	NA	NA	NA
PF3D7_0202000	Plasmodium falciparum 3D7	knob-associated histidine-rich protein	KAHRP	Previous IDs: PF02_0020;PFB0100c	179	0	0.000391751	2.1152	0.559884	0.198595	0.266724	0.602872	22.9861	22.9468	22.9074	23.5067	23.5858	23.4275	24.866	23.8804	23.6695	24.6161	25.0054	24.6029
PF3D7_0202000	Plasmodium falciparum 3D7	knob-associated histidine-rich protein	KAHRP	Previous IDs: PF02_0020;PFB0100c	595	1	0.447785	0.208678	-0.477296	NA	NA	NA	20.7758	21.437	22.4919	21.0909	20.6245	21.5574	NA	NA	NA	NA	NA	NA
PF3D7_0202000	Plasmodium falciparum 3D7	knob-associated histidine-rich protein	KAHRP	Previous IDs: PF02_0020;PFB0100c	478	0	NA	NA	NA	NA	NA	NA	NA	NA	NA	NA	NA	NA	NA	NA	NA	NA	NA	NA
PF3D7_0202000	Plasmodium falciparum 3D7	knob-associated histidine-rich protein	KAHRP	Previous IDs: PF02_0020;PFB0100c	645	0	0.733986	0.0786189	-0.0620022	NA	NA	NA	21.3669	21.4996	21.7925	21.3245	21.4377	21.7107	NA	NA	NA	NA	NA	NA
PF3D7_0202000	Plasmodium falciparum 3D7	knob-associated histidine-rich protein	KAHRP	Previous IDs: PF02_0020;PFB0100c	432	0	0.398083	0.232591	0.235801	NA	NA	NA	21.0278	20.9677	21.2235	21.2006	21.1175	21.6083	NA	NA	NA	NA	NA	NA
PF3D7_0202000	Plasmodium falciparum 3D7	knob-associated histidine-rich protein	KAHRP	Previous IDs: PF02_0020;PFB0100c	561	1	0.0530691	0.752993	-0.602272	NA	NA	NA	22.77	22.8441	23.1206	22.0486	22.2059	22.6735	NA	NA	NA	NA	NA	NA
PF3D7_0202000	Plasmodium falciparum 3D7	knob-associated histidine-rich protein	KAHRP	Previous IDs: PF02_0020;PFB0100c	461	0	0.514355	0.171003	-0.256854	NA	NA	NA	19.5944	18.9296	19.262	18.8745	18.5564	19.5846	NA	NA	NA	NA	NA	NA
PF3D7_0202000	Plasmodium falciparum 3D7	knob-associated histidine-rich protein	KAHRP	Previous IDs: PF02_0020;PFB0100c	545	0	0.00229749	1.60392	-0.0635337	0.0776649	0.47907	0.260246	23.2587	22.9672	23.3547	23.0886	23.1077	23.1936	21.2689	21.2431	21.0048	21.2583	21.4733	21.566
PF3D7_0202000	Plasmodium falciparum 3D7	knob-associated histidine-rich protein	KAHRP	Previous IDs: PF02_0020;PFB0100c	364	1	1.96557e-10	7.437	-3.15383	0.00515145	1.14425	-3.32329	24.0334	23.8676	23.8521	21.1367	20.4805	20.6743	22.7971	22.878	22.0886	19.6044	19.9891	18.2004
PF3D7_0202000	Plasmodium falciparum 3D7	knob-associated histidine-rich protein	KAHRP	Previous IDs: PF02_0020;PFB0100c	166	0	0.1027	0.569169	-0.000346667	0.25374	0.223183	0.0581487	24.3356	24.3372	24.1121	24.3049	24.0422	24.4367	24.3426	24.5911	23.9905	24.6025	24.106	24.3901
PF3D7_0202000	Plasmodium falciparum 3D7	knob-associated histidine-rich protein	KAHRP	Previous IDs: PF02_0020;PFB0100c	585	0	0.125291	0.523733	-0.244845	NA	NA	NA	21.2524	20.9844	21.6313	20.9187	20.8747	21.3402	NA	NA	NA	NA	NA	NA
PF3D7_0202000	Plasmodium falciparum 3D7	knob-associated histidine-rich protein	KAHRP	Previous IDs: PF02_0020;PFB0100c	512	0	0.0225598	0.975577	-0.356809	0.199997	0.26569	0.444295	23.0568	22.7762	23.0705	22.4567	22.4924	22.884	21.9778	22.3295	21.906	22.0028	22.8304	22.713
PF3D7_0202000	Plasmodium falciparum 3D7	knob-associated histidine-rich protein	KAHRP	Previous IDs: PF02_0020;PFB0100c	435	0	0.444056	0.211772	0.232174	NA	NA	NA	21.917	21.2961	21.9512	21.8565	21.7163	22.288	NA	NA	NA	NA	NA	NA
PF3D7_0202000	Plasmodium falciparum 3D7	knob-associated histidine-rich protein	KAHRP	Previous IDs: PF02_0020;PFB0100c	575	1	0.0437884	0.79385	-0.537523	NA	NA	NA	21.663	22.1748	22.3977	21.1333	21.659	21.8307	NA	NA	NA	NA	NA	NA
PF3D7_0202000	Plasmodium falciparum 3D7	knob-associated histidine-rich protein	KAHRP	Previous IDs: PF02_0020;PFB0100c	491	0	0.304658	0.307372	-0.200849	0.979396	0.00594325	-0.00380958	22.3841	22.1595	22.3897	21.9878	21.9244	22.4186	20.2426	19.9743	20.1085	20.3038	20.1046	19.9055
PF3D7_0202000	Plasmodium falciparum 3D7	knob-associated histidine-rich protein	KAHRP	Previous IDs: PF02_0020;PFB0100c	617	0	0.93411	0.020955	0.0403278	NA	NA	NA	24.9917	24.7432	25.5509	24.9928	25.2748	25.1392	NA	NA	NA	NA	NA	NA
PF3D7_0202000	Plasmodium falciparum 3D7	knob-associated histidine-rich protein	KAHRP	Previous IDs: PF02_0020;PFB0100c	351	0	7.442e-06	3.49562	0.837464	0.000293834	1.93443	2.26775	26.0459	25.8185	25.551	26.7779	26.7014	26.4485	22.198	22.807	22.557	25.0536	24.2357	25.076
PF3D7_0202000	Plasmodium falciparum 3D7	knob-associated histidine-rich protein	KAHRP	Previous IDs: PF02_0020;PFB0100c	351	1	4.22995e-14	10.627	-3.45132	0.000171916	2.06456	-2.92763	23.5557	23.4098	23.4378	20.346	19.5796	20.1238	22.146	22.021	21.5793	18.7985	19.5674	18.5975
PF3D7_0202000	Plasmodium falciparum 3D7	knob-associated histidine-rich protein	KAHRP	Previous IDs: PF02_0020;PFB0100c	617	1	0.0963202	0.583395	0.208681	NA	NA	NA	22.4487	23.1668	23.4393	23.139	23.2133	23.3286	NA	NA	NA	NA	NA	NA
PF3D7_0202000	Plasmodium falciparum 3D7	knob-associated histidine-rich protein	KAHRP	Previous IDs: PF02_0020;PFB0100c	225	0	NA	NA	NA	NA	NA	NA	NA	NA	NA	NA	NA	NA	NA	NA	NA	NA	NA	NA
PF3D7_0202000	Plasmodium falciparum 3D7	knob-associated histidine-rich protein	KAHRP	Previous IDs: PF02_0020;PFB0100c	483	0	0.499359	0.179729	-0.291276	NA	NA	NA	21.3671	20.7501	21.4898	20.5303	20.6581	21.5448	NA	NA	NA	NA	NA	NA
PF3D7_0202000	Plasmodium falciparum 3D7	knob-associated histidine-rich protein	KAHRP	Previous IDs: PF02_0020;PFB0100c	459	0	0.514355	0.171003	-0.256854	NA	NA	NA	19.5944	18.9296	19.262	18.8745	18.5564	19.5846	NA	NA	NA	NA	NA	NA
PF3D7_0202000	Plasmodium falciparum 3D7	knob-associated histidine-rich protein	KAHRP	Previous IDs: PF02_0020;PFB0100c	434	0	0.444056	0.211772	0.232174	NA	NA	NA	21.917	21.2961	21.9512	21.8565	21.7163	22.288	NA	NA	NA	NA	NA	NA
PF3D7_0202000	Plasmodium falciparum 3D7	knob-associated histidine-rich protein	KAHRP	Previous IDs: PF02_0020;PFB0100c	500	0	0.132474	0.510618	-0.0877627	0.298368	0.194337	0.337512	23.6905	23.7344	23.8905	23.6103	23.6449	23.797	21.0653	20.8924	20.9789	21.1494	21.327	21.4727
PF3D7_0202000	Plasmodium falciparum 3D7	knob-associated histidine-rich protein	KAHRP	Previous IDs: PF02_0020;PFB0100c	354	1	4.22995e-14	10.627	-3.45132	0.000171916	2.06456	-2.92763	23.5557	23.4098	23.4378	20.346	19.5796	20.1238	22.146	22.021	21.5793	18.7985	19.5674	18.5975
PF3D7_0202000	Plasmodium falciparum 3D7	knob-associated histidine-rich protein	KAHRP	Previous IDs: PF02_0020;PFB0100c	152	0	0.0427934	0.799526	-0.0126634	0.636013	0.081011	0.186049	23.6596	23.6495	23.6809	23.6829	23.6606	23.6085	24.5934	24.2604	24.5301	24.8872	24.5569	24.498
PF3D7_0202000	Plasmodium falciparum 3D7	knob-associated histidine-rich protein	KAHRP	Previous IDs: PF02_0020;PFB0100c	463	0	0.514355	0.171003	-0.256854	NA	NA	NA	19.5944	18.9296	19.262	18.8745	18.5564	19.5846	NA	NA	NA	NA	NA	NA
PF3D7_0202000	Plasmodium falciparum 3D7	knob-associated histidine-rich protein	KAHRP	Previous IDs: PF02_0020;PFB0100c	551	0	0.0790174	0.638944	-0.0556369	NA	NA	NA	22.5267	22.1892	22.7729	22.2304	22.423	22.6684	NA	NA	NA	NA	NA	NA
PF3D7_0202000	Plasmodium falciparum 3D7	knob-associated histidine-rich protein	KAHRP	Previous IDs: PF02_0020;PFB0100c	407	0	0.444056	0.211772	0.232174	NA	NA	NA	21.917	21.2961	21.9512	21.8565	21.7163	22.288	NA	NA	NA	NA	NA	NA
PF3D7_0202000	Plasmodium falciparum 3D7	knob-associated histidine-rich protein	KAHRP	Previous IDs: PF02_0020;PFB0100c	468	0	NA	NA	NA	NA	NA	NA	NA	NA	NA	NA	NA	NA	NA	NA	NA	NA	NA	NA
PF3D7_0202000	Plasmodium falciparum 3D7	knob-associated histidine-rich protein	KAHRP	Previous IDs: PF02_0020;PFB0100c	585	1	0.0348447	0.849532	-0.519094	NA	NA	NA	21.396	21.9188	22.1587	20.9479	21.402	21.5663	NA	NA	NA	NA	NA	NA
PF3D7_0202000	Plasmodium falciparum 3D7	knob-associated histidine-rich protein	KAHRP	Previous IDs: PF02_0020;PFB0100c	531	0	0.0028529	1.53448	-0.142739	0.357096	0.165221	0.238771	24.5478	24.372	24.6047	24.4328	24.3272	24.3363	21.6008	21.8208	21.0388	21.7032	21.5842	21.8893
PF3D7_0202000	Plasmodium falciparum 3D7	knob-associated histidine-rich protein	KAHRP	Previous IDs: PF02_0020;PFB0100c	517	0	0.234884	0.364671	-0.186007	0.493027	0.1097	0.360763	24.1081	24.0695	24.2871	23.9594	23.8766	24.0707	20.4326	21.3444	19.992	20.7298	21.0588	21.0626
PF3D7_0202000	Plasmodium falciparum 3D7	knob-associated histidine-rich protein	KAHRP	Previous IDs: PF02_0020;PFB0100c	359	1	1.96557e-10	7.437	-3.15383	0.00515145	1.14425	-3.32329	24.0334	23.8676	23.8521	21.1367	20.4805	20.6743	22.7971	22.878	22.0886	19.6044	19.9891	18.2004
PF3D7_0202000	Plasmodium falciparum 3D7	knob-associated histidine-rich protein	KAHRP	Previous IDs: PF02_0020;PFB0100c	354	0	1.17541e-05	3.31351	-0.0629367	7.47681e-05	2.21377	1.91525	24.7469	24.856	24.5071	24.7149	24.4767	24.7295	20.9306	21.9868	21.5203	23.7232	23.1789	23.2813
PF3D7_0202000	Plasmodium falciparum 3D7	knob-associated histidine-rich protein	KAHRP	Previous IDs: PF02_0020;PFB0100c	541	1	0.146359	0.486754	-0.408232	NA	NA	NA	21.767	22.3663	22.3235	21.7693	21.526	21.9368	NA	NA	NA	NA	NA	NA
PF3D7_0202000	Plasmodium falciparum 3D7	knob-associated histidine-rich protein	KAHRP	Previous IDs: PF02_0020;PFB0100c	571	0	0.173234	0.441551	-0.249251	NA	NA	NA	21.8065	21.4538	22.0182	21.3392	21.3111	21.8805	NA	NA	NA	NA	NA	NA
PF3D7_0202000	Plasmodium falciparum 3D7	knob-associated histidine-rich protein	KAHRP	Previous IDs: PF02_0020;PFB0100c	555	1	0.0195109	1.00841	-0.927506	NA	NA	NA	22.8306	22.9104	23.1603	22.2153	21.1619	22.7416	NA	NA	NA	NA	NA	NA
PF3D7_0202000	Plasmodium falciparum 3D7	knob-associated histidine-rich protein	KAHRP	Previous IDs: PF02_0020;PFB0100c	575	0	0.179166	0.43169	-0.232046	NA	NA	NA	21.6204	21.2884	21.9413	21.2001	21.2508	21.7031	NA	NA	NA	NA	NA	NA
PF3D7_0202000	Plasmodium falciparum 3D7	knob-associated histidine-rich protein	KAHRP	Previous IDs: PF02_0020;PFB0100c	490	0	0.499348	0.179729	-0.107594	NA	NA	NA	22.6202	22.3293	22.5815	22.3332	22.2577	22.6174	NA	NA	NA	NA	NA	NA
PF3D7_0202000	Plasmodium falciparum 3D7	knob-associated histidine-rich protein	KAHRP	Previous IDs: PF02_0020;PFB0100c	164	0	0.0221891	0.980944	0.153318	0.508383	0.109089	-0.221633	23.5814	23.577	23.4259	23.7468	23.5756	23.7218	23.6486	23.934	23.6468	23.7074	23.2545	23.6025
PF3D7_0202000	Plasmodium falciparum 3D7	knob-associated histidine-rich protein	KAHRP	Previous IDs: PF02_0020;PFB0100c	581	0	0.158347	0.463689	-0.217638	NA	NA	NA	20.9408	20.6572	21.3237	20.6518	20.5862	21.0308	NA	NA	NA	NA	NA	NA
PF3D7_0202000	Plasmodium falciparum 3D7	knob-associated histidine-rich protein	KAHRP	Previous IDs: PF02_0020;PFB0100c	473	0	0.0270334	0.935408	-2.0155	NA	NA	NA	20.4544	19.4146	19.9337	16.9163	18.5755	18.2645	NA	NA	NA	NA	NA	NA
PF3D7_0202000	Plasmodium falciparum 3D7	knob-associated histidine-rich protein	KAHRP	Previous IDs: PF02_0020;PFB0100c	623	1	0.0963202	0.583395	0.208681	NA	NA	NA	22.4487	23.1668	23.4393	23.139	23.2133	23.3286	NA	NA	NA	NA	NA	NA
PF3D7_0202000	Plasmodium falciparum 3D7	knob-associated histidine-rich protein	KAHRP	Previous IDs: PF02_0020;PFB0100c	571	1	0.0613984	0.708247	-0.459349	NA	NA	NA	22.2278	22.5058	22.6221	21.7783	21.8365	22.363	NA	NA	NA	NA	NA	NA
PF3D7_0202000	Plasmodium falciparum 3D7	knob-associated histidine-rich protein	KAHRP	Previous IDs: PF02_0020;PFB0100c	161	0	0.012353	1.14612	0.20318	0.262866	0.215932	-0.376513	23.9476	23.8635	23.853	24.0681	24.1605	24.045	22.9569	23.8095	22.9143	22.8356	22.7565	22.9589
PF3D7_0202000	Plasmodium falciparum 3D7	knob-associated histidine-rich protein	KAHRP	Previous IDs: PF02_0020;PFB0100c	555	0	0.0188675	1.01567	-0.095598	NA	NA	NA	22.4047	22.3172	22.5179	22.032	22.0845	22.8366	NA	NA	NA	NA	NA	NA
PF3D7_0202000	Plasmodium falciparum 3D7	knob-associated histidine-rich protein	KAHRP	Previous IDs: PF02_0020;PFB0100c	545	1	0.183221	0.425866	-1.15443	NA	NA	NA	22.0519	22.3396	22.544	21.9183	19.4412	22.1127	NA	NA	NA	NA	NA	NA
PF3D7_0202000	Plasmodium falciparum 3D7	knob-associated histidine-rich protein	KAHRP	Previous IDs: PF02_0020;PFB0100c	405	0	0.398083	0.232591	0.235801	NA	NA	NA	21.0278	20.9677	21.2235	21.2006	21.1175	21.6083	NA	NA	NA	NA	NA	NA
PF3D7_0202000	Plasmodium falciparum 3D7	knob-associated histidine-rich protein	KAHRP	Previous IDs: PF02_0020;PFB0100c	551	1	0.0637842	0.694166	-1.25274	NA	NA	NA	22.8912	22.9767	23.2001	22.3821	20.1179	22.8098	NA	NA	NA	NA	NA	NA
PF3D7_0202000	Plasmodium falciparum 3D7	knob-associated histidine-rich protein	KAHRP	Previous IDs: PF02_0020;PFB0100c	581	1	0.0348447	0.849532	-0.519094	NA	NA	NA	21.396	21.9188	22.1587	20.9479	21.402	21.5663	NA	NA	NA	NA	NA	NA
PF3D7_0202000	Plasmodium falciparum 3D7	knob-associated histidine-rich protein	KAHRP	Previous IDs: PF02_0020;PFB0100c	541	0	0.00250984	1.57388	-0.0980685	0.0776649	0.47907	0.260246	23.4368	23.2072	23.4773	23.2919	23.2712	23.2639	21.2689	21.2431	21.0048	21.2583	21.4733	21.566
PF3D7_0202000	Plasmodium falciparum 3D7	knob-associated histidine-rich protein	KAHRP	Previous IDs: PF02_0020;PFB0100c	396	0	0.368943	0.245869	0.356773	NA	NA	NA	19.4068	19.1939	19.9139	19.7381	19.5878	20.259	NA	NA	NA	NA	NA	NA
PF3D7_0202000	Plasmodium falciparum 3D7	knob-associated histidine-rich protein	KAHRP	Previous IDs: PF02_0020;PFB0100c	520	0	0.0095954	1.22795	-0.282467	0.338675	0.171491	0.262247	24.1243	23.9832	24.2047	23.7274	23.7332	24.0043	20.7328	21.1252	20.2811	20.8676	20.9239	21.1344
PF3D7_0202000	Plasmodium falciparum 3D7	knob-associated histidine-rich protein	KAHRP	Previous IDs: PF02_0020;PFB0100c	423	0	0.368943	0.245869	0.356773	NA	NA	NA	19.4068	19.1939	19.9139	19.7381	19.5878	20.259	NA	NA	NA	NA	NA	NA
PF3D7_0202000	Plasmodium falciparum 3D7	knob-associated histidine-rich protein	KAHRP	Previous IDs: PF02_0020;PFB0100c	359	0	0.000354411	2.15102	-0.101303	0.00380164	1.20819	1.40278	23.9275	24.5637	23.8959	24.3387	23.3864	24.3581	20.3933	20.9715	20.0322	21.9096	21.5228	22.173
PF3D7_0202000	Plasmodium falciparum 3D7	knob-associated histidine-rich protein	KAHRP	Previous IDs: PF02_0020;PFB0100c	211	0	0.00350515	1.48765	-1.08356	0.880744	0.0232436	-0.0401797	22.7698	23.0237	22.7161	21.5247	21.8214	21.9128	26.477	25.9371	25.8485	26.2877	26.0051	25.8493
PF3D7_0202000	Plasmodium falciparum 3D7	knob-associated histidine-rich protein	KAHRP	Previous IDs: PF02_0020;PFB0100c	623	0	0.0220888	0.980944	-0.168362	NA	NA	NA	24.4058	24.2414	24.8081	24.2086	24.3958	24.3459	NA	NA	NA	NA	NA	NA
PF3D7_0202000	Plasmodium falciparum 3D7	knob-associated histidine-rich protein	KAHRP	Previous IDs: PF02_0020;PFB0100c	510	0	0.0509912	0.759388	-0.298304	NA	NA	NA	22.5793	22.3448	22.629	22.0915	22.1415	22.4252	NA	NA	NA	NA	NA	NA
PF3D7_0202100	Plasmodium falciparum 3D7	liver stage associated protein 2	LSAP2	Previous IDs: PF02_0021;PFB0105c	98	0	0.103936	0.567014	-0.0790922	0.446625	0.132123	0.106975	24.4276	24.3478	24.4095	24.2865	24.3738	24.2873	23.0515	23.1179	23.1719	23.4647	23.0934	23.1041
PF3D7_0202400	Plasmodium falciparum 3D7	translation-enhancing factor	PTEF	Previous IDs: PF02_0024;PFB0115w	977	0	NA	NA	NA	NA	NA	NA	NA	NA	NA	NA	NA	NA	NA	NA	NA	NA	NA	NA
PF3D7_0202400	Plasmodium falciparum 3D7	translation-enhancing factor	PTEF	Previous IDs: PF02_0024;PFB0115w	321	0	NA	NA	NA	NA	NA	NA	NA	NA	NA	NA	NA	NA	NA	NA	NA	NA	NA	NA
PF3D7_0202400	Plasmodium falciparum 3D7	translation-enhancing factor	PTEF	Previous IDs: PF02_0024;PFB0115w	312	0	NA	NA	NA	NA	NA	NA	NA	NA	NA	NA	NA	NA	NA	NA	NA	NA	NA	NA
PF3D7_0202400	Plasmodium falciparum 3D7	translation-enhancing factor	PTEF	Previous IDs: PF02_0024;PFB0115w	843	0	NA	NA	NA	NA	NA	NA	NA	NA	NA	NA	NA	NA	NA	NA	NA	NA	NA	NA
PF3D7_0202400	Plasmodium falciparum 3D7	translation-enhancing factor	PTEF	Previous IDs: PF02_0024;PFB0115w	329	0	0.859639	0.0417081	-0.0774456	NA	NA	NA	23.1706	22.0677	22.0495	22.6576	22.3534	22.0445	NA	NA	NA	NA	NA	NA
PF3D7_0202400	Plasmodium falciparum 3D7	translation-enhancing factor	PTEF	Previous IDs: PF02_0024;PFB0115w	92	0	NA	NA	NA	0.146395	0.31044	1.64292	NA	NA	NA	NA	NA	NA	17.6381	20.6921	19.3548	20.7401	21.3179	20.5558
PF3D7_0202400	Plasmodium falciparum 3D7	translation-enhancing factor	PTEF	Previous IDs: PF02_0024;PFB0115w	96	0	NA	NA	NA	0.146395	0.31044	1.64292	NA	NA	NA	NA	NA	NA	17.6381	20.6921	19.3548	20.7401	21.3179	20.5558
PF3D7_0202400	Plasmodium falciparum 3D7	translation-enhancing factor	PTEF	Previous IDs: PF02_0024;PFB0115w	360	0	0.0156431	1.07188	-0.504692	0.0398448	0.630621	-0.486031	23.7066	23.8303	23.4118	23.1736	23.1383	23.1228	22.7713	22.9829	22.8859	22.2411	22.6938	22.2472
PF3D7_0202400	Plasmodium falciparum 3D7	translation-enhancing factor	PTEF	Previous IDs: PF02_0024;PFB0115w	842	0	NA	NA	NA	NA	NA	NA	NA	NA	NA	NA	NA	NA	NA	NA	NA	NA	NA	NA
PF3D7_0203100	Plasmodium falciparum 3D7	protein kinase, putative	N/A	Previous IDs: PF02_0030;PFB0150c	1078	0	NA	NA	NA	0.00735236	1.0235	-0.573422	NA	NA	NA	NA	NA	NA	21.9999	22.3206	22.1603	21.5868	21.7023	21.4714
PF3D7_0203100	Plasmodium falciparum 3D7	protein kinase, putative	N/A	Previous IDs: PF02_0030;PFB0150c	1082	0	NA	NA	NA	0.00735236	1.0235	-0.573422	NA	NA	NA	NA	NA	NA	21.9999	22.3206	22.1603	21.5868	21.7023	21.4714
PF3D7_0207600	Plasmodium falciparum 3D7	serine repeat antigen 5	SERA5	Previous IDs: PF02_0072;PFB0340c	855	0	NA	NA	NA	NA	NA	NA	NA	NA	NA	NA	NA	NA	NA	NA	NA	NA	NA	NA
PF3D7_0209000	Plasmodium falciparum 3D7	6-cysteine protein P230	P230	Previous IDs: PF02_0086;PFB0405w	2409	0	NA	NA	NA	NA	NA	NA	NA	NA	NA	NA	NA	NA	NA	NA	NA	NA	NA	NA
PF3D7_0209000	Plasmodium falciparum 3D7	6-cysteine protein P230	P230	Previous IDs: PF02_0086;PFB0405w	2408	0	NA	NA	NA	NA	NA	NA	NA	NA	NA	NA	NA	NA	NA	NA	NA	NA	NA	NA
PF3D7_0219700	Plasmodium falciparum 3D7	Plasmodium exported protein (PHISTc), unknown function	GEXP20	Previous IDs: PF02_0184;PFB0900c	293	0	NA	NA	NA	NA	NA	NA	NA	NA	NA	NA	NA	NA	NA	NA	NA	NA	NA	NA
PF3D7_0220100	Plasmodium falciparum 3D7	DnaJ protein, putative	N/A	Previous IDs: PF02_0188;PFB0920w	590	0	NA	NA	NA	NA	NA	NA	NA	NA	NA	NA	NA	NA	NA	NA	NA	NA	NA	NA
PF3D7_0220100	Plasmodium falciparum 3D7	DnaJ protein, putative	N/A	Previous IDs: PF02_0188;PFB0920w	107	0	NA	NA	NA	NA	NA	NA	NA	NA	NA	NA	NA	NA	NA	NA	NA	NA	NA	NA
PF3D7_0220100	Plasmodium falciparum 3D7	DnaJ protein, putative	N/A	Previous IDs: PF02_0188;PFB0920w	452	0	0.591961	0.134286	0.0529581	NA	NA	NA	18.7886	18.9732	18.8809	18.7871	19.0212	18.9933	NA	NA	NA	NA	NA	NA
PF3D7_0220100	Plasmodium falciparum 3D7	DnaJ protein, putative	N/A	Previous IDs: PF02_0188;PFB0920w	406	0	NA	NA	NA	NA	NA	NA	NA	NA	NA	NA	NA	NA	NA	NA	NA	NA	NA	NA
PF3D7_0220100	Plasmodium falciparum 3D7	DnaJ protein, putative	N/A	Previous IDs: PF02_0188;PFB0920w	331	0	NA	NA	NA	NA	NA	NA	NA	NA	NA	NA	NA	NA	NA	NA	NA	NA	NA	NA
PF3D7_0220100	Plasmodium falciparum 3D7	DnaJ protein, putative	N/A	Previous IDs: PF02_0188;PFB0920w	605	0	NA	NA	NA	NA	NA	NA	NA	NA	NA	NA	NA	NA	NA	NA	NA	NA	NA	NA
PF3D7_0220100	Plasmodium falciparum 3D7	DnaJ protein, putative	N/A	Previous IDs: PF02_0188;PFB0920w	396	0	0.580445	0.13894	-0.126062	NA	NA	NA	21.2084	21.0114	21.5868	21.3874	20.9789	21.062	NA	NA	NA	NA	NA	NA
PF3D7_0220100	Plasmodium falciparum 3D7	DnaJ protein, putative	N/A	Previous IDs: PF02_0188;PFB0920w	102	0	NA	NA	NA	NA	NA	NA	NA	NA	NA	NA	NA	NA	NA	NA	NA	NA	NA	NA
PF3D7_0220100	Plasmodium falciparum 3D7	DnaJ protein, putative	N/A	Previous IDs: PF02_0188;PFB0920w	109	0	0.385739	0.240524	-0.0697022	0.0745321	0.486967	-0.665625	24.4634	24.4218	24.5478	24.4888	24.2877	24.4474	23.3092	24.011	24.1972	23.073	23.1582	23.2893
PF3D7_0220800	Plasmodium falciparum 3D7	cytoadherence linked asexual protein 2	CLAG2	Previous IDs: PF02_0195;PFB0935w	1397	0	0.0334583	0.863995	-0.567136	NA	NA	NA	22.3761	22.3112	22.603	21.6292	21.8042	22.1554	NA	NA	NA	NA	NA	NA
PF3D7_0221200	Plasmodium falciparum 3D7	Plasmodium exported protein (hyp15), unknown function	N/A	Previous IDs: PF02_0198;PFB0953w	125	0	0.36932	0.245869	0.809588	NA	NA	NA	20.4662	22.6622	22.9472	23.1623	22.6389	22.7031	NA	NA	NA	NA	NA	NA
PF3D7_0301600	Plasmodium falciparum 3D7	Plasmodium exported protein (hyp1), unknown function	GEXP21	Previous IDs: MAL3P8.14;PFC0080c	398	0	NA	NA	NA	NA	NA	NA	NA	NA	NA	NA	NA	NA	NA	NA	NA	NA	NA	NA
PF3D7_0301600	Plasmodium falciparum 3D7	Plasmodium exported protein (hyp1), unknown function	GEXP21	Previous IDs: MAL3P8.14;PFC0080c	264	0	NA	NA	NA	0.0207354	0.793874	0.449152	NA	NA	NA	NA	NA	NA	21.9486	21.5739	21.8115	22.0174	22.2714	22.3927
PF3D7_0301600	Plasmodium falciparum 3D7	Plasmodium exported protein (hyp1), unknown function	GEXP21	Previous IDs: MAL3P8.14;PFC0080c	257	0	NA	NA	NA	0.301732	0.193288	0.429672	NA	NA	NA	NA	NA	NA	21.4663	21.3401	21.6858	21.9839	22.5	21.2973
PF3D7_0301600	Plasmodium falciparum 3D7	Plasmodium exported protein (hyp1), unknown function	GEXP21	Previous IDs: MAL3P8.14;PFC0080c	313	0	NA	NA	NA	NA	NA	NA	NA	NA	NA	NA	NA	NA	NA	NA	NA	NA	NA	NA
PF3D7_0301600	Plasmodium falciparum 3D7	Plasmodium exported protein (hyp1), unknown function	GEXP21	Previous IDs: MAL3P8.14;PFC0080c	271	0	NA	NA	NA	0.0012932	1.47452	0.327005	NA	NA	NA	NA	NA	NA	23.2331	23.2587	23.3294	23.6421	23.7188	23.4413
PF3D7_0301600	Plasmodium falciparum 3D7	Plasmodium exported protein (hyp1), unknown function	GEXP21	Previous IDs: MAL3P8.14;PFC0080c	153	0	NA	NA	NA	0.655418	0.0803184	0.0611974	NA	NA	NA	NA	NA	NA	23.0075	22.9098	23.1604	23.5135	22.8069	22.9409
PF3D7_0301600	Plasmodium falciparum 3D7	Plasmodium exported protein (hyp1), unknown function	GEXP21	Previous IDs: MAL3P8.14;PFC0080c	192	0	NA	NA	NA	0.0247893	0.756533	0.587529	NA	NA	NA	NA	NA	NA	24.7825	24.2287	24.0976	25.0242	24.8184	25.0288
PF3D7_0301600	Plasmodium falciparum 3D7	Plasmodium exported protein (hyp1), unknown function	GEXP21	Previous IDs: MAL3P8.14;PFC0080c	219	0	NA	NA	NA	0.075595	0.485838	0.385304	NA	NA	NA	NA	NA	NA	22.8511	22.8567	23.0113	23.5563	23.2917	23.027
PF3D7_0301600	Plasmodium falciparum 3D7	Plasmodium exported protein (hyp1), unknown function	GEXP21	Previous IDs: MAL3P8.14;PFC0080c	407	0	NA	NA	NA	0.192521	0.275466	0.200589	NA	NA	NA	NA	NA	NA	22.2791	22.1335	22.2864	22.5922	22.2028	22.5057
PF3D7_0301600	Plasmodium falciparum 3D7	Plasmodium exported protein (hyp1), unknown function	GEXP21	Previous IDs: MAL3P8.14;PFC0080c	127	0	0.860319	0.0417081	-0.0313986	0.0989604	0.415034	0.167463	21.4989	20.9704	21.2346	21.2505	21.2916	21.0676	24.6403	25.0197	25.0188	25.0434	24.9832	25.1546
PF3D7_0301600	Plasmodium falciparum 3D7	Plasmodium exported protein (hyp1), unknown function	GEXP21	Previous IDs: MAL3P8.14;PFC0080c	136	0	NA	NA	NA	0.0273059	0.740605	0.408125	NA	NA	NA	NA	NA	NA	19.8664	19.8111	20.1284	20.2073	20.3865	20.4364
PF3D7_0301600	Plasmodium falciparum 3D7	Plasmodium exported protein (hyp1), unknown function	GEXP21	Previous IDs: MAL3P8.14;PFC0080c	279	0	NA	NA	NA	0.00869411	0.990737	0.306226	NA	NA	NA	NA	NA	NA	22.899	23.0572	23.1169	23.4853	23.3133	23.1931
PF3D7_0301600	Plasmodium falciparum 3D7	Plasmodium exported protein (hyp1), unknown function	GEXP21	Previous IDs: MAL3P8.14;PFC0080c	425	0	NA	NA	NA	0.736701	0.0602819	-0.00973972	NA	NA	NA	NA	NA	NA	23.6988	22.9709	23.6349	23.7236	22.8433	23.7086
PF3D7_0301600	Plasmodium falciparum 3D7	Plasmodium exported protein (hyp1), unknown function	GEXP21	Previous IDs: MAL3P8.14;PFC0080c	416	0	NA	NA	NA	0.219401	0.262465	-0.0670979	NA	NA	NA	NA	NA	NA	22.6747	22.2039	22.1296	22.2484	22.2103	22.3483
PF3D7_0301600	Plasmodium falciparum 3D7	Plasmodium exported protein (hyp1), unknown function	GEXP21	Previous IDs: MAL3P8.14;PFC0080c	321	0	NA	NA	NA	NA	NA	NA	NA	NA	NA	NA	NA	NA	NA	NA	NA	NA	NA	NA
PF3D7_0301600	Plasmodium falciparum 3D7	Plasmodium exported protein (hyp1), unknown function	GEXP21	Previous IDs: MAL3P8.14;PFC0080c	163	0	NA	NA	NA	0.104256	0.39665	0.347069	NA	NA	NA	NA	NA	NA	26.188	26.3329	26.6437	26.922	26.6864	26.5974
PF3D7_0301600	Plasmodium falciparum 3D7	Plasmodium exported protein (hyp1), unknown function	GEXP21	Previous IDs: MAL3P8.14;PFC0080c	596	0	NA	NA	NA	0.145812	0.31044	0.335675	NA	NA	NA	NA	NA	NA	22.9628	23.2992	23.4905	23.4647	23.5006	23.7942
PF3D7_0301600	Plasmodium falciparum 3D7	Plasmodium exported protein (hyp1), unknown function	GEXP21	Previous IDs: MAL3P8.14;PFC0080c	218	0	NA	NA	NA	0.075595	0.485838	0.385304	NA	NA	NA	NA	NA	NA	22.8511	22.8567	23.0113	23.5563	23.2917	23.027
PF3D7_0301600	Plasmodium falciparum 3D7	Plasmodium exported protein (hyp1), unknown function	GEXP21	Previous IDs: MAL3P8.14;PFC0080c	204	0	NA	NA	NA	0.0247893	0.756533	0.587529	NA	NA	NA	NA	NA	NA	24.7825	24.2287	24.0976	25.0242	24.8184	25.0288
PF3D7_0301700	Plasmodium falciparum 3D7	Plasmodium exported protein, unknown function	N/A	Previous IDs: MAL3P8.15;PFC0085c	174	0	NA	NA	NA	NA	NA	NA	NA	NA	NA	NA	NA	NA	NA	NA	NA	NA	NA	NA
PF3D7_0301700	Plasmodium falciparum 3D7	Plasmodium exported protein, unknown function	N/A	Previous IDs: MAL3P8.15;PFC0085c	173	0	NA	NA	NA	NA	NA	NA	NA	NA	NA	NA	NA	NA	NA	NA	NA	NA	NA	NA
PF3D7_0302200	Plasmodium falciparum 3D7	cytoadherence linked asexual protein 3.2	CLAG3.2	Previous IDs: MAL3P1.2;PFC0110w	1320	0	0.849909	0.042497	-0.0358389	NA	NA	NA	21.4927	21.1572	21.6515	21.5401	21.4525	21.2013	NA	NA	NA	NA	NA	NA
PF3D7_0302200	Plasmodium falciparum 3D7	cytoadherence linked asexual protein 3.2	CLAG3.2	Previous IDs: MAL3P1.2;PFC0110w	1322	0	NA	NA	NA	NA	NA	NA	NA	NA	NA	NA	NA	NA	NA	NA	NA	NA	NA	NA
PF3D7_0302500	Plasmodium falciparum 3D7	cytoadherence linked asexual protein 3.1	CLAG3.1	Previous IDs: MAL3P1.5;PFC0120w	1321	0	0.849909	0.042497	-0.0358389	NA	NA	NA	21.4927	21.1572	21.6515	21.5401	21.4525	21.2013	NA	NA	NA	NA	NA	NA
PF3D7_0302500	Plasmodium falciparum 3D7	cytoadherence linked asexual protein 3.1	CLAG3.1	Previous IDs: MAL3P1.5;PFC0120w	1323	0	0.817633	0.0521928	0.168234	NA	NA	NA	22.5085	23.6062	21.254	22.5296	22.5794	22.7644	NA	NA	NA	NA	NA	NA
PF3D7_0310200	Plasmodium falciparum 3D7	phd finger protein, putative	N/A	Previous IDs: MAL3P3.18;PFC0425w	3329	1	NA	NA	NA	NA	NA	NA	NA	NA	NA	NA	NA	NA	NA	NA	NA	NA	NA	NA
PF3D7_0310200	Plasmodium falciparum 3D7	phd finger protein, putative	N/A	Previous IDs: MAL3P3.18;PFC0425w	3317	1	NA	NA	NA	NA	NA	NA	NA	NA	NA	NA	NA	NA	NA	NA	NA	NA	NA	NA
PF3D7_0310200	Plasmodium falciparum 3D7	phd finger protein, putative	N/A	Previous IDs: MAL3P3.18;PFC0425w	3323	1	NA	NA	NA	NA	NA	NA	NA	NA	NA	NA	NA	NA	NA	NA	NA	NA	NA	NA
PF3D7_0320900	Plasmodium falciparum 3D7	histone H2A.Z	H2A.Z	Previous IDs: MAL3P7.13;PFC0920w	11	0	0.11426	0.546504	-0.251979	NA	NA	NA	22.0559	21.9163	22.1956	21.9669	21.8092	21.6357	NA	NA	NA	NA	NA	NA
PF3D7_0320900	Plasmodium falciparum 3D7	histone H2A.Z	H2A.Z	Previous IDs: MAL3P7.13;PFC0920w	6	0	0.11426	0.546504	-0.251979	NA	NA	NA	22.0559	21.9163	22.1956	21.9669	21.8092	21.6357	NA	NA	NA	NA	NA	NA
PF3D7_0401800	Plasmodium falciparum 3D7	Plasmodium exported protein (PHISTb), unknown function	PfD80	Previous IDs: MAL4P1.16;PFD0080c	390	0	0.232324	0.367278	-0.169946	0.0679984	0.514	0.650569	22.7632	22.5439	23.0287	22.5058	22.8445	22.4756	20.6574	20.767	21.2637	21.903	21.2889	21.4479
PF3D7_0401800	Plasmodium falciparum 3D7	Plasmodium exported protein (PHISTb), unknown function	PfD80	Previous IDs: MAL4P1.16;PFD0080c	378	0	0.258281	0.337512	0.495904	NA	NA	NA	21.6681	21.3391	21.3472	22.1003	22.0148	21.7271	NA	NA	NA	NA	NA	NA
PF3D7_0401800	Plasmodium falciparum 3D7	Plasmodium exported protein (PHISTb), unknown function	PfD80	Previous IDs: MAL4P1.16;PFD0080c	374	0	0.20239	0.403544	0.230346	0.132339	0.336549	0.399839	22.542	22.1516	22.9641	22.8992	22.8397	22.6098	20.3997	20.7899	20.8514	21.2462	21.2298	20.7645
PF3D7_0401800	Plasmodium falciparum 3D7	Plasmodium exported protein (PHISTb), unknown function	PfD80	Previous IDs: MAL4P1.16;PFD0080c	480	0	0.141703	0.496438	-0.00959389	0.250438	0.22477	0.295829	24.0747	24.5058	24.7075	24.558	24.3418	24.3594	22.9806	22.2449	22.4621	22.8064	22.8584	22.9104
PF3D7_0401800	Plasmodium falciparum 3D7	Plasmodium exported protein (PHISTb), unknown function	PfD80	Previous IDs: MAL4P1.16;PFD0080c	397	0	0.652738	0.110262	-0.00322491	NA	NA	NA	22.0557	21.5772	22.2779	21.7428	22.2532	21.905	NA	NA	NA	NA	NA	NA
PF3D7_0401800	Plasmodium falciparum 3D7	Plasmodium exported protein (PHISTb), unknown function	PfD80	Previous IDs: MAL4P1.16;PFD0080c	71	0	NA	NA	NA	NA	NA	NA	NA	NA	NA	NA	NA	NA	NA	NA	NA	NA	NA	NA
PF3D7_0401800	Plasmodium falciparum 3D7	Plasmodium exported protein (PHISTb), unknown function	PfD80	Previous IDs: MAL4P1.16;PFD0080c	399	0	0.0551563	0.741173	-0.160929	NA	NA	NA	22.8503	22.4201	22.9989	22.449	22.7791	22.5583	NA	NA	NA	NA	NA	NA
PF3D7_0401800	Plasmodium falciparum 3D7	Plasmodium exported protein (PHISTb), unknown function	PfD80	Previous IDs: MAL4P1.16;PFD0080c	482	0	0.0957719	0.583395	-0.246	0.250438	0.22477	0.295829	25.1978	24.885	25.1148	24.9768	24.7429	24.7399	22.9806	22.2449	22.4621	22.8064	22.8584	22.9104
PF3D7_0401800	Plasmodium falciparum 3D7	Plasmodium exported protein (PHISTb), unknown function	PfD80	Previous IDs: MAL4P1.16;PFD0080c	347	0	0.756478	0.0682963	0.199351	2.49252e-06	3.5053	0.635017	26.7295	27.154	26.6341	27.2787	26.7688	27.0682	24.8794	24.9566	24.9033	25.4605	25.6129	25.571
PF3D7_0401800	Plasmodium falciparum 3D7	Plasmodium exported protein (PHISTb), unknown function	PfD80	Previous IDs: MAL4P1.16;PFD0080c	413	0	0.481881	0.18795	-0.621532	NA	NA	NA	22.8611	22.9514	21.5428	22.711	22.2435	20.5363	NA	NA	NA	NA	NA	NA
PF3D7_0401800	Plasmodium falciparum 3D7	Plasmodium exported protein (PHISTb), unknown function	PfD80	Previous IDs: MAL4P1.16;PFD0080c	407	0	0.0867717	0.616369	-0.850319	NA	NA	NA	22.6622	21.5207	21.7082	20.9187	21.0625	21.3589	NA	NA	NA	NA	NA	NA
PF3D7_0401800	Plasmodium falciparum 3D7	Plasmodium exported protein (PHISTb), unknown function	PfD80	Previous IDs: MAL4P1.16;PFD0080c	355	0	0.765147	0.0646645	0.0154183	1.888e-07	4.44984	0.597187	26.5945	27.2231	26.4662	26.9411	26.4523	26.9367	25.3966	25.1904	25.2637	25.8328	25.9482	25.8612
PF3D7_0402100	Plasmodium falciparum 3D7	Plasmodium exported protein (PHISTb), unknown function	N/A	Previous IDs: MAL4P1.19;PFD0095c	123	0	0.400527	0.232229	0.351452	0.0163754	0.793874	0.598129	23.3702	23.8203	22.92	24.099	23.8648	23.2011	22.3568	22.5852	22.1284	22.9549	22.8303	23.0795
PF3D7_0402100	Plasmodium falciparum 3D7	Plasmodium exported protein (PHISTb), unknown function	N/A	Previous IDs: MAL4P1.19;PFD0095c	305	0	0.145442	0.488101	0.359706	0.329538	0.178748	-0.334135	22.1028	22.1417	21.6102	22.33	22.524	22.0798	21.5612	21.9561	21.8412	21.6983	21.7595	20.8982
PF3D7_0402100	Plasmodium falciparum 3D7	Plasmodium exported protein (PHISTb), unknown function	N/A	Previous IDs: MAL4P1.19;PFD0095c	390	0	0.223606	0.375173	0.402483	0.257599	0.220694	0.291294	20.9966	21.1538	20.8549	21.5836	21.4041	21.225	22.3598	22.3289	22.3422	22.7701	22.6783	22.4563
PF3D7_0402100	Plasmodium falciparum 3D7	Plasmodium exported protein (PHISTb), unknown function	N/A	Previous IDs: MAL4P1.19;PFD0095c	395	0	0.505777	0.175727	0.187504	0.398699	0.148449	0.163105	22.397	22.3323	21.7237	22.6179	22.1627	22.2349	23.4845	23.2647	23.3899	23.8377	23.2849	23.5058
PF3D7_0402100	Plasmodium falciparum 3D7	Plasmodium exported protein (PHISTb), unknown function	N/A	Previous IDs: MAL4P1.19;PFD0095c	383	0	0.239909	0.357377	0.256926	0.0114858	0.914879	0.450829	20.1443	20.0417	19.5771	20.1779	20.2909	20.065	20.2401	20.447	20.1292	20.7363	20.7871	20.6454
PF3D7_0402400	Plasmodium falciparum 3D7	Plasmodium exported protein, unknown function	GEXP18	Previous IDs: MAL4P1.23;PFD0115c	95	0	NA	NA	NA	0.0451873	0.604608	0.541475	NA	NA	NA	NA	NA	NA	22.4777	22.3428	22.3405	23.2888	22.8008	22.6958
PF3D7_0402400	Plasmodium falciparum 3D7	Plasmodium exported protein, unknown function	GEXP18	Previous IDs: MAL4P1.23;PFD0115c	103	0	NA	NA	NA	NA	NA	NA	NA	NA	NA	NA	NA	NA	NA	NA	NA	NA	NA	NA
PF3D7_0406500	Plasmodium falciparum 3D7	NYN domain-containing protein, putative	N/A	Previous IDs: MAL4P1.63;PFD0320c	2298	1	NA	NA	NA	NA	NA	NA	NA	NA	NA	NA	NA	NA	NA	NA	NA	NA	NA	NA
PF3D7_0406500	Plasmodium falciparum 3D7	NYN domain-containing protein, putative	N/A	Previous IDs: MAL4P1.63;PFD0320c	1690	0	NA	NA	NA	NA	NA	NA	NA	NA	NA	NA	NA	NA	NA	NA	NA	NA	NA	NA
PF3D7_0406500	Plasmodium falciparum 3D7	NYN domain-containing protein, putative	N/A	Previous IDs: MAL4P1.63;PFD0320c	2301	1	NA	NA	NA	NA	NA	NA	NA	NA	NA	NA	NA	NA	NA	NA	NA	NA	NA	NA
PF3D7_0424500	Plasmodium falciparum 3D7	serine/threonine protein kinase, FIKK family	FIKK4.1	Previous IDs: MAL4P1.228;PFD1165w	222	0	0.0160698	1.06439	3.2034	NA	NA	NA	16.996	18.118	19.5847	21.3541	21.9564	20.9983	NA	NA	NA	NA	NA	NA
PF3D7_0424500	Plasmodium falciparum 3D7	serine/threonine protein kinase, FIKK family	FIKK4.1	Previous IDs: MAL4P1.228;PFD1165w	409	0	0.00704051	1.32745	-2.4617	0.000313846	1.9281	-2.18569	20.989	21.0924	21.0219	18.5222	19.4331	17.7628	20.8399	21.2927	20.8278	18.6213	19.2003	18.5818
PF3D7_0424500	Plasmodium falciparum 3D7	serine/threonine protein kinase, FIKK family	FIKK4.1	Previous IDs: MAL4P1.228;PFD1165w	228	0	0.0160698	1.06439	3.2034	NA	NA	NA	16.996	18.118	19.5847	21.3541	21.9564	20.9983	NA	NA	NA	NA	NA	NA
PF3D7_0424500	Plasmodium falciparum 3D7	serine/threonine protein kinase, FIKK family	FIKK4.1	Previous IDs: MAL4P1.228;PFD1165w	219	0	NA	NA	NA	NA	NA	NA	NA	NA	NA	NA	NA	NA	NA	NA	NA	NA	NA	NA
PF3D7_0424500	Plasmodium falciparum 3D7	serine/threonine protein kinase, FIKK family	FIKK4.1	Previous IDs: MAL4P1.228;PFD1165w	231	0	0.000306183	2.18831	1.69109	0.00743241	1.0235	3.50628	21.8181	21.6094	22.0184	23.362	23.6516	23.5055	18.7603	20.9975	19.7785	23.2204	23.8661	22.9686
PF3D7_0424500	Plasmodium falciparum 3D7	serine/threonine protein kinase, FIKK family	FIKK4.1	Previous IDs: MAL4P1.228;PFD1165w	422	0	0.00341454	1.48765	-0.933416	NA	NA	NA	19.4879	19.0105	19.1296	18.3241	18.1867	18.3169	NA	NA	NA	NA	NA	NA
PF3D7_0424600	Plasmodium falciparum 3D7	Plasmodium exported protein (PHISTb)	N/A	Previous IDs: MAL4P1.229;PFD1170c	188	0	NA	NA	NA	NA	NA	NA	NA	NA	NA	NA	NA	NA	NA	NA	NA	NA	NA	NA
PF3D7_0424700	Plasmodium falciparum 3D7	serine/threonine protein kinase, FIKK family	FIKK4.2	Previous IDs: MAL4P1.230;PFD1175w	97	0	0.11531	0.545775	-0.229376	NA	NA	NA	19.4422	19.2473	19.6372	19.178	19.2128	19.2477	NA	NA	NA	NA	NA	NA
PF3D7_0424700	Plasmodium falciparum 3D7	serine/threonine protein kinase, FIKK family	FIKK4.2	Previous IDs: MAL4P1.230;PFD1175w	267	0	0.495103	0.180961	-0.378056	0.641103	0.081011	-0.139828	23.2272	22.7122	23.8485	22.1201	23.2396	23.2941	22.814	23.2294	23.6814	22.9016	23.0873	23.3165
PF3D7_0424700	Plasmodium falciparum 3D7	serine/threonine protein kinase, FIKK family	FIKK4.2	Previous IDs: MAL4P1.230;PFD1175w	281	0	0.157581	0.463689	-0.30968	NA	NA	NA	21.1727	21.3854	21.1693	21.2159	20.6497	20.9328	NA	NA	NA	NA	NA	NA
PF3D7_0424800	Plasmodium falciparum 3D7	Plasmodium exported protein (PHISTb), unknown function	N/A	Previous IDs: MAL4P1.231;PFD1180w	92	0	NA	NA	NA	NA	NA	NA	NA	NA	NA	NA	NA	NA	NA	NA	NA	NA	NA	NA
PF3D7_0424900	Plasmodium falciparum 3D7	Plasmodium exported protein (PHISTa), unknown function	N/A	Previous IDs: MAL4P1.232;PFD1185w	124	0	0.253589	0.344086	-0.375666	NA	NA	NA	19.8521	19.7227	20.2336	19.1632	19.5364	19.9818	NA	NA	NA	NA	NA	NA
PF3D7_0424900	Plasmodium falciparum 3D7	Plasmodium exported protein (PHISTa), unknown function	N/A	Previous IDs: MAL4P1.232;PFD1185w	202	0	NA	NA	NA	NA	NA	NA	NA	NA	NA	NA	NA	NA	NA	NA	NA	NA	NA	NA
PF3D7_0424900	Plasmodium falciparum 3D7	Plasmodium exported protein (PHISTa), unknown function	N/A	Previous IDs: MAL4P1.232;PFD1185w	123	0	0.0278598	0.923998	-0.305164	NA	NA	NA	19.9481	19.9268	20.1605	19.4588	19.7387	19.9224	NA	NA	NA	NA	NA	NA
PF3D7_0424900	Plasmodium falciparum 3D7	Plasmodium exported protein (PHISTa), unknown function	N/A	Previous IDs: MAL4P1.232;PFD1185w	199	0	NA	NA	NA	NA	NA	NA	NA	NA	NA	NA	NA	NA	NA	NA	NA	NA	NA	NA
PF3D7_0500800	Plasmodium falciparum 3D7	mature parasite-infected erythrocyte surface antigen	MESA	Previous IDs: MAL5P1.9;PFE0040c	1136	0	0.222286	0.376064	0.560335	NA	NA	NA	22.6712	21.6732	21.6232	22.2296	22.8695	22.5495	NA	NA	NA	NA	NA	NA
PF3D7_0500800	Plasmodium falciparum 3D7	mature parasite-infected erythrocyte surface antigen	MESA	Previous IDs: MAL5P1.9;PFE0040c	617	0	0.217676	0.380194	-0.314036	0.348855	0.167711	-0.481887	21.9202	22.4169	22.1882	21.543	21.9917	22.0485	19.8189	20.4824	19.49	18.7599	19.6998	19.8859
PF3D7_0500800	Plasmodium falciparum 3D7	mature parasite-infected erythrocyte surface antigen	MESA	Previous IDs: MAL5P1.9;PFE0040c	1171	0	NA	NA	NA	NA	NA	NA	NA	NA	NA	NA	NA	NA	NA	NA	NA	NA	NA	NA
PF3D7_0500800	Plasmodium falciparum 3D7	mature parasite-infected erythrocyte surface antigen	MESA	Previous IDs: MAL5P1.9;PFE0040c	1378	0	0.0658966	0.682476	0.416636	0.0661158	0.522474	0.483124	23.5187	23.0103	23.4253	23.3298	23.975	23.8994	20.7812	21.4832	21.1013	21.6411	21.4011	21.7729
PF3D7_0500800	Plasmodium falciparum 3D7	mature parasite-infected erythrocyte surface antigen	MESA	Previous IDs: MAL5P1.9;PFE0040c	162	0	NA	NA	NA	NA	NA	NA	NA	NA	NA	NA	NA	NA	NA	NA	NA	NA	NA	NA
PF3D7_0500800	Plasmodium falciparum 3D7	mature parasite-infected erythrocyte surface antigen	MESA	Previous IDs: MAL5P1.9;PFE0040c	1144	0	0.126537	0.52314	0.345196	NA	NA	NA	21.691	21.1811	21.6888	21.8443	21.8081	21.944	NA	NA	NA	NA	NA	NA
PF3D7_0500800	Plasmodium falciparum 3D7	mature parasite-infected erythrocyte surface antigen	MESA	Previous IDs: MAL5P1.9;PFE0040c	584	0	0.268717	0.326939	-0.321187	0.591429	0.0914521	-0.286921	22.342	22.702	22.5954	21.7759	22.3859	22.5141	21.0468	21.3913	20.7979	20.5885	20.1137	21.673
PF3D7_0500800	Plasmodium falciparum 3D7	mature parasite-infected erythrocyte surface antigen	MESA	Previous IDs: MAL5P1.9;PFE0040c	1186	0	0.360002	0.251853	-0.17994	0.37266	0.158851	-0.204041	22.6416	22.3874	22.4569	22.1617	22.2024	22.582	19.1397	19.3495	19.7346	19.0218	19.2039	19.386
PF3D7_0500800	Plasmodium falciparum 3D7	mature parasite-infected erythrocyte surface antigen	MESA	Previous IDs: MAL5P1.9;PFE0040c	1119	0	0.842336	0.0438433	0.164026	NA	NA	NA	22.0725	22.8805	21.2645	21.1977	22.1811	23.3308	NA	NA	NA	NA	NA	NA
PF3D7_0500800	Plasmodium falciparum 3D7	mature parasite-infected erythrocyte surface antigen	MESA	Previous IDs: MAL5P1.9;PFE0040c	681	0	0.0501872	0.763626	-0.627282	NA	NA	NA	19.3971	19.6214	19.5093	18.4637	18.9926	19.1897	NA	NA	NA	NA	NA	NA
PF3D7_0500800	Plasmodium falciparum 3D7	mature parasite-infected erythrocyte surface antigen	MESA	Previous IDs: MAL5P1.9;PFE0040c	799	0	0.368389	0.245869	-0.494064	0.177802	0.288818	0.368382	21.772	22.5307	21.0132	20.9178	21.2558	21.66	21.4448	21.2439	21.6456	22.1483	21.8132	21.478
PF3D7_0500800	Plasmodium falciparum 3D7	mature parasite-infected erythrocyte surface antigen	MESA	Previous IDs: MAL5P1.9;PFE0040c	430	0	NA	NA	NA	NA	NA	NA	NA	NA	NA	NA	NA	NA	NA	NA	NA	NA	NA	NA
PF3D7_0500800	Plasmodium falciparum 3D7	mature parasite-infected erythrocyte surface antigen	MESA	Previous IDs: MAL5P1.9;PFE0040c	1185	0	0.241223	0.357377	-0.180388	0.37266	0.158851	-0.204041	22.8057	22.8109	22.8237	22.4179	22.6084	22.8727	19.1397	19.3495	19.7346	19.0218	19.2039	19.386
PF3D7_0500800	Plasmodium falciparum 3D7	mature parasite-infected erythrocyte surface antigen	MESA	Previous IDs: MAL5P1.9;PFE0040c	135	0	0.322189	0.291181	0.228461	NA	NA	NA	22.7314	22.4395	22.2152	22.9568	22.6099	22.5048	NA	NA	NA	NA	NA	NA
PF3D7_0500800	Plasmodium falciparum 3D7	mature parasite-infected erythrocyte surface antigen	MESA	Previous IDs: MAL5P1.9;PFE0040c	830	0	0.0501872	0.763626	-0.627282	NA	NA	NA	19.3971	19.6214	19.5093	18.4637	18.9926	19.1897	NA	NA	NA	NA	NA	NA
PF3D7_0500800	Plasmodium falciparum 3D7	mature parasite-infected erythrocyte surface antigen	MESA	Previous IDs: MAL5P1.9;PFE0040c	650	0	0.186496	0.423605	-0.458086	NA	NA	NA	21.4123	21.8195	21.5661	20.5916	21.3994	21.4326	NA	NA	NA	NA	NA	NA
PF3D7_0500800	Plasmodium falciparum 3D7	mature parasite-infected erythrocyte surface antigen	MESA	Previous IDs: MAL5P1.9;PFE0040c	164	0	0.0579014	0.729976	-0.513193	NA	NA	NA	21.7563	22.2599	21.4921	21.1127	21.3691	21.4868	NA	NA	NA	NA	NA	NA
PF3D7_0500800	Plasmodium falciparum 3D7	mature parasite-infected erythrocyte surface antigen	MESA	Previous IDs: MAL5P1.9;PFE0040c	190	0	0.00200424	1.64602	0.687899	0.592999	0.0910911	0.270363	27.122	26.4565	27.2041	27.2605	27.964	27.6218	26.6747	25.9329	27.9183	27.0817	26.9665	27.2887
PF3D7_0500800	Plasmodium falciparum 3D7	mature parasite-infected erythrocyte surface antigen	MESA	Previous IDs: MAL5P1.9;PFE0040c	466	0	0.00530007	1.40385	0.458564	NA	NA	NA	19.4642	19.3629	19.5859	19.9569	20.004	19.8277	NA	NA	NA	NA	NA	NA
PF3D7_0500800	Plasmodium falciparum 3D7	mature parasite-infected erythrocyte surface antigen	MESA	Previous IDs: MAL5P1.9;PFE0040c	861	0	NA	NA	NA	NA	NA	NA	NA	NA	NA	NA	NA	NA	NA	NA	NA	NA	NA	NA
PF3D7_0500800	Plasmodium falciparum 3D7	mature parasite-infected erythrocyte surface antigen	MESA	Previous IDs: MAL5P1.9;PFE0040c	1300	0	0.380219	0.24346	0.611624	NA	NA	NA	24.2218	25.0231	23.3986	24.8456	24.8312	24.8015	NA	NA	NA	NA	NA	NA
PF3D7_0500800	Plasmodium falciparum 3D7	mature parasite-infected erythrocyte surface antigen	MESA	Previous IDs: MAL5P1.9;PFE0040c	181	0	0.947309	0.0160509	0.0886243	NA	NA	NA	22.3041	23.281	21.8857	22.4937	22.4329	22.8102	NA	NA	NA	NA	NA	NA
PF3D7_0500800	Plasmodium falciparum 3D7	mature parasite-infected erythrocyte surface antigen	MESA	Previous IDs: MAL5P1.9;PFE0040c	708	0	NA	NA	NA	NA	NA	NA	NA	NA	NA	NA	NA	NA	NA	NA	NA	NA	NA	NA
PF3D7_0500800	Plasmodium falciparum 3D7	mature parasite-infected erythrocyte surface antigen	MESA	Previous IDs: MAL5P1.9;PFE0040c	832	0	0.0501872	0.763626	-0.627282	NA	NA	NA	19.3971	19.6214	19.5093	18.4637	18.9926	19.1897	NA	NA	NA	NA	NA	NA
PF3D7_0500800	Plasmodium falciparum 3D7	mature parasite-infected erythrocyte surface antigen	MESA	Previous IDs: MAL5P1.9;PFE0040c	552	0	NA	NA	NA	NA	NA	NA	NA	NA	NA	NA	NA	NA	NA	NA	NA	NA	NA	NA
PF3D7_0500800	Plasmodium falciparum 3D7	mature parasite-infected erythrocyte surface antigen	MESA	Previous IDs: MAL5P1.9;PFE0040c	1379	0	NA	NA	NA	NA	NA	NA	NA	NA	NA	NA	NA	NA	NA	NA	NA	NA	NA	NA
PF3D7_0500800	Plasmodium falciparum 3D7	mature parasite-infected erythrocyte surface antigen	MESA	Previous IDs: MAL5P1.9;PFE0040c	199	0	0.0538132	0.749077	-0.318947	0.760211	0.0550924	-0.0921381	25.536	25.6482	25.6339	25.0607	25.2173	25.5832	23.6638	24.0343	23.8322	23.5023	23.7847	23.9669
PF3D7_0500800	Plasmodium falciparum 3D7	mature parasite-infected erythrocyte surface antigen	MESA	Previous IDs: MAL5P1.9;PFE0040c	1140	0	0.0176573	1.02763	0.400494	NA	NA	NA	20.9303	20.5735	21.0239	21.1942	21.1901	21.3448	NA	NA	NA	NA	NA	NA
PF3D7_0500800	Plasmodium falciparum 3D7	mature parasite-infected erythrocyte surface antigen	MESA	Previous IDs: MAL5P1.9;PFE0040c	764	0	0.32743	0.285407	0.680301	0.745837	0.0586733	-0.0506481	28.0085	28.9539	27.3196	28.1027	28.7848	29.4354	26.408	26.4006	26.089	26.4453	26.19	26.1103
PF3D7_0500800	Plasmodium falciparum 3D7	mature parasite-infected erythrocyte surface antigen	MESA	Previous IDs: MAL5P1.9;PFE0040c	543	0	0.413254	0.22654	0.0413267	0.143204	0.314179	0.406978	22.1772	22.1103	22.0067	21.9978	22.0618	22.3585	20.7883	21.1563	21.5244	21.5633	21.6853	21.4414
PF3D7_0500800	Plasmodium falciparum 3D7	mature parasite-infected erythrocyte surface antigen	MESA	Previous IDs: MAL5P1.9;PFE0040c	995	0	0.582897	0.138567	-0.367182	0.836709	0.0332944	0.0406999	24.3375	25.0547	23.7504	23.4831	24.121	24.4369	21.326	20.7309	20.9022	21.027	21.1214	20.9327
PF3D7_0500800	Plasmodium falciparum 3D7	mature parasite-infected erythrocyte surface antigen	MESA	Previous IDs: MAL5P1.9;PFE0040c	1192	0	0.241223	0.357377	-0.180388	0.37266	0.158851	-0.204041	22.8057	22.8109	22.8237	22.4179	22.6084	22.8727	19.1397	19.3495	19.7346	19.0218	19.2039	19.386
PF3D7_0500800	Plasmodium falciparum 3D7	mature parasite-infected erythrocyte surface antigen	MESA	Previous IDs: MAL5P1.9;PFE0040c	787	0	0.107534	0.556273	-0.886833	NA	NA	NA	19.6315	19.4101	19.8471	17.5078	19.1244	19.5959	NA	NA	NA	NA	NA	NA
PF3D7_0500800	Plasmodium falciparum 3D7	mature parasite-infected erythrocyte surface antigen	MESA	Previous IDs: MAL5P1.9;PFE0040c	993	0	0.458791	0.201879	-0.394099	NA	NA	NA	25.0503	25.4859	24.2671	23.8971	24.8082	24.9158	NA	NA	NA	NA	NA	NA
PF3D7_0500800	Plasmodium falciparum 3D7	mature parasite-infected erythrocyte surface antigen	MESA	Previous IDs: MAL5P1.9;PFE0040c	733	0	NA	NA	NA	NA	NA	NA	NA	NA	NA	NA	NA	NA	NA	NA	NA	NA	NA	NA
PF3D7_0500800	Plasmodium falciparum 3D7	mature parasite-infected erythrocyte surface antigen	MESA	Previous IDs: MAL5P1.9;PFE0040c	1317	0	0.38941	0.238723	0.546788	NA	NA	NA	23.9446	23.9714	22.3668	24.2067	23.5761	24.1402	NA	NA	NA	NA	NA	NA
PF3D7_0500800	Plasmodium falciparum 3D7	mature parasite-infected erythrocyte surface antigen	MESA	Previous IDs: MAL5P1.9;PFE0040c	1123	0	0.995621	0.00151651	-0.0547673	0.498953	0.1097	0.0490173	25.2896	26.1813	24.7917	24.914	25.3919	25.7924	24.0146	23.7182	23.5695	23.7126	23.8504	23.8862
PF3D7_0500800	Plasmodium falciparum 3D7	mature parasite-infected erythrocyte surface antigen	MESA	Previous IDs: MAL5P1.9;PFE0040c	797	0	0.368389	0.245869	-0.494064	NA	NA	NA	21.772	22.5307	21.0132	20.9178	21.2558	21.66	NA	NA	NA	NA	NA	NA
PF3D7_0500800	Plasmodium falciparum 3D7	mature parasite-infected erythrocyte surface antigen	MESA	Previous IDs: MAL5P1.9;PFE0040c	885	0	0.172771	0.441551	0.343978	0.83285	0.033568	0.262232	23.4875	23.4542	23.8308	23.9865	23.9667	23.8512	20.9175	19.391	22.4439	19.8616	21.1797	22.4978
PF3D7_0500800	Plasmodium falciparum 3D7	mature parasite-infected erythrocyte surface antigen	MESA	Previous IDs: MAL5P1.9;PFE0040c	865	0	NA	NA	NA	NA	NA	NA	NA	NA	NA	NA	NA	NA	NA	NA	NA	NA	NA	NA
PF3D7_0500800	Plasmodium falciparum 3D7	mature parasite-infected erythrocyte surface antigen	MESA	Previous IDs: MAL5P1.9;PFE0040c	1156	0	0.734224	0.0786189	-0.157069	0.571506	0.0982876	-0.301478	24.4296	25.2078	24.4075	24.3929	24.6231	24.5577	21.9167	23.2294	21.6794	21.9535	22.1336	21.834
PF3D7_0500800	Plasmodium falciparum 3D7	mature parasite-infected erythrocyte surface antigen	MESA	Previous IDs: MAL5P1.9;PFE0040c	313	0	0.572185	0.143701	0.0605212	0.602978	0.0877735	-0.0801492	24.9014	25.0648	24.7307	24.782	25.0962	25.0002	24.2661	24.116	24.2382	24.0463	24.135	24.1985
PF3D7_0500800	Plasmodium falciparum 3D7	mature parasite-infected erythrocyte surface antigen	MESA	Previous IDs: MAL5P1.9;PFE0040c	316	0	0.430292	0.218393	-0.0457428	0.496134	0.1097	-0.0421882	24.9315	25.0444	24.6563	24.5732	24.9748	24.947	24.5872	24.2899	24.4361	24.4904	24.3137	24.3824
PF3D7_0500800	Plasmodium falciparum 3D7	mature parasite-infected erythrocyte surface antigen	MESA	Previous IDs: MAL5P1.9;PFE0040c	1135	0	0.222286	0.376064	0.560335	NA	NA	NA	22.6712	21.6732	21.6232	22.2296	22.8695	22.5495	NA	NA	NA	NA	NA	NA
PF3D7_0500800	Plasmodium falciparum 3D7	mature parasite-infected erythrocyte surface antigen	MESA	Previous IDs: MAL5P1.9;PFE0040c	586	0	0.343569	0.268192	-0.328339	0.591429	0.0914521	-0.286921	22.7639	22.9871	23.0026	22.0087	22.7801	22.9796	21.0468	21.3913	20.7979	20.5885	20.1137	21.673
PF3D7_0500800	Plasmodium falciparum 3D7	mature parasite-infected erythrocyte surface antigen	MESA	Previous IDs: MAL5P1.9;PFE0040c	304	0	0.119023	0.539233	-0.538751	NA	NA	NA	19.8952	20.0553	19.7546	19.1829	19.7485	19.1574	NA	NA	NA	NA	NA	NA
PF3D7_0500800	Plasmodium falciparum 3D7	mature parasite-infected erythrocyte surface antigen	MESA	Previous IDs: MAL5P1.9;PFE0040c	619	0	NA	NA	NA	0.348855	0.167711	-0.481887	NA	NA	NA	NA	NA	NA	19.8189	20.4824	19.49	18.7599	19.6998	19.8859
PF3D7_0500800	Plasmodium falciparum 3D7	mature parasite-infected erythrocyte surface antigen	MESA	Previous IDs: MAL5P1.9;PFE0040c	840	0	0.0267568	0.936521	-0.479122	NA	NA	NA	22.1345	22.1929	21.6299	21.4401	21.5539	21.5259	NA	NA	NA	NA	NA	NA
PF3D7_0500800	Plasmodium falciparum 3D7	mature parasite-infected erythrocyte surface antigen	MESA	Previous IDs: MAL5P1.9;PFE0040c	1371	0	0.0991036	0.576383	0.446307	0.425183	0.139645	0.15547	23.8606	24.2414	23.5272	24.4646	24.3597	24.1438	21.5319	21.3509	21.1699	21.2563	21.5195	21.7433
PF3D7_0500800	Plasmodium falciparum 3D7	mature parasite-infected erythrocyte surface antigen	MESA	Previous IDs: MAL5P1.9;PFE0040c	340	0	0.194691	0.414728	-0.242112	NA	NA	NA	21.3506	21.1255	21.1609	21.0165	21.0849	20.8093	NA	NA	NA	NA	NA	NA
PF3D7_0500800	Plasmodium falciparum 3D7	mature parasite-infected erythrocyte surface antigen	MESA	Previous IDs: MAL5P1.9;PFE0040c	1373	0	0.0918812	0.596564	0.369874	0.359075	0.165221	0.319998	23.8808	24.1022	23.6471	24.2857	24.268	24.186	21.6564	22.1947	21.8687	22.0939	22.1716	22.4143
PF3D7_0500800	Plasmodium falciparum 3D7	mature parasite-infected erythrocyte surface antigen	MESA	Previous IDs: MAL5P1.9;PFE0040c	549	0	0.0825646	0.626328	-0.122088	NA	NA	NA	21.244	21.1726	20.9977	21.0316	20.9372	21.0791	NA	NA	NA	NA	NA	NA
PF3D7_0500800	Plasmodium falciparum 3D7	mature parasite-infected erythrocyte surface antigen	MESA	Previous IDs: MAL5P1.9;PFE0040c	1289	0	0.00406706	1.47978	-0.177362	NA	NA	NA	23.9409	23.8625	23.2163	23.5726	23.5601	23.3549	NA	NA	NA	NA	NA	NA
PF3D7_0500800	Plasmodium falciparum 3D7	mature parasite-infected erythrocyte surface antigen	MESA	Previous IDs: MAL5P1.9;PFE0040c	652	0	0.20962	0.391325	-0.602136	NA	NA	NA	20.9043	21.2221	20.944	19.6402	20.8072	20.8167	NA	NA	NA	NA	NA	NA
PF3D7_0500800	Plasmodium falciparum 3D7	mature parasite-infected erythrocyte surface antigen	MESA	Previous IDs: MAL5P1.9;PFE0040c	683	0	0.0694595	0.669106	-0.679852	NA	NA	NA	21.9154	22.2429	21.3633	20.8297	21.0785	21.5739	NA	NA	NA	NA	NA	NA
PF3D7_0500800	Plasmodium falciparum 3D7	mature parasite-infected erythrocyte surface antigen	MESA	Previous IDs: MAL5P1.9;PFE0040c	1174	0	NA	NA	NA	NA	NA	NA	NA	NA	NA	NA	NA	NA	NA	NA	NA	NA	NA	NA
PF3D7_0500800	Plasmodium falciparum 3D7	mature parasite-infected erythrocyte surface antigen	MESA	Previous IDs: MAL5P1.9;PFE0040c	169	0	0.425705	0.220068	-0.233842	NA	NA	NA	22.7518	23.8498	21.9257	22.5805	22.5948	22.6506	NA	NA	NA	NA	NA	NA
PF3D7_0500800	Plasmodium falciparum 3D7	mature parasite-infected erythrocyte surface antigen	MESA	Previous IDs: MAL5P1.9;PFE0040c	895	0	NA	NA	NA	NA	NA	NA	NA	NA	NA	NA	NA	NA	NA	NA	NA	NA	NA	NA
PF3D7_0500800	Plasmodium falciparum 3D7	mature parasite-infected erythrocyte surface antigen	MESA	Previous IDs: MAL5P1.9;PFE0040c	126	0	NA	NA	NA	NA	NA	NA	NA	NA	NA	NA	NA	NA	NA	NA	NA	NA	NA	NA
PF3D7_0500800	Plasmodium falciparum 3D7	mature parasite-infected erythrocyte surface antigen	MESA	Previous IDs: MAL5P1.9;PFE0040c	154	0	0.707083	0.0879099	0.141771	NA	NA	NA	20.5757	20.8843	20.2575	20.7143	20.193	21.2355	NA	NA	NA	NA	NA	NA
PF3D7_0500800	Plasmodium falciparum 3D7	mature parasite-infected erythrocyte surface antigen	MESA	Previous IDs: MAL5P1.9;PFE0040c	859	0	NA	NA	NA	NA	NA	NA	NA	NA	NA	NA	NA	NA	NA	NA	NA	NA	NA	NA
PF3D7_0500800	Plasmodium falciparum 3D7	mature parasite-infected erythrocyte surface antigen	MESA	Previous IDs: MAL5P1.9;PFE0040c	891	0	0.00764385	1.30455	-0.435227	NA	NA	NA	23.2074	23.1473	22.8693	22.5242	22.5489	22.8453	NA	NA	NA	NA	NA	NA
PF3D7_0500800	Plasmodium falciparum 3D7	mature parasite-infected erythrocyte surface antigen	MESA	Previous IDs: MAL5P1.9;PFE0040c	334	0	0.843962	0.0434637	-0.0605908	NA	NA	NA	21.5266	20.6043	21.0655	21.0049	21.1976	20.8121	NA	NA	NA	NA	NA	NA
PF3D7_0500800	Plasmodium falciparum 3D7	mature parasite-infected erythrocyte surface antigen	MESA	Previous IDs: MAL5P1.9;PFE0040c	1178	0	NA	NA	NA	NA	NA	NA	NA	NA	NA	NA	NA	NA	NA	NA	NA	NA	NA	NA
PF3D7_0500800	Plasmodium falciparum 3D7	mature parasite-infected erythrocyte surface antigen	MESA	Previous IDs: MAL5P1.9;PFE0040c	674	0	0.259044	0.336922	-0.732422	NA	NA	NA	24.4336	24.8644	23.2173	23.1958	23.1643	23.958	NA	NA	NA	NA	NA	NA
PF3D7_0500800	Plasmodium falciparum 3D7	mature parasite-infected erythrocyte surface antigen	MESA	Previous IDs: MAL5P1.9;PFE0040c	1302	0	0.380219	0.24346	0.611624	NA	NA	NA	24.2218	25.0231	23.3986	24.8456	24.8312	24.8015	NA	NA	NA	NA	NA	NA
PF3D7_0501100	Plasmodium falciparum 3D7	co-chaperone J domain protein JDP	HSP40	Previous IDs: MAL5P1.12;PF3D7_0501100.1;PF3D7_0501100.2;PFE0055c	111	0	NA	NA	NA	0.728538	0.0613185	-0.0503197	NA	NA	NA	NA	NA	NA	22.3339	22.5162	22.3619	22.4395	22.3747	22.2468
PF3D7_0501100	Plasmodium falciparum 3D7	co-chaperone J domain protein JDP	HSP40	Previous IDs: MAL5P1.12;PF3D7_0501100.1;PF3D7_0501100.2;PFE0055c	75	0	NA	NA	NA	0.0253942	0.756533	1.63041	NA	NA	NA	NA	NA	NA	18.7087	18.8309	20.1028	20.8571	21.0892	20.5872
PF3D7_0501200	Plasmodium falciparum 3D7	parasite-infected erythrocyte surface protein	PIESP2	Previous IDs: MAL5P1.13;PFE0060w	63	0	0.27283	0.323835	0.112323	0.0125814	0.881584	-0.33763	24.8123	24.6043	24.1959	24.7369	24.6134	24.5991	25.6203	25.2486	25.3954	25.1643	24.9509	25.1362
PF3D7_0501200	Plasmodium falciparum 3D7	parasite-infected erythrocyte surface protein	PIESP2	Previous IDs: MAL5P1.13;PFE0060w	69	0	0.0971775	0.581321	0.308491	0.104565	0.39665	-0.438891	24.4396	24.5292	24.2015	24.8937	24.6653	24.5368	25.267	24.7028	24.8287	24.6425	24.2531	24.5863
PF3D7_0501300	Plasmodium falciparum 3D7	skeleton-binding protein 1	SBP1	Previous IDs: MAL5P1.14;PFE0065w	331	0	NA	NA	NA	NA	NA	NA	NA	NA	NA	NA	NA	NA	NA	NA	NA	NA	NA	NA
PF3D7_0508000	Plasmodium falciparum 3D7	6-cysteine protein	P38	Previous IDs: MAL5P1.81;PFE0395c	310	0	NA	NA	NA	NA	NA	NA	NA	NA	NA	NA	NA	NA	NA	NA	NA	NA	NA	NA
PF3D7_0511500	Plasmodium falciparum 3D7	RNA pseudouridylate synthase, putative	N/A	Previous IDs: MAL5P1.115;PFE0570w	2901	0	NA	NA	NA	NA	NA	NA	NA	NA	NA	NA	NA	NA	NA	NA	NA	NA	NA	NA
PF3D7_0520800	Plasmodium falciparum 3D7	conserved protein, unknown function	N/A	Previous IDs: MAL5P1.209;PFE1045c	265	0	0.0106355	1.19275	-0.240506	NA	NA	NA	22.1802	22.1876	22.0266	21.9077	21.8792	21.8861	NA	NA	NA	NA	NA	NA
PF3D7_0524000	Plasmodium falciparum 3D7	karyopherin beta	KASbeta	Previous IDs: MAL5P1.239;PFE1195w	1095	0	0.259651	0.336639	-0.405137	0.255827	0.222341	-0.274751	22.1713	22.2873	22.2293	21.9614	21.2374	22.2737	22.6867	22.2498	22.639	21.9456	22.3592	22.4464
PF3D7_0532300	Plasmodium falciparum 3D7	Plasmodium exported protein (PHISTb), unknown function	N/A	Previous IDs: MAL5P1.314;PFE1600w	338	0	0.74152	0.0753345	0.264657	0.380393	0.155273	-0.137825	25.601	25.1087	25.5032	26.0381	25.5713	25.3975	25.0224	25.2798	25.3318	25.0067	25.211	25.0029
PF3D7_0532300	Plasmodium falciparum 3D7	Plasmodium exported protein (PHISTb), unknown function	N/A	Previous IDs: MAL5P1.314;PFE1600w	106	0	0.493156	0.180961	0.0630024	0.0229591	0.776032	-0.236244	23.3744	23.1602	23.5198	23.7844	23.1943	23.2648	22.1442	22.2571	22.2567	22.0532	22.0053	21.8908
PF3D7_0532300	Plasmodium falciparum 3D7	Plasmodium exported protein (PHISTb), unknown function	N/A	Previous IDs: MAL5P1.314;PFE1600w	356	0	0.00385679	1.48765	0.715784	0.381381	0.155207	-0.133018	26.9672	27.3676	27.1751	27.8502	27.8828	27.9243	28.9778	29.0031	28.9394	28.6074	28.8419	29.0719
PF3D7_0532300	Plasmodium falciparum 3D7	Plasmodium exported protein (PHISTb), unknown function	N/A	Previous IDs: MAL5P1.314;PFE1600w	438	0	0.226764	0.371263	0.213805	0.0513211	0.579622	0.114823	24.4206	24.6636	24.3365	24.4916	24.7669	24.8037	23.9767	24.6695	24.5244	24.4475	24.4845	24.583
PF3D7_0532300	Plasmodium falciparum 3D7	Plasmodium exported protein (PHISTb), unknown function	N/A	Previous IDs: MAL5P1.314;PFE1600w	351	0	0.00753511	1.3057	1.27024	0.620236	0.0837595	0.0631119	24.1891	23.574	23.2467	25.2308	25.2483	24.3414	26.2728	26.082	26.2939	26.0885	26.3997	26.3498
PF3D7_0532300	Plasmodium falciparum 3D7	Plasmodium exported protein (PHISTb), unknown function	N/A	Previous IDs: MAL5P1.314;PFE1600w	463	0	0.0203105	0.998723	1.75673	NA	NA	NA	22.9534	24.6713	24.0608	26.0056	25.6746	25.2756	NA	NA	NA	NA	NA	NA
PF3D7_0532300	Plasmodium falciparum 3D7	Plasmodium exported protein (PHISTb), unknown function	N/A	Previous IDs: MAL5P1.314;PFE1600w	449	0	0.670428	0.101875	-0.392767	0.412929	0.143541	0.237177	25.1527	25.6549	25.3698	25.2687	25.4899	24.2405	24.8736	24.8399	24.4463	24.4773	24.9489	25.4452
PF3D7_0532300	Plasmodium falciparum 3D7	Plasmodium exported protein (PHISTb), unknown function	N/A	Previous IDs: MAL5P1.314;PFE1600w	463	1	NA	NA	NA	NA	NA	NA	NA	NA	NA	NA	NA	NA	NA	NA	NA	NA	NA	NA
PF3D7_0532300	Plasmodium falciparum 3D7	Plasmodium exported protein (PHISTb), unknown function	N/A	Previous IDs: MAL5P1.314;PFE1600w	332	0	0.775359	0.063778	0.25301	0.548469	0.0982876	-0.0889731	25.8282	25.339	25.7603	26.2643	25.8348	25.5874	25.0397	25.169	25.131	25.11	25.0558	24.907
PF3D7_0532300	Plasmodium falciparum 3D7	Plasmodium exported protein (PHISTb), unknown function	N/A	Previous IDs: MAL5P1.314;PFE1600w	335	0	0.599458	0.130746	0.135372	0.505116	0.1097	0.00953417	25.2666	24.8145	25.1695	25.486	25.1335	25.0373	24.3267	24.3879	24.4937	24.5576	24.4142	24.2652
PF3D7_0532300	Plasmodium falciparum 3D7	Plasmodium exported protein (PHISTb), unknown function	N/A	Previous IDs: MAL5P1.314;PFE1600w	171	0	NA	NA	NA	NA	NA	NA	NA	NA	NA	NA	NA	NA	NA	NA	NA	NA	NA	NA
PF3D7_0532300	Plasmodium falciparum 3D7	Plasmodium exported protein (PHISTb), unknown function	N/A	Previous IDs: MAL5P1.314;PFE1600w	466	0	0.927674	0.0227651	-0.0132622	0.47054	0.122358	0.107585	21.9778	21.7253	22.147	22.0563	21.8493	21.9047	23.4305	23.5584	23.7283	23.8738	23.6487	23.5175
PF3D7_0532300	Plasmodium falciparum 3D7	Plasmodium exported protein (PHISTb), unknown function	N/A	Previous IDs: MAL5P1.314;PFE1600w	441	0	0.280469	0.319364	0.169182	0.208063	0.265586	0.0218119	24.656	25.1081	24.386	24.7435	24.999	24.9151	24.0439	24.3699	24.0481	23.9056	24.1656	24.4561
PF3D7_0532400	Plasmodium falciparum 3D7	lysine-rich membrane-associated PHISTb protein	LyMP	Previous IDs: MAL5P1.315;PFE1605w	146	0	0.406275	0.228877	-0.133484	0.0407518	0.627579	0.4639	22.7793	24.2727	23.526	22.9398	23.8626	23.3751	22.3628	22.1391	22.5865	22.6678	22.9673	22.845
PF3D7_0532400	Plasmodium falciparum 3D7	lysine-rich membrane-associated PHISTb protein	LyMP	Previous IDs: MAL5P1.315;PFE1605w	260	0	0.211657	0.38863	-0.334732	NA	NA	NA	21.851	21.6536	22.0947	21.2557	21.8852	21.4542	NA	NA	NA	NA	NA	NA
PF3D7_0532400	Plasmodium falciparum 3D7	lysine-rich membrane-associated PHISTb protein	LyMP	Previous IDs: MAL5P1.315;PFE1605w	468	0	0.0153429	1.07243	0.122125	NA	NA	NA	20.4272	19.8564	20.5582	20.4901	20.3868	20.3312	NA	NA	NA	NA	NA	NA
PF3D7_0532400	Plasmodium falciparum 3D7	lysine-rich membrane-associated PHISTb protein	LyMP	Previous IDs: MAL5P1.315;PFE1605w	363	0	0.413909	0.226411	-0.187372	0.57157	0.0982876	0.148062	29.871	30.4741	29.8742	29.8615	29.821	29.9747	29.1097	28.8589	28.8293	28.6761	29.1183	29.4477
PF3D7_0532400	Plasmodium falciparum 3D7	lysine-rich membrane-associated PHISTb protein	LyMP	Previous IDs: MAL5P1.315;PFE1605w	136	0	0.426379	0.220068	0.413971	0.0407518	0.627579	0.4639	23.08	24.5473	23.8137	23.8348	24.3682	24.48	22.3628	22.1391	22.5865	22.6678	22.9673	22.845
PF3D7_0532400	Plasmodium falciparum 3D7	lysine-rich membrane-associated PHISTb protein	LyMP	Previous IDs: MAL5P1.315;PFE1605w	413	0	0.381094	0.24346	-0.188562	NA	NA	NA	21.3993	21.1757	21.76	21.3706	21.0828	21.316	NA	NA	NA	NA	NA	NA
PF3D7_0532400	Plasmodium falciparum 3D7	lysine-rich membrane-associated PHISTb protein	LyMP	Previous IDs: MAL5P1.315;PFE1605w	309	0	0.114991	0.54585	0.355468	0.0638629	0.524659	0.67904	23.6866	23.5946	23.6762	24.2176	24.1449	23.6613	20.9481	20.8347	20.7213	21.0625	21.9597	21.519
PF3D7_0532400	Plasmodium falciparum 3D7	lysine-rich membrane-associated PHISTb protein	LyMP	Previous IDs: MAL5P1.315;PFE1605w	433	0	0.385134	0.240596	0.650866	0.665801	0.0743748	-0.195955	23.4942	24.9349	25.1837	25.3291	25.5212	24.715	22.7435	23.3658	23.3907	22.9991	22.3268	23.5863
PF3D7_0532400	Plasmodium falciparum 3D7	lysine-rich membrane-associated PHISTb protein	LyMP	Previous IDs: MAL5P1.315;PFE1605w	465	0	0.0433522	0.795331	0.115852	NA	NA	NA	20.3789	19.808	20.553	20.3925	20.3326	20.3623	NA	NA	NA	NA	NA	NA
PF3D7_0532400	Plasmodium falciparum 3D7	lysine-rich membrane-associated PHISTb protein	LyMP	Previous IDs: MAL5P1.315;PFE1605w	414	0	0.403136	0.23168	0.193732	0.558696	0.0982876	-0.286163	23.8387	24.3362	24.3721	24.5797	24.3705	24.178	23.9388	24.6306	24.352	24.167	23.8238	24.0721
PF3D7_0532400	Plasmodium falciparum 3D7	lysine-rich membrane-associated PHISTb protein	LyMP	Previous IDs: MAL5P1.315;PFE1605w	440	0	0.441583	0.212039	0.0165211	0.319674	0.180176	0.271185	22.1407	21.8815	22.2353	22.0434	22.1171	22.1466	20.3365	20.9222	20.5986	20.6238	21.202	20.8451
PF3D7_0604500	Plasmodium falciparum 3D7	GYF domain-containing protein, putative	N/A	Previous IDs: 2270.t00268;MAL6P1.48;PFF0220w	2475	0	NA	NA	NA	NA	NA	NA	NA	NA	NA	NA	NA	NA	NA	NA	NA	NA	NA	NA
PF3D7_0702000	Plasmodium falciparum 3D7	Plasmodium exported protein (hyp12), unknown function	N/A	Previous IDs: MAL7P1.6	58	0	0.0329238	0.867795	-0.839752	NA	NA	NA	21.5166	21.0657	21.9675	20.6768	20.7351	20.6185	NA	NA	NA	NA	NA	NA
PF3D7_0702000	Plasmodium falciparum 3D7	Plasmodium exported protein (hyp12), unknown function	N/A	Previous IDs: MAL7P1.6	212	0	0.213382	0.386606	-0.294044	NA	NA	NA	22.6216	22.9192	22.7525	22.4471	22.5525	22.4116	NA	NA	NA	NA	NA	NA
PF3D7_0702400	Plasmodium falciparum 3D7	small exported membrane protein 1	SEMP1	Previous IDs: PF07_0007	23	0	4.23816e-06	3.66758	1.6712	4.89926e-05	2.33674	0.705124	21.6748	21.1818	21.4503	23.1789	23.2119	22.9297	22.1888	22.3924	22.3247	23.2195	22.3839	23.418
PF3D7_0702400	Plasmodium falciparum 3D7	small exported membrane protein 1	SEMP1	Previous IDs: PF07_0007	22	0	1.69411e-05	3.18579	1.91589	0.000150678	2.06456	1.12094	21.5871	21.3406	21.6825	23.5123	23.5738	23.2718	22.9523	23.2675	23.1552	24.0456	24.0507	24.6416
PF3D7_0702400	Plasmodium falciparum 3D7	small exported membrane protein 1	SEMP1	Previous IDs: PF07_0007	6	0	3.80855e-05	2.87673	2.08374	0.0456093	0.604608	1.05751	20.6884	20.3702	20.9362	22.9325	22.9538	22.3597	22.872	23.5102	23.215	24.0258	23.856	24.8879
PF3D7_0702500	Plasmodium falciparum 3D7	Plasmodium exported protein, unknown function	N/A	Previous IDs: PF07_0008	92	0	4.6807e-12	8.88408	2.23412	2.7167e-07	4.38871	0.899234	23.2257	22.7051	22.9217	25.3712	25.2158	24.9677	25.5162	25.4045	25.4123	26.3459	26.3454	26.3394
PF3D7_0702500	Plasmodium falciparum 3D7	Plasmodium exported protein, unknown function	N/A	Previous IDs: PF07_0008	102	0	3.51708e-12	8.88408	2.19071	6.84181e-08	4.44984	0.936868	23.7808	23.1856	23.4775	25.8329	25.7358	25.4474	26.1255	26.0533	26.0728	26.9742	27.0337	27.0543
PF3D7_0702500	Plasmodium falciparum 3D7	Plasmodium exported protein, unknown function	N/A	Previous IDs: PF07_0008	177	0	NA	NA	NA	NA	NA	NA	NA	NA	NA	NA	NA	NA	NA	NA	NA	NA	NA	NA
PF3D7_0702500	Plasmodium falciparum 3D7	Plasmodium exported protein, unknown function	N/A	Previous IDs: PF07_0008	69	0	0.00146645	1.74986	2.17666	0.0337168	0.677603	1.85826	20.3376	19.8637	20.8116	22.4156	22.613	22.5143	21.3217	22.626	21.9738	23.8321	23.0557	24.6085
PF3D7_0702500	Plasmodium falciparum 3D7	Plasmodium exported protein, unknown function	N/A	Previous IDs: PF07_0008	89	0	NA	NA	NA	NA	NA	NA	NA	NA	NA	NA	NA	NA	NA	NA	NA	NA	NA	NA
PF3D7_0702500	Plasmodium falciparum 3D7	Plasmodium exported protein, unknown function	N/A	Previous IDs: PF07_0008	227	0	0.00103019	1.85323	2.28323	0.225224	0.257472	1.82405	23.8282	23.4218	24.2347	26.011	26.3654	25.958	25.6792	22.2051	26.224	26.1651	26.5995	26.8158
PF3D7_0702500	Plasmodium falciparum 3D7	Plasmodium exported protein, unknown function	N/A	Previous IDs: PF07_0008	133	0	8.5973e-05	2.54945	3.81625	0.292567	0.196736	0.339445	19.005	18.4067	19.1038	22.4772	22.7039	22.7831	23.9547	23.253	23.2213	23.8738	23.5391	24.0345
PF3D7_0702500	Plasmodium falciparum 3D7	Plasmodium exported protein, unknown function	N/A	Previous IDs: PF07_0008	139	0	0.000101957	2.53498	1.52192	0.0149491	0.823795	0.951582	20.1566	20.4445	20.2032	21.7276	21.8685	21.7739	23.1399	22.7171	22.6071	23.7434	23.5006	24.0749
PF3D7_0702500	Plasmodium falciparum 3D7	Plasmodium exported protein, unknown function	N/A	Previous IDs: PF07_0008	90	0	3.49378e-07	4.41826	2.69603	0.00846727	0.990737	0.888565	21.0204	20.0478	20.4044	23.1761	23.3382	23.0464	23.7143	23.2694	23.209	24.1611	24.3618	24.3355
PF3D7_0702500	Plasmodium falciparum 3D7	Plasmodium exported protein, unknown function	N/A	Previous IDs: PF07_0008	227	1	0.00902502	1.24731	0.998688	9.38993e-05	2.21377	2.74452	24.4575	24.8253	25.1092	25.9021	25.8766	25.6093	22.7505	22.4156	22.0582	25.0294	25.2006	25.2279
PF3D7_0702500	Plasmodium falciparum 3D7	Plasmodium exported protein, unknown function	N/A	Previous IDs: PF07_0008	63	0	0.00118646	1.8176	2.14002	0.002183	1.38059	0.890229	21.4198	21.1956	21.644	23.7246	23.8408	23.1141	22.804	23.1931	23.0489	23.8559	24.0191	23.8418
PF3D7_0704600	Plasmodium falciparum 3D7	HECT-type E3 ubiquitin ligase UT	UT	Previous IDs: MAL7P1.19	3407	0	NA	NA	NA	NA	NA	NA	NA	NA	NA	NA	NA	NA	NA	NA	NA	NA	NA	NA
PF3D7_0704600	Plasmodium falciparum 3D7	HECT-type E3 ubiquitin ligase UT	UT	Previous IDs: MAL7P1.19	1602	0	0.801753	0.0572069	-0.123415	NA	NA	NA	21.7781	21.2579	21.518	21.2401	20.7307	22.213	NA	NA	NA	NA	NA	NA
PF3D7_0704600	Plasmodium falciparum 3D7	HECT-type E3 ubiquitin ligase UT	UT	Previous IDs: MAL7P1.19	3413	0	NA	NA	NA	NA	NA	NA	NA	NA	NA	NA	NA	NA	NA	NA	NA	NA	NA	NA
PF3D7_0705500	Plasmodium falciparum 3D7	inositol-phosphate phosphatase, putative	N/A	Previous IDs: PF07_0024	2071	0	NA	NA	NA	0.598046	0.0889866	0.209895	NA	NA	NA	NA	NA	NA	22.0909	22.2707	22.4191	21.9283	23.1373	22.3448
PF3D7_0705500	Plasmodium falciparum 3D7	inositol-phosphate phosphatase, putative	N/A	Previous IDs: PF07_0024	1887	0	NA	NA	NA	0.508454	0.109089	-0.250674	NA	NA	NA	NA	NA	NA	20.8764	20.823	20.7732	21.1699	20.5735	19.9771
PF3D7_0705500	Plasmodium falciparum 3D7	inositol-phosphate phosphatase, putative	N/A	Previous IDs: PF07_0024	2123	0	NA	NA	NA	0.00328545	1.23044	0.414322	NA	NA	NA	NA	NA	NA	21.6468	21.6215	21.7773	22.0078	22.1255	22.1552
PF3D7_0705500	Plasmodium falciparum 3D7	inositol-phosphate phosphatase, putative	N/A	Previous IDs: PF07_0024	2181	0	NA	NA	NA	0.234382	0.247661	-0.242273	NA	NA	NA	NA	NA	NA	22.8658	23.2053	23.3486	22.8976	23.0664	22.7289
PF3D7_0705500	Plasmodium falciparum 3D7	inositol-phosphate phosphatase, putative	N/A	Previous IDs: PF07_0024	2337	0	NA	NA	NA	NA	NA	NA	NA	NA	NA	NA	NA	NA	NA	NA	NA	NA	NA	NA
PF3D7_0705500	Plasmodium falciparum 3D7	inositol-phosphate phosphatase, putative	N/A	Previous IDs: PF07_0024	1766	0	NA	NA	NA	0.57118	0.0982876	-0.139434	NA	NA	NA	NA	NA	NA	22.5581	22.8476	22.5961	22.1687	22.5278	22.8869
PF3D7_0705500	Plasmodium falciparum 3D7	inositol-phosphate phosphatase, putative	N/A	Previous IDs: PF07_0024	2725	0	NA	NA	NA	0.862496	0.0256135	0.0733566	NA	NA	NA	NA	NA	NA	21.4239	21.3519	21.4288	21.4347	21.5192	21.4708
PF3D7_0705500	Plasmodium falciparum 3D7	inositol-phosphate phosphatase, putative	N/A	Previous IDs: PF07_0024	1769	0	0.657988	0.10863	0.0635011	0.30208	0.193288	-0.187538	22.681	22.4335	22.721	22.799	22.4818	22.7453	24.0913	24.3549	24.5374	24.2482	24.214	23.9587
PF3D7_0705500	Plasmodium falciparum 3D7	inositol-phosphate phosphatase, putative	N/A	Previous IDs: PF07_0024	1997	0	NA	NA	NA	0.388087	0.153686	0.411059	NA	NA	NA	NA	NA	NA	19.3191	20.0501	20.6307	20.0799	20.411	20.7422
PF3D7_0705500	Plasmodium falciparum 3D7	inositol-phosphate phosphatase, putative	N/A	Previous IDs: PF07_0024	2620	0	NA	NA	NA	NA	NA	NA	NA	NA	NA	NA	NA	NA	NA	NA	NA	NA	NA	NA
PF3D7_0705500	Plasmodium falciparum 3D7	inositol-phosphate phosphatase, putative	N/A	Previous IDs: PF07_0024	1778	0	0.687881	0.0939154	0.202671	0.238204	0.242378	-0.236375	19.8498	21.1454	20.4721	21.1494	20.7506	20.1752	22.9684	22.7342	22.6422	22.2657	22.7061	22.6639
PF3D7_0708400	Plasmodium falciparum 3D7	heat shock protein 90	HSP90	Previous IDs: PF07_0029	634	0	NA	NA	NA	0.639586	0.081011	0.0749621	NA	NA	NA	NA	NA	NA	20.2705	20.3046	20.2364	20.5999	20.3455	20.0911
PF3D7_0716000	Plasmodium falciparum 3D7	RNA-binding protein, putative	N/A	Previous IDs: PF07_0066	617	0	NA	NA	NA	NA	NA	NA	NA	NA	NA	NA	NA	NA	NA	NA	NA	NA	NA	NA
PF3D7_0716300	Plasmodium falciparum 3D7	conserved protein, unknown function	N/A	Previous IDs: MAL7P1.77	52	0	NA	NA	NA	NA	NA	NA	NA	NA	NA	NA	NA	NA	NA	NA	NA	NA	NA	NA
PF3D7_0716300	Plasmodium falciparum 3D7	conserved protein, unknown function	N/A	Previous IDs: MAL7P1.77	55	0	NA	NA	NA	NA	NA	NA	NA	NA	NA	NA	NA	NA	NA	NA	NA	NA	NA	NA
PF3D7_0721100	Plasmodium falciparum 3D7	conserved protein, unknown function	N/A	Previous IDs: PF07_0087	199	0	0.802091	0.0572069	-0.0844389	NA	NA	NA	23.8121	24.4984	23.4727	23.7169	23.7916	24.0214	NA	NA	NA	NA	NA	NA
PF3D7_0721100	Plasmodium falciparum 3D7	conserved protein, unknown function	N/A	Previous IDs: PF07_0087	88	0	0.616292	0.124919	-0.0798922	NA	NA	NA	20.513	20.788	20.538	20.3091	20.7107	20.5794	NA	NA	NA	NA	NA	NA
PF3D7_0725000	Plasmodium falciparum 3D7	exonuclease I, putative	N/A	Previous IDs: PF07_0105	1048	1	NA	NA	NA	NA	NA	NA	NA	NA	NA	NA	NA	NA	NA	NA	NA	NA	NA	NA
PF3D7_0725000	Plasmodium falciparum 3D7	exonuclease I, putative	N/A	Previous IDs: PF07_0105	1052	1	NA	NA	NA	NA	NA	NA	NA	NA	NA	NA	NA	NA	NA	NA	NA	NA	NA	NA
PF3D7_0725000	Plasmodium falciparum 3D7	exonuclease I, putative	N/A	Previous IDs: PF07_0105	1057	1	NA	NA	NA	NA	NA	NA	NA	NA	NA	NA	NA	NA	NA	NA	NA	NA	NA	NA
PF3D7_0726100	Plasmodium falciparum 3D7	Plasmodium exported protein, unknown function	N/A	Previous IDs: PF07_0107	128	0	NA	NA	NA	0.0211614	0.793874	-0.876315	NA	NA	NA	NA	NA	NA	21.3882	21.9764	21.9497	20.6511	21.1392	20.8952
PF3D7_0726100	Plasmodium falciparum 3D7	Plasmodium exported protein, unknown function	N/A	Previous IDs: PF07_0107	134	0	NA	NA	NA	0.0211614	0.793874	-0.876315	NA	NA	NA	NA	NA	NA	21.3882	21.9764	21.9497	20.6511	21.1392	20.8952
PF3D7_0726100	Plasmodium falciparum 3D7	Plasmodium exported protein, unknown function	N/A	Previous IDs: PF07_0107	206	0	NA	NA	NA	NA	NA	NA	NA	NA	NA	NA	NA	NA	NA	NA	NA	NA	NA	NA
PF3D7_0729900	Plasmodium falciparum 3D7	dynein heavy chain, putative	N/A	Previous IDs: MAL7P1.162	1339	1	0.789952	0.0610396	0.0891044	NA	NA	NA	20.5548	21.3773	21.5418	21.3294	21.1111	21.3007	NA	NA	NA	NA	NA	NA
PF3D7_0729900	Plasmodium falciparum 3D7	dynein heavy chain, putative	N/A	Previous IDs: MAL7P1.162	3562	0	NA	NA	NA	NA	NA	NA	NA	NA	NA	NA	NA	NA	NA	NA	NA	NA	NA	NA
PF3D7_0730800	Plasmodium falciparum 3D7	Plasmodium exported protein, unknown function	N/A	Previous IDs: MAL7P1.170;PF3D7_0730800.1;PF3D7_0730800.2	144	0	0.564055	0.147958	0.353722	NA	NA	NA	23.2899	23.2715	21.9091	23.1868	23.2293	23.1156	NA	NA	NA	NA	NA	NA
PF3D7_0730800	Plasmodium falciparum 3D7	Plasmodium exported protein, unknown function	N/A	Previous IDs: MAL7P1.170;PF3D7_0730800.1;PF3D7_0730800.2	148	0	0.535382	0.164519	0.369474	NA	NA	NA	22.7492	22.5539	21.0409	22.5032	22.6098	22.3393	NA	NA	NA	NA	NA	NA
PF3D7_0730800	Plasmodium falciparum 3D7	Plasmodium exported protein, unknown function	N/A	Previous IDs: MAL7P1.170;PF3D7_0730800.1;PF3D7_0730800.2	116	0	NA	NA	NA	NA	NA	NA	NA	NA	NA	NA	NA	NA	NA	NA	NA	NA	NA	NA
PF3D7_0730800	Plasmodium falciparum 3D7	Plasmodium exported protein, unknown function	N/A	Previous IDs: MAL7P1.170;PF3D7_0730800.1;PF3D7_0730800.2	167	0	0.674635	0.10099	-0.393932	NA	NA	NA	23.2949	23.9351	21.5088	21.6353	22.6277	23.2939	NA	NA	NA	NA	NA	NA
PF3D7_0730800	Plasmodium falciparum 3D7	Plasmodium exported protein, unknown function	N/A	Previous IDs: MAL7P1.170;PF3D7_0730800.1;PF3D7_0730800.2	194	0	0.52728	0.164519	0.191618	0.00178598	1.4151	0.678725	24.7116	25.0024	24.2456	25.1567	24.581	24.7968	22.2923	22.1824	22.4388	22.8764	23.0234	23.0499
PF3D7_0730800	Plasmodium falciparum 3D7	Plasmodium exported protein, unknown function	N/A	Previous IDs: MAL7P1.170;PF3D7_0730800.1;PF3D7_0730800.2	175	0	0.533186	0.164519	-0.181674	0.306318	0.191493	-0.990832	22.8357	23.1659	22.777	22.7517	22.5874	22.8946	22.6152	22.4329	22.2506	19.7684	22.1748	22.383
PF3D7_0730800	Plasmodium falciparum 3D7	Plasmodium exported protein, unknown function	N/A	Previous IDs: MAL7P1.170;PF3D7_0730800.1;PF3D7_0730800.2	161	0	0.674635	0.10099	-0.393932	NA	NA	NA	23.2949	23.9351	21.5088	21.6353	22.6277	23.2939	NA	NA	NA	NA	NA	NA
PF3D7_0730800	Plasmodium falciparum 3D7	Plasmodium exported protein, unknown function	N/A	Previous IDs: MAL7P1.170;PF3D7_0730800.1;PF3D7_0730800.2	101	0	0.244864	0.354101	0.127618	0.371297	0.158851	-0.0957647	28.3878	28.1019	28.3764	28.418	28.4271	28.404	25.9924	26.0282	26.1846	25.9665	26.105	25.8465
PF3D7_0730800	Plasmodium falciparum 3D7	Plasmodium exported protein, unknown function	N/A	Previous IDs: MAL7P1.170;PF3D7_0730800.1;PF3D7_0730800.2	130	0	0.424573	0.220068	0.337971	NA	NA	NA	23.8305	23.9892	22.7773	23.8703	23.8488	23.8918	NA	NA	NA	NA	NA	NA
PF3D7_0730800	Plasmodium falciparum 3D7	Plasmodium exported protein, unknown function	N/A	Previous IDs: MAL7P1.170;PF3D7_0730800.1;PF3D7_0730800.2	171	0	0.864442	0.0417081	-0.227946	NA	NA	NA	22.0966	22.445	21.2602	21.4422	21.5822	22.0935	NA	NA	NA	NA	NA	NA
PF3D7_0730800	Plasmodium falciparum 3D7	Plasmodium exported protein, unknown function	N/A	Previous IDs: MAL7P1.170;PF3D7_0730800.1;PF3D7_0730800.2	197	0	0.00739348	1.31137	-0.283194	0.00691566	1.03214	0.435314	23.8657	24.046	23.5979	23.6191	23.4442	23.5967	22.0332	21.952	21.8157	22.2415	22.5515	22.3138
PF3D7_0730800	Plasmodium falciparum 3D7	Plasmodium exported protein, unknown function	N/A	Previous IDs: MAL7P1.170;PF3D7_0730800.1;PF3D7_0730800.2	137	0	0.535382	0.164519	0.369474	NA	NA	NA	22.7492	22.5539	21.0409	22.5032	22.6098	22.3393	NA	NA	NA	NA	NA	NA
PF3D7_0730800	Plasmodium falciparum 3D7	Plasmodium exported protein, unknown function	N/A	Previous IDs: MAL7P1.170;PF3D7_0730800.1;PF3D7_0730800.2	107	0	0.585942	0.136789	0.177548	0.179146	0.287215	-0.227745	24.089	24.7646	23.8907	24.7092	24.2877	24.28	22.0599	21.953	22.2929	21.7606	22.0685	21.7933
PF3D7_0730900	Plasmodium falciparum 3D7	EMP1-trafficking protein	PTP4	Previous IDs: MAL7P1.171	1844	0	0.00438132	1.46909	-0.547902	0.261759	0.216425	-0.524961	21.8998	21.8941	21.7981	21.3877	21.2317	21.3289	24.7891	24.7973	24.6847	24.636	23.9034	24.1568
PF3D7_0730900	Plasmodium falciparum 3D7	EMP1-trafficking protein	PTP4	Previous IDs: MAL7P1.171	1928	0	NA	NA	NA	0.44807	0.132123	0.373419	NA	NA	NA	NA	NA	NA	22.5264	23.3624	23.0062	23.0576	23.2709	23.6868
PF3D7_0730900	Plasmodium falciparum 3D7	EMP1-trafficking protein	PTP4	Previous IDs: MAL7P1.171	1993	1	NA	NA	NA	0.0210514	0.793874	-1.71545	NA	NA	NA	NA	NA	NA	20.4814	20.8993	20.2589	17.9972	19.3958	19.1001
PF3D7_0730900	Plasmodium falciparum 3D7	EMP1-trafficking protein	PTP4	Previous IDs: MAL7P1.171	2050	0	2.29353e-06	3.91405	1.01778	0.187289	0.282634	0.255587	21.7466	22.1135	22.2917	23.1578	23.0451	23.0023	24.9059	25.3249	24.7856	25.1213	25.1658	25.496
PF3D7_0730900	Plasmodium falciparum 3D7	EMP1-trafficking protein	PTP4	Previous IDs: MAL7P1.171	1016	0	0.44961	0.207448	-0.00363556	0.462071	0.12839	0.0771907	25.1266	24.9957	25.1074	25.355	25.0382	24.8256	24.7644	24.8751	24.9015	24.9331	25.0233	24.8162
PF3D7_0730900	Plasmodium falciparum 3D7	EMP1-trafficking protein	PTP4	Previous IDs: MAL7P1.171	1287	0	0.708437	0.0879099	0.226391	0.449624	0.132123	-0.201172	24.4357	25.2188	25.4194	25.1637	25.3526	25.2368	26.1074	26.6156	26.7527	26.4315	26.1294	26.3113
PF3D7_0730900	Plasmodium falciparum 3D7	EMP1-trafficking protein	PTP4	Previous IDs: MAL7P1.171	1962	0	2.29353e-06	3.91405	1.01778	0.187289	0.282634	0.255587	21.7466	22.1135	22.2917	23.1578	23.0451	23.0023	24.9059	25.3249	24.7856	25.1213	25.1658	25.496
PF3D7_0730900	Plasmodium falciparum 3D7	EMP1-trafficking protein	PTP4	Previous IDs: MAL7P1.171	1971	0	0.00144989	1.75004	1.37127	0.505034	0.1097	0.328167	20.2872	20.8275	20.9472	22.3622	22.1266	21.687	25.4757	25.2766	26.0174	26.1653	26.0903	25.4985
PF3D7_0730900	Plasmodium falciparum 3D7	EMP1-trafficking protein	PTP4	Previous IDs: MAL7P1.171	459	0	0.0570526	0.732001	-0.106087	0.758262	0.0555379	0.0260719	23.4007	23.514	23.0324	23.0233	23.2343	23.3713	24.3142	23.9154	23.6927	23.9934	24.0185	23.9886
PF3D7_0730900	Plasmodium falciparum 3D7	EMP1-trafficking protein	PTP4	Previous IDs: MAL7P1.171	466	0	0.718938	0.0842036	0.0955128	0.881081	0.0232436	-0.0765214	23.1111	23.7155	23.7291	23.1729	23.6417	24.0277	24.3423	24.0736	23.9947	23.9947	24.1629	24.0234
PF3D7_0730900	Plasmodium falciparum 3D7	EMP1-trafficking protein	PTP4	Previous IDs: MAL7P1.171	1260	0	0.0700767	0.669106	-0.478407	0.682231	0.0743748	-0.245963	24.8235	24.93	24.7163	24.3772	24.1436	24.5138	25.6407	25.3747	25.3943	25.3876	25.0387	25.2455
PF3D7_0730900	Plasmodium falciparum 3D7	EMP1-trafficking protein	PTP4	Previous IDs: MAL7P1.171	1070	0	NA	NA	NA	0.7516	0.0566814	-0.0910947	NA	NA	NA	NA	NA	NA	20.3028	20.6367	20.096	19.8382	20.3508	20.5732
PF3D7_0730900	Plasmodium falciparum 3D7	EMP1-trafficking protein	PTP4	Previous IDs: MAL7P1.171	739	0	0.195865	0.414728	0.0759378	0.416748	0.143395	-0.0790156	27.0071	27.1222	26.6667	26.8929	27.0921	27.0389	29.5792	29.539	29.5997	29.3671	29.5626	29.5511
PF3D7_0730900	Plasmodium falciparum 3D7	EMP1-trafficking protein	PTP4	Previous IDs: MAL7P1.171	1931	0	0.495916	0.180961	0.167758	0.682287	0.0743748	0.333259	20.3116	19.9987	20.7105	20.4422	20.3985	20.6833	22.8257	23.6666	23.2509	23.1402	23.6115	23.9913
PF3D7_0730900	Plasmodium falciparum 3D7	EMP1-trafficking protein	PTP4	Previous IDs: MAL7P1.171	1104	0	0.249863	0.347726	-0.107416	0.542993	0.0982876	0.108462	24.2883	24.2027	24.1903	24.1339	24.2396	23.9855	27.1571	26.9544	26.7569	26.8559	27.0834	27.2545
PF3D7_0730900	Plasmodium falciparum 3D7	EMP1-trafficking protein	PTP4	Previous IDs: MAL7P1.171	591	0	0.226772	0.371263	-0.396674	0.873378	0.0243094	-0.0106711	22.8386	22.8293	22.2893	22.3234	22.0088	22.4351	25.1881	24.6045	24.6945	24.7399	24.7982	24.9169
PF3D7_0730900	Plasmodium falciparum 3D7	EMP1-trafficking protein	PTP4	Previous IDs: MAL7P1.171	1615	0	0.0063557	1.35869	0.82901	0.65459	0.0803184	-0.716056	21.7977	21.4796	21.7589	22.295	22.6167	22.6115	24.2635	25.4315	25.3342	25.0828	22.578	25.2201
PF3D7_0730900	Plasmodium falciparum 3D7	EMP1-trafficking protein	PTP4	Previous IDs: MAL7P1.171	1418	0	0.00435518	1.46909	0.593303	0.964126	0.00594325	0.00674972	22.1832	21.7615	22.1457	22.7878	22.4529	22.6296	24.7268	24.8741	25.1116	24.9668	24.8726	24.8933
PF3D7_0730900	Plasmodium falciparum 3D7	EMP1-trafficking protein	PTP4	Previous IDs: MAL7P1.171	1449	0	0.532476	0.164519	-0.172887	0.214672	0.263299	-0.300686	23.903	24.3333	23.7788	23.5483	24.2942	23.6538	25.702	25.5152	25.7626	25.7144	24.9942	25.369
PF3D7_0730900	Plasmodium falciparum 3D7	EMP1-trafficking protein	PTP4	Previous IDs: MAL7P1.171	1832	0	0.00555114	1.40385	-0.935892	0.582518	0.0948694	0.277613	21.7202	22.0096	21.7219	20.6398	20.8703	21.1339	23.416	23.346	22.9146	23.5046	23.5769	23.4279
PF3D7_0730900	Plasmodium falciparum 3D7	EMP1-trafficking protein	PTP4	Previous IDs: MAL7P1.171	1918	0	0.0141088	1.09731	0.960978	0.109373	0.388068	0.279986	19.0683	19.2821	20.0109	20.4191	20.3781	20.4471	23.1324	23.7579	23.2018	23.4249	23.646	23.8612
PF3D7_0730900	Plasmodium falciparum 3D7	EMP1-trafficking protein	PTP4	Previous IDs: MAL7P1.171	1784	0	NA	NA	NA	0.743717	0.0592323	0.0881153	NA	NA	NA	NA	NA	NA	23.3887	22.5828	22.7155	22.9879	23.0365	22.927
PF3D7_0730900	Plasmodium falciparum 3D7	EMP1-trafficking protein	PTP4	Previous IDs: MAL7P1.171	1786	0	NA	NA	NA	NA	NA	NA	NA	NA	NA	NA	NA	NA	NA	NA	NA	NA	NA	NA
PF3D7_0730900	Plasmodium falciparum 3D7	EMP1-trafficking protein	PTP4	Previous IDs: MAL7P1.171	1953	0	2.06766e-07	4.5911	0.993673	0.423561	0.140319	0.237101	22.51	22.6306	22.6422	23.6306	23.607	23.5262	25.8866	26.3312	25.6824	26.0908	26.0532	26.4674
PF3D7_0730900	Plasmodium falciparum 3D7	EMP1-trafficking protein	PTP4	Previous IDs: MAL7P1.171	884	0	0.0111658	1.18091	0.359914	0.0598389	0.542698	-0.0644006	23.9224	24.714	24.2559	24.7413	24.6831	24.5476	26.3344	25.9889	26.2806	26.0999	26.1973	26.1135
PF3D7_0730900	Plasmodium falciparum 3D7	EMP1-trafficking protein	PTP4	Previous IDs: MAL7P1.171	760	0	0.0266579	0.936521	0.186821	0.167404	0.300197	-0.159583	23.8505	23.9954	23.826	24.0951	24.1923	23.9449	25.4981	25.5164	25.6288	25.2167	25.474	25.4739
PF3D7_0730900	Plasmodium falciparum 3D7	EMP1-trafficking protein	PTP4	Previous IDs: MAL7P1.171	1568	0	0.166211	0.452662	-0.279603	0.276498	0.209201	0.0516796	23.1078	23.0676	23.1001	22.9464	22.5675	22.9228	24.7513	24.744	24.8709	24.8585	24.7278	24.9349
PF3D7_0730900	Plasmodium falciparum 3D7	EMP1-trafficking protein	PTP4	Previous IDs: MAL7P1.171	1849	0	0.0142792	1.0943	-0.324192	0.204975	0.265586	-0.379962	21.8122	22.0965	21.8884	21.5866	21.5316	21.7063	25.1952	25.2323	25.1735	25.155	24.5817	24.7244
PF3D7_0730900	Plasmodium falciparum 3D7	EMP1-trafficking protein	PTP4	Previous IDs: MAL7P1.171	1997	1	NA	NA	NA	0.0210514	0.793874	-1.71545	NA	NA	NA	NA	NA	NA	20.4814	20.8993	20.2589	17.9972	19.3958	19.1001
PF3D7_0730900	Plasmodium falciparum 3D7	EMP1-trafficking protein	PTP4	Previous IDs: MAL7P1.171	1827	0	NA	NA	NA	0.790277	0.0429067	0.159582	NA	NA	NA	NA	NA	NA	21.8757	22.6284	22.3978	22.4274	22.0771	22.8761
PF3D7_0730900	Plasmodium falciparum 3D7	EMP1-trafficking protein	PTP4	Previous IDs: MAL7P1.171	1779	0	0.102119	0.569169	-0.654516	0.669898	0.0743748	0.0342653	20.1812	20.1269	20.2991	19.3024	19.1861	20.1552	24.9012	25.0418	24.796	24.922	24.9916	24.9282
PF3D7_0730900	Plasmodium falciparum 3D7	EMP1-trafficking protein	PTP4	Previous IDs: MAL7P1.171	1327	0	0.0155476	1.07243	0.727963	0.65459	0.0803184	-0.716056	22.215	21.7822	22.1274	22.8016	22.6335	22.8733	24.2635	25.4315	25.3342	25.0828	22.578	25.2201
PF3D7_0730900	Plasmodium falciparum 3D7	EMP1-trafficking protein	PTP4	Previous IDs: MAL7P1.171	1808	0	NA	NA	NA	0.838754	0.0332944	0.200945	NA	NA	NA	NA	NA	NA	22.3099	21.0568	21.862	22.3661	21.847	21.6183
PF3D7_0730900	Plasmodium falciparum 3D7	EMP1-trafficking protein	PTP4	Previous IDs: MAL7P1.171	2037	0	4.44648e-07	4.41826	1.01206	0.569643	0.0982876	0.393067	22.4644	22.2349	22.1229	23.3293	23.3136	23.2154	25.8357	25.9407	26.0089	26.2508	26.1899	26.5239
PF3D7_0730900	Plasmodium falciparum 3D7	EMP1-trafficking protein	PTP4	Previous IDs: MAL7P1.171	2037	1	NA	NA	NA	0.0210514	0.793874	-1.71545	NA	NA	NA	NA	NA	NA	20.4814	20.8993	20.2589	17.9972	19.3958	19.1001
PF3D7_0730900	Plasmodium falciparum 3D7	EMP1-trafficking protein	PTP4	Previous IDs: MAL7P1.171	1268	0	0.0470074	0.78727	-0.413393	0.975385	0.00594325	-0.14616	24.3656	24.3615	24.2541	24.0802	23.6371	24.0237	25.5406	25.4481	25.2546	25.3031	25.236	25.2658
PF3D7_0730900	Plasmodium falciparum 3D7	EMP1-trafficking protein	PTP4	Previous IDs: MAL7P1.171	541	0	0.000875645	1.90763	-1.99583	0.547646	0.0982876	-0.37919	23.6037	23.9442	23.2633	21.6079	21.4222	21.7936	26.1152	25.7522	25.3861	25.4748	25.1287	25.5126
PF3D7_0730900	Plasmodium falciparum 3D7	EMP1-trafficking protein	PTP4	Previous IDs: MAL7P1.171	1317	0	0.191122	0.417512	-0.231616	0.218708	0.262465	0.177742	23.582	23.3269	23.7844	23.4385	23.2149	23.3451	24.1631	24.2452	24.3618	24.6133	24.2744	24.4156
PF3D7_0730900	Plasmodium falciparum 3D7	EMP1-trafficking protein	PTP4	Previous IDs: MAL7P1.171	1082	0	NA	NA	NA	0.833303	0.033568	-0.187358	NA	NA	NA	NA	NA	NA	22.1143	22.1346	21.4873	21.6025	21.3319	22.2396
PF3D7_0730900	Plasmodium falciparum 3D7	EMP1-trafficking protein	PTP4	Previous IDs: MAL7P1.171	437	0	0.202858	0.403298	-0.487664	0.723075	0.0614027	0.123584	24.4813	24.7279	24.2347	24.1223	23.4444	24.4141	25.8346	25.1276	25.0221	25.2051	25.6507	25.4993
PF3D7_0730900	Plasmodium falciparum 3D7	EMP1-trafficking protein	PTP4	Previous IDs: MAL7P1.171	298	0	0.179408	0.43169	0.237948	0.27933	0.207168	-0.159146	21.5397	21.5329	21.607	21.9188	21.7929	21.6817	22.9981	23.4356	22.9563	23.0177	22.8173	23.0775
PF3D7_0730900	Plasmodium falciparum 3D7	EMP1-trafficking protein	PTP4	Previous IDs: MAL7P1.171	576	0	0.228938	0.369706	0.138134	0.0835434	0.454723	-0.209642	24.5982	24.6957	24.6741	24.8732	24.9	24.6093	24.0066	23.8188	23.7463	23.5505	23.6994	23.693
PF3D7_0730900	Plasmodium falciparum 3D7	EMP1-trafficking protein	PTP4	Previous IDs: MAL7P1.171	1502	0	0.0530491	0.752993	-0.533192	0.275126	0.209201	0.262839	21.4547	21.6378	21.5841	20.6975	21.3502	21.0293	22.1643	22.2549	22.3599	22.3729	22.4336	22.761
PF3D7_0730900	Plasmodium falciparum 3D7	EMP1-trafficking protein	PTP4	Previous IDs: MAL7P1.171	1304	0	0.000738893	1.97585	-0.0810339	0.790153	0.0429067	-0.146578	25.8226	25.691	25.8188	25.7828	25.7123	25.5942	25.5796	24.9831	24.6643	25.1853	24.5862	25.0159
PF3D7_0730900	Plasmodium falciparum 3D7	EMP1-trafficking protein	PTP4	Previous IDs: MAL7P1.171	1208	0	0.000738893	1.97585	-0.0810339	0.790153	0.0429067	-0.146578	25.8226	25.691	25.8188	25.7828	25.7123	25.5942	25.5796	24.9831	24.6643	25.1853	24.5862	25.0159
PF3D7_0730900	Plasmodium falciparum 3D7	EMP1-trafficking protein	PTP4	Previous IDs: MAL7P1.171	1161	0	0.532476	0.164519	-0.172887	0.214672	0.263299	-0.300686	23.903	24.3333	23.7788	23.5483	24.2942	23.6538	25.702	25.5152	25.7626	25.7144	24.9942	25.369
PF3D7_0730900	Plasmodium falciparum 3D7	EMP1-trafficking protein	PTP4	Previous IDs: MAL7P1.171	168	0	0.807153	0.0556801	0.0153924	0.574517	0.0982876	0.0422834	23.4441	23.2424	23.3637	23.5282	23.3349	23.2332	24.4063	24.3019	24.6403	24.3998	24.6282	24.4474
PF3D7_0730900	Plasmodium falciparum 3D7	EMP1-trafficking protein	PTP4	Previous IDs: MAL7P1.171	1605	0	0.0830412	0.626328	-0.682974	0.455019	0.132123	0.0677875	21.3497	21.669	21.5611	20.4526	21.4143	20.6639	24.3842	24.6276	24.2573	24.633	24.377	24.4626
PF3D7_0730900	Plasmodium falciparum 3D7	EMP1-trafficking protein	PTP4	Previous IDs: MAL7P1.171	738	0	0.288156	0.3176	0.232708	0.362688	0.165221	-0.131669	25.8294	26.0866	25.4763	25.9218	26.1964	25.9723	28.5593	28.4952	28.5464	28.199	28.4709	28.5361
PF3D7_0730900	Plasmodium falciparum 3D7	EMP1-trafficking protein	PTP4	Previous IDs: MAL7P1.171	283	0	0.186326	0.423605	-0.154431	0.0109893	0.921659	0.0846212	20.6133	20.4128	20.7553	20.5527	20.3669	20.3985	22.4755	22.6735	22.3997	22.5337	22.6245	22.6444
PF3D7_0730900	Plasmodium falciparum 3D7	EMP1-trafficking protein	PTP4	Previous IDs: MAL7P1.171	1693	0	0.550813	0.154826	-0.124967	0.182169	0.284912	-0.0697127	23.3625	23.4286	23.5645	23.3794	23.3558	23.2457	25.5183	25.2033	25.1723	25.6644	25.0581	24.9623
PF3D7_0730900	Plasmodium falciparum 3D7	EMP1-trafficking protein	PTP4	Previous IDs: MAL7P1.171	1221	0	0.191122	0.417512	-0.231616	0.218708	0.262465	0.177742	23.582	23.3269	23.7844	23.4385	23.2149	23.3451	24.1631	24.2452	24.3618	24.6133	24.2744	24.4156
PF3D7_0730900	Plasmodium falciparum 3D7	EMP1-trafficking protein	PTP4	Previous IDs: MAL7P1.171	343	0	0.000335073	2.16756	-0.492696	0.134653	0.333024	-0.140455	22.9394	23.0023	22.9004	22.4174	22.4298	22.5168	24.7384	24.7962	24.6082	24.4565	24.5224	24.7425
PF3D7_0730900	Plasmodium falciparum 3D7	EMP1-trafficking protein	PTP4	Previous IDs: MAL7P1.171	642	0	0.000534169	2.02672	0.0311744	0.358707	0.165221	0.0244769	23.1477	23.0613	23.078	23.2638	23.1833	22.9334	25.2753	25.0349	25.0547	25.2208	25.1458	25.0718
PF3D7_0730900	Plasmodium falciparum 3D7	EMP1-trafficking protein	PTP4	Previous IDs: MAL7P1.171	848	0	0.0254028	0.953071	0.207912	0.118237	0.369777	-0.11883	25.4939	25.6856	25.3441	25.7089	25.7698	25.6686	29.2902	29.2481	29.3126	29.0684	29.1787	29.2474
PF3D7_0730900	Plasmodium falciparum 3D7	EMP1-trafficking protein	PTP4	Previous IDs: MAL7P1.171	287	0	0.827025	0.0489172	0.152367	9.75426e-05	2.21377	0.125617	20.6886	20.6529	21.1589	21.1558	20.8704	20.9314	22.9077	23.0454	22.7277	22.975	22.9596	23.123
PF3D7_0730900	Plasmodium falciparum 3D7	EMP1-trafficking protein	PTP4	Previous IDs: MAL7P1.171	1472	0	0.166211	0.452662	-0.279603	0.388172	0.153686	-0.0885474	23.1078	23.0676	23.1001	22.9464	22.5675	22.9228	25.073	25.2372	25.2112	25.1853	24.9169	25.1535
PF3D7_0730900	Plasmodium falciparum 3D7	EMP1-trafficking protein	PTP4	Previous IDs: MAL7P1.171	585	0	0.368347	0.245869	0.0122961	0.173202	0.29853	-0.183553	23.2571	23.5077	23.3266	23.4567	23.3334	23.3381	24.6647	24.3829	24.4571	24.2534	24.3594	24.3412
PF3D7_0730900	Plasmodium falciparum 3D7	EMP1-trafficking protein	PTP4	Previous IDs: MAL7P1.171	365	0	NA	NA	NA	0.50893	0.109089	0.0903069	NA	NA	NA	NA	NA	NA	24.6091	24.5235	24.674	25.1728	24.2046	24.7
PF3D7_0730900	Plasmodium falciparum 3D7	EMP1-trafficking protein	PTP4	Previous IDs: MAL7P1.171	2008	0	1.03219e-06	4.16902	0.933995	0.32759	0.178994	0.144851	21.6814	22.1623	22.2437	23.0523	22.9876	22.8494	25.75	26.1522	25.6053	25.9282	25.8812	26.1325
PF3D7_0730900	Plasmodium falciparum 3D7	EMP1-trafficking protein	PTP4	Previous IDs: MAL7P1.171	1865	0	0.0125925	1.14003	-0.539548	0.624841	0.0815958	-0.0346242	21.2147	21.5145	21.3573	20.5728	20.6886	21.2063	24.6972	24.7732	24.3613	24.5912	24.3202	24.8166
PF3D7_0730900	Plasmodium falciparum 3D7	EMP1-trafficking protein	PTP4	Previous IDs: MAL7P1.171	1053	0	NA	NA	NA	0.124498	0.357001	-0.510319	NA	NA	NA	NA	NA	NA	22.2362	21.8565	21.4767	21.094	21.3461	21.5982
PF3D7_0730900	Plasmodium falciparum 3D7	EMP1-trafficking protein	PTP4	Previous IDs: MAL7P1.171	2091	1	NA	NA	NA	0.344817	0.167842	-0.60436	NA	NA	NA	NA	NA	NA	19.2092	19.728	18.8037	19.3714	18.8645	17.6919
PF3D7_0730900	Plasmodium falciparum 3D7	EMP1-trafficking protein	PTP4	Previous IDs: MAL7P1.171	2019	0	NA	NA	NA	0.631099	0.081011	0.0863629	NA	NA	NA	NA	NA	NA	23.5519	24.0553	24.0309	24.1762	24.1196	23.6014
PF3D7_0730900	Plasmodium falciparum 3D7	EMP1-trafficking protein	PTP4	Previous IDs: MAL7P1.171	1130	0	0.00112964	1.8339	0.0847891	0.521707	0.103585	0.119419	20.883	20.9762	20.9641	20.6763	21.4953	20.9061	24.9325	25.1699	24.9658	25.1873	25.065	25.1742
PF3D7_0730900	Plasmodium falciparum 3D7	EMP1-trafficking protein	PTP4	Previous IDs: MAL7P1.171	1184	0	0.166211	0.452662	-0.279603	0.388172	0.153686	-0.0885474	23.1078	23.0676	23.1001	22.9464	22.5675	22.9228	25.073	25.2372	25.2112	25.1853	24.9169	25.1535
PF3D7_0730900	Plasmodium falciparum 3D7	EMP1-trafficking protein	PTP4	Previous IDs: MAL7P1.171	805	0	0.195865	0.414728	0.0759378	0.416748	0.143395	-0.0790156	27.0071	27.1222	26.6667	26.8929	27.0921	27.0389	29.5792	29.539	29.5997	29.3671	29.5626	29.5511
PF3D7_0730900	Plasmodium falciparum 3D7	EMP1-trafficking protein	PTP4	Previous IDs: MAL7P1.171	1463	0	0.138336	0.505129	-0.367745	0.923273	0.0162478	-0.171503	24.2096	24.1876	24.1469	24.0205	23.5297	23.8906	25.6622	25.586	25.3361	25.4199	25.2848	25.3651
PF3D7_0730900	Plasmodium falciparum 3D7	EMP1-trafficking protein	PTP4	Previous IDs: MAL7P1.171	1962	1	NA	NA	NA	0.0210514	0.793874	-1.71545	NA	NA	NA	NA	NA	NA	20.4814	20.8993	20.2589	17.9972	19.3958	19.1001
PF3D7_0730900	Plasmodium falciparum 3D7	EMP1-trafficking protein	PTP4	Previous IDs: MAL7P1.171	1509	0	0.0830412	0.626328	-0.682974	0.455019	0.132123	0.0677875	21.3497	21.669	21.5611	20.4526	21.4143	20.6639	24.3842	24.6276	24.2573	24.633	24.377	24.4626
PF3D7_0730900	Plasmodium falciparum 3D7	EMP1-trafficking protein	PTP4	Previous IDs: MAL7P1.171	1641	0	0.532476	0.164519	-0.172887	0.214672	0.263299	-0.300686	23.903	24.3333	23.7788	23.5483	24.2942	23.6538	25.702	25.5152	25.7626	25.7144	24.9942	25.369
PF3D7_0730900	Plasmodium falciparum 3D7	EMP1-trafficking protein	PTP4	Previous IDs: MAL7P1.171	1740	0	0.700552	0.0896185	-0.0510389	0.738193	0.0602819	0.142384	24.2341	24.3129	23.9977	24.2761	24.1118	24.0036	25.3913	24.881	25.1748	25.4211	25.111	25.3421
PF3D7_0730900	Plasmodium falciparum 3D7	EMP1-trafficking protein	PTP4	Previous IDs: MAL7P1.171	1887	1	NA	NA	NA	0.0210514	0.793874	-1.71545	NA	NA	NA	NA	NA	NA	20.4814	20.8993	20.2589	17.9972	19.3958	19.1001
PF3D7_0730900	Plasmodium falciparum 3D7	EMP1-trafficking protein	PTP4	Previous IDs: MAL7P1.171	1383	0	0.708437	0.0879099	0.226391	0.449624	0.132123	-0.201172	24.4357	25.2188	25.4194	25.1637	25.3526	25.2368	26.1074	26.6156	26.7527	26.4315	26.1294	26.3113
PF3D7_0730900	Plasmodium falciparum 3D7	EMP1-trafficking protein	PTP4	Previous IDs: MAL7P1.171	1191	0	0.708437	0.0879099	0.226391	0.449624	0.132123	-0.201172	24.4357	25.2188	25.4194	25.1637	25.3526	25.2368	26.1074	26.6156	26.7527	26.4315	26.1294	26.3113
PF3D7_0730900	Plasmodium falciparum 3D7	EMP1-trafficking protein	PTP4	Previous IDs: MAL7P1.171	673	0	0.105023	0.563508	0.142386	0.0194091	0.793874	-0.178296	26.2736	26.8754	26.7869	26.7654	26.7248	26.8728	26.8783	26.9168	26.9678	26.7885	26.6456	26.7938
PF3D7_0730900	Plasmodium falciparum 3D7	EMP1-trafficking protein	PTP4	Previous IDs: MAL7P1.171	827	0	0.0209323	0.997008	0.0965335	0.162171	0.300924	-0.0693864	26.461	26.5626	26.2699	26.4905	26.5482	26.5445	30.1273	30.1037	30.1743	30.0191	30.0935	30.0846
PF3D7_0730900	Plasmodium falciparum 3D7	EMP1-trafficking protein	PTP4	Previous IDs: MAL7P1.171	481	0	0.371755	0.245036	-0.253254	0.284042	0.205694	-0.156189	24.4657	24.324	24.2936	23.8969	24.066	24.3607	25.0895	24.6963	24.7857	24.6783	24.7937	24.6309
PF3D7_0730900	Plasmodium falciparum 3D7	EMP1-trafficking protein	PTP4	Previous IDs: MAL7P1.171	1010	0	0.712253	0.0873677	0.0581247	0.524769	0.102066	-0.151845	24.3768	24.3308	24.1627	24.5847	24.4276	24.0323	25.3035	25.2219	25.4361	25.2188	25.1122	25.175
PF3D7_0730900	Plasmodium falciparum 3D7	EMP1-trafficking protein	PTP4	Previous IDs: MAL7P1.171	1896	0	7.30382e-05	2.6073	0.95437	0.016962	0.793874	0.628158	22.5141	22.5787	22.7417	23.8144	23.4493	23.4339	23.7515	23.9435	23.7199	24.1818	24.3945	24.723
PF3D7_0730900	Plasmodium falciparum 3D7	EMP1-trafficking protein	PTP4	Previous IDs: MAL7P1.171	1154	0	0.299177	0.313996	-0.0222872	0.159778	0.300924	-0.119497	23.9625	23.8298	23.6451	23.7921	23.8408	23.7377	25.8735	25.7951	25.8879	25.9308	25.5714	25.6958
PF3D7_0730900	Plasmodium falciparum 3D7	EMP1-trafficking protein	PTP4	Previous IDs: MAL7P1.171	1667	0	0.355296	0.256658	0.584715	0.304202	0.193288	0.0829513	22.5178	21.7675	22.3484	22.942	22.773	22.6728	24.4294	24.5506	24.7194	24.6838	24.5151	24.7494
PF3D7_0730900	Plasmodium falciparum 3D7	EMP1-trafficking protein	PTP4	Previous IDs: MAL7P1.171	2052	0	1.03219e-06	4.16902	0.933995	0.32759	0.178994	0.144851	21.6814	22.1623	22.2437	23.0523	22.9876	22.8494	25.75	26.1522	25.6053	25.9282	25.8812	26.1325
PF3D7_0730900	Plasmodium falciparum 3D7	EMP1-trafficking protein	PTP4	Previous IDs: MAL7P1.171	1753	0	0.631409	0.120639	-0.134266	0.728606	0.0613185	0.132135	20.4304	20.1622	20.4414	20.3046	20.575	19.7517	20.7351	21.4432	21.0185	21.125	21.1029	21.3653
PF3D7_0730900	Plasmodium falciparum 3D7	EMP1-trafficking protein	PTP4	Previous IDs: MAL7P1.171	1280	0	0.166211	0.452662	-0.279603	0.388172	0.153686	-0.0885474	23.1078	23.0676	23.1001	22.9464	22.5675	22.9228	25.073	25.2372	25.2112	25.1853	24.9169	25.1535
PF3D7_0730900	Plasmodium falciparum 3D7	EMP1-trafficking protein	PTP4	Previous IDs: MAL7P1.171	1909	0	0.00543904	1.40385	0.815769	0.265013	0.213732	0.226849	19.5034	19.5948	20.2401	20.6127	20.5282	20.6448	23.9128	24.4203	23.9627	23.9916	24.3363	24.6485
PF3D7_0730900	Plasmodium falciparum 3D7	EMP1-trafficking protein	PTP4	Previous IDs: MAL7P1.171	1671	0	0.0180347	1.02256	1.14608	0.208494	0.265586	0.0983532	23.2609	22.2331	23.0091	24.0639	24.113	23.7645	25.126	25.1949	25.5732	25.3928	25.35	25.4464
PF3D7_0730900	Plasmodium falciparum 3D7	EMP1-trafficking protein	PTP4	Previous IDs: MAL7P1.171	1214	0	NA	NA	NA	0.617545	0.0837595	-0.0992915	NA	NA	NA	NA	NA	NA	24.2627	23.4501	22.9704	23.6675	23.1475	23.5703
PF3D7_0730900	Plasmodium falciparum 3D7	EMP1-trafficking protein	PTP4	Previous IDs: MAL7P1.171	2065	0	NA	NA	NA	0.456155	0.132123	0.496055	NA	NA	NA	NA	NA	NA	21.7027	22.7949	22.6247	22.8986	22.8981	22.8138
PF3D7_0730900	Plasmodium falciparum 3D7	EMP1-trafficking protein	PTP4	Previous IDs: MAL7P1.171	1993	0	4.44648e-07	4.41826	1.01206	0.569643	0.0982876	0.393067	22.4644	22.2349	22.1229	23.3293	23.3136	23.2154	25.8357	25.9407	26.0089	26.2508	26.1899	26.5239
PF3D7_0730900	Plasmodium falciparum 3D7	EMP1-trafficking protein	PTP4	Previous IDs: MAL7P1.171	177	0	0.693921	0.0920807	-0.211956	0.417998	0.14309	0.22702	24.6096	24.8407	24.4971	24.3013	24.3316	24.6786	25.7461	25.438	25.6946	25.7193	26.0348	25.8057
PF3D7_0730900	Plasmodium falciparum 3D7	EMP1-trafficking protein	PTP4	Previous IDs: MAL7P1.171	1839	0	0.00215559	1.62309	-0.733754	0.838731	0.0332944	0.108757	22.0939	22.2424	21.9357	21.3709	21.3271	21.3726	24.3974	24.4234	23.8792	24.2891	24.26	24.4771
PF3D7_0730900	Plasmodium falciparum 3D7	EMP1-trafficking protein	PTP4	Previous IDs: MAL7P1.171	1997	0	2.06766e-07	4.5911	0.993673	0.423561	0.140319	0.237101	22.51	22.6306	22.6422	23.6306	23.607	23.5262	25.8866	26.3312	25.6824	26.0908	26.0532	26.4674
PF3D7_0730900	Plasmodium falciparum 3D7	EMP1-trafficking protein	PTP4	Previous IDs: MAL7P1.171	694	0	0.0254028	0.953071	0.207912	0.118237	0.369777	-0.11883	25.4939	25.6856	25.3441	25.7089	25.7698	25.6686	29.2902	29.2481	29.3126	29.0684	29.1787	29.2474
PF3D7_0730900	Plasmodium falciparum 3D7	EMP1-trafficking protein	PTP4	Previous IDs: MAL7P1.171	1226	0	0.00435518	1.46909	0.593303	0.964126	0.00594325	0.00674972	22.1832	21.7615	22.1457	22.7878	22.4529	22.6296	24.7268	24.8741	25.1116	24.9668	24.8726	24.8933
PF3D7_0730900	Plasmodium falciparum 3D7	EMP1-trafficking protein	PTP4	Previous IDs: MAL7P1.171	1539	0	0.299177	0.313996	-0.0222872	0.0911855	0.437512	-0.154856	23.9625	23.8298	23.6451	23.7921	23.8408	23.7377	26.096	26.0377	26.0644	26.0799	25.7717	25.882
PF3D7_0730900	Plasmodium falciparum 3D7	EMP1-trafficking protein	PTP4	Previous IDs: MAL7P1.171	2006	1	NA	NA	NA	0.0210514	0.793874	-1.71545	NA	NA	NA	NA	NA	NA	20.4814	20.8993	20.2589	17.9972	19.3958	19.1001
PF3D7_0730900	Plasmodium falciparum 3D7	EMP1-trafficking protein	PTP4	Previous IDs: MAL7P1.171	1118	0	0.265603	0.330877	-0.494049	0.345147	0.167842	0.12537	21.8615	23.0172	22.9766	22.1244	22.2125	22.0362	22.5393	22.4727	21.9514	22.1372	22.3576	22.8448
PF3D7_0730900	Plasmodium falciparum 3D7	EMP1-trafficking protein	PTP4	Previous IDs: MAL7P1.171	1701	0	0.875385	0.038708	-0.00694361	0.184449	0.282634	-0.0533994	20.3845	20.2922	20.2449	20.312	20.3003	20.2885	24.8165	24.4872	24.4322	24.9164	24.4917	24.1677
PF3D7_0730900	Plasmodium falciparum 3D7	EMP1-trafficking protein	PTP4	Previous IDs: MAL7P1.171	497	0	0.224331	0.374502	-0.00206667	0.942129	0.00941044	-0.0591847	24.0066	24.1359	24.1392	24.1977	24.2004	23.8774	25.4901	25.1819	25.3778	25.2267	25.405	25.2406
PF3D7_0730900	Plasmodium falciparum 3D7	EMP1-trafficking protein	PTP4	Previous IDs: MAL7P1.171	1949	0	4.44648e-07	4.41826	1.01206	0.569643	0.0982876	0.393067	22.4644	22.2349	22.1229	23.3293	23.3136	23.2154	25.8357	25.9407	26.0089	26.2508	26.1899	26.5239
PF3D7_0730900	Plasmodium falciparum 3D7	EMP1-trafficking protein	PTP4	Previous IDs: MAL7P1.171	1125	0	0.0830412	0.626328	-0.682974	0.455019	0.132123	0.0677875	21.3497	21.669	21.5611	20.4526	21.4143	20.6639	24.3842	24.6276	24.2573	24.633	24.377	24.4626
PF3D7_0730900	Plasmodium falciparum 3D7	EMP1-trafficking protein	PTP4	Previous IDs: MAL7P1.171	475	0	0.733756	0.0786189	0.00343111	0.294749	0.196736	-0.0243347	24.8806	24.899	24.8439	24.8347	24.9156	24.8835	26.558	26.404	26.5132	26.5111	26.422	26.4691
PF3D7_0730900	Plasmodium falciparum 3D7	EMP1-trafficking protein	PTP4	Previous IDs: MAL7P1.171	1634	0	0.299177	0.313996	-0.0222872	0.159778	0.300924	-0.119497	23.9625	23.8298	23.6451	23.7921	23.8408	23.7377	25.8735	25.7951	25.8879	25.9308	25.5714	25.6958
PF3D7_0730900	Plasmodium falciparum 3D7	EMP1-trafficking protein	PTP4	Previous IDs: MAL7P1.171	156	0	0.136299	0.506262	-0.304515	0.169146	0.300197	0.155091	23.366	23.2846	23.2302	23.0771	22.7065	23.1837	24.4528	24.0123	24.6465	24.6817	24.669	24.2262
PF3D7_0730900	Plasmodium falciparum 3D7	EMP1-trafficking protein	PTP4	Previous IDs: MAL7P1.171	311	0	0.0520648	0.754066	0.0481832	0.310343	0.187034	-0.0400006	22.2812	22.2148	21.814	22.3174	22.0825	22.0546	23.9515	23.766	23.7706	23.7837	23.7443	23.8402
PF3D7_0730900	Plasmodium falciparum 3D7	EMP1-trafficking protein	PTP4	Previous IDs: MAL7P1.171	1953	1	NA	NA	NA	0.0210514	0.793874	-1.71545	NA	NA	NA	NA	NA	NA	20.4814	20.8993	20.2589	17.9972	19.3958	19.1001
PF3D7_0730900	Plasmodium falciparum 3D7	EMP1-trafficking protein	PTP4	Previous IDs: MAL7P1.171	291	0	0.720379	0.0837794	-0.138314	0.0530563	0.571159	-0.290993	19.227	18.843	19.2376	19.0106	18.8651	19.0169	22.2698	22.6231	22.3567	22.1607	21.9757	22.2402
PF3D7_0730900	Plasmodium falciparum 3D7	EMP1-trafficking protein	PTP4	Previous IDs: MAL7P1.171	1460	0	0.0470074	0.78727	-0.413393	0.975385	0.00594325	-0.14616	24.3656	24.3615	24.2541	24.0802	23.6371	24.0237	25.5406	25.4481	25.2546	25.3031	25.236	25.2658
PF3D7_0730900	Plasmodium falciparum 3D7	EMP1-trafficking protein	PTP4	Previous IDs: MAL7P1.171	2028	0	NA	NA	NA	0.0231624	0.776032	0.687817	NA	NA	NA	NA	NA	NA	22.2125	23.591	22.9643	23.5334	23.517	23.7809
PF3D7_0730900	Plasmodium falciparum 3D7	EMP1-trafficking protein	PTP4	Previous IDs: MAL7P1.171	1135	0	0.0063557	1.35869	0.82901	0.65459	0.0803184	-0.716056	21.7977	21.4796	21.7589	22.295	22.6167	22.6115	24.2635	25.4315	25.3342	25.0828	22.578	25.2201
PF3D7_0730900	Plasmodium falciparum 3D7	EMP1-trafficking protein	PTP4	Previous IDs: MAL7P1.171	1257	0	0.532476	0.164519	-0.172887	0.214672	0.263299	-0.300686	23.903	24.3333	23.7788	23.5483	24.2942	23.6538	25.702	25.5152	25.7626	25.7144	24.9942	25.369
PF3D7_0730900	Plasmodium falciparum 3D7	EMP1-trafficking protein	PTP4	Previous IDs: MAL7P1.171	1251	0	0.299177	0.313996	-0.0222872	0.0911855	0.437512	-0.154856	23.9625	23.8298	23.6451	23.7921	23.8408	23.7377	26.096	26.0377	26.0644	26.0799	25.7717	25.882
PF3D7_0730900	Plasmodium falciparum 3D7	EMP1-trafficking protein	PTP4	Previous IDs: MAL7P1.171	1964	0	1.03219e-06	4.16902	0.933995	0.32759	0.178994	0.144851	21.6814	22.1623	22.2437	23.0523	22.9876	22.8494	25.75	26.1522	25.6053	25.9282	25.8812	26.1325
PF3D7_0730900	Plasmodium falciparum 3D7	EMP1-trafficking protein	PTP4	Previous IDs: MAL7P1.171	1479	0	0.708437	0.0879099	0.226391	0.449624	0.132123	-0.201172	24.4357	25.2188	25.4194	25.1637	25.3526	25.2368	26.1074	26.6156	26.7527	26.4315	26.1294	26.3113
PF3D7_0730900	Plasmodium falciparum 3D7	EMP1-trafficking protein	PTP4	Previous IDs: MAL7P1.171	598	0	0.0312842	0.881893	-0.136642	0.876406	0.0243094	0.062455	23.2337	23.3484	22.9829	23.0121	22.9101	23.2328	25.6384	24.9344	25.0412	25.1442	25.1865	25.4707
PF3D7_0730900	Plasmodium falciparum 3D7	EMP1-trafficking protein	PTP4	Previous IDs: MAL7P1.171	1741	0	0.982124	0.00588349	-0.0478111	0.864698	0.0251369	-0.0239633	22.2545	22.0168	22.2307	22.06	22.1352	22.1634	24.8789	24.7185	24.9787	25.0144	24.6698	24.8199
PF3D7_0730900	Plasmodium falciparum 3D7	EMP1-trafficking protein	PTP4	Previous IDs: MAL7P1.171	620	0	0.145614	0.488101	-0.0565807	0.708198	0.0639129	-0.0945864	22.0111	22.787	22.6861	22.6502	22.0963	22.568	26.5147	26.2987	26.3967	26.5952	26.1537	26.1774
PF3D7_0730900	Plasmodium falciparum 3D7	EMP1-trafficking protein	PTP4	Previous IDs: MAL7P1.171	1820	0	NA	NA	NA	0.161356	0.300924	0.0813333	NA	NA	NA	NA	NA	NA	23.289	23.7389	23.2957	23.5653	23.1856	23.8168
PF3D7_0730900	Plasmodium falciparum 3D7	EMP1-trafficking protein	PTP4	Previous IDs: MAL7P1.171	1271	0	0.138336	0.505129	-0.367745	0.923273	0.0162478	-0.171503	24.2096	24.1876	24.1469	24.0205	23.5297	23.8906	25.6622	25.586	25.3361	25.4199	25.2848	25.3651
PF3D7_0730900	Plasmodium falciparum 3D7	EMP1-trafficking protein	PTP4	Previous IDs: MAL7P1.171	871	0	0.698737	0.090293	0.150066	0.57477	0.0982876	-0.110509	23.5641	23.8705	23.3272	23.6608	23.9139	23.6374	25.7679	25.5871	25.6073	25.388	25.6326	25.6103
PF3D7_0730900	Plasmodium falciparum 3D7	EMP1-trafficking protein	PTP4	Previous IDs: MAL7P1.171	1664	0	0.166211	0.452662	-0.279603	0.276498	0.209201	0.0516796	23.1078	23.0676	23.1001	22.9464	22.5675	22.9228	24.7513	24.744	24.8709	24.8585	24.7278	24.9349
PF3D7_0730900	Plasmodium falciparum 3D7	EMP1-trafficking protein	PTP4	Previous IDs: MAL7P1.171	981	0	0.0108087	1.19029	-0.401997	0.202215	0.26569	-0.229217	24.4451	24.2095	24.4914	23.9579	24.1351	23.847	24.7516	24.9283	25.0699	24.7004	24.6251	24.7367
PF3D7_0730900	Plasmodium falciparum 3D7	EMP1-trafficking protein	PTP4	Previous IDs: MAL7P1.171	1825	0	NA	NA	NA	0.604149	0.0877132	0.150289	NA	NA	NA	NA	NA	NA	23.8953	24.3676	24.1	24.1542	24.0938	24.5658
PF3D7_0730900	Plasmodium falciparum 3D7	EMP1-trafficking protein	PTP4	Previous IDs: MAL7P1.171	782	0	0.269288	0.326939	0.472445	0.541234	0.0982876	0.0181396	24.3294	24.7051	24.5603	25.1864	24.9916	24.8341	26.387	26.3013	26.5298	26.4488	26.4462	26.3775
PF3D7_0730900	Plasmodium falciparum 3D7	EMP1-trafficking protein	PTP4	Previous IDs: MAL7P1.171	1283	0	0.919939	0.0252054	-0.0101981	0.502354	0.1097	-0.0706714	22.9717	22.8801	23.1795	23.067	22.9179	23.0158	24.6996	25.0288	25.0428	24.9821	24.6436	24.9335
PF3D7_0730900	Plasmodium falciparum 3D7	EMP1-trafficking protein	PTP4	Previous IDs: MAL7P1.171	877	0	0.0323167	0.874273	-0.194945	0.0477919	0.590556	-0.140413	23.2494	23.4876	23.2292	23.1748	23.0016	23.205	25.5983	25.206	25.4316	25.2292	25.365	25.2205
PF3D7_0730900	Plasmodium falciparum 3D7	EMP1-trafficking protein	PTP4	Previous IDs: MAL7P1.171	1764	0	0.0394439	0.826319	-0.488656	0.378679	0.155418	0.421259	24.6646	24.352	24.1392	23.7575	23.8631	24.0692	25.7804	25.6265	24.6547	26.0146	25.6114	25.6995
PF3D7_0730900	Plasmodium falciparum 3D7	EMP1-trafficking protein	PTP4	Previous IDs: MAL7P1.171	1762	0	NA	NA	NA	0.732152	0.0605844	0.00730011	NA	NA	NA	NA	NA	NA	22.2626	22.5432	22.4094	22.4847	22.3517	22.4008
PF3D7_0730900	Plasmodium falciparum 3D7	EMP1-trafficking protein	PTP4	Previous IDs: MAL7P1.171	321	0	0.189714	0.417747	0.30342	0.388361	0.153686	-0.153512	22.1478	21.939	21.8214	22.4493	22.2387	22.1304	23.9786	24.0427	23.721	23.7422	23.5986	23.9411
PF3D7_0730900	Plasmodium falciparum 3D7	EMP1-trafficking protein	PTP4	Previous IDs: MAL7P1.171	994	0	0.611262	0.127054	-0.134441	0.561681	0.0982876	-0.043461	23.3165	23.6672	23.5773	23.7869	23.2323	23.1385	25.3361	24.9606	24.7052	24.9765	24.9066	24.9885
PF3D7_0730900	Plasmodium falciparum 3D7	EMP1-trafficking protein	PTP4	Previous IDs: MAL7P1.171	1025	0	0.165966	0.452662	-0.159337	0.234572	0.247661	-0.134097	24.4893	24.5385	24.5821	24.4822	24.4233	24.2264	25.2624	25.0329	24.8636	24.9341	24.9244	24.8981
PF3D7_0730900	Plasmodium falciparum 3D7	EMP1-trafficking protein	PTP4	Previous IDs: MAL7P1.171	1610	0	0.00112964	1.8339	0.0847891	0.521707	0.103585	0.119419	20.883	20.9762	20.9641	20.6763	21.4953	20.9061	24.9325	25.1699	24.9658	25.1873	25.065	25.1742
PF3D7_0730900	Plasmodium falciparum 3D7	EMP1-trafficking protein	PTP4	Previous IDs: MAL7P1.171	525	0	0.102938	0.569169	-0.488529	0.85706	0.0270572	-0.0290082	24.0264	24.0277	23.5561	23.1339	23.262	23.7488	25.7832	25.2721	25.3286	25.3641	25.5574	25.3754
PF3D7_0730900	Plasmodium falciparum 3D7	EMP1-trafficking protein	PTP4	Previous IDs: MAL7P1.171	1353	0	0.532476	0.164519	-0.172887	0.214672	0.263299	-0.300686	23.903	24.3333	23.7788	23.5483	24.2942	23.6538	25.702	25.5152	25.7626	25.7144	24.9942	25.369
PF3D7_0730900	Plasmodium falciparum 3D7	EMP1-trafficking protein	PTP4	Previous IDs: MAL7P1.171	2072	0	NA	NA	NA	0.0231624	0.776032	0.687817	NA	NA	NA	NA	NA	NA	22.2125	23.591	22.9643	23.5334	23.517	23.7809
PF3D7_0730900	Plasmodium falciparum 3D7	EMP1-trafficking protein	PTP4	Previous IDs: MAL7P1.171	1030	0	0.078437	0.639878	-0.185493	0.439352	0.132248	-0.218166	24.2549	24.3757	24.3522	24.2084	24.2393	23.9785	24.246	23.8472	23.7165	23.6958	23.7414	23.718
PF3D7_0730900	Plasmodium falciparum 3D7	EMP1-trafficking protein	PTP4	Previous IDs: MAL7P1.171	1940	0	0.495916	0.180961	0.167758	0.219217	0.262465	0.388683	20.3116	19.9987	20.7105	20.4422	20.3985	20.6833	22.7661	23.5701	22.9447	23.2245	23.4781	23.7442
PF3D7_0730900	Plasmodium falciparum 3D7	EMP1-trafficking protein	PTP4	Previous IDs: MAL7P1.171	2006	0	2.29353e-06	3.91405	1.01778	0.187289	0.282634	0.255587	21.7466	22.1135	22.2917	23.1578	23.0451	23.0023	24.9059	25.3249	24.7856	25.1213	25.1658	25.496
PF3D7_0730900	Plasmodium falciparum 3D7	EMP1-trafficking protein	PTP4	Previous IDs: MAL7P1.171	1548	0	0.0700767	0.669106	-0.478407	0.682231	0.0743748	-0.245963	24.8235	24.93	24.7163	24.3772	24.1436	24.5138	25.6407	25.3747	25.3943	25.3876	25.0387	25.2455
PF3D7_0730900	Plasmodium falciparum 3D7	EMP1-trafficking protein	PTP4	Previous IDs: MAL7P1.171	1367	0	0.138336	0.505129	-0.367745	0.923273	0.0162478	-0.171503	24.2096	24.1876	24.1469	24.0205	23.5297	23.8906	25.6622	25.586	25.3361	25.4199	25.2848	25.3651
PF3D7_0730900	Plasmodium falciparum 3D7	EMP1-trafficking protein	PTP4	Previous IDs: MAL7P1.171	2087	0	0.0294676	0.902946	-0.531346	0.213595	0.263299	0.670511	22.4986	22.3282	22.5555	21.8727	21.7116	22.2039	22.0644	22.4039	21.6885	22.1291	22.9636	23.0756
PF3D7_0730900	Plasmodium falciparum 3D7	EMP1-trafficking protein	PTP4	Previous IDs: MAL7P1.171	2015	0	0.00144989	1.75004	1.37127	0.505034	0.1097	0.328167	20.2872	20.8275	20.9472	22.3622	22.1266	21.687	25.4757	25.2766	26.0174	26.1653	26.0903	25.4985
PF3D7_0730900	Plasmodium falciparum 3D7	EMP1-trafficking protein	PTP4	Previous IDs: MAL7P1.171	1310	0	NA	NA	NA	0.617545	0.0837595	-0.0992915	NA	NA	NA	NA	NA	NA	24.2627	23.4501	22.9704	23.6675	23.1475	23.5703
PF3D7_0730900	Plasmodium falciparum 3D7	EMP1-trafficking protein	PTP4	Previous IDs: MAL7P1.171	2091	0	0.118369	0.539963	0.0425444	0.406108	0.143541	0.406729	21.9622	21.9304	22.0722	22.2567	21.9411	21.8946	22.573	23.031	22.2963	22.6999	23.0484	23.3722
PF3D7_0730900	Plasmodium falciparum 3D7	EMP1-trafficking protein	PTP4	Previous IDs: MAL7P1.171	657	0	0.123585	0.528756	-0.427089	0.167413	0.300197	-0.173923	23.9446	24.2771	23.8907	23.4103	23.4444	23.9764	24.373	24.146	24.2324	24.1028	23.9892	24.1376
PF3D7_0730900	Plasmodium falciparum 3D7	EMP1-trafficking protein	PTP4	Previous IDs: MAL7P1.171	202	0	0.856983	0.041792	-0.0868822	0.000370342	1.91691	-1.0693	23.6142	24.6572	23.283	23.9437	23.4013	23.9488	27.2336	26.7646	26.9443	25.7212	26.0713	25.9421
PF3D7_0730900	Plasmodium falciparum 3D7	EMP1-trafficking protein	PTP4	Previous IDs: MAL7P1.171	2021	0	NA	NA	NA	0.456155	0.132123	0.496055	NA	NA	NA	NA	NA	NA	21.7027	22.7949	22.6247	22.8986	22.8981	22.8138
PF3D7_0730900	Plasmodium falciparum 3D7	EMP1-trafficking protein	PTP4	Previous IDs: MAL7P1.171	761	0	0.0266579	0.936521	0.186821	0.167404	0.300197	-0.159583	23.8505	23.9954	23.826	24.0951	24.1923	23.9449	25.4981	25.5164	25.6288	25.2167	25.474	25.4739
PF3D7_0730900	Plasmodium falciparum 3D7	EMP1-trafficking protein	PTP4	Previous IDs: MAL7P1.171	1883	0	4.48326e-06	3.66247	1.14621	0.334414	0.175839	0.483552	21.0294	21.0003	21.3179	22.4175	22.139	22.2298	25.671	25.6211	25.7654	26.0434	26.0547	26.4101
PF3D7_0730900	Plasmodium falciparum 3D7	EMP1-trafficking protein	PTP4	Previous IDs: MAL7P1.171	1187	0	0.919939	0.0252054	-0.0101981	0.502354	0.1097	-0.0706714	22.9717	22.8801	23.1795	23.067	22.9179	23.0158	24.6996	25.0288	25.0428	24.9821	24.6436	24.9335
PF3D7_0730900	Plasmodium falciparum 3D7	EMP1-trafficking protein	PTP4	Previous IDs: MAL7P1.171	1250	0	0.299177	0.313996	-0.0222872	0.159778	0.300924	-0.119497	23.9625	23.8298	23.6451	23.7921	23.8408	23.7377	25.8735	25.7951	25.8879	25.9308	25.5714	25.6958
PF3D7_0730900	Plasmodium falciparum 3D7	EMP1-trafficking protein	PTP4	Previous IDs: MAL7P1.171	1806	0	NA	NA	NA	0.897782	0.0193312	0.0781878	NA	NA	NA	NA	NA	NA	22.1569	21.2304	21.8128	22.3252	21.6802	21.4293
PF3D7_0730900	Plasmodium falciparum 3D7	EMP1-trafficking protein	PTP4	Previous IDs: MAL7P1.171	906	0	0.00441466	1.46881	1.58254	0.51009	0.108982	0.0196355	22.8104	23.5568	23.2803	25.0347	24.7782	24.5823	26.707	26.4749	26.6528	26.5139	26.5357	26.844
PF3D7_0730900	Plasmodium falciparum 3D7	EMP1-trafficking protein	PTP4	Previous IDs: MAL7P1.171	2102	1	2.24177e-05	3.07887	-2.86603	NA	NA	NA	21.401	21.4006	21.5377	18.3487	18.8835	18.509	NA	NA	NA	NA	NA	NA
PF3D7_0730900	Plasmodium falciparum 3D7	EMP1-trafficking protein	PTP4	Previous IDs: MAL7P1.171	510	0	0.431114	0.218111	0.116688	0.905179	0.017816	-0.00748806	24.387	24.8746	24.5263	24.7041	24.721	24.7129	25.4444	24.9817	24.8835	24.9573	25.3243	25.0055
PF3D7_0730900	Plasmodium falciparum 3D7	EMP1-trafficking protein	PTP4	Previous IDs: MAL7P1.171	826	0	0.0254028	0.953071	0.207912	0.118237	0.369777	-0.11883	25.4939	25.6856	25.3441	25.7089	25.7698	25.6686	29.2902	29.2481	29.3126	29.0684	29.1787	29.2474
PF3D7_0730900	Plasmodium falciparum 3D7	EMP1-trafficking protein	PTP4	Previous IDs: MAL7P1.171	1519	0	0.0063557	1.35869	0.82901	0.65459	0.0803184	-0.716056	21.7977	21.4796	21.7589	22.295	22.6167	22.6115	24.2635	25.4315	25.3342	25.0828	22.578	25.2201
PF3D7_0730900	Plasmodium falciparum 3D7	EMP1-trafficking protein	PTP4	Previous IDs: MAL7P1.171	1896	1	NA	NA	NA	0.0210514	0.793874	-1.71545	NA	NA	NA	NA	NA	NA	20.4814	20.8993	20.2589	17.9972	19.3958	19.1001
PF3D7_0730900	Plasmodium falciparum 3D7	EMP1-trafficking protein	PTP4	Previous IDs: MAL7P1.171	2041	1	NA	NA	NA	0.0210514	0.793874	-1.71545	NA	NA	NA	NA	NA	NA	20.4814	20.8993	20.2589	17.9972	19.3958	19.1001
PF3D7_0730900	Plasmodium falciparum 3D7	EMP1-trafficking protein	PTP4	Previous IDs: MAL7P1.171	1592	0	0.114563	0.546504	-0.391605	0.410555	0.143541	0.439111	23.7907	23.8012	23.9821	23.5443	23.3866	23.4682	24.4225	24.773	24.9208	25.1672	25.0786	25.1878
PF3D7_0730900	Plasmodium falciparum 3D7	EMP1-trafficking protein	PTP4	Previous IDs: MAL7P1.171	355	0	NA	NA	NA	0.0513359	0.579622	-0.223129	NA	NA	NA	NA	NA	NA	23.42	23.46	23.4097	23.1864	23.1083	23.3257
PF3D7_0730900	Plasmodium falciparum 3D7	EMP1-trafficking protein	PTP4	Previous IDs: MAL7P1.171	1155	0	0.299177	0.313996	-0.0222872	0.0911855	0.437512	-0.154856	23.9625	23.8298	23.6451	23.7921	23.8408	23.7377	26.096	26.0377	26.0644	26.0799	25.7717	25.882
PF3D7_0730900	Plasmodium falciparum 3D7	EMP1-trafficking protein	PTP4	Previous IDs: MAL7P1.171	1652	0	0.0470074	0.78727	-0.413393	0.975385	0.00594325	-0.14616	24.3656	24.3615	24.2541	24.0802	23.6371	24.0237	25.5406	25.4481	25.2546	25.3031	25.236	25.2658
PF3D7_0730900	Plasmodium falciparum 3D7	EMP1-trafficking protein	PTP4	Previous IDs: MAL7P1.171	295	0	0.412813	0.22654	0.0830194	0.465791	0.125837	0.0790958	20.186	19.7965	20.2909	20.319	20.0656	20.1379	21.2667	22.8047	22.1698	22.2323	21.8429	22.4034
PF3D7_0730900	Plasmodium falciparum 3D7	EMP1-trafficking protein	PTP4	Previous IDs: MAL7P1.171	1003	0	0.806915	0.0556801	-0.168273	0.118939	0.369777	-0.279086	23.2841	23.6347	23.5002	23.4753	23.3448	23.0942	25.4401	25.163	25.3131	25.0628	24.9205	25.0955
PF3D7_0730900	Plasmodium falciparum 3D7	EMP1-trafficking protein	PTP4	Previous IDs: MAL7P1.171	1356	0	0.0700767	0.669106	-0.478407	0.682231	0.0743748	-0.245963	24.8235	24.93	24.7163	24.3772	24.1436	24.5138	25.6407	25.3747	25.3943	25.3876	25.0387	25.2455
PF3D7_0730900	Plasmodium falciparum 3D7	EMP1-trafficking protein	PTP4	Previous IDs: MAL7P1.171	959	0	0.0209323	0.997008	0.0965335	0.162171	0.300924	-0.0693864	26.461	26.5626	26.2699	26.4905	26.5482	26.5445	30.1273	30.1037	30.1743	30.0191	30.0935	30.0846
PF3D7_0730900	Plasmodium falciparum 3D7	EMP1-trafficking protein	PTP4	Previous IDs: MAL7P1.171	1905	0	1.362e-06	4.07343	1.09726	0.300583	0.193288	0.455299	20.4529	20.1961	20.7064	21.5402	21.5615	21.5455	25.3767	25.2796	25.4016	25.6235	25.7403	26.06
PF3D7_0730900	Plasmodium falciparum 3D7	EMP1-trafficking protein	PTP4	Previous IDs: MAL7P1.171	1742	0	0.984501	0.0052243	-0.0461972	0.785078	0.0431169	-0.115944	21.2647	20.8688	21.3472	20.9519	21.1468	21.2433	24.3283	24.4059	24.5626	24.5069	24.2075	24.2346
PF3D7_0730900	Plasmodium falciparum 3D7	EMP1-trafficking protein	PTP4	Previous IDs: MAL7P1.171	1475	0	0.919939	0.0252054	-0.0101981	0.502354	0.1097	-0.0706714	22.9717	22.8801	23.1795	23.067	22.9179	23.0158	24.6996	25.0288	25.0428	24.9821	24.6436	24.9335
PF3D7_0730900	Plasmodium falciparum 3D7	EMP1-trafficking protein	PTP4	Previous IDs: MAL7P1.171	1164	0	0.0700767	0.669106	-0.478407	0.682231	0.0743748	-0.245963	24.8235	24.93	24.7163	24.3772	24.1436	24.5138	25.6407	25.3747	25.3943	25.3876	25.0387	25.2455
PF3D7_0730900	Plasmodium falciparum 3D7	EMP1-trafficking protein	PTP4	Previous IDs: MAL7P1.171	972	0	0.119086	0.539233	-0.162504	0.0655221	0.522474	-0.293983	24.2653	24.3128	24.2802	24.1425	24.1152	24.113	25.5055	25.6697	25.7678	25.287	25.2878	25.4861
PF3D7_0730900	Plasmodium falciparum 3D7	EMP1-trafficking protein	PTP4	Previous IDs: MAL7P1.171	1406	0	NA	NA	NA	0.617545	0.0837595	-0.0992915	NA	NA	NA	NA	NA	NA	24.2627	23.4501	22.9704	23.6675	23.1475	23.5703
PF3D7_0730900	Plasmodium falciparum 3D7	EMP1-trafficking protein	PTP4	Previous IDs: MAL7P1.171	1751	0	0.631409	0.120639	-0.134266	0.612559	0.0840165	-0.0042344	20.4304	20.1622	20.4414	20.3046	20.575	19.7517	22.6346	22.5908	22.5086	22.5852	22.4328	22.7033
PF3D7_0730900	Plasmodium falciparum 3D7	EMP1-trafficking protein	PTP4	Previous IDs: MAL7P1.171	1984	0	NA	NA	NA	0.0231624	0.776032	0.687817	NA	NA	NA	NA	NA	NA	22.2125	23.591	22.9643	23.5334	23.517	23.7809
PF3D7_0730900	Plasmodium falciparum 3D7	EMP1-trafficking protein	PTP4	Previous IDs: MAL7P1.171	1986	0	0.288511	0.3176	0.0479028	0.00402724	1.20819	0.358161	22.7946	22.6304	22.9093	22.6157	22.7546	23.1077	24.9467	25.5582	24.9401	25.3886	25.4946	25.6362
PF3D7_0730900	Plasmodium falciparum 3D7	EMP1-trafficking protein	PTP4	Previous IDs: MAL7P1.171	1346	0	0.299177	0.313996	-0.0222872	0.159778	0.300924	-0.119497	23.9625	23.8298	23.6451	23.7921	23.8408	23.7377	25.8735	25.7951	25.8879	25.9308	25.5714	25.6958
PF3D7_0730900	Plasmodium falciparum 3D7	EMP1-trafficking protein	PTP4	Previous IDs: MAL7P1.171	1830	0	NA	NA	NA	0.219444	0.262465	0.672495	NA	NA	NA	NA	NA	NA	18.1759	19.1958	18.9696	19.4604	19.733	19.1654
PF3D7_0730900	Plasmodium falciparum 3D7	EMP1-trafficking protein	PTP4	Previous IDs: MAL7P1.171	488	0	0.122856	0.529459	-0.165839	0.844568	0.0315685	-0.144736	22.9746	23.1673	23.1838	23.2733	22.9723	22.5825	23.6066	23.1966	23.2432	23.1288	23.3093	23.1742
PF3D7_0730900	Plasmodium falciparum 3D7	EMP1-trafficking protein	PTP4	Previous IDs: MAL7P1.171	1556	0	0.0470074	0.78727	-0.413393	0.975385	0.00594325	-0.14616	24.3656	24.3615	24.2541	24.0802	23.6371	24.0237	25.5406	25.4481	25.2546	25.3031	25.236	25.2658
PF3D7_0730900	Plasmodium falciparum 3D7	EMP1-trafficking protein	PTP4	Previous IDs: MAL7P1.171	1423	0	0.0155476	1.07243	0.727963	0.65459	0.0803184	-0.716056	22.215	21.7822	22.1274	22.8016	22.6335	22.8733	24.2635	25.4315	25.3342	25.0828	22.578	25.2201
PF3D7_0730900	Plasmodium falciparum 3D7	EMP1-trafficking protein	PTP4	Previous IDs: MAL7P1.171	1920	0	0.15523	0.466367	0.430103	0.0447607	0.604608	0.202937	21.1666	21.3563	21.7992	21.7676	21.8131	22.0317	23.5317	24.0749	23.5741	23.6753	23.9813	24.133
PF3D7_0730900	Plasmodium falciparum 3D7	EMP1-trafficking protein	PTP4	Previous IDs: MAL7P1.171	161	0	0.535652	0.164519	0.117843	0.496885	0.1097	0.0311525	23.778	23.4735	22.9571	23.7689	23.3991	23.3941	24.5535	24.3069	24.6535	24.5909	24.6267	24.3897
PF3D7_0730900	Plasmodium falciparum 3D7	EMP1-trafficking protein	PTP4	Previous IDs: MAL7P1.171	1876	0	0.000951091	1.8826	0.73891	0.619498	0.0837595	0.198613	21.3937	21.6905	21.5878	22.5308	22.2423	22.1157	25.8376	25.923	25.5103	25.9663	25.7819	26.1184
PF3D7_0730900	Plasmodium falciparum 3D7	EMP1-trafficking protein	PTP4	Previous IDs: MAL7P1.171	695	0	0.0209323	0.997008	0.0965335	0.162171	0.300924	-0.0693864	26.461	26.5626	26.2699	26.4905	26.5482	26.5445	30.1273	30.1037	30.1743	30.0191	30.0935	30.0846
PF3D7_0730900	Plasmodium falciparum 3D7	EMP1-trafficking protein	PTP4	Previous IDs: MAL7P1.171	937	0	0.195865	0.414728	0.0759378	0.416748	0.143395	-0.0790156	27.0071	27.1222	26.6667	26.8929	27.0921	27.0389	29.5792	29.539	29.5997	29.3671	29.5626	29.5511
PF3D7_0730900	Plasmodium falciparum 3D7	EMP1-trafficking protein	PTP4	Previous IDs: MAL7P1.171	1172	0	0.0470074	0.78727	-0.413393	0.975385	0.00594325	-0.14616	24.3656	24.3615	24.2541	24.0802	23.6371	24.0237	25.5406	25.4481	25.2546	25.3031	25.236	25.2658
PF3D7_0730900	Plasmodium falciparum 3D7	EMP1-trafficking protein	PTP4	Previous IDs: MAL7P1.171	554	0	0.00648784	1.35242	-0.587484	0.828634	0.033568	-0.0937562	24.1259	24.5645	24.1053	23.672	23.6214	23.7398	25.4797	25.0928	24.7985	24.9961	25.0438	25.0498
PF3D7_0730900	Plasmodium falciparum 3D7	EMP1-trafficking protein	PTP4	Previous IDs: MAL7P1.171	1364	0	0.0470074	0.78727	-0.413393	0.975385	0.00594325	-0.14616	24.3656	24.3615	24.2541	24.0802	23.6371	24.0237	25.5406	25.4481	25.2546	25.3031	25.236	25.2658
PF3D7_0730900	Plasmodium falciparum 3D7	EMP1-trafficking protein	PTP4	Previous IDs: MAL7P1.171	1776	0	0.0436295	0.793998	-0.490388	0.742005	0.0595551	0.0741708	23.2101	23.0993	22.8852	22.4647	22.4674	22.7913	24.8757	25.1437	24.8305	25.1241	24.909	25.0393
PF3D7_0730900	Plasmodium falciparum 3D7	EMP1-trafficking protein	PTP4	Previous IDs: MAL7P1.171	1231	0	0.0155476	1.07243	0.727963	0.65459	0.0803184	-0.716056	22.215	21.7822	22.1274	22.8016	22.6335	22.8733	24.2635	25.4315	25.3342	25.0828	22.578	25.2201
PF3D7_0730900	Plasmodium falciparum 3D7	EMP1-trafficking protein	PTP4	Previous IDs: MAL7P1.171	1942	0	0.380855	0.24346	0.0878544	0.0725196	0.496323	0.313343	21.9669	21.7532	22.1763	21.8912	21.9692	22.2996	23.5419	24.2019	23.6385	23.8087	24.1416	24.372
PF3D7_0730900	Plasmodium falciparum 3D7	EMP1-trafficking protein	PTP4	Previous IDs: MAL7P1.171	717	0	0.0209323	0.997008	0.0965335	0.162171	0.300924	-0.0693864	26.461	26.5626	26.2699	26.4905	26.5482	26.5445	30.1273	30.1037	30.1743	30.0191	30.0935	30.0846
PF3D7_0730900	Plasmodium falciparum 3D7	EMP1-trafficking protein	PTP4	Previous IDs: MAL7P1.171	1712	0	0.717425	0.0846719	-0.0641156	0.963469	0.00594325	0.0287845	24.6666	24.7646	24.8139	24.8407	24.6899	24.5221	25.7649	25.4364	25.7999	25.928	25.5502	25.6095
PF3D7_0730900	Plasmodium falciparum 3D7	EMP1-trafficking protein	PTP4	Previous IDs: MAL7P1.171	1452	0	0.0700767	0.669106	-0.478407	0.682231	0.0743748	-0.245963	24.8235	24.93	24.7163	24.3772	24.1436	24.5138	25.6407	25.3747	25.3943	25.3876	25.0387	25.2455
PF3D7_0730900	Plasmodium falciparum 3D7	EMP1-trafficking protein	PTP4	Previous IDs: MAL7P1.171	563	0	0.00329967	1.49077	-0.619895	0.716816	0.0622699	-0.0393762	24.1109	24.3632	23.8857	23.4592	23.407	23.634	25.9415	25.456	25.3211	25.4984	25.5573	25.5449
PF3D7_0730900	Plasmodium falciparum 3D7	EMP1-trafficking protein	PTP4	Previous IDs: MAL7P1.171	870	0	0.698737	0.090293	0.150066	0.57477	0.0982876	-0.110509	23.5641	23.8705	23.3272	23.6608	23.9139	23.6374	25.7679	25.5871	25.6073	25.388	25.6326	25.6103
PF3D7_0730900	Plasmodium falciparum 3D7	EMP1-trafficking protein	PTP4	Previous IDs: MAL7P1.171	958	0	0.0254028	0.953071	0.207912	0.118237	0.369777	-0.11883	25.4939	25.6856	25.3441	25.7089	25.7698	25.6686	29.2902	29.2481	29.3126	29.0684	29.1787	29.2474
PF3D7_0730900	Plasmodium falciparum 3D7	EMP1-trafficking protein	PTP4	Previous IDs: MAL7P1.171	399	0	NA	NA	NA	0.884182	0.0231875	0.0709669	NA	NA	NA	NA	NA	NA	24.8271	24.4383	24.2634	24.7004	24.3889	24.6524
PF3D7_0730900	Plasmodium falciparum 3D7	EMP1-trafficking protein	PTP4	Previous IDs: MAL7P1.171	628	0	0.832535	0.0472931	0.122754	0.868739	0.0243094	-0.0646347	20.8704	22.2442	21.7753	21.8915	21.4691	21.8977	25.6222	25.3294	25.2963	25.5109	25.2208	25.3224
PF3D7_0730900	Plasmodium falciparum 3D7	EMP1-trafficking protein	PTP4	Previous IDs: MAL7P1.171	1379	0	0.919939	0.0252054	-0.0101981	0.502354	0.1097	-0.0706714	22.9717	22.8801	23.1795	23.067	22.9179	23.0158	24.6996	25.0288	25.0428	24.9821	24.6436	24.9335
PF3D7_0730900	Plasmodium falciparum 3D7	EMP1-trafficking protein	PTP4	Previous IDs: MAL7P1.171	1887	0	4.93733e-06	3.63905	0.682528	0.0649464	0.523415	0.54334	22.8981	23.0029	23.0084	23.6713	23.5456	23.7401	25.3374	25.5468	25.2319	25.6762	25.8569	26.2129
PF3D7_0730900	Plasmodium falciparum 3D7	EMP1-trafficking protein	PTP4	Previous IDs: MAL7P1.171	1644	0	0.0700767	0.669106	-0.478407	0.682231	0.0743748	-0.245963	24.8235	24.93	24.7163	24.3772	24.1436	24.5138	25.6407	25.3747	25.3943	25.3876	25.0387	25.2455
PF3D7_0730900	Plasmodium falciparum 3D7	EMP1-trafficking protein	PTP4	Previous IDs: MAL7P1.171	1575	0	0.0180347	1.02256	1.14608	0.208494	0.265586	0.0983532	23.2609	22.2331	23.0091	24.0639	24.113	23.7645	25.126	25.1949	25.5732	25.3928	25.35	25.4464
PF3D7_0730900	Plasmodium falciparum 3D7	EMP1-trafficking protein	PTP4	Previous IDs: MAL7P1.171	569	0	0.102938	0.569169	-0.488529	0.851085	0.0288651	-0.0501453	24.0264	24.0277	23.5561	23.1339	23.262	23.7488	25.3766	24.8836	25.0064	24.9774	25.18	24.9587
PF3D7_0730900	Plasmodium falciparum 3D7	EMP1-trafficking protein	PTP4	Previous IDs: MAL7P1.171	1096	0	0.0730883	0.659031	0.447598	0.682377	0.0743748	-0.0426014	24.0424	23.8302	24.0297	24.6625	24.4004	24.1822	27.1097	27.3976	27.2644	27.3154	27.0323	27.2963
PF3D7_0730900	Plasmodium falciparum 3D7	EMP1-trafficking protein	PTP4	Previous IDs: MAL7P1.171	2063	0	NA	NA	NA	0.631099	0.081011	0.0863629	NA	NA	NA	NA	NA	NA	23.5519	24.0553	24.0309	24.1762	24.1196	23.6014
PF3D7_0730900	Plasmodium falciparum 3D7	EMP1-trafficking protein	PTP4	Previous IDs: MAL7P1.171	1655	0	0.138336	0.505129	-0.367745	0.923273	0.0162478	-0.171503	24.2096	24.1876	24.1469	24.0205	23.5297	23.8906	25.6622	25.586	25.3361	25.4199	25.2848	25.3651
PF3D7_0730900	Plasmodium falciparum 3D7	EMP1-trafficking protein	PTP4	Previous IDs: MAL7P1.171	1009	0	0.730532	0.079479	0.0778469	0.138354	0.323234	-0.444821	24.1894	24.1349	23.8597	24.4284	24.2294	23.7597	26.101	25.6775	26.0162	25.5405	25.2698	25.65
PF3D7_0730900	Plasmodium falciparum 3D7	EMP1-trafficking protein	PTP4	Previous IDs: MAL7P1.171	503	0	0.0823255	0.626328	-0.548824	0.67252	0.0743748	-0.0852556	22.7664	23.4984	22.5098	22.1923	22.3762	22.5596	24.6865	24.1644	24.3466	24.1977	24.4398	24.3042
PF3D7_0730900	Plasmodium falciparum 3D7	EMP1-trafficking protein	PTP4	Previous IDs: MAL7P1.171	1977	0	NA	NA	NA	0.456155	0.132123	0.496055	NA	NA	NA	NA	NA	NA	21.7027	22.7949	22.6247	22.8986	22.8981	22.8138
PF3D7_0730900	Plasmodium falciparum 3D7	EMP1-trafficking protein	PTP4	Previous IDs: MAL7P1.171	1400	0	0.000738893	1.97585	-0.0810339	0.790153	0.0429067	-0.146578	25.8226	25.691	25.8188	25.7828	25.7123	25.5942	25.5796	24.9831	24.6643	25.1853	24.5862	25.0159
PF3D7_0730900	Plasmodium falciparum 3D7	EMP1-trafficking protein	PTP4	Previous IDs: MAL7P1.171	1538	0	0.299177	0.313996	-0.0222872	0.159778	0.300924	-0.119497	23.9625	23.8298	23.6451	23.7921	23.8408	23.7377	25.8735	25.7951	25.8879	25.9308	25.5714	25.6958
PF3D7_0730900	Plasmodium falciparum 3D7	EMP1-trafficking protein	PTP4	Previous IDs: MAL7P1.171	2050	1	NA	NA	NA	0.0210514	0.793874	-1.71545	NA	NA	NA	NA	NA	NA	20.4814	20.8993	20.2589	17.9972	19.3958	19.1001
PF3D7_0730900	Plasmodium falciparum 3D7	EMP1-trafficking protein	PTP4	Previous IDs: MAL7P1.171	915	0	0.0108114	1.19029	1.00218	0.716223	0.0622699	0.0246026	24.4013	24.7154	24.6888	25.8357	25.5461	25.4302	27.2761	27.272	27.3632	27.3189	27.2298	27.4364
PF3D7_0730900	Plasmodium falciparum 3D7	EMP1-trafficking protein	PTP4	Previous IDs: MAL7P1.171	519	0	0.175291	0.437741	-0.161251	0.75395	0.0559994	0.0362625	24.28	24.5029	24.0931	24.0762	24.0686	24.2474	26.072	25.5031	25.552	25.64	25.9155	25.6804
PF3D7_0730900	Plasmodium falciparum 3D7	EMP1-trafficking protein	PTP4	Previous IDs: MAL7P1.171	1413	0	0.191122	0.417512	-0.231616	0.218708	0.262465	0.177742	23.582	23.3269	23.7844	23.4385	23.2149	23.3451	24.1631	24.2452	24.3618	24.6133	24.2744	24.4156
PF3D7_0730900	Plasmodium falciparum 3D7	EMP1-trafficking protein	PTP4	Previous IDs: MAL7P1.171	1514	0	0.00112964	1.8339	0.0847891	0.521707	0.103585	0.119419	20.883	20.9762	20.9641	20.6763	21.4953	20.9061	24.9325	25.1699	24.9658	25.1873	25.065	25.1742
PF3D7_0730900	Plasmodium falciparum 3D7	EMP1-trafficking protein	PTP4	Previous IDs: MAL7P1.171	892	0	0.269288	0.326939	0.472445	0.541234	0.0982876	0.0181396	24.3294	24.7051	24.5603	25.1864	24.9916	24.8341	26.387	26.3013	26.5298	26.4488	26.4462	26.3775
PF3D7_0730900	Plasmodium falciparum 3D7	EMP1-trafficking protein	PTP4	Previous IDs: MAL7P1.171	1859	0	0.00452081	1.46226	-1.4757	0.393382	0.150462	-0.235109	22.1175	22.0571	22.1644	20.3987	19.9927	21.5205	25.5087	25.6229	25.5798	25.4556	25.1214	25.4291
PF3D7_0730900	Plasmodium falciparum 3D7	EMP1-trafficking protein	PTP4	Previous IDs: MAL7P1.171	635	0	0.000467191	2.06426	-0.537897	0.340897	0.169799	0.0416661	22.8978	22.7708	22.7198	22.0669	22.1502	22.5576	26.1454	25.1935	25.6949	25.7082	25.8289	25.6217
PF3D7_0730900	Plasmodium falciparum 3D7	EMP1-trafficking protein	PTP4	Previous IDs: MAL7P1.171	613	0	0.123585	0.528756	-0.427089	0.503636	0.1097	0.345387	23.9446	24.2771	23.8907	23.4103	23.4444	23.9764	26.3143	25.6367	25.278	25.9981	26.1618	26.1051
PF3D7_0730900	Plasmodium falciparum 3D7	EMP1-trafficking protein	PTP4	Previous IDs: MAL7P1.171	2041	0	2.06766e-07	4.5911	0.993673	0.423561	0.140319	0.237101	22.51	22.6306	22.6422	23.6306	23.607	23.5262	25.8866	26.3312	25.6824	26.0908	26.0532	26.4674
PF3D7_0730900	Plasmodium falciparum 3D7	EMP1-trafficking protein	PTP4	Previous IDs: MAL7P1.171	1635	0	0.299177	0.313996	-0.0222872	0.0911855	0.437512	-0.154856	23.9625	23.8298	23.6451	23.7921	23.8408	23.7377	26.096	26.0377	26.0644	26.0799	25.7717	25.882
PF3D7_0730900	Plasmodium falciparum 3D7	EMP1-trafficking protein	PTP4	Previous IDs: MAL7P1.171	377	0	NA	NA	NA	0.884977	0.0231875	0.0667332	NA	NA	NA	NA	NA	NA	24.003	22.9711	23.7077	23.6992	23.6192	23.5637
PF3D7_0730900	Plasmodium falciparum 3D7	EMP1-trafficking protein	PTP4	Previous IDs: MAL7P1.171	804	0	0.288156	0.3176	0.232708	0.362688	0.165221	-0.131669	25.8294	26.0866	25.4763	25.9218	26.1964	25.9723	28.5593	28.4952	28.5464	28.199	28.4709	28.5361
PF3D7_0730900	Plasmodium falciparum 3D7	EMP1-trafficking protein	PTP4	Previous IDs: MAL7P1.171	936	0	0.288156	0.3176	0.232708	0.362688	0.165221	-0.131669	25.8294	26.0866	25.4763	25.9218	26.1964	25.9723	28.5593	28.4952	28.5464	28.199	28.4709	28.5361
PF3D7_0730900	Plasmodium falciparum 3D7	EMP1-trafficking protein	PTP4	Previous IDs: MAL7P1.171	1442	0	0.299177	0.313996	-0.0222872	0.159778	0.300924	-0.119497	23.9625	23.8298	23.6451	23.7921	23.8408	23.7377	25.8735	25.7951	25.8879	25.9308	25.5714	25.6958
PF3D7_0730900	Plasmodium falciparum 3D7	EMP1-trafficking protein	PTP4	Previous IDs: MAL7P1.171	1443	0	0.299177	0.313996	-0.0222872	0.0911855	0.437512	-0.154856	23.9625	23.8298	23.6451	23.7921	23.8408	23.7377	26.096	26.0377	26.0644	26.0799	25.7717	25.882
PF3D7_0730900	Plasmodium falciparum 3D7	EMP1-trafficking protein	PTP4	Previous IDs: MAL7P1.171	305	0	0.711401	0.0874404	-0.0396656	0.0716715	0.497713	-0.168034	23.8214	23.7173	23.9977	23.7917	23.7145	23.911	24.0348	24.0712	24.0569	23.7949	23.8857	23.9781
PF3D7_0730900	Plasmodium falciparum 3D7	EMP1-trafficking protein	PTP4	Previous IDs: MAL7P1.171	1175	0	0.138336	0.505129	-0.367745	0.923273	0.0162478	-0.171503	24.2096	24.1876	24.1469	24.0205	23.5297	23.8906	25.6622	25.586	25.3361	25.4199	25.2848	25.3651
PF3D7_0730900	Plasmodium falciparum 3D7	EMP1-trafficking protein	PTP4	Previous IDs: MAL7P1.171	767	0	0.0323167	0.874273	-0.194945	0.0477919	0.590556	-0.140413	23.2494	23.4876	23.2292	23.1748	23.0016	23.205	25.5983	25.206	25.4316	25.2292	25.365	25.2205
PF3D7_0730900	Plasmodium falciparum 3D7	EMP1-trafficking protein	PTP4	Previous IDs: MAL7P1.171	716	0	0.0254028	0.953071	0.207912	0.118237	0.369777	-0.11883	25.4939	25.6856	25.3441	25.7089	25.7698	25.6686	29.2902	29.2481	29.3126	29.0684	29.1787	29.2474
PF3D7_0730900	Plasmodium falciparum 3D7	EMP1-trafficking protein	PTP4	Previous IDs: MAL7P1.171	1559	0	0.138336	0.505129	-0.367745	0.923273	0.0162478	-0.171503	24.2096	24.1876	24.1469	24.0205	23.5297	23.8906	25.6622	25.586	25.3361	25.4199	25.2848	25.3651
PF3D7_0730900	Plasmodium falciparum 3D7	EMP1-trafficking protein	PTP4	Previous IDs: MAL7P1.171	774	0	0.0111658	1.18091	0.359914	0.0598389	0.542698	-0.0644006	23.9224	24.714	24.2559	24.7413	24.6831	24.5476	26.3344	25.9889	26.2806	26.0999	26.1973	26.1135
PF3D7_0730900	Plasmodium falciparum 3D7	EMP1-trafficking protein	PTP4	Previous IDs: MAL7P1.171	195	0	0.856983	0.041792	-0.0868822	0.000370342	1.91691	-1.0693	23.6142	24.6572	23.283	23.9437	23.4013	23.9488	27.2336	26.7646	26.9443	25.7212	26.0713	25.9421
PF3D7_0730900	Plasmodium falciparum 3D7	EMP1-trafficking protein	PTP4	Previous IDs: MAL7P1.171	1811	0	NA	NA	NA	0.724485	0.0614027	-0.130721	NA	NA	NA	NA	NA	NA	23.5052	23.6923	23.1137	23.4261	22.8771	23.6158
PF3D7_0730900	Plasmodium falciparum 3D7	EMP1-trafficking protein	PTP4	Previous IDs: MAL7P1.171	387	0	NA	NA	NA	0.261651	0.216425	0.150903	NA	NA	NA	NA	NA	NA	24.2889	24.0873	24.2036	24.428	24.4645	24.1401
PF3D7_0730900	Plasmodium falciparum 3D7	EMP1-trafficking protein	PTP4	Previous IDs: MAL7P1.171	1496	0	0.114563	0.546504	-0.391605	0.410555	0.143541	0.439111	23.7907	23.8012	23.9821	23.5443	23.3866	23.4682	24.4225	24.773	24.9208	25.1672	25.0786	25.1878
PF3D7_0730900	Plasmodium falciparum 3D7	EMP1-trafficking protein	PTP4	Previous IDs: MAL7P1.171	1898	0	0.00550334	1.40385	0.408779	0.00489207	1.15029	0.602734	22.619	22.6134	22.7479	23.0958	23.0001	23.1108	24.6483	24.7187	24.5705	25.0294	25.2554	25.4609
PF3D7_0730900	Plasmodium falciparum 3D7	EMP1-trafficking protein	PTP4	Previous IDs: MAL7P1.171	1883	1	NA	NA	NA	0.0210514	0.793874	-1.71545	NA	NA	NA	NA	NA	NA	20.4814	20.8993	20.2589	17.9972	19.3958	19.1001
PF3D7_0730900	Plasmodium falciparum 3D7	EMP1-trafficking protein	PTP4	Previous IDs: MAL7P1.171	1069	0	NA	NA	NA	0.64045	0.081011	-0.283621	NA	NA	NA	NA	NA	NA	23.9257	23.6324	22.8785	23.3668	22.313	23.906
PF3D7_0730900	Plasmodium falciparum 3D7	EMP1-trafficking protein	PTP4	Previous IDs: MAL7P1.171	1322	0	0.00435518	1.46909	0.593303	0.964126	0.00594325	0.00674972	22.1832	21.7615	22.1457	22.7878	22.4529	22.6296	24.7268	24.8741	25.1116	24.9668	24.8726	24.8933
PF3D7_0730900	Plasmodium falciparum 3D7	EMP1-trafficking protein	PTP4	Previous IDs: MAL7P1.171	333	0	0.0755637	0.651514	0.421375	0.899475	0.0192126	-0.0963762	21.4455	20.8865	21.166	21.712	21.4628	21.5874	24.0438	23.9246	23.5581	23.7235	23.5657	23.9481
PF3D7_0730900	Plasmodium falciparum 3D7	EMP1-trafficking protein	PTP4	Previous IDs: MAL7P1.171	783	0	0.116036	0.545775	0.430437	0.57252	0.0982876	0.00840671	25.5117	25.9074	25.6575	26.296	26.0887	25.9832	27.6837	27.5739	27.7922	27.7159	27.71	27.6492
PF3D7_0730900	Plasmodium falciparum 3D7	EMP1-trafficking protein	PTP4	Previous IDs: MAL7P1.171	1347	0	0.299177	0.313996	-0.0222872	0.0911855	0.437512	-0.154856	23.9625	23.8298	23.6451	23.7921	23.8408	23.7377	26.096	26.0377	26.0644	26.0799	25.7717	25.882
PF3D7_0730900	Plasmodium falciparum 3D7	EMP1-trafficking protein	PTP4	Previous IDs: MAL7P1.171	2059	0	0.00144989	1.75004	1.37127	0.505034	0.1097	0.328167	20.2872	20.8275	20.9472	22.3622	22.1266	21.687	25.4757	25.2766	26.0174	26.1653	26.0903	25.4985
PF3D7_0730900	Plasmodium falciparum 3D7	EMP1-trafficking protein	PTP4	Previous IDs: MAL7P1.171	532	0	NA	NA	NA	0.725621	0.0614027	0.0659336	NA	NA	NA	NA	NA	NA	24.5322	24.1433	23.8815	24.1615	24.3541	24.2393
PF3D7_0730900	Plasmodium falciparum 3D7	EMP1-trafficking protein	PTP4	Previous IDs: MAL7P1.171	1874	0	0.00596217	1.37833	-0.34992	0.409915	0.143541	0.0951368	21.8655	21.9339	21.8817	21.5663	21.1645	21.9006	24.1019	24.4107	24.0441	24.3738	23.9547	24.5136
PF3D7_0730900	Plasmodium falciparum 3D7	EMP1-trafficking protein	PTP4	Previous IDs: MAL7P1.171	893	0	0.116036	0.545775	0.430437	0.57252	0.0982876	0.00840671	25.5117	25.9074	25.6575	26.296	26.0887	25.9832	27.6837	27.5739	27.7922	27.7159	27.71	27.6492
PF3D7_0730900	Plasmodium falciparum 3D7	EMP1-trafficking protein	PTP4	Previous IDs: MAL7P1.171	1949	1	NA	NA	NA	0.0210514	0.793874	-1.71545	NA	NA	NA	NA	NA	NA	20.4814	20.8993	20.2589	17.9972	19.3958	19.1001
PF3D7_0730900	Plasmodium falciparum 3D7	EMP1-trafficking protein	PTP4	Previous IDs: MAL7P1.171	1376	0	0.166211	0.452662	-0.279603	0.388172	0.153686	-0.0885474	23.1078	23.0676	23.1001	22.9464	22.5675	22.9228	25.073	25.2372	25.2112	25.1853	24.9169	25.1535
PF3D7_0730900	Plasmodium falciparum 3D7	EMP1-trafficking protein	PTP4	Previous IDs: MAL7P1.171	650	0	0.000180014	2.35979	0.0870463	0.343162	0.168067	-0.0433364	22.8417	22.7721	22.8251	23.0646	22.9406	22.6947	25.4719	25.3114	25.2349	25.3882	25.248	25.2519
PF3D7_0730900	Plasmodium falciparum 3D7	EMP1-trafficking protein	PTP4	Previous IDs: MAL7P1.171	214	0	0.856983	0.041792	-0.0868822	0.000245977	1.96334	-0.879391	23.6142	24.6572	23.283	23.9437	23.4013	23.9488	25.8974	25.7145	25.8949	24.8829	25.0936	24.8921
PF3D7_0730900	Plasmodium falciparum 3D7	EMP1-trafficking protein	PTP4	Previous IDs: MAL7P1.171	1598	0	0.0530491	0.752993	-0.533192	0.275126	0.209201	0.262839	21.4547	21.6378	21.5841	20.6975	21.3502	21.0293	22.1643	22.2549	22.3599	22.3729	22.4336	22.761
PF3D7_0730900	Plasmodium falciparum 3D7	EMP1-trafficking protein	PTP4	Previous IDs: MAL7P1.171	629	0	0.832535	0.0472931	0.122754	0.883484	0.0231875	0.102537	20.8704	22.2442	21.7753	21.8915	21.4691	21.8977	25.53	24.5269	25.0542	25.2819	25.0398	25.0971
PF3D7_0730900	Plasmodium falciparum 3D7	EMP1-trafficking protein	PTP4	Previous IDs: MAL7P1.171	2085	0	NA	NA	NA	0.779791	0.0453849	-0.0418987	NA	NA	NA	NA	NA	NA	23.506	23.9147	23.5834	23.7523	23.9243	23.2018
PF3D7_0730900	Plasmodium falciparum 3D7	EMP1-trafficking protein	PTP4	Previous IDs: MAL7P1.171	1571	0	0.355296	0.256658	0.584715	0.304202	0.193288	0.0829513	22.5178	21.7675	22.3484	22.942	22.773	22.6728	24.4294	24.5506	24.7194	24.6838	24.5151	24.7494
PF3D7_0730900	Plasmodium falciparum 3D7	EMP1-trafficking protein	PTP4	Previous IDs: MAL7P1.171	1861	0	0.00199729	1.64602	-1.2112	0.46094	0.128523	-0.117329	20.8785	21.3033	21.1088	19.3837	19.5532	20.7201	24.6864	24.609	24.4388	24.4692	24.3668	24.5462
PF3D7_0730900	Plasmodium falciparum 3D7	EMP1-trafficking protein	PTP4	Previous IDs: MAL7P1.171	849	0	0.0209323	0.997008	0.0965335	0.162171	0.300924	-0.0693864	26.461	26.5626	26.2699	26.4905	26.5482	26.5445	30.1273	30.1037	30.1743	30.0191	30.0935	30.0846
PF3D7_0730900	Plasmodium falciparum 3D7	EMP1-trafficking protein	PTP4	Previous IDs: MAL7P1.171	1975	0	NA	NA	NA	0.631099	0.081011	0.0863629	NA	NA	NA	NA	NA	NA	23.5519	24.0553	24.0309	24.1762	24.1196	23.6014
PF3D7_0730900	Plasmodium falciparum 3D7	EMP1-trafficking protein	PTP4	Previous IDs: MAL7P1.171	2102	0	0.0030425	1.51832	0.424994	0.433969	0.135995	0.462235	22.8439	22.8964	23.0923	23.6051	23.4098	23.0927	21.5977	22.1798	21.6583	21.9908	22.1529	22.6788
PF3D7_0730900	Plasmodium falciparum 3D7	EMP1-trafficking protein	PTP4	Previous IDs: MAL7P1.171	453	0	0.437334	0.214069	0.262758	0.645331	0.0806024	0.129206	23.9361	24.3615	23.4049	23.9105	24.3227	24.2576	24.6566	24.3145	24.1455	24.3497	24.4646	24.6899
PF3D7_0730900	Plasmodium falciparum 3D7	EMP1-trafficking protein	PTP4	Previous IDs: MAL7P1.171	1771	0	0.0781253	0.639878	-0.435679	0.534764	0.100589	-0.0107795	24.2198	24.09	23.7472	23.5188	23.5612	23.67	25.3184	25.2514	25.4624	25.4676	25.1905	25.3417
PF3D7_0730900	Plasmodium falciparum 3D7	EMP1-trafficking protein	PTP4	Previous IDs: MAL7P1.171	1545	0	0.532476	0.164519	-0.172887	0.214672	0.263299	-0.300686	23.903	24.3333	23.7788	23.5483	24.2942	23.6538	25.702	25.5152	25.7626	25.7144	24.9942	25.369
PF3D7_0730900	Plasmodium falciparum 3D7	EMP1-trafficking protein	PTP4	Previous IDs: MAL7P1.171	2030	0	0.288511	0.3176	0.0479028	0.00402724	1.20819	0.358161	22.7946	22.6304	22.9093	22.6157	22.7546	23.1077	24.9467	25.5582	24.9401	25.3886	25.4946	25.6362
PF3D7_0730900	Plasmodium falciparum 3D7	EMP1-trafficking protein	PTP4	Previous IDs: MAL7P1.171	1799	0	NA	NA	NA	0.897957	0.0193312	0.157995	NA	NA	NA	NA	NA	NA	22.6561	21.7046	21.9306	22.4861	22.1503	22.1289
PF3D7_0730900	Plasmodium falciparum 3D7	EMP1-trafficking protein	PTP4	Previous IDs: MAL7P1.171	988	0	0.285489	0.3176	-0.512162	0.96595	0.00594325	-0.00220503	23.6457	23.4478	23.7197	23.4933	23.5067	22.2767	23.8066	23.2682	23.4741	23.4372	23.6187	23.4863
PF3D7_0730900	Plasmodium falciparum 3D7	EMP1-trafficking protein	PTP4	Previous IDs: MAL7P1.171	409	0	NA	NA	NA	0.430551	0.13779	-0.142584	NA	NA	NA	NA	NA	NA	21.7939	21.5125	21.2311	21.3884	21.3699	21.3514
PF3D7_0730900	Plasmodium falciparum 3D7	EMP1-trafficking protein	PTP4	Previous IDs: MAL7P1.171	914	0	0.0322836	0.874273	1.04419	0.685683	0.0737003	0.0343354	23.219	23.5132	23.5916	24.7261	24.4491	24.2812	25.9794	25.9994	26.1007	26.0518	25.9661	26.1647
PF3D7_0730900	Plasmodium falciparum 3D7	EMP1-trafficking protein	PTP4	Previous IDs: MAL7P1.171	651	0	0.000180014	2.35979	0.0870463	0.202649	0.26569	-0.060651	22.8417	22.7721	22.8251	23.0646	22.9406	22.6947	24.8461	24.6517	24.6576	24.7022	24.6227	24.6486
PF3D7_0730900	Plasmodium falciparum 3D7	EMP1-trafficking protein	PTP4	Previous IDs: MAL7P1.171	664	0	0.0552783	0.741173	0.158594	0.0269011	0.740864	-0.168178	23.71	25.0553	24.7972	24.6407	24.8504	24.5472	25.6034	25.4587	25.5737	25.3879	25.2516	25.4917
PF3D7_0730900	Plasmodium falciparum 3D7	EMP1-trafficking protein	PTP4	Previous IDs: MAL7P1.171	2081	0	7.10503e-06	3.49871	0.936198	0.646153	0.0806024	0.310172	22.7783	22.7102	22.7584	23.6622	23.732	23.6613	25.2236	25.1444	25.8766	26.0352	25.8408	25.299
PF3D7_0730900	Plasmodium falciparum 3D7	EMP1-trafficking protein	PTP4	Previous IDs: MAL7P1.171	2074	0	0.288511	0.3176	0.0479028	0.00402724	1.20819	0.358161	22.7946	22.6304	22.9093	22.6157	22.7546	23.1077	24.9467	25.5582	24.9401	25.3886	25.4946	25.6362
PF3D7_0731100	Plasmodium falciparum 3D7	EMP1-trafficking protein	PTP2	Previous IDs: MAL7P1.172	566	0	NA	NA	NA	0.702539	0.06528	-0.125117	NA	NA	NA	NA	NA	NA	21.3027	20.3869	20.8448	21.0189	20.5253	20.615
PF3D7_0731100	Plasmodium falciparum 3D7	EMP1-trafficking protein	PTP2	Previous IDs: MAL7P1.172	472	0	NA	NA	NA	NA	NA	NA	NA	NA	NA	NA	NA	NA	NA	NA	NA	NA	NA	NA
PF3D7_0731100	Plasmodium falciparum 3D7	EMP1-trafficking protein	PTP2	Previous IDs: MAL7P1.172	733	0	NA	NA	NA	NA	NA	NA	NA	NA	NA	NA	NA	NA	NA	NA	NA	NA	NA	NA
PF3D7_0731100	Plasmodium falciparum 3D7	EMP1-trafficking protein	PTP2	Previous IDs: MAL7P1.172	542	0	NA	NA	NA	0.873657	0.0243094	0.101947	NA	NA	NA	NA	NA	NA	22.1794	22.1301	22.0887	22.4346	21.5895	22.6801
PF3D7_0731100	Plasmodium falciparum 3D7	EMP1-trafficking protein	PTP2	Previous IDs: MAL7P1.172	362	0	NA	NA	NA	NA	NA	NA	NA	NA	NA	NA	NA	NA	NA	NA	NA	NA	NA	NA
PF3D7_0731100	Plasmodium falciparum 3D7	EMP1-trafficking protein	PTP2	Previous IDs: MAL7P1.172	113	0	NA	NA	NA	0.361841	0.165221	0.115266	NA	NA	NA	NA	NA	NA	22.0617	22.0599	22.058	21.981	22.3692	22.1751
PF3D7_0731100	Plasmodium falciparum 3D7	EMP1-trafficking protein	PTP2	Previous IDs: MAL7P1.172	724	0	NA	NA	NA	0.279778	0.207168	0.343692	NA	NA	NA	NA	NA	NA	22.4018	22.5808	22.0929	23.0312	22.246	22.8293
PF3D7_0731100	Plasmodium falciparum 3D7	EMP1-trafficking protein	PTP2	Previous IDs: MAL7P1.172	345	0	NA	NA	NA	0.503416	0.1097	0.156097	NA	NA	NA	NA	NA	NA	22.3815	22.3931	22.167	22.2457	22.4711	22.6931
PF3D7_0731100	Plasmodium falciparum 3D7	EMP1-trafficking protein	PTP2	Previous IDs: MAL7P1.172	132	0	NA	NA	NA	0.906201	0.017816	0.0887545	NA	NA	NA	NA	NA	NA	21.4663	21.5045	21.6948	22.1332	21.4757	21.3229
PF3D7_0731100	Plasmodium falciparum 3D7	EMP1-trafficking protein	PTP2	Previous IDs: MAL7P1.172	391	0	NA	NA	NA	0.165463	0.300197	-0.14335	NA	NA	NA	NA	NA	NA	23.7657	23.649	23.4516	23.3766	23.5396	23.5201
PF3D7_0731100	Plasmodium falciparum 3D7	EMP1-trafficking protein	PTP2	Previous IDs: MAL7P1.172	552	0	0.0799163	0.635161	-0.364782	0.857135	0.0270572	-0.0960989	22.1476	22.152	22.1841	21.5493	21.7554	22.0846	23.6351	23.382	23.574	23.4116	23.0616	23.8296
PF3D7_0731100	Plasmodium falciparum 3D7	EMP1-trafficking protein	PTP2	Previous IDs: MAL7P1.172	422	0	NA	NA	NA	NA	NA	NA	NA	NA	NA	NA	NA	NA	NA	NA	NA	NA	NA	NA
PF3D7_0731100	Plasmodium falciparum 3D7	EMP1-trafficking protein	PTP2	Previous IDs: MAL7P1.172	304	0	NA	NA	NA	NA	NA	NA	NA	NA	NA	NA	NA	NA	NA	NA	NA	NA	NA	NA
PF3D7_0731100	Plasmodium falciparum 3D7	EMP1-trafficking protein	PTP2	Previous IDs: MAL7P1.172	246	0	NA	NA	NA	0.00206027	1.38059	0.719495	NA	NA	NA	NA	NA	NA	22.0491	22.1001	22.1166	22.9544	22.8505	22.6193
PF3D7_0731100	Plasmodium falciparum 3D7	EMP1-trafficking protein	PTP2	Previous IDs: MAL7P1.172	222	0	NA	NA	NA	NA	NA	NA	NA	NA	NA	NA	NA	NA	NA	NA	NA	NA	NA	NA
PF3D7_0731100	Plasmodium falciparum 3D7	EMP1-trafficking protein	PTP2	Previous IDs: MAL7P1.172	604	0	NA	NA	NA	0.0547397	0.568312	0.119603	NA	NA	NA	NA	NA	NA	23.1046	23.0919	23.0982	23.2754	23.1307	23.2475
PF3D7_0731100	Plasmodium falciparum 3D7	EMP1-trafficking protein	PTP2	Previous IDs: MAL7P1.172	200	0	NA	NA	NA	0.169207	0.300197	0.438472	NA	NA	NA	NA	NA	NA	22.3557	21.9439	21.9505	22.0838	22.6637	22.818
PF3D7_0731100	Plasmodium falciparum 3D7	EMP1-trafficking protein	PTP2	Previous IDs: MAL7P1.172	342	0	NA	NA	NA	0.444902	0.132123	0.209202	NA	NA	NA	NA	NA	NA	23.8248	24.156	23.4208	23.8915	23.8761	24.2615
PF3D7_0731100	Plasmodium falciparum 3D7	EMP1-trafficking protein	PTP2	Previous IDs: MAL7P1.172	294	0	NA	NA	NA	NA	NA	NA	NA	NA	NA	NA	NA	NA	NA	NA	NA	NA	NA	NA
PF3D7_0731100	Plasmodium falciparum 3D7	EMP1-trafficking protein	PTP2	Previous IDs: MAL7P1.172	198	0	NA	NA	NA	0.169207	0.300197	0.438472	NA	NA	NA	NA	NA	NA	22.3557	21.9439	21.9505	22.0838	22.6637	22.818
PF3D7_0731100	Plasmodium falciparum 3D7	EMP1-trafficking protein	PTP2	Previous IDs: MAL7P1.172	734	0	NA	NA	NA	NA	NA	NA	NA	NA	NA	NA	NA	NA	NA	NA	NA	NA	NA	NA
PF3D7_0731100	Plasmodium falciparum 3D7	EMP1-trafficking protein	PTP2	Previous IDs: MAL7P1.172	438	0	NA	NA	NA	0.936468	0.0108265	0.0180153	NA	NA	NA	NA	NA	NA	22.7884	22.5073	22.5532	22.5185	22.3721	23.0124
PF3D7_0731100	Plasmodium falciparum 3D7	EMP1-trafficking protein	PTP2	Previous IDs: MAL7P1.172	397	0	NA	NA	NA	0.201417	0.26569	-0.302373	NA	NA	NA	NA	NA	NA	23.2799	23.0137	23.1215	22.5815	23.1275	22.7991
PF3D7_0731100	Plasmodium falciparum 3D7	EMP1-trafficking protein	PTP2	Previous IDs: MAL7P1.172	686	0	NA	NA	NA	0.000653946	1.68845	-0.2899	NA	NA	NA	NA	NA	NA	23.9831	24.0853	24.0342	23.7336	23.7443	23.7549
PF3D7_0731100	Plasmodium falciparum 3D7	EMP1-trafficking protein	PTP2	Previous IDs: MAL7P1.172	318	0	NA	NA	NA	0.678462	0.0743748	0.0732086	NA	NA	NA	NA	NA	NA	22.27	22.8115	22.4841	22.6859	22.5375	22.5618
PF3D7_0731300	Plasmodium falciparum 3D7	Plasmodium exported protein (PHISTb), unknown function	PfG174	Previous IDs: MAL7P1.174	310	0	0.0463178	0.78727	0.263243	NA	NA	NA	22.6351	22.5315	22.3964	22.8903	22.6782	22.7842	NA	NA	NA	NA	NA	NA
PF3D7_0731300	Plasmodium falciparum 3D7	Plasmodium exported protein (PHISTb), unknown function	PfG174	Previous IDs: MAL7P1.174	299	0	0.75362	0.0695004	0.131761	NA	NA	NA	20.0856	19.2694	20.1132	19.5993	20.5013	19.7628	NA	NA	NA	NA	NA	NA
PF3D7_0731300	Plasmodium falciparum 3D7	Plasmodium exported protein (PHISTb), unknown function	PfG174	Previous IDs: MAL7P1.174	317	0	0.115637	0.545775	0.433031	0.670081	0.0743748	-0.217515	23.2547	23.2986	23.3433	23.6136	23.4338	24.1484	23.6705	24.3604	23.435	24.0885	22.8459	23.8788
PF3D7_0731300	Plasmodium falciparum 3D7	Plasmodium exported protein (PHISTb), unknown function	PfG174	Previous IDs: MAL7P1.174	73	0	0.654483	0.110258	-0.0824656	0.295034	0.196736	-0.249621	20.8659	21.3488	21.2879	20.9677	21.0541	21.2335	21.4711	21.9286	21.5135	21.1142	21.4312	21.6189
PF3D7_0731300	Plasmodium falciparum 3D7	Plasmodium exported protein (PHISTb), unknown function	PfG174	Previous IDs: MAL7P1.174	313	0	0.0333657	0.863995	0.348137	0.670081	0.0743748	-0.217515	22.9449	22.9151	22.8699	23.2519	23.056	23.4663	23.6705	24.3604	23.435	24.0885	22.8459	23.8788
PF3D7_0731300	Plasmodium falciparum 3D7	Plasmodium exported protein (PHISTb), unknown function	PfG174	Previous IDs: MAL7P1.174	291	0	NA	NA	NA	NA	NA	NA	NA	NA	NA	NA	NA	NA	NA	NA	NA	NA	NA	NA
PF3D7_0731600	Plasmodium falciparum 3D7	acyl-CoA synthetase	ACS5	Previous IDs: PF07_0129	768	0	0.0462661	0.78727	0.318427	NA	NA	NA	20.1526	19.9396	20.2756	20.8539	20.7832	19.686	NA	NA	NA	NA	NA	NA
PF3D7_0731600	Plasmodium falciparum 3D7	acyl-CoA synthetase	ACS5	Previous IDs: PF07_0129	732	0	NA	NA	NA	NA	NA	NA	NA	NA	NA	NA	NA	NA	NA	NA	NA	NA	NA	NA
PF3D7_0731600	Plasmodium falciparum 3D7	acyl-CoA synthetase	ACS5	Previous IDs: PF07_0129	233	0	0.195324	0.414728	0.222125	NA	NA	NA	19.5375	19.2858	19.4117	19.4204	19.8471	19.6338	NA	NA	NA	NA	NA	NA
PF3D7_0731600	Plasmodium falciparum 3D7	acyl-CoA synthetase	ACS5	Previous IDs: PF07_0129	811	0	0.293487	0.313996	0.0379856	0.317211	0.180986	0.272335	23.7204	23.0275	22.4639	22.4573	23.0959	23.7725	22.2401	22.997	22.8561	22.9839	23.0551	22.8712
PF3D7_0731600	Plasmodium falciparum 3D7	acyl-CoA synthetase	ACS5	Previous IDs: PF07_0129	763	0	0.470459	0.193637	0.0286507	NA	NA	NA	19.0629	18.7916	18.5204	18.799	18.6736	18.9882	NA	NA	NA	NA	NA	NA
PF3D7_0731600	Plasmodium falciparum 3D7	acyl-CoA synthetase	ACS5	Previous IDs: PF07_0129	780	0	0.0869184	0.616369	-0.335224	NA	NA	NA	21.1097	20.9906	20.6614	20.4747	20.6959	20.5853	NA	NA	NA	NA	NA	NA
PF3D7_0731600	Plasmodium falciparum 3D7	acyl-CoA synthetase	ACS5	Previous IDs: PF07_0129	801	0	0.293487	0.313996	0.0379856	0.317211	0.180986	0.272335	23.7204	23.0275	22.4639	22.4573	23.0959	23.7725	22.2401	22.997	22.8561	22.9839	23.0551	22.8712
PF3D7_0731600	Plasmodium falciparum 3D7	acyl-CoA synthetase	ACS5	Previous IDs: PF07_0129	377	0	NA	NA	NA	NA	NA	NA	NA	NA	NA	NA	NA	NA	NA	NA	NA	NA	NA	NA
PF3D7_0731600	Plasmodium falciparum 3D7	acyl-CoA synthetase	ACS5	Previous IDs: PF07_0129	775	0	0.0869184	0.616369	-0.335224	NA	NA	NA	21.1097	20.9906	20.6614	20.4747	20.6959	20.5853	NA	NA	NA	NA	NA	NA
PF3D7_0801000	Plasmodium falciparum 3D7	Plasmodium exported protein (PHISTc)	N/A	Previous IDs: PF08_0137	1065	0	0.0630129	0.698213	3.83773	0.123476	0.358537	-2.16238	18.5202	18.0404	19.7186	19.7634	24.0435	23.9855	23.6351	23.9252	24.2464	21.7732	19.8733	23.6731
PF3D7_0801000	Plasmodium falciparum 3D7	Plasmodium exported protein (PHISTc)	N/A	Previous IDs: PF08_0137	166	1	0.770415	0.0645021	-0.0352656	0.535867	0.100589	-0.131631	24.9191	24.9442	24.6981	24.9038	24.8961	24.6556	24.1757	24.156	24.435	24.3413	23.783	24.2475
PF3D7_0801000	Plasmodium falciparum 3D7	Plasmodium exported protein (PHISTc)	N/A	Previous IDs: PF08_0137	461	0	0.0909905	0.599721	-0.00832556	0.605635	0.0874265	-0.120511	21.1961	21.5181	21.5958	21.5191	21.2092	21.5567	23.2386	23.7617	23.7626	23.6108	23.2155	23.575
PF3D7_0801000	Plasmodium falciparum 3D7	Plasmodium exported protein (PHISTc)	N/A	Previous IDs: PF08_0137	928	0	NA	NA	NA	NA	NA	NA	NA	NA	NA	NA	NA	NA	NA	NA	NA	NA	NA	NA
PF3D7_0801000	Plasmodium falciparum 3D7	Plasmodium exported protein (PHISTc)	N/A	Previous IDs: PF08_0137	491	0	0.287035	0.3176	-0.0354422	0.354534	0.165221	-0.795093	24.1341	23.7317	23.9014	23.8761	23.8647	23.92	23.8807	23.6172	24.2814	22.3922	23.33	23.6718
PF3D7_0801000	Plasmodium falciparum 3D7	Plasmodium exported protein (PHISTc)	N/A	Previous IDs: PF08_0137	156	0	0.00758462	1.3054	0.294201	0.190036	0.279515	-0.218475	23.6431	24.388	24.4405	24.3964	24.5562	24.4016	26.7661	27.0587	27.1179	26.5973	26.8861	26.8039
PF3D7_0801000	Plasmodium falciparum 3D7	Plasmodium exported protein (PHISTc)	N/A	Previous IDs: PF08_0137	177	0	NA	NA	NA	NA	NA	NA	NA	NA	NA	NA	NA	NA	NA	NA	NA	NA	NA	NA
PF3D7_0801000	Plasmodium falciparum 3D7	Plasmodium exported protein (PHISTc)	N/A	Previous IDs: PF08_0137	505	0	0.42305	0.22026	0.0702844	0.0531875	0.571159	-0.342781	27.6366	27.6628	27.6415	27.5611	27.8082	27.7825	27.1778	27.5808	27.3419	27.0258	27.105	26.9414
PF3D7_0801000	Plasmodium falciparum 3D7	Plasmodium exported protein (PHISTc)	N/A	Previous IDs: PF08_0137	492	0	0.265512	0.330877	-0.0848022	0.426368	0.13942	-0.851021	25.6451	25.6616	25.5216	25.4498	25.571	25.5532	25.0143	24.7679	25.3042	23.4194	24.3051	24.8087
PF3D7_0801000	Plasmodium falciparum 3D7	Plasmodium exported protein (PHISTc)	N/A	Previous IDs: PF08_0137	179	0	NA	NA	NA	NA	NA	NA	NA	NA	NA	NA	NA	NA	NA	NA	NA	NA	NA	NA
PF3D7_0801000	Plasmodium falciparum 3D7	Plasmodium exported protein (PHISTc)	N/A	Previous IDs: PF08_0137	986	0	0.250817	0.347467	0.266278	0.736074	0.0602819	-0.0869247	25.9882	26.0241	26.2671	26.5504	26.5244	26.0036	26.4254	26.9988	27.2342	26.8217	26.7963	26.7796
PF3D7_0801000	Plasmodium falciparum 3D7	Plasmodium exported protein (PHISTc)	N/A	Previous IDs: PF08_0137	454	0	0.018185	1.021	-0.491458	NA	NA	NA	22.6255	23.2091	22.1583	22.1462	22.1316	22.2406	NA	NA	NA	NA	NA	NA
PF3D7_0801000	Plasmodium falciparum 3D7	Plasmodium exported protein (PHISTc)	N/A	Previous IDs: PF08_0137	1066	0	NA	NA	NA	0.402695	0.146172	-0.277041	NA	NA	NA	NA	NA	NA	23.049	22.4747	22.9548	22.1242	22.9434	22.5798
PF3D7_0801000	Plasmodium falciparum 3D7	Plasmodium exported protein (PHISTc)	N/A	Previous IDs: PF08_0137	165	1	0.770415	0.0645021	-0.0352656	0.535867	0.100589	-0.131631	24.9191	24.9442	24.6981	24.9038	24.8961	24.6556	24.1757	24.156	24.435	24.3413	23.783	24.2475
PF3D7_0801000	Plasmodium falciparum 3D7	Plasmodium exported protein (PHISTc)	N/A	Previous IDs: PF08_0137	156	1	0.849041	0.042497	0.0213828	0.516654	0.104411	-0.161008	24.9567	25.125	24.8732	24.9319	25.1515	24.9356	24.5747	24.6417	24.9812	24.623	24.4885	24.6031
PF3D7_0801000	Plasmodium falciparum 3D7	Plasmodium exported protein (PHISTc)	N/A	Previous IDs: PF08_0137	479	0	0.0996087	0.575277	-0.304553	0.474724	0.119438	-0.219159	23.7368	23.6813	23.2679	23.1425	23.1609	23.4689	23.2869	23.6027	23.6174	23.3784	23.3384	23.1327
PF3D7_0801000	Plasmodium falciparum 3D7	Plasmodium exported protein (PHISTc)	N/A	Previous IDs: PF08_0137	485	0	0.287035	0.3176	-0.0354422	0.354534	0.165221	-0.795093	24.1341	23.7317	23.9014	23.8761	23.8647	23.92	23.8807	23.6172	24.2814	22.3922	23.33	23.6718
PF3D7_0801000	Plasmodium falciparum 3D7	Plasmodium exported protein (PHISTc)	N/A	Previous IDs: PF08_0137	488	0	0.249173	0.348227	-0.0521731	0.40971	0.143541	-0.523005	23.8094	23.5297	23.4022	23.5247	23.4993	23.5608	23.0238	23.232	23.5254	22.3766	22.8963	22.9393
PF3D7_0801000	Plasmodium falciparum 3D7	Plasmodium exported protein (PHISTc)	N/A	Previous IDs: PF08_0137	436	0	0.949727	0.0157349	0.0237611	0.366208	0.162115	-0.421385	25.1414	25.7953	24.5997	25.0572	25.2304	25.3201	24.7552	24.419	25.4665	24.9602	24.4067	24.0097
PF3D7_0801000	Plasmodium falciparum 3D7	Plasmodium exported protein (PHISTc)	N/A	Previous IDs: PF08_0137	166	0	0.0363813	0.838147	0.139518	0.644115	0.0806024	-0.0966847	22.3937	23.1966	23.045	22.9861	23.1028	22.9649	23.4028	23.4294	23.196	23.1122	23.601	23.0249
PF3D7_0801000	Plasmodium falciparum 3D7	Plasmodium exported protein (PHISTc)	N/A	Previous IDs: PF08_0137	473	0	0.240717	0.357377	0.116759	0.71975	0.0622699	-0.0948414	20.7975	20.5516	20.6952	20.6204	20.8073	20.9669	20.9564	21.7421	21.5902	21.2299	21.3908	21.3835
PF3D7_0801000	Plasmodium falciparum 3D7	Plasmodium exported protein (PHISTc)	N/A	Previous IDs: PF08_0137	165	0	0.038048	0.827329	0.345834	0.091291	0.437512	-0.300495	21.6628	22.7168	22.7902	22.6848	22.871	22.6516	22.232	22.3083	22.4502	22.1336	22.1646	21.7908
PF3D7_0801000	Plasmodium falciparum 3D7	Plasmodium exported protein (PHISTc)	N/A	Previous IDs: PF08_0137	962	0	NA	NA	NA	0.714189	0.0622699	0.0768986	NA	NA	NA	NA	NA	NA	20.8193	21.011	21.4332	21.184	21.0294	21.2807
PF3D7_0801000	Plasmodium falciparum 3D7	Plasmodium exported protein (PHISTc)	N/A	Previous IDs: PF08_0137	184	0	0.772385	0.0645021	-0.113587	NA	NA	NA	22.3722	22.7573	22.5648	22.5173	21.815	23.0212	NA	NA	NA	NA	NA	NA
PF3D7_0802200	Plasmodium falciparum 3D7	1-cys peroxiredoxin	1-CysPxn	Previous IDs: PF08_0131	179	0	0.556616	0.152248	-0.134464	NA	NA	NA	22.8161	22.2292	22.5226	22.1789	22.3779	22.6077	NA	NA	NA	NA	NA	NA
PF3D7_0802200	Plasmodium falciparum 3D7	1-cys peroxiredoxin	1-CysPxn	Previous IDs: PF08_0131	183	0	0.556616	0.152248	-0.134464	NA	NA	NA	22.8161	22.2292	22.5226	22.1789	22.3779	22.6077	NA	NA	NA	NA	NA	NA
PF3D7_0830500	Plasmodium falciparum 3D7	sporozoite and liver stage tryptophan-rich protein, putative	TryThrA	Previous IDs: PF08_0003	616	0	NA	NA	NA	NA	NA	NA	NA	NA	NA	NA	NA	NA	NA	NA	NA	NA	NA	NA
PF3D7_0830500	Plasmodium falciparum 3D7	sporozoite and liver stage tryptophan-rich protein, putative	TryThrA	Previous IDs: PF08_0003	619	0	NA	NA	NA	NA	NA	NA	NA	NA	NA	NA	NA	NA	NA	NA	NA	NA	NA	NA
PF3D7_0830500	Plasmodium falciparum 3D7	sporozoite and liver stage tryptophan-rich protein, putative	TryThrA	Previous IDs: PF08_0003	564	0	NA	NA	NA	NA	NA	NA	NA	NA	NA	NA	NA	NA	NA	NA	NA	NA	NA	NA
PF3D7_0830500	Plasmodium falciparum 3D7	sporozoite and liver stage tryptophan-rich protein, putative	TryThrA	Previous IDs: PF08_0003	580	0	0.00192726	1.65417	1.30034	NA	NA	NA	21.8152	21.6928	21.9327	22.9305	23.4444	22.9667	NA	NA	NA	NA	NA	NA
PF3D7_0830500	Plasmodium falciparum 3D7	sporozoite and liver stage tryptophan-rich protein, putative	TryThrA	Previous IDs: PF08_0003	588	0	0.00192726	1.65417	1.30034	NA	NA	NA	21.8152	21.6928	21.9327	22.9305	23.4444	22.9667	NA	NA	NA	NA	NA	NA
PF3D7_0830500	Plasmodium falciparum 3D7	sporozoite and liver stage tryptophan-rich protein, putative	TryThrA	Previous IDs: PF08_0003	425	0	0.0847608	0.622931	0.364401	0.187141	0.282634	0.770199	23.4925	23.5473	23.0937	23.8766	23.6331	23.717	23.7386	22.7539	24.001	23.6735	24.6487	24.4819
PF3D7_0830500	Plasmodium falciparum 3D7	sporozoite and liver stage tryptophan-rich protein, putative	TryThrA	Previous IDs: PF08_0003	603	0	NA	NA	NA	NA	NA	NA	NA	NA	NA	NA	NA	NA	NA	NA	NA	NA	NA	NA
PF3D7_0831000	Plasmodium falciparum 3D7	Plasmodium exported protein (PHISTb), unknown function	GEXP09	Previous IDs: MAL8P1.2	136	0	0.222544	0.376064	-0.8485	NA	NA	NA	21.5871	20.4559	21.0215	21.0201	20.173	19.3259	NA	NA	NA	NA	NA	NA
PF3D7_0831300	Plasmodium falciparum 3D7	Plasmodium exported protein, unknown function	GEXP13	Previous IDs: MAL8P1.205	479	0	NA	NA	NA	NA	NA	NA	NA	NA	NA	NA	NA	NA	NA	NA	NA	NA	NA	NA
PF3D7_0831300	Plasmodium falciparum 3D7	Plasmodium exported protein, unknown function	GEXP13	Previous IDs: MAL8P1.205	311	0	0.599138	0.130746	0.185308	0.795491	0.0426907	0.0723719	21.8751	22.2069	21.3178	22.3677	21.8677	21.7203	22.9437	22.8229	23.2614	23.534	22.8637	22.8475
PF3D7_0831300	Plasmodium falciparum 3D7	Plasmodium exported protein, unknown function	GEXP13	Previous IDs: MAL8P1.205	314	0	0.599138	0.130746	0.185308	0.0177299	0.793874	0.53803	21.8751	22.2069	21.3178	22.3677	21.8677	21.7203	22.5006	22.3648	22.7349	23.1827	23.0773	22.9543
PF3D7_0831400	Plasmodium falciparum 3D7	Plasmodium exported protein, unknown function	N/A	Previous IDs: MAL8P1.206	177	0	0.86705	0.0412335	0.0725822	NA	NA	NA	21.4775	21.8146	21.1404	22.146	21.5933	20.911	NA	NA	NA	NA	NA	NA
PF3D7_0831400	Plasmodium falciparum 3D7	Plasmodium exported protein, unknown function	N/A	Previous IDs: MAL8P1.206	173	0	0.283616	0.3176	0.382051	NA	NA	NA	23.1546	22.1929	22.3704	23.0931	22.7867	22.9843	NA	NA	NA	NA	NA	NA
PF3D7_0831400	Plasmodium falciparum 3D7	Plasmodium exported protein, unknown function	N/A	Previous IDs: MAL8P1.206	66	0	NA	NA	NA	NA	NA	NA	NA	NA	NA	NA	NA	NA	NA	NA	NA	NA	NA	NA
PF3D7_0831700	Plasmodium falciparum 3D7	heat shock protein 70	HSP70x	Previous IDs: MAL7P1.228	350	0	0.00901624	1.24731	-0.732454	NA	NA	NA	20.6793	20.9153	20.4434	20.0754	19.8236	19.9417	NA	NA	NA	NA	NA	NA
PF3D7_0831700	Plasmodium falciparum 3D7	heat shock protein 70	HSP70x	Previous IDs: MAL7P1.228	590	0	NA	NA	NA	0.0127503	0.881584	0.437939	NA	NA	NA	NA	NA	NA	20.4194	20.712	20.6604	20.9397	21.0778	21.0881
PF3D7_0831700	Plasmodium falciparum 3D7	heat shock protein 70	HSP70x	Previous IDs: MAL7P1.228	543	0	0.398095	0.232591	-0.0470522	NA	NA	NA	21.9193	22.0331	21.9045	21.8589	21.9579	21.8988	NA	NA	NA	NA	NA	NA
PF3D7_0831700	Plasmodium falciparum 3D7	heat shock protein 70	HSP70x	Previous IDs: MAL7P1.228	528	0	NA	NA	NA	NA	NA	NA	NA	NA	NA	NA	NA	NA	NA	NA	NA	NA	NA	NA
PF3D7_0831700	Plasmodium falciparum 3D7	heat shock protein 70	HSP70x	Previous IDs: MAL7P1.228	353	0	0.00901624	1.24731	-0.732454	NA	NA	NA	20.6793	20.9153	20.4434	20.0754	19.8236	19.9417	NA	NA	NA	NA	NA	NA
PF3D7_0831700	Plasmodium falciparum 3D7	heat shock protein 70	HSP70x	Previous IDs: MAL7P1.228	652	0	0.00257242	1.5673	2.14097	0.326591	0.178994	0.139752	22.4161	21.7897	22.1634	24.4412	24.445	23.906	26.6964	26.9453	26.9174	27.1778	26.8483	26.9522
PF3D7_0831700	Plasmodium falciparum 3D7	heat shock protein 70	HSP70x	Previous IDs: MAL7P1.228	538	0	0.705419	0.0879099	-0.0567956	0.626609	0.0811337	0.0969919	22.5307	22.3135	22.7827	22.4974	22.538	22.4211	23.2547	23.5679	23.7513	23.4288	23.6131	23.823
PF3D7_0831700	Plasmodium falciparum 3D7	heat shock protein 70	HSP70x	Previous IDs: MAL7P1.228	189	0	0.172856	0.441551	-0.547289	NA	NA	NA	21.2114	22.1329	21.5639	21.4453	21.0362	20.7849	NA	NA	NA	NA	NA	NA
PF3D7_0831700	Plasmodium falciparum 3D7	heat shock protein 70	HSP70x	Previous IDs: MAL7P1.228	359	0	NA	NA	NA	NA	NA	NA	NA	NA	NA	NA	NA	NA	NA	NA	NA	NA	NA	NA
PF3D7_0900800	Plasmodium falciparum 3D7	erythrocyte membrane protein 1 (PfEMP1), exon 2, pseudogene	VAR	Previous IDs: PFI0040c	343	0	0.284924	0.3176	-0.150973	0.0256237	0.756533	0.494752	20.3279	20.5377	20.4818	20.2982	20.1161	20.4802	21.7263	21.5665	22.0458	22.2464	22.3183	22.2581
PF3D7_0900800	Plasmodium falciparum 3D7	erythrocyte membrane protein 1 (PfEMP1), exon 2, pseudogene	VAR	Previous IDs: PFI0040c	349	0	NA	NA	NA	0.719752	0.0622699	0.114813	NA	NA	NA	NA	NA	NA	20.1403	20.7939	19.7747	20.3565	20.3457	20.3511
PF3D7_0900800	Plasmodium falciparum 3D7	erythrocyte membrane protein 1 (PfEMP1), exon 2, pseudogene	VAR	Previous IDs: PFI0040c	303	0	NA	NA	NA	NA	NA	NA	NA	NA	NA	NA	NA	NA	NA	NA	NA	NA	NA	NA
PF3D7_0901800	Plasmodium falciparum 3D7	Plasmodium exported protein, unknown function	N/A	Previous IDs: PFI0086w	164	0	NA	NA	NA	NA	NA	NA	NA	NA	NA	NA	NA	NA	NA	NA	NA	NA	NA	NA
PF3D7_0902000	Plasmodium falciparum 3D7	serine/threonine protein kinase, FIKK family	FIKK9.1	Previous IDs: PFI0095c	203	0	0.126276	0.52314	-0.134112	0.00119421	1.47807	0.422525	23.9862	23.8693	24.0232	23.7322	23.9115	23.8325	21.151	21.1699	21.0761	21.5882	21.4702	21.6063
PF3D7_0905400	Plasmodium falciparum 3D7	high molecular weight rhoptry protein 3	RhopH3	Previous IDs: PFI0265c	788	0	0.0976427	0.580744	0.195864	0.873875	0.0243094	-0.0189214	23.194	23.3547	23.6941	23.4197	23.6235	23.7872	23.2708	23.4603	23.6329	23.4765	23.4744	23.3564
PF3D7_0905400	Plasmodium falciparum 3D7	high molecular weight rhoptry protein 3	RhopH3	Previous IDs: PFI0265c	519	0	NA	NA	NA	NA	NA	NA	NA	NA	NA	NA	NA	NA	NA	NA	NA	NA	NA	NA
PF3D7_0905400	Plasmodium falciparum 3D7	high molecular weight rhoptry protein 3	RhopH3	Previous IDs: PFI0265c	852	1	0.00412665	1.47975	2.00886	NA	NA	NA	18.7043	18.9819	19.4056	20.9065	20.648	21.5639	NA	NA	NA	NA	NA	NA
PF3D7_0905400	Plasmodium falciparum 3D7	high molecular weight rhoptry protein 3	RhopH3	Previous IDs: PFI0265c	846	0	0.00126636	1.79426	-0.874643	0.0035236	1.21244	-1.17025	23.3335	23.5921	23.6061	22.4949	22.6316	22.7813	23.4619	23.6791	24.5752	22.8713	22.7841	22.55
PF3D7_0905400	Plasmodium falciparum 3D7	high molecular weight rhoptry protein 3	RhopH3	Previous IDs: PFI0265c	719	0	NA	NA	NA	NA	NA	NA	NA	NA	NA	NA	NA	NA	NA	NA	NA	NA	NA	NA
PF3D7_0905400	Plasmodium falciparum 3D7	high molecular weight rhoptry protein 3	RhopH3	Previous IDs: PFI0265c	782	0	0.851003	0.042497	0.123852	0.169144	0.300197	0.313622	22.8389	23.5025	22.4898	22.9573	23.1834	23.0621	22.4969	22.2266	22.3615	22.5286	22.4827	23.0145
PF3D7_0905400	Plasmodium falciparum 3D7	high molecular weight rhoptry protein 3	RhopH3	Previous IDs: PFI0265c	852	0	5.84537e-07	4.33165	-1.34002	0.000291816	1.93443	-1.47651	23.5269	23.7197	23.6971	22.2833	22.2169	22.4234	22.898	22.9151	23.6165	21.789	22.0076	21.2034
PF3D7_0905400	Plasmodium falciparum 3D7	high molecular weight rhoptry protein 3	RhopH3	Previous IDs: PFI0265c	846	1	0.00412665	1.47975	2.00886	NA	NA	NA	18.7043	18.9819	19.4056	20.9065	20.648	21.5639	NA	NA	NA	NA	NA	NA
PF3D7_0905400	Plasmodium falciparum 3D7	high molecular weight rhoptry protein 3	RhopH3	Previous IDs: PFI0265c	856	0	0.0522514	0.754066	-0.917135	NA	NA	NA	20.7885	21.1943	21.9334	20.4159	20.3606	20.3883	NA	NA	NA	NA	NA	NA
PF3D7_0905400	Plasmodium falciparum 3D7	high molecular weight rhoptry protein 3	RhopH3	Previous IDs: PFI0265c	772	0	NA	NA	NA	NA	NA	NA	NA	NA	NA	NA	NA	NA	NA	NA	NA	NA	NA	NA
PF3D7_0909900	Plasmodium falciparum 3D7	helicase SKI2W, putative	N/A	Previous IDs: PFI0480w	662	1	NA	NA	NA	NA	NA	NA	NA	NA	NA	NA	NA	NA	NA	NA	NA	NA	NA	NA
PF3D7_0909900	Plasmodium falciparum 3D7	helicase SKI2W, putative	N/A	Previous IDs: PFI0480w	675	1	NA	NA	NA	NA	NA	NA	NA	NA	NA	NA	NA	NA	NA	NA	NA	NA	NA	NA
PF3D7_0909900	Plasmodium falciparum 3D7	helicase SKI2W, putative	N/A	Previous IDs: PFI0480w	659	1	NA	NA	NA	NA	NA	NA	NA	NA	NA	NA	NA	NA	NA	NA	NA	NA	NA	NA
PF3D7_0910200	Plasmodium falciparum 3D7	conserved Plasmodium protein, unknown function	N/A	Previous IDs: PFI0495w	436	0	0.642122	0.116458	-0.0448189	0.086252	0.444749	-0.368128	24.6248	24.6628	24.7139	24.7697	24.6237	24.4735	24.9831	25.0282	25.3248	24.4997	24.8761	24.8558
PF3D7_0915400	Plasmodium falciparum 3D7	ATP-dependent 6-phosphofructokinase	PFK9	Previous IDs: PFI0755c	21	0	NA	NA	NA	NA	NA	NA	NA	NA	NA	NA	NA	NA	NA	NA	NA	NA	NA	NA
PF3D7_0924600	Plasmodium falciparum 3D7	conserved Plasmodium protein, unknown function	N/A	Previous IDs: PFI1210w	866	0	NA	NA	NA	0.954666	0.00784794	0.0305786	NA	NA	NA	NA	NA	NA	24.8711	24.052	25.4526	24.2482	24.9541	25.265
PF3D7_0929400	Plasmodium falciparum 3D7	high molecular weight rhoptry protein 2	RhopH2	Previous IDs: PFI1445w	313	0	NA	NA	NA	NA	NA	NA	NA	NA	NA	NA	NA	NA	NA	NA	NA	NA	NA	NA
PF3D7_0930300	Plasmodium falciparum 3D7	merozoite surface protein 1	MSP1	Previous IDs: PFI1475w	1214	1	NA	NA	NA	NA	NA	NA	NA	NA	NA	NA	NA	NA	NA	NA	NA	NA	NA	NA
PF3D7_0930300	Plasmodium falciparum 3D7	merozoite surface protein 1	MSP1	Previous IDs: PFI1475w	1226	1	NA	NA	NA	NA	NA	NA	NA	NA	NA	NA	NA	NA	NA	NA	NA	NA	NA	NA
PF3D7_0935900	Plasmodium falciparum 3D7	ring-exported protein 1	REX1	Previous IDs: PFI1735c	696	0	0.00553508	1.40385	3.0549	NA	NA	NA	19.0659	18.3713	17.9172	22.4079	21.0885	21.0228	NA	NA	NA	NA	NA	NA
PF3D7_0935900	Plasmodium falciparum 3D7	ring-exported protein 1	REX1	Previous IDs: PFI1735c	704	0	0.00553508	1.40385	3.0549	NA	NA	NA	19.0659	18.3713	17.9172	22.4079	21.0885	21.0228	NA	NA	NA	NA	NA	NA
PF3D7_0935900	Plasmodium falciparum 3D7	ring-exported protein 1	REX1	Previous IDs: PFI1735c	479	0	NA	NA	NA	0.809965	0.0381374	-0.0267081	NA	NA	NA	NA	NA	NA	21.4878	21.3058	21.2745	21.4483	21.3624	21.1774
PF3D7_0935900	Plasmodium falciparum 3D7	ring-exported protein 1	REX1	Previous IDs: PFI1735c	87	0	0.374409	0.244093	-0.0849222	NA	NA	NA	22.2118	22.4601	22.3877	22.3372	22.1912	22.2763	NA	NA	NA	NA	NA	NA
PF3D7_0935900	Plasmodium falciparum 3D7	ring-exported protein 1	REX1	Previous IDs: PFI1735c	439	0	NA	NA	NA	0.809965	0.0381374	-0.0267081	NA	NA	NA	NA	NA	NA	21.4878	21.3058	21.2745	21.4483	21.3624	21.1774
PF3D7_0935900	Plasmodium falciparum 3D7	ring-exported protein 1	REX1	Previous IDs: PFI1735c	559	0	NA	NA	NA	0.809965	0.0381374	-0.0267081	NA	NA	NA	NA	NA	NA	21.4878	21.3058	21.2745	21.4483	21.3624	21.1774
PF3D7_0935900	Plasmodium falciparum 3D7	ring-exported protein 1	REX1	Previous IDs: PFI1735c	688	0	NA	NA	NA	0.840045	0.0332642	0.0361117	NA	NA	NA	NA	NA	NA	20.6441	20.5641	20.484	20.2785	20.7413	20.7807
PF3D7_0935900	Plasmodium falciparum 3D7	ring-exported protein 1	REX1	Previous IDs: PFI1735c	519	0	NA	NA	NA	0.809965	0.0381374	-0.0267081	NA	NA	NA	NA	NA	NA	21.4878	21.3058	21.2745	21.4483	21.3624	21.1774
PF3D7_0935900	Plasmodium falciparum 3D7	ring-exported protein 1	REX1	Previous IDs: PFI1735c	624	0	0.122526	0.529689	0.511131	NA	NA	NA	19.6195	19.93	20.372	20.7733	20.3296	20.3519	NA	NA	NA	NA	NA	NA
PF3D7_0936300	Plasmodium falciparum 3D7	ring-exported protein 3	REX3	Previous IDs: PFI1755c	129	0	0.00883816	1.24901	0.706207	0.650857	0.0803184	-0.0504447	23.6824	23.8809	23.6409	24.588	24.3901	24.3447	23.1563	23.0087	22.9407	22.4229	23.5491	22.9824
PF3D7_0936800	Plasmodium falciparum 3D7	Plasmodium exported protein (PHISTc), unknown function	N/A	Previous IDs: PFI1780w	84	0	0.0521095	0.754066	-0.279082	0.559866	0.0982876	-0.362165	20.8802	20.5763	20.8088	20.5756	20.2359	20.6166	21.0092	21.6377	22.2662	22.007	20.4865	21.3331
PF3D7_0936800	Plasmodium falciparum 3D7	Plasmodium exported protein (PHISTc), unknown function	N/A	Previous IDs: PFI1780w	322	0	0.29045	0.315339	0.26319	0.00185214	1.41241	-0.00813681	21.0212	20.8329	21.5573	21.6299	21.5355	21.0356	19.7348	20.2772	20.2207	20.1398	20.0418	20.0266
PF3D7_0936800	Plasmodium falciparum 3D7	Plasmodium exported protein (PHISTc), unknown function	N/A	Previous IDs: PFI1780w	267	0	0.821448	0.0510144	-0.133874	0.795077	0.0426907	0.0647769	25.6362	26.0674	24.9328	25.7374	25.4607	25.0366	24.1851	23.9156	23.499	24.0258	24.0133	23.7549
PF3D7_0936800	Plasmodium falciparum 3D7	Plasmodium exported protein (PHISTc), unknown function	N/A	Previous IDs: PFI1780w	281	0	0.26073	0.336639	-0.530692	NA	NA	NA	20.5494	20.4145	20.6147	20.5063	20.2759	19.2043	NA	NA	NA	NA	NA	NA
PF3D7_0936800	Plasmodium falciparum 3D7	Plasmodium exported protein (PHISTc), unknown function	N/A	Previous IDs: PFI1780w	79	0	0.640467	0.116651	-0.119852	NA	NA	NA	18.9076	18.4037	18.933	18.6811	18.3224	18.8813	NA	NA	NA	NA	NA	NA
PF3D7_0936800	Plasmodium falciparum 3D7	Plasmodium exported protein (PHISTc), unknown function	N/A	Previous IDs: PFI1780w	312	0	0.466076	0.196101	0.327418	0.819154	0.0364916	0.107286	22.427	22.4452	22.7254	23.6514	22.552	22.3764	22.2773	22.8143	22.8058	22.3147	23.2585	22.6461
PF3D7_0936800	Plasmodium falciparum 3D7	Plasmodium exported protein (PHISTc), unknown function	N/A	Previous IDs: PFI1780w	317	0	0.21026	0.390754	0.149978	NA	NA	NA	20.6328	19.9917	20.825	20.6119	21.1043	20.1831	NA	NA	NA	NA	NA	NA
PF3D7_0936800	Plasmodium falciparum 3D7	Plasmodium exported protein (PHISTc), unknown function	N/A	Previous IDs: PFI1780w	376	0	0.326373	0.286194	0.304808	0.17304	0.29853	0.26145	20.6065	19.8494	20.6499	20.7132	20.5123	20.7947	18.6332	19.1781	18.4952	18.9972	18.9355	19.1581
PF3D7_0936800	Plasmodium falciparum 3D7	Plasmodium exported protein (PHISTc), unknown function	N/A	Previous IDs: PFI1780w	357	0	0.279714	0.319364	-0.157438	NA	NA	NA	19.3356	19.1429	19.5926	19.6933	18.3185	19.587	NA	NA	NA	NA	NA	NA
PF3D7_0936800	Plasmodium falciparum 3D7	Plasmodium exported protein (PHISTc), unknown function	N/A	Previous IDs: PFI1780w	365	0	0.17224	0.441551	0.466199	NA	NA	NA	21.1809	20.6577	21.6007	21.5331	21.7765	21.5284	NA	NA	NA	NA	NA	NA
PF3D7_0936800	Plasmodium falciparum 3D7	Plasmodium exported protein (PHISTc), unknown function	N/A	Previous IDs: PFI1780w	307	0	0.432542	0.217221	0.354451	0.706992	0.0639486	-0.0576137	23.5226	23.5013	23.8723	24.2708	24.0468	23.6419	23.9831	24.4243	24.2037	24.1189	24.2685	24.0508
PF3D7_0936800	Plasmodium falciparum 3D7	Plasmodium exported protein (PHISTc), unknown function	N/A	Previous IDs: PFI1780w	297	0	0.605629	0.129819	-0.0474756	0.296517	0.195801	0.378111	22.6278	22.7501	22.8915	22.7492	22.7447	22.6332	20.4872	20.4607	20.1323	20.2293	20.7382	21.2471
PF3D7_0936800	Plasmodium falciparum 3D7	Plasmodium exported protein (PHISTc), unknown function	N/A	Previous IDs: PFI1780w	352	0	0.351699	0.259863	-0.105036	0.983785	0.00594325	0.0499586	25.1341	24.9758	25.304	25.0047	25.095	24.9991	17.4045	23.0787	22.7018	22.5228	22.5168	18.2953
PF3D7_0936800	Plasmodium falciparum 3D7	Plasmodium exported protein (PHISTc), unknown function	N/A	Previous IDs: PFI1780w	332	0	0.103541	0.56765	0.221099	0.000335398	1.92044	-0.240116	21.0699	20.8898	21.613	21.5048	21.5873	21.1438	20.6564	20.6087	20.585	20.3754	20.3766	20.3777
PF3D7_0936800	Plasmodium falciparum 3D7	Plasmodium exported protein (PHISTc), unknown function	N/A	Previous IDs: PFI1780w	350	0	0.351699	0.259863	-0.105036	0.983785	0.00594325	0.0499586	25.1341	24.9758	25.304	25.0047	25.095	24.9991	17.4045	23.0787	22.7018	22.5228	22.5168	18.2953
PF3D7_0936800	Plasmodium falciparum 3D7	Plasmodium exported protein (PHISTc), unknown function	N/A	Previous IDs: PFI1780w	255	0	NA	NA	NA	NA	NA	NA	NA	NA	NA	NA	NA	NA	NA	NA	NA	NA	NA	NA
PF3D7_0936800	Plasmodium falciparum 3D7	Plasmodium exported protein (PHISTc), unknown function	N/A	Previous IDs: PFI1780w	80	0	0.0521095	0.754066	-0.279082	0.559866	0.0982876	-0.362165	20.8802	20.5763	20.8088	20.5756	20.2359	20.6166	21.0092	21.6377	22.2662	22.007	20.4865	21.3331
PF3D7_0936800	Plasmodium falciparum 3D7	Plasmodium exported protein (PHISTc), unknown function	N/A	Previous IDs: PFI1780w	302	0	0.161449	0.457689	-0.133532	0.642449	0.0808666	0.194017	22.7065	22.6821	22.9251	22.6351	22.6572	22.6209	20.883	21.0979	20.6452	20.7524	21.0831	21.3726
PF3D7_0936800	Plasmodium falciparum 3D7	Plasmodium exported protein (PHISTc), unknown function	N/A	Previous IDs: PFI1780w	327	0	0.282165	0.318074	0.11355	0.578379	0.0971682	0.223842	21.3704	20.9922	21.5977	21.3812	21.7919	21.1279	18.8131	19.9457	19.8564	19.9043	19.707	19.6755
PF3D7_0936800	Plasmodium falciparum 3D7	Plasmodium exported protein (PHISTc), unknown function	N/A	Previous IDs: PFI1780w	92	0	0.194692	0.414728	-0.178067	NA	NA	NA	21.524	21.3749	21.5113	21.2892	21.2906	21.2962	NA	NA	NA	NA	NA	NA
PF3D7_0936800	Plasmodium falciparum 3D7	Plasmodium exported protein (PHISTc), unknown function	N/A	Previous IDs: PFI1780w	295	0	0.26073	0.336639	-0.530692	NA	NA	NA	20.5494	20.4145	20.6147	20.5063	20.2759	19.2043	NA	NA	NA	NA	NA	NA
PF3D7_0936800	Plasmodium falciparum 3D7	Plasmodium exported protein (PHISTc), unknown function	N/A	Previous IDs: PFI1780w	379	0	0.0457034	0.78727	1.06277	NA	NA	NA	18.7962	17.905	18.7113	19.8721	19.6558	19.0728	NA	NA	NA	NA	NA	NA
PF3D7_0936800	Plasmodium falciparum 3D7	Plasmodium exported protein (PHISTc), unknown function	N/A	Previous IDs: PFI1780w	342	0	0.428439	0.21972	0.285185	0.455856	0.132123	-0.28187	22.8002	22.7534	23.0036	23.8016	22.8849	22.7262	21.4186	21.8518	21.8217	20.8192	21.7613	21.6659
PF3D7_0936800	Plasmodium falciparum 3D7	Plasmodium exported protein (PHISTc), unknown function	N/A	Previous IDs: PFI1780w	337	0	0.903458	0.0292047	-0.00512361	0.706992	0.0639486	-0.0576137	26.253	26.2366	26.2448	26.1985	26.3184	26.2021	23.9831	24.4243	24.2037	24.1189	24.2685	24.0508
PF3D7_0936800	Plasmodium falciparum 3D7	Plasmodium exported protein (PHISTc), unknown function	N/A	Previous IDs: PFI1780w	360	0	0.198175	0.410931	0.253229	0.83213	0.033568	0.0788653	22.1224	21.771	22.6312	22.4271	22.3936	22.4637	19.8593	20.9926	20.7398	20.5189	20.7224	20.587
PF3D7_0936800	Plasmodium falciparum 3D7	Plasmodium exported protein (PHISTc), unknown function	N/A	Previous IDs: PFI1780w	347	0	0.351699	0.259863	-0.105036	0.983785	0.00594325	0.0499586	25.1341	24.9758	25.304	25.0047	25.095	24.9991	17.4045	23.0787	22.7018	22.5228	22.5168	18.2953
PF3D7_1001000	Plasmodium falciparum 3D7	Plasmodium exported protein (hyp12), unknown function	PfJ13	Previous IDs: PF10_0013	100	0	0.0206438	0.997008	0.707045	NA	NA	NA	20.8341	21.0699	20.952	21.3508	21.9673	21.659	NA	NA	NA	NA	NA	NA
PF3D7_1001000	Plasmodium falciparum 3D7	Plasmodium exported protein (hyp12), unknown function	PfJ13	Previous IDs: PF10_0013	127	0	0.402197	0.232126	0.307492	NA	NA	NA	21.894	21.567	22.188	22.1905	21.7139	22.6671	NA	NA	NA	NA	NA	NA
PF3D7_1001000	Plasmodium falciparum 3D7	Plasmodium exported protein (hyp12), unknown function	PfJ13	Previous IDs: PF10_0013	141	0	0.402197	0.232126	0.307492	NA	NA	NA	21.894	21.567	22.188	22.1905	21.7139	22.6671	NA	NA	NA	NA	NA	NA
PF3D7_1001000	Plasmodium falciparum 3D7	Plasmodium exported protein (hyp12), unknown function	PfJ13	Previous IDs: PF10_0013	89	0	0.666386	0.104042	0.0258978	0.911567	0.016465	0.0224119	25.3276	25.2141	25.3092	25.396	25.2638	25.2688	22.5957	23.1809	23.0696	23.0761	22.9726	22.8646
PF3D7_1001000	Plasmodium falciparum 3D7	Plasmodium exported protein (hyp12), unknown function	PfJ13	Previous IDs: PF10_0013	117	0	0.15259	0.472102	0.206388	NA	NA	NA	22.7986	22.7526	22.91	23.2392	22.9474	22.8939	NA	NA	NA	NA	NA	NA
PF3D7_1001000	Plasmodium falciparum 3D7	Plasmodium exported protein (hyp12), unknown function	PfJ13	Previous IDs: PF10_0013	84	0	0.0151856	1.0741	0.292921	0.684658	0.0737003	0.203142	22.2831	22.1487	22.3315	22.5662	22.4587	22.6172	20.0264	20.5481	20.0546	20.331	19.7074	21.2002
PF3D7_1001000	Plasmodium falciparum 3D7	Plasmodium exported protein (hyp12), unknown function	PfJ13	Previous IDs: PF10_0013	66	0	0.212127	0.388418	0.168469	0.486107	0.111691	0.0250191	20.8138	20.4321	21.025	20.9616	20.87	20.9448	18.9286	19.606	19.5543	19.3448	18.9411	19.878
PF3D7_1001000	Plasmodium falciparum 3D7	Plasmodium exported protein (hyp12), unknown function	PfJ13	Previous IDs: PF10_0013	102	0	0.00805878	1.28411	0.239665	0.918999	0.0162478	0.0315486	21.2707	21.4611	21.4273	21.4641	21.833	21.581	19.3294	19.8362	19.5257	19.2353	20.079	19.4717
PF3D7_1001200	Plasmodium falciparum 3D7	acyl-CoA binding protein, isoform 2, ACBP2	ACBP2	Previous IDs: PF10_0016	34	0	NA	NA	NA	NA	NA	NA	NA	NA	NA	NA	NA	NA	NA	NA	NA	NA	NA	NA
PF3D7_1001200	Plasmodium falciparum 3D7	acyl-CoA binding protein, isoform 2, ACBP2	ACBP2	Previous IDs: PF10_0016	44	0	0.725448	0.0811792	-0.128479	NA	NA	NA	21.6841	21.3219	21.4415	21.9742	21.206	20.8819	NA	NA	NA	NA	NA	NA
PF3D7_1001400	Plasmodium falciparum 3D7	exported lipase 1	XL1	Previous IDs: PF10_0018	551	0	0.193126	0.414728	-0.267759	NA	NA	NA	21.0837	21.4229	20.8456	20.9121	20.7872	20.8496	NA	NA	NA	NA	NA	NA
PF3D7_1001600	Plasmodium falciparum 3D7	exported lipase 2	XL2	Previous IDs: PF10_0020	346	0	NA	NA	NA	NA	NA	NA	NA	NA	NA	NA	NA	NA	NA	NA	NA	NA	NA	NA
PF3D7_1001600	Plasmodium falciparum 3D7	exported lipase 2	XL2	Previous IDs: PF10_0020	291	0	0.276118	0.322817	-0.503432	NA	NA	NA	21.3455	21.0266	20.1142	20.0644	20.3164	20.5951	NA	NA	NA	NA	NA	NA
PF3D7_1001600	Plasmodium falciparum 3D7	exported lipase 2	XL2	Previous IDs: PF10_0020	571	0	NA	NA	NA	NA	NA	NA	NA	NA	NA	NA	NA	NA	NA	NA	NA	NA	NA	NA
PF3D7_1001600	Plasmodium falciparum 3D7	exported lipase 2	XL2	Previous IDs: PF10_0020	110	0	0.0286793	0.913068	-0.369035	NA	NA	NA	20.9286	20.6696	20.7991	20.2896	20.5705	20.4301	NA	NA	NA	NA	NA	NA
PF3D7_1001600	Plasmodium falciparum 3D7	exported lipase 2	XL2	Previous IDs: PF10_0020	289	0	0.276118	0.322817	-0.503432	NA	NA	NA	21.3455	21.0266	20.1142	20.0644	20.3164	20.5951	NA	NA	NA	NA	NA	NA
PF3D7_1001600	Plasmodium falciparum 3D7	exported lipase 2	XL2	Previous IDs: PF10_0020	332	0	NA	NA	NA	NA	NA	NA	NA	NA	NA	NA	NA	NA	NA	NA	NA	NA	NA	NA
PF3D7_1001600	Plasmodium falciparum 3D7	exported lipase 2	XL2	Previous IDs: PF10_0020	535	0	0.0364205	0.838147	-0.773079	NA	NA	NA	20.85	20.8956	20.8043	19.934	19.7362	20.5605	NA	NA	NA	NA	NA	NA
PF3D7_1001800	Plasmodium falciparum 3D7	Plasmodium exported protein (PHISTc), unknown function	N/A	Previous IDs: PF10_0022	75	0	0.0601052	0.71625	-0.369605	NA	NA	NA	21.7047	21.7929	21.8812	21.5789	21.1592	21.5319	NA	NA	NA	NA	NA	NA
PF3D7_1001800	Plasmodium falciparum 3D7	Plasmodium exported protein (PHISTc), unknown function	N/A	Previous IDs: PF10_0022	71	0	NA	NA	NA	NA	NA	NA	NA	NA	NA	NA	NA	NA	NA	NA	NA	NA	NA	NA
PF3D7_1002200	Plasmodium falciparum 3D7	tryptophan-rich antigen 3	PArt	Previous IDs: PF10_0026	342	0	NA	NA	NA	NA	NA	NA	NA	NA	NA	NA	NA	NA	NA	NA	NA	NA	NA	NA
PF3D7_1002200	Plasmodium falciparum 3D7	tryptophan-rich antigen 3	PArt	Previous IDs: PF10_0026	470	0	NA	NA	NA	NA	NA	NA	NA	NA	NA	NA	NA	NA	NA	NA	NA	NA	NA	NA
PF3D7_1002200	Plasmodium falciparum 3D7	tryptophan-rich antigen 3	PArt	Previous IDs: PF10_0026	473	0	NA	NA	NA	NA	NA	NA	NA	NA	NA	NA	NA	NA	NA	NA	NA	NA	NA	NA
PF3D7_1003500	Plasmodium falciparum 3D7	40S ribosomal protein S20e, putative	N/A	Previous IDs: PF10_0038	6	0	NA	NA	NA	NA	NA	NA	NA	NA	NA	NA	NA	NA	NA	NA	NA	NA	NA	NA
PF3D7_1016300	Plasmodium falciparum 3D7	GBP130 protein	GBP130	Previous IDs: PF10_0159	124	0	0.0581258	0.729546	-2.66681	NA	NA	NA	21.1317	22.2405	21.2404	20.4975	18.9082	17.2065	NA	NA	NA	NA	NA	NA
PF3D7_1016300	Plasmodium falciparum 3D7	GBP130 protein	GBP130	Previous IDs: PF10_0159	404	0	0.000120741	2.50395	-0.532286	0.0422582	0.624976	-0.719041	24.9327	24.6448	24.5521	24.1925	24.2296	24.1106	24.4577	24.5959	25.1289	23.8738	23.8761	24.2755
PF3D7_1016300	Plasmodium falciparum 3D7	GBP130 protein	GBP130	Previous IDs: PF10_0159	446	0	9.90216e-05	2.53639	-0.52123	0.530893	0.102066	0.666309	25.7096	25.4563	25.7318	25.1108	25.1777	25.0454	26.4288	23.8104	26.9047	26.6632	26.2041	26.2755
PF3D7_1016300	Plasmodium falciparum 3D7	GBP130 protein	GBP130	Previous IDs: PF10_0159	254	0	0.427556	0.220068	0.432404	NA	NA	NA	24.2276	25.1138	23.6797	24.8142	24.6759	24.8283	NA	NA	NA	NA	NA	NA
PF3D7_1016300	Plasmodium falciparum 3D7	GBP130 protein	GBP130	Previous IDs: PF10_0159	553	0	0.399541	0.232468	-0.428266	NA	NA	NA	23.3971	23.2986	23.2959	23.4933	23.2024	22.0111	NA	NA	NA	NA	NA	NA
PF3D7_1016300	Plasmodium falciparum 3D7	GBP130 protein	GBP130	Previous IDs: PF10_0159	200	0	0.194574	0.414728	2.36727	NA	NA	NA	23.0407	17.7758	20.4083	22.8766	22.7681	22.682	NA	NA	NA	NA	NA	NA
PF3D7_1016300	Plasmodium falciparum 3D7	GBP130 protein	GBP130	Previous IDs: PF10_0159	373	0	NA	NA	NA	NA	NA	NA	NA	NA	NA	NA	NA	NA	NA	NA	NA	NA	NA	NA
PF3D7_1016300	Plasmodium falciparum 3D7	GBP130 protein	GBP130	Previous IDs: PF10_0159	149	0	0.00308802	1.51573	0.434749	0.014964	0.823795	-0.434721	24.7331	24.6494	24.6749	25.2555	25.2945	24.8117	24.7701	24.8662	24.8979	24.4187	24.4313	24.3801
PF3D7_1016300	Plasmodium falciparum 3D7	GBP130 protein	GBP130	Previous IDs: PF10_0159	772	0	NA	NA	NA	NA	NA	NA	NA	NA	NA	NA	NA	NA	NA	NA	NA	NA	NA	NA
PF3D7_1016300	Plasmodium falciparum 3D7	GBP130 protein	GBP130	Previous IDs: PF10_0159	354	0	0.000120741	2.50395	-0.532286	0.0422582	0.624976	-0.719041	24.9327	24.6448	24.5521	24.1925	24.2296	24.1106	24.4577	24.5959	25.1289	23.8738	23.8761	24.2755
PF3D7_1016300	Plasmodium falciparum 3D7	GBP130 protein	GBP130	Previous IDs: PF10_0159	496	0	9.90216e-05	2.53639	-0.52123	0.530893	0.102066	0.666309	25.7096	25.4563	25.7318	25.1108	25.1777	25.0454	26.4288	23.8104	26.9047	26.6632	26.2041	26.2755
PF3D7_1016300	Plasmodium falciparum 3D7	GBP130 protein	GBP130	Previous IDs: PF10_0159	304	0	0.0444831	0.791279	0.708586	NA	NA	NA	23.5648	23.5448	22.9308	24.1517	24.1675	23.8469	NA	NA	NA	NA	NA	NA
PF3D7_1016300	Plasmodium falciparum 3D7	GBP130 protein	GBP130	Previous IDs: PF10_0159	672	0	NA	NA	NA	NA	NA	NA	NA	NA	NA	NA	NA	NA	NA	NA	NA	NA	NA	NA
PF3D7_1016300	Plasmodium falciparum 3D7	GBP130 protein	GBP130	Previous IDs: PF10_0159	397	0	9.90216e-05	2.53639	-0.52123	0.530893	0.102066	0.666309	25.7096	25.4563	25.7318	25.1108	25.1777	25.0454	26.4288	23.8104	26.9047	26.6632	26.2041	26.2755
PF3D7_1016300	Plasmodium falciparum 3D7	GBP130 protein	GBP130	Previous IDs: PF10_0159	247	0	0.90648	0.0292047	0.0198178	0.0197368	0.793874	-0.569965	30.1706	29.9281	30.0514	30.3531	29.9077	29.9488	25.9475	26.3049	26.3229	25.8007	25.5296	25.535
PF3D7_1016300	Plasmodium falciparum 3D7	GBP130 protein	GBP130	Previous IDs: PF10_0159	646	0	0.412639	0.22654	-0.827012	0.195685	0.271558	-0.416888	25.1396	24.8495	24.983	23.3164	24.906	24.2685	23.9061	23.99	24.557	24.0016	23.4067	23.7942
PF3D7_1016300	Plasmodium falciparum 3D7	GBP130 protein	GBP130	Previous IDs: PF10_0159	696	0	0.90648	0.0292047	0.0198178	0.0197368	0.793874	-0.569965	30.1706	29.9281	30.0514	30.3531	29.9077	29.9488	25.9475	26.3049	26.3229	25.8007	25.5296	25.535
PF3D7_1016300	Plasmodium falciparum 3D7	GBP130 protein	GBP130	Previous IDs: PF10_0159	453	0	0.000120741	2.50395	-0.532286	0.0422582	0.624976	-0.719041	24.9327	24.6448	24.5521	24.1925	24.2296	24.1106	24.4577	24.5959	25.1289	23.8738	23.8761	24.2755
PF3D7_1016300	Plasmodium falciparum 3D7	GBP130 protein	GBP130	Previous IDs: PF10_0159	216	0	0.835699	0.0460646	0.0561978	NA	NA	NA	22.8298	22.723	23.2197	23.3718	22.8855	22.6837	NA	NA	NA	NA	NA	NA
PF3D7_1016300	Plasmodium falciparum 3D7	GBP130 protein	GBP130	Previous IDs: PF10_0159	746	0	0.90648	0.0292047	0.0198178	0.0197368	0.793874	-0.569965	30.1706	29.9281	30.0514	30.3531	29.9077	29.9488	25.9475	26.3049	26.3229	25.8007	25.5296	25.535
PF3D7_1016300	Plasmodium falciparum 3D7	GBP130 protein	GBP130	Previous IDs: PF10_0159	273	0	NA	NA	NA	NA	NA	NA	NA	NA	NA	NA	NA	NA	NA	NA	NA	NA	NA	NA
PF3D7_1016300	Plasmodium falciparum 3D7	GBP130 protein	GBP130	Previous IDs: PF10_0159	722	0	NA	NA	NA	NA	NA	NA	NA	NA	NA	NA	NA	NA	NA	NA	NA	NA	NA	NA
PF3D7_1016300	Plasmodium falciparum 3D7	GBP130 protein	GBP130	Previous IDs: PF10_0159	603	0	0.427556	0.220068	0.432404	NA	NA	NA	24.2276	25.1138	23.6797	24.8142	24.6759	24.8283	NA	NA	NA	NA	NA	NA
PF3D7_1016300	Plasmodium falciparum 3D7	GBP130 protein	GBP130	Previous IDs: PF10_0159	98	0	0.221016	0.376551	-0.366441	NA	NA	NA	19.7445	19.3941	20.0618	19.3139	19.3377	19.4494	NA	NA	NA	NA	NA	NA
PF3D7_1016300	Plasmodium falciparum 3D7	GBP130 protein	GBP130	Previous IDs: PF10_0159	572	0	NA	NA	NA	NA	NA	NA	NA	NA	NA	NA	NA	NA	NA	NA	NA	NA	NA	NA
PF3D7_1016300	Plasmodium falciparum 3D7	GBP130 protein	GBP130	Previous IDs: PF10_0159	653	0	0.399541	0.232468	-0.428266	NA	NA	NA	23.3971	23.2986	23.2959	23.4933	23.2024	22.0111	NA	NA	NA	NA	NA	NA
PF3D7_1016300	Plasmodium falciparum 3D7	GBP130 protein	GBP130	Previous IDs: PF10_0159	703	0	0.427556	0.220068	0.432404	NA	NA	NA	24.2276	25.1138	23.6797	24.8142	24.6759	24.8283	NA	NA	NA	NA	NA	NA
PF3D7_1016300	Plasmodium falciparum 3D7	GBP130 protein	GBP130	Previous IDs: PF10_0159	522	0	NA	NA	NA	NA	NA	NA	NA	NA	NA	NA	NA	NA	NA	NA	NA	NA	NA	NA
PF3D7_1016300	Plasmodium falciparum 3D7	GBP130 protein	GBP130	Previous IDs: PF10_0159	803	0	0.00434386	1.46909	-0.17624	NA	NA	NA	23.3334	23.1939	22.7318	23.0599	22.9104	22.7602	NA	NA	NA	NA	NA	NA
PF3D7_1016300	Plasmodium falciparum 3D7	GBP130 protein	GBP130	Previous IDs: PF10_0159	796	0	0.000623331	2.02672	-0.296625	0.530893	0.102066	0.666309	25.8108	25.5888	25.6861	25.5077	25.3502	25.3379	26.4288	23.8104	26.9047	26.6632	26.2041	26.2755
PF3D7_1016300	Plasmodium falciparum 3D7	GBP130 protein	GBP130	Previous IDs: PF10_0159	503	0	0.000120741	2.50395	-0.532286	0.0422582	0.624976	-0.719041	24.9327	24.6448	24.5521	24.1925	24.2296	24.1106	24.4577	24.5959	25.1289	23.8738	23.8761	24.2755
PF3D7_1016300	Plasmodium falciparum 3D7	GBP130 protein	GBP130	Previous IDs: PF10_0159	323	0	NA	NA	NA	NA	NA	NA	NA	NA	NA	NA	NA	NA	NA	NA	NA	NA	NA	NA
PF3D7_1016300	Plasmodium falciparum 3D7	GBP130 protein	GBP130	Previous IDs: PF10_0159	166	0	0.440271	0.21279	-0.191113	NA	NA	NA	21.8544	22.0801	22.2149	21.914	22.0573	21.6047	NA	NA	NA	NA	NA	NA
PF3D7_1016300	Plasmodium falciparum 3D7	GBP130 protein	GBP130	Previous IDs: PF10_0159	297	0	0.90648	0.0292047	0.0198178	0.0197368	0.793874	-0.569965	30.1706	29.9281	30.0514	30.3531	29.9077	29.9488	25.9475	26.3049	26.3229	25.8007	25.5296	25.535
PF3D7_1016300	Plasmodium falciparum 3D7	GBP130 protein	GBP130	Previous IDs: PF10_0159	148	0	0.079003	0.638944	-0.302629	NA	NA	NA	22.0863	21.7012	21.8862	21.7195	21.5164	21.5299	NA	NA	NA	NA	NA	NA
PF3D7_1016300	Plasmodium falciparum 3D7	GBP130 protein	GBP130	Previous IDs: PF10_0159	596	0	0.90648	0.0292047	0.0198178	0.0197368	0.793874	-0.569965	30.1706	29.9281	30.0514	30.3531	29.9077	29.9488	25.9475	26.3049	26.3229	25.8007	25.5296	25.535
PF3D7_1016300	Plasmodium falciparum 3D7	GBP130 protein	GBP130	Previous IDs: PF10_0159	160	0	NA	NA	NA	NA	NA	NA	NA	NA	NA	NA	NA	NA	NA	NA	NA	NA	NA	NA
PF3D7_1016300	Plasmodium falciparum 3D7	GBP130 protein	GBP130	Previous IDs: PF10_0159	546	0	0.412639	0.22654	-0.827012	0.195685	0.271558	-0.416888	25.1396	24.8495	24.983	23.3164	24.906	24.2685	23.9061	23.99	24.557	24.0016	23.4067	23.7942
PF3D7_1016300	Plasmodium falciparum 3D7	GBP130 protein	GBP130	Previous IDs: PF10_0159	753	0	0.0444831	0.791279	0.708586	NA	NA	NA	23.5648	23.5448	22.9308	24.1517	24.1675	23.8469	NA	NA	NA	NA	NA	NA
PF3D7_1016300	Plasmodium falciparum 3D7	GBP130 protein	GBP130	Previous IDs: PF10_0159	472	0	NA	NA	NA	NA	NA	NA	NA	NA	NA	NA	NA	NA	NA	NA	NA	NA	NA	NA
PF3D7_1016300	Plasmodium falciparum 3D7	GBP130 protein	GBP130	Previous IDs: PF10_0159	347	0	9.90216e-05	2.53639	-0.52123	0.530893	0.102066	0.666309	25.7096	25.4563	25.7318	25.1108	25.1777	25.0454	26.4288	23.8104	26.9047	26.6632	26.2041	26.2755
PF3D7_1016300	Plasmodium falciparum 3D7	GBP130 protein	GBP130	Previous IDs: PF10_0159	167	0	0.184116	0.425866	-0.416789	NA	NA	NA	21.9176	22.3977	22.6962	22.0456	22.0493	21.6664	NA	NA	NA	NA	NA	NA
PF3D7_1016300	Plasmodium falciparum 3D7	GBP130 protein	GBP130	Previous IDs: PF10_0159	163	0	0.0506533	0.760946	0.715305	NA	NA	NA	21.3017	21.5315	21.6311	22.3834	22.5732	21.6536	NA	NA	NA	NA	NA	NA
PF3D7_1016400	Plasmodium falciparum 3D7	serine/threonine protein kinase, FIKK family	FIKK10.1	Previous IDs: PF10_0160	130	0	NA	NA	NA	NA	NA	NA	NA	NA	NA	NA	NA	NA	NA	NA	NA	NA	NA	NA
PF3D7_1016400	Plasmodium falciparum 3D7	serine/threonine protein kinase, FIKK family	FIKK10.1	Previous IDs: PF10_0160	174	0	NA	NA	NA	NA	NA	NA	NA	NA	NA	NA	NA	NA	NA	NA	NA	NA	NA	NA
PF3D7_1016400	Plasmodium falciparum 3D7	serine/threonine protein kinase, FIKK family	FIKK10.1	Previous IDs: PF10_0160	170	0	NA	NA	NA	NA	NA	NA	NA	NA	NA	NA	NA	NA	NA	NA	NA	NA	NA	NA
PF3D7_1016400	Plasmodium falciparum 3D7	serine/threonine protein kinase, FIKK family	FIKK10.1	Previous IDs: PF10_0160	462	0	0.802749	0.0572069	-0.0681556	0.812606	0.0373761	-0.0417747	23.5154	24.0583	23.3	23.7844	23.3793	23.5055	23.3399	23.2174	23.2093	22.9301	23.2293	23.4819
PF3D7_1016400	Plasmodium falciparum 3D7	serine/threonine protein kinase, FIKK family	FIKK10.1	Previous IDs: PF10_0160	608	0	0.372068	0.245036	0.297954	NA	NA	NA	21.2651	21.3246	20.4869	21.5697	21.2123	21.1884	NA	NA	NA	NA	NA	NA
PF3D7_1016400	Plasmodium falciparum 3D7	serine/threonine protein kinase, FIKK family	FIKK10.1	Previous IDs: PF10_0160	135	0	0.478579	0.18938	-0.147706	0.904021	0.017816	-0.0350414	22.0112	21.6579	22.0596	22.0255	21.5455	21.7146	21.012	21.3683	21.5728	20.8847	21.6369	21.3264
PF3D7_1016400	Plasmodium falciparum 3D7	serine/threonine protein kinase, FIKK family	FIKK10.1	Previous IDs: PF10_0160	239	0	0.277719	0.320975	-0.145689	NA	NA	NA	21.5211	21.7314	21.649	21.3562	21.6811	21.4271	NA	NA	NA	NA	NA	NA
PF3D7_1016400	Plasmodium falciparum 3D7	serine/threonine protein kinase, FIKK family	FIKK10.1	Previous IDs: PF10_0160	479	0	0.578156	0.139742	0.221474	0.613696	0.0840165	-0.297143	22.5786	22.7842	22.1374	22.5909	22.6077	22.966	22.4717	22.3118	23.4544	22.0593	22.7577	22.5295
PF3D7_1016400	Plasmodium falciparum 3D7	serine/threonine protein kinase, FIKK family	FIKK10.1	Previous IDs: PF10_0160	162	0	0.203235	0.40325	0.100399	0.451201	0.132123	-0.32819	24.5018	24.182	24.4507	24.7163	24.364	24.3553	23.4953	23.7819	24.3069	23.5489	23.8063	23.2444
PF3D7_1016400	Plasmodium falciparum 3D7	serine/threonine protein kinase, FIKK family	FIKK10.1	Previous IDs: PF10_0160	158	0	0.191187	0.417512	0.350674	0.170581	0.300093	-0.636648	24.4216	24.1162	24.3801	25.0511	24.5319	24.3869	22.48	22.945	23.6081	22.2601	22.7566	22.1064
PF3D7_1016600	Plasmodium falciparum 3D7	Plasmodium exported protein (PHISTc), unknown function	N/A	Previous IDs: PF10_0161;PF10_0161a	146	0	NA	NA	NA	0.949558	0.00898797	-0.0139014	NA	NA	NA	NA	NA	NA	22.1876	21.9473	22.5012	22.4491	22.0131	22.1322
PF3D7_1016600	Plasmodium falciparum 3D7	Plasmodium exported protein (PHISTc), unknown function	N/A	Previous IDs: PF10_0161;PF10_0161a	140	0	NA	NA	NA	0.949558	0.00898797	-0.0139014	NA	NA	NA	NA	NA	NA	22.1876	21.9473	22.5012	22.4491	22.0131	22.1322
PF3D7_1016700	Plasmodium falciparum 3D7	Plasmodium exported protein (PHISTc), unknown function	N/A	Previous IDs: PF10_0162	256	0	NA	NA	NA	0.243689	0.233876	0.313392	NA	NA	NA	NA	NA	NA	20.0717	20.7992	20.6585	20.7685	20.9328	20.7683
PF3D7_1016700	Plasmodium falciparum 3D7	Plasmodium exported protein (PHISTc), unknown function	N/A	Previous IDs: PF10_0162	434	0	NA	NA	NA	NA	NA	NA	NA	NA	NA	NA	NA	NA	NA	NA	NA	NA	NA	NA
PF3D7_1016700	Plasmodium falciparum 3D7	Plasmodium exported protein (PHISTc), unknown function	N/A	Previous IDs: PF10_0162	480	0	NA	NA	NA	0.91717	0.0162478	-0.0506247	NA	NA	NA	NA	NA	NA	20.9659	22.4558	21.4843	21.8558	21.4525	21.4458
PF3D7_1016700	Plasmodium falciparum 3D7	Plasmodium exported protein (PHISTc), unknown function	N/A	Previous IDs: PF10_0162	174	0	NA	NA	NA	0.389253	0.153686	0.115969	NA	NA	NA	NA	NA	NA	23.4442	23.4398	23.6329	23.4408	23.7937	23.6303
PF3D7_1016700	Plasmodium falciparum 3D7	Plasmodium exported protein (PHISTc), unknown function	N/A	Previous IDs: PF10_0162	496	0	NA	NA	NA	NA	NA	NA	NA	NA	NA	NA	NA	NA	NA	NA	NA	NA	NA	NA
PF3D7_1019000	Plasmodium falciparum 3D7	eukaryotic translation initiation factor subunit eIF2A, putative	N/A	Previous IDs: PF10_0183	1399	0	NA	NA	NA	0.981594	0.00594325	0.00702528	NA	NA	NA	NA	NA	NA	20.8663	20.8379	21.677	21.0452	21.0653	21.2918
PF3D7_1026000	Plasmodium falciparum 3D7	conserved Plasmodium protein, unknown function	N/A	Previous IDs: PF10_0257	4	0	NA	NA	NA	NA	NA	NA	NA	NA	NA	NA	NA	NA	NA	NA	NA	NA	NA	NA
PF3D7_1033200	Plasmodium falciparum 3D7	early transcribed membrane protein 10.2	ETRAMP10.2	Previous IDs: PF10_0323	330	0	0.000554729	2.02672	0.634144	0.160342	0.300924	0.258575	22.3237	22.3371	22.4633	22.9697	23.0984	22.9584	20.6687	21.1295	21.0076	21.2924	21.2031	21.0861
PF3D7_1033200	Plasmodium falciparum 3D7	early transcribed membrane protein 10.2	ETRAMP10.2	Previous IDs: PF10_0323	190	0	NA	NA	NA	NA	NA	NA	NA	NA	NA	NA	NA	NA	NA	NA	NA	NA	NA	NA
PF3D7_1034900	Plasmodium falciparum 3D7	methionine--tRNA ligase	MRScyt	Previous IDs: PF10_0340	857	1	NA	NA	NA	NA	NA	NA	NA	NA	NA	NA	NA	NA	NA	NA	NA	NA	NA	NA
PF3D7_1035200	Plasmodium falciparum 3D7	S-antigen	N/A	Previous IDs: PF10_0343	39	0	0.509562	0.173534	0.647449	NA	NA	NA	21.0112	22.4156	19.6068	22.1912	21.8606	20.9243	NA	NA	NA	NA	NA	NA
PF3D7_1035200	Plasmodium falciparum 3D7	S-antigen	N/A	Previous IDs: PF10_0343	575	0	NA	NA	NA	NA	NA	NA	NA	NA	NA	NA	NA	NA	NA	NA	NA	NA	NA	NA
PF3D7_1035800	Plasmodium falciparum 3D7	probable protein, unknown function	M712	Previous IDs: PF10_0350	201	0	NA	NA	NA	NA	NA	NA	NA	NA	NA	NA	NA	NA	NA	NA	NA	NA	NA	NA
PF3D7_1036900	Plasmodium falciparum 3D7	conserved Plasmodium protein, unknown function	N/A	Previous IDs: PF10_0361	1098	0	NA	NA	NA	NA	NA	NA	NA	NA	NA	NA	NA	NA	NA	NA	NA	NA	NA	NA
PF3D7_1036900	Plasmodium falciparum 3D7	conserved Plasmodium protein, unknown function	N/A	Previous IDs: PF10_0361	1108	0	NA	NA	NA	NA	NA	NA	NA	NA	NA	NA	NA	NA	NA	NA	NA	NA	NA	NA
PF3D7_1036900	Plasmodium falciparum 3D7	conserved Plasmodium protein, unknown function	N/A	Previous IDs: PF10_0361	1063	0	NA	NA	NA	0.0662851	0.522474	-0.593881	NA	NA	NA	NA	NA	NA	23.2862	22.9011	23.0628	22.0947	22.5684	22.8055
PF3D7_1036900	Plasmodium falciparum 3D7	conserved Plasmodium protein, unknown function	N/A	Previous IDs: PF10_0361	1428	0	NA	NA	NA	0.00278235	1.29215	-0.493184	NA	NA	NA	NA	NA	NA	22.1306	22.244	22.2631	21.6804	21.8106	21.6672
PF3D7_1036900	Plasmodium falciparum 3D7	conserved Plasmodium protein, unknown function	N/A	Previous IDs: PF10_0361	1589	0	NA	NA	NA	0.0713088	0.497713	-0.183409	NA	NA	NA	NA	NA	NA	23.7824	23.8955	23.7738	23.5226	23.6338	23.745
PF3D7_1036900	Plasmodium falciparum 3D7	conserved Plasmodium protein, unknown function	N/A	Previous IDs: PF10_0361	1077	0	NA	NA	NA	0.283702	0.205694	-0.185415	NA	NA	NA	NA	NA	NA	22.9542	23.0101	22.9346	22.9376	22.7688	22.6361
PF3D7_1039000	Plasmodium falciparum 3D7	serine/threonine protein kinase, FIKK family	FIKK10.2	Previous IDs: PF10_0380	804	0	0.074547	0.655093	0.412236	0.329456	0.178748	-0.143198	24.6779	25.1832	24.7117	25.3864	25.2	25.2231	24.0092	23.8649	24.0937	23.7447	24.0033	23.7903
PF3D7_1039000	Plasmodium falciparum 3D7	serine/threonine protein kinase, FIKK family	FIKK10.2	Previous IDs: PF10_0380	709	1	NA	NA	NA	NA	NA	NA	NA	NA	NA	NA	NA	NA	NA	NA	NA	NA	NA	NA
PF3D7_1039000	Plasmodium falciparum 3D7	serine/threonine protein kinase, FIKK family	FIKK10.2	Previous IDs: PF10_0380	514	0	0.408408	0.227772	0.215674	0.00415778	1.20819	0.307457	21.272	21.7826	21.1192	21.739	21.3672	21.7146	20.2923	20.1654	20.2289	20.5363	20.6007	20.4719
PF3D7_1039000	Plasmodium falciparum 3D7	serine/threonine protein kinase, FIKK family	FIKK10.2	Previous IDs: PF10_0380	251	0	0.0531719	0.752993	0.589974	NA	NA	NA	21.4694	21.2733	21.2683	22.3255	21.8238	21.6316	NA	NA	NA	NA	NA	NA
PF3D7_1039000	Plasmodium falciparum 3D7	serine/threonine protein kinase, FIKK family	FIKK10.2	Previous IDs: PF10_0380	235	0	0.537312	0.164519	0.317932	NA	NA	NA	21.368	20.9728	20.9018	21.8059	21.1207	21.2698	NA	NA	NA	NA	NA	NA
PF3D7_1039000	Plasmodium falciparum 3D7	serine/threonine protein kinase, FIKK family	FIKK10.2	Previous IDs: PF10_0380	708	1	NA	NA	NA	NA	NA	NA	NA	NA	NA	NA	NA	NA	NA	NA	NA	NA	NA	NA
PF3D7_1039000	Plasmodium falciparum 3D7	serine/threonine protein kinase, FIKK family	FIKK10.2	Previous IDs: PF10_0380	246	0	0.0320894	0.874273	0.64362	0.736535	0.0602819	0.214732	20.8688	20.7142	20.7868	21.8687	21.0744	21.3575	20.8353	19.887	20.7478	21.4654	19.7292	20.9197
PF3D7_1039000	Plasmodium falciparum 3D7	serine/threonine protein kinase, FIKK family	FIKK10.2	Previous IDs: PF10_0380	699	1	NA	NA	NA	NA	NA	NA	NA	NA	NA	NA	NA	NA	NA	NA	NA	NA	NA	NA
PF3D7_1039000	Plasmodium falciparum 3D7	serine/threonine protein kinase, FIKK family	FIKK10.2	Previous IDs: PF10_0380	204	0	NA	NA	NA	NA	NA	NA	NA	NA	NA	NA	NA	NA	NA	NA	NA	NA	NA	NA
PF3D7_1102500	Plasmodium falciparum 3D7	gametocyte exported protein 2	GEXP02	Previous IDs: PF11_0037	300	0	0.000894242	1.90397	0.51579	0.0270481	0.740864	0.590081	21.5766	21.6381	21.3927	22.2088	21.9921	21.9538	23.51	22.9421	22.9014	24.1206	23.588	23.4151
PF3D7_1102500	Plasmodium falciparum 3D7	gametocyte exported protein 2	GEXP02	Previous IDs: PF11_0037	177	0	NA	NA	NA	NA	NA	NA	NA	NA	NA	NA	NA	NA	NA	NA	NA	NA	NA	NA
PF3D7_1102500	Plasmodium falciparum 3D7	gametocyte exported protein 2	GEXP02	Previous IDs: PF11_0037	395	0	NA	NA	NA	0.00178958	1.4151	1.35301	NA	NA	NA	NA	NA	NA	18.8872	18.8468	18.3914	20.1485	20.1563	19.8796
PF3D7_1102500	Plasmodium falciparum 3D7	gametocyte exported protein 2	GEXP02	Previous IDs: PF11_0037	100	0	NA	NA	NA	0.720099	0.0622699	0.378745	NA	NA	NA	NA	NA	NA	24.2937	23.5003	21.6799	24.7434	22.7879	23.0788
PF3D7_1102500	Plasmodium falciparum 3D7	gametocyte exported protein 2	GEXP02	Previous IDs: PF11_0037	305	0	0.00209566	1.63101	0.621935	0.0496156	0.582043	0.55166	22.4001	22.5139	22.1327	23.1633	22.9912	22.7581	23.081	22.748	22.7036	23.8666	23.0355	23.2854
PF3D7_1102500	Plasmodium falciparum 3D7	gametocyte exported protein 2	GEXP02	Previous IDs: PF11_0037	593	0	0.671874	0.101671	0.147414	NA	NA	NA	21.0515	21.6163	20.5203	21.3139	21.0899	21.2265	NA	NA	NA	NA	NA	NA
PF3D7_1102500	Plasmodium falciparum 3D7	gametocyte exported protein 2	GEXP02	Previous IDs: PF11_0037	175	0	NA	NA	NA	NA	NA	NA	NA	NA	NA	NA	NA	NA	NA	NA	NA	NA	NA	NA
PF3D7_1102500	Plasmodium falciparum 3D7	gametocyte exported protein 2	GEXP02	Previous IDs: PF11_0037	127	0	0.985921	0.004989	0.00648778	0.165602	0.300197	0.51743	22.7706	22.1116	22.03	22.7752	21.9008	22.2556	21.3067	20.7254	21.0407	21.9679	21.5128	21.1443
PF3D7_1102500	Plasmodium falciparum 3D7	gametocyte exported protein 2	GEXP02	Previous IDs: PF11_0037	298	0	NA	NA	NA	NA	NA	NA	NA	NA	NA	NA	NA	NA	NA	NA	NA	NA	NA	NA
PF3D7_1107300	Plasmodium falciparum 3D7	polyadenylate-binding protein-interacting protein 1, putative	PAIP1	Previous IDs: PF11_0086	384	0	0.659381	0.108172	0.103964	0.181558	0.284912	-0.248738	23.3469	23.5946	22.9121	23.2498	23.5566	23.3591	25.5428	25.1114	25.4734	25.0653	25.0371	25.2789
PF3D7_1107300	Plasmodium falciparum 3D7	polyadenylate-binding protein-interacting protein 1, putative	PAIP1	Previous IDs: PF11_0086	1639	0	0.965545	0.0109256	0.0140378	NA	NA	NA	22.3941	21.4374	22.0272	21.9269	21.7733	22.2007	NA	NA	NA	NA	NA	NA
PF3D7_1108600	Plasmodium falciparum 3D7	endoplasmic reticulum-resident calcium binding protein	ERC	Previous IDs: PF11_0098	262	0	NA	NA	NA	NA	NA	NA	NA	NA	NA	NA	NA	NA	NA	NA	NA	NA	NA	NA
PF3D7_1108600	Plasmodium falciparum 3D7	endoplasmic reticulum-resident calcium binding protein	ERC	Previous IDs: PF11_0098	263	0	0.830181	0.0476836	-0.0323922	NA	NA	NA	21.59	21.2501	21.404	21.4995	21.1794	21.4679	NA	NA	NA	NA	NA	NA
PF3D7_1108600	Plasmodium falciparum 3D7	endoplasmic reticulum-resident calcium binding protein	ERC	Previous IDs: PF11_0098	272	0	0.106714	0.558592	0.483433	NA	NA	NA	20.0579	20.6658	19.8447	20.9194	20.4892	20.61	NA	NA	NA	NA	NA	NA
PF3D7_1108600	Plasmodium falciparum 3D7	endoplasmic reticulum-resident calcium binding protein	ERC	Previous IDs: PF11_0098	300	0	0.0808424	0.631284	-0.16187	0.553493	0.0982876	-0.239202	23.5919	23.7714	23.8761	24.0604	23.2135	23.4799	23.923	23.4585	23.8801	23.3544	23.5146	23.6749
PF3D7_1110400	Plasmodium falciparum 3D7	RNA-binding protein, putative	N/A	Previous IDs: PF11_0111	1061	0	NA	NA	NA	NA	NA	NA	NA	NA	NA	NA	NA	NA	NA	NA	NA	NA	NA	NA
PF3D7_1120400	Plasmodium falciparum 3D7	alpha/beta hydrolase fold domain containing protein, putative	N/A	Previous IDs: PF11_0211	15	0	NA	NA	NA	NA	NA	NA	NA	NA	NA	NA	NA	NA	NA	NA	NA	NA	NA	NA
PF3D7_1124800	Plasmodium falciparum 3D7	ribosome biogenesis regulatory protein, putative	RRS1	Previous IDs: PF11_0259	244	0	0.64139	0.11649	-0.102219	NA	NA	NA	21.0803	20.8507	21.31	21.2721	20.7517	20.9105	NA	NA	NA	NA	NA	NA
PF3D7_1135100	Plasmodium falciparum 3D7	protein phosphatase PPM8, putative	PPM8	Previous IDs: PF11_0362	335	0	NA	NA	NA	0.354349	0.165221	-0.315521	NA	NA	NA	NA	NA	NA	22.429	22.2804	22.1398	21.4073	22.1198	22.3755
PF3D7_1135100	Plasmodium falciparum 3D7	protein phosphatase PPM8, putative	PPM8	Previous IDs: PF11_0362	540	0	0.362579	0.249662	-0.5368	NA	NA	NA	23.6353	23.2757	23.4555	23.8062	22.9187	22.0311	NA	NA	NA	NA	NA	NA
PF3D7_1139300	Plasmodium falciparum 3D7	AP2 domain transcription factor, putative	ApiAP2	Previous IDs: PF11_0404	72	1	NA	NA	NA	0.379337	0.155418	-0.182741	NA	NA	NA	NA	NA	NA	22.6956	22.2009	22.3169	22.122	22.44	22.1032
PF3D7_1139300	Plasmodium falciparum 3D7	AP2 domain transcription factor, putative	ApiAP2	Previous IDs: PF11_0404	69	1	NA	NA	NA	0.379337	0.155418	-0.182741	NA	NA	NA	NA	NA	NA	22.6956	22.2009	22.3169	22.122	22.44	22.1032
PF3D7_1139300	Plasmodium falciparum 3D7	AP2 domain transcription factor, putative	ApiAP2	Previous IDs: PF11_0404	62	1	NA	NA	NA	0.379337	0.155418	-0.182741	NA	NA	NA	NA	NA	NA	22.6956	22.2009	22.3169	22.122	22.44	22.1032
PF3D7_1139300	Plasmodium falciparum 3D7	AP2 domain transcription factor, putative	ApiAP2	Previous IDs: PF11_0404	713	0	0.120253	0.536883	-0.458185	0.41263	0.143541	-0.221537	21.9551	21.8649	21.8972	21.9335	21.0191	21.39	21.107	20.7144	20.3217	20.3434	20.6416	20.4935
PF3D7_1148700	Plasmodium falciparum 3D7	Plasmodium exported protein (PHISTc), unknown function	GEXP12	Previous IDs: PF11_0503	332	0	NA	NA	NA	NA	NA	NA	NA	NA	NA	NA	NA	NA	NA	NA	NA	NA	NA	NA
PF3D7_1148700	Plasmodium falciparum 3D7	Plasmodium exported protein (PHISTc), unknown function	GEXP12	Previous IDs: PF11_0503	246	0	0.868968	0.0410892	-0.0480089	NA	NA	NA	19.5185	19.6516	20.1679	19.49	19.6023	20.1016	NA	NA	NA	NA	NA	NA
PF3D7_1148700	Plasmodium falciparum 3D7	Plasmodium exported protein (PHISTc), unknown function	GEXP12	Previous IDs: PF11_0503	256	0	NA	NA	NA	NA	NA	NA	NA	NA	NA	NA	NA	NA	NA	NA	NA	NA	NA	NA
PF3D7_1148700	Plasmodium falciparum 3D7	Plasmodium exported protein (PHISTc), unknown function	GEXP12	Previous IDs: PF11_0503	242	0	NA	NA	NA	NA	NA	NA	NA	NA	NA	NA	NA	NA	NA	NA	NA	NA	NA	NA
PF3D7_1148700	Plasmodium falciparum 3D7	Plasmodium exported protein (PHISTc), unknown function	GEXP12	Previous IDs: PF11_0503	341	0	0.143217	0.492697	-0.386636	NA	NA	NA	19.6963	19.548	19.9325	18.9792	19.487	19.5507	NA	NA	NA	NA	NA	NA
PF3D7_1148700	Plasmodium falciparum 3D7	Plasmodium exported protein (PHISTc), unknown function	GEXP12	Previous IDs: PF11_0503	321	0	0.95531	0.0147668	-0.0125622	NA	NA	NA	19.503	19.2537	19.6624	19.8037	19.2402	19.3375	NA	NA	NA	NA	NA	NA
PF3D7_1148700	Plasmodium falciparum 3D7	Plasmodium exported protein (PHISTc), unknown function	GEXP12	Previous IDs: PF11_0503	291	0	0.95531	0.0147668	-0.0125622	NA	NA	NA	19.503	19.2537	19.6624	19.8037	19.2402	19.3375	NA	NA	NA	NA	NA	NA
PF3D7_1148700	Plasmodium falciparum 3D7	Plasmodium exported protein (PHISTc), unknown function	GEXP12	Previous IDs: PF11_0503	317	0	0.95531	0.0147668	-0.0125622	NA	NA	NA	19.503	19.2537	19.6624	19.8037	19.2402	19.3375	NA	NA	NA	NA	NA	NA
PF3D7_1148700	Plasmodium falciparum 3D7	Plasmodium exported protein (PHISTc), unknown function	GEXP12	Previous IDs: PF11_0503	287	0	0.95531	0.0147668	-0.0125622	NA	NA	NA	19.503	19.2537	19.6624	19.8037	19.2402	19.3375	NA	NA	NA	NA	NA	NA
PF3D7_1148700	Plasmodium falciparum 3D7	Plasmodium exported protein (PHISTc), unknown function	GEXP12	Previous IDs: PF11_0503	236	0	0.809316	0.0549415	-0.268579	NA	NA	NA	21.5162	23.0002	22.2582	20.1169	23.2024	22.6496	NA	NA	NA	NA	NA	NA
PF3D7_1149000	Plasmodium falciparum 3D7	antigen 332, DBL-like protein	Pf332	Previous IDs: PF11_0506;PF11_0507	245	0	NA	NA	NA	NA	NA	NA	NA	NA	NA	NA	NA	NA	NA	NA	NA	NA	NA	NA
PF3D7_1149000	Plasmodium falciparum 3D7	antigen 332, DBL-like protein	Pf332	Previous IDs: PF11_0506;PF11_0507	5692	0	0.639918	0.116651	0.0853444	NA	NA	NA	22.0476	21.6928	21.6775	21.9369	21.6681	22.0689	NA	NA	NA	NA	NA	NA
PF3D7_1149000	Plasmodium falciparum 3D7	antigen 332, DBL-like protein	Pf332	Previous IDs: PF11_0506;PF11_0507	6068	0	0.693489	0.0920807	-0.0508889	0.323238	0.178994	-0.257905	23.8029	23.749	24.0607	23.9632	23.7578	23.7387	22.3582	22.6631	22.8567	22.0364	22.4255	22.6425
PF3D7_1149000	Plasmodium falciparum 3D7	antigen 332, DBL-like protein	Pf332	Previous IDs: PF11_0506;PF11_0507	493	0	0.623834	0.121009	0.231583	0.118122	0.369777	-0.392151	21.7465	21.1734	21.5927	22.048	21.7508	21.4085	22.1166	22.4498	22.7864	22.0122	22.1393	22.0248
PF3D7_1149000	Plasmodium falciparum 3D7	antigen 332, DBL-like protein	Pf332	Previous IDs: PF11_0506;PF11_0507	5373	0	0.867998	0.0411667	-0.122876	NA	NA	NA	18.2988	19.2826	20.6088	19.417	19.4923	18.9122	NA	NA	NA	NA	NA	NA
PF3D7_1149000	Plasmodium falciparum 3D7	antigen 332, DBL-like protein	Pf332	Previous IDs: PF11_0506;PF11_0507	1846	0	NA	NA	NA	NA	NA	NA	NA	NA	NA	NA	NA	NA	NA	NA	NA	NA	NA	NA
PF3D7_1149000	Plasmodium falciparum 3D7	antigen 332, DBL-like protein	Pf332	Previous IDs: PF11_0506;PF11_0507	5984	0	NA	NA	NA	NA	NA	NA	NA	NA	NA	NA	NA	NA	NA	NA	NA	NA	NA	NA
PF3D7_1149000	Plasmodium falciparum 3D7	antigen 332, DBL-like protein	Pf332	Previous IDs: PF11_0506;PF11_0507	5983	0	NA	NA	NA	NA	NA	NA	NA	NA	NA	NA	NA	NA	NA	NA	NA	NA	NA	NA
PF3D7_1149000	Plasmodium falciparum 3D7	antigen 332, DBL-like protein	Pf332	Previous IDs: PF11_0506;PF11_0507	6061	0	0.875095	0.038708	-0.0357722	0.140709	0.317883	-0.442515	24.6816	25.1283	24.4571	24.8834	24.6377	24.6384	23.2111	23.1809	23.463	22.4566	22.8376	23.2332
PF3D7_1149000	Plasmodium falciparum 3D7	antigen 332, DBL-like protein	Pf332	Previous IDs: PF11_0506;PF11_0507	1756	0	0.00396484	1.48765	3.29001	NA	NA	NA	19.9807	19.3621	18.2211	22.5464	22.7786	22.1089	NA	NA	NA	NA	NA	NA
PF3D7_1149000	Plasmodium falciparum 3D7	antigen 332, DBL-like protein	Pf332	Previous IDs: PF11_0506;PF11_0507	5264	0	0.611201	0.127054	-0.160732	NA	NA	NA	20.5798	20.7024	20.8249	21.0149	20.0355	20.5745	NA	NA	NA	NA	NA	NA
PF3D7_1149000	Plasmodium falciparum 3D7	antigen 332, DBL-like protein	Pf332	Previous IDs: PF11_0506;PF11_0507	501	0	0.274678	0.323744	0.458498	NA	NA	NA	21.0201	20.549	20.7845	21.8068	21.2782	20.6441	NA	NA	NA	NA	NA	NA
PF3D7_1149000	Plasmodium falciparum 3D7	antigen 332, DBL-like protein	Pf332	Previous IDs: PF11_0506;PF11_0507	223	0	0.846865	0.042497	-0.0368156	0.133178	0.33581	-0.303389	20.8692	20.6046	20.3496	20.4555	20.4934	20.7641	21.8938	22.0551	22.4262	21.7622	21.8217	21.8811
PF3D7_1149000	Plasmodium falciparum 3D7	antigen 332, DBL-like protein	Pf332	Previous IDs: PF11_0506;PF11_0507	514	0	NA	NA	NA	NA	NA	NA	NA	NA	NA	NA	NA	NA	NA	NA	NA	NA	NA	NA
PF3D7_1149000	Plasmodium falciparum 3D7	antigen 332, DBL-like protein	Pf332	Previous IDs: PF11_0506;PF11_0507	6078	0	0.184096	0.425866	0.355501	NA	NA	NA	22.282	22.3856	22.7075	22.9437	22.4564	23.0415	NA	NA	NA	NA	NA	NA
PF3D7_1149100	Plasmodium falciparum 3D7	Plasmodium exported protein, unknown function	N/A	Previous IDs: PF11_0508;PF3D7_1149100.1;PF3D7_1149100.2	313	0	0.000313634	2.18831	-1.02157	NA	NA	NA	21.9455	21.6912	21.8183	20.8332	20.8561	20.7009	NA	NA	NA	NA	NA	NA
PF3D7_1149100	Plasmodium falciparum 3D7	Plasmodium exported protein, unknown function	N/A	Previous IDs: PF11_0508;PF3D7_1149100.1;PF3D7_1149100.2	407	0	0.173436	0.441551	-0.106957	NA	NA	NA	22.2433	22.1868	22.4531	22.1748	22.226	22.1615	NA	NA	NA	NA	NA	NA
PF3D7_1149100	Plasmodium falciparum 3D7	Plasmodium exported protein, unknown function	N/A	Previous IDs: PF11_0508;PF3D7_1149100.1;PF3D7_1149100.2	193	0	0.000313634	2.18831	-1.02157	NA	NA	NA	21.9455	21.6912	21.8183	20.8332	20.8561	20.7009	NA	NA	NA	NA	NA	NA
PF3D7_1149100	Plasmodium falciparum 3D7	Plasmodium exported protein, unknown function	N/A	Previous IDs: PF11_0508;PF3D7_1149100.1;PF3D7_1149100.2	445	0	NA	NA	NA	NA	NA	NA	NA	NA	NA	NA	NA	NA	NA	NA	NA	NA	NA	NA
PF3D7_1149100	Plasmodium falciparum 3D7	Plasmodium exported protein, unknown function	N/A	Previous IDs: PF11_0508;PF3D7_1149100.1;PF3D7_1149100.2	411	0	0.00106458	1.84424	-0.389008	NA	NA	NA	22.9194	22.6679	22.8535	22.484	22.2978	22.4922	NA	NA	NA	NA	NA	NA
PF3D7_1149100	Plasmodium falciparum 3D7	Plasmodium exported protein, unknown function	N/A	Previous IDs: PF11_0508;PF3D7_1149100.1;PF3D7_1149100.2	233	0	0.000313634	2.18831	-1.02157	NA	NA	NA	21.9455	21.6912	21.8183	20.8332	20.8561	20.7009	NA	NA	NA	NA	NA	NA
PF3D7_1149100	Plasmodium falciparum 3D7	Plasmodium exported protein, unknown function	N/A	Previous IDs: PF11_0508;PF3D7_1149100.1;PF3D7_1149100.2	419	0	0.901433	0.0292047	0.0183111	NA	NA	NA	20.5943	20.2271	20.5937	20.4326	20.621	20.4164	NA	NA	NA	NA	NA	NA
PF3D7_1149400	Plasmodium falciparum 3D7	Plasmodium exported protein, unknown function	N/A	Previous IDs: PF11_0511	162	0	0.00654959	1.35107	-0.774067	0.0384173	0.64306	-0.72214	23.2682	23.2789	23.2897	22.2095	22.6861	22.619	21.1212	20.6691	21.5734	20.4933	20.465	20.239
PF3D7_1149600	Plasmodium falciparum 3D7	DnaJ protein, putative	N/A	Previous IDs: PF11_0513	107	0	0.376905	0.24346	-0.0781219	NA	NA	NA	21.3783	21.4396	21.4533	21.5207	21.26	21.256	NA	NA	NA	NA	NA	NA
PF3D7_1149600	Plasmodium falciparum 3D7	DnaJ protein, putative	N/A	Previous IDs: PF11_0513	159	0	0.00248141	1.57467	-0.970679	NA	NA	NA	21.6782	21.5096	21.8469	20.5306	20.6976	20.8945	NA	NA	NA	NA	NA	NA
PF3D7_1149600	Plasmodium falciparum 3D7	DnaJ protein, putative	N/A	Previous IDs: PF11_0513	122	0	0.478977	0.18938	0.117521	0.0227259	0.776032	-1.57162	22.8125	22.7365	22.5691	22.8903	22.5682	23.0121	20.6584	21.3895	21.3066	19.3262	19.0447	20.2688
PF3D7_1200600	Plasmodium falciparum 3D7	erythrocyte membrane protein 1, PfEMP1	VAR2CSA	Previous IDs: 2277.t00006;MAL12P1.6;PFL0030c	2685	0	NA	NA	NA	NA	NA	NA	NA	NA	NA	NA	NA	NA	NA	NA	NA	NA	NA	NA
PF3D7_1200600	Plasmodium falciparum 3D7	erythrocyte membrane protein 1, PfEMP1	VAR2CSA	Previous IDs: 2277.t00006;MAL12P1.6;PFL0030c	2694	0	0.00467315	1.45299	2.77993	NA	NA	NA	17.6772	19.3183	18.6144	21.5296	21.242	21.178	NA	NA	NA	NA	NA	NA
PF3D7_1200600	Plasmodium falciparum 3D7	erythrocyte membrane protein 1, PfEMP1	VAR2CSA	Previous IDs: 2277.t00006;MAL12P1.6;PFL0030c	2950	0	NA	NA	NA	0.719752	0.0622699	0.114813	NA	NA	NA	NA	NA	NA	20.1403	20.7939	19.7747	20.3565	20.3457	20.3511
PF3D7_1200600	Plasmodium falciparum 3D7	erythrocyte membrane protein 1, PfEMP1	VAR2CSA	Previous IDs: 2277.t00006;MAL12P1.6;PFL0030c	2759	0	NA	NA	NA	0.445117	0.132123	-0.332725	NA	NA	NA	NA	NA	NA	20.002	21.3109	20.6716	20.1403	20.5173	20.3288
PF3D7_1200600	Plasmodium falciparum 3D7	erythrocyte membrane protein 1, PfEMP1	VAR2CSA	Previous IDs: 2277.t00006;MAL12P1.6;PFL0030c	2904	0	NA	NA	NA	NA	NA	NA	NA	NA	NA	NA	NA	NA	NA	NA	NA	NA	NA	NA
PF3D7_1200600	Plasmodium falciparum 3D7	erythrocyte membrane protein 1, PfEMP1	VAR2CSA	Previous IDs: 2277.t00006;MAL12P1.6;PFL0030c	2944	0	0.284924	0.3176	-0.150973	0.0256237	0.756533	0.494752	20.3279	20.5377	20.4818	20.2982	20.1161	20.4802	21.7263	21.5665	22.0458	22.2464	22.3183	22.2581
PF3D7_1200700	Plasmodium falciparum 3D7	acyl-CoA synthetase	ACS7	Previous IDs: 2277.t00007;MAL12P1.7;PFL0035c	884	0	0.177204	0.434645	0.756458	NA	NA	NA	21.8631	21.3252	21.8796	21.9232	23.2877	22.1264	NA	NA	NA	NA	NA	NA
PF3D7_1200700	Plasmodium falciparum 3D7	acyl-CoA synthetase	ACS7	Previous IDs: 2277.t00007;MAL12P1.7;PFL0035c	906	0	0.0218728	0.981648	-0.541675	NA	NA	NA	21.7062	21.4411	21.5736	20.913	21.2866	20.8963	NA	NA	NA	NA	NA	NA
PF3D7_1200700	Plasmodium falciparum 3D7	acyl-CoA synthetase	ACS7	Previous IDs: 2277.t00007;MAL12P1.7;PFL0035c	429	0	0.126204	0.52314	0.27792	NA	NA	NA	18.6127	18.6813	18.7499	18.8292	19.2364	18.8122	NA	NA	NA	NA	NA	NA
PF3D7_1200700	Plasmodium falciparum 3D7	acyl-CoA synthetase	ACS7	Previous IDs: 2277.t00007;MAL12P1.7;PFL0035c	427	0	0.380006	0.24346	0.102794	NA	NA	NA	18.4439	18.2835	18.4901	18.3502	18.5427	18.6329	NA	NA	NA	NA	NA	NA
PF3D7_1200700	Plasmodium falciparum 3D7	acyl-CoA synthetase	ACS7	Previous IDs: 2277.t00007;MAL12P1.7;PFL0035c	848	0	0.215198	0.384421	1.22407	NA	NA	NA	22.4192	22.4406	21.4713	24.8418	22.3236	22.8378	NA	NA	NA	NA	NA	NA
PF3D7_1200700	Plasmodium falciparum 3D7	acyl-CoA synthetase	ACS7	Previous IDs: 2277.t00007;MAL12P1.7;PFL0035c	880	0	0.00994496	1.2148	1.51461	NA	NA	NA	19.5344	19.3195	18.8428	20.8812	20.7229	20.6365	NA	NA	NA	NA	NA	NA
PF3D7_1200700	Plasmodium falciparum 3D7	acyl-CoA synthetase	ACS7	Previous IDs: 2277.t00007;MAL12P1.7;PFL0035c	420	0	0.281908	0.318074	-0.151297	NA	NA	NA	21.0214	20.8137	21.1081	21.0208	20.7611	20.7074	NA	NA	NA	NA	NA	NA
PF3D7_1200700	Plasmodium falciparum 3D7	acyl-CoA synthetase	ACS7	Previous IDs: 2277.t00007;MAL12P1.7;PFL0035c	876	0	0.00222245	1.6141	0.255393	0.00162635	1.43108	1.19479	20.9985	20.8529	21.1947	21.7103	21.7623	20.3397	18.9236	19.186	19.1156	20.0285	20.5021	20.2789
PF3D7_1200700	Plasmodium falciparum 3D7	acyl-CoA synthetase	ACS7	Previous IDs: 2277.t00007;MAL12P1.7;PFL0035c	888	0	0.141593	0.496438	0.486554	NA	NA	NA	22.3103	21.9172	22.422	22.4202	23.1318	22.5572	NA	NA	NA	NA	NA	NA
PF3D7_1200700	Plasmodium falciparum 3D7	acyl-CoA synthetase	ACS7	Previous IDs: 2277.t00007;MAL12P1.7;PFL0035c	876	1	0.00277091	1.54314	-2.24639	NA	NA	NA	20.427	20.6741	20.65	17.7307	18.4044	18.8768	NA	NA	NA	NA	NA	NA
PF3D7_1200700	Plasmodium falciparum 3D7	acyl-CoA synthetase	ACS7	Previous IDs: 2277.t00007;MAL12P1.7;PFL0035c	907	0	0.0218728	0.981648	-0.541675	NA	NA	NA	21.7062	21.4411	21.5736	20.913	21.2866	20.8963	NA	NA	NA	NA	NA	NA
PF3D7_1200700	Plasmodium falciparum 3D7	acyl-CoA synthetase	ACS7	Previous IDs: 2277.t00007;MAL12P1.7;PFL0035c	852	0	0.208312	0.393289	0.136511	0.348866	0.167711	0.240695	23.2455	23.268	22.9226	23.8458	23.2189	22.7808	21.9142	21.8935	21.9608	22.2434	22.2802	21.9669
PF3D7_1200700	Plasmodium falciparum 3D7	acyl-CoA synthetase	ACS7	Previous IDs: 2277.t00007;MAL12P1.7;PFL0035c	860	0	0.587773	0.135919	0.0866111	0.121594	0.363153	0.503885	25.1778	25.1561	24.8838	25.3767	25.1018	24.9991	22.5841	22.6265	22.5936	23.0133	23.5889	22.7136
PF3D7_1200800	Plasmodium falciparum 3D7	serine/threonine protein kinase, FIKK family	FIKK12	Previous IDs: 2277.t00008;MAL12P1.8;PFL0040c	77	0	NA	NA	NA	NA	NA	NA	NA	NA	NA	NA	NA	NA	NA	NA	NA	NA	NA	NA
PF3D7_1200800	Plasmodium falciparum 3D7	serine/threonine protein kinase, FIKK family	FIKK12	Previous IDs: 2277.t00008;MAL12P1.8;PFL0040c	133	0	NA	NA	NA	NA	NA	NA	NA	NA	NA	NA	NA	NA	NA	NA	NA	NA	NA	NA
PF3D7_1200800	Plasmodium falciparum 3D7	serine/threonine protein kinase, FIKK family	FIKK12	Previous IDs: 2277.t00008;MAL12P1.8;PFL0040c	456	0	0.737619	0.0770571	-0.0745803	NA	NA	NA	21.2016	20.5665	20.8841	20.9384	20.8716	20.6183	NA	NA	NA	NA	NA	NA
PF3D7_1201000	Plasmodium falciparum 3D7	Plasmodium exported protein (PHISTb), unknown function	N/A	Previous IDs: 2277.t00010;MAL12P1.10;PFL0050c	393	0	0.000234287	2.26283	0.555394	0.517578	0.104411	0.103655	24.0423	24.1779	24.0467	24.6342	24.6996	24.5993	21.251	21.4366	21.6163	21.7398	21.4555	21.4195
PF3D7_1201000	Plasmodium falciparum 3D7	Plasmodium exported protein (PHISTb), unknown function	N/A	Previous IDs: 2277.t00010;MAL12P1.10;PFL0050c	575	0	0.522069	0.166066	0.211177	NA	NA	NA	19.3589	19.1068	19.3838	19.2668	19.2876	19.9286	NA	NA	NA	NA	NA	NA
PF3D7_1201000	Plasmodium falciparum 3D7	Plasmodium exported protein (PHISTb), unknown function	N/A	Previous IDs: 2277.t00010;MAL12P1.10;PFL0050c	517	0	0.334335	0.278187	-0.360236	NA	NA	NA	20.5963	21.4182	20.6774	20.1927	20.5373	20.8812	NA	NA	NA	NA	NA	NA
PF3D7_1201000	Plasmodium falciparum 3D7	Plasmodium exported protein (PHISTb), unknown function	N/A	Previous IDs: 2277.t00010;MAL12P1.10;PFL0050c	525	0	0.553364	0.153807	0.133872	NA	NA	NA	22.2122	22.7599	22.5356	22.4503	22.8047	22.6544	NA	NA	NA	NA	NA	NA
PF3D7_1201100	Plasmodium falciparum 3D7	RESA-like protein with PHIST and DnaJ domains	N/A	Previous IDs: 2277.t00011;MAL12P1.11;PFL0055c	734	0	0.460926	0.200395	-0.162002	NA	NA	NA	21.5015	22.0009	21.6843	21.3898	21.4787	21.8322	NA	NA	NA	NA	NA	NA
PF3D7_1201100	Plasmodium falciparum 3D7	RESA-like protein with PHIST and DnaJ domains	N/A	Previous IDs: 2277.t00011;MAL12P1.11;PFL0055c	472	0	NA	NA	NA	NA	NA	NA	NA	NA	NA	NA	NA	NA	NA	NA	NA	NA	NA	NA
PF3D7_1201100	Plasmodium falciparum 3D7	RESA-like protein with PHIST and DnaJ domains	N/A	Previous IDs: 2277.t00011;MAL12P1.11;PFL0055c	450	0	NA	NA	NA	NA	NA	NA	NA	NA	NA	NA	NA	NA	NA	NA	NA	NA	NA	NA
PF3D7_1201100	Plasmodium falciparum 3D7	RESA-like protein with PHIST and DnaJ domains	N/A	Previous IDs: 2277.t00011;MAL12P1.11;PFL0055c	739	0	0.601173	0.129985	-0.171999	NA	NA	NA	21.0615	20.3898	21.0761	21.0616	20.5631	20.3866	NA	NA	NA	NA	NA	NA
PF3D7_1202600	Plasmodium falciparum 3D7	nuclear export mediator factor NEMF, putative	NEMF	Previous IDs: 2277.t00026;MAL12P1.26;PFL0130c	1304	0	NA	NA	NA	NA	NA	NA	NA	NA	NA	NA	NA	NA	NA	NA	NA	NA	NA	NA
PF3D7_1205600	Plasmodium falciparum 3D7	tetratricopeptide repeat protein, putative	N/A	Previous IDs: 2277.t00057;MAL12P1.56;PFL0280c	291	0	0.522914	0.165871	0.248639	NA	NA	NA	20.5558	20.9359	20.1756	21.2889	20.3199	20.8044	NA	NA	NA	NA	NA	NA
PF3D7_1206300	Plasmodium falciparum 3D7	conserved Plasmodium protein, unknown function	N/A	Previous IDs: 2277.t00064;MAL12P1.63;PFL0315c	378	0	NA	NA	NA	NA	NA	NA	NA	NA	NA	NA	NA	NA	NA	NA	NA	NA	NA	NA
PF3D7_1206300	Plasmodium falciparum 3D7	conserved Plasmodium protein, unknown function	N/A	Previous IDs: 2277.t00064;MAL12P1.63;PFL0315c	534	0	NA	NA	NA	0.252882	0.223292	0.158095	NA	NA	NA	NA	NA	NA	25.1257	25.0282	24.972	25.0218	25.3997	25.1787
PF3D7_1224300	Plasmodium falciparum 3D7	polyadenylate-binding protein 1, putative	PABP1	Previous IDs: 2277.t00234;MAL12P1.234;PFL1170w	717	0	NA	NA	NA	0.0353631	0.668654	-0.445689	NA	NA	NA	NA	NA	NA	21.3898	21.5074	21.6249	20.8444	21.0617	21.279
PF3D7_1226900	Plasmodium falciparum 3D7	parasitophorous vacuolar protein 2	PV2	Previous IDs: 2277.t00260;MAL12P1.260;PFL1300c	481	0	0.3882	0.23892	0.156359	NA	NA	NA	21.7679	22.0173	21.5186	21.7969	22.0516	21.9243	NA	NA	NA	NA	NA	NA
PF3D7_1226900	Plasmodium falciparum 3D7	parasitophorous vacuolar protein 2	PV2	Previous IDs: 2277.t00260;MAL12P1.260;PFL1300c	486	0	0.3882	0.23892	0.156359	NA	NA	NA	21.7679	22.0173	21.5186	21.7969	22.0516	21.9243	NA	NA	NA	NA	NA	NA
PF3D7_1239200	Plasmodium falciparum 3D7	AP2 domain transcription factor, putative	ApiAP2	Previous IDs: 2277.t00380;MAL12P1.378;PFL1900w	1821	0	0.729465	0.0796702	-0.142897	NA	NA	NA	20.8094	20.8102	20.8098	20.2783	20.2851	21.4373	NA	NA	NA	NA	NA	NA
PF3D7_1239200	Plasmodium falciparum 3D7	AP2 domain transcription factor, putative	ApiAP2	Previous IDs: 2277.t00380;MAL12P1.378;PFL1900w	1463	0	0.564698	0.147953	0.128618	NA	NA	NA	25.8577	26.5428	26.1416	26.3172	26.3931	26.2176	NA	NA	NA	NA	NA	NA
PF3D7_1248900	Plasmodium falciparum 3D7	26S protease regulatory subunit 8, putative	RPT6	Previous IDs: 2277.t00469;MAL12P1.468;PFL2345c	364	0	NA	NA	NA	0.153278	0.300924	-0.381201	NA	NA	NA	NA	NA	NA	23.4167	23.9544	23.972	23.2482	23.321	23.6303
PF3D7_1252700	Plasmodium falciparum 3D7	Plasmodium exported protein (PHISTb), unknown function	N/A	Previous IDs: 2277.t00505;MAL12P1.502;PFL2535w	364	0	NA	NA	NA	NA	NA	NA	NA	NA	NA	NA	NA	NA	NA	NA	NA	NA	NA	NA
PF3D7_1252700	Plasmodium falciparum 3D7	Plasmodium exported protein (PHISTb), unknown function	N/A	Previous IDs: 2277.t00505;MAL12P1.502;PFL2535w	437	0	0.0053772	1.40385	1.41536	NA	NA	NA	19.4458	19.5042	19.8374	20.6174	21.0111	21.4049	NA	NA	NA	NA	NA	NA
PF3D7_1252700	Plasmodium falciparum 3D7	Plasmodium exported protein (PHISTb), unknown function	N/A	Previous IDs: 2277.t00505;MAL12P1.502;PFL2535w	447	0	NA	NA	NA	NA	NA	NA	NA	NA	NA	NA	NA	NA	NA	NA	NA	NA	NA	NA
PF3D7_1253200	Plasmodium falciparum 3D7	hypothetical protein	N/A	Previous IDs: 2277.t00510;MAL12P1.507;PFL2560c	64	0	NA	NA	NA	NA	NA	NA	NA	NA	NA	NA	NA	NA	NA	NA	NA	NA	NA	NA
PF3D7_1253400	Plasmodium falciparum 3D7	acyl-CoA synthetase	ACS3	Previous IDs: 2277.t00512;MAL12P1.509;PFL2570w	531	0	0.6239	0.121009	0.30952	NA	NA	NA	20.6508	21.9914	21.3211	21.7431	22.3246	20.8243	NA	NA	NA	NA	NA	NA
PF3D7_1253400	Plasmodium falciparum 3D7	acyl-CoA synthetase	ACS3	Previous IDs: 2277.t00512;MAL12P1.509;PFL2570w	802	0	NA	NA	NA	NA	NA	NA	NA	NA	NA	NA	NA	NA	NA	NA	NA	NA	NA	NA
PF3D7_1253400	Plasmodium falciparum 3D7	acyl-CoA synthetase	ACS3	Previous IDs: 2277.t00512;MAL12P1.509;PFL2570w	745	0	0.0186784	1.01567	-0.608024	0.793606	0.0426907	-0.0900646	21.9806	22.1601	21.7707	21.0005	21.4308	21.656	21.1468	21.3156	21.2312	20.5897	21.1411	21.6925
PF3D7_1253400	Plasmodium falciparum 3D7	acyl-CoA synthetase	ACS3	Previous IDs: 2277.t00512;MAL12P1.509;PFL2570w	538	0	0.229116	0.369706	-0.0353429	NA	NA	NA	21.1225	22.0098	21.7037	21.5962	21.8784	21.2554	NA	NA	NA	NA	NA	NA
PF3D7_1253400	Plasmodium falciparum 3D7	acyl-CoA synthetase	ACS3	Previous IDs: 2277.t00512;MAL12P1.509;PFL2570w	453	0	0.790246	0.0610396	0.0829844	0.276829	0.209201	-0.186967	21.7912	22.1045	21.1819	21.8946	21.5586	21.8733	20.324	20.546	20.7681	20.3591	20.4894	20.2288
PF3D7_1253400	Plasmodium falciparum 3D7	acyl-CoA synthetase	ACS3	Previous IDs: 2277.t00512;MAL12P1.509;PFL2570w	743	0	0.00538421	1.40385	-0.712925	NA	NA	NA	20.3361	20.4118	20.2781	19.4141	19.8441	19.6291	NA	NA	NA	NA	NA	NA
PF3D7_1253400	Plasmodium falciparum 3D7	acyl-CoA synthetase	ACS3	Previous IDs: 2277.t00512;MAL12P1.509;PFL2570w	455	0	0.790246	0.0610396	0.0829844	0.276829	0.209201	-0.186967	21.7912	22.1045	21.1819	21.8946	21.5586	21.8733	20.324	20.546	20.7681	20.3591	20.4894	20.2288
PF3D7_1301400	Plasmodium falciparum 3D7	Plasmodium exported protein (hyp12), unknown function	HYP12	Previous IDs: PF13_0073	200	0	0.0663516	0.681317	0.281518	0.824496	0.0343163	-0.19577	24.0517	23.7121	23.9375	24.312	24.0364	24.1975	20.6264	20.9874	20.7329	20.9446	20.0242	20.7906
PF3D7_1301400	Plasmodium falciparum 3D7	Plasmodium exported protein (hyp12), unknown function	HYP12	Previous IDs: PF13_0073	197	0	0.176991	0.434645	0.250838	0.800188	0.0407914	0.0346008	24.7215	24.5473	24.2778	24.817	24.6049	24.8772	21.2153	21.1476	21.0799	21.3932	21.1822	20.9712
PF3D7_1301400	Plasmodium falciparum 3D7	Plasmodium exported protein (hyp12), unknown function	HYP12	Previous IDs: PF13_0073	245	1	NA	NA	NA	NA	NA	NA	NA	NA	NA	NA	NA	NA	NA	NA	NA	NA	NA	NA
PF3D7_1301400	Plasmodium falciparum 3D7	Plasmodium exported protein (hyp12), unknown function	HYP12	Previous IDs: PF13_0073	346	0	0.167601	0.452334	0.229074	NA	NA	NA	22.1156	22.1801	22.0163	22.5807	22.2618	22.1567	NA	NA	NA	NA	NA	NA
PF3D7_1301400	Plasmodium falciparum 3D7	Plasmodium exported protein (hyp12), unknown function	HYP12	Previous IDs: PF13_0073	283	0	0.507513	0.174772	0.167216	0.948811	0.00898797	0.0808586	24.482	24.4621	24.0992	24.8407	24.1968	24.5076	22.3353	22.3553	22.5297	23.1451	22.0912	22.2266
PF3D7_1301400	Plasmodium falciparum 3D7	Plasmodium exported protein (hyp12), unknown function	HYP12	Previous IDs: PF13_0073	180	0	0.772327	0.0645021	0.182587	NA	NA	NA	22.8682	23.3629	22.4039	23.4973	22.8453	22.8402	NA	NA	NA	NA	NA	NA
PF3D7_1301400	Plasmodium falciparum 3D7	Plasmodium exported protein (hyp12), unknown function	HYP12	Previous IDs: PF13_0073	248	0	0.0171151	1.0391	1.14966	NA	NA	NA	21.1945	20.9641	21.5355	22.6521	22.2452	22.2459	NA	NA	NA	NA	NA	NA
PF3D7_1301400	Plasmodium falciparum 3D7	Plasmodium exported protein (hyp12), unknown function	HYP12	Previous IDs: PF13_0073	375	0	0.360253	0.251853	1.30501	NA	NA	NA	24.2202	23.7697	26.861	27.2122	24.6284	26.9253	NA	NA	NA	NA	NA	NA
PF3D7_1301400	Plasmodium falciparum 3D7	Plasmodium exported protein (hyp12), unknown function	HYP12	Previous IDs: PF13_0073	248	1	NA	NA	NA	NA	NA	NA	NA	NA	NA	NA	NA	NA	NA	NA	NA	NA	NA	NA
PF3D7_1301400	Plasmodium falciparum 3D7	Plasmodium exported protein (hyp12), unknown function	HYP12	Previous IDs: PF13_0073	174	0	0.0833318	0.625918	0.408406	0.321558	0.178994	0.187692	23.6603	23.5145	24.0137	24.1671	24.0874	24.1592	21.9265	21.7471	21.6991	22.2484	21.9611	21.7263
PF3D7_1301400	Plasmodium falciparum 3D7	Plasmodium exported protein (hyp12), unknown function	HYP12	Previous IDs: PF13_0073	351	0	0.167601	0.452334	0.229074	NA	NA	NA	22.1156	22.1801	22.0163	22.5807	22.2618	22.1567	NA	NA	NA	NA	NA	NA
PF3D7_1301400	Plasmodium falciparum 3D7	Plasmodium exported protein (hyp12), unknown function	HYP12	Previous IDs: PF13_0073	191	0	0.409885	0.227291	0.214098	0.570173	0.0982876	0.149663	25.1457	25.4721	24.8202	25.5898	25.2422	25.2482	25.3905	25.2497	25.1571	25.4226	25.6094	25.2142
PF3D7_1301400	Plasmodium falciparum 3D7	Plasmodium exported protein (hyp12), unknown function	HYP12	Previous IDs: PF13_0073	207	0	NA	NA	NA	NA	NA	NA	NA	NA	NA	NA	NA	NA	NA	NA	NA	NA	NA	NA
PF3D7_1301400	Plasmodium falciparum 3D7	Plasmodium exported protein (hyp12), unknown function	HYP12	Previous IDs: PF13_0073	258	0	0.105478	0.562644	0.513318	NA	NA	NA	23.0776	23.5078	23.0184	23.9518	23.5902	23.6018	NA	NA	NA	NA	NA	NA
PF3D7_1301400	Plasmodium falciparum 3D7	Plasmodium exported protein (hyp12), unknown function	HYP12	Previous IDs: PF13_0073	259	0	0.242842	0.35518	0.357296	0.0549745	0.568312	1.26611	24.3076	24.6705	24.1222	24.9324	24.538	24.7017	21.934	22.7207	21.1474	23.2001	23.4205	22.9798
PF3D7_1301700	Plasmodium falciparum 3D7	CX3CL1-binding protein 2	CBP2	Previous IDs: MAL13P1.61	123	0	0.521394	0.166119	-0.218987	0.063966	0.524659	-0.442811	22.2368	21.3191	21.778	21.8482	21.551	21.2777	23.065	23.4398	23.0482	22.6965	22.5625	22.9656
PF3D7_1314200	Plasmodium falciparum 3D7	telomerase reverse transcriptase	TERT	Previous IDs: PF13_0080	1238	0	0.895602	0.0308205	-0.0422322	NA	NA	NA	24.5711	24.5712	24.5122	25.099	24.1051	24.3237	NA	NA	NA	NA	NA	NA
PF3D7_1314200	Plasmodium falciparum 3D7	telomerase reverse transcriptase	TERT	Previous IDs: PF13_0080	1235	0	0.895602	0.0308205	-0.0422322	NA	NA	NA	24.5711	24.5712	24.5122	25.099	24.1051	24.3237	NA	NA	NA	NA	NA	NA
PF3D7_1314200	Plasmodium falciparum 3D7	telomerase reverse transcriptase	TERT	Previous IDs: PF13_0080	1001	1	NA	NA	NA	NA	NA	NA	NA	NA	NA	NA	NA	NA	NA	NA	NA	NA	NA	NA
PF3D7_1320000	Plasmodium falciparum 3D7	golgi protein 1	GP1	Previous IDs: PF13_0116	756	0	NA	NA	NA	NA	NA	NA	NA	NA	NA	NA	NA	NA	NA	NA	NA	NA	NA	NA
PF3D7_1320000	Plasmodium falciparum 3D7	golgi protein 1	GP1	Previous IDs: PF13_0116	652	0	0.525136	0.164538	0.0608111	NA	NA	NA	23.0835	22.8704	23.1568	23.1165	23.1118	23.0648	NA	NA	NA	NA	NA	NA
PF3D7_1320700	Plasmodium falciparum 3D7	conserved protein, unknown function	N/A	Previous IDs: PF13_0120	601	0	NA	NA	NA	NA	NA	NA	NA	NA	NA	NA	NA	NA	NA	NA	NA	NA	NA	NA
PF3D7_1322100	Plasmodium falciparum 3D7	histone-lysine N-methyltransferase SET2	SET2	Previous IDs: MAL13P1.122	1303	0	NA	NA	NA	8.29333e-05	2.21377	-8.2892	NA	NA	NA	NA	NA	NA	27.8774	27.1082	27.1613	18.4764	19.9548	18.8481
PF3D7_1322100	Plasmodium falciparum 3D7	histone-lysine N-methyltransferase SET2	SET2	Previous IDs: MAL13P1.122	953	1	NA	NA	NA	0.00221436	1.38059	0.706607	NA	NA	NA	NA	NA	NA	21.931	22.2448	22.0879	22.7945	22.8727	22.7163
PF3D7_1328500	Plasmodium falciparum 3D7	alpha/beta-hydrolase, putative	N/A	Previous IDs: PF13_0153	469	0	0.193126	0.414728	-0.267759	NA	NA	NA	21.0837	21.4229	20.8456	20.9121	20.7872	20.8496	NA	NA	NA	NA	NA	NA
PF3D7_1334500	Plasmodium falciparum 3D7	MSP7-like protein	MSRP6	Previous IDs: PF13_0192	381	0	0.0827031	0.626328	0.294655	NA	NA	NA	18.5185	18.7142	18.91	19.1129	19.0089	18.9049	NA	NA	NA	NA	NA	NA
PF3D7_1334500	Plasmodium falciparum 3D7	MSP7-like protein	MSRP6	Previous IDs: PF13_0192	443	0	NA	NA	NA	NA	NA	NA	NA	NA	NA	NA	NA	NA	NA	NA	NA	NA	NA	NA
PF3D7_1334500	Plasmodium falciparum 3D7	MSP7-like protein	MSRP6	Previous IDs: PF13_0192	213	0	NA	NA	NA	0.00358753	1.21244	-3.13538	NA	NA	NA	NA	NA	NA	23.0033	21.6422	21.7211	18.9101	19.4685	18.5819
PF3D7_1334500	Plasmodium falciparum 3D7	MSP7-like protein	MSRP6	Previous IDs: PF13_0192	456	0	0.0875201	0.615382	0.409054	0.302728	0.193288	-0.484158	22.6538	22.2748	23.2766	23.3609	23.1249	22.9466	22.3678	23.4944	22.6231	22.2733	22.0893	22.6701
PF3D7_1334500	Plasmodium falciparum 3D7	MSP7-like protein	MSRP6	Previous IDs: PF13_0192	384	0	NA	NA	NA	0.428361	0.138376	-0.299184	NA	NA	NA	NA	NA	NA	19.5817	20.484	19.8845	19.316	19.6842	20.0525
PF3D7_1334500	Plasmodium falciparum 3D7	MSP7-like protein	MSRP6	Previous IDs: PF13_0192	444	0	0.0145121	1.08946	0.433028	0.680248	0.0743748	-0.219363	22.2924	22.0663	21.9848	22.7771	22.5413	22.3242	22.1646	22.6219	22.5131	22.2018	22.0014	22.4382
PF3D7_1334500	Plasmodium falciparum 3D7	MSP7-like protein	MSRP6	Previous IDs: PF13_0192	238	0	0.0875506	0.615382	0.62382	0.99189	0.00295854	0.00506861	20.6601	20.617	20.4872	21.4645	21.0948	21.0765	19.7873	21.1063	21.0844	20.7458	20.9129	20.3344
PF3D7_1334500	Plasmodium falciparum 3D7	MSP7-like protein	MSRP6	Previous IDs: PF13_0192	389	0	0.998528	0.000639685	0.00104444	NA	NA	NA	23.0453	23.1138	23.0346	23.3423	23.8164	22.0382	NA	NA	NA	NA	NA	NA
PF3D7_1334500	Plasmodium falciparum 3D7	MSP7-like protein	MSRP6	Previous IDs: PF13_0192	196	0	NA	NA	NA	0.613697	0.0840165	0.0359804	NA	NA	NA	NA	NA	NA	19.0125	18.9346	18.9735	18.9024	19.0095	19.1167
PF3D7_1334500	Plasmodium falciparum 3D7	MSP7-like protein	MSRP6	Previous IDs: PF13_0192	242	0	0.101904	0.569169	0.705766	NA	NA	NA	21.338	21.3179	20.6742	22.2091	21.6912	21.5472	NA	NA	NA	NA	NA	NA
PF3D7_1334500	Plasmodium falciparum 3D7	MSP7-like protein	MSRP6	Previous IDs: PF13_0192	460	0	0.694417	0.0920807	0.229691	0.0560959	0.562371	-0.706787	22.2813	22.0107	23.6732	23.2284	22.7635	22.6623	22.076	22.4046	22.4585	21.5618	21.6222	21.6346
PF3D7_1334500	Plasmodium falciparum 3D7	MSP7-like protein	MSRP6	Previous IDs: PF13_0192	459	0	0.694417	0.0920807	0.229691	0.234102	0.247661	-0.512911	22.2813	22.0107	23.6732	23.2284	22.7635	22.6623	22.3597	23.5489	22.5925	22.2362	22.3528	22.3734
PF3D7_1334500	Plasmodium falciparum 3D7	MSP7-like protein	MSRP6	Previous IDs: PF13_0192	397	0	0.974758	0.00797886	-0.0404325	0.0111919	0.919978	-0.220236	23.3533	23.477	23.2587	23.1997	23.8326	22.9353	23.4334	23.3937	23.346	23.1751	23.2422	23.0951
PF3D7_1334500	Plasmodium falciparum 3D7	MSP7-like protein	MSRP6	Previous IDs: PF13_0192	36	0	0.0568715	0.732001	-0.609086	NA	NA	NA	21.6603	21.6121	21.6362	21.0271	20.63	21.4242	NA	NA	NA	NA	NA	NA
PF3D7_1334500	Plasmodium falciparum 3D7	MSP7-like protein	MSRP6	Previous IDs: PF13_0192	434	0	0.0236002	0.968658	0.35316	0.638864	0.081011	-0.111278	21.1349	21.037	20.5132	20.9707	21.4861	21.2876	21.704	22.1679	21.936	21.9001	21.6095	21.9644
PF3D7_1334500	Plasmodium falciparum 3D7	MSP7-like protein	MSRP6	Previous IDs: PF13_0192	248	0	0.4511	0.206548	0.155902	0.556298	0.0982876	-0.516833	21.9471	22.0245	22.1525	22.455	21.949	22.1878	22.5916	22.6111	22.6084	22.1748	22.7498	21.336
PF3D7_1353100	Plasmodium falciparum 3D7	Plasmodium exported protein, unknown function	N/A	Previous IDs: PF13_0275	253	0	NA	NA	NA	NA	NA	NA	NA	NA	NA	NA	NA	NA	NA	NA	NA	NA	NA	NA
PF3D7_1353100	Plasmodium falciparum 3D7	Plasmodium exported protein, unknown function	N/A	Previous IDs: PF13_0275	117	0	0.00922766	1.2401	2.02668	0.0306864	0.693741	1.50175	19.4555	19.4782	18.2811	21.0782	21.4016	20.8151	20.7605	21.2201	20.5856	21.5733	22.4977	23.0004
PF3D7_1354300	Plasmodium falciparum 3D7	large subunit rRNA methyltransferase, putative	N/A	Previous IDs: PF13_0286	583	0	0.596715	0.131294	-0.145746	NA	NA	NA	21.2233	21.0611	20.6363	21.0396	20.9824	20.4613	NA	NA	NA	NA	NA	NA
PF3D7_1354300	Plasmodium falciparum 3D7	large subunit rRNA methyltransferase, putative	N/A	Previous IDs: PF13_0286	589	0	NA	NA	NA	NA	NA	NA	NA	NA	NA	NA	NA	NA	NA	NA	NA	NA	NA	NA
PF3D7_1359600	Plasmodium falciparum 3D7	conserved Plasmodium protein, unknown function	N/A	Previous IDs: MAL13P1.295	722	0	NA	NA	NA	NA	NA	NA	NA	NA	NA	NA	NA	NA	NA	NA	NA	NA	NA	NA
PF3D7_1365000	Plasmodium falciparum 3D7	conserved Plasmodium protein, unknown function	N/A	Previous IDs: PF13_0342	120	0	NA	NA	NA	NA	NA	NA	NA	NA	NA	NA	NA	NA	NA	NA	NA	NA	NA	NA
PF3D7_1367700	Plasmodium falciparum 3D7	alanine--tRNA ligase	AlaRS	Previous IDs: PF13_0354	1235	0	0.220033	0.377086	0.138914	0.00934112	0.978013	-0.781728	21.316	21.1277	21.2219	21.3608	21.4971	21.2245	20.4928	20.935	20.9579	19.9493	20.1521	19.9392
PF3D7_1367700	Plasmodium falciparum 3D7	alanine--tRNA ligase	AlaRS	Previous IDs: PF13_0354	667	1	NA	NA	NA	NA	NA	NA	NA	NA	NA	NA	NA	NA	NA	NA	NA	NA	NA	NA
PF3D7_1371900	Plasmodium falciparum 3D7	Plasmodium exported protein, unknown function	N/A	Previous IDs: MAL13P1.465	74	0	0.517926	0.168508	-0.16554	0.0604497	0.541045	0.436228	21.9218	22.3254	21.9651	21.8598	21.8266	22.0292	20.8265	20.9419	21.3572	21.3947	21.5615	21.4781
PF3D7_1371900	Plasmodium falciparum 3D7	Plasmodium exported protein, unknown function	N/A	Previous IDs: MAL13P1.465	58	0	0.0186496	1.01567	0.409004	NA	NA	NA	23.6457	23.7065	23.4972	24.1736	23.8727	24.0302	NA	NA	NA	NA	NA	NA
PF3D7_1371900	Plasmodium falciparum 3D7	Plasmodium exported protein, unknown function	N/A	Previous IDs: MAL13P1.465	71	0	0.924266	0.0239655	-0.0342622	NA	NA	NA	23.7651	23.0701	22.8763	23.5802	22.8776	23.151	NA	NA	NA	NA	NA	NA
PF3D7_1371900	Plasmodium falciparum 3D7	Plasmodium exported protein, unknown function	N/A	Previous IDs: MAL13P1.465	79	0	0.906462	0.0292047	-0.0432289	NA	NA	NA	21.6611	22.7468	21.8868	22.2535	21.9384	21.9731	NA	NA	NA	NA	NA	NA
PF3D7_1372300	Plasmodium falciparum 3D7	Plasmodium exported protein (PHIST), unknown function	N/A	N/A	134	0	0.249138	0.348227	-0.109659	NA	NA	NA	21.2342	20.9961	21.1024	20.9754	21.0859	20.9424	NA	NA	NA	NA	NA	NA
PF3D7_1372400	Plasmodium falciparum 3D7	acyl-CoA synthetase	ACS4	Previous IDs: MAL13P1.485	455	0	0.790246	0.0610396	0.0829844	0.276829	0.209201	-0.186967	21.7912	22.1045	21.1819	21.8946	21.5586	21.8733	20.324	20.546	20.7681	20.3591	20.4894	20.2288
PF3D7_1372400	Plasmodium falciparum 3D7	acyl-CoA synthetase	ACS4	Previous IDs: MAL13P1.485	531	0	0.6239	0.121009	0.30952	NA	NA	NA	20.6508	21.9914	21.3211	21.7431	22.3246	20.8243	NA	NA	NA	NA	NA	NA
PF3D7_1372400	Plasmodium falciparum 3D7	acyl-CoA synthetase	ACS4	Previous IDs: MAL13P1.485	538	0	0.229116	0.369706	-0.0353429	NA	NA	NA	21.1225	22.0098	21.7037	21.5962	21.8784	21.2554	NA	NA	NA	NA	NA	NA
PF3D7_1372400	Plasmodium falciparum 3D7	acyl-CoA synthetase	ACS4	Previous IDs: MAL13P1.485	453	0	0.790246	0.0610396	0.0829844	0.276829	0.209201	-0.186967	21.7912	22.1045	21.1819	21.8946	21.5586	21.8733	20.324	20.546	20.7681	20.3591	20.4894	20.2288
PF3D7_1401200	Plasmodium falciparum 3D7	Plasmodium exported protein, unknown function	N/A	Previous IDs: PF14_0014	144	0	0.813104	0.0541829	-0.0481169	NA	NA	NA	20.8837	20.4937	20.6887	20.3385	20.8414	20.7419	NA	NA	NA	NA	NA	NA
PF3D7_1401200	Plasmodium falciparum 3D7	Plasmodium exported protein, unknown function	N/A	Previous IDs: PF14_0014	79	0	0.638748	0.116888	-0.420451	NA	NA	NA	19.325	19.3681	19.282	17.4692	18.9046	20.34	NA	NA	NA	NA	NA	NA
PF3D7_1401200	Plasmodium falciparum 3D7	Plasmodium exported protein, unknown function	N/A	Previous IDs: PF14_0014	117	0	0.811378	0.0546831	0.0602244	NA	NA	NA	21.798	21.2234	21.7878	21.7555	21.8473	21.3871	NA	NA	NA	NA	NA	NA
PF3D7_1401200	Plasmodium falciparum 3D7	Plasmodium exported protein, unknown function	N/A	Previous IDs: PF14_0014	60	0	0.116285	0.545775	0.221072	NA	NA	NA	22.8517	23.0832	23.4324	24.1576	24.1944	21.6786	NA	NA	NA	NA	NA	NA
PF3D7_1401200	Plasmodium falciparum 3D7	Plasmodium exported protein, unknown function	N/A	Previous IDs: PF14_0014	136	0	0.536698	0.164519	0.00480227	0.873432	0.0243094	-0.0370427	24.1977	24.2988	24.5925	24.4182	24.3588	24.3265	22.2617	21.5279	21.4801	21.7358	21.8071	21.6157
PF3D7_1403000	Plasmodium falciparum 3D7	radial spoke protein 3, putative	N/A	Previous IDs: PF14_0030	426	1	0.439048	0.213456	-0.139732	NA	NA	NA	24.1499	24.3547	23.9452	24.0102	23.8164	24.204	NA	NA	NA	NA	NA	NA
PF3D7_1410400	Plasmodium falciparum 3D7	rhoptry-associated protein 1	RAP1	Previous IDs: PF14_0102	159	0	NA	NA	NA	NA	NA	NA	NA	NA	NA	NA	NA	NA	NA	NA	NA	NA	NA	NA
PF3D7_1410400	Plasmodium falciparum 3D7	rhoptry-associated protein 1	RAP1	Previous IDs: PF14_0102	130	0	0.776933	0.063686	-0.128772	NA	NA	NA	22.3868	21.9195	23.0899	22.214	21.9698	22.8259	NA	NA	NA	NA	NA	NA
PF3D7_1410400	Plasmodium falciparum 3D7	rhoptry-associated protein 1	RAP1	Previous IDs: PF14_0102	151	0	NA	NA	NA	NA	NA	NA	NA	NA	NA	NA	NA	NA	NA	NA	NA	NA	NA	NA
PF3D7_1412500	Plasmodium falciparum 3D7	actin II	ACT2	Previous IDs: PF14_0124	327	1	NA	NA	NA	NA	NA	NA	NA	NA	NA	NA	NA	NA	NA	NA	NA	NA	NA	NA
PF3D7_1419400	Plasmodium falciparum 3D7	conserved Plasmodium membrane protein, unknown function	N/A	Previous IDs: PF14_0188	781	0	0.916597	0.0252054	-0.0145689	0.0644793	0.523877	-0.406318	23.4692	23.9166	23.7024	23.6462	23.7145	23.6839	26.5492	26.2249	26.3828	25.7238	26.1512	26.0629
PF3D7_1420100	Plasmodium falciparum 3D7	conserved Plasmodium protein, unknown function	N/A	Previous IDs: PF14_0195	1161	1	0.0106215	1.19275	-0.391032	NA	NA	NA	21.0002	20.9194	21.0777	20.481	20.6081	20.7351	NA	NA	NA	NA	NA	NA
PF3D7_1423700	Plasmodium falciparum 3D7	conserved Plasmodium protein, unknown function	N/A	Previous IDs: PF14_0228	313	0	NA	NA	NA	NA	NA	NA	NA	NA	NA	NA	NA	NA	NA	NA	NA	NA	NA	NA
PF3D7_1423700	Plasmodium falciparum 3D7	conserved Plasmodium protein, unknown function	N/A	Previous IDs: PF14_0228	16	0	NA	NA	NA	0.577047	0.0973708	-0.107888	NA	NA	NA	NA	NA	NA	20.9279	20.4934	20.9688	20.5995	20.8734	20.5935
PF3D7_1426100	Plasmodium falciparum 3D7	transcription factor BTF3, putative	BTF3	Previous IDs: PF14_0241	118	0	0.00066038	2.0076	-2.3446	NA	NA	NA	20.6848	21.0655	20.4061	18.449	18.5928	18.0809	NA	NA	NA	NA	NA	NA
PF3D7_1434600	Plasmodium falciparum 3D7	methionine aminopeptidase 2	METAP2	Previous IDs: PF14_0327	130	0	0.000244186	2.26283	5.20555	NA	NA	NA	18.9573	19.3623	20.1079	25.011	24.8448	24.1883	NA	NA	NA	NA	NA	NA
PF3D7_1436300	Plasmodium falciparum 3D7	translocon component PTEX150	PTEX150	Previous IDs: PF14_0344;Pf112	915	0	0.8384	0.0450819	0.0590244	0.73845	0.0602819	-0.126498	22.8575	22.3313	22.3986	22.4194	23.0152	22.3299	21.692	21.5035	21.0897	21.7089	21.4926	20.7042
PF3D7_1436300	Plasmodium falciparum 3D7	translocon component PTEX150	PTEX150	Previous IDs: PF14_0344;Pf112	607	0	0.097278	0.581321	0.302845	NA	NA	NA	20.6665	20.229	20.4477	20.857	20.6441	20.7506	NA	NA	NA	NA	NA	NA
PF3D7_1445400	Plasmodium falciparum 3D7	protein serine/threonine kinase-1	CLK1	Previous IDs: PF14_0431	220	0	NA	NA	NA	0.396288	0.150053	-0.701548	NA	NA	NA	NA	NA	NA	24.2081	22.0172	23.1349	22.3175	23.1255	21.8125
PF3D7_1445400	Plasmodium falciparum 3D7	protein serine/threonine kinase-1	CLK1	Previous IDs: PF14_0431	232	0	NA	NA	NA	0.396288	0.150053	-0.701548	NA	NA	NA	NA	NA	NA	24.2081	22.0172	23.1349	22.3175	23.1255	21.8125
PF3D7_1446200	Plasmodium falciparum 3D7	M17 leucyl aminopeptidase	LAP	Previous IDs: PF14_0439	540	0	NA	NA	NA	0.0953772	0.423091	-0.407299	NA	NA	NA	NA	NA	NA	21.0725	20.8764	20.6804	20.2106	20.4691	20.7277
PF3D7_1454400	Plasmodium falciparum 3D7	aminopeptidase P	APP	Previous IDs: PF14_0517	684	1	NA	NA	NA	NA	NA	NA	NA	NA	NA	NA	NA	NA	NA	NA	NA	NA	NA	NA
PF3D7_1454400	Plasmodium falciparum 3D7	aminopeptidase P	APP	Previous IDs: PF14_0517	698	1	NA	NA	NA	NA	NA	NA	NA	NA	NA	NA	NA	NA	NA	NA	NA	NA	NA	NA
PF3D7_1462400	Plasmodium falciparum 3D7	conserved Plasmodium protein, unknown function	N/A	Previous IDs: PF14_0594	2191	1	NA	NA	NA	NA	NA	NA	NA	NA	NA	NA	NA	NA	NA	NA	NA	NA	NA	NA
PF3D7_1464500	Plasmodium falciparum 3D7	conserved Plasmodium membrane protein, unknown function	N/A	Previous IDs: PF14_0613	1186	0	NA	NA	NA	0.483406	0.112491	-0.144983	NA	NA	NA	NA	NA	NA	21.3987	21.015	21.1637	21.0475	20.7858	21.3092
PF3D7_1476200	Plasmodium falciparum 3D7	Plasmodium exported protein (PHISTb), unknown function	N/A	Previous IDs: PF14_0730;PF14_0731	223	0	NA	NA	NA	NA	NA	NA	NA	NA	NA	NA	NA	NA	NA	NA	NA	NA	NA	NA
PF3D7_1476200	Plasmodium falciparum 3D7	Plasmodium exported protein (PHISTb), unknown function	N/A	Previous IDs: PF14_0730;PF14_0731	194	0	0.824803	0.0496655	-0.0755072	NA	NA	NA	23.2301	23.4038	23.0687	22.9411	23.359	23.1759	NA	NA	NA	NA	NA	NA
PF3D7_1476200	Plasmodium falciparum 3D7	Plasmodium exported protein (PHISTb), unknown function	N/A	Previous IDs: PF14_0730;PF14_0731	199	0	0.742811	0.0753345	-0.119712	NA	NA	NA	21.7181	21.9381	22.2173	22.1295	22.1628	21.222	NA	NA	NA	NA	NA	NA
PF3D7_1476200	Plasmodium falciparum 3D7	Plasmodium exported protein (PHISTb), unknown function	N/A	Previous IDs: PF14_0730;PF14_0731	205	0	0.411577	0.22654	-0.298261	NA	NA	NA	20.3076	20.3719	20.5235	19.9982	20.2505	20.0595	NA	NA	NA	NA	NA	NA
PF3D7_1476200	Plasmodium falciparum 3D7	Plasmodium exported protein (PHISTb), unknown function	N/A	Previous IDs: PF14_0730;PF14_0731	231	0	NA	NA	NA	NA	NA	NA	NA	NA	NA	NA	NA	NA	NA	NA	NA	NA	NA	NA
PF3D7_1476200	Plasmodium falciparum 3D7	Plasmodium exported protein (PHISTb), unknown function	N/A	Previous IDs: PF14_0730;PF14_0731	210	0	0.742811	0.0753345	-0.119712	NA	NA	NA	21.7181	21.9381	22.2173	22.1295	22.1628	21.222	NA	NA	NA	NA	NA	NA
PF3D7_1476200	Plasmodium falciparum 3D7	Plasmodium exported protein (PHISTb), unknown function	N/A	Previous IDs: PF14_0730;PF14_0731	189	0	0.949152	0.0157349	-0.0264489	NA	NA	NA	22.6533	22.9841	22.545	22.581	22.8783	22.6437	NA	NA	NA	NA	NA	NA
PF3D7_1477500	Plasmodium falciparum 3D7	Plasmodium exported protein (PHISTb), unknown function	N/A	Previous IDs: PF14_0746	484	0	0.187619	0.421784	0.281265	0.0497823	0.582043	0.202372	21.8585	22.2515	21.9482	22.3586	22.0991	22.4442	21.1594	21.3977	21.2785	21.4809	21.4398	21.522
PF3D7_1477500	Plasmodium falciparum 3D7	Plasmodium exported protein (PHISTb), unknown function	N/A	Previous IDs: PF14_0746	328	0	0.0657737	0.682476	0.152611	0.430876	0.13779	-0.156445	23.9614	24.0155	23.9977	24.2604	24.0984	24.0735	23.6111	23.6768	24.1634	23.7238	23.672	23.5863
PF3D7_1477500	Plasmodium falciparum 3D7	Plasmodium exported protein (PHISTb), unknown function	N/A	Previous IDs: PF14_0746	313	0	0.110148	0.549224	-0.554408	NA	NA	NA	20.284	20.5987	20.1963	19.8052	20.2241	19.3864	NA	NA	NA	NA	NA	NA
PF3D7_1477500	Plasmodium falciparum 3D7	Plasmodium exported protein (PHISTb), unknown function	N/A	Previous IDs: PF14_0746	351	0	0.779333	0.0631228	0.0866644	0.0455752	0.604608	-0.393188	24.5928	25.4316	24.6415	25.168	24.9154	24.8426	24.0738	23.7699	24.02	23.4528	23.7615	23.4699
PF3D7_1477500	Plasmodium falciparum 3D7	Plasmodium exported protein (PHISTb), unknown function	N/A	Previous IDs: PF14_0746	493	0	0.399782	0.232468	0.112951	NA	NA	NA	22.2988	21.9628	22.3026	22.3831	22.2518	22.2681	NA	NA	NA	NA	NA	NA
PF3D7_1477500	Plasmodium falciparum 3D7	Plasmodium exported protein (PHISTb), unknown function	N/A	Previous IDs: PF14_0746	389	0	NA	NA	NA	NA	NA	NA	NA	NA	NA	NA	NA	NA	NA	NA	NA	NA	NA	NA
PF3D7_1477500	Plasmodium falciparum 3D7	Plasmodium exported protein (PHISTb), unknown function	N/A	Previous IDs: PF14_0746	393	0	0.496197	0.180961	-0.196109	NA	NA	NA	21.2695	20.449	21.0654	20.8865	20.5772	20.7319	NA	NA	NA	NA	NA	NA
PF3D7_1477500	Plasmodium falciparum 3D7	Plasmodium exported protein (PHISTb), unknown function	N/A	Previous IDs: PF14_0746	343	0	0.469103	0.193821	-0.227642	0.181092	0.284912	-0.202818	23.7609	23.5911	23.2941	23.4346	23.2312	23.2974	22.6118	22.5794	22.4654	22.1122	22.6324	22.3036
PF3D7_1477500	Plasmodium falciparum 3D7	Plasmodium exported protein (PHISTb), unknown function	N/A	Previous IDs: PF14_0746	326	0	0.112217	0.549224	0.225514	NA	NA	NA	21.4944	21.158	21.2078	21.5836	21.4922	21.4609	NA	NA	NA	NA	NA	NA
PF3D7_1478600	Plasmodium falciparum 3D7	EMP1-trafficking protein	PTP3	Previous IDs: PF14_0758	923	0	NA	NA	NA	NA	NA	NA	NA	NA	NA	NA	NA	NA	NA	NA	NA	NA	NA	NA
PF3D7_1478600	Plasmodium falciparum 3D7	EMP1-trafficking protein	PTP3	Previous IDs: PF14_0758	284	0	0.373507	0.244549	0.158969	NA	NA	NA	19.1475	18.8912	19.4038	19.4064	19.2066	19.3065	NA	NA	NA	NA	NA	NA
PF3D7_1478600	Plasmodium falciparum 3D7	EMP1-trafficking protein	PTP3	Previous IDs: PF14_0758	262	0	0.00264449	1.55938	0.637645	0.00145782	1.45144	2.34979	20.0888	20.3651	20.2269	20.9564	20.7727	20.8646	19.0567	19.5355	20.0179	22.1142	21.7232	21.822
PF3D7_1478600	Plasmodium falciparum 3D7	EMP1-trafficking protein	PTP3	Previous IDs: PF14_0758	868	0	0.000566495	2.02672	1.72145	0.000198508	2.03012	1.29803	20.0459	19.8093	20.0538	22.4981	21.287	21.2882	20.3841	20.5107	20.6873	21.7328	21.8735	21.87
PF3D7_1478600	Plasmodium falciparum 3D7	EMP1-trafficking protein	PTP3	Previous IDs: PF14_0758	583	0	NA	NA	NA	NA	NA	NA	NA	NA	NA	NA	NA	NA	NA	NA	NA	NA	NA	NA
PF3D7_1478600	Plasmodium falciparum 3D7	EMP1-trafficking protein	PTP3	Previous IDs: PF14_0758	848	0	NA	NA	NA	NA	NA	NA	NA	NA	NA	NA	NA	NA	NA	NA	NA	NA	NA	NA
PF3D7_1478600	Plasmodium falciparum 3D7	EMP1-trafficking protein	PTP3	Previous IDs: PF14_0758	595	0	0.000244611	2.26283	1.46235	1.54509e-07	4.44984	1.86316	22.6093	22.9579	22.5267	24.2446	23.8419	24.3945	22.7549	22.4621	22.0261	24.1488	24.1534	24.5303
PF3D7_1478600	Plasmodium falciparum 3D7	EMP1-trafficking protein	PTP3	Previous IDs: PF14_0758	1149	0	0.533428	0.164519	0.181314	0.00937224	0.978013	0.819912	22.5279	22.7273	21.9195	22.412	22.5254	22.7813	21.9021	21.7069	21.6353	22.2793	22.8127	22.612
PF3D7_1478600	Plasmodium falciparum 3D7	EMP1-trafficking protein	PTP3	Previous IDs: PF14_0758	290	0	0.00590277	1.37994	1.79032	NA	NA	NA	18.1546	18.4083	19.2165	20.1869	20.4821	20.4813	NA	NA	NA	NA	NA	NA
PF3D7_1478600	Plasmodium falciparum 3D7	EMP1-trafficking protein	PTP3	Previous IDs: PF14_0758	533	0	0.0029813	1.52325	0.675381	NA	NA	NA	19.9919	19.7251	19.6997	20.5723	20.4135	20.4571	NA	NA	NA	NA	NA	NA
PF3D7_1478600	Plasmodium falciparum 3D7	EMP1-trafficking protein	PTP3	Previous IDs: PF14_0758	467	0	NA	NA	NA	NA	NA	NA	NA	NA	NA	NA	NA	NA	NA	NA	NA	NA	NA	NA
PF3D7_1478600	Plasmodium falciparum 3D7	EMP1-trafficking protein	PTP3	Previous IDs: PF14_0758	233	0	0.00340614	1.48765	1.02638	0.00792277	1.01023	2.03108	20.8829	20.8404	21.2706	21.9585	22.2067	21.908	19.8879	19.1456	18.754	21.6075	21.4613	20.812
PF3D7_1478600	Plasmodium falciparum 3D7	EMP1-trafficking protein	PTP3	Previous IDs: PF14_0758	257	0	1.57541e-05	3.2021	0.620337	0.0547525	0.568312	4.66121	22.67	22.8214	22.7655	23.4703	23.3118	23.3358	18.4215	19.7098	19.0105	20.3219	25.4341	25.3695
PF3D7_1478600	Plasmodium falciparum 3D7	EMP1-trafficking protein	PTP3	Previous IDs: PF14_0758	421	0	NA	NA	NA	NA	NA	NA	NA	NA	NA	NA	NA	NA	NA	NA	NA	NA	NA	NA
PF3D7_1478600	Plasmodium falciparum 3D7	EMP1-trafficking protein	PTP3	Previous IDs: PF14_0758	1128	0	0.885101	0.0351326	-0.0344353	NA	NA	NA	23.3212	23.5353	22.8008	23.2709	23.0984	23.1846	NA	NA	NA	NA	NA	NA
PF3D7_1478600	Plasmodium falciparum 3D7	EMP1-trafficking protein	PTP3	Previous IDs: PF14_0758	537	0	NA	NA	NA	NA	NA	NA	NA	NA	NA	NA	NA	NA	NA	NA	NA	NA	NA	NA
PF3D7_1478600	Plasmodium falciparum 3D7	EMP1-trafficking protein	PTP3	Previous IDs: PF14_0758	301	0	0.00658796	1.35107	0.688768	NA	NA	NA	19.4743	19.5072	19.4908	20.0389	20.0553	20.4444	NA	NA	NA	NA	NA	NA
PF3D7_1478600	Plasmodium falciparum 3D7	EMP1-trafficking protein	PTP3	Previous IDs: PF14_0758	389	0	0.102396	0.569169	0.951361	NA	NA	NA	20.6351	21.9023	21.1813	22.0404	22.156	22.3764	NA	NA	NA	NA	NA	NA
PF3D7_1478600	Plasmodium falciparum 3D7	EMP1-trafficking protein	PTP3	Previous IDs: PF14_0758	1151	0	0.533428	0.164519	0.181314	0.00937224	0.978013	0.819912	22.5279	22.7273	21.9195	22.412	22.5254	22.7813	21.9021	21.7069	21.6353	22.2793	22.8127	22.612
PF3D7_1478600	Plasmodium falciparum 3D7	EMP1-trafficking protein	PTP3	Previous IDs: PF14_0758	876	0	0.0221229	0.980944	3.00911	NA	NA	NA	19.1987	18.6171	19.3228	23.6542	21.2471	21.2647	NA	NA	NA	NA	NA	NA
PF3D7_1478600	Plasmodium falciparum 3D7	EMP1-trafficking protein	PTP3	Previous IDs: PF14_0758	1011	0	NA	NA	NA	0.325886	0.178994	0.958369	NA	NA	NA	NA	NA	NA	16.7412	19.5048	18.9618	19.2293	19.216	19.6376
PF3D7_1478600	Plasmodium falciparum 3D7	EMP1-trafficking protein	PTP3	Previous IDs: PF14_0758	279	0	NA	NA	NA	NA	NA	NA	NA	NA	NA	NA	NA	NA	NA	NA	NA	NA	NA	NA
PF3D7_1478600	Plasmodium falciparum 3D7	EMP1-trafficking protein	PTP3	Previous IDs: PF14_0758	1163	0	NA	NA	NA	NA	NA	NA	NA	NA	NA	NA	NA	NA	NA	NA	NA	NA	NA	NA
PF3D7_1478600	Plasmodium falciparum 3D7	EMP1-trafficking protein	PTP3	Previous IDs: PF14_0758	918	0	NA	NA	NA	NA	NA	NA	NA	NA	NA	NA	NA	NA	NA	NA	NA	NA	NA	NA
PF3D7_1478600	Plasmodium falciparum 3D7	EMP1-trafficking protein	PTP3	Previous IDs: PF14_0758	211	0	NA	NA	NA	0.00859876	0.990737	2.50515	NA	NA	NA	NA	NA	NA	19.2604	19.4552	17.8516	21.3085	21.6034	21.1708
PF3D7_1478600	Plasmodium falciparum 3D7	EMP1-trafficking protein	PTP3	Previous IDs: PF14_0758	417	0	0.0029813	1.52325	0.675381	NA	NA	NA	19.9919	19.7251	19.6997	20.5723	20.4135	20.4571	NA	NA	NA	NA	NA	NA
PF3D7_1478600	Plasmodium falciparum 3D7	EMP1-trafficking protein	PTP3	Previous IDs: PF14_0758	548	0	0.0395648	0.826319	0.267051	NA	NA	NA	21.2409	21.2707	21.312	21.4122	21.5073	21.7052	NA	NA	NA	NA	NA	NA
PF3D7_1478600	Plasmodium falciparum 3D7	EMP1-trafficking protein	PTP3	Previous IDs: PF14_0758	429	0	0.0410531	0.813206	1.05725	NA	NA	NA	20.2572	20.0393	19.1532	20.8662	21.0717	20.6836	NA	NA	NA	NA	NA	NA
PF3D7_1478600	Plasmodium falciparum 3D7	EMP1-trafficking protein	PTP3	Previous IDs: PF14_0758	545	0	0.0410531	0.813206	1.05725	NA	NA	NA	20.2572	20.0393	19.1532	20.8662	21.0717	20.6836	NA	NA	NA	NA	NA	NA
PF3D7_1478600	Plasmodium falciparum 3D7	EMP1-trafficking protein	PTP3	Previous IDs: PF14_0758	218	0	0.0270239	0.935408	0.514391	0.00137684	1.46202	2.16572	21.9978	21.7367	21.7707	22.596	22.2766	22.1758	19.0688	19.7132	19.1191	21.5024	21.5124	21.3834
PF3D7_1478600	Plasmodium falciparum 3D7	EMP1-trafficking protein	PTP3	Previous IDs: PF14_0758	1019	0	0.023385	0.969405	-0.492882	0.0343625	0.677603	0.533089	22.7043	22.3578	22.6211	22.0673	21.9122	22.225	21.5577	21.9232	21.9787	22.5369	22.1716	22.3505
PF3D7_1478600	Plasmodium falciparum 3D7	EMP1-trafficking protein	PTP3	Previous IDs: PF14_0758	333	0	0.710865	0.0874404	-0.0461222	NA	NA	NA	20.8558	20.9966	20.7991	20.9942	20.8669	20.652	NA	NA	NA	NA	NA	NA
PF3D7_1478600	Plasmodium falciparum 3D7	EMP1-trafficking protein	PTP3	Previous IDs: PF14_0758	357	0	NA	NA	NA	NA	NA	NA	NA	NA	NA	NA	NA	NA	NA	NA	NA	NA	NA	NA
PF3D7_1478600	Plasmodium falciparum 3D7	EMP1-trafficking protein	PTP3	Previous IDs: PF14_0758	268	0	0.0200745	1.00037	0.971351	0.0718651	0.497713	1.06297	18.5422	18.2894	19.1533	19.5863	19.7127	19.6	18.9796	18.4733	17.8018	19.1425	19.2787	20.0224
PF3D7_1478600	Plasmodium falciparum 3D7	EMP1-trafficking protein	PTP3	Previous IDs: PF14_0758	479	0	0.000244611	2.26283	1.46235	1.54509e-07	4.44984	1.86316	22.6093	22.9579	22.5267	24.2446	23.8419	24.3945	22.7549	22.4621	22.0261	24.1488	24.1534	24.5303
PF3D7_1478600	Plasmodium falciparum 3D7	EMP1-trafficking protein	PTP3	Previous IDs: PF14_0758	209	0	0.00165073	1.70314	0.635563	0.00580165	1.10059	-0.375212	21.8913	21.4936	21.7816	22.3605	22.3897	22.3231	20.7997	21.5562	20.8465	20.6733	20.3659	21.0375
PF3D7_1478600	Plasmodium falciparum 3D7	EMP1-trafficking protein	PTP3	Previous IDs: PF14_0758	1016	0	0.218117	0.380059	0.375971	NA	NA	NA	18.4506	18.5129	17.7525	18.7571	18.469	18.6178	NA	NA	NA	NA	NA	NA
PF3D7_1478600	Plasmodium falciparum 3D7	EMP1-trafficking protein	PTP3	Previous IDs: PF14_0758	432	0	0.0395648	0.826319	0.267051	NA	NA	NA	21.2409	21.2707	21.312	21.4122	21.5073	21.7052	NA	NA	NA	NA	NA	NA
PF3D7_1479000	Plasmodium falciparum 3D7	acyl-CoA synthetase	ACS1a	Previous IDs: PF14_0761	747	0	0.00538421	1.40385	-0.712925	NA	NA	NA	20.3361	20.4118	20.2781	19.4141	19.8441	19.6291	NA	NA	NA	NA	NA	NA
PF3D7_1479000	Plasmodium falciparum 3D7	acyl-CoA synthetase	ACS1a	Previous IDs: PF14_0761	806	0	NA	NA	NA	NA	NA	NA	NA	NA	NA	NA	NA	NA	NA	NA	NA	NA	NA	NA
PF3D7_1479000	Plasmodium falciparum 3D7	acyl-CoA synthetase	ACS1a	Previous IDs: PF14_0761	749	0	0.0186784	1.01567	-0.608024	0.793606	0.0426907	-0.0900646	21.9806	22.1601	21.7707	21.0005	21.4308	21.656	21.1468	21.3156	21.2312	20.5897	21.1411	21.6925
PF3D7_1479000	Plasmodium falciparum 3D7	acyl-CoA synthetase	ACS1a	Previous IDs: PF14_0761	542	0	0.096347	0.583395	-0.380206	NA	NA	NA	21.5942	22.0282	22.0863	21.4493	21.4321	21.6865	NA	NA	NA	NA	NA	NA
Q00013	Homo sapiens (Human)	55 kDa erythrocyte membrane protein (p55) (Membrane protein, palmitoylated 1)	MPP1 DXS552E EMP55	0	91	0	NA	NA	NA	NA	NA	NA	NA	NA	NA	NA	NA	NA	NA	NA	NA	NA	NA	NA
Q00013	Homo sapiens (Human)	55 kDa erythrocyte membrane protein (p55) (Membrane protein, palmitoylated 1)	MPP1 DXS552E EMP55	0	141	0	0.689094	0.0936059	0.232633	NA	NA	NA	21.7589	21.1746	19.9775	21.4307	20.9753	21.203	NA	NA	NA	NA	NA	NA
Q00013	Homo sapiens (Human)	55 kDa erythrocyte membrane protein (p55) (Membrane protein, palmitoylated 1)	MPP1 DXS552E EMP55	0	258	0	NA	NA	NA	NA	NA	NA	NA	NA	NA	NA	NA	NA	NA	NA	NA	NA	NA	NA
Q00688	Homo sapiens (Human)	Peptidyl-prolyl cis-trans isomerase FKBP3 (PPIase FKBP3) (EC 5.2.1.8) (25 kDa FK506-binding protein) (25 kDa FKBP) (FKBP-25) (FK506-binding protein 3) (FKBP-3) (Immunophilin FKBP25) (Rapamycin-selective 25 kDa immunophilin) (Rotamase)	FKBP3 FKBP25	0	170	0	NA	NA	NA	NA	NA	NA	NA	NA	NA	NA	NA	NA	NA	NA	NA	NA	NA	NA
Q00688	Homo sapiens (Human)	Peptidyl-prolyl cis-trans isomerase FKBP3 (PPIase FKBP3) (EC 5.2.1.8) (25 kDa FK506-binding protein) (25 kDa FKBP) (FKBP-25) (FK506-binding protein 3) (FKBP-3) (Immunophilin FKBP25) (Rapamycin-selective 25 kDa immunophilin) (Rotamase)	FKBP3 FKBP25	0	80	0	NA	NA	NA	NA	NA	NA	NA	NA	NA	NA	NA	NA	NA	NA	NA	NA	NA	NA
Q00688	Homo sapiens (Human)	Peptidyl-prolyl cis-trans isomerase FKBP3 (PPIase FKBP3) (EC 5.2.1.8) (25 kDa FK506-binding protein) (25 kDa FKBP) (FKBP-25) (FK506-binding protein 3) (FKBP-3) (Immunophilin FKBP25) (Rapamycin-selective 25 kDa immunophilin) (Rotamase)	FKBP3 FKBP25	0	86	0	0.879964	0.0368484	-0.0596389	NA	NA	NA	20.0917	20.9591	20.5521	19.9804	20.9232	20.5204	NA	NA	NA	NA	NA	NA
Q01518	Homo sapiens (Human)	Adenylyl cyclase-associated protein 1 (CAP 1)	CAP1 CAP	0	298	0	NA	NA	NA	NA	NA	NA	NA	NA	NA	NA	NA	NA	NA	NA	NA	NA	NA	NA
Q01518	Homo sapiens (Human)	Adenylyl cyclase-associated protein 1 (CAP 1)	CAP1 CAP	0	282	0	0.420339	0.220635	-0.865722	NA	NA	NA	19.8822	20.5212	20.2368	17.4687	20.08	20.4943	NA	NA	NA	NA	NA	NA
Q04760	Homo sapiens (Human)	Lactoylglutathione lyase (EC 4.4.1.5) (Aldoketomutase) (Glyoxalase I) (Glx I) (Ketone-aldehyde mutase) (Methylglyoxalase) (S-D-lactoylglutathione methylglyoxal lyase)	GLO1	0	157	0	0.616043	0.124919	0.170624	NA	NA	NA	21.2316	21.3768	21.4798	21.7721	21.9019	20.9261	NA	NA	NA	NA	NA	NA
Q04760	Homo sapiens (Human)	Lactoylglutathione lyase (EC 4.4.1.5) (Aldoketomutase) (Glyoxalase I) (Glx I) (Ketone-aldehyde mutase) (Methylglyoxalase) (S-D-lactoylglutathione methylglyoxal lyase)	GLO1	0	159	0	0.616043	0.124919	0.170624	NA	NA	NA	21.2316	21.3768	21.4798	21.7721	21.9019	20.9261	NA	NA	NA	NA	NA	NA
Q06830	Homo sapiens (Human)	Peroxiredoxin-1 (EC 1.11.1.24) (Natural killer cell-enhancing factor A) (NKEF-A) (Proliferation-associated gene protein) (PAG) (Thioredoxin peroxidase 2) (Thioredoxin-dependent peroxide reductase 2) (Thioredoxin-dependent peroxiredoxin 1)	PRDX1 PAGA PAGB TDPX2	0	192	0	NA	NA	NA	NA	NA	NA	NA	NA	NA	NA	NA	NA	NA	NA	NA	NA	NA	NA
Q06830	Homo sapiens (Human)	Peroxiredoxin-1 (EC 1.11.1.24) (Natural killer cell-enhancing factor A) (NKEF-A) (Proliferation-associated gene protein) (PAG) (Thioredoxin peroxidase 2) (Thioredoxin-dependent peroxide reductase 2) (Thioredoxin-dependent peroxiredoxin 1)	PRDX1 PAGA PAGB TDPX2	0	197	0	NA	NA	NA	NA	NA	NA	NA	NA	NA	NA	NA	NA	NA	NA	NA	NA	NA	NA
Q07866	Homo sapiens (Human)	Kinesin light chain 1 (KLC 1)	KLC1 KLC KNS2	0	287	0	NA	NA	NA	0.206353	0.265586	1.86111	NA	NA	NA	NA	NA	NA	28.2766	25.1901	29.2988	29.4834	29.4607	29.4048
Q07866	Homo sapiens (Human)	Kinesin light chain 1 (KLC 1)	KLC1 KLC KNS2	0	329	0	NA	NA	NA	0.159933	0.300924	0.298952	NA	NA	NA	NA	NA	NA	24.0017	24.1809	24.2544	24.5169	24.672	24.1449
Q08495	Homo sapiens (Human)	Dematin (Dematin actin-binding protein) (Erythrocyte membrane protein band 4.9)	DMTN DMT EPB49	0	89	0	0.759192	0.0671804	-0.0468808	NA	NA	NA	22.5485	22.7945	22.3026	22.475	22.5282	22.5016	NA	NA	NA	NA	NA	NA
Q08495	Homo sapiens (Human)	Dematin (Dematin actin-binding protein) (Erythrocyte membrane protein band 4.9)	DMTN DMT EPB49	0	160	0	NA	NA	NA	NA	NA	NA	NA	NA	NA	NA	NA	NA	NA	NA	NA	NA	NA	NA
Q08495	Homo sapiens (Human)	Dematin (Dematin actin-binding protein) (Erythrocyte membrane protein band 4.9)	DMTN DMT EPB49	0	254	0	0.255138	0.342134	-0.0234643	0.115469	0.369777	-0.270419	24.5476	24.8975	24.844	24.5113	24.8213	24.8862	23.5979	23.8474	23.7943	23.4266	23.4461	23.5557
Q08495	Homo sapiens (Human)	Dematin (Dematin actin-binding protein) (Erythrocyte membrane protein band 4.9)	DMTN DMT EPB49	0	33	0	0.854246	0.041792	-0.117002	0.0969064	0.418463	0.197109	23.3081	23.4218	21.8173	22.9952	22.135	23.0659	22.9892	22.6397	22.8256	23.0548	23.0153	22.9758
Q08495	Homo sapiens (Human)	Dematin (Dematin actin-binding protein) (Erythrocyte membrane protein band 4.9)	DMTN DMT EPB49	0	6	0	0.0130805	1.12797	-0.585726	0.739904	0.0601078	0.0888119	23.3081	22.9746	23.3065	22.7578	22.5977	22.4766	22.0532	22.1167	22.2913	22.5546	22.4005	21.7725
Q08495	Homo sapiens (Human)	Dematin (Dematin actin-binding protein) (Erythrocyte membrane protein band 4.9)	DMTN DMT EPB49	0	286	0	0.0149512	1.07869	-0.125759	0.346397	0.167711	-0.208785	26.3963	26.4825	26.4872	26.3555	26.4168	26.2165	25.8191	25.5126	25.7853	25.5788	25.3202	25.5916
Q08495	Homo sapiens (Human)	Dematin (Dematin actin-binding protein) (Erythrocyte membrane protein band 4.9)	DMTN DMT EPB49	0	250	0	0.0197193	1.00575	-0.246959	0.677196	0.0743748	-0.0403036	23.702	24.1412	23.8059	23.3677	23.6724	23.8682	22.7774	22.8651	23.1428	22.741	22.8856	23.0378
Q08495	Homo sapiens (Human)	Dematin (Dematin actin-binding protein) (Erythrocyte membrane protein band 4.9)	DMTN DMT EPB49	0	259	0	0.0664459	0.681317	-0.192322	0.317325	0.180986	-0.219428	22.6744	22.3131	22.2513	22.2713	22.0963	22.2942	21.8304	22.2897	22.0221	21.5625	22.0298	21.8917
Q08495	Homo sapiens (Human)	Dematin (Dematin actin-binding protein) (Erythrocyte membrane protein band 4.9)	DMTN DMT EPB49	0	243	0	0.372865	0.244702	-0.0934422	0.255806	0.222341	-0.321161	25.3437	25.0328	25.2015	25.1453	25.0917	25.0607	23.3601	23.6681	23.8815	23.6938	23.1134	23.139
Q12955	Homo sapiens (Human)	Ankyrin-3 (ANK-3) (Ankyrin-G)	ANK3	0	3123	1	NA	NA	NA	NA	NA	NA	NA	NA	NA	NA	NA	NA	NA	NA	NA	NA	NA	NA
Q13177	Homo sapiens (Human)	Serine/threonine-protein kinase PAK 2 (EC 2.7.11.1) (Gamma-PAK) (PAK65) (S6/H4 kinase) (p21-activated kinase 2) (PAK-2) (p58) [Cleaved into: PAK-2p27 (p27); PAK-2p34 (p34) (C-t-PAK2)]	PAK2	0	52	0	0.243399	0.354893	0.646901	0.726156	0.0614027	-0.322568	23.4094	24.9936	24.5653	24.9729	24.9827	24.9534	21.7682	23.9178	23.7398	23.4647	21.8077	23.1858
Q13404	Homo sapiens (Human)	Ubiquitin-conjugating enzyme E2 variant 1 (UEV-1) (CROC-1) (TRAF6-regulated IKK activator 1 beta Uev1A)	UBE2V1 CROC1 UBE2V UEV1 P/OKcl.19	0	10	0	0.499383	0.179729	0.0851978	0.170414	0.300093	0.175958	24.7017	24.5533	24.706	24.736	24.9192	24.5614	22.7979	23.0384	23.03	23.1314	23.2526	23.0101
Q13404	Homo sapiens (Human)	Ubiquitin-conjugating enzyme E2 variant 1 (UEV-1) (CROC-1) (TRAF6-regulated IKK activator 1 beta Uev1A)	UBE2V1 CROC1 UBE2V UEV1 P/OKcl.19	0	135	0	NA	NA	NA	NA	NA	NA	NA	NA	NA	NA	NA	NA	NA	NA	NA	NA	NA	NA
Q13442	Homo sapiens (Human)	28 kDa heat- and acid-stable phosphoprotein (PDGF-associated protein) (PAP) (PDGFA-associated protein 1) (PAP1)	PDAP1 HASPP28	0	181	0	0.0252972	0.953071	1.9908	0.48707	0.111691	-0.306292	19.2006	18.8304	19.8816	21.2746	21.7122	20.8982	20.061	20.8026	20.4318	20.3186	20.5909	19.4669
Q13442	Homo sapiens (Human)	28 kDa heat- and acid-stable phosphoprotein (PDGF-associated protein) (PAP) (PDGFA-associated protein 1) (PAP1)	PDAP1 HASPP28	0	132	0	0.253489	0.344086	0.246334	NA	NA	NA	21.3467	21.4721	21.4432	21.3204	21.7504	21.9302	NA	NA	NA	NA	NA	NA
Q13442	Homo sapiens (Human)	28 kDa heat- and acid-stable phosphoprotein (PDGF-associated protein) (PAP) (PDGFA-associated protein 1) (PAP1)	PDAP1 HASPP28	0	75	0	0.559469	0.150521	0.0753814	NA	NA	NA	21.2336	21.1517	21.1927	21.2077	21.2717	21.3247	NA	NA	NA	NA	NA	NA
Q13442	Homo sapiens (Human)	28 kDa heat- and acid-stable phosphoprotein (PDGF-associated protein) (PAP) (PDGFA-associated protein 1) (PAP1)	PDAP1 HASPP28	0	137	0	NA	NA	NA	NA	NA	NA	NA	NA	NA	NA	NA	NA	NA	NA	NA	NA	NA	NA
Q13765	Homo sapiens (Human)	Nascent polypeptide-associated complex subunit alpha (NAC-alpha) (Alpha-NAC) (allergen Hom s 2)	NACA HSD48	0	100	0	NA	NA	NA	NA	NA	NA	NA	NA	NA	NA	NA	NA	NA	NA	NA	NA	NA	NA
Q14247	Homo sapiens (Human)	Src substrate cortactin (Amplaxin) (Oncogene EMS1)	CTTN EMS1	0	110	0	NA	NA	NA	NA	NA	NA	NA	NA	NA	NA	NA	NA	NA	NA	NA	NA	NA	NA
Q14847	Homo sapiens (Human)	LIM and SH3 domain protein 1 (LASP-1) (Metastatic lymph node gene 50 protein) (MLN 50)	LASP1 MLN50	0	27	0	0.581875	0.138844	0.272718	0.591425	0.0914521	-0.289407	22.6345	23.1892	22.2722	23.0203	23.5858	22.3079	23.0576	22.5747	22.0918	21.5724	22.9966	22.2868
Q14847	Homo sapiens (Human)	LIM and SH3 domain protein 1 (LASP-1) (Metastatic lymph node gene 50 protein) (MLN 50)	LASP1 MLN50	0	17	0	0.581875	0.138844	0.272718	0.591425	0.0914521	-0.289407	22.6345	23.1892	22.2722	23.0203	23.5858	22.3079	23.0576	22.5747	22.0918	21.5724	22.9966	22.2868
Q14847	Homo sapiens (Human)	LIM and SH3 domain protein 1 (LASP-1) (Metastatic lymph node gene 50 protein) (MLN 50)	LASP1 MLN50	0	96	0	0.637924	0.116983	-0.0788056	NA	NA	NA	21.8479	21.9159	21.8058	21.8482	21.487	21.998	NA	NA	NA	NA	NA	NA
Q14847	Homo sapiens (Human)	LIM and SH3 domain protein 1 (LASP-1) (Metastatic lymph node gene 50 protein) (MLN 50)	LASP1 MLN50	0	128	0	0.00694439	1.33081	0.621285	NA	NA	NA	19.7818	19.7647	19.7732	20.6288	20.3332	20.2214	NA	NA	NA	NA	NA	NA
Q14847	Homo sapiens (Human)	LIM and SH3 domain protein 1 (LASP-1) (Metastatic lymph node gene 50 protein) (MLN 50)	LASP1 MLN50	0	75	0	0.775995	0.063778	-0.0728789	NA	NA	NA	20.6859	20.3078	20.3318	20.6615	19.9718	20.4735	NA	NA	NA	NA	NA	NA
Q14847	Homo sapiens (Human)	LIM and SH3 domain protein 1 (LASP-1) (Metastatic lymph node gene 50 protein) (MLN 50)	LASP1 MLN50	0	23	0	0.810686	0.0546831	0.111441	0.106586	0.392748	1.68446	23.0973	23.437	23.0952	23.2247	23.6589	23.0802	20.8013	21.1588	22.0075	22.9696	22.6946	23.3568
Q15819	Homo sapiens (Human)	Ubiquitin-conjugating enzyme E2 variant 2 (DDVit 1) (Enterocyte differentiation-associated factor 1) (EDAF-1) (Enterocyte differentiation-promoting factor 1) (EDPF-1) (MMS2 homolog) (Vitamin D3-inducible protein)	UBE2V2 MMS2 UEV2	0	8	0	0.779491	0.0631228	-0.0472522	0.281696	0.206687	-0.263435	23.3341	23.2358	23.7284	23.3423	23.3342	23.48	21.7186	21.7171	22.2679	21.8423	21.4857	21.5853
Q15819	Homo sapiens (Human)	Ubiquitin-conjugating enzyme E2 variant 2 (DDVit 1) (Enterocyte differentiation-associated factor 1) (EDAF-1) (Enterocyte differentiation-promoting factor 1) (EDPF-1) (MMS2 homolog) (Vitamin D3-inducible protein)	UBE2V2 MMS2 UEV2	0	133	0	NA	NA	NA	NA	NA	NA	NA	NA	NA	NA	NA	NA	NA	NA	NA	NA	NA	NA
Q15836	Homo sapiens (Human)	Vesicle-associated membrane protein 3 (VAMP-3) (Cellubrevin) (CEB) (Synaptobrevin-3)	VAMP3 SYB3	0	35	0	0.768427	0.0645021	-0.112616	NA	NA	NA	20.9003	20.7074	21.4885	21.0276	20.4084	21.3224	NA	NA	NA	NA	NA	NA
Q16143	Homo sapiens (Human)	Beta-synuclein	SNCB	0	34	0	NA	NA	NA	0.491637	0.1097	-0.273768	NA	NA	NA	NA	NA	NA	25.3852	25.7305	25.2179	25.5674	25.4273	24.5175
Q16543	Homo sapiens (Human)	Hsp90 co-chaperone Cdc37 (Hsp90 chaperone protein kinase-targeting subunit) (p50Cdc37) [Cleaved into: Hsp90 co-chaperone Cdc37, N-terminally processed]	CDC37 CDC37A	0	121	0	NA	NA	NA	0.0589486	0.54364	-0.481182	NA	NA	NA	NA	NA	NA	21.5041	21.0196	21.2619	20.693	21.0542	20.5948
Q2KJY2	Homo sapiens (Human)	Kinesin-like protein KIF26B	KIF26B	0	1433	0	NA	NA	NA	NA	NA	NA	NA	NA	NA	NA	NA	NA	NA	NA	NA	NA	NA	NA
Q2KJY2	Homo sapiens (Human)	Kinesin-like protein KIF26B	KIF26B	0	1432	0	NA	NA	NA	NA	NA	NA	NA	NA	NA	NA	NA	NA	NA	NA	NA	NA	NA	NA
Q2KJY2	Homo sapiens (Human)	Kinesin-like protein KIF26B	KIF26B	0	1436	0	NA	NA	NA	NA	NA	NA	NA	NA	NA	NA	NA	NA	NA	NA	NA	NA	NA	NA
Q38SD2	Homo sapiens (Human)	Leucine-rich repeat serine/threonine-protein kinase 1 (EC 2.7.11.1)	LRRK1 KIAA1790	0	651	1	0.771494	0.0645021	0.11011	NA	NA	NA	22.7937	22.5593	22.6765	22.5783	23.4655	22.316	NA	NA	NA	NA	NA	NA
Q58FG1	Homo sapiens (Human)	Putative heat shock protein HSP 90-alpha A4 (Heat shock 90 kDa protein 1 alpha-like 2) (Heat shock protein 90-alpha D) (Heat shock protein 90Ad)	HSP90AA4P HSP90AD HSPCAL2	0	303	0	NA	NA	NA	0.639586	0.081011	0.0749621	NA	NA	NA	NA	NA	NA	20.2705	20.3046	20.2364	20.5999	20.3455	20.0911
Q5QJ74	Homo sapiens (Human)	Tubulin-specific chaperone cofactor E-like protein (EL) (Leucine-rich repeat-containing protein 35)	TBCEL LRRC35	0	329	0	0.578725	0.139742	0.150111	NA	NA	NA	21.5805	20.9865	20.9273	21.3149	21.0801	21.5497	NA	NA	NA	NA	NA	NA
Q6DN14	Homo sapiens (Human)	Multiple C2 and transmembrane domain-containing protein 1	MCTP1	0	544	0	0.177906	0.433734	-0.888746	NA	NA	NA	21.5626	22.9372	23.1838	21.9254	21.2667	21.8252	NA	NA	NA	NA	NA	NA
Q6PB30	Homo sapiens (Human)	Putative chondrosarcoma-associated gene 1 protein (Cancer/testis antigen 24.1) (CT24.1) (Cancer/testis antigen CSAGE)	CSAG1 CSAGE	0	35	1	NA	NA	NA	NA	NA	NA	NA	NA	NA	NA	NA	NA	NA	NA	NA	NA	NA	NA
Q7RTP6	Homo sapiens (Human)	[F-actin]-monooxygenase MICAL3 (EC 1.14.13.225) (Molecule interacting with CasL protein 3) (MICAL-3)	MICAL3 KIAA0819 KIAA1364	0	1381	0	NA	NA	NA	NA	NA	NA	NA	NA	NA	NA	NA	NA	NA	NA	NA	NA	NA	NA
Q8IYD1	Homo sapiens (Human)	Eukaryotic peptide chain release factor GTP-binding subunit ERF3B (Eukaryotic peptide chain release factor subunit 3b) (eRF3b) (G1 to S phase transition protein 2 homolog)	GSPT2 ERF3B	0	292	0	NA	NA	NA	NA	NA	NA	NA	NA	NA	NA	NA	NA	NA	NA	NA	NA	NA	NA
Q8IYL2	Homo sapiens (Human)	Probable tRNA (uracil-O(2)-)-methyltransferase (EC 2.1.1.211) (Methyltransferase-like protein 19)	TRMT44 C4orf23 METTL19	0	699	1	NA	NA	NA	NA	NA	NA	NA	NA	NA	NA	NA	NA	NA	NA	NA	NA	NA	NA
Q8N3C0	Homo sapiens (Human)	Activating signal cointegrator 1 complex subunit 3 (EC 3.6.4.12) (ASC-1 complex subunit p200) (ASC1p200) (Helicase, ATP binding 1) (Trip4 complex subunit p200)	ASCC3 HELIC1	0	60	0	NA	NA	NA	NA	NA	NA	NA	NA	NA	NA	NA	NA	NA	NA	NA	NA	NA	NA
Q8NE71	Homo sapiens (Human)	ATP-binding cassette sub-family F member 1 (ATP-binding cassette 50) (TNF-alpha-stimulated ABC protein)	ABCF1 ABC50	0	347	0	NA	NA	NA	NA	NA	NA	NA	NA	NA	NA	NA	NA	NA	NA	NA	NA	NA	NA
Q8NE71	Homo sapiens (Human)	ATP-binding cassette sub-family F member 1 (ATP-binding cassette 50) (TNF-alpha-stimulated ABC protein)	ABCF1 ABC50	0	342	0	0.488266	0.184324	0.123344	NA	NA	NA	19.3927	19.9288	19.6608	19.7841	19.8658	19.7024	NA	NA	NA	NA	NA	NA
Q8NG31	Homo sapiens (Human)	Kinetochore scaffold 1 (ALL1-fused gene from chromosome 15q14 protein) (AF15q14) (Bub-linking kinetochore protein) (Blinkin) (Cancer susceptibility candidate gene 5 protein) (Cancer/testis antigen 29) (CT29) (Kinetochore-null protein 1) (Protein CASC5) (Protein D40/AF15q14)	KNL1 CASC5 KIAA1570	0	1976	0	NA	NA	NA	NA	NA	NA	NA	NA	NA	NA	NA	NA	NA	NA	NA	NA	NA	NA
Q8NHG7	Homo sapiens (Human)	Small VCP/p97-interacting protein	SVIP	0	56	0	0.0393766	0.826319	-0.50866	NA	NA	NA	21.0964	20.8527	20.9745	20.7315	20.2002	20.4659	NA	NA	NA	NA	NA	NA
Q8NHG7	Homo sapiens (Human)	Small VCP/p97-interacting protein	SVIP	0	59	0	0.0393766	0.826319	-0.50866	NA	NA	NA	21.0964	20.8527	20.9745	20.7315	20.2002	20.4659	NA	NA	NA	NA	NA	NA
Q8TBX8	Homo sapiens (Human)	Phosphatidylinositol 5-phosphate 4-kinase type-2 gamma (EC 2.7.1.149) (Phosphatidylinositol 5-phosphate 4-kinase type II gamma) (PI(5)P 4-kinase type II gamma) (PIP4KII-gamma)	PIP4K2C PIP5K2C	0	390	0	0.434019	0.216286	-0.218149	NA	NA	NA	19.9898	19.9683	20.1266	19.3389	19.9222	20.1692	NA	NA	NA	NA	NA	NA
Q8WW12	Homo sapiens (Human)	PEST proteolytic signal-containing nuclear protein (PCNP) (PEST-containing nuclear protein)	PCNP	0	70	0	0.631737	0.120639	-0.126952	NA	NA	NA	22.2838	22.6768	22.5558	22.2733	22.4787	22.3835	NA	NA	NA	NA	NA	NA
Q93009	Homo sapiens (Human)	Ubiquitin carboxyl-terminal hydrolase 7 (EC 3.4.19.12) (Deubiquitinating enzyme 7) (Herpesvirus-associated ubiquitin-specific protease) (Ubiquitin thioesterase 7) (Ubiquitin-specific-processing protease 7)	USP7 HAUSP	0	1096	0	0.561708	0.149278	-0.0780889	NA	NA	NA	22.5287	22.2772	22.666	22.3931	22.3408	22.5037	NA	NA	NA	NA	NA	NA
Q96A49	Homo sapiens (Human)	Synapse-associated protein 1 (BSD domain-containing signal transducer and Akt interactor protein) (BSTA)	SYAP1 PRO3113	0	119	0	0.421607	0.220635	0.317191	NA	NA	NA	19.3316	18.6634	18.244	19.1168	18.7644	19.3094	NA	NA	NA	NA	NA	NA
Q96A49	Homo sapiens (Human)	Synapse-associated protein 1 (BSD domain-containing signal transducer and Akt interactor protein) (BSTA)	SYAP1 PRO3113	0	118	0	0.421607	0.220635	0.317191	NA	NA	NA	19.3316	18.6634	18.244	19.1168	18.7644	19.3094	NA	NA	NA	NA	NA	NA
Q96A72	Homo sapiens (Human)	Protein mago nashi homolog 2	MAGOHB MAGOH2	0	43	0	0.371495	0.245036	0.216988	NA	NA	NA	21.197	20.6578	21.1946	21.4457	21.2244	21.0303	NA	NA	NA	NA	NA	NA
Q96DL1	Homo sapiens (Human)	NXPE family member 2 (Protein FAM55B)	NXPE2 FAM55B	0	40	1	0.787497	0.0610396	-0.0980653	NA	NA	NA	21.6192	22.2909	21.955	21.4869	21.6789	22.405	NA	NA	NA	NA	NA	NA
Q96DL1	Homo sapiens (Human)	NXPE family member 2 (Protein FAM55B)	NXPE2 FAM55B	0	21	1	0.787497	0.0610396	-0.0980653	NA	NA	NA	21.6192	22.2909	21.955	21.4869	21.6789	22.405	NA	NA	NA	NA	NA	NA
Q99733	Homo sapiens (Human)	Nucleosome assembly protein 1-like 4 (Nucleosome assembly protein 2) (NAP-2)	NAP1L4 NAP2	0	140	0	0.132554	0.510618	0.534804	NA	NA	NA	21.4683	21.1249	21.8252	22.3662	21.6784	21.9782	NA	NA	NA	NA	NA	NA
Q99808	Homo sapiens (Human)	Equilibrative nucleoside transporter 1 (Equilibrative nitrobenzylmercaptopurine riboside-sensitive nucleoside transporter) (Equilibrative NBMPR-sensitive nucleoside transporter) (Nucleoside transporter, es-type) (Solute carrier family 29 member 1)	SLC29A1 ENT1	0	255	0	0.392716	0.236779	-0.295736	0.28174	0.206687	-0.160874	23.0434	23.4263	23.3726	22.7674	23.1818	23.0058	22.4707	22.4715	22.2619	22.4293	22.2405	22.0516
Q9BR77	Homo sapiens (Human)	Coiled-coil domain-containing protein 77	CCDC77	0	64	1	0.125651	0.523415	0.287914	NA	NA	NA	22.5454	22.6513	22.2482	22.9437	22.6666	22.6984	NA	NA	NA	NA	NA	NA
Q9BZA5	Homo sapiens (Human)	Putative gamma-taxilin 2 (Gamma-taxilin 2 pseudogene) (Taxilin gamma pseudogene, Y-linked)	TXLNGY CYorf15A CYorf15B TXLNG2P	0	92	0	NA	NA	NA	0.159933	0.300924	0.298952	NA	NA	NA	NA	NA	NA	24.0017	24.1809	24.2544	24.5169	24.672	24.1449
Q9BZI7	Homo sapiens (Human)	Regulator of nonsense transcripts 3B (Nonsense mRNA reducing factor 3B) (Up-frameshift suppressor 3 homolog B) (hUpf3B) (Up-frameshift suppressor 3 homolog on chromosome X) (hUpf3p-X)	UPF3B RENT3B UPF3X	0	195	0	NA	NA	NA	NA	NA	NA	NA	NA	NA	NA	NA	NA	NA	NA	NA	NA	NA	NA
Q9BZI7	Homo sapiens (Human)	Regulator of nonsense transcripts 3B (Nonsense mRNA reducing factor 3B) (Up-frameshift suppressor 3 homolog B) (hUpf3B) (Up-frameshift suppressor 3 homolog on chromosome X) (hUpf3p-X)	UPF3B RENT3B UPF3X	0	421	1	NA	NA	NA	NA	NA	NA	NA	NA	NA	NA	NA	NA	NA	NA	NA	NA	NA	NA
Q9BZI7	Homo sapiens (Human)	Regulator of nonsense transcripts 3B (Nonsense mRNA reducing factor 3B) (Up-frameshift suppressor 3 homolog B) (hUpf3B) (Up-frameshift suppressor 3 homolog on chromosome X) (hUpf3p-X)	UPF3B RENT3B UPF3X	0	418	1	NA	NA	NA	NA	NA	NA	NA	NA	NA	NA	NA	NA	NA	NA	NA	NA	NA	NA
Q9BZK3	Homo sapiens (Human)	Putative nascent polypeptide-associated complex subunit alpha-like protein (Alpha-NAC pseudogene 1) (NAC-alpha pseudogene 1) (NACA family member 4, pseudogene)	NACA4P NACAP1 FKSG17	0	99	0	NA	NA	NA	NA	NA	NA	NA	NA	NA	NA	NA	NA	NA	NA	NA	NA	NA	NA
Q9H0B6	Homo sapiens (Human)	Kinesin light chain 2 (KLC 2)	KLC2	0	272	0	NA	NA	NA	0.206353	0.265586	1.86111	NA	NA	NA	NA	NA	NA	28.2766	25.1901	29.2988	29.4834	29.4607	29.4048
Q9H0B6	Homo sapiens (Human)	Kinesin light chain 2 (KLC 2)	KLC2	0	314	0	NA	NA	NA	0.159933	0.300924	0.298952	NA	NA	NA	NA	NA	NA	24.0017	24.1809	24.2544	24.5169	24.672	24.1449
Q9H4M9	Homo sapiens (Human)	EH domain-containing protein 1 (PAST homolog 1) (hPAST1) (Testilin)	EHD1 PAST PAST1 CDABP0131	0	509	0	NA	NA	NA	NA	NA	NA	NA	NA	NA	NA	NA	NA	NA	NA	NA	NA	NA	NA
Q9H910	Homo sapiens (Human)	Jupiter microtubule associated homolog 2 (Hematological and neurological expressed 1-like protein) (HN1-like protein)	JPT2 C16orf34 HN1L L11	0	67	0	NA	NA	NA	NA	NA	NA	NA	NA	NA	NA	NA	NA	NA	NA	NA	NA	NA	NA
Q9H910	Homo sapiens (Human)	Jupiter microtubule associated homolog 2 (Hematological and neurological expressed 1-like protein) (HN1-like protein)	JPT2 C16orf34 HN1L L11	0	90	0	0.789381	0.0610396	0.0729178	NA	NA	NA	21.824	22.071	22.6388	22.0838	22.3226	22.346	NA	NA	NA	NA	NA	NA
Q9NSK7	Homo sapiens (Human)	Protein C19orf12	C19orf12	0	31	1	NA	NA	NA	NA	NA	NA	NA	NA	NA	NA	NA	NA	NA	NA	NA	NA	NA	NA
Q9NTK5	Homo sapiens (Human)	Obg-like ATPase 1 (DNA damage-regulated overexpressed in cancer 45) (DOC45) (GTP-binding protein 9)	OLA1 GTPBP9 PRO2455 PTD004	0	394	0	0.45649	0.202461	-0.148926	NA	NA	NA	19.4739	19.7221	19.898	19.6796	19.6836	19.284	NA	NA	NA	NA	NA	NA
Q9NTK5	Homo sapiens (Human)	Obg-like ATPase 1 (DNA damage-regulated overexpressed in cancer 45) (DOC45) (GTP-binding protein 9)	OLA1 GTPBP9 PRO2455 PTD004	0	395	0	0.45649	0.202461	-0.148926	NA	NA	NA	19.4739	19.7221	19.898	19.6796	19.6836	19.284	NA	NA	NA	NA	NA	NA
Q9NTX5	Homo sapiens (Human)	Ethylmalonyl-CoA decarboxylase (EC 4.1.1.94) (Enoyl-CoA hydratase domain-containing protein 1) (Methylmalonyl-CoA decarboxylase) (MMCD)	ECHDC1	0	13	0	0.684998	0.0952834	-0.0933689	NA	NA	NA	21.0977	21.1698	21.2256	20.6496	21.2806	21.2827	NA	NA	NA	NA	NA	NA
Q9NTX5	Homo sapiens (Human)	Ethylmalonyl-CoA decarboxylase (EC 4.1.1.94) (Enoyl-CoA hydratase domain-containing protein 1) (Methylmalonyl-CoA decarboxylase) (MMCD)	ECHDC1	0	9	1	NA	NA	NA	0.0342547	0.677603	1.45808	NA	NA	NA	NA	NA	NA	22.3082	20.7098	21.509	22.9377	22.9965	22.9671
Q9NUQ3	Homo sapiens (Human)	Gamma-taxilin (Environmental lipopolysaccharide-responding gene protein) (Factor inhibiting ATF4-mediated transcription) (FIAT) (Lipopolysaccharide-specific response protein 5)	TXLNG CXorf15 ELRG LSR5	0	133	0	NA	NA	NA	0.206353	0.265586	1.86111	NA	NA	NA	NA	NA	NA	28.2766	25.1901	29.2988	29.4834	29.4607	29.4048
Q9UJU6	Homo sapiens (Human)	Drebrin-like protein (Cervical SH3P7) (Cervical mucin-associated protein) (Drebrin-F) (HPK1-interacting protein of 55 kDa) (HIP-55) (SH3 domain-containing protein 7)	DBNL CMAP SH3P7 PP5423	0	176	0	0.40207	0.232126	0.133268	0.126715	0.351368	-0.311185	21.1512	20.803	20.9771	21.2271	21.1942	20.9098	20.7458	21.0586	21.2721	20.6432	20.818	20.6817
Q9ULB4	Homo sapiens (Human)	Cadherin-9	CDH9	0	42	0	0.842415	0.0438433	-0.0230789	0.105938	0.393195	-0.305574	21.6482	21.8073	21.8026	21.5653	21.896	21.7277	23.6232	23.1179	23.3705	23.0945	23.0354	23.0649
Q9ULH1	Homo sapiens (Human)	Arf-GAP with SH3 domain, ANK repeat and PH domain-containing protein 1 (130 kDa phosphatidylinositol 4,5-bisphosphate-dependent ARF1 GTPase-activating protein) (ADP-ribosylation factor-directed GTPase-activating protein 1) (ARF GTPase-activating protein 1) (Development and differentiation-enhancing factor 1) (DEF-1) (Differentiation-enhancing factor 1) (PIP2-dependent ARF1 GAP)	ASAP1 DDEF1 KIAA1249 PAG2	0	1020	0	NA	NA	NA	NA	NA	NA	NA	NA	NA	NA	NA	NA	NA	NA	NA	NA	NA	NA
Q9ULH1	Homo sapiens (Human)	Arf-GAP with SH3 domain, ANK repeat and PH domain-containing protein 1 (130 kDa phosphatidylinositol 4,5-bisphosphate-dependent ARF1 GTPase-activating protein) (ADP-ribosylation factor-directed GTPase-activating protein 1) (ARF GTPase-activating protein 1) (Development and differentiation-enhancing factor 1) (DEF-1) (Differentiation-enhancing factor 1) (PIP2-dependent ARF1 GAP)	ASAP1 DDEF1 KIAA1249 PAG2	0	852	0	NA	NA	NA	NA	NA	NA	NA	NA	NA	NA	NA	NA	NA	NA	NA	NA	NA	NA
Q9ULH1	Homo sapiens (Human)	Arf-GAP with SH3 domain, ANK repeat and PH domain-containing protein 1 (130 kDa phosphatidylinositol 4,5-bisphosphate-dependent ARF1 GTPase-activating protein) (ADP-ribosylation factor-directed GTPase-activating protein 1) (ARF GTPase-activating protein 1) (Development and differentiation-enhancing factor 1) (DEF-1) (Differentiation-enhancing factor 1) (PIP2-dependent ARF1 GAP)	ASAP1 DDEF1 KIAA1249 PAG2	0	913	0	0.158336	0.463689	-1.46082	NA	NA	NA	22.1961	23.062	21.3302	21.3217	21.5035	19.3806	NA	NA	NA	NA	NA	NA
Q9ULH1	Homo sapiens (Human)	Arf-GAP with SH3 domain, ANK repeat and PH domain-containing protein 1 (130 kDa phosphatidylinositol 4,5-bisphosphate-dependent ARF1 GTPase-activating protein) (ADP-ribosylation factor-directed GTPase-activating protein 1) (ARF GTPase-activating protein 1) (Development and differentiation-enhancing factor 1) (DEF-1) (Differentiation-enhancing factor 1) (PIP2-dependent ARF1 GAP)	ASAP1 DDEF1 KIAA1249 PAG2	0	905	0	0.158336	0.463689	-1.46082	NA	NA	NA	22.1961	23.062	21.3302	21.3217	21.5035	19.3806	NA	NA	NA	NA	NA	NA
Q9Y230	Homo sapiens (Human)	RuvB-like 2 (EC 3.6.4.12) (48 kDa TATA box-binding protein-interacting protein) (48 kDa TBP-interacting protein) (51 kDa erythrocyte cytosolic protein) (ECP-51) (INO80 complex subunit J) (Repressing pontin 52) (Reptin 52) (TIP49b) (TIP60-associated protein 54-beta) (TAP54-beta)	RUVBL2 INO80J TIP48 TIP49B CGI-46	0	9	0	NA	NA	NA	NA	NA	NA	NA	NA	NA	NA	NA	NA	NA	NA	NA	NA	NA	NA
Q9Y2J2	Homo sapiens (Human)	Band 4.1-like protein 3 (4.1B) (Differentially expressed in adenocarcinoma of the lung protein 1) (DAL-1) (Erythrocyte membrane protein band 4.1-like 3) [Cleaved into: Band 4.1-like protein 3, N-terminally processed]	EPB41L3 DAL1 KIAA0987	0	1027	0	0.00047142	2.06426	0.840187	0.817281	0.0368368	-0.0404181	24.0456	24.1186	24.3139	25.2551	25.2497	24.4939	24.7984	25.253	25.2544	24.956	25.1697	25.0589
Q9Y2J2	Homo sapiens (Human)	Band 4.1-like protein 3 (4.1B) (Differentially expressed in adenocarcinoma of the lung protein 1) (DAL-1) (Erythrocyte membrane protein band 4.1-like 3) [Cleaved into: Band 4.1-like protein 3, N-terminally processed]	EPB41L3 DAL1 KIAA0987	0	1037	0	0.00357575	1.48765	2.69562	0.357394	0.165221	-1.00592	25.1313	22.5456	23.0129	26.6014	26.4612	25.7141	23.4167	25.011	24.7109	24.1038	21.7073	24.3097
Q9Y570	Homo sapiens (Human)	Protein phosphatase methylesterase 1 (PME-1) (EC 3.1.1.89)	PPME1 PME1 PP2593 PRO0750	0	6	0	0.0985104	0.577947	-0.159941	0.294872	0.196736	-0.367091	21.6818	22.0141	22.2318	21.5719	21.9254	21.9505	22.1678	21.6734	22.2866	21.5854	22.1291	21.3121
Q9Y5K6	Homo sapiens (Human)	CD2-associated protein (Adapter protein CMS) (Cas ligand with multiple SH3 domains)	CD2AP	0	457	0	NA	NA	NA	NA	NA	NA	NA	NA	NA	NA	NA	NA	NA	NA	NA	NA	NA	NA
Q9Y5K6	Homo sapiens (Human)	CD2-associated protein (Adapter protein CMS) (Cas ligand with multiple SH3 domains)	CD2AP	0	243	0	NA	NA	NA	NA	NA	NA	NA	NA	NA	NA	NA	NA	NA	NA	NA	NA	NA	NA
