# Supplementary material for: PerTurboID, a targeted in situ method reveals the impact of kinase deletion on its local protein environment in the cytoadhesion complex of malaria-causing parasites
Source: eLife. 2023 Sep 22;12:e86367. doi: 10.7554/eLife.86367 (PMC10564455; doi:10.7554/eLife.86367)
Supplement: Supplementary file 5. [file elife-86367-supp5.xlsx]

## Sheet: Perturbo_Peptides
Supplementary Table 5: KAHRP and PTP4 PerTurboID processed peptide-level data. See supplementary table 4 for site-level data. Intensities have been normalized and imputed. Only biotinylated peptides are included.
Proteins	Organism	Protein names	Gene Names.y	Modifications	Phosphorylated?	Biotin (K)	Missed cleavages	Sequence	Modified sequence	Biotinylation Position	Phosphate Position	Pvalue_KAHRP	Qvalue_KAHRP	L2FC_KAHRP	Pvalue_PTP4	Qvalue_PTP4	L2FC_PTP4	Intensity KAHRP_DMSO1_processed	Intensity KAHRP_DMSO2_processed	Intensity KAHRP_DMSO3_processed	Intensity KAHRP_RAP1_processed	Intensity KAHRP_RAP2_processed	Intensity KAHRP_RAP3_processed	Intensity PTP4_DMSO1_processed	Intensity PTP4_DMSO2_processed	Intensity PTP4_DMSO3_processed	Intensity PTP4_RAP1_processed	Intensity PTP4_RAP2_processed	Intensity PTP4_RAP3_processed
E9PAV3	Homo sapiens (Human)	Nascent polypeptide-associated complex subunit alpha, muscle-specific form (Alpha-NAC, muscle-specific form) (skNAC)	NACA	Biotin (K)	0	1	2	SKNILFVITKPDVYK	_SK(bi)NILFVITKPDVYK_;_SK(bi)NILFVITKPDVYK_;_SK(bi)NILFVITKPDVYK_;_SK(bi)NILFVITKPDVYK_	1963	NA	NA	NA	NA	NA	NA	NA	NA	NA	NA	NA	NA	NA	NA	NA	NA	NA	NA	NA
O00178	Homo sapiens (Human)	GTP-binding protein 1 (G-protein 1) (GP-1) (GP1)	GTPBP1	Biotin (K)	0	1	1	VITFIDLAGHEKYLK	_VITFIDLAGHEK(bi)YLK_;_VITFIDLAGHEK(bi)YLK_;_VITFIDLAGHEK(bi)YLK_;_VITFIDLAGHEK(bi)YLK_;_VITFIDLAGHEK(bi)YLK_	258	NA	NA	NA	NA	NA	NA	NA	NA	NA	NA	NA	NA	NA	NA	NA	NA	NA	NA	NA
O14717	Homo sapiens (Human)	tRNA (cytosine(38)-C(5))-methyltransferase (EC 2.1.1.204) (DNA (cytosine-5)-methyltransferase-like protein 2) (Dnmt2) (DNA methyltransferase homolog HsaIIP) (DNA MTase homolog HsaIIP) (M.HsaIIP) (PuMet)	TRDMT1 DNMT2	Biotin (K)	0	1	1	LQKLPK	_LQK(bi)LPK_;_LQK(bi)LPK_;_LQK(bi)LPK_;_LQK(bi)LPK_;_LQK(bi)LPK_;_LQK(bi)LPK_;_LQK(bi)LPK_;_LQK(bi)LPK_;_LQK(bi)LPK_;_LQK(bi)LPK_;_LQK(bi)LPK_;_LQK(bi)LPK_;_LQK(bi)LPK_;_LQK(bi)LPK_;_LQK(bi)LPK_;_LQK(bi)LPK_;_LQK(bi)LPK_	111	NA	0.0373649	0.687546	0.204901	0.94611	0.0109965	0.0182119	26.3644	26.166	26.2401	26.4501	26.5244	26.4107	23.1221	23.8879	23.8394	23.5452	23.7286	23.6303
O43491	Homo sapiens (Human)	Band 4.1-like protein 2 (Erythrocyte membrane protein band 4.1-like 2) (Generally expressed protein 4.1) (4.1G)	EPB41L2	Biotin (K)	0	1	2	GGISETRIEKR	_GGISETRIEK(bi)R_;_GGISETRIEK(bi)R_;_GGISETRIEK(bi)R_;_GGISETRIEK(bi)R_;_GGISETRIEK(bi)R_;_GGISETRIEK(bi)R_;_GGISETRIEK(bi)R_;_GGISETRIEK(bi)R_;_GGISETRIEK(bi)R_;_GGISETRIEK(bi)R_;_GGISETRIEK(bi)R_;_GGISETRIEK(bi)R_;_GGISETRIEK(bi)R_	956	NA	0.0847429	0.523817	5.74917	0.357394	0.133818	-1.00592	27.3325	19.5761	20.0517	28.4786	28.0693	27.6599	23.4167	25.011	24.7109	24.1038	21.7073	24.3097
O43491	Homo sapiens (Human)	Band 4.1-like protein 2 (Erythrocyte membrane protein band 4.1-like 2) (Generally expressed protein 4.1) (4.1G)	EPB41L2	Biotin (K)	0	1	1	TVKGGISETR	_TVK(bi)GGISETR_;_TVK(bi)GGISETR_;_TVK(bi)GGISETR_;_TVK(bi)GGISETR_;_TVK(bi)GGISETR_;_TVK(bi)GGISETR_;_TVK(bi)GGISETR_;_TVK(bi)GGISETR_;_TVK(bi)GGISETR_;_TVK(bi)GGISETR_;_TVK(bi)GGISETR_;_TVK(bi)GGISETR_;_TVK(bi)GGISETR_;_TVK(bi)GGISETR_;_TVK(bi)GGISETR_;_TVK(bi)GGISETR_;_TVK(bi)GGISETR_;_TVK(bi)GGISETR_;_TVK(bi)GGISETR_;_TVK(bi)GGISETR_;_TVK(bi)GGISETR_;_TVK(bi)GGISETR_;_TVK(bi)GGISETR_;_TVK(bi)…	946	NA	0.0111104	0.946719	0.269078	0.817281	0.02644	-0.0404181	25.8931	26.0263	25.9585	26.2656	26.2833	26.1362	24.7984	25.253	25.2544	24.956	25.1697	25.0589
O43491	Homo sapiens (Human)	Band 4.1-like protein 2 (Erythrocyte membrane protein band 4.1-like 2) (Generally expressed protein 4.1) (4.1G)	EPB41L2	Biotin (K)	0	1	2	TVKGGISETRIEK	_TVK(bi)GGISETRIEK_;_TVK(bi)GGISETRIEK_;_TVK(bi)GGISETRIEK_;_TVK(bi)GGISETRIEK_;_TVK(bi)GGISETRIEK_;_TVK(bi)GGISETRIEK_;_TVK(bi)GGISETRIEK_;_TVK(bi)GGISETRIEK_;_TVK(bi)GGISETRIEK_	946	NA	0.101422	0.49571	0.753994	NA	NA	NA	22.2279	22.3877	22.3101	23.4291	23.4013	22.3572	NA	NA	NA	NA	NA	NA
O43491	Homo sapiens (Human)	Band 4.1-like protein 2 (Erythrocyte membrane protein band 4.1-like 2) (Generally expressed protein 4.1) (4.1G)	EPB41L2	Biotin (K)	0	1	3	TVKGGISETRIEKR	_TVKGGISETRIEK(bi)R_;_TVKGGISETRIEK(bi)R_;_TVKGGISETRIEK(bi)R_;_TVKGGISETRIEK(bi)R_;_TVKGGISETRIEK(bi)R_;_TVKGGISETRIEK(bi)R_;_TVKGGISETRIEK(bi)R_;_TVKGGISETRIEK(bi)R_;_TVKGGISETRIEK(bi)R_;_TVKGGISETRIEK(bi)R_;_TVKGGISETRIEK(bi)R_;_TVKGGISETRIEK(bi)R_;_TVK(bi)GGISETRIEK(bi)R_;_TVK(bi)GGISETRIEK(bi)R_;_TVK(bi)GGISETRIEK(bi)R_;_TVK(bi)GGISETRIEK(bi)R_;_TVK(bi)GGISETRIEK(bi)R_;_TVK(bi)GGISETRIEK(bi)…	956;946	NA	0.0317504	0.721959	1.28826	NA	NA	NA	25.3816	25.4053	26.0137	27.1916	27.2638	26.2099	NA	NA	NA	NA	NA	NA
O43491	Homo sapiens (Human)	Band 4.1-like protein 2 (Erythrocyte membrane protein band 4.1-like 2) (Generally expressed protein 4.1) (4.1G)	EPB41L2	2 Biotin (K)	0	2	3	TVKGGISETRIEKR	_TVKGGISETRIEK(bi)R_;_TVKGGISETRIEK(bi)R_;_TVKGGISETRIEK(bi)R_;_TVKGGISETRIEK(bi)R_;_TVKGGISETRIEK(bi)R_;_TVKGGISETRIEK(bi)R_;_TVKGGISETRIEK(bi)R_;_TVKGGISETRIEK(bi)R_;_TVKGGISETRIEK(bi)R_;_TVKGGISETRIEK(bi)R_;_TVKGGISETRIEK(bi)R_;_TVKGGISETRIEK(bi)R_;_TVK(bi)GGISETRIEK(bi)R_;_TVK(bi)GGISETRIEK(bi)R_;_TVK(bi)GGISETRIEK(bi)R_;_TVK(bi)GGISETRIEK(bi)R_;_TVK(bi)GGISETRIEK(bi)R_;_TVK(bi)GGISETRIEK(bi)…	956;946	NA	0.0230688	0.774253	1.04942	NA	NA	NA	22.6798	22.6552	22.9734	24.1339	24.0504	23.2724	NA	NA	NA	NA	NA	NA
O43768	Homo sapiens (Human)	Alpha-endosulfine (ARPP-19e)	ENSA	Biotin (K)	0	1	2	AKYPSLGQKPGGSDFLMK	_AK(bi)YPSLGQKPGGSDFLMK_;_AK(bi)YPSLGQKPGGSDFLMK_;_AK(bi)YPSLGQKPGGSDFLMK_;_AK(bi)YPSLGQKPGGSDFLMK_;_AK(bi)YPSLGQKPGGSDFLMK_	40	NA	0.479379	0.140867	0.181229	NA	NA	NA	21.7774	21.6485	21.5195	21.8297	22.2113	21.4481	NA	NA	NA	NA	NA	NA
O43768	Homo sapiens (Human)	Alpha-endosulfine (ARPP-19e)	ENSA	Biotin (K)	0	1	2	QLPSAGPDKNLVTGDHIPTPQDLPQRK	_QLPSAGPDK(bi)NLVTGDHIPTPQDLPQRK_	89	NA	NA	NA	NA	NA	NA	NA	NA	NA	NA	NA	NA	NA	NA	NA	NA	NA	NA	NA
O43768	Homo sapiens (Human)	Alpha-endosulfine (ARPP-19e)	ENSA	Biotin (K)	0	1	1	SSLVTSKLAGGQVE	_SSLVTSK(bi)LAGGQVE_;_SSLVTSK(bi)LAGGQVE_	114	NA	NA	NA	NA	NA	NA	NA	NA	NA	NA	NA	NA	NA	NA	NA	NA	NA	NA	NA
O60242	Homo sapiens (Human)	Adhesion G protein-coupled receptor B3 (Brain-specific angiogenesis inhibitor 3)	ADGRB3 BAI3 KIAA0550	Biotin (K);Phospho (STY)	1	1	0	ELDESSVFVLGAVLYK	_ELDESSVFVLGAVLY(ph)K(bi)_	768	767	NA	NA	NA	NA	NA	NA	NA	NA	NA	NA	NA	NA	NA	NA	NA	NA	NA	NA
O60488	Homo sapiens (Human)	Long-chain-fatty-acid--CoA ligase 4 (EC 6.2.1.3) (Arachidonate--CoA ligase) (EC 6.2.1.15) (Long-chain acyl-CoA synthetase 4) (LACS 4)	ACSL4 ACS4 FACL4 LACS4	Biotin (K)	0	1	3	EIREAANAMKLERFEIPIK	_EIREAANAMKLERFEIPIK(bi)_;_EIREAANAMKLERFEIPIK(bi)_;_EIREAANAMKLERFEIPIK(bi)_;_EIREAANAMKLERFEIPIK(bi)_;_EIREAANAMKLERFEIPIK(bi)_;_EIREAANAMKLERFEIPIK(bi)_;_EIREAANAMKLERFEIPIK(bi)_	670	NA	0.1444	0.40959	-2.48667	NA	NA	NA	23.1814	25.5593	20.8036	20.6948	20.7473	20.6422	NA	NA	NA	NA	NA	NA
O75387	Homo sapiens (Human)	Large neutral amino acids transporter small subunit 3 (L-type amino acid transporter 3) (Prostate cancer overexpressed gene 1 protein) (Solute carrier family 43 member 1)	SLC43A1 LAT3 PB39 POV1	Biotin (K)	0	1	1	LSGLALDHKVTGDLFYTHVTTMGQR	_LSGLALDHK(bi)VTGDLFYTHVTTMGQR_;_LSGLALDHK(bi)VTGDLFYTHVTTMGQR_	244	NA	NA	NA	NA	NA	NA	NA	NA	NA	NA	NA	NA	NA	NA	NA	NA	NA	NA	NA
P00568	Homo sapiens (Human)	Adenylate kinase isoenzyme 1 (AK 1) (EC 2.7.4.3) (EC 2.7.4.6) (ATP-AMP transphosphorylase 1) (ATP:AMP phosphotransferase) (Adenylate monophosphate kinase) (Myokinase)	AK1	Biotin (K)	0	1	1	DAMVAKVNTSK	_DAMVAK(bi)VNTSK_;_DAMVAK(bi)VNTSK_;_DAMVAK(bi)VNTSK_;_DAMVAK(bi)VNTSK_;_DAMVAK(bi)VNTSK_;_DAMVAK(bi)VNTSK_;_DAMVAK(bi)VNTSK_	83	NA	NA	NA	NA	NA	NA	NA	NA	NA	NA	NA	NA	NA	NA	NA	NA	NA	NA	NA
P00568	Homo sapiens (Human)	Adenylate kinase isoenzyme 1 (AK 1) (EC 2.7.4.3) (EC 2.7.4.6) (ATP-AMP transphosphorylase 1) (ATP:AMP phosphotransferase) (Adenylate monophosphate kinase) (Myokinase)	AK1	Biotin (K)	0	1	1	IVQKYGYTHLSTGDLLR	_IVQK(bi)YGYTHLSTGDLLR_;_IVQK(bi)YGYTHLSTGDLLR_;_IVQK(bi)YGYTHLSTGDLLR_	31	NA	NA	NA	NA	NA	NA	NA	NA	NA	NA	NA	NA	NA	NA	NA	NA	NA	NA	NA
P00915	Homo sapiens (Human)	Carbonic anhydrase 1 (EC 4.2.1.1) (Carbonate dehydratase I) (Carbonic anhydrase B) (CAB) (Carbonic anhydrase I) (CA-I)	CA1	Biotin (K)	0	1	1	HDTSLKPISVSYNPATAK	_HDTSLK(bi)PISVSYNPATAK_	46	NA	NA	NA	NA	NA	NA	NA	NA	NA	NA	NA	NA	NA	NA	NA	NA	NA	NA	NA
P00915	Homo sapiens (Human)	Carbonic anhydrase 1 (EC 4.2.1.1) (Carbonate dehydratase I) (Carbonic anhydrase B) (CAB) (Carbonic anhydrase I) (CA-I)	CA1	Biotin (K)	0	1	2	SLLSNVEGDNAVPMQHNNRPTQPLKGR	_SLLSNVEGDNAVPM(ox)QHNNRPTQPLK(bi)GR_;_SLLSNVEGDNAVPM(ox)QHNNRPTQPLK(bi)GR_;_SLLSNVEGDNAVPM(ox)QHNNRPTQPLK(bi)GR_;_SLLSNVEGDNAVPM(ox)QHNNRPTQPLK(bi)GR_;_SLLSNVEGDNAVPM(ox)QHNNRPTQPLK(bi)GR_;_SLLSNVEGDNAVPM(ox)QHNNRPTQPLK(bi)GR_;_SLLSNVEGDNAVPMQHNNRPTQPLK(bi)GR_;_SLLSNVEGDNAVPMQHNNRPTQPLK(bi)GR_;_SLLSNVEGDNAVPMQHNNRPTQPLK(bi)GR_;_SLLSNVEGDNAVPMQHNNRPTQPLK(bi)GR_;_SLLSNVEGDNAVPMQHNNRPTQPLK(bi)GR_;_…	253	NA	0.171467	0.364137	-0.547606	NA	NA	NA	24.5491	24.0328	24.2988	24.307	23.6143	23.3165	NA	NA	NA	NA	NA	NA
P00915	Homo sapiens (Human)	Carbonic anhydrase 1 (EC 4.2.1.1) (Carbonate dehydratase I) (Carbonic anhydrase B) (CAB) (Carbonic anhydrase I) (CA-I)	CA1	Biotin (K);Oxidation (M)	0	1	2	SLLSNVEGDNAVPMQHNNRPTQPLKGR	_SLLSNVEGDNAVPM(ox)QHNNRPTQPLK(bi)GR_;_SLLSNVEGDNAVPM(ox)QHNNRPTQPLK(bi)GR_;_SLLSNVEGDNAVPM(ox)QHNNRPTQPLK(bi)GR_;_SLLSNVEGDNAVPM(ox)QHNNRPTQPLK(bi)GR_;_SLLSNVEGDNAVPM(ox)QHNNRPTQPLK(bi)GR_;_SLLSNVEGDNAVPM(ox)QHNNRPTQPLK(bi)GR_;_SLLSNVEGDNAVPMQHNNRPTQPLK(bi)GR_;_SLLSNVEGDNAVPMQHNNRPTQPLK(bi)GR_;_SLLSNVEGDNAVPMQHNNRPTQPLK(bi)GR_;_SLLSNVEGDNAVPMQHNNRPTQPLK(bi)GR_;_SLLSNVEGDNAVPMQHNNRPTQPLK(bi)GR_;_…	253	NA	0.354433	0.197054	-0.283219	NA	NA	NA	21.9354	22.2008	22.7235	22.0359	22.2284	21.7459	NA	NA	NA	NA	NA	NA
P00915	Homo sapiens (Human)	Carbonic anhydrase 1 (EC 4.2.1.1) (Carbonate dehydratase I) (Carbonic anhydrase B) (CAB) (Carbonic anhydrase I) (CA-I)	CA1	Biotin (K)	0	1	2	TSETKHDTSLKPISVSYNPATAK	_TSETKHDTSLK(bi)PISVSYNPATAK_;_TSETKHDTSLK(bi)PISVSYNPATAK_;_TSETKHDTSLK(bi)PISVSYNPATAK_;_TSETKHDTSLK(bi)PISVSYNPATAK_;_TSETKHDTSLK(bi)PISVSYNPATAK_;_TSETKHDTSLK(bi)PISVSYNPATAK_;_TSETKHDTSLK(bi)PISVSYNPATAK_;_TSETKHDTSLK(bi)PISVSYNPATAK_;_TSETKHDTSLK(bi)PISVSYNPATAK_	46	NA	0.341804	0.207274	0.366484	NA	NA	NA	22.9897	21.9877	22.8143	23.1049	22.6796	23.1067	NA	NA	NA	NA	NA	NA
P00915	Homo sapiens (Human)	Carbonic anhydrase 1 (EC 4.2.1.1) (Carbonate dehydratase I) (Carbonic anhydrase B) (CAB) (Carbonic anhydrase I) (CA-I)	CA1	Biotin (K);Oxidation (M)	0	1	1	YSSLAEAASKADGLAVIGVLMK	_YSSLAEAASK(bi)ADGLAVIGVLM(ox)K_;_YSSLAEAASK(bi)ADGLAVIGVLM(ox)K_;_YSSLAEAASK(bi)ADGLAVIGVLM(ox)K_;_YSSLAEAASK(bi)ADGLAVIGVLM(ox)K_;_YSSLAEAASK(bi)ADGLAVIGVLM(ox)K_;_YSSLAEAASK(bi)ADGLAVIGVLM(ox)K_;_YSSLAEAASK(bi)ADGLAVIGVLM(ox)K_;_YSSLAEAASK(bi)ADGLAVIGVLM(ox)K_;_YSSLAEAASK(bi)ADGLAVIGVLM(ox)K_;_YSSLAEAASK(bi)ADGLAVIGVLM(ox)K_;_YSSLAEAASK(bi)ADGLAVIGVLM(ox)K_;_YSSLAEAASK(bi)ADGLAVIGVLMK_;_YSSLAE…	138	NA	0.781864	0.0447459	-0.0940756	0.493944	0.0915494	-0.219471	24.4983	25.1482	24.1676	24.4103	24.3456	24.7759	24.6232	23.8574	24.5505	23.8468	24.1242	24.4016
P00915	Homo sapiens (Human)	Carbonic anhydrase 1 (EC 4.2.1.1) (Carbonate dehydratase I) (Carbonic anhydrase B) (CAB) (Carbonic anhydrase I) (CA-I)	CA1	Biotin (K)	0	1	1	YSSLAEAASKADGLAVIGVLMK	_YSSLAEAASK(bi)ADGLAVIGVLM(ox)K_;_YSSLAEAASK(bi)ADGLAVIGVLM(ox)K_;_YSSLAEAASK(bi)ADGLAVIGVLM(ox)K_;_YSSLAEAASK(bi)ADGLAVIGVLM(ox)K_;_YSSLAEAASK(bi)ADGLAVIGVLM(ox)K_;_YSSLAEAASK(bi)ADGLAVIGVLM(ox)K_;_YSSLAEAASK(bi)ADGLAVIGVLM(ox)K_;_YSSLAEAASK(bi)ADGLAVIGVLM(ox)K_;_YSSLAEAASK(bi)ADGLAVIGVLM(ox)K_;_YSSLAEAASK(bi)ADGLAVIGVLM(ox)K_;_YSSLAEAASK(bi)ADGLAVIGVLM(ox)K_;_YSSLAEAASK(bi)ADGLAVIGVLMK_;_YSSLAE…	138	NA	0.50557	0.132448	0.283906	0.569201	0.0743459	-0.233348	25.4023	25.9419	24.8627	26.0125	25.2365	25.8096	25.8862	24.7535	25.3324	25.2551	24.7174	25.2995
P00918	Homo sapiens (Human)	Carbonic anhydrase 2 (EC 4.2.1.1) (Carbonate dehydratase II) (Carbonic anhydrase C) (CAC) (Carbonic anhydrase II) (CA-II)	CA2	Biotin (K)	0	1	1	GKSADFTNFDPR	_GK(bi)SADFTNFDPR_;_GK(bi)SADFTNFDPR_;_GK(bi)SADFTNFDPR_;_GK(bi)SADFTNFDPR_;_GK(bi)SADFTNFDPR_;_GK(bi)SADFTNFDPR_;_GK(bi)SADFTNFDPR_;_GK(bi)SADFTNFDPR_;_GK(bi)SADFTNFDPR_;_GK(bi)SADFTNFDPR_;_GK(bi)SADFTNFDPR_;_GK(bi)SADFTNFDPR_	171	NA	0.302232	0.237237	-0.404649	0.761848	0.0401971	0.103815	23.7841	22.7085	22.8662	22.6927	22.6117	22.8405	20.7136	21.6208	21.337	21.0488	21.6499	21.2841
P00918	Homo sapiens (Human)	Carbonic anhydrase 2 (EC 4.2.1.1) (Carbonate dehydratase II) (Carbonic anhydrase C) (CAC) (Carbonic anhydrase II) (CA-II)	CA2	Biotin (K)	0	1	2	QSPVDIDTHTAKYDPSLKPLSVSYDQATSLR	_QSPVDIDTHTAKYDPSLK(bi)PLSVSYDQATSLR_;_QSPVDIDTHTAKYDPSLK(bi)PLSVSYDQATSLR_;_QSPVDIDTHTAKYDPSLK(bi)PLSVSYDQATSLR_;_QSPVDIDTHTAKYDPSLK(bi)PLSVSYDQATSLR_;_QSPVDIDTHTAKYDPSLK(bi)PLSVSYDQATSLR_	45	NA	0.781047	0.0447459	-0.0690803	NA	NA	NA	22.3781	22.763	22.5706	22.8903	22.4147	22.1994	NA	NA	NA	NA	NA	NA
P00918	Homo sapiens (Human)	Carbonic anhydrase 2 (EC 4.2.1.1) (Carbonate dehydratase II) (Carbonic anhydrase C) (CAC) (Carbonic anhydrase II) (CA-II)	CA2	Biotin (K)	0	1	2	VGSAKPGLQKVVDVLDSIK	_VGSAKPGLQK(bi)VVDVLDSIK_;_VGSAKPGLQK(bi)VVDVLDSIK_;_VGSAKPGLQK(bi)VVDVLDSIK_;_VGSAKPGLQK(bi)VVDVLDSIK_;_VGSAKPGLQK(bi)VVDVLDSIK_;_VGSAKPGLQK(bi)VVDVLDSIK_;_VGSAKPGLQK(bi)VVDVLDSIK_;_VGSAKPGLQK(bi)VVDVLDSIK_;_VGSAKPGLQK(bi)VVDVLDSIK_;_VGSAKPGLQK(bi)VVDVLDSIK_;_VGSAKPGLQK(bi)VVDVLDSIK_	158	NA	0.0921753	0.506879	-0.552269	0.830521	0.0243508	0.102746	23.8396	23.8303	23.4753	22.7811	23.1643	23.543	22.2484	22.2344	22.3499	21.6038	22.3803	23.1569
P00918	Homo sapiens (Human)	Carbonic anhydrase 2 (EC 4.2.1.1) (Carbonate dehydratase II) (Carbonic anhydrase C) (CAC) (Carbonic anhydrase II) (CA-II)	CA2	Biotin (K)	0	1	3	VGSAKPGLQKVVDVLDSIKTK	_VGSAKPGLQK(bi)VVDVLDSIKTK_;_VGSAKPGLQK(bi)VVDVLDSIKTK_;_VGSAKPGLQK(bi)VVDVLDSIKTK_	158	NA	0.0618516	0.586202	1.69899	NA	NA	NA	19.5165	17.9765	19.3533	21.5304	20.111	20.3018	NA	NA	NA	NA	NA	NA
P02042	Homo sapiens (Human)	Hemoglobin subunit delta (Delta-globin) (Hemoglobin delta chain)	HBD	Biotin (K)	0	1	1	VVAGVANALAHKYH	_VVAGVANALAHK(bi)YH_;_VVAGVANALAHK(bi)YH_;_VVAGVANALAHK(bi)YH_;_VVAGVANALAHK(bi)YH_;_VVAGVANALAHK(bi)YH_;_VVAGVANALAHK(bi)YH_;_VVAGVANALAHK(bi)YH_;_VVAGVANALAHK(bi)YH_;_VVAGVANALAHK(bi)YH_;_VVAGVANALAHK(bi)YH_;_VVAGVANALAHK(bi)YH_;_VVAGVANALAHK(bi)YH_;_VVAGVANALAHK(bi)YH_;_VVAGVANALAHK(bi)YH_;_VVAGVANALAHK(bi)YH_;_VVAGVANALAHK(bi)YH_;_VVAGVANALAHK(bi)YH_;_VVAGVANALAHK(bi)YH_;_VVAGVANALAHK(bi)YH_;…	145	NA	0.654831	0.0784913	0.0715378	0.0514609	0.461332	-0.354038	26.3675	26.1202	25.9749	26.3912	26.2211	26.065	24.8812	25.1466	24.9524	24.8286	24.481	24.6085
P02549	Homo sapiens (Human)	Spectrin alpha chain, erythrocytic 1 (Erythroid alpha-spectrin)	SPTA1 SPTA	Biotin (K)	0	1	2	EISSKIEALNEKTPSLAK	_EISSKIEALNEK(bi)TPSLAK_;_EISSKIEALNEK(bi)TPSLAK_;_EISSKIEALNEK(bi)TPSLAK_;_EISSKIEALNEK(bi)TPSLAK_;_EISSKIEALNEK(bi)TPSLAK_;_EISSKIEALNEK(bi)TPSLAK_	1909	NA	NA	NA	NA	0.449211	0.104336	-0.411669	NA	NA	NA	NA	NA	NA	21.6646	21.5066	22.4045	22.15	21.4469	20.7438
P02549	Homo sapiens (Human)	Spectrin alpha chain, erythrocytic 1 (Erythroid alpha-spectrin)	SPTA1 SPTA	Biotin (K)	0	1	1	IEALNEKTPSLAK	_IEALNEK(bi)TPSLAK_;_IEALNEK(bi)TPSLAK_;_IEALNEK(bi)TPSLAK_;_IEALNEK(bi)TPSLAK_;_IEALNEK(bi)TPSLAK_;_IEALNEK(bi)TPSLAK_;_IEALNEK(bi)TPSLAK_;_IEALNEK(bi)TPSLAK_;_IEALNEK(bi)TPSLAK_;_IEALNEK(bi)TPSLAK_;_IEALNEK(bi)TPSLAK_;_IEALNEK(bi)TPSLAK_;_IEALNEK(bi)TPSLAK_;_IEALNEK(bi)TPSLAK_;_IEALNEK(bi)TPSLAK_;_IEALNEK(bi)TPSLAK_;_IEALNEK(bi)TPSLAK_;_IEALNEK(bi)TPSLAK_;_IEALNEK(bi)TPSLAK_;_IEALNEK(bi)TPSLAK_…	1909	NA	0.10023	0.497342	-0.956936	0.665831	0.0548982	-0.178915	24.7215	23.8693	24.4571	24.1223	22.9022	23.1524	26.3922	25.7679	25.9769	26.5283	25.6546	25.4174
P02549	Homo sapiens (Human)	Spectrin alpha chain, erythrocytic 1 (Erythroid alpha-spectrin)	SPTA1 SPTA	Biotin (K)	0	1	3	KLADDEDYKDIQNLKSR	_KLADDEDYKDIQNLK(bi)SR_;_KLADDEDYKDIQNLK(bi)SR_;_KLADDEDYKDIQNLK(bi)SR_;_KLADDEDYKDIQNLK(bi)SR_;_KLADDEDYKDIQNLK(bi)SR_;_KLADDEDYKDIQNLK(bi)SR_;_KLADDEDYKDIQNLK(bi)SR_;_KLADDEDYKDIQNLK(bi)SR_	617	NA	0.458532	0.150006	0.393941	NA	NA	NA	22.3658	21.3253	21.1691	22.5666	21.9403	21.535	NA	NA	NA	NA	NA	NA
P02549	Homo sapiens (Human)	Spectrin alpha chain, erythrocytic 1 (Erythroid alpha-spectrin)	SPTA1 SPTA	Acetyl (Protein N-term);Biotin (K);Oxidation (M)	0	1	1	MEQFPKETVVESSGPK	_(ac)M(ox)EQFPK(bi)ETVVESSGPK_;_(ac)M(ox)EQFPK(bi)ETVVESSGPK_;_(ac)M(ox)EQFPK(bi)ETVVESSGPK_;_(ac)M(ox)EQFPK(bi)ETVVESSGPK_;_(ac)M(ox)EQFPK(bi)ETVVESSGPK_;_(ac)M(ox)EQFPK(bi)ETVVESSGPK_;_(ac)M(ox)EQFPK(bi)ETVVESSGPK_;_(ac)M(ox)EQFPK(bi)ETVVESSGPK_;_(ac)M(ox)EQFPK(bi)ETVVESSGPK_;_(ac)M(ox)EQFPK(bi)ETVVESSGPK_;_(ac)M(ox)EQFPK(bi)ETVVESSGPK_;_(ac)M(ox)EQFPK(bi)ETVVESSGPK_;_(ac)M(ox)EQFPK(bi)ETVVESSG…	6	NA	0.388852	0.180855	0.326381	0.487382	0.0930631	0.146649	21.9038	22.2766	23.0476	22.792	22.7056	22.7096	21.6802	21.6242	22.0867	21.857	22.1898	21.7841
P02549	Homo sapiens (Human)	Spectrin alpha chain, erythrocytic 1 (Erythroid alpha-spectrin)	SPTA1 SPTA	Biotin (K)	0	1	3	VLQEESQNKEISSKIEALNEKTPSLAK	_VLQEESQNKEISSKIEALNEK(bi)TPSLAK_;_VLQEESQNKEISSKIEALNEK(bi)TPSLAK_;_VLQEESQNKEISSKIEALNEK(bi)TPSLAK_;_VLQEESQNKEISSKIEALNEK(bi)TPSLAK_;_VLQEESQNKEISSKIEALNEK(bi)TPSLAK_;_VLQEESQNKEISSKIEALNEK(bi)TPSLAK_;_VLQEESQNKEISSKIEALNEK(bi)TPSLAK_;_VLQEESQNKEISSKIEALNEK(bi)TPSLAK_;_VLQEESQNKEISSKIEALNEK(bi)TPSLAK_;_VLQEESQNKEISSKIEALNEK(bi)TPSLAK_;_VLQEESQNKEISSKIEALNEK(bi)TPSLAK_;_VLQEESQNKEISSKIEALNEK(bi…	1909	NA	0.786929	0.0447459	-0.189309	0.334335	0.143109	-0.424365	24.2272	22.9474	22.4853	23.8206	22.7057	22.5657	24.6171	23.7284	24.2302	24.3413	23.4205	23.5408
P02730	Homo sapiens (Human)	Band 3 anion transport protein (Anion exchange protein 1) (AE 1) (Anion exchanger 1) (Solute carrier family 4 member 1) (CD antigen CD233)	SLC4A1 AE1 DI EPB3	Biotin (K)	0	1	1	HSHAGELEALGGVKPAVLTR	_HSHAGELEALGGVK(bi)PAVLTR_;_HSHAGELEALGGVK(bi)PAVLTR_;_HSHAGELEALGGVK(bi)PAVLTR_;_HSHAGELEALGGVK(bi)PAVLTR_;_HSHAGELEALGGVK(bi)PAVLTR_;_HSHAGELEALGGVK(bi)PAVLTR_;_HSHAGELEALGGVK(bi)PAVLTR_;_HSHAGELEALGGVK(bi)PAVLTR_;_HSHAGELEALGGVK(bi)PAVLTR_;_HSHAGELEALGGVK(bi)PAVLTR_;_HSHAGELEALGGVK(bi)PAVLTR_;_HSHAGELEALGGVK(bi)PAVLTR_;_HSHAGELEALGGVK(bi)PAVLTR_;_HSHAGELEALGGVK(bi)PAVLTR_;_HSHAGELEALGGVK(bi)PA…	174	NA	0.552731	0.111908	0.117388	0.434605	0.108146	0.270295	23.6663	23.8596	23.5063	24.0872	23.7057	23.5915	22.2772	22.1027	22.2632	22.7826	22.7997	21.8717
P02730	Homo sapiens (Human)	Band 3 anion transport protein (Anion exchange protein 1) (AE 1) (Anion exchanger 1) (Solute carrier family 4 member 1) (CD antigen CD233)	SLC4A1 AE1 DI EPB3	Biotin (K)	0	1	3	RRYQSSPAKPDSSFYK	_RRYQSSPAK(bi)PDSSFYK_;_RRYQSSPAK(bi)PDSSFYK_;_RRYQSSPAK(bi)PDSSFYK_;_RRYQSSPAK(bi)PDSSFYK_;_RRYQSSPAK(bi)PDSSFYK_	353	NA	0.0223136	0.775436	0.942306	NA	NA	NA	19.5998	19.8154	19.7076	20.8566	20.9458	20.1473	NA	NA	NA	NA	NA	NA
P02730	Homo sapiens (Human)	Band 3 anion transport protein (Anion exchange protein 1) (AE 1) (Anion exchanger 1) (Solute carrier family 4 member 1) (CD antigen CD233)	SLC4A1 AE1 DI EPB3	Biotin (K)	0	1	2	RYQSSPAKPDSSFYK	_RYQSSPAK(bi)PDSSFYK_;_RYQSSPAK(bi)PDSSFYK_;_RYQSSPAK(bi)PDSSFYK_;_RYQSSPAK(bi)PDSSFYK_;_RYQSSPAK(bi)PDSSFYK_;_RYQSSPAK(bi)PDSSFYK_;_RYQSSPAK(bi)PDSSFYK_;_RYQSSPAK(bi)PDSSFYK_;_RYQSSPAK(bi)PDSSFYK_;_RYQSSPAK(bi)PDSSFYK_;_RYQSSPAK(bi)PDSSFYK_;_RYQSSPAK(bi)PDSSFYK_;_RYQSSPAK(bi)PDSSFYK_	353	NA	0.946506	0.0121637	0.0159344	0.291841	0.153399	0.418225	23.2132	23.5829	23.069	23.1958	23.6237	23.0935	22.6919	22.7115	22.5703	22.8878	23.7396	22.601
P02730	Homo sapiens (Human)	Band 3 anion transport protein (Anion exchange protein 1) (AE 1) (Anion exchanger 1) (Solute carrier family 4 member 1) (CD antigen CD233)	SLC4A1 AE1 DI EPB3	Biotin (K)	0	1	1	YQSSPAKPDSSFYK	_YQSSPAK(bi)PDSSFYK_;_YQSSPAK(bi)PDSSFYK_;_YQSSPAK(bi)PDSSFYK_;_YQSSPAK(bi)PDSSFYK_;_YQSSPAK(bi)PDSSFYK_;_YQSSPAK(bi)PDSSFYK_;_YQSSPAK(bi)PDSSFYK_;_YQSSPAK(bi)PDSSFYK_;_YQSSPAK(bi)PDSSFYK_;_YQSSPAK(bi)PDSSFYK_;_YQSSPAK(bi)PDSSFYK_;_YQSSPAK(bi)PDSSFYK_;_YQSSPAK(bi)PDSSFYK_;_YQSSPAK(bi)PDSSFYK_;_YQSSPAK(bi)PDSSFYK_;_YQSSPAK(bi)PDSSFYK_;_YQSSPAK(bi)PDSSFYK_;_YQS(ph)S(ph)PAKPDS(ph)S(ph)FY(ph)K(bi)_	353;360	NA	0.631897	0.0830016	0.150211	0.203365	0.188886	0.230262	25.3048	26.0999	25.5522	26.1425	25.647	25.6181	25.5555	25.2442	25.6574	25.5424	25.8016	25.8039
P04921	Homo sapiens (Human)	Glycophorin-C (Glycoconnectin) (Glycophorin-D) (GPD) (Glycoprotein beta) (PAS-2') (Sialoglycoprotein D) (CD antigen CD236)	GYPC GLPC GPC	Biotin (K)	0	1	2	GTEFAESADAALQGDPALQDAGDSSRKEYFI	_GTEFAESADAALQGDPALQDAGDSSRK(bi)EYFI_;_GTEFAESADAALQGDPALQDAGDSSRK(bi)EYFI_	124	NA	NA	NA	NA	NA	NA	NA	NA	NA	NA	NA	NA	NA	NA	NA	NA	NA	NA	NA
P06703	Homo sapiens (Human)	Protein S100-A6 (Calcyclin) (Growth factor-inducible protein 2A9) (MLN 4) (Prolactin receptor-associated protein) (PRA) (S100 calcium-binding protein A6)	S100A6 CACY	Biotin (K)	0	1	2	ELIQKELTIGSKLQDAEIAR	_ELIQKELTIGSK(bi)LQDAEIAR_	47	NA	NA	NA	NA	NA	NA	NA	NA	NA	NA	NA	NA	NA	NA	NA	NA	NA	NA	NA
P06703	Homo sapiens (Human)	Protein S100-A6 (Calcyclin) (Growth factor-inducible protein 2A9) (MLN 4) (Prolactin receptor-associated protein) (PRA) (S100 calcium-binding protein A6)	S100A6 CACY	Biotin (K)	0	1	1	ELTIGSKLQDAEIAR	_ELTIGSK(bi)LQDAEIAR_;_ELTIGSK(bi)LQDAEIAR_;_ELTIGSK(bi)LQDAEIAR_;_ELTIGSK(bi)LQDAEIAR_;_ELTIGSK(bi)LQDAEIAR_;_ELTIGSK(bi)LQDAEIAR_;_ELTIGSK(bi)LQDAEIAR_;_ELTIGSK(bi)LQDAEIAR_;_ELTIGSK(bi)LQDAEIAR_;_ELTIGSK(bi)LQDAEIAR_;_ELTIGSK(bi)LQDAEIAR_;_ELTIGSK(bi)LQDAEIAR_;_ELTIGSK(bi)LQDAEIAR_;_ELTIGSK(bi)LQDAEIAR_;_ELTIGSK(bi)LQDAEIAR_;_ELTIGSK(bi)LQDAEIAR_	47	NA	0.710291	0.0611878	-0.108439	0.529055	0.079631	-0.434851	21.252	21.6409	21.8679	21.1209	21.8266	21.4879	21.6813	21.3426	20.4882	19.8532	21.6618	20.6926
P07900	Homo sapiens (Human)	Heat shock protein HSP 90-alpha (EC 3.6.4.10) (Heat shock 86 kDa) (HSP 86) (HSP86) (Lipopolysaccharide-associated protein 2) (LAP-2) (LPS-associated protein 2) (Renal carcinoma antigen NY-REN-38)	HSP90AA1 HSP90A HSPC1 HSPCA	Biotin (K)	0	1	1	IMKAQALR	_IMK(bi)AQALR_;_IMK(bi)AQALR_;_IMK(bi)AQALR_;_IMK(bi)AQALR_	615	NA	NA	NA	NA	0.639586	0.0612227	0.0749621	NA	NA	NA	NA	NA	NA	20.2705	20.3046	20.2364	20.5999	20.3455	20.0911
P08238	Homo sapiens (Human)	Heat shock protein HSP 90-beta (HSP 90) (Heat shock 84 kDa) (HSP 84) (HSP84)	HSP90AB1 HSP90B HSPC2 HSPCB	Biotin (K)	0	1	1	IMKAQALR	_IMK(bi)AQALR_;_IMK(bi)AQALR_;_IMK(bi)AQALR_;_IMK(bi)AQALR_	607	NA	NA	NA	NA	0.639586	0.0612227	0.0749621	NA	NA	NA	NA	NA	NA	20.2705	20.3046	20.2364	20.5999	20.3455	20.0911
P09105	Homo sapiens (Human)	Hemoglobin subunit theta-1 (Hemoglobin theta-1 chain) (Theta-1-globin)	HBQ1	Biotin (K)	0	1	1	TFLAFPATKTYFSHLDLSPGSSQVR	_TFLAFPATK(bi)TYFSHLDLSPGSSQVR_;_TFLAFPATK(bi)TYFSHLDLSPGSSQVR_;_TFLAFPATK(bi)TYFSHLDLSPGSSQVR_;_TFLAFPATK(bi)TYFSHLDLSPGSSQVR_;_TFLAFPATK(bi)TYFSHLDLSPGSSQVR_;_TFLAFPATK(bi)TYFSHLDLSPGSSQVR_;_TFLAFPATK(bi)TYFSHLDLSPGSSQVR_;_TFLAFPATK(bi)TYFSHLDLSPGSSQVR_;_TFLAFPATK(bi)TYFSHLDLSPGSSQVR_	41	NA	0.820162	0.037225	0.0764031	NA	NA	NA	22.0481	21.4027	21.7254	22.1268	21.3018	21.9767	NA	NA	NA	NA	NA	NA
P09651	Homo sapiens (Human)	Heterogeneous nuclear ribonucleoprotein A1 (hnRNP A1) (Helix-destabilizing protein) (Single-strand RNA-binding protein) (hnRNP core protein A1) [Cleaved into: Heterogeneous nuclear ribonucleoprotein A1, N-terminally processed]	HNRNPA1 HNRPA1	Acetyl (Protein N-term);Biotin (K)	0	1	3	SKSESPKEPEQLRK	_(ac)SK(bi)SESPKEPEQLRK_;_(ac)SK(bi)SESPKEPEQLRK_;_(ac)SK(bi)SESPKEPEQLRK_;_(ac)SK(bi)SESPKEPEQLRK_;_(ac)SK(bi)SESPKEPEQLRK_;_(ac)SK(bi)SESPKEPEQLRK_;_(ac)SK(bi)SESPKEPEQLRK_	3	NA	0.912707	0.0194474	0.0382914	NA	NA	NA	20.5809	20.4278	20.8926	20.1556	21.1885	20.672	NA	NA	NA	NA	NA	NA
P0DMV8	Homo sapiens (Human)	Heat shock 70 kDa protein 1A (Heat shock 70 kDa protein 1) (HSP70-1) (HSP70.1)	HSPA1A HSP72 HSPA1 HSX70	Biotin (K)	0	1	1	ITITNDKGR	_ITITNDK(bi)GR_;_ITITNDK(bi)GR_;_ITITNDK(bi)GR_;_ITITNDK(bi)GR_;_ITITNDK(bi)GR_;_ITITNDK(bi)GR_;_ITITNDK(bi)GR_;_ITITNDK(bi)GR_;_ITITNDK(bi)GR_;_ITITNDK(bi)GR_;_ITITNDK(bi)GR_	507	NA	0.296138	0.243936	-0.170136	0.552842	0.0747631	-0.0962039	20.9319	20.9509	21.3017	20.7546	21.0132	20.9063	22.369	22.4758	22.4195	22.5772	22.3253	22.0734
P0DMV9	Homo sapiens (Human)	Heat shock 70 kDa protein 1B (Heat shock 70 kDa protein 2) (HSP70-2) (HSP70.2)	HSPA1B HSP72	Biotin (K)	0	1	1	ITITNDKGR	_ITITNDK(bi)GR_;_ITITNDK(bi)GR_;_ITITNDK(bi)GR_;_ITITNDK(bi)GR_;_ITITNDK(bi)GR_;_ITITNDK(bi)GR_;_ITITNDK(bi)GR_;_ITITNDK(bi)GR_;_ITITNDK(bi)GR_;_ITITNDK(bi)GR_;_ITITNDK(bi)GR_	507	NA	0.296138	0.243936	-0.170136	0.552842	0.0747631	-0.0962039	20.9319	20.9509	21.3017	20.7546	21.0132	20.9063	22.369	22.4758	22.4195	22.5772	22.3253	22.0734
P11142	Homo sapiens (Human)	Heat shock cognate 71 kDa protein (EC 3.6.4.10) (Heat shock 70 kDa protein 8) (Lipopolysaccharide-associated protein 1) (LAP-1) (LPS-associated protein 1)	HSPA8 HSC70 HSP73 HSPA10	Biotin (K)	0	1	1	ITITNDKGR	_ITITNDK(bi)GR_;_ITITNDK(bi)GR_;_ITITNDK(bi)GR_;_ITITNDK(bi)GR_;_ITITNDK(bi)GR_;_ITITNDK(bi)GR_;_ITITNDK(bi)GR_;_ITITNDK(bi)GR_;_ITITNDK(bi)GR_;_ITITNDK(bi)GR_;_ITITNDK(bi)GR_	507	NA	0.296138	0.243936	-0.170136	0.552842	0.0747631	-0.0962039	20.9319	20.9509	21.3017	20.7546	21.0132	20.9063	22.369	22.4758	22.4195	22.5772	22.3253	22.0734
P11166	Homo sapiens (Human)	Solute carrier family 2, facilitated glucose transporter member 1 (Glucose transporter type 1, erythrocyte/brain) (GLUT-1) (HepG2 glucose transporter)	SLC2A1 GLUT1	Biotin (K)	0	1	1	QGGASQSDKTPEELFHPLGADSQV	_QGGASQSDK(bi)TPEELFHPLGADSQV_;_QGGASQSDK(bi)TPEELFHPLGADSQV_;_QGGASQSDK(bi)TPEELFHPLGADSQV_;_QGGASQSDK(bi)TPEELFHPLGADSQV_;_QGGASQSDK(bi)TPEELFHPLGADSQV_;_QGGASQSDK(bi)TPEELFHPLGADSQV_;_QGGASQSDK(bi)TPEELFHPLGADSQV_;_QGGASQSDK(bi)TPEELFHPLGADSQV_;_QGGASQSDK(bi)TPEELFHPLGADSQV_;_QGGASQSDK(bi)TPEELFHPLGADSQV_;_QGGASQSDK(bi)TPEELFHPLGADSQV_;_QGGASQSDK(bi)TPEELFHPLGADSQV_;_QGGASQSDK(bi)TPEELFHPLGADS…	477	NA	0.772245	0.0447459	0.0728378	0.85861	0.0171643	-0.0263314	28.0678	28.599	28.1488	28.3235	28.6447	28.066	25.9831	26.004	25.7197	25.6963	26.0572	25.8742
P11166	Homo sapiens (Human)	Solute carrier family 2, facilitated glucose transporter member 1 (Glucose transporter type 1, erythrocyte/brain) (GLUT-1) (HepG2 glucose transporter)	SLC2A1 GLUT1	Biotin (K);Phospho (STY)	1	1	1	QGGASQSDKTPEELFHPLGADSQV	_QGGASQSDK(bi)TPEELFHPLGADSQV_;_QGGASQSDK(bi)TPEELFHPLGADSQV_;_QGGASQSDK(bi)TPEELFHPLGADSQV_;_QGGASQSDK(bi)TPEELFHPLGADSQV_;_QGGASQSDK(bi)TPEELFHPLGADSQV_;_QGGASQSDK(bi)TPEELFHPLGADSQV_;_QGGASQSDK(bi)TPEELFHPLGADSQV_;_QGGASQSDK(bi)TPEELFHPLGADSQV_;_QGGASQSDK(bi)TPEELFHPLGADSQV_;_QGGASQSDK(bi)TPEELFHPLGADSQV_;_QGGASQSDK(bi)TPEELFHPLGADSQV_;_QGGASQSDK(bi)TPEELFHPLGADSQV_;_QGGASQSDK(bi)TPEELFHPLGADS…	477	490	NA	NA	NA	NA	NA	NA	NA	NA	NA	NA	NA	NA	NA	NA	NA	NA	NA	NA
P11171	Homo sapiens (Human)	Protein 4.1 (P4.1) (4.1R) (Band 4.1) (EPB4.1) (Erythrocyte membrane protein band 4.1)	EPB41 E41P	Biotin (K)	0	1	2	EAKEQHPDMSVTKVVVHQETEIADE	_EAKEQHPDMSVTK(bi)VVVHQETEIADE_;_EAKEQHPDMSVTK(bi)VVVHQETEIADE_;_EAKEQHPDMSVTK(bi)VVVHQETEIADE_;_EAKEQHPDMSVTK(bi)VVVHQETEIADE_;_EAKEQHPDMSVTK(bi)VVVHQETEIADE_;_EAKEQHPDMSVTK(bi)VVVHQETEIADE_;_EAKEQHPDMSVTK(bi)VVVHQETEIADE_;_EAKEQHPDMSVTK(bi)VVVHQETEIADE_;_EAKEQHPDMSVTK(bi)VVVHQETEIADE_;_EAKEQHPDMSVTK(bi)VVVHQETEIADE_;_EAKEQHPDMSVTK(bi)VVVHQETEIADE_	852	NA	0.105204	0.49141	0.542121	NA	NA	NA	23.8396	23.9351	23.7483	23.8766	24.6001	24.6726	NA	NA	NA	NA	NA	NA
P11171	Homo sapiens (Human)	Protein 4.1 (P4.1) (4.1R) (Band 4.1) (EPB4.1) (Erythrocyte membrane protein band 4.1)	EPB41 E41P	Biotin (K);Phospho (STY)	1	1	1	EQHPDMSVTKVVVHQETEIADE	_EQHPDMSVTK(bi)VVVHQETEIADE_;_EQHPDMSVTK(bi)VVVHQETEIADE_;_EQHPDMSVTK(bi)VVVHQETEIADE_;_EQHPDMSVTK(bi)VVVHQETEIADE_;_EQHPDMSVTK(bi)VVVHQETEIADE_;_EQHPDMSVTK(bi)VVVHQETEIADE_;_EQHPDMSVTK(bi)VVVHQETEIADE_;_EQHPDMSVTK(bi)VVVHQETEIADE_;_EQHPDMSVTK(bi)VVVHQETEIADE_;_EQHPDMSVTK(bi)VVVHQETEIADE_;_EQHPDMSVTK(bi)VVVHQETEIADE_;_EQHPDMSVTK(bi)VVVHQETEIADE_;_EQHPDMSVTK(bi)VVVHQETEIADE_;_EQHPDMSVTK(bi)VVVHQET…	852	849;851	0.368368	0.186911	0.277468	0.222745	0.182026	0.241562	23.1992	23.9072	23.5532	23.4661	24.0223	24.0036	21.6548	21.9823	21.8064	21.8524	21.9961	22.3198
P11171	Homo sapiens (Human)	Protein 4.1 (P4.1) (4.1R) (Band 4.1) (EPB4.1) (Erythrocyte membrane protein band 4.1)	EPB41 E41P	Biotin (K)	0	1	1	EQHPDMSVTKVVVHQETEIADE	_EQHPDMSVTK(bi)VVVHQETEIADE_;_EQHPDMSVTK(bi)VVVHQETEIADE_;_EQHPDMSVTK(bi)VVVHQETEIADE_;_EQHPDMSVTK(bi)VVVHQETEIADE_;_EQHPDMSVTK(bi)VVVHQETEIADE_;_EQHPDMSVTK(bi)VVVHQETEIADE_;_EQHPDMSVTK(bi)VVVHQETEIADE_;_EQHPDMSVTK(bi)VVVHQETEIADE_;_EQHPDMSVTK(bi)VVVHQETEIADE_;_EQHPDMSVTK(bi)VVVHQETEIADE_;_EQHPDMSVTK(bi)VVVHQETEIADE_;_EQHPDMSVTK(bi)VVVHQETEIADE_;_EQHPDMSVTK(bi)VVVHQETEIADE_;_EQHPDMSVTK(bi)VVVHQET…	852	NA	0.449181	0.153992	0.140818	0.00382483	0.997031	-0.62948	25.9943	26.3615	26.2015	26.1425	26.2593	26.578	25.3922	25.4979	25.445	24.6425	24.8156	24.9887
P11171	Homo sapiens (Human)	Protein 4.1 (P4.1) (4.1R) (Band 4.1) (EPB4.1) (Erythrocyte membrane protein band 4.1)	EPB41 E41P	Biotin (K);Oxidation (M)	0	1	1	EQHPDMSVTKVVVHQETEIADE	_EQHPDMSVTK(bi)VVVHQETEIADE_;_EQHPDMSVTK(bi)VVVHQETEIADE_;_EQHPDMSVTK(bi)VVVHQETEIADE_;_EQHPDMSVTK(bi)VVVHQETEIADE_;_EQHPDMSVTK(bi)VVVHQETEIADE_;_EQHPDMSVTK(bi)VVVHQETEIADE_;_EQHPDMSVTK(bi)VVVHQETEIADE_;_EQHPDMSVTK(bi)VVVHQETEIADE_;_EQHPDMSVTK(bi)VVVHQETEIADE_;_EQHPDMSVTK(bi)VVVHQETEIADE_;_EQHPDMSVTK(bi)VVVHQETEIADE_;_EQHPDMSVTK(bi)VVVHQETEIADE_;_EQHPDMSVTK(bi)VVVHQETEIADE_;_EQHPDMSVTK(bi)VVVHQET…	852	NA	0.870395	0.0301873	-0.0512261	0.000130434	1.31572	3.02706	23.6575	23.5353	23.7797	23.4933	23.1771	24.1484	18.9202	19.1841	19.5275	22.4357	22.0488	22.2286
P11171	Homo sapiens (Human)	Protein 4.1 (P4.1) (4.1R) (Band 4.1) (EPB4.1) (Erythrocyte membrane protein band 4.1)	EPB41 E41P	Biotin (K);Oxidation (M);Phospho (STY)	1	1	1	EQHPDMSVTKVVVHQETEIADE	_EQHPDMSVTK(bi)VVVHQETEIADE_;_EQHPDMSVTK(bi)VVVHQETEIADE_;_EQHPDMSVTK(bi)VVVHQETEIADE_;_EQHPDMSVTK(bi)VVVHQETEIADE_;_EQHPDMSVTK(bi)VVVHQETEIADE_;_EQHPDMSVTK(bi)VVVHQETEIADE_;_EQHPDMSVTK(bi)VVVHQETEIADE_;_EQHPDMSVTK(bi)VVVHQETEIADE_;_EQHPDMSVTK(bi)VVVHQETEIADE_;_EQHPDMSVTK(bi)VVVHQETEIADE_;_EQHPDMSVTK(bi)VVVHQETEIADE_;_EQHPDMSVTK(bi)VVVHQETEIADE_;_EQHPDMSVTK(bi)VVVHQETEIADE_;_EQHPDMSVTK(bi)VVVHQET…	852	849;851	NA	NA	NA	NA	NA	NA	NA	NA	NA	NA	NA	NA	NA	NA	NA	NA	NA	NA
P11171	Homo sapiens (Human)	Protein 4.1 (P4.1) (4.1R) (Band 4.1) (EPB4.1) (Erythrocyte membrane protein band 4.1)	EPB41 E41P	Biotin (K)	0	1	1	FLALGSKFR	_FLALGSK(bi)FR_;_FLALGSK(bi)FR_;_FLALGSK(bi)FR_;_FLALGSK(bi)FR_;_FLALGSK(bi)FR_;_FLALGSK(bi)FR_;_FLALGSK(bi)FR_;_FLALGSK(bi)FR_;_FLALGSK(bi)FR_;_FLALGSK(bi)FR_;_FLALGSK(bi)FR_;_FLALGSK(bi)FR_	506	NA	0.438969	0.159438	0.149551	0.978077	0.00604494	0.00815528	22.6223	22.7325	22.9294	23.1623	22.646	22.9245	22.0414	21.568	22.5259	21.9857	22.0621	22.1121
P11171	Homo sapiens (Human)	Protein 4.1 (P4.1) (4.1R) (Band 4.1) (EPB4.1) (Erythrocyte membrane protein band 4.1)	EPB41 E41P	Biotin (K)	0	1	2	GGISETRIEKR	_GGISETRIEK(bi)R_;_GGISETRIEK(bi)R_;_GGISETRIEK(bi)R_;_GGISETRIEK(bi)R_;_GGISETRIEK(bi)R_;_GGISETRIEK(bi)R_;_GGISETRIEK(bi)R_;_GGISETRIEK(bi)R_;_GGISETRIEK(bi)R_;_GGISETRIEK(bi)R_;_GGISETRIEK(bi)R_;_GGISETRIEK(bi)R_;_GGISETRIEK(bi)R_	818	NA	0.0847429	0.523817	5.74917	0.357394	0.133818	-1.00592	27.3325	19.5761	20.0517	28.4786	28.0693	27.6599	23.4167	25.011	24.7109	24.1038	21.7073	24.3097
P11171	Homo sapiens (Human)	Protein 4.1 (P4.1) (4.1R) (Band 4.1) (EPB4.1) (Erythrocyte membrane protein band 4.1)	EPB41 E41P	Biotin (K)	0	1	1	HHASISELKK	_HHASISELK(bi)K_;_HHASISELKK(bi)_;_HHASISELK(bi)K_;_HHASISELK(bi)K_;_HHASISELK(bi)K_;_HHASISELK(bi)K_;_HHASISELKK(bi)_;_HHASISELKK(bi)_;_HHASISELK(bi)K_;_HHASISELKK(bi)_;_HHASISELK(bi)K_;_HHASISELK(bi)K_;_HHASISELK(bi)K_;_HHASISELK(bi)K_;_HHASISELK(bi)K_;_HHASISELK(bi)K_;_HHASISELK(bi)K_;_HHASISELKK(bi)_;_HHASISELKK(bi)_;_HHASISELKK(bi)_;_HHASISELK(bi)K_;_HHASISELKK(bi)_;_HHASISELKK(bi)_;_HHASISE…	689;690	NA	0.288355	0.251173	0.140128	0.641132	0.0612227	0.0959419	23.2816	23.3547	23.5148	23.362	23.6789	23.5306	22.7604	23.2992	23.2155	23.0875	23.106	23.3695
P11171	Homo sapiens (Human)	Protein 4.1 (P4.1) (4.1R) (Band 4.1) (EPB4.1) (Erythrocyte membrane protein band 4.1)	EPB41 E41P	Biotin (K)	0	1	3	HHASISELKKNFMESVPEPRPSEWDK	_HHASISELKK(bi)NFMESVPEPRPSEWDK_	690	NA	NA	NA	NA	NA	NA	NA	NA	NA	NA	NA	NA	NA	NA	NA	NA	NA	NA	NA
P11171	Homo sapiens (Human)	Protein 4.1 (P4.1) (4.1R) (Band 4.1) (EPB4.1) (Erythrocyte membrane protein band 4.1)	EPB41 E41P	Biotin (K);Oxidation (M)	0	1	2	HSNLMLEDLDKSQEEIKK	_HSNLMLEDLDK(bi)SQEEIKK_;_HSNLMLEDLDKSQEEIK(bi)K_;_HSNLMLEDLDKSQEEIK(bi)K_;_HSNLMLEDLDK(bi)SQEEIKK_;_HSNLMLEDLDKSQEEIK(bi)K_;_HSNLMLEDLDK(bi)SQEEIKK_;_HSNLMLEDLDK(bi)SQEEIKK_;_HSNLMLEDLDKSQEEIK(bi)K_;_HSNLMLEDLDK(bi)SQEEIKK_;_HSNLMLEDLDKSQEEIK(bi)K_;_HSNLMLEDLDK(bi)SQEEIKK_;_HSNLMLEDLDKSQEEIK(bi)K_;_HSNLMLEDLDK(bi)SQEEIKK_;_HSNLMLEDLDK(bi)SQEEIKK_;_HSNLMLEDLDK(bi)SQEEIKK_;_HSNLMLEDLDK(bi)SQEEIKK_…	673;679	NA	NA	NA	NA	NA	NA	NA	NA	NA	NA	NA	NA	NA	NA	NA	NA	NA	NA	NA
P11171	Homo sapiens (Human)	Protein 4.1 (P4.1) (4.1R) (Band 4.1) (EPB4.1) (Erythrocyte membrane protein band 4.1)	EPB41 E41P	Biotin (K)	0	1	2	HSNLMLEDLDKSQEEIKK	_HSNLMLEDLDK(bi)SQEEIKK_;_HSNLMLEDLDKSQEEIK(bi)K_;_HSNLMLEDLDKSQEEIK(bi)K_;_HSNLMLEDLDK(bi)SQEEIKK_;_HSNLMLEDLDKSQEEIK(bi)K_;_HSNLMLEDLDK(bi)SQEEIKK_;_HSNLMLEDLDK(bi)SQEEIKK_;_HSNLMLEDLDKSQEEIK(bi)K_;_HSNLMLEDLDK(bi)SQEEIKK_;_HSNLMLEDLDKSQEEIK(bi)K_;_HSNLMLEDLDK(bi)SQEEIKK_;_HSNLMLEDLDKSQEEIK(bi)K_;_HSNLMLEDLDK(bi)SQEEIKK_;_HSNLMLEDLDK(bi)SQEEIKK_;_HSNLMLEDLDK(bi)SQEEIKK_;_HSNLMLEDLDK(bi)SQEEIKK_…	673;679	NA	0.471022	0.143157	0.445324	0.569885	0.0743459	-0.141661	22.2894	24.1482	23.6703	23.9239	23.7493	23.7707	22.9465	23.3217	23.3407	22.6873	23.3046	23.192
P11171	Homo sapiens (Human)	Protein 4.1 (P4.1) (4.1R) (Band 4.1) (EPB4.1) (Erythrocyte membrane protein band 4.1)	EPB41 E41P	Biotin (K)	0	1	1	IVITGDADIDHDQVLVQAIKEAK	_IVITGDADIDHDQVLVQAIK(bi)EAK_;_IVITGDADIDHDQVLVQAIK(bi)EAK_;_IVITGDADIDHDQVLVQAIK(bi)EAK_;_IVITGDADIDHDQVLVQAIK(bi)EAK_;_IVITGDADIDHDQVLVQAIK(bi)EAK_;_IVITGDADIDHDQVLVQAIK(bi)EAK_;_IVITGDADIDHDQVLVQAIKEAK(bi)_;_IVITGDADIDHDQVLVQAIK(bi)EAK_	839;842	NA	0.408901	0.170861	0.271288	NA	NA	NA	22.8179	22.7396	21.935	22.6182	22.9085	22.7797	NA	NA	NA	NA	NA	NA
P11171	Homo sapiens (Human)	Protein 4.1 (P4.1) (4.1R) (Band 4.1) (EPB4.1) (Erythrocyte membrane protein band 4.1)	EPB41 E41P	Biotin (K)	0	1	1	KHHASISELK	_K(bi)HHASISELK_;_K(bi)HHASISELK_	680	NA	NA	NA	NA	NA	NA	NA	NA	NA	NA	NA	NA	NA	NA	NA	NA	NA	NA	NA
P11171	Homo sapiens (Human)	Protein 4.1 (P4.1) (4.1R) (Band 4.1) (EPB4.1) (Erythrocyte membrane protein band 4.1)	EPB41 E41P	Biotin (K)	0	1	2	KHHASISELKK	_K(bi)HHASISELKK_;_K(bi)HHASISELKK_;_K(bi)HHASISELKK_	680	NA	NA	NA	NA	NA	NA	NA	NA	NA	NA	NA	NA	NA	NA	NA	NA	NA	NA	NA
P11171	Homo sapiens (Human)	Protein 4.1 (P4.1) (4.1R) (Band 4.1) (EPB4.1) (Erythrocyte membrane protein band 4.1)	EPB41 E41P	Biotin (K)	0	1	1	KNFMESVPEPR	_K(bi)NFM(ox)ESVPEPR_;_K(bi)NFM(ox)ESVPEPR_;_K(bi)NFM(ox)ESVPEPR_;_K(bi)NFM(ox)ESVPEPR_;_K(bi)NFM(ox)ESVPEPR_;_K(bi)NFM(ox)ESVPEPR_;_K(bi)NFM(ox)ESVPEPR_;_K(bi)NFM(ox)ESVPEPR_;_K(bi)NFM(ox)ESVPEPR_;_K(bi)NFM(ox)ESVPEPR_;_K(bi)NFM(ox)ESVPEPR_;_K(bi)NFM(ox)ESVPEPR_;_K(bi)NFMESVPEPR_;_K(bi)NFMESVPEPR_;_K(bi)NFMESVPEPR_;_K(bi)NFMESVPEPR_;_K(bi)NFMESVPEPR_;_K(bi)NFMESVPEPR_;_K(bi)NFMESVPEPR_;_K(bi)NFM…	690	NA	0.0614173	0.586202	-0.675856	0.958002	0.0109965	-0.00982139	23.9614	23.6628	23.354	22.7956	22.7819	23.3731	23.4442	23.7535	23.6695	23.5112	23.9059	23.4205
P11171	Homo sapiens (Human)	Protein 4.1 (P4.1) (4.1R) (Band 4.1) (EPB4.1) (Erythrocyte membrane protein band 4.1)	EPB41 E41P	Biotin (K);Oxidation (M)	0	1	1	KNFMESVPEPR	_K(bi)NFM(ox)ESVPEPR_;_K(bi)NFM(ox)ESVPEPR_;_K(bi)NFM(ox)ESVPEPR_;_K(bi)NFM(ox)ESVPEPR_;_K(bi)NFM(ox)ESVPEPR_;_K(bi)NFM(ox)ESVPEPR_;_K(bi)NFM(ox)ESVPEPR_;_K(bi)NFM(ox)ESVPEPR_;_K(bi)NFM(ox)ESVPEPR_;_K(bi)NFM(ox)ESVPEPR_;_K(bi)NFM(ox)ESVPEPR_;_K(bi)NFM(ox)ESVPEPR_;_K(bi)NFMESVPEPR_;_K(bi)NFMESVPEPR_;_K(bi)NFMESVPEPR_;_K(bi)NFMESVPEPR_;_K(bi)NFMESVPEPR_;_K(bi)NFMESVPEPR_;_K(bi)NFMESVPEPR_;_K(bi)NFM…	690	NA	0.234209	0.298069	-0.397246	0.487396	0.0930631	0.117349	21.4455	21.7427	21.9863	21.0773	21.1043	21.8011	22.2289	22.085	21.8168	22.35	22.0524	22.0804
P11171	Homo sapiens (Human)	Protein 4.1 (P4.1) (4.1R) (Band 4.1) (EPB4.1) (Erythrocyte membrane protein band 4.1)	EPB41 E41P	Biotin (K)	0	1	2	KNFMESVPEPRPSEWDK	_K(bi)NFMESVPEPRPSEWDK_;_K(bi)NFMESVPEPRPSEWDK_;_K(bi)NFMESVPEPRPSEWDK_;_K(bi)NFMESVPEPRPSEWDK_;_K(bi)NFMESVPEPRPSEWDK_;_K(bi)NFMESVPEPRPSEWDK_;_K(bi)NFMESVPEPRPSEWDK_;_K(bi)NFMESVPEPRPSEWDK_;_K(bi)NFMESVPEPRPSEWDK_;_K(bi)NFMESVPEPRPSEWDK_;_K(bi)NFMESVPEPRPSEWDK_;_K(bi)NFMESVPEPRPSEWDK_;_K(bi)NFMESVPEPRPSEWDK_;_K(bi)NFMESVPEPRPSEWDK_;_K(bi)NFMESVPEPRPSEWDK_	690	NA	0.0370771	0.688744	-1.07631	0.0319802	0.534622	-1.03919	24.8121	24.9533	23.8627	23.3423	23.4655	23.5915	24.4676	24.4653	24.4699	22.8086	23.5889	23.8879
P11171	Homo sapiens (Human)	Protein 4.1 (P4.1) (4.1R) (Band 4.1) (EPB4.1) (Erythrocyte membrane protein band 4.1)	EPB41 E41P	Biotin (K)	0	1	3	KNFMESVPEPRPSEWDKR	_K(bi)NFM(ox)ESVPEPRPSEWDKR_;_K(bi)NFM(ox)ESVPEPRPSEWDKR_;_K(bi)NFM(ox)ESVPEPRPSEWDKR_;_K(bi)NFM(ox)ESVPEPRPSEWDKR_;_K(bi)NFM(ox)ESVPEPRPSEWDKR_;_K(bi)NFM(ox)ESVPEPRPSEWDKR_;_K(bi)NFM(ox)ESVPEPRPSEWDKR_;_K(bi)NFM(ox)ESVPEPRPSEWDKR_;_K(bi)NFM(ox)ESVPEPRPSEWDKR_;_K(bi)NFM(ox)ESVPEPRPSEWDKR_;_K(bi)NFM(ox)ESVPEPRPSEWDKR_;_K(bi)NFM(ox)ESVPEPRPSEWDKR_;_K(bi)NFM(ox)ESVPEPRPSEWDKR_;_K(bi)NFM(ox)ESVPEPRPS…	690;706	NA	0.622416	0.0856121	-0.0938756	0.211233	0.187444	-0.0800181	28.0966	28.0865	27.5675	27.868	27.7926	27.8083	26.7247	26.7199	26.7427	26.5424	26.7006	26.7043
P11171	Homo sapiens (Human)	Protein 4.1 (P4.1) (4.1R) (Band 4.1) (EPB4.1) (Erythrocyte membrane protein band 4.1)	EPB41 E41P	Biotin (K);Oxidation (M)	0	1	3	KNFMESVPEPRPSEWDKR	_K(bi)NFM(ox)ESVPEPRPSEWDKR_;_K(bi)NFM(ox)ESVPEPRPSEWDKR_;_K(bi)NFM(ox)ESVPEPRPSEWDKR_;_K(bi)NFM(ox)ESVPEPRPSEWDKR_;_K(bi)NFM(ox)ESVPEPRPSEWDKR_;_K(bi)NFM(ox)ESVPEPRPSEWDKR_;_K(bi)NFM(ox)ESVPEPRPSEWDKR_;_K(bi)NFM(ox)ESVPEPRPSEWDKR_;_K(bi)NFM(ox)ESVPEPRPSEWDKR_;_K(bi)NFM(ox)ESVPEPRPSEWDKR_;_K(bi)NFM(ox)ESVPEPRPSEWDKR_;_K(bi)NFM(ox)ESVPEPRPSEWDKR_;_K(bi)NFM(ox)ESVPEPRPSEWDKR_;_K(bi)NFM(ox)ESVPEPRPS…	690;706	NA	0.314869	0.228646	0.189438	0.88007	0.0149963	0.0255286	25.8599	25.8079	26.2936	26.1019	26.2936	26.1341	25.0017	25.2383	25.2544	25.4528	24.9962	25.1219
P11171	Homo sapiens (Human)	Protein 4.1 (P4.1) (4.1R) (Band 4.1) (EPB4.1) (Erythrocyte membrane protein band 4.1)	EPB41 E41P	2 Biotin (K);Oxidation (M)	0	2	3	KNFMESVPEPRPSEWDKR	_K(bi)NFM(ox)ESVPEPRPSEWDKR_;_K(bi)NFM(ox)ESVPEPRPSEWDKR_;_K(bi)NFM(ox)ESVPEPRPSEWDKR_;_K(bi)NFM(ox)ESVPEPRPSEWDKR_;_K(bi)NFM(ox)ESVPEPRPSEWDKR_;_K(bi)NFM(ox)ESVPEPRPSEWDKR_;_K(bi)NFM(ox)ESVPEPRPSEWDKR_;_K(bi)NFM(ox)ESVPEPRPSEWDKR_;_K(bi)NFM(ox)ESVPEPRPSEWDKR_;_K(bi)NFM(ox)ESVPEPRPSEWDKR_;_K(bi)NFM(ox)ESVPEPRPSEWDKR_;_K(bi)NFM(ox)ESVPEPRPSEWDKR_;_K(bi)NFM(ox)ESVPEPRPSEWDKR_;_K(bi)NFM(ox)ESVPEPRPS…	690;706	NA	NA	NA	NA	NA	NA	NA	NA	NA	NA	NA	NA	NA	NA	NA	NA	NA	NA	NA
P11171	Homo sapiens (Human)	Protein 4.1 (P4.1) (4.1R) (Band 4.1) (EPB4.1) (Erythrocyte membrane protein band 4.1)	EPB41 E41P	Biotin (K)	0	1	1	KTVVPK	_K(bi)TVVPK_;_K(bi)TVVPK_;_K(bi)TVVPK_;_K(bi)TVVPK_;_K(bi)TVVPK_;_K(bi)TVVPK_	581	NA	0.0949469	0.505626	0.218234	NA	NA	NA	23.05	22.8159	23.1406	23.1736	23.2638	23.2238	NA	NA	NA	NA	NA	NA
P11171	Homo sapiens (Human)	Protein 4.1 (P4.1) (4.1R) (Band 4.1) (EPB4.1) (Erythrocyte membrane protein band 4.1)	EPB41 E41P	Biotin (K)	0	1	1	LAEKTEDLIR	_LAEK(bi)TEDLIR_;_LAEK(bi)TEDLIR_;_LAEK(bi)TEDLIR_;_LAEK(bi)TEDLIR_;_LAEK(bi)TEDLIR_;_LAEK(bi)TEDLIR_	639	NA	0.865289	0.0307404	-0.0288889	NA	NA	NA	20.6973	20.5328	20.9962	20.6115	20.6474	20.8808	NA	NA	NA	NA	NA	NA
P11171	Homo sapiens (Human)	Protein 4.1 (P4.1) (4.1R) (Band 4.1) (EPB4.1) (Erythrocyte membrane protein band 4.1)	EPB41 E41P	Biotin (K)	0	1	2	LFSSFLKRPK	_LFSSFLK(bi)RPK_;_LFSSFLK(bi)RPK_;_LFSSFLK(bi)RPK_;_LFSSFLK(bi)RPK_;_LFSSFLK(bi)RPK_;_LFSSFLK(bi)RPK_	88	NA	0.250468	0.282505	-0.163279	NA	NA	NA	21.5515	21.1539	21.2914	21.2157	21.1899	21.1014	NA	NA	NA	NA	NA	NA
P11171	Homo sapiens (Human)	Protein 4.1 (P4.1) (4.1R) (Band 4.1) (EPB4.1) (Erythrocyte membrane protein band 4.1)	EPB41 E41P	Biotin (K)	0	1	2	NFMESVPEPRPSEWDKR	_NFM(ox)ESVPEPRPSEWDK(bi)R_;_NFM(ox)ESVPEPRPSEWDK(bi)R_;_NFM(ox)ESVPEPRPSEWDK(bi)R_;_NFM(ox)ESVPEPRPSEWDK(bi)R_;_NFM(ox)ESVPEPRPSEWDK(bi)R_;_NFM(ox)ESVPEPRPSEWDK(bi)R_;_NFMESVPEPRPSEWDK(bi)R_;_NFMESVPEPRPSEWDK(bi)R_;_NFMESVPEPRPSEWDK(bi)R_;_NFMESVPEPRPSEWDK(bi)R_;_NFMESVPEPRPSEWDK(bi)R_;_NFMESVPEPRPSEWDK(bi)R_;_NFMESVPEPRPSEWDK(bi)R_;_NFMESVPEPRPSEWDK(bi)R_;_NFMESVPEPRPSEWDK(bi)R_;_NFMESVPEPRPSEW…	706	NA	0.0929973	0.506783	0.379294	0.485395	0.0930631	0.146122	24.4033	24.5108	24.1676	24.8903	24.8687	24.4605	22.8795	23.1809	22.9417	22.8154	23.2818	23.3432
P11171	Homo sapiens (Human)	Protein 4.1 (P4.1) (4.1R) (Band 4.1) (EPB4.1) (Erythrocyte membrane protein band 4.1)	EPB41 E41P	Biotin (K);Oxidation (M)	0	1	2	NFMESVPEPRPSEWDKR	_NFM(ox)ESVPEPRPSEWDK(bi)R_;_NFM(ox)ESVPEPRPSEWDK(bi)R_;_NFM(ox)ESVPEPRPSEWDK(bi)R_;_NFM(ox)ESVPEPRPSEWDK(bi)R_;_NFM(ox)ESVPEPRPSEWDK(bi)R_;_NFM(ox)ESVPEPRPSEWDK(bi)R_;_NFMESVPEPRPSEWDK(bi)R_;_NFMESVPEPRPSEWDK(bi)R_;_NFMESVPEPRPSEWDK(bi)R_;_NFMESVPEPRPSEWDK(bi)R_;_NFMESVPEPRPSEWDK(bi)R_;_NFMESVPEPRPSEWDK(bi)R_;_NFMESVPEPRPSEWDK(bi)R_;_NFMESVPEPRPSEWDK(bi)R_;_NFMESVPEPRPSEWDK(bi)R_;_NFMESVPEPRPSEW…	706	NA	0.293117	0.24623	0.476821	NA	NA	NA	22.1106	22.6411	23.236	23.1165	23.5369	22.7649	NA	NA	NA	NA	NA	NA
P11171	Homo sapiens (Human)	Protein 4.1 (P4.1) (4.1R) (Band 4.1) (EPB4.1) (Erythrocyte membrane protein band 4.1)	EPB41 E41P	Biotin (K)	0	1	1	SEIPTKDVPIVHTETK	_SEIPTK(bi)DVPIVHTETK_;_SEIPTK(bi)DVPIVHTETK_;_SEIPTK(bi)DVPIVHTETK_;_SEIPTK(bi)DVPIVHTETK_;_SEIPTK(bi)DVPIVHTETK_;_SEIPTK(bi)DVPIVHTETK_;_SEIPTK(bi)DVPIVHTETK_;_SEIPTK(bi)DVPIVHTETK_;_SEIPTK(bi)DVPIVHTETK_;_SEIPTK(bi)DVPIVHTETK_;_SEIPTK(bi)DVPIVHTETK_;_SEIPTK(bi)DVPIVHTETK_;_SEIPTK(bi)DVPIVHTETK_;_SEIPTK(bi)DVPIVHTETK_;_SEIPTK(bi)DVPIVHTETK_;_SEIPTK(bi)DVPIVHTETK_;_SEIPTK(bi)DVPIVHTETK_;_SEIPTK(…	753	NA	0.0377434	0.685213	-0.117876	0.593545	0.0664682	0.101352	27.1248	27.1522	27.1328	26.9437	27.0626	27.0498	26.1488	26.1466	26.5699	26.5973	26.2742	26.2978
P11171	Homo sapiens (Human)	Protein 4.1 (P4.1) (4.1R) (Band 4.1) (EPB4.1) (Erythrocyte membrane protein band 4.1)	EPB41 E41P	Biotin (K)	0	1	1	SKFLALGSK	_SK(bi)FLALGSK_;_SK(bi)FLALGSK_;_SK(bi)FLALGSK_;_SK(bi)FLALGSK_;_SK(bi)FLALGSK_;_SK(bi)FLALGSK_;_SK(bi)FLALGSK_;_SK(bi)FLALGSK_;_SK(bi)FLALGSK_;_SK(bi)FLALGSK_;_SK(bi)FLALGSK_;_SK(bi)FLALGSK_;_SK(bi)FLALGSK_;_SK(bi)FLALGSK_;_SK(bi)FLALGSK_	499	NA	0.422783	0.16637	-0.196026	0.26894	0.159278	-0.199677	22.9861	22.7862	23.304	22.8348	22.5499	23.1036	22.1179	22.2723	22.4267	21.8208	22.2348	22.1624
P11171	Homo sapiens (Human)	Protein 4.1 (P4.1) (4.1R) (Band 4.1) (EPB4.1) (Erythrocyte membrane protein band 4.1)	EPB41 E41P	Biotin (K)	0	1	2	SKFLALGSKFR	_SKFLALGSK(bi)FR_;_SKFLALGSK(bi)FR_;_SKFLALGSK(bi)FR_;_SKFLALGSK(bi)FR_	506	NA	NA	NA	NA	NA	NA	NA	NA	NA	NA	NA	NA	NA	NA	NA	NA	NA	NA	NA
P11171	Homo sapiens (Human)	Protein 4.1 (P4.1) (4.1R) (Band 4.1) (EPB4.1) (Erythrocyte membrane protein band 4.1)	EPB41 E41P	Biotin (K)	0	1	3	SLDGAAAVDSADRSPRPTSAPAITQGQVAEGGVLDASAKK	_SLDGAAAVDSADRSPRPTSAPAITQGQVAEGGVLDASAK(bi)K_;_SLDGAAAVDSADRSPRPTSAPAITQGQVAEGGVLDASAK(bi)K_;_SLDGAAAVDSADRSPRPTSAPAITQGQVAEGGVLDASAK(bi)K_;_SLDGAAAVDSADRSPRPTSAPAITQGQVAEGGVLDASAK(bi)K_;_SLDGAAAVDSADRSPRPTSAPAITQGQVAEGGVLDASAK(bi)K_;_SLDGAAAVDSADRSPRPTSAPAITQGQVAEGGVLDASAK(bi)K_;_SLDGAAAVDSADRSPRPTSAPAITQGQVAEGGVLDASAK(bi)K_;_SLDGAAAVDSADRSPRPTSAPAITQGQVAEGGVLDASAK(bi)K_;_SLDGAAAVDSADRSPRPTSAPA…	580	NA	0.222771	0.30927	0.237458	NA	NA	NA	25.7459	25.9119	26.0912	26.1567	26.3793	25.9253	NA	NA	NA	NA	NA	NA
P11171	Homo sapiens (Human)	Protein 4.1 (P4.1) (4.1R) (Band 4.1) (EPB4.1) (Erythrocyte membrane protein band 4.1)	EPB41 E41P	Biotin (K)	0	1	2	SPRPTSAPAITQGQVAEGGVLDASAKK	_SPRPTSAPAITQGQVAEGGVLDASAK(bi)K_;_SPRPTSAPAITQGQVAEGGVLDASAK(bi)K_;_SPRPTSAPAITQGQVAEGGVLDASAK(bi)K_;_SPRPTSAPAITQGQVAEGGVLDASAK(bi)K_;_SPRPTSAPAITQGQVAEGGVLDASAK(bi)K_	580	NA	NA	NA	NA	NA	NA	NA	NA	NA	NA	NA	NA	NA	NA	NA	NA	NA	NA	NA
P11171	Homo sapiens (Human)	Protein 4.1 (P4.1) (4.1R) (Band 4.1) (EPB4.1) (Erythrocyte membrane protein band 4.1)	EPB41 E41P	Biotin (K)	0	1	1	TQTVTISDNANAVKSEIPTK	_TQTVTISDNANAVK(bi)SEIPTK_;_TQTVTISDNANAVKSEIPTK(bi)_	747;753	NA	NA	NA	NA	NA	NA	NA	NA	NA	NA	NA	NA	NA	NA	NA	NA	NA	NA	NA
P11171	Homo sapiens (Human)	Protein 4.1 (P4.1) (4.1R) (Band 4.1) (EPB4.1) (Erythrocyte membrane protein band 4.1)	EPB41 E41P	Biotin (K)	0	1	2	TQTVTISDNANAVKSEIPTKDVPIVHTETK	_TQTVTISDNANAVK(bi)SEIPTKDVPIVHTETK_;_TQTVTISDNANAVKSEIPTK(bi)DVPIVHTETK_;_TQTVTISDNANAVKSEIPTK(bi)DVPIVHTETK_;_TQTVTISDNANAVK(bi)SEIPTKDVPIVHTETK_;_TQTVTISDNANAVK(bi)SEIPTKDVPIVHTETK_;_TQTVTISDNANAVKSEIPTK(bi)DVPIVHTETK_;_TQTVTISDNANAVKSEIPTK(bi)DVPIVHTETK_;_TQTVTISDNANAVKSEIPTK(bi)DVPIVHTETK_;_TQTVTISDNANAVK(bi)SEIPTKDVPIVHTETK_;_TQTVTISDNANAVKSEIPTK(bi)DVPIVHTETK_;_TQTVTISDNANAVKSEIPTK(bi)DVPI…	747;753	NA	0.2145	0.314513	1.11059	0.0992086	0.315922	-1.60064	26.4396	26.7568	24.4095	27.0078	27.2487	26.6811	22.5622	24.8301	24.504	21.9147	22.4332	22.7466
P11171	Homo sapiens (Human)	Protein 4.1 (P4.1) (4.1R) (Band 4.1) (EPB4.1) (Erythrocyte membrane protein band 4.1)	EPB41 E41P	Biotin (K)	0	1	1	TVKGGISETR	_TVK(bi)GGISETR_;_TVK(bi)GGISETR_;_TVK(bi)GGISETR_;_TVK(bi)GGISETR_;_TVK(bi)GGISETR_;_TVK(bi)GGISETR_;_TVK(bi)GGISETR_;_TVK(bi)GGISETR_;_TVK(bi)GGISETR_;_TVK(bi)GGISETR_;_TVK(bi)GGISETR_;_TVK(bi)GGISETR_;_TVK(bi)GGISETR_;_TVK(bi)GGISETR_;_TVK(bi)GGISETR_;_TVK(bi)GGISETR_;_TVK(bi)GGISETR_;_TVK(bi)GGISETR_;_TVK(bi)GGISETR_;_TVK(bi)GGISETR_;_TVK(bi)GGISETR_;_TVK(bi)GGISETR_;_TVK(bi)GGISETR_;_TVK(bi)…	808	NA	0.0111104	0.946719	0.269078	0.817281	0.02644	-0.0404181	25.8931	26.0263	25.9585	26.2656	26.2833	26.1362	24.7984	25.253	25.2544	24.956	25.1697	25.0589
P11171	Homo sapiens (Human)	Protein 4.1 (P4.1) (4.1R) (Band 4.1) (EPB4.1) (Erythrocyte membrane protein band 4.1)	EPB41 E41P	Biotin (K)	0	1	2	TVKGGISETRIEK	_TVK(bi)GGISETRIEK_;_TVK(bi)GGISETRIEK_;_TVK(bi)GGISETRIEK_;_TVK(bi)GGISETRIEK_;_TVK(bi)GGISETRIEK_;_TVK(bi)GGISETRIEK_;_TVK(bi)GGISETRIEK_;_TVK(bi)GGISETRIEK_;_TVK(bi)GGISETRIEK_	808	NA	0.101422	0.49571	0.753994	NA	NA	NA	22.2279	22.3877	22.3101	23.4291	23.4013	22.3572	NA	NA	NA	NA	NA	NA
P11171	Homo sapiens (Human)	Protein 4.1 (P4.1) (4.1R) (Band 4.1) (EPB4.1) (Erythrocyte membrane protein band 4.1)	EPB41 E41P	Biotin (K)	0	1	3	TVKGGISETRIEKR	_TVKGGISETRIEK(bi)R_;_TVKGGISETRIEK(bi)R_;_TVKGGISETRIEK(bi)R_;_TVKGGISETRIEK(bi)R_;_TVKGGISETRIEK(bi)R_;_TVKGGISETRIEK(bi)R_;_TVKGGISETRIEK(bi)R_;_TVKGGISETRIEK(bi)R_;_TVKGGISETRIEK(bi)R_;_TVKGGISETRIEK(bi)R_;_TVKGGISETRIEK(bi)R_;_TVKGGISETRIEK(bi)R_;_TVK(bi)GGISETRIEK(bi)R_;_TVK(bi)GGISETRIEK(bi)R_;_TVK(bi)GGISETRIEK(bi)R_;_TVK(bi)GGISETRIEK(bi)R_;_TVK(bi)GGISETRIEK(bi)R_;_TVK(bi)GGISETRIEK(bi)…	818;808	NA	0.0317504	0.721959	1.28826	NA	NA	NA	25.3816	25.4053	26.0137	27.1916	27.2638	26.2099	NA	NA	NA	NA	NA	NA
P11171	Homo sapiens (Human)	Protein 4.1 (P4.1) (4.1R) (Band 4.1) (EPB4.1) (Erythrocyte membrane protein band 4.1)	EPB41 E41P	2 Biotin (K)	0	2	3	TVKGGISETRIEKR	_TVKGGISETRIEK(bi)R_;_TVKGGISETRIEK(bi)R_;_TVKGGISETRIEK(bi)R_;_TVKGGISETRIEK(bi)R_;_TVKGGISETRIEK(bi)R_;_TVKGGISETRIEK(bi)R_;_TVKGGISETRIEK(bi)R_;_TVKGGISETRIEK(bi)R_;_TVKGGISETRIEK(bi)R_;_TVKGGISETRIEK(bi)R_;_TVKGGISETRIEK(bi)R_;_TVKGGISETRIEK(bi)R_;_TVK(bi)GGISETRIEK(bi)R_;_TVK(bi)GGISETRIEK(bi)R_;_TVK(bi)GGISETRIEK(bi)R_;_TVK(bi)GGISETRIEK(bi)R_;_TVK(bi)GGISETRIEK(bi)R_;_TVK(bi)GGISETRIEK(bi)…	818;808	NA	0.0230688	0.774253	1.04942	NA	NA	NA	22.6798	22.6552	22.9734	24.1339	24.0504	23.2724	NA	NA	NA	NA	NA	NA
P11171	Homo sapiens (Human)	Protein 4.1 (P4.1) (4.1R) (Band 4.1) (EPB4.1) (Erythrocyte membrane protein band 4.1)	EPB41 E41P	Biotin (K)	0	1	1	TVVPKAQK	_TVVPKAQK(bi)_;_TVVPKAQK(bi)_;_TVVPKAQK(bi)_;_TVVPKAQK(bi)_;_TVVPKAQK(bi)_	589	NA	NA	NA	NA	0.0626117	0.422129	-0.133492	NA	NA	NA	NA	NA	NA	19.6085	19.5463	19.6707	19.4242	19.5489	19.452
P11277	Homo sapiens (Human)	Spectrin beta chain, erythrocytic (Beta-I spectrin)	SPTB SPTB1	Biotin (K)	0	1	1	FAALEKPTTLELK	_FAALEK(bi)PTTLELK_;_FAALEK(bi)PTTLELK_;_FAALEK(bi)PTTLELK_;_FAALEK(bi)PTTLELK_;_FAALEK(bi)PTTLELK_;_FAALEK(bi)PTTLELK_;_FAALEK(bi)PTTLELK_;_FAALEK(bi)PTTLELK_;_FAALEK(bi)PTTLELK_;_FAALEK(bi)PTTLELK_;_FAALEK(bi)PTTLELK_;_FAALEK(bi)PTTLELK_;_FAALEK(bi)PTTLELK_	2070	NA	0.0897089	0.514506	-0.627708	0.473983	0.0971098	0.191269	22.0061	22.4231	21.589	21.3493	21.6445	21.1412	22.5409	21.8279	22.2947	22.1866	22.607	22.4436
P11277	Homo sapiens (Human)	Spectrin beta chain, erythrocytic (Beta-I spectrin)	SPTB SPTB1	2 Biotin (K)	0	2	2	FAALEKPTTLELKER	_FAALEKPTTLELK(bi)ER_;_FAALEK(bi)PTTLELKER_;_FAALEKPTTLELK(bi)ER_;_FAALEK(bi)PTTLELKER_;_FAALEKPTTLELK(bi)ER_;_FAALEKPTTLELK(bi)ER_;_FAALEKPTTLELK(bi)ER_;_FAALEKPTTLELK(bi)ER_;_FAALEKPTTLELK(bi)ER_;_FAALEKPTTLELK(bi)ER_;_FAALEKPTTLELK(bi)ER_;_FAALEKPTTLELK(bi)ER_;_FAALEKPTTLELK(bi)ER_;_FAALEKPTTLELK(bi)ER_;_FAALEK(bi)PTTLELK(bi)ER_;_FAALEK(bi)PTTLELK(bi)ER_	2077;2070	NA	NA	NA	NA	NA	NA	NA	NA	NA	NA	NA	NA	NA	NA	NA	NA	NA	NA	NA
P11277	Homo sapiens (Human)	Spectrin beta chain, erythrocytic (Beta-I spectrin)	SPTB SPTB1	Biotin (K)	0	1	2	FAALEKPTTLELKER	_FAALEKPTTLELK(bi)ER_;_FAALEK(bi)PTTLELKER_;_FAALEKPTTLELK(bi)ER_;_FAALEK(bi)PTTLELKER_;_FAALEKPTTLELK(bi)ER_;_FAALEKPTTLELK(bi)ER_;_FAALEKPTTLELK(bi)ER_;_FAALEKPTTLELK(bi)ER_;_FAALEKPTTLELK(bi)ER_;_FAALEKPTTLELK(bi)ER_;_FAALEKPTTLELK(bi)ER_;_FAALEKPTTLELK(bi)ER_;_FAALEKPTTLELK(bi)ER_;_FAALEKPTTLELK(bi)ER_;_FAALEK(bi)PTTLELK(bi)ER_;_FAALEK(bi)PTTLELK(bi)ER_	2077;2070	NA	0.38516	0.181817	-0.493929	0.0359555	0.528327	-0.292693	23.7362	22.2856	22.3233	22.5483	22.3492	21.9657	21.8924	22.022	22.1517	21.6395	21.7131	21.8354
P11277	Homo sapiens (Human)	Spectrin beta chain, erythrocytic (Beta-I spectrin)	SPTB SPTB1	Biotin (K)	0	1	1	FTEGKGYQPCDPQVIQDR	_FTEGK(bi)GYQPCDPQVIQDR_;_FTEGK(bi)GYQPCDPQVIQDR_;_FTEGK(bi)GYQPCDPQVIQDR_;_FTEGK(bi)GYQPCDPQVIQDR_;_FTEGK(bi)GYQPCDPQVIQDR_;_FTEGK(bi)GYQPCDPQVIQDR_;_FTEGK(bi)GYQPCDPQVIQDR_;_FTEGK(bi)GYQPCDPQVIQDR_;_FTEGK(bi)GYQPCDPQVIQDR_;_FTEGK(bi)GYQPCDPQVIQDR_	598	NA	0.97294	0.00590826	-0.0148822	NA	NA	NA	22.058	21.3777	22.7007	22.1285	22.237	21.7262	NA	NA	NA	NA	NA	NA
P11277	Homo sapiens (Human)	Spectrin beta chain, erythrocytic (Beta-I spectrin)	SPTB SPTB1	Biotin (K)	0	1	1	HEAFEKSTASWAER	_HEAFEK(bi)STASWAER_;_HEAFEK(bi)STASWAER_;_HEAFEK(bi)STASWAER_;_HEAFEK(bi)STASWAER_;_HEAFEK(bi)STASWAER_;_HEAFEK(bi)STASWAER_;_HEAFEK(bi)STASWAER_;_HEAFEK(bi)STASWAER_;_HEAFEK(bi)STASWAER_;_HEAFEK(bi)STASWAER_	2056	NA	0.928197	0.0171865	-0.0567686	0.960823	0.0109965	0.0117729	23.7935	24.402	25.4524	25.0812	23.9038	24.4925	23.9737	24.2878	24.1307	24.0731	23.8252	24.5292
P11277	Homo sapiens (Human)	Spectrin beta chain, erythrocytic (Beta-I spectrin)	SPTB SPTB1	Biotin (K)	0	1	1	KQFGHPQIEAR	_K(bi)QFGHPQIEAR_;_K(bi)QFGHPQIEAR_;_K(bi)QFGHPQIEAR_;_K(bi)QFGHPQIEAR_;_K(bi)QFGHPQIEAR_;_K(bi)QFGHPQIEAR_;_K(bi)QFGHPQIEAR_;_K(bi)QFGHPQIEAR_;_K(bi)QFGHPQIEAR_;_K(bi)QFGHPQIEAR_;_K(bi)QFGHPQIEAR_;_K(bi)QFGHPQIEAR_;_K(bi)QFGHPQIEAR_;_K(bi)QFGHPQIEAR_;_K(bi)QFGHPQIEAR_;_K(bi)QFGHPQIEAR_;_K(bi)QFGHPQIEAR_	707	NA	0.184225	0.34755	0.487038	0.188915	0.198254	0.525479	22.8452	22.7085	22.3487	23.6462	22.7917	22.9256	21.8037	21.8082	20.8435	22.1171	22.0752	21.8395
P11277	Homo sapiens (Human)	Spectrin beta chain, erythrocytic (Beta-I spectrin)	SPTB SPTB1	Biotin (K)	0	1	2	RHEAFEKSTASWAER	_RHEAFEK(bi)STASWAER_;_RHEAFEK(bi)STASWAER_;_RHEAFEK(bi)STASWAER_;_RHEAFEK(bi)STASWAER_;_RHEAFEK(bi)STASWAER_;_RHEAFEK(bi)STASWAER_;_RHEAFEK(bi)STASWAER_;_RHEAFEK(bi)STASWAER_;_RHEAFEK(bi)STASWAER_;_RHEAFEK(bi)STASWAER_;_RHEAFEK(bi)STASWAER_;_RHEAFEK(bi)STASWAER_;_RHEAFEK(bi)STASWAER_;_RHEAFEK(bi)STASWAER_;_RHEAFEK(bi)STASWAER_;_RHEAFEK(bi)STASWAER_;_RHEAFEK(bi)STASWAER_;_RHEAFEK(bi)STASWAER_;_RH…	2056	NA	0.0361055	0.688744	0.401441	0.850131	0.0189715	-0.0293614	24.0736	24.1873	23.9182	24.6662	24.3793	24.338	24.866	24.7199	25.1592	25.0097	24.7777	24.8697
P11277	Homo sapiens (Human)	Spectrin beta chain, erythrocytic (Beta-I spectrin)	SPTB SPTB1	Biotin (K)	0	1	1	VYTPHDGKLVSDINR	_VYTPHDGK(bi)LVSDINR_;_VYTPHDGK(bi)LVSDINR_;_VYTPHDGK(bi)LVSDINR_	387	NA	NA	NA	NA	NA	NA	NA	NA	NA	NA	NA	NA	NA	NA	NA	NA	NA	NA	NA
P11908	Homo sapiens (Human)	Ribose-phosphate pyrophosphokinase 2 (EC 2.7.6.1) (PPRibP) (Phosphoribosyl pyrophosphate synthase II) (PRS-II)	PRPS2	Biotin (K)	0	1	2	MKHCTKIQVIDISMILAEAIR	_MK(bi)HCTKIQVIDISMILAEAIR_;_MK(bi)HCTKIQVIDISMILAEAIR_;_MK(bi)HCTKIQVIDISMILAEAIR_	282	NA	NA	NA	NA	NA	NA	NA	NA	NA	NA	NA	NA	NA	NA	NA	NA	NA	NA	NA
P15170	Homo sapiens (Human)	Eukaryotic peptide chain release factor GTP-binding subunit ERF3A (Eukaryotic peptide chain release factor subunit 3a) (eRF3a) (G1 to S phase transition protein 1 homolog)	GSPT1 ERF3A	Biotin (K)	0	1	1	HFTILDAPGHKSFVPNMIGGASQADLAVLVISAR	_HFTILDAPGHK(bi)SFVPNMIGGASQADLAVLVISAR_;_HFTILDAPGHK(bi)SFVPNMIGGASQADLAVLVISAR_;_HFTILDAPGHK(bi)SFVPNMIGGASQADLAVLVISAR_	163	NA	NA	NA	NA	NA	NA	NA	NA	NA	NA	NA	NA	NA	NA	NA	NA	NA	NA	NA
P16157	Homo sapiens (Human)	Ankyrin-1 (ANK-1) (Ankyrin-R) (Erythrocyte ankyrin)	ANK1 ANK	Biotin (K)	0	1	2	DSRDVDEEKELLDFVPK	_DSRDVDEEK(bi)ELLDFVPK_;_DSRDVDEEK(bi)ELLDFVPK_;_DSRDVDEEK(bi)ELLDFVPK_;_DSRDVDEEK(bi)ELLDFVPK_;_DSRDVDEEK(bi)ELLDFVPK_;_DSRDVDEEK(bi)ELLDFVPK_;_DSRDVDEEK(bi)ELLDFVPK_;_DSRDVDEEK(bi)ELLDFVPK_;_DSRDVDEEK(bi)ELLDFVPK_;_DSRDVDEEK(bi)ELLDFVPK_;_DSRDVDEEK(bi)ELLDFVPK_;_DSRDVDEEK(bi)ELLDFVPK_;_DSRDVDEEK(bi)ELLDFVPK_;_DSRDVDEEK(bi)ELLDFVPK_;_DSRDVDEEK(bi)ELLDFVPK_;_DSRDVDEEK(bi)ELLDFVPK_	841	NA	0.994944	0.00108652	0.00346556	0.282428	0.155148	0.531479	22.2327	23.6404	22.1282	22.6706	22.3882	22.9529	21.4489	22.5234	21.6961	22.0321	22.9621	22.2686
P16157	Homo sapiens (Human)	Ankyrin-1 (ANK-1) (Ankyrin-R) (Erythrocyte ankyrin)	ANK1 ANK	Biotin (K)	0	1	3	DSRDVDEEKELLDFVPKLDQVVESPAIPR	_DSRDVDEEK(bi)ELLDFVPKLDQVVESPAIPR_;_DSRDVDEEK(bi)ELLDFVPKLDQVVESPAIPR_;_DSRDVDEEK(bi)ELLDFVPKLDQVVESPAIPR_;_DSRDVDEEK(bi)ELLDFVPKLDQVVESPAIPR_;_DSRDVDEEK(bi)ELLDFVPKLDQVVESPAIPR_;_DSRDVDEEK(bi)ELLDFVPKLDQVVESPAIPR_;_DSRDVDEEKELLDFVPK(bi)LDQVVESPAIPR_;_DSRDVDEEK(bi)ELLDFVPKLDQVVESPAIPR_	841;849	NA	0.152428	0.393602	0.924484	NA	NA	NA	24.4751	24.7279	23.1402	25.2525	25.1803	24.6839	NA	NA	NA	NA	NA	NA
P16157	Homo sapiens (Human)	Ankyrin-1 (ANK-1) (Ankyrin-R) (Erythrocyte ankyrin)	ANK1 ANK	Biotin (K)	0	1	1	DVDEEKELLDFVPK	_DVDEEK(bi)ELLDFVPK_;_DVDEEK(bi)ELLDFVPK_;_DVDEEK(bi)ELLDFVPK_;_DVDEEK(bi)ELLDFVPK_;_DVDEEK(bi)ELLDFVPK_	841	NA	NA	NA	NA	0.0904086	0.338815	0.304086	NA	NA	NA	NA	NA	NA	22.2452	21.8814	22.2478	22.5372	22.4289	22.3205
P16157	Homo sapiens (Human)	Ankyrin-1 (ANK-1) (Ankyrin-R) (Erythrocyte ankyrin)	ANK1 ANK	Biotin (K)	0	1	2	DVDEEKELLDFVPKLDQVVESPAIPR	_DVDEEK(bi)ELLDFVPKLDQVVESPAIPR_;_DVDEEK(bi)ELLDFVPKLDQVVESPAIPR_	841	NA	NA	NA	NA	NA	NA	NA	NA	NA	NA	NA	NA	NA	NA	NA	NA	NA	NA	NA
P16157	Homo sapiens (Human)	Ankyrin-1 (ANK-1) (Ankyrin-R) (Erythrocyte ankyrin)	ANK1 ANK	Biotin (K)	0	1	1	HSKDHTSTPNP	_HSK(bi)DHTSTPNP_;_HSK(bi)DHTSTPNP_;_HSK(bi)DHTSTPNP_;_HSK(bi)DHTSTPNP_;_HSK(bi)DHTSTPNP_;_HSK(bi)DHTSTPNP_;_HSK(bi)DHTSTPNP_;_HSK(bi)DHTSTPNP_;_HSK(bi)DHTSTPNP_;_HSK(bi)DHTSTPNP_;_HSK(bi)DHTSTPNP_;_HSK(bi)DHTSTPNP_;_HSK(bi)DHTSTPNP_;_HSK(bi)DHTSTPNP_;_HSK(bi)DHTSTPNP_;_HSK(bi)DHTSTPNP_;_HSK(bi)DHTSTPNP_;_HSK(bi)DHTSTPNP_;_HSK(bi)DHTSTPNP_;_HSK(bi)DHTSTPNP_;_HSK(bi)DHTSTPNP_;_HSK(bi)DHTSTPNP_;_HS…	1873	NA	0.132387	0.433495	0.213544	0.758261	0.0411005	0.0940719	23.014	22.8807	23.1683	23.1396	23.1771	23.3869	21.7985	22.4999	22.3957	22.3364	22.002	22.6379
P16157	Homo sapiens (Human)	Ankyrin-1 (ANK-1) (Ankyrin-R) (Erythrocyte ankyrin)	ANK1 ANK	Biotin (K)	0	1	1	LAMPVKVR	_LAMPVK(bi)VR_;_LAMPVK(bi)VR_;_LAMPVK(bi)VR_;_LAMPVK(bi)VR_;_LAMPVK(bi)VR_;_LAMPVK(bi)VR_;_LAMPVK(bi)VR_;_LAMPVK(bi)VR_	1328	NA	NA	NA	NA	0.0935635	0.334351	0.627342	NA	NA	NA	NA	NA	NA	20.6927	20.8617	21.4774	21.3821	21.6038	21.9279
P16157	Homo sapiens (Human)	Ankyrin-1 (ANK-1) (Ankyrin-R) (Erythrocyte ankyrin)	ANK1 ANK	Biotin (K)	0	1	1	LVKPQK	_LVK(bi)PQK_;_LVK(bi)PQK_;_LVK(bi)PQK_;_LVK(bi)PQK_	955	NA	0.504591	0.132448	-0.0350008	NA	NA	NA	18.7363	18.6357	18.686	18.651	18.5853	18.7168	NA	NA	NA	NA	NA	NA
P16157	Homo sapiens (Human)	Ankyrin-1 (ANK-1) (Ankyrin-R) (Erythrocyte ankyrin)	ANK1 ANK	Biotin (K)	0	1	2	LVKPQKLSTPPPLAEEEGLASR	_LVK(bi)PQKLSTPPPLAEEEGLASR_;_LVK(bi)PQKLSTPPPLAEEEGLASR_;_LVK(bi)PQKLSTPPPLAEEEGLASR_;_LVK(bi)PQKLSTPPPLAEEEGLASR_;_LVK(bi)PQKLSTPPPLAEEEGLASR_;_LVK(bi)PQKLSTPPPLAEEEGLASR_;_LVK(bi)PQKLSTPPPLAEEEGLASR_;_LVKPQK(bi)LSTPPPLAEEEGLASR_	955;958	NA	0.0563922	0.605701	-0.414639	NA	NA	NA	23.3971	22.9962	22.8921	22.7015	22.6315	22.7085	NA	NA	NA	NA	NA	NA
P16157	Homo sapiens (Human)	Ankyrin-1 (ANK-1) (Ankyrin-R) (Erythrocyte ankyrin)	ANK1 ANK	Biotin (K)	0	1	1	NTFTQVVQGNEFQNIPGEQVTEEQFTDEQGNIVTKK	_NTFTQVVQGNEFQNIPGEQVTEEQFTDEQGNIVTKK(bi)_;_NTFTQVVQGNEFQNIPGEQVTEEQFTDEQGNIVTK(bi)K_;_NTFTQVVQGNEFQNIPGEQVTEEQFTDEQGNIVTKK(bi)_;_NTFTQVVQGNEFQNIPGEQVTEEQFTDEQGNIVTK(bi)K_;_NTFTQVVQGNEFQNIPGEQVTEEQFTDEQGNIVTKK(bi)_;_NTFTQVVQGNEFQNIPGEQVTEEQFTDEQGNIVTK(bi)K_;_NTFTQVVQGNEFQNIPGEQVTEEQFTDEQGNIVTKK(bi)_;_NTFTQVVQGNEFQNIPGEQVTEEQFTDEQGNIVTK(bi)K_;_NTFTQVVQGNEFQNIPGEQVTEEQFTDEQGNIVTK(bi)K_;_NTFTQVVQGNE…	1826;1825	NA	NA	NA	NA	0.60219	0.0661279	-0.200332	NA	NA	NA	NA	NA	NA	22.6833	22.7561	22.6105	21.8198	22.61	23.0191
P16157	Homo sapiens (Human)	Ankyrin-1 (ANK-1) (Ankyrin-R) (Erythrocyte ankyrin)	ANK1 ANK	Biotin (K)	0	1	3	RDSRDVDEEKELLDFVPK	_RDSRDVDEEK(bi)ELLDFVPK_;_RDSRDVDEEK(bi)ELLDFVPK_;_RDSRDVDEEK(bi)ELLDFVPK_;_RDSRDVDEEK(bi)ELLDFVPK_;_RDSRDVDEEK(bi)ELLDFVPK_;_RDSRDVDEEK(bi)ELLDFVPK_;_RDSRDVDEEK(bi)ELLDFVPK_;_RDSRDVDEEK(bi)ELLDFVPK_;_RDSRDVDEEK(bi)ELLDFVPK_;_RDSRDVDEEK(bi)ELLDFVPK_;_RDSRDVDEEK(bi)ELLDFVPK_;_RDSRDVDEEK(bi)ELLDFVPK_;_RDS(ph)RDVDEEK(bi)ELLDFVPK_;_RDS(ph)RDVDEEK(bi)ELLDFVPK_	841	NA	0.062296	0.586202	-1.20378	NA	NA	NA	22.8544	23.2986	22.4102	20.9724	22.3338	21.6457	NA	NA	NA	NA	NA	NA
P16157	Homo sapiens (Human)	Ankyrin-1 (ANK-1) (Ankyrin-R) (Erythrocyte ankyrin)	ANK1 ANK	Biotin (K);Phospho (STY)	1	1	3	RDSRDVDEEKELLDFVPK	_RDSRDVDEEK(bi)ELLDFVPK_;_RDSRDVDEEK(bi)ELLDFVPK_;_RDSRDVDEEK(bi)ELLDFVPK_;_RDSRDVDEEK(bi)ELLDFVPK_;_RDSRDVDEEK(bi)ELLDFVPK_;_RDSRDVDEEK(bi)ELLDFVPK_;_RDSRDVDEEK(bi)ELLDFVPK_;_RDSRDVDEEK(bi)ELLDFVPK_;_RDSRDVDEEK(bi)ELLDFVPK_;_RDSRDVDEEK(bi)ELLDFVPK_;_RDSRDVDEEK(bi)ELLDFVPK_;_RDSRDVDEEK(bi)ELLDFVPK_;_RDS(ph)RDVDEEK(bi)ELLDFVPK_;_RDS(ph)RDVDEEK(bi)ELLDFVPK_	841	834	NA	NA	NA	NA	NA	NA	NA	NA	NA	NA	NA	NA	NA	NA	NA	NA	NA	NA
P16157	Homo sapiens (Human)	Ankyrin-1 (ANK-1) (Ankyrin-R) (Erythrocyte ankyrin)	ANK1 ANK	Biotin (K)	0	1	2	SKLVPLVQATFPENAVTKR	_SK(bi)LVPLVQATFPENAVTKR_;_SK(bi)LVPLVQATFPENAVTKR_;_SK(bi)LVPLVQATFPENAVTKR_;_SK(bi)LVPLVQATFPENAVTKR_;_SK(bi)LVPLVQATFPENAVTKR_;_SK(bi)LVPLVQATFPENAVTKR_;_SK(bi)LVPLVQATFPENAVTKR_;_SK(bi)LVPLVQATFPENAVTKR_;_SK(bi)LVPLVQATFPENAVTKR_;_SK(bi)LVPLVQATFPENAVTKR_;_SK(bi)LVPLVQATFPENAVTKR_;_SK(bi)LVPLVQATFPENAVTKR_;_SK(bi)LVPLVQATFPENAVTKR_;_SK(bi)LVPLVQATFPENAVTKR_;_SK(bi)LVPLVQATFPENAVTKR_	1086	NA	0.85153	0.0321309	-0.0547756	0.000901432	1.0979	0.670029	22.4523	23.175	22.2922	22.5563	22.5356	22.6633	21.5643	21.6519	21.6169	22.1869	22.2353	22.421
P16157	Homo sapiens (Human)	Ankyrin-1 (ANK-1) (Ankyrin-R) (Erythrocyte ankyrin)	ANK1 ANK	Biotin (K)	0	1	1	VVTDETSFVLVSDKHR	_VVTDETSFVLVSDK(bi)HR_;_VVTDETSFVLVSDK(bi)HR_;_VVTDETSFVLVSDK(bi)HR_;_VVTDETSFVLVSDK(bi)HR_;_VVTDETSFVLVSDK(bi)HR_;_VVTDETSFVLVSDK(bi)HR_;_VVTDETSFVLVSDK(bi)HR_;_VVTDETSFVLVSDK(bi)HR_;_VVTDETSFVLVSDK(bi)HR_;_VVTDETSFVLVSDK(bi)HR_;_VVTDETSFVLVSDK(bi)HR_;_VVTDETSFVLVSDK(bi)HR_;_VVTDETSFVLVSDK(bi)HR_;_VVTDETSFVLVSDK(bi)HR_;_VVTDETSFVLVSDK(bi)HR_;_VVTDETSFVLVSDK(bi)HR_;_VVTDETSFVLVSDK(bi)HR_;_VVTDETS…	801	NA	0.093327	0.506492	0.222088	0.571869	0.0743459	0.115819	28.9779	28.9595	28.6971	29.0446	29.0669	29.1893	27.7386	28.0118	28.2644	27.938	28.3228	28.1015
P16989	Homo sapiens (Human)	Y-box-binding protein 3 (Cold shock domain-containing protein A) (DNA-binding protein A) (Single-strand DNA-binding protein NF-GMB)	YBX3 CSDA DBPA	Biotin (K)	0	1	1	VLATKVLGTVK	_VLATK(bi)VLGTVK_;_VLATK(bi)VLGTVK_;_VLATK(bi)VLGTVK_;_VLATK(bi)VLGTVK_;_VLATK(bi)VLGTVK_;_VLATK(bi)VLGTVK_;_VLATK(bi)VLGTVK_;_VLATK(bi)VLGTVK_;_VLATK(bi)VLGTVK_;_VLATK(bi)VLGTVK_;_VLATK(bi)VLGTVK_;_VLATK(bi)VLGTVK_;_VLATK(bi)VLGTVK_;_VLATK(bi)VLGTVK_	90	NA	0.5058	0.132448	-0.390086	0.968461	0.00898498	0.0131719	22.3229	23.5946	22.4505	21.9404	23.0849	22.1725	23.5743	24.0587	23.6933	23.2344	24.0725	24.0589
P16989	Homo sapiens (Human)	Y-box-binding protein 3 (Cold shock domain-containing protein A) (DNA-binding protein A) (Single-strand DNA-binding protein NF-GMB)	YBX3 CSDA DBPA	Biotin (K)	0	1	1	VLGTVKWFNVR	_VLGTVK(bi)WFNVR_;_VLGTVK(bi)WFNVR_;_VLGTVK(bi)WFNVR_;_VLGTVK(bi)WFNVR_;_VLGTVK(bi)WFNVR_;_VLGTVK(bi)WFNVR_;_VLGTVK(bi)WFNVR_;_VLGTVK(bi)WFNVR_;_VLGTVK(bi)WFNVR_;_VLGTVK(bi)WFNVR_;_VLGTVK(bi)WFNVR_;_VLGTVK(bi)WFNVR_	96	NA	0.801174	0.0419315	-0.137896	0.333669	0.143109	-0.363365	21.6348	22.7762	21.8365	21.4626	22.6781	21.6931	22.3979	23.052	22.4003	21.9367	22.7448	22.0786
P21980	Homo sapiens (Human)	Protein-glutamine gamma-glutamyltransferase 2 (EC 2.3.2.13) (Erythrocyte transglutaminase) (Heart G alpha(h)) (hhG alpha(h)) (Isopeptidase TGM2) (EC 3.4.-.-) (Protein G alpha(h)) (G(h)) (Protein-glutamine deamidase TGM2) (EC 3.5.1.44) (Protein-glutamine dopaminyltransferase TGM2) (EC 2.3.1.-) (Protein-glutamine histaminyltransferase TGM2) (EC 2.3.1.-) (Protein-glutamine noradrenalinyltransferase …	TGM2	Biotin (K)	0	1	2	ANHLNKLAEKEETGMAMR	_ANHLNK(bi)LAEKEETGM(ox)AMR_;_ANHLNK(bi)LAEKEETGMAM(ox)R_;_ANHLNK(bi)LAEKEETGM(ox)AMR_;_ANHLNK(bi)LAEKEETGMAM(ox)R_;_ANHLNK(bi)LAEKEETGM(ox)AMR_;_ANHLNK(bi)LAEKEETGMAM(ox)R_;_ANHLNK(bi)LAEKEETGM(ox)AMR_;_ANHLNK(bi)LAEKEETGM(ox)AMR_;_ANHLNK(bi)LAEKEETGM(ox)AMR_;_ANHLNK(bi)LAEKEETGMAM(ox)R_;_ANHLNK(bi)LAEKEETGM(ox)AMR_;_ANHLNK(bi)LAEKEETGMAM(ox)R_;_ANHLNK(bi)LAEKEETGM(ox)AMR_;_ANHLNK(bi)LAEKEETGMAM…	464	NA	0.795457	0.0433571	0.0751744	0.366571	0.131964	0.765695	24.2202	23.9166	23.3643	24.0752	23.9344	23.717	23.5989	21.9727	23.6452	23.7913	24.7506	22.972
P21980	Homo sapiens (Human)	Protein-glutamine gamma-glutamyltransferase 2 (EC 2.3.2.13) (Erythrocyte transglutaminase) (Heart G alpha(h)) (hhG alpha(h)) (Isopeptidase TGM2) (EC 3.4.-.-) (Protein G alpha(h)) (G(h)) (Protein-glutamine deamidase TGM2) (EC 3.5.1.44) (Protein-glutamine dopaminyltransferase TGM2) (EC 2.3.1.-) (Protein-glutamine histaminyltransferase TGM2) (EC 2.3.1.-) (Protein-glutamine noradrenalinyltransferase …	TGM2	Biotin (K);Oxidation (M)	0	1	2	ANHLNKLAEKEETGMAMR	_ANHLNK(bi)LAEKEETGM(ox)AMR_;_ANHLNK(bi)LAEKEETGMAM(ox)R_;_ANHLNK(bi)LAEKEETGM(ox)AMR_;_ANHLNK(bi)LAEKEETGMAM(ox)R_;_ANHLNK(bi)LAEKEETGM(ox)AMR_;_ANHLNK(bi)LAEKEETGMAM(ox)R_;_ANHLNK(bi)LAEKEETGM(ox)AMR_;_ANHLNK(bi)LAEKEETGM(ox)AMR_;_ANHLNK(bi)LAEKEETGM(ox)AMR_;_ANHLNK(bi)LAEKEETGMAM(ox)R_;_ANHLNK(bi)LAEKEETGM(ox)AMR_;_ANHLNK(bi)LAEKEETGMAM(ox)R_;_ANHLNK(bi)LAEKEETGM(ox)AMR_;_ANHLNK(bi)LAEKEETGMAM…	464	NA	0.980324	0.00413362	-0.0164256	0.0259868	0.569816	-0.551088	21.9253	22.0643	23.3009	23.0692	22.6151	21.5568	21.3429	21.3033	21.6533	21.109	20.7362	20.801
P23528	Homo sapiens (Human)	Cofilin-1 (18 kDa phosphoprotein) (p18) (Cofilin, non-muscle isoform)	CFL1 CFL	Biotin (K)	0	1	2	KSSTPEEVKK	_K(bi)SSTPEEVKK_	22	NA	NA	NA	NA	NA	NA	NA	NA	NA	NA	NA	NA	NA	NA	NA	NA	NA	NA	NA
P23588	Homo sapiens (Human)	Eukaryotic translation initiation factor 4B (eIF-4B)	EIF4B	Biotin (K)	0	1	1	AASIFGGAKPVDTAAR	_AASIFGGAK(bi)PVDTAAR_;_AASIFGGAK(bi)PVDTAAR_;_AASIFGGAK(bi)PVDTAAR_;_AASIFGGAK(bi)PVDTAAR_;_AASIFGGAK(bi)PVDTAAR_;_AASIFGGAK(bi)PVDTAAR_;_AASIFGGAK(bi)PVDTAAR_;_AASIFGGAK(bi)PVDTAAR_;_AASIFGGAK(bi)PVDTAAR_;_AASIFGGAK(bi)PVDTAAR_;_AASIFGGAK(bi)PVDTAAR_;_AASIFGGAK(bi)PVDTAAR_;_AASIFGGAK(bi)PVDTAAR_;_AASIFGGAK(bi)PVDTAAR_;_AASIFGGAK(bi)PVDTAAR_;_AASIFGGAK(bi)PVDTAAR_;_AASIFGGAK(bi)PVDTAAR_;_AASIFGG…	365	NA	0.0767751	0.546413	0.508684	0.554898	0.0747631	-0.369061	24.4033	24.1873	24.3298	24.4055	25.0152	25.0258	23.5989	24.0179	23.9224	24.1189	22.3631	23.9501
P23588	Homo sapiens (Human)	Eukaryotic translation initiation factor 4B (eIF-4B)	EIF4B	Biotin (K)	0	1	1	QLDEPKLER	_QLDEPK(bi)LER_;_QLDEPK(bi)LER_;_QLDEPK(bi)LER_;_QLDEPK(bi)LER_;_QLDEPK(bi)LER_	395	NA	0.116582	0.46364	0.39198	NA	NA	NA	20.85	20.4763	20.5962	21.3142	20.7513	21.0328	NA	NA	NA	NA	NA	NA
P23634	Homo sapiens (Human)	Plasma membrane calcium-transporting ATPase 4 (PMCA4) (EC 7.2.2.10) (Matrix-remodeling-associated protein 1) (Plasma membrane calcium ATPase isoform 4) (Plasma membrane calcium pump isoform 4)	ATP2B4 ATP2B2 MXRA1	Biotin (K)	0	1	1	TPLLDEEEEENPDKASK	_TPLLDEEEEENPDK(bi)ASK_;_TPLLDEEEEENPDK(bi)ASK_;_TPLLDEEEEENPDK(bi)ASK_;_TPLLDEEEEENPDK(bi)ASK_;_TPLLDEEEEENPDK(bi)ASK_;_TPLLDEEEEENPDK(bi)ASK_;_TPLLDEEEEENPDK(bi)ASK_	1194	NA	NA	NA	NA	NA	NA	NA	NA	NA	NA	NA	NA	NA	NA	NA	NA	NA	NA	NA
P23634	Homo sapiens (Human)	Plasma membrane calcium-transporting ATPase 4 (PMCA4) (EC 7.2.2.10) (Matrix-remodeling-associated protein 1) (Plasma membrane calcium ATPase isoform 4) (Plasma membrane calcium pump isoform 4)	ATP2B4 ATP2B2 MXRA1	Biotin (K)	0	1	2	TPLLDEEEEENPDKASKFGTR	_TPLLDEEEEENPDKASK(bi)FGTR_;_TPLLDEEEEENPDKASK(bi)FGTR_;_TPLLDEEEEENPDKASK(bi)FGTR_;_TPLLDEEEEENPDKASK(bi)FGTR_;_TPLLDEEEEENPDKASK(bi)FGTR_	1197	NA	NA	NA	NA	NA	NA	NA	NA	NA	NA	NA	NA	NA	NA	NA	NA	NA	NA	NA
P23763	Homo sapiens (Human)	Vesicle-associated membrane protein 1 (VAMP-1) (Synaptobrevin-1)	VAMP1 SYB1	Biotin (K)	0	1	1	VNVDKVLER	_VNVDK(bi)VLER_;_VNVDK(bi)VLER_;_VNVDK(bi)VLER_;_VNVDK(bi)VLER_;_VNVDK(bi)VLER_;_VNVDK(bi)VLER_	54	NA	0.768427	0.0447459	-0.112616	NA	NA	NA	20.9003	20.7074	21.4885	21.0276	20.4084	21.3224	NA	NA	NA	NA	NA	NA
P25786	Homo sapiens (Human)	Proteasome subunit alpha type-1 (30 kDa prosomal protein) (PROS-30) (Macropain subunit C2) (Multicatalytic endopeptidase complex subunit C2) (Proteasome component C2) (Proteasome nu chain)	PSMA1 HC2 NU PROS30 PSC2	Biotin (K)	0	1	1	LVSLIGSKTQIPTQR	_LVSLIGSK(bi)TQIPTQR_;_LVSLIGSK(bi)TQIPTQR_;_LVSLIGSK(bi)TQIPTQR_;_LVSLIGSK(bi)TQIPTQR_;_LVSLIGSK(bi)TQIPTQR_;_LVSLIGSK(bi)TQIPTQR_;_LVSLIGSK(bi)TQIPTQR_;_LVSLIGSK(bi)TQIPTQR_;_LVSLIGSK(bi)TQIPTQR_;_LVSLIGSK(bi)TQIPTQR_;_LVSLIGSK(bi)TQIPTQR_;_LVSLIGSK(bi)TQIPTQR_;_LVSLIGSK(bi)TQIPTQR_;_LVSLIGSK(bi)TQIPTQR_;_LVSLIGSK(bi)TQIPTQR_;_LVSLIGSK(bi)TQIPTQR_;_LVSLIGSK(bi)TQIPTQR_;_LVSLIGSK(bi)TQIPTQR_;_LV…	115	NA	0.920856	0.0175354	-0.0287544	0.172472	0.218767	0.241112	22.5717	23.0088	22.1346	22.6441	22.6439	22.3407	21.7575	22.1843	22.0812	22.3709	22.1367	22.2388
P26599	Homo sapiens (Human)	Polypyrimidine tract-binding protein 1 (PTB) (57 kDa RNA-binding protein PPTB-1) (Heterogeneous nuclear ribonucleoprotein I) (hnRNP I)	PTBP1 PTB	Biotin (K)	0	1	1	EGQEDQGLTKDYGNSPLHR	_EGQEDQGLTK(bi)DYGNSPLHR_;_EGQEDQGLTK(bi)DYGNSPLHR_;_EGQEDQGLTK(bi)DYGNSPLHR_;_EGQEDQGLTK(bi)DYGNSPLHR_;_EGQEDQGLTK(bi)DYGNSPLHR_;_EGQEDQGLTK(bi)DYGNSPLHR_;_EGQEDQGLTK(bi)DYGNSPLHR_	428	NA	0.00177583	1.30752	-0.55444	NA	NA	NA	21.8357	21.6333	21.7345	21.0989	21.2612	21.1801	NA	NA	NA	NA	NA	NA
P27105	Homo sapiens (Human)	Stomatin (Erythrocyte band 7 integral membrane protein) (Erythrocyte membrane protein band 7.2) (Protein 7.2b)	STOM BND7 EPB72	Biotin (K)	0	1	1	ALKEASMVITESPAALQLR	_ALK(bi)EASMVITESPAALQLR_;_ALK(bi)EASMVITESPAALQLR_	235	NA	NA	NA	NA	NA	NA	NA	NA	NA	NA	NA	NA	NA	NA	NA	NA	NA	NA	NA
P28289	Homo sapiens (Human)	Tropomodulin-1 (Erythrocyte tropomodulin) (E-Tmod)	TMOD1 D9S57E TMOD	Biotin (K)	0	1	1	LADLTGPIIPKCR	_LADLTGPIIPK(bi)CR_;_LADLTGPIIPK(bi)CR_;_LADLTGPIIPK(bi)CR_;_LADLTGPIIPK(bi)CR_;_LADLTGPIIPK(bi)CR_;_LADLTGPIIPK(bi)CR_;_LADLTGPIIPK(bi)CR_;_LADLTGPIIPK(bi)CR_;_LADLTGPIIPK(bi)CR_;_LADLTGPIIPK(bi)CR_;_LADLTGPIIPK(bi)CR_;_LADLTGPIIPK(bi)CR_;_LADLTGPIIPK(bi)CR_;_LADLTGPIIPK(bi)CR_;_LADLTGPIIPK(bi)CR_;_LADLTGPIIPK(bi)CR_;_LADLTGPIIPK(bi)CR_;_LADLTGPIIPK(bi)CR_;_LADLTGPIIPK(bi)CR_;_LADLTGPIIPK(bi)CR_…	354	NA	0.0449906	0.6553	-0.435409	0.18664	0.198665	-0.381388	25.1885	25.2951	25.2127	25.0901	24.6789	24.621	23.3601	22.8695	23.4768	22.5634	23.07	22.9289
P28289	Homo sapiens (Human)	Tropomodulin-1 (Erythrocyte tropomodulin) (E-Tmod)	TMOD1 D9S57E TMOD	Biotin (K)	0	1	2	RLADLTGPIIPKCR	_RLADLTGPIIPK(bi)CR_;_RLADLTGPIIPK(bi)CR_;_RLADLTGPIIPK(bi)CR_;_RLADLTGPIIPK(bi)CR_;_RLADLTGPIIPK(bi)CR_	354	NA	0.843568	0.0331368	-0.0376211	NA	NA	NA	22.0196	21.7001	21.6924	21.7664	22.0133	21.5195	NA	NA	NA	NA	NA	NA
P29972	Homo sapiens (Human)	Aquaporin-1 (AQP-1) (Aquaporin-CHIP) (Urine water channel) (Water channel protein for red blood cells and kidney proximal tubule)	AQP1 CHIP28	Biotin (K)	0	1	1	VEMKPK	_VEMK(bi)PK_;_VEMK(bi)PK_;_VEMK(bi)PK_;_VEMK(bi)PK_;_VEMK(bi)PK_;_VEMK(bi)PK_;_VEMK(bi)PK_;_VEMK(bi)PK_;_VEMK(bi)PK_;_VEMK(bi)PK_;_VEMK(bi)PK_;_VEMK(bi)PK_;_VEMK(bi)PK_;_VEMK(bi)PK_;_VEMK(bi)PK_	267	NA	0.767721	0.0447459	-0.137306	0.836401	0.0238696	0.0683246	22.9852	23.1795	22.3219	22.7699	23.2518	22.0532	21.0705	21.8374	21.454	21.6254	21.836	21.1054
P29972	Homo sapiens (Human)	Aquaporin-1 (AQP-1) (Aquaporin-CHIP) (Urine water channel) (Water channel protein for red blood cells and kidney proximal tubule)	AQP1 CHIP28	Biotin (K)	0	1	2	VWTSGQVEEYDLDADDINSRVEMKPK	_VWTSGQVEEYDLDADDINSRVEMK(bi)PK_;_VWTSGQVEEYDLDADDINSRVEMK(bi)PK_;_VWTSGQVEEYDLDADDINSRVEMK(bi)PK_;_VWTSGQVEEYDLDADDINSRVEMK(bi)PK_;_VWTSGQVEEYDLDADDINSRVEMK(bi)PK_;_VWTSGQVEEYDLDADDINSRVEMK(bi)PK_;_VWTSGQVEEYDLDADDINSRVEMK(bi)PK_;_VWTSGQVEEYDLDADDINSRVEMKPK(bi)_;_VWTSGQVEEYDLDADDINSRVEMK(bi)PK_;_VWTSGQVEEYDLDADDINSRVEM(ox)K(bi)PK_	267;269	NA	0.726992	0.0553195	0.121601	NA	NA	NA	22.5304	23.0296	21.9425	22.6329	22.7584	22.4759	NA	NA	NA	NA	NA	NA
P30043	Homo sapiens (Human)	Flavin reductase (NADPH) (FR) (EC 1.5.1.30) (Biliverdin reductase B) (BVR-B) (EC 1.3.1.24) (Biliverdin-IX beta-reductase) (Green heme-binding protein) (GHBP) (NADPH-dependent diaphorase) (NADPH-flavin reductase) (FLR)	BLVRB FLR	Biotin (K)	0	1	1	VISKHDLGHFMLR	_VISK(bi)HDLGHFMLR_;_VISK(bi)HDLGHFMLR_;_VISK(bi)HDLGHFMLR_	178	NA	NA	NA	NA	NA	NA	NA	NA	NA	NA	NA	NA	NA	NA	NA	NA	NA	NA	NA
P30613	Homo sapiens (Human)	Pyruvate kinase PKLR (EC 2.7.1.40) (Pyruvate kinase 1) (Pyruvate kinase isozymes L/R) (R-type/L-type pyruvate kinase) (Red cell/liver pyruvate kinase)	PKLR PK1 PKL	Biotin (K)	0	1	1	DLAKSILIGAPGGPAGYLR	_DLAK(bi)SILIGAPGGPAGYLR_;_DLAK(bi)SILIGAPGGPAGYLR_;_DLAK(bi)SILIGAPGGPAGYLR_	25	NA	NA	NA	NA	NA	NA	NA	NA	NA	NA	NA	NA	NA	NA	NA	NA	NA	NA	NA
P30613	Homo sapiens (Human)	Pyruvate kinase PKLR (EC 2.7.1.40) (Pyruvate kinase 1) (Pyruvate kinase isozymes L/R) (R-type/L-type pyruvate kinase) (Red cell/liver pyruvate kinase)	PKLR PK1 PKL	Biotin (K)	0	1	1	SWVSKSQR	_SWVSK(bi)SQR_;_SWVSK(bi)SQR_	18	NA	NA	NA	NA	NA	NA	NA	NA	NA	NA	NA	NA	NA	NA	NA	NA	NA	NA	NA
P31948	Homo sapiens (Human)	Stress-induced-phosphoprotein 1 (STI1) (Hsc70/Hsp90-organizing protein) (Hop) (Renal carcinoma antigen NY-REN-11) (Transformation-sensitive protein IEF SSP 3521)	STIP1	Biotin (K)	0	1	2	LILEQMQKDPQALSEHLKNPVIAQK	_LILEQMQKDPQALSEHLK(bi)NPVIAQK_;_LILEQMQKDPQALSEHLK(bi)NPVIAQK_;_LILEQMQKDPQALSEHLK(bi)NPVIAQK_;_LILEQMQKDPQALSEHLK(bi)NPVIAQK_;_LILEQMQKDPQALSEHLK(bi)NPVIAQK_;_LILEQMQKDPQALSEHLK(bi)NPVIAQK_;_LILEQMQKDPQALSEHLK(bi)NPVIAQK_;_LILEQMQKDPQALSEHLK(bi)NPVIAQK_;_LILEQMQKDPQALSEHLK(bi)NPVIAQK_;_LILEQMQKDPQALSEHLK(bi)NPVIAQK_;_LILEQMQKDPQALSEHLK(bi)NPVIAQK_;_LILEQMQKDPQALSEHLKNPVIAQK(bi)_	523;530	NA	0.331955	0.217418	-0.353332	0.0332768	0.534622	-0.748557	22.859	23.0372	22.1493	22.238	22.6585	22.0889	21.9398	22.2856	22.6315	21.5371	21.3231	21.7511
P31948	Homo sapiens (Human)	Stress-induced-phosphoprotein 1 (STI1) (Hsc70/Hsp90-organizing protein) (Hop) (Renal carcinoma antigen NY-REN-11) (Transformation-sensitive protein IEF SSP 3521)	STIP1	Biotin (K)	0	1	2	NKPSDLGTKLQDPR	_NKPSDLGTK(bi)LQDPR_;_NKPSDLGTK(bi)LQDPR_;_NKPSDLGTK(bi)LQDPR_;_NKPSDLGTK(bi)LQDPR_;_NKPSDLGTK(bi)LQDPR_;_NKPSDLGTK(bi)LQDPR_;_NKPSDLGTK(bi)LQDPR_;_NKPSDLGTK(bi)LQDPR_;_NKPSDLGTK(bi)LQDPR_;_NKPSDLGTK(bi)LQDPR_;_NKPSDLGTK(bi)LQDPR_	169	NA	0.00825357	1.0038	-0.705336	0.400026	0.115217	-0.450486	21.1165	20.6968	20.9067	20.2013	20.3394	20.0633	21.1589	20.7986	22.3603	21.1265	20.9888	20.851
P34931	Homo sapiens (Human)	Heat shock 70 kDa protein 1-like (Heat shock 70 kDa protein 1L) (Heat shock 70 kDa protein 1-Hom) (HSP70-Hom)	HSPA1L	Biotin (K)	0	1	1	ITITNDKGR	_ITITNDK(bi)GR_;_ITITNDK(bi)GR_;_ITITNDK(bi)GR_;_ITITNDK(bi)GR_;_ITITNDK(bi)GR_;_ITITNDK(bi)GR_;_ITITNDK(bi)GR_;_ITITNDK(bi)GR_;_ITITNDK(bi)GR_;_ITITNDK(bi)GR_;_ITITNDK(bi)GR_	509	NA	0.296138	0.243936	-0.170136	0.552842	0.0747631	-0.0962039	20.9319	20.9509	21.3017	20.7546	21.0132	20.9063	22.369	22.4758	22.4195	22.5772	22.3253	22.0734
P35611	Homo sapiens (Human)	Alpha-adducin (Erythrocyte adducin subunit alpha)	ADD1 ADDA	Biotin (K)	0	1	1	AAVVTSPPPTTAPHKER	_AAVVTSPPPTTAPHK(bi)ER_;_AAVVTSPPPTTAPHK(bi)ER_;_AAVVTSPPPTTAPHK(bi)ER_;_AAVVTSPPPTTAPHK(bi)ER_;_AAVVTSPPPTTAPHK(bi)ER_;_AAVVTSPPPTTAPHK(bi)ER_;_AAVVTSPPPTTAPHK(bi)ER_;_AAVVTSPPPTTAPHK(bi)ER_;_AAVVTSPPPTTAPHK(bi)ER_	21	NA	NA	NA	NA	0.831187	0.0243508	-0.124571	NA	NA	NA	NA	NA	NA	20.4008	20.5279	20.2855	19.2155	20.9985	20.6265
P35611	Homo sapiens (Human)	Alpha-adducin (Erythrocyte adducin subunit alpha)	ADD1 ADDA	Biotin (K)	0	1	3	AIIEKEYQPHVIVSTTGPNPFTTLTDRELEEYRR	_AIIEK(bi)EYQPHVIVSTTGPNPFTTLTDRELEEYRR_;_AIIEK(bi)EYQPHVIVSTTGPNPFTTLTDRELEEYRR_;_AIIEK(bi)EYQPHVIVSTTGPNPFTTLTDRELEEYRR_;_AIIEK(bi)EYQPHVIVSTTGPNPFTTLTDRELEEYRR_	548	NA	NA	NA	NA	NA	NA	NA	NA	NA	NA	NA	NA	NA	NA	NA	NA	NA	NA	NA
P35611	Homo sapiens (Human)	Alpha-adducin (Erythrocyte adducin subunit alpha)	ADD1 ADDA	Biotin (K)	0	1	1	EQNLQDIKTAGPQSQVLCGVVMDR	_EQNLQDIK(bi)TAGPQSQVLCGVVMDR_;_EQNLQDIK(bi)TAGPQSQVLCGVVMDR_	515	NA	NA	NA	NA	NA	NA	NA	NA	NA	NA	NA	NA	NA	NA	NA	NA	NA	NA	NA
P35611	Homo sapiens (Human)	Alpha-adducin (Erythrocyte adducin subunit alpha)	ADD1 ADDA	Biotin (K)	0	1	2	IREQNLQDIKTAGPQSQVLCGVVMDR	_IREQNLQDIK(bi)TAGPQSQVLCGVVMDR_;_IREQNLQDIK(bi)TAGPQSQVLCGVVMDR_;_IREQNLQDIK(bi)TAGPQSQVLCGVVMDR_	515	NA	NA	NA	NA	NA	NA	NA	NA	NA	NA	NA	NA	NA	NA	NA	NA	NA	NA	NA
P35611	Homo sapiens (Human)	Alpha-adducin (Erythrocyte adducin subunit alpha)	ADD1 ADDA	Biotin (K)	0	1	1	SLVQGELVTASKAIIEK	_SLVQGELVTASK(bi)AIIEK_;_SLVQGELVTASK(bi)AIIEK_;_SLVQGELVTASK(bi)AIIEK_;_SLVQGELVTASK(bi)AIIEK_;_SLVQGELVTASK(bi)AIIEK_	543	NA	NA	NA	NA	0.227408	0.180975	-0.236664	NA	NA	NA	NA	NA	NA	21.7179	21.7767	21.7473	21.7969	21.2244	21.5106
P35612	Homo sapiens (Human)	Beta-adducin (Erythrocyte adducin subunit beta)	ADD2 ADDB	Biotin (K);Oxidation (M)	0	1	1	ADEVEKSSSGMPIR	_ADEVEK(bi)SSSGMPIR_;_ADEVEK(bi)SSSGMPIR_;_ADEVEK(bi)SSSGMPIR_;_ADEVEK(bi)SSSGMPIR_;_ADEVEK(bi)SSSGMPIR_;_ADEVEK(bi)SSSGMPIR_;_ADEVEK(bi)SSSGMPIR_;_ADEVEK(bi)SSSGMPIR_;_ADEVEK(bi)SSSGMPIR_;_ADEVEK(bi)SSSGMPIR_;_ADEVEK(bi)SSSGMPIR_;_ADEVEK(bi)SSSGMPIR_;_ADEVEK(bi)SSSGMPIR_;_ADEVEK(bi)SSSGMPIR_;_ADEVEK(bi)SSSGMPIR_;_ADEVEK(bi)SSSGMPIR_;_ADEVEK(bi)SSSGMPIR_;_ADEVEK(bi)SSSGM(ox)PIR_;_ADEVEK(bi)SSSGM(…	470	NA	0.265947	0.268547	-0.206527	0.778843	0.036971	-0.0773147	20.0559	19.8326	20.2792	19.8494	19.6856	20.0131	21.161	20.5751	21.3622	21.138	20.9451	20.7834
P35612	Homo sapiens (Human)	Beta-adducin (Erythrocyte adducin subunit beta)	ADD2 ADDB	Biotin (K)	0	1	1	ADEVEKSSSGMPIR	_ADEVEK(bi)SSSGMPIR_;_ADEVEK(bi)SSSGMPIR_;_ADEVEK(bi)SSSGMPIR_;_ADEVEK(bi)SSSGMPIR_;_ADEVEK(bi)SSSGMPIR_;_ADEVEK(bi)SSSGMPIR_;_ADEVEK(bi)SSSGMPIR_;_ADEVEK(bi)SSSGMPIR_;_ADEVEK(bi)SSSGMPIR_;_ADEVEK(bi)SSSGMPIR_;_ADEVEK(bi)SSSGMPIR_;_ADEVEK(bi)SSSGMPIR_;_ADEVEK(bi)SSSGMPIR_;_ADEVEK(bi)SSSGMPIR_;_ADEVEK(bi)SSSGMPIR_;_ADEVEK(bi)SSSGMPIR_;_ADEVEK(bi)SSSGMPIR_;_ADEVEK(bi)SSSGM(ox)PIR_;_ADEVEK(bi)SSSGM(…	470	NA	0.960585	0.00956447	0.0115272	0.665998	0.0548982	-0.0900614	23.0136	23.1378	23.3503	23.1788	22.8394	23.5181	24.8037	24.9865	25.2014	24.6425	25.1819	24.897
P35612	Homo sapiens (Human)	Beta-adducin (Erythrocyte adducin subunit beta)	ADD2 ADDB	2 Oxidation (M);Biotin (K)	0	1	2	ADEVEKSSSGMPIRIENPNQFVPLYTDPQEVLEMR	_ADEVEK(bi)SSSGMPIRIENPNQFVPLYTDPQEVLEMR_;_ADEVEK(bi)SSSGMPIRIENPNQFVPLYTDPQEVLEMR_;_ADEVEK(bi)SSSGMPIRIENPNQFVPLYTDPQEVLEMR_;_ADEVEK(bi)SSSGMPIRIENPNQFVPLYTDPQEVLEMR_;_ADEVEK(bi)SSSGMPIRIENPNQFVPLYTDPQEVLEMR_;_ADEVEK(bi)SSSGMPIRIENPNQFVPLYTDPQEVLEMR_;_ADEVEK(bi)SSSGMPIRIENPNQFVPLYTDPQEVLEMR_;_ADEVEK(bi)SSSGMPIRIENPNQFVPLYTDPQEVLEMR_;_ADEVEK(bi)SSSGMPIRIENPNQFVPLYTDPQEVLEMR_;_ADEVEK(bi)SSSGMPIRIE…	470	NA	NA	NA	NA	NA	NA	NA	NA	NA	NA	NA	NA	NA	NA	NA	NA	NA	NA	NA
P35612	Homo sapiens (Human)	Beta-adducin (Erythrocyte adducin subunit beta)	ADD2 ADDB	Biotin (K)	0	1	2	ADEVEKSSSGMPIRIENPNQFVPLYTDPQEVLEMR	_ADEVEK(bi)SSSGMPIRIENPNQFVPLYTDPQEVLEMR_;_ADEVEK(bi)SSSGMPIRIENPNQFVPLYTDPQEVLEMR_;_ADEVEK(bi)SSSGMPIRIENPNQFVPLYTDPQEVLEMR_;_ADEVEK(bi)SSSGMPIRIENPNQFVPLYTDPQEVLEMR_;_ADEVEK(bi)SSSGMPIRIENPNQFVPLYTDPQEVLEMR_;_ADEVEK(bi)SSSGMPIRIENPNQFVPLYTDPQEVLEMR_;_ADEVEK(bi)SSSGMPIRIENPNQFVPLYTDPQEVLEMR_;_ADEVEK(bi)SSSGMPIRIENPNQFVPLYTDPQEVLEMR_;_ADEVEK(bi)SSSGMPIRIENPNQFVPLYTDPQEVLEMR_;_ADEVEK(bi)SSSGMPIRIE…	470	NA	0.501955	0.132448	-0.09012	0.0274322	0.557082	2.18433	22.0335	22.453	22.2433	22.124	22.1531	22.1823	21.2497	19.3949	20.5744	22.4097	22.1008	23.2615
P35612	Homo sapiens (Human)	Beta-adducin (Erythrocyte adducin subunit beta)	ADD2 ADDB	Biotin (K)	0	1	1	EAETKSPLVSPSK	_EAETK(bi)SPLVSPSK_;_EAETK(bi)SPLVSPSK_;_EAETK(bi)SPLVSPSK_;_EAETK(bi)SPLVSPSK_;_EAETK(bi)SPLVSPSK_;_EAETK(bi)SPLVSPSK_;_EAETK(bi)SPLVSPSK_;_EAETK(bi)SPLVSPSK_;_EAETK(bi)SPLVSPSK_;_EAETK(bi)SPLVSPSK_;_EAETK(bi)SPLVSPSK_;_EAETK(bi)SPLVSPSK_;_EAETK(bi)SPLVSPSK_	612	NA	0.262257	0.271027	-0.251589	0.875964	0.0149963	-0.0418681	21.9848	21.9637	22.3729	21.6524	21.7907	22.1235	21.4566	21.1341	21.9587	21.3269	21.5804	21.5165
P35612	Homo sapiens (Human)	Beta-adducin (Erythrocyte adducin subunit beta)	ADD2 ADDB	Biotin (K)	0	1	2	EQNRQDVKSAGPQSQLLASVIAEK	_EQNRQDVK(bi)SAGPQSQLLASVIAEK_;_EQNRQDVK(bi)SAGPQSQLLASVIAEK_;_EQNRQDVK(bi)SAGPQSQLLASVIAEK_;_EQNRQDVK(bi)SAGPQSQLLASVIAEK_;_EQNRQDVK(bi)SAGPQSQLLASVIAEK_;_EQNRQDVK(bi)SAGPQSQLLASVIAEK_;_EQNRQDVK(bi)SAGPQSQLLASVIAEK_;_EQNRQDVK(bi)SAGPQSQLLASVIAEK_;_EQNRQDVK(bi)SAGPQSQLLASVIAEK_;_EQNRQDVK(bi)SAGPQSQLLASVIAEK_;_EQNRQDVK(bi)SAGPQSQLLASVIAEK_;_EQNRQDVK(bi)SAGPQSQLLASVIAEK_;_EQNRQDVK(bi)SAGPQSQLLASVIA…	511	NA	0.874318	0.0294316	-0.0351556	NA	NA	NA	22.7438	23.0921	22.6098	22.9172	22.4782	22.9447	NA	NA	NA	NA	NA	NA
P35612	Homo sapiens (Human)	Beta-adducin (Erythrocyte adducin subunit beta)	ADD2 ADDB	Biotin (K)	0	1	3	IREQNRQDVKSAGPQSQLLASVIAEK	_IREQNRQDVK(bi)SAGPQSQLLASVIAEK_;_IREQNRQDVK(bi)SAGPQSQLLASVIAEK_;_IREQNRQDVK(bi)SAGPQSQLLASVIAEK_;_IREQNRQDVK(bi)SAGPQSQLLASVIAEK_;_IREQNRQDVK(bi)SAGPQSQLLASVIAEK_;_IREQNRQDVK(bi)SAGPQSQLLASVIAEK_	511	NA	0.782661	0.0447459	-0.0839122	NA	NA	NA	22.1432	22.4302	21.4971	21.8168	22.0554	21.9465	NA	NA	NA	NA	NA	NA
P35612	Homo sapiens (Human)	Beta-adducin (Erythrocyte adducin subunit beta)	ADD2 ADDB	Biotin (K)	0	1	3	KKLELDGEKETAPEEPGSPAK	_K(bi)KLELDGEKETAPEEPGSPAK_;_K(bi)KLELDGEKETAPEEPGSPAK_;_K(bi)KLELDGEKETAPEEPGSPAK_;_K(bi)KLELDGEKETAPEEPGSPAK_;_K(bi)KLELDGEKETAPEEPGSPAK_;_K(bi)KLELDGEKETAPEEPGSPAK_;_K(bi)KLELDGEKETAPEEPGSPAK_;_K(bi)KLELDGEKETAPEEPGSPAK_;_K(bi)KLELDGEKETAPEEPGSPAK_;_K(bi)KLELDGEKETAPEEPGSPAK_;_K(bi)KLELDGEKETAPEEPGSPAK_;_K(bi)KLELDGEKETAPEEPGSPAK_	575	NA	0.946458	0.0121637	-0.0586989	NA	NA	NA	22.5669	21.0105	22.2119	20.6751	21.9343	23.0038	NA	NA	NA	NA	NA	NA
P35612	Homo sapiens (Human)	Beta-adducin (Erythrocyte adducin subunit beta)	ADD2 ADDB	Biotin (K)	0	1	1	PKTTWMK	_PK(bi)TTWMK_	459	NA	NA	NA	NA	NA	NA	NA	NA	NA	NA	NA	NA	NA	NA	NA	NA	NA	NA	NA
P35612	Homo sapiens (Human)	Beta-adducin (Erythrocyte adducin subunit beta)	ADD2 ADDB	Biotin (K)	0	1	1	SAGPQSQLLASVIAEKSR	_SAGPQSQLLASVIAEK(bi)SR_;_SAGPQSQLLASVIAEK(bi)SR_;_SAGPQSQLLASVIAEK(bi)SR_;_SAGPQSQLLASVIAEK(bi)SR_;_SAGPQSQLLASVIAEK(bi)SR_;_SAGPQSQLLASVIAEK(bi)SR_	527	NA	NA	NA	NA	NA	NA	NA	NA	NA	NA	NA	NA	NA	NA	NA	NA	NA	NA	NA
P35612	Homo sapiens (Human)	Beta-adducin (Erythrocyte adducin subunit beta)	ADD2 ADDB	Biotin (K)	0	1	2	SAPASPVQSPAKEAETKSPLVSPSK	_SAPASPVQSPAKEAETK(bi)SPLVSPSK_;_SAPASPVQSPAK(bi)EAETKSPLVSPSK_;_SAPASPVQSPAKEAETK(bi)SPLVSPSK_;_SAPASPVQSPAKEAETK(bi)SPLVSPSK_;_SAPASPVQSPAKEAETK(bi)SPLVSPSK_;_SAPASPVQSPAKEAETK(bi)SPLVSPSK_;_SAPASPVQSPAKEAETK(bi)SPLVSPSK_	612;607	NA	0.280194	0.253371	0.307871	NA	NA	NA	22.679	22.3812	23.0385	23.0572	23.2518	22.7134	NA	NA	NA	NA	NA	NA
P35612	Homo sapiens (Human)	Beta-adducin (Erythrocyte adducin subunit beta)	ADD2 ADDB	Biotin (K)	0	1	2	SLEEGTKKTETSK	_SLEEGTKK(bi)TETSK_;_SLEEGTKK(bi)TETSK_;_SLEEGTKK(bi)TETSK_;_SLEEGTKK(bi)TETSK_;_SLEEGTKK(bi)TETSK_;_SLEEGTKK(bi)TETSK_	628	NA	0.774701	0.0447459	-0.0614256	NA	NA	NA	19.3304	19.0575	19.7253	19.2427	19.4108	19.2754	NA	NA	NA	NA	NA	NA
P35612	Homo sapiens (Human)	Beta-adducin (Erythrocyte adducin subunit beta)	ADD2 ADDB	Biotin (K);Oxidation (M)	0	1	2	SMGSPRPKTTWMK	_SMGSPRPK(bi)TTWM(ox)K_;_SMGSPRPK(bi)TTWM(ox)K_;_SMGSPRPK(bi)TTWM(ox)K_;_SMGSPRPK(bi)TTWM(ox)K_	459	NA	NA	NA	NA	0.2527	0.167984	-0.186207	NA	NA	NA	NA	NA	NA	20.5807	20.8167	20.6987	20.5125	20.3017	20.7232
P35612	Homo sapiens (Human)	Beta-adducin (Erythrocyte adducin subunit beta)	ADD2 ADDB	Biotin (K)	0	1	2	SPLVSPSKSLEEGTKK	_SPLVSPSK(bi)SLEEGTKK_;_SPLVSPSK(bi)SLEEGTKK_;_SPLVSPSK(bi)SLEEGTKK_;_SPLVSPSK(bi)SLEEGTKK_;_SPLVSPSK(bi)SLEEGTKK_;_SPLVSPSK(bi)SLEEGTKK_;_SPLVSPSK(bi)SLEEGTKK_	620	NA	NA	NA	NA	NA	NA	NA	NA	NA	NA	NA	NA	NA	NA	NA	NA	NA	NA	NA
P35612	Homo sapiens (Human)	Beta-adducin (Erythrocyte adducin subunit beta)	ADD2 ADDB	Biotin (K)	0	1	2	TTWMKADEVEKSSSGMPIR	_TTWMKADEVEK(bi)SSSGMPIR_;_TTWMKADEVEK(bi)SSSGMPIR_;_TTWMKADEVEK(bi)SSSGMPIR_;_TTWMKADEVEK(bi)SSSGMPIR_;_TTWMKADEVEK(bi)SSSGMPIR_;_TTWMKADEVEK(bi)SSSGMPIR_;_TTWMKADEVEK(bi)SSSGMPIR_;_TTWMKADEVEK(bi)SSSGMPIR_;_TTWMKADEVEK(bi)SSSGMPIR_	470	NA	0.43399	0.160083	0.315294	NA	NA	NA	22.0273	23.1059	22.4524	22.8348	23.1643	22.5324	NA	NA	NA	NA	NA	NA
P37802	Homo sapiens (Human)	Transgelin-2 (Epididymis tissue protein Li 7e) (SM22-alpha homolog)	TAGLN2 KIAA0120 CDABP0035	Biotin (K)	0	1	1	NFSDNQLQEGKNVIGLQMGTNR	_NFSDNQLQEGK(bi)NVIGLQM(ox)GTNR_;_NFSDNQLQEGK(bi)NVIGLQM(ox)GTNR_;_NFSDNQLQEGK(bi)NVIGLQM(ox)GTNR_;_NFSDNQLQEGK(bi)NVIGLQM(ox)GTNR_;_NFSDNQLQEGK(bi)NVIGLQM(ox)GTNR_;_NFSDNQLQEGK(bi)NVIGLQM(ox)GTNR_;_NFSDNQLQEGK(bi)NVIGLQM(ox)GTNR_;_NFSDNQLQEGK(bi)NVIGLQM(ox)GTNR_;_NFSDNQLQEGK(bi)NVIGLQMGTNR_;_NFSDNQLQEGK(bi)NVIGLQMGTNR_;_NFSDNQLQEGK(bi)NVIGLQMGTNR_;_NFSDNQLQEGK(bi)NVIGLQMGTNR_;_NFSDNQLQEGK(bi)NVI…	171	NA	0.883572	0.0273928	0.0458644	0.032764	0.534622	-0.274278	24.1266	24.9396	24.2671	24.2122	24.7407	24.5181	23.1889	23.1434	23.1935	22.7379	22.9471	23.018
P37802	Homo sapiens (Human)	Transgelin-2 (Epididymis tissue protein Li 7e) (SM22-alpha homolog)	TAGLN2 KIAA0120 CDABP0035	Biotin (K);Oxidation (M)	0	1	1	NFSDNQLQEGKNVIGLQMGTNR	_NFSDNQLQEGK(bi)NVIGLQM(ox)GTNR_;_NFSDNQLQEGK(bi)NVIGLQM(ox)GTNR_;_NFSDNQLQEGK(bi)NVIGLQM(ox)GTNR_;_NFSDNQLQEGK(bi)NVIGLQM(ox)GTNR_;_NFSDNQLQEGK(bi)NVIGLQM(ox)GTNR_;_NFSDNQLQEGK(bi)NVIGLQM(ox)GTNR_;_NFSDNQLQEGK(bi)NVIGLQM(ox)GTNR_;_NFSDNQLQEGK(bi)NVIGLQM(ox)GTNR_;_NFSDNQLQEGK(bi)NVIGLQMGTNR_;_NFSDNQLQEGK(bi)NVIGLQMGTNR_;_NFSDNQLQEGK(bi)NVIGLQMGTNR_;_NFSDNQLQEGK(bi)NVIGLQMGTNR_;_NFSDNQLQEGK(bi)NVI…	171	NA	0.902226	0.0228985	-0.0517889	NA	NA	NA	22.8545	23.158	23.5291	22.5987	23.7748	23.0127	NA	NA	NA	NA	NA	NA
P37840	Homo sapiens (Human)	Alpha-synuclein (Non-A beta component of AD amyloid) (Non-A4 component of amyloid precursor) (NACP)	SNCA NACP PARK1	Biotin (K)	0	1	1	AKEGVVAAAEK	_AK(bi)EGVVAAAEK_;_AK(bi)EGVVAAAEK_;_AK(bi)EGVVAAAEK_;_AK(bi)EGVVAAAEK_;_AK(bi)EGVVAAAEK_;_AK(bi)EGVVAAAEK_;_AK(bi)EGVVAAAEK_;_AK(bi)EGVVAAAEK_;_AK(bi)EGVVAAAEK_;_AK(bi)EGVVAAAEK_;_AK(bi)EGVVAAAEK_;_AK(bi)EGVVAAAEK_	12	NA	0.967617	0.00753414	0.0105444	0.940533	0.0109965	0.0356019	23.015	23.2843	22.6235	23.0572	23.2024	22.6948	21.5672	22.0055	21.1001	21.6867	22.1723	20.9206
P37840	Homo sapiens (Human)	Alpha-synuclein (Non-A beta component of AD amyloid) (Non-A4 component of amyloid precursor) (NACP)	SNCA NACP PARK1	Biotin (K)	0	1	2	AKEGVVAAAEKTK	_AKEGVVAAAEK(bi)TK_;_AK(bi)EGVVAAAEKTK_;_AKEGVVAAAEK(bi)TK_;_AK(bi)EGVVAAAEKTK_;_AKEGVVAAAEK(bi)TK_;_AK(bi)EGVVAAAEKTK_;_AKEGVVAAAEK(bi)TK_;_AKEGVVAAAEK(bi)TK_;_AK(bi)EGVVAAAEKTK_;_AKEGVVAAAEK(bi)TK_	21;12	NA	0.67835	0.0701938	0.298474	NA	NA	NA	21.5901	21.6969	20.9528	22.2854	22.3903	20.4595	NA	NA	NA	NA	NA	NA
P37840	Homo sapiens (Human)	Alpha-synuclein (Non-A beta component of AD amyloid) (Non-A4 component of amyloid precursor) (NACP)	SNCA NACP PARK1	Biotin (K)	0	1	3	AKEGVVAAAEKTKQGVAEAAGK	_AKEGVVAAAEKTK(bi)QGVAEAAGK_;_AKEGVVAAAEKTK(bi)QGVAEAAGK_;_AKEGVVAAAEKTK(bi)QGVAEAAGK_;_AKEGVVAAAEKTK(bi)QGVAEAAGK_;_AKEGVVAAAEKTK(bi)QGVAEAAGK_;_AKEGVVAAAEKTK(bi)QGVAEAAGK_;_AKEGVVAAAEKTK(bi)QGVAEAAGK_;_AKEGVVAAAEKTK(bi)QGVAEAAGK_;_AKEGVVAAAEKTK(bi)QGVAEAAGK_	23	NA	NA	NA	NA	NA	NA	NA	NA	NA	NA	NA	NA	NA	NA	NA	NA	NA	NA	NA
P37840	Homo sapiens (Human)	Alpha-synuclein (Non-A beta component of AD amyloid) (Non-A4 component of amyloid precursor) (NACP)	SNCA NACP PARK1	Biotin (K)	0	1	1	EGVLYVGSKTK	_EGVLYVGSK(bi)TK_;_EGVLYVGSK(bi)TK_;_EGVLYVGSK(bi)TK_;_EGVLYVGSK(bi)TK_;_EGVLYVGSK(bi)TK_;_EGVLYVGSKTK(bi)_;_EGVLYVGSKTK(bi)_;_EGVLYVGSKTK(bi)_;_EGVLYVGSK(bi)TK_;_EGVLYVGSK(bi)TK_;_EGVLYVGSK(bi)TK_;_EGVLYVGSK(bi)TK_;_EGVLYVGSK(bi)TK_;_EGVLYVGSKTK(bi)_;_EGVLYVGSK(bi)TK_;_EGVLYVGSK(bi)TK_;_EGVLYVGSK(bi)TK_;_EGVLYVGSK(bi)TK_;_EGVLYVGSK(bi)TK_;_EGVLYVGSK(bi)TK_;_EGVLYVGSKTK(bi)_;_EGVLYVGSK(bi)TK_;_EG…	43;45	NA	0.915424	0.0189371	-0.0333389	0.356463	0.133818	-0.403975	30.4652	30.5881	30.0668	30.4857	30.6803	29.8541	28.852	28.9656	28.3699	28.7324	28.598	27.6452
P37840	Homo sapiens (Human)	Alpha-synuclein (Non-A beta component of AD amyloid) (Non-A4 component of amyloid precursor) (NACP)	SNCA NACP PARK1	2 Biotin (K)	0	2	2	EGVLYVGSKTKEGVVHGVATVAEK	_EGVLYVGSK(bi)TK(bi)EGVVHGVATVAEK_;_EGVLYVGSK(bi)TK(bi)EGVVHGVATVAEK_;_EGVLYVGSK(bi)TK(bi)EGVVHGVATVAEK_;_EGVLYVGSK(bi)TK(bi)EGVVHGVATVAEK_;_EGVLYVGSK(bi)TK(bi)EGVVHGVATVAEK_;_EGVLYVGSK(bi)TKEGVVHGVATVAEK_;_EGVLYVGSK(bi)TKEGVVHGVATVAEK_	43;45	NA	NA	NA	NA	NA	NA	NA	NA	NA	NA	NA	NA	NA	NA	NA	NA	NA	NA	NA
P37840	Homo sapiens (Human)	Alpha-synuclein (Non-A beta component of AD amyloid) (Non-A4 component of amyloid precursor) (NACP)	SNCA NACP PARK1	Biotin (K)	0	1	2	EGVLYVGSKTKEGVVHGVATVAEK	_EGVLYVGSK(bi)TK(bi)EGVVHGVATVAEK_;_EGVLYVGSK(bi)TK(bi)EGVVHGVATVAEK_;_EGVLYVGSK(bi)TK(bi)EGVVHGVATVAEK_;_EGVLYVGSK(bi)TK(bi)EGVVHGVATVAEK_;_EGVLYVGSK(bi)TK(bi)EGVVHGVATVAEK_;_EGVLYVGSK(bi)TKEGVVHGVATVAEK_;_EGVLYVGSK(bi)TKEGVVHGVATVAEK_	43;45	NA	NA	NA	NA	NA	NA	NA	NA	NA	NA	NA	NA	NA	NA	NA	NA	NA	NA	NA
P37840	Homo sapiens (Human)	Alpha-synuclein (Non-A beta component of AD amyloid) (Non-A4 component of amyloid precursor) (NACP)	SNCA NACP PARK1	Biotin (K)	0	1	2	EGVVAAAEKTKQGVAEAAGK	_EGVVAAAEKTK(bi)QGVAEAAGK_;_EGVVAAAEKTK(bi)QGVAEAAGK_;_EGVVAAAEKTK(bi)QGVAEAAGK_	23	NA	NA	NA	NA	NA	NA	NA	NA	NA	NA	NA	NA	NA	NA	NA	NA	NA	NA	NA
P37840	Homo sapiens (Human)	Alpha-synuclein (Non-A beta component of AD amyloid) (Non-A4 component of amyloid precursor) (NACP)	SNCA NACP PARK1	Biotin (K)	0	1	1	EGVVHGVATVAEKTK	_EGVVHGVATVAEK(bi)TK_;_EGVVHGVATVAEK(bi)TK_;_EGVVHGVATVAEK(bi)TK_;_EGVVHGVATVAEK(bi)TK_	58	NA	0.00944244	0.983305	-0.556455	NA	NA	NA	24.9276	24.8548	24.8912	24.5374	24.3347	24.1321	NA	NA	NA	NA	NA	NA
P37840	Homo sapiens (Human)	Alpha-synuclein (Non-A beta component of AD amyloid) (Non-A4 component of amyloid precursor) (NACP)	SNCA NACP PARK1	Biotin (K)	0	1	1	GLSKAK	_GLSK(bi)AK_	10	NA	NA	NA	NA	NA	NA	NA	NA	NA	NA	NA	NA	NA	NA	NA	NA	NA	NA	NA
P37840	Homo sapiens (Human)	Alpha-synuclein (Non-A beta component of AD amyloid) (Non-A4 component of amyloid precursor) (NACP)	SNCA NACP PARK1	Acetyl (Protein N-term);Biotin (K)	0	1	1	MDVFMKGLSK	_(ac)MDVFM(ox)K(bi)GLSK_;_(ac)M(ox)DVFMK(bi)GLSK_;_(ac)M(ox)DVFMKGLSK(bi)_;_(ac)MDVFM(ox)K(bi)GLSK_;_(ac)MDVFM(ox)K(bi)GLSK_;_(ac)M(ox)DVFMK(bi)GLSK_;_(ac)MDVFM(ox)K(bi)GLSK_;_(ac)MDVFM(ox)K(bi)GLSK_;_(ac)M(ox)DVFMK(bi)GLSK_;_(ac)MDVFM(ox)K(bi)GLSK_;_(ac)M(ox)DVFMK(bi)GLSK_;_(ac)MDVFM(ox)K(bi)GLSK_;_(ac)M(ox)DVFMK(bi)GLSK_;_(ac)MDVFM(ox)K(bi)GLSK_;_(ac)M(ox)DVFMK(bi)GLSK_;_(ac)M(ox)DVFMKGLSK(bi)_…	6;10	NA	0.834904	0.0336405	0.0646811	0.642578	0.0610024	-0.196851	26.2749	26.4859	25.8233	26.6741	26.153	25.9511	24.4645	24.3329	23.5175	24.2134	24.1156	23.3952
P37840	Homo sapiens (Human)	Alpha-synuclein (Non-A beta component of AD amyloid) (Non-A4 component of amyloid precursor) (NACP)	SNCA NACP PARK1	Acetyl (Protein N-term);Biotin (K);Oxidation (M)	0	1	1	MDVFMKGLSK	_(ac)MDVFM(ox)K(bi)GLSK_;_(ac)M(ox)DVFMK(bi)GLSK_;_(ac)M(ox)DVFMKGLSK(bi)_;_(ac)MDVFM(ox)K(bi)GLSK_;_(ac)MDVFM(ox)K(bi)GLSK_;_(ac)M(ox)DVFMK(bi)GLSK_;_(ac)MDVFM(ox)K(bi)GLSK_;_(ac)MDVFM(ox)K(bi)GLSK_;_(ac)M(ox)DVFMK(bi)GLSK_;_(ac)MDVFM(ox)K(bi)GLSK_;_(ac)M(ox)DVFMK(bi)GLSK_;_(ac)MDVFM(ox)K(bi)GLSK_;_(ac)M(ox)DVFMK(bi)GLSK_;_(ac)MDVFM(ox)K(bi)GLSK_;_(ac)M(ox)DVFMK(bi)GLSK_;_(ac)M(ox)DVFMKGLSK(bi)_…	6;10	NA	0.519385	0.12667	0.275504	0.894626	0.0140419	0.120003	22.7293	23.5829	23.5952	23.678	23.979	23.0769	21.7223	20.5176	21.1199	20.7965	22.7502	20.1732
P37840	Homo sapiens (Human)	Alpha-synuclein (Non-A beta component of AD amyloid) (Non-A4 component of amyloid precursor) (NACP)	SNCA NACP PARK1	Biotin (K)	0	1	1	QGVAEAAGKTK	_QGVAEAAGK(bi)TK_;_QGVAEAAGK(bi)TK_;_QGVAEAAGKTK(bi)_;_QGVAEAAGK(bi)TK_;_QGVAEAAGK(bi)TK_;_QGVAEAAGK(bi)TK_;_QGVAEAAGK(bi)TK_;_QGVAEAAGK(bi)TK_;_QGVAEAAGK(bi)TK_;_QGVAEAAGK(bi)TK_;_QGVAEAAGK(bi)TK_;_QGVAEAAGK(bi)TK_;_QGVAEAAGK(bi)TK_;_QGVAEAAGKTK(bi)_;_QGVAEAAGK(bi)TK_;_QGVAEAAGKTK(bi)_;_QGVAEAAGK(bi)TK_;_QGVAEAAGK(bi)TK_;_QGVAEAAGK(bi)TK_;_QGVAEAAGK(bi)TK_;_QGVAEAAGK(bi)TK_;_QGVAEAAGK(bi)TK_;_QG…	32;34	NA	0.840562	0.0331368	0.0539578	0.937877	0.0109965	-0.0276647	28.6135	28.7106	28.1633	28.4616	28.9077	28.28	27.1778	27.837	27.0152	27.4558	27.6056	26.8856
P37840	Homo sapiens (Human)	Alpha-synuclein (Non-A beta component of AD amyloid) (Non-A4 component of amyloid precursor) (NACP)	SNCA NACP PARK1	2 Biotin (K)	0	2	2	QGVAEAAGKTKEGVLYVGSK	_QGVAEAAGKTK(bi)EGVLYVGSK_;_QGVAEAAGK(bi)TKEGVLYVGSK_;_QGVAEAAGK(bi)TKEGVLYVGSK_;_QGVAEAAGK(bi)TKEGVLYVGSK_;_QGVAEAAGKTK(bi)EGVLYVGSK_;_QGVAEAAGK(bi)TKEGVLYVGSK_;_QGVAEAAGK(bi)TKEGVLYVGSK_;_QGVAEAAGKTK(bi)EGVLYVGSK_;_QGVAEAAGK(bi)TKEGVLYVGSK_;_QGVAEAAGKTK(bi)EGVLYVGSK_;_QGVAEAAGK(bi)TKEGVLYVGSK_;_QGVAEAAGK(bi)TK(bi)EGVLYVGSK_;_QGVAEAAGK(bi)TK(bi)EGVLYVGSK_;_QGVAEAAGK(bi)TK(bi)EGVLYVGSK_;_QGVAEAAG…	34;32	NA	NA	NA	NA	NA	NA	NA	NA	NA	NA	NA	NA	NA	NA	NA	NA	NA	NA	NA
P37840	Homo sapiens (Human)	Alpha-synuclein (Non-A beta component of AD amyloid) (Non-A4 component of amyloid precursor) (NACP)	SNCA NACP PARK1	Biotin (K)	0	1	2	QGVAEAAGKTKEGVLYVGSK	_QGVAEAAGKTK(bi)EGVLYVGSK_;_QGVAEAAGK(bi)TKEGVLYVGSK_;_QGVAEAAGK(bi)TKEGVLYVGSK_;_QGVAEAAGK(bi)TKEGVLYVGSK_;_QGVAEAAGKTK(bi)EGVLYVGSK_;_QGVAEAAGK(bi)TKEGVLYVGSK_;_QGVAEAAGK(bi)TKEGVLYVGSK_;_QGVAEAAGKTK(bi)EGVLYVGSK_;_QGVAEAAGK(bi)TKEGVLYVGSK_;_QGVAEAAGKTK(bi)EGVLYVGSK_;_QGVAEAAGK(bi)TKEGVLYVGSK_;_QGVAEAAGK(bi)TK(bi)EGVLYVGSK_;_QGVAEAAGK(bi)TK(bi)EGVLYVGSK_;_QGVAEAAGK(bi)TK(bi)EGVLYVGSK_;_QGVAEAAG…	34;32	NA	0.132134	0.433495	3.45381	NA	NA	NA	26.3195	20.5999	23.4597	27.8894	27.4991	25.3521	NA	NA	NA	NA	NA	NA
P37840	Homo sapiens (Human)	Alpha-synuclein (Non-A beta component of AD amyloid) (Non-A4 component of amyloid precursor) (NACP)	SNCA NACP PARK1	2 Biotin (K)	0	2	3	QGVAEAAGKTKEGVLYVGSKTK	_QGVAEAAGK(bi)TKEGVLYVGSKTK(bi)_;_QGVAEAAGK(bi)TKEGVLYVGSKTK(bi)_;_QGVAEAAGK(bi)TKEGVLYVGSK(bi)TK_;_QGVAEAAGKTK(bi)EGVLYVGSKTK(bi)_;_QGVAEAAGK(bi)TKEGVLYVGSKTK(bi)_;_QGVAEAAGKTK(bi)EGVLYVGSKTK(bi)_;_QGVAEAAGK(bi)TKEGVLYVGSKTK(bi)_;_QGVAEAAGK(bi)TKEGVLYVGSKTK(bi)_;_QGVAEAAGK(bi)TKEGVLYVGSK(bi)TK_;_QGVAEAAGKTK(bi)EGVLYVGSK(bi)TK_;_QGVAEAAGK(bi)TKEGVLYVGSKTK(bi)_;_QGVAEAAGK(bi)TK(bi)EGVLYVGSKTK(bi)_	32;45;43;34	NA	0.0993578	0.497574	1.62057	NA	NA	NA	23.6353	23.6628	23.1818	25.715	25.9881	23.6384	NA	NA	NA	NA	NA	NA
P37840	Homo sapiens (Human)	Alpha-synuclein (Non-A beta component of AD amyloid) (Non-A4 component of amyloid precursor) (NACP)	SNCA NACP PARK1	Biotin (K)	0	1	1	TKEGVLYVGSK	_TK(bi)EGVLYVGSK_;_TK(bi)EGVLYVGSK_;_TK(bi)EGVLYVGSK_;_TK(bi)EGVLYVGSK_;_TK(bi)EGVLYVGSK_;_TK(bi)EGVLYVGSK_;_TK(bi)EGVLYVGSK_;_TK(bi)EGVLYVGSK_;_TK(bi)EGVLYVGSK_;_TK(bi)EGVLYVGSK_;_TK(bi)EGVLYVGSK_;_TK(bi)EGVLYVGSK_	34	NA	NA	NA	NA	0.491637	0.0928514	-0.273768	NA	NA	NA	NA	NA	NA	25.3852	25.7305	25.2179	25.5674	25.4273	24.5175
P37840	Homo sapiens (Human)	Alpha-synuclein (Non-A beta component of AD amyloid) (Non-A4 component of amyloid precursor) (NACP)	SNCA NACP PARK1	Biotin (K)	0	1	2	TKEGVLYVGSKTK	_TKEGVLYVGSK(bi)TK_;_TKEGVLYVGSK(bi)TK_;_TKEGVLYVGSK(bi)TK_;_TKEGVLYVGSKTK(bi)_;_TKEGVLYVGSK(bi)TK_;_TKEGVLYVGSK(bi)TK_;_TKEGVLYVGSK(bi)TK_;_TKEGVLYVGSK(bi)TK_;_TKEGVLYVGSK(bi)TK_;_TKEGVLYVGSK(bi)TK_;_TKEGVLYVGSKTK(bi)_;_TKEGVLYVGSK(bi)TK_;_TKEGVLYVGSKTK(bi)_;_TKEGVLYVGSK(bi)TK_;_TKEGVLYVGSKTK(bi)_;_TKEGVLYVGSK(bi)TK_;_TKEGVLYVGSK(bi)TK_;_TKEGVLYVGSK(bi)TK_;_TKEGVLYVGSK(bi)TK_;_TKEGVLYVGSK(bi)TK_…	43;45;34	NA	0.743965	0.0507279	0.119374	0.640797	0.0612227	-0.224978	30.3405	30.5604	29.861	30.5066	30.7624	29.851	28.6712	29.3242	28.2342	28.9852	28.6502	27.9193
P37840	Homo sapiens (Human)	Alpha-synuclein (Non-A beta component of AD amyloid) (Non-A4 component of amyloid precursor) (NACP)	SNCA NACP PARK1	2 Biotin (K)	0	2	2	TKEGVLYVGSKTK	_TKEGVLYVGSK(bi)TK_;_TKEGVLYVGSK(bi)TK_;_TKEGVLYVGSK(bi)TK_;_TKEGVLYVGSKTK(bi)_;_TKEGVLYVGSK(bi)TK_;_TKEGVLYVGSK(bi)TK_;_TKEGVLYVGSK(bi)TK_;_TKEGVLYVGSK(bi)TK_;_TKEGVLYVGSK(bi)TK_;_TKEGVLYVGSK(bi)TK_;_TKEGVLYVGSKTK(bi)_;_TKEGVLYVGSK(bi)TK_;_TKEGVLYVGSKTK(bi)_;_TKEGVLYVGSK(bi)TK_;_TKEGVLYVGSKTK(bi)_;_TKEGVLYVGSK(bi)TK_;_TKEGVLYVGSK(bi)TK_;_TKEGVLYVGSK(bi)TK_;_TKEGVLYVGSK(bi)TK_;_TKEGVLYVGSK(bi)TK_…	43;45;34	NA	0.365203	0.189366	0.242774	NA	NA	NA	24.4634	24.4152	24.0358	24.7284	24.7578	24.1565	NA	NA	NA	NA	NA	NA
P37840	Homo sapiens (Human)	Alpha-synuclein (Non-A beta component of AD amyloid) (Non-A4 component of amyloid precursor) (NACP)	SNCA NACP PARK1	2 Biotin (K)	0	2	3	TKEGVLYVGSKTKEGVVHGVATVAEK	_TKEGVLYVGSK(bi)TK(bi)EGVVHGVATVAEK_	43;45	NA	NA	NA	NA	NA	NA	NA	NA	NA	NA	NA	NA	NA	NA	NA	NA	NA	NA	NA
P37840	Homo sapiens (Human)	Alpha-synuclein (Non-A beta component of AD amyloid) (Non-A4 component of amyloid precursor) (NACP)	SNCA NACP PARK1	Biotin (K)	0	1	1	TKEGVVHGVATVAEK	_TK(bi)EGVVHGVATVAEK_;_TK(bi)EGVVHGVATVAEK_;_TK(bi)EGVVHGVATVAEK_;_TK(bi)EGVVHGVATVAEK_;_TK(bi)EGVVHGVATVAEK_;_TK(bi)EGVVHGVATVAEK_;_TK(bi)EGVVHGVATVAEK_;_TK(bi)EGVVHGVATVAEK_;_TK(bi)EGVVHGVATVAEK_;_TK(bi)EGVVHGVATVAEK_;_TK(bi)EGVVHGVATVAEK_;_TK(bi)EGVVHGVATVAEK_;_TK(bi)EGVVHGVATVAEK_;_TK(bi)EGVVHGVATVAEK_;_TK(bi)EGVVHGVATVAEK_;_TK(bi)EGVVHGVATVAEK_;_TK(bi)EGVVHGVATVAEK_;_TK(bi)EGVVHGVATVAEK_;_TK…	45	NA	0.809833	0.0405142	-0.0917189	0.63362	0.0612227	-0.193098	25.0581	24.9624	24.0729	24.6622	24.8687	24.2873	23.4845	23.7199	23.0745	23.7531	23.308	22.6384
P37840	Homo sapiens (Human)	Alpha-synuclein (Non-A beta component of AD amyloid) (Non-A4 component of amyloid precursor) (NACP)	SNCA NACP PARK1	Biotin (K)	0	1	2	TKEGVVHGVATVAEKTK	_TKEGVVHGVATVAEK(bi)TK_;_TK(bi)EGVVHGVATVAEKTK_;_TK(bi)EGVVHGVATVAEKTK_;_TK(bi)EGVVHGVATVAEKTK_	58;45	NA	NA	NA	NA	NA	NA	NA	NA	NA	NA	NA	NA	NA	NA	NA	NA	NA	NA	NA
P37840	Homo sapiens (Human)	Alpha-synuclein (Non-A beta component of AD amyloid) (Non-A4 component of amyloid precursor) (NACP)	SNCA NACP PARK1	Biotin (K)	0	1	1	TKEQVTNVGGAVVTGVTAVAQK	_TK(bi)EQVTNVGGAVVTGVTAVAQK_;_TK(bi)EQVTNVGGAVVTGVTAVAQK_;_TK(bi)EQVTNVGGAVVTGVTAVAQK_;_TK(bi)EQVTNVGGAVVTGVTAVAQK_;_TK(bi)EQVTNVGGAVVTGVTAVAQK_;_TK(bi)EQVTNVGGAVVTGVTAVAQK_;_TK(bi)EQVTNVGGAVVTGVTAVAQK_;_TK(bi)EQVTNVGGAVVTGVTAVAQK_;_TK(bi)EQVTNVGGAVVTGVTAVAQK_;_TK(bi)EQVTNVGGAVVTGVTAVAQK_;_TK(bi)EQVTNVGGAVVTGVTAVAQK_;_TK(bi)EQVTNVGGAVVTGVTAVAQK_;_TK(bi)EQVTNVGGAVVTGVTAVAQK_;_TK(bi)EQVTNVGGAVVTGVT…	60	NA	0.957246	0.0105411	0.0221611	0.22316	0.182026	-0.424704	22.8687	23.2843	22.0623	22.7011	23.0435	22.5372	22.1002	21.8706	21.9854	21.5283	22.0737	21.08
P37840	Homo sapiens (Human)	Alpha-synuclein (Non-A beta component of AD amyloid) (Non-A4 component of amyloid precursor) (NACP)	SNCA NACP PARK1	2 Biotin (K)	0	2	2	TKQGVAEAAGKTK	_TKQGVAEAAGK(bi)TK_;_TKQGVAEAAGK(bi)TK_;_TKQGVAEAAGK(bi)TK_;_TKQGVAEAAGK(bi)TK_;_TKQGVAEAAGK(bi)TK_;_TKQGVAEAAGK(bi)TK_;_TKQGVAEAAGK(bi)TK_;_TKQGVAEAAGK(bi)TK_;_TKQGVAEAAGK(bi)TK_;_TKQGVAEAAGK(bi)TK_;_TKQGVAEAAGK(bi)TK_;_TKQGVAEAAGK(bi)TK_;_TKQGVAEAAGK(bi)TK_;_TKQGVAEAAGK(bi)TK_;_TKQGVAEAAGK(bi)TK_;_TKQGVAEAAGK(bi)TK_;_TKQGVAEAAGK(bi)TK_;_TKQGVAEAAGK(bi)TK_;_TKQGVAEAAGK(bi)TK_;_TKQGVAEAAGK(bi)TK_…	32;23	NA	0.531457	0.121879	-0.0984256	NA	NA	NA	21.0047	21.0185	20.6425	20.8893	20.6444	20.8368	NA	NA	NA	NA	NA	NA
P37840	Homo sapiens (Human)	Alpha-synuclein (Non-A beta component of AD amyloid) (Non-A4 component of amyloid precursor) (NACP)	SNCA NACP PARK1	Biotin (K)	0	1	2	TKQGVAEAAGKTK	_TKQGVAEAAGK(bi)TK_;_TKQGVAEAAGK(bi)TK_;_TKQGVAEAAGK(bi)TK_;_TKQGVAEAAGK(bi)TK_;_TKQGVAEAAGK(bi)TK_;_TKQGVAEAAGK(bi)TK_;_TKQGVAEAAGK(bi)TK_;_TKQGVAEAAGK(bi)TK_;_TKQGVAEAAGK(bi)TK_;_TKQGVAEAAGK(bi)TK_;_TKQGVAEAAGK(bi)TK_;_TKQGVAEAAGK(bi)TK_;_TKQGVAEAAGK(bi)TK_;_TKQGVAEAAGK(bi)TK_;_TKQGVAEAAGK(bi)TK_;_TKQGVAEAAGK(bi)TK_;_TKQGVAEAAGK(bi)TK_;_TKQGVAEAAGK(bi)TK_;_TKQGVAEAAGK(bi)TK_;_TKQGVAEAAGK(bi)TK_…	32;23	NA	0.107304	0.483982	0.387338	0.953402	0.0109965	0.0216386	26.9572	27.3022	26.8323	27.1708	27.5492	27.5337	25.1383	26.0737	25.0152	25.5226	25.5328	25.2368
P37840	Homo sapiens (Human)	Alpha-synuclein (Non-A beta component of AD amyloid) (Non-A4 component of amyloid precursor) (NACP)	SNCA NACP PARK1	Biotin (K)	0	1	3	TKQGVAEAAGKTKEGVLYVGSK	_TKQGVAEAAGK(bi)TKEGVLYVGSK_;_TKQGVAEAAGK(bi)TKEGVLYVGSK_;_TKQGVAEAAGK(bi)TKEGVLYVGSK_;_TKQGVAEAAGKTK(bi)EGVLYVGSK_;_TKQGVAEAAGK(bi)TKEGVLYVGSK_;_TKQGVAEAAGK(bi)TKEGVLYVGSK_;_TKQGVAEAAGK(bi)TKEGVLYVGSK_;_TKQGVAEAAGK(bi)TKEGVLYVGSK_;_TKQGVAEAAGKTK(bi)EGVLYVGSK_;_TKQGVAEAAGKTK(bi)EGVLYVGSK_;_TKQGVAEAAGK(bi)TKEGVLYVGSK_;_TKQGVAEAAGK(bi)TKEGVLYVGSK_;_TKQGVAEAAGK(bi)TKEGVLYVGSK_;_TKQGVAEAAGK(bi)TKEGVL…	32;34	NA	0.0713207	0.567015	1.58528	NA	NA	NA	23.8577	24.0667	23.5183	26.0737	25.9845	24.1402	NA	NA	NA	NA	NA	NA
P37840	Homo sapiens (Human)	Alpha-synuclein (Non-A beta component of AD amyloid) (Non-A4 component of amyloid precursor) (NACP)	SNCA NACP PARK1	2 Biotin (K)	0	2	3	TKQGVAEAAGKTKEGVLYVGSK	_TKQGVAEAAGK(bi)TKEGVLYVGSK_;_TKQGVAEAAGK(bi)TKEGVLYVGSK_;_TKQGVAEAAGK(bi)TKEGVLYVGSK_;_TKQGVAEAAGKTK(bi)EGVLYVGSK_;_TKQGVAEAAGK(bi)TKEGVLYVGSK_;_TKQGVAEAAGK(bi)TKEGVLYVGSK_;_TKQGVAEAAGK(bi)TKEGVLYVGSK_;_TKQGVAEAAGK(bi)TKEGVLYVGSK_;_TKQGVAEAAGKTK(bi)EGVLYVGSK_;_TKQGVAEAAGKTK(bi)EGVLYVGSK_;_TKQGVAEAAGK(bi)TKEGVLYVGSK_;_TKQGVAEAAGK(bi)TKEGVLYVGSK_;_TKQGVAEAAGK(bi)TKEGVLYVGSK_;_TKQGVAEAAGK(bi)TKEGVL…	32;34	NA	NA	NA	NA	NA	NA	NA	NA	NA	NA	NA	NA	NA	NA	NA	NA	NA	NA	NA
P37840	Homo sapiens (Human)	Alpha-synuclein (Non-A beta component of AD amyloid) (Non-A4 component of amyloid precursor) (NACP)	SNCA NACP PARK1	Biotin (K)	0	1	1	TVEGAGSIAAATGFVKK	_TVEGAGSIAAATGFVKK(bi)_;_TVEGAGSIAAATGFVK(bi)K_;_TVEGAGSIAAATGFVK(bi)K_;_TVEGAGSIAAATGFVKK(bi)_;_TVEGAGSIAAATGFVKK(bi)_;_TVEGAGSIAAATGFVK(bi)K_	97;96	NA	0.112923	0.470843	-0.179642	NA	NA	NA	21.5306	21.3276	21.5224	21.1873	21.2647	21.3896	NA	NA	NA	NA	NA	NA
P46060	Homo sapiens (Human)	Ran GTPase-activating protein 1 (RanGAP1)	RANGAP1 KIAA1835 SD	Biotin (K)	0	1	1	GQGEKSATPSR	_GQGEK(bi)SATPSR_;_GQGEK(bi)SATPSR_;_GQGEK(bi)SATPSR_;_GQGEK(bi)SATPSR_;_GQGEK(bi)SATPSR_	406	NA	0.134754	0.427438	0.472811	NA	NA	NA	18.4115	18.8084	18.0145	18.6742	19.0218	18.9568	NA	NA	NA	NA	NA	NA
P46060	Homo sapiens (Human)	Ran GTPase-activating protein 1 (RanGAP1)	RANGAP1 KIAA1835 SD	Biotin (K)	0	1	2	GQGEKSATPSRK	_GQGEK(bi)SATPSRK_;_GQGEK(bi)SATPSRK_;_GQGEK(bi)SATPSRK_;_GQGEK(bi)SATPSRK_;_GQGEK(bi)SATPSRK_;_GQGEK(bi)SATPSRK_	406	NA	0.448387	0.153992	0.0889511	NA	NA	NA	19.7189	19.6859	20.0167	19.8711	19.9071	19.9102	NA	NA	NA	NA	NA	NA
P48426	Homo sapiens (Human)	Phosphatidylinositol 5-phosphate 4-kinase type-2 alpha (EC 2.7.1.149) (1-phosphatidylinositol 5-phosphate 4-kinase 2-alpha) (Diphosphoinositide kinase 2-alpha) (PIP5KIII) (Phosphatidylinositol 5-Phosphate 4-Kinase) (PI5P4Kalpha) (Phosphatidylinositol 5-phosphate 4-kinase type II alpha) (PI(5)P 4-kinase type II alpha) (PIP4KII-alpha) (PtdIns(4)P-5-kinase B isoform) (PtdIns(4)P-5-kinase C isoform) …	PIP4K2A PI5P4KA PIP5K2 PIP5K2A	Biotin (K)	0	1	1	AAHAAKTVK	_AAHAAK(bi)TVK_;_AAHAAK(bi)TVK_;_AAHAAK(bi)TVK_;_AAHAAK(bi)TVK_;_AAHAAK(bi)TVK_;_AAHAAK(bi)TVK_	375	NA	0.434019	0.160083	-0.218149	NA	NA	NA	19.9898	19.9683	20.1266	19.3389	19.9222	20.1692	NA	NA	NA	NA	NA	NA
P48426	Homo sapiens (Human)	Phosphatidylinositol 5-phosphate 4-kinase type-2 alpha (EC 2.7.1.149) (1-phosphatidylinositol 5-phosphate 4-kinase 2-alpha) (Diphosphoinositide kinase 2-alpha) (PIP5KIII) (Phosphatidylinositol 5-Phosphate 4-Kinase) (PI5P4Kalpha) (Phosphatidylinositol 5-phosphate 4-kinase type II alpha) (PI(5)P 4-kinase type II alpha) (PIP4KII-alpha) (PtdIns(4)P-5-kinase B isoform) (PtdIns(4)P-5-kinase C isoform) …	PIP4K2A PI5P4KA PIP5K2 PIP5K2A	2 Biotin (K)	0	2	3	AAHAAKTVKHGAGAEISTVNPEQYSKR	_AAHAAK(bi)TVK(bi)HGAGAEISTVNPEQYSKR_;_AAHAAK(bi)TVK(bi)HGAGAEISTVNPEQYSKR_;_AAHAAK(bi)TVK(bi)HGAGAEISTVNPEQYSKR_;_AAHAAK(bi)TVK(bi)HGAGAEISTVNPEQYSKR_;_AAHAAK(bi)TVK(bi)HGAGAEISTVNPEQYSKR_;_AAHAAK(bi)TVK(bi)HGAGAEISTVNPEQYSKR_;_AAHAAK(bi)TVK(bi)HGAGAEISTVNPEQYSKR_;_AAHAAK(bi)TVK(bi)HGAGAEISTVNPEQYSKR_;_AAHAAK(bi)TVK(bi)HGAGAEISTVNPEQYSKR_;_AAHAAK(bi)TVK(bi)HGAGAEISTVNPEQYSKR_;_AAHAAK(bi)TVK(bi)H…	375;378	NA	0.0909453	0.511452	-0.176932	NA	NA	NA	22.6932	22.6866	22.5722	22.3871	22.6112	22.4229	NA	NA	NA	NA	NA	NA
P48426	Homo sapiens (Human)	Phosphatidylinositol 5-phosphate 4-kinase type-2 alpha (EC 2.7.1.149) (1-phosphatidylinositol 5-phosphate 4-kinase 2-alpha) (Diphosphoinositide kinase 2-alpha) (PIP5KIII) (Phosphatidylinositol 5-Phosphate 4-Kinase) (PI5P4Kalpha) (Phosphatidylinositol 5-phosphate 4-kinase type II alpha) (PI(5)P 4-kinase type II alpha) (PIP4KII-alpha) (PtdIns(4)P-5-kinase B isoform) (PtdIns(4)P-5-kinase C isoform) …	PIP4K2A PI5P4KA PIP5K2 PIP5K2A	Biotin (K)	0	1	2	AKELPTLKDNDFINEGQK	_AKELPTLK(bi)DNDFINEGQK_;_AKELPTLK(bi)DNDFINEGQK_;_AK(bi)ELPTLKDNDFINEGQK_;_AKELPTLK(bi)DNDFINEGQK_;_AK(bi)ELPTLKDNDFINEGQK_;_AKELPTLK(bi)DNDFINEGQK_;_AK(bi)ELPTLKDNDFINEGQK_;_AKELPTLK(bi)DNDFINEGQK_;_AK(bi)ELPTLKDNDFINEGQK_;_AKELPTLK(bi)DNDFINEGQK_;_AK(bi)ELPTLKDNDFINEGQK_;_AKELPTLK(bi)DNDFINEGQK_;_AK(bi)ELPTLKDNDFINEGQK_;_AK(bi)ELPTLKDNDFINEGQK_	234;228	NA	0.589155	0.0999585	0.277788	NA	NA	NA	22.6216	23.5946	22.3074	22.5883	23.2758	23.4928	NA	NA	NA	NA	NA	NA
P48426	Homo sapiens (Human)	Phosphatidylinositol 5-phosphate 4-kinase type-2 alpha (EC 2.7.1.149) (1-phosphatidylinositol 5-phosphate 4-kinase 2-alpha) (Diphosphoinositide kinase 2-alpha) (PIP5KIII) (Phosphatidylinositol 5-Phosphate 4-Kinase) (PI5P4Kalpha) (Phosphatidylinositol 5-phosphate 4-kinase type II alpha) (PI(5)P 4-kinase type II alpha) (PIP4KII-alpha) (PtdIns(4)P-5-kinase B isoform) (PtdIns(4)P-5-kinase C isoform) …	PIP4K2A PI5P4KA PIP5K2 PIP5K2A	Acetyl (Protein N-term);Biotin (K)	0	1	1	ATPGNLGSSVLASKTK	_(ac)ATPGNLGSSVLASK(bi)TK_;_(ac)ATPGNLGSSVLASKTK(bi)_;_(ac)ATPGNLGSSVLASK(bi)TK_;_(ac)ATPGNLGSSVLASK(bi)TK_	15;17	NA	NA	NA	NA	NA	NA	NA	NA	NA	NA	NA	NA	NA	NA	NA	NA	NA	NA	NA
P48426	Homo sapiens (Human)	Phosphatidylinositol 5-phosphate 4-kinase type-2 alpha (EC 2.7.1.149) (1-phosphatidylinositol 5-phosphate 4-kinase 2-alpha) (Diphosphoinositide kinase 2-alpha) (PIP5KIII) (Phosphatidylinositol 5-Phosphate 4-Kinase) (PI5P4Kalpha) (Phosphatidylinositol 5-phosphate 4-kinase type II alpha) (PI(5)P 4-kinase type II alpha) (PIP4KII-alpha) (PtdIns(4)P-5-kinase B isoform) (PtdIns(4)P-5-kinase C isoform) …	PIP4K2A PI5P4KA PIP5K2 PIP5K2A	Biotin (K)	0	1	1	HFVAQKVK	_HFVAQK(bi)VK_;_HFVAQK(bi)VK_;_HFVAQK(bi)VK_;_HFVAQK(bi)VK_;_HFVAQK(bi)VK_;_HFVAQK(bi)VK_;_HFVAQK(bi)VK_;_HFVAQK(bi)VK_;_HFVAQK(bi)VK_;_HFVAQK(bi)VK_;_HFVAQK(bi)VK_;_HFVAQK(bi)VK_	27	NA	0.26758	0.267396	-0.224992	NA	NA	NA	21.909	22.2731	22.2243	21.6529	22.0931	21.9853	NA	NA	NA	NA	NA	NA
P48426	Homo sapiens (Human)	Phosphatidylinositol 5-phosphate 4-kinase type-2 alpha (EC 2.7.1.149) (1-phosphatidylinositol 5-phosphate 4-kinase 2-alpha) (Diphosphoinositide kinase 2-alpha) (PIP5KIII) (Phosphatidylinositol 5-Phosphate 4-Kinase) (PI5P4Kalpha) (Phosphatidylinositol 5-phosphate 4-kinase type II alpha) (PI(5)P 4-kinase type II alpha) (PIP4KII-alpha) (PtdIns(4)P-5-kinase B isoform) (PtdIns(4)P-5-kinase C isoform) …	PIP4K2A PI5P4KA PIP5K2 PIP5K2A	Biotin (K)	0	1	2	KAAHAAKTVK	_KAAHAAK(bi)TVK_;_KAAHAAK(bi)TVK_;_KAAHAAK(bi)TVK_	375	NA	NA	NA	NA	NA	NA	NA	NA	NA	NA	NA	NA	NA	NA	NA	NA	NA	NA	NA
P48426	Homo sapiens (Human)	Phosphatidylinositol 5-phosphate 4-kinase type-2 alpha (EC 2.7.1.149) (1-phosphatidylinositol 5-phosphate 4-kinase 2-alpha) (Diphosphoinositide kinase 2-alpha) (PIP5KIII) (Phosphatidylinositol 5-Phosphate 4-Kinase) (PI5P4Kalpha) (Phosphatidylinositol 5-phosphate 4-kinase type II alpha) (PI(5)P 4-kinase type II alpha) (PIP4KII-alpha) (PtdIns(4)P-5-kinase B isoform) (PtdIns(4)P-5-kinase C isoform) …	PIP4K2A PI5P4KA PIP5K2 PIP5K2A	Biotin (K)	0	1	2	KHFVAQKVK	_KHFVAQK(bi)VK_;_KHFVAQK(bi)VK_;_KHFVAQK(bi)VK_;_KHFVAQK(bi)VK_;_KHFVAQK(bi)VK_;_KHFVAQK(bi)VK_	27	NA	0.125467	0.441245	-0.259492	NA	NA	NA	19.5691	19.8093	19.8596	19.34	19.6776	19.4419	NA	NA	NA	NA	NA	NA
P48426	Homo sapiens (Human)	Phosphatidylinositol 5-phosphate 4-kinase type-2 alpha (EC 2.7.1.149) (1-phosphatidylinositol 5-phosphate 4-kinase 2-alpha) (Diphosphoinositide kinase 2-alpha) (PIP5KIII) (Phosphatidylinositol 5-Phosphate 4-Kinase) (PI5P4Kalpha) (Phosphatidylinositol 5-phosphate 4-kinase type II alpha) (PI(5)P 4-kinase type II alpha) (PIP4KII-alpha) (PtdIns(4)P-5-kinase B isoform) (PtdIns(4)P-5-kinase C isoform) …	PIP4K2A PI5P4KA PIP5K2 PIP5K2A	Biotin (K)	0	1	3	KKHFVAQKVK	_KKHFVAQK(bi)VK_;_KKHFVAQK(bi)VK_;_KKHFVAQK(bi)VK_;_KKHFVAQK(bi)VK_;_KKHFVAQK(bi)VK_;_KKHFVAQK(bi)VK_;_KKHFVAQK(bi)VK_	27	NA	0.507323	0.132022	-0.173262	NA	NA	NA	18.9454	19.5012	19.5589	18.8932	19.2597	19.3328	NA	NA	NA	NA	NA	NA
P48426	Homo sapiens (Human)	Phosphatidylinositol 5-phosphate 4-kinase type-2 alpha (EC 2.7.1.149) (1-phosphatidylinositol 5-phosphate 4-kinase 2-alpha) (Diphosphoinositide kinase 2-alpha) (PIP5KIII) (Phosphatidylinositol 5-Phosphate 4-Kinase) (PI5P4Kalpha) (Phosphatidylinositol 5-phosphate 4-kinase type II alpha) (PI(5)P 4-kinase type II alpha) (PIP4KII-alpha) (PtdIns(4)P-5-kinase B isoform) (PtdIns(4)P-5-kinase C isoform) …	PIP4K2A PI5P4KA PIP5K2 PIP5K2A	Biotin (K)	0	1	1	TVKHGAGAEISTVNPEQYSK	_TVK(bi)HGAGAEISTVNPEQYSK_;_TVK(bi)HGAGAEISTVNPEQYSK_;_TVK(bi)HGAGAEISTVNPEQYSK_;_TVK(bi)HGAGAEISTVNPEQYSK_;_TVK(bi)HGAGAEISTVNPEQYSK_;_TVK(bi)HGAGAEISTVNPEQYSK_;_TVK(bi)HGAGAEISTVNPEQYSK_;_TVK(bi)HGAGAEISTVNPEQYSK_;_TVK(bi)HGAGAEISTVNPEQYSK_;_TVK(bi)HGAGAEISTVNPEQYSK_;_TVK(bi)HGAGAEISTVNPEQYSK_;_TVK(bi)HGAGAEISTVNPEQYSK_;_TVK(bi)HGAGAEISTVNPEQYSK_	378	NA	0.010907	0.946719	-0.635826	0.00419919	0.989919	-0.804655	22.6232	22.7803	22.4447	21.7738	22.0868	22.0802	20.6886	20.6559	20.6723	19.6308	19.8676	20.1044
P48426	Homo sapiens (Human)	Phosphatidylinositol 5-phosphate 4-kinase type-2 alpha (EC 2.7.1.149) (1-phosphatidylinositol 5-phosphate 4-kinase 2-alpha) (Diphosphoinositide kinase 2-alpha) (PIP5KIII) (Phosphatidylinositol 5-Phosphate 4-Kinase) (PI5P4Kalpha) (Phosphatidylinositol 5-phosphate 4-kinase type II alpha) (PI(5)P 4-kinase type II alpha) (PIP4KII-alpha) (PtdIns(4)P-5-kinase B isoform) (PtdIns(4)P-5-kinase C isoform) …	PIP4K2A PI5P4KA PIP5K2 PIP5K2A	Biotin (K)	0	1	2	TVKHGAGAEISTVNPEQYSKR	_TVK(bi)HGAGAEISTVNPEQYSKR_;_TVK(bi)HGAGAEISTVNPEQYSKR_;_TVK(bi)HGAGAEISTVNPEQYSKR_;_TVK(bi)HGAGAEISTVNPEQYSKR_;_TVK(bi)HGAGAEISTVNPEQYSKR_;_TVK(bi)HGAGAEISTVNPEQYSKR_;_TVK(bi)HGAGAEISTVNPEQYSKR_;_TVK(bi)HGAGAEISTVNPEQYSKR_;_TVK(bi)HGAGAEISTVNPEQYSKR_;_TVK(bi)HGAGAEISTVNPEQYSKR_;_TVK(bi)HGAGAEISTVNPEQYSKR_;_TVK(bi)HGAGAEISTVNPEQYSKR_;_TVK(bi)HGAGAEISTVNPEQYSKR_;_TVK(bi)HGAGAEISTVNPEQYSKR_	378	NA	0.98608	0.00347027	-0.00425556	NA	NA	NA	24.6089	24.9025	24.574	24.7771	24.9936	24.302	NA	NA	NA	NA	NA	NA
P48729	Homo sapiens (Human)	Casein kinase I isoform alpha (CKI-alpha) (EC 2.7.11.1) (CK1)	CSNK1A1	Acetyl (Protein N-term);Biotin (K)	0	1	1	ASSSGSKAEFIVGGK	_(ac)ASSSGSK(bi)AEFIVGGK_;_(ac)ASSSGSK(bi)AEFIVGGK_;_(ac)ASSSGSK(bi)AEFIVGGK_;_(ac)ASSSGSK(bi)AEFIVGGK_;_(ac)ASSSGSK(bi)AEFIVGGK_;_(ac)ASSSGSK(bi)AEFIVGGK_;_(ac)ASSSGSK(bi)AEFIVGGK_;_(ac)ASSSGSK(bi)AEFIVGGK_;_(ac)ASSSGSK(bi)AEFIVGGK_;_(ac)ASSSGSK(bi)AEFIVGGK_;_(ac)ASSSGSK(bi)AEFIVGGK_;_(ac)ASSSGSK(bi)AEFIVGGK_;_(ac)ASSSGSK(bi)AEFIVGGK_;_(ac)ASSSGSK(bi)AEFIVGGK_;_(ac)ASSSGSK(bi)AEFIVGGK_;_(ac)ASSS…	8	NA	0.0949634	0.505626	0.391751	0.159474	0.231363	0.400152	22.3915	22.626	22.9716	22.9305	23.0984	23.1355	22.0156	22.3982	22.2611	22.2236	22.8791	22.7726
P49773	Homo sapiens (Human)	Histidine triad nucleotide-binding protein 1 (EC 3.-.-.-) (Adenosine 5'-monophosphoramidase) (Protein kinase C inhibitor 1) (Protein kinase C-interacting protein 1) (PKCI-1)	HINT1 HINT PKCI1 PRKCNH1	Acetyl (Protein N-term);Biotin (K)	0	1	2	ADEIAKAQVARPGGDTIFGK	_(ac)ADEIAK(bi)AQVARPGGDTIFGK_;_(ac)ADEIAK(bi)AQVARPGGDTIFGK_;_(ac)ADEIAK(bi)AQVARPGGDTIFGK_;_(ac)ADEIAK(bi)AQVARPGGDTIFGK_	7	NA	0.0188281	0.804995	-0.843036	NA	NA	NA	22.1642	22.328	22.0005	21.6669	21.3212	20.9755	NA	NA	NA	NA	NA	NA
P49959	Homo sapiens (Human)	Double-strand break repair protein MRE11 (EC 3.1.-.-) (Double-strand break repair protein MRE11A) (Meiotic recombination 11 homolog 1) (MRE11 homolog 1) (Meiotic recombination 11 homolog A) (MRE11 homolog A)	MRE11 HNGS1 MRE11A	Biotin (K)	0	1	2	LITKPSEGTTLRVEDLVK	_LITK(bi)PSEGTTLRVEDLVK_;_LITK(bi)PSEGTTLRVEDLVK_	420	NA	NA	NA	NA	NA	NA	NA	NA	NA	NA	NA	NA	NA	NA	NA	NA	NA	NA	NA
P49959	Homo sapiens (Human)	Double-strand break repair protein MRE11 (EC 3.1.-.-) (Double-strand break repair protein MRE11A) (Meiotic recombination 11 homolog 1) (MRE11 homolog 1) (Meiotic recombination 11 homolog A) (MRE11 homolog A)	MRE11 HNGS1 MRE11A	Biotin (K)	0	1	1	QYFQTAEKNVQLSLLTER	_QYFQTAEK(bi)NVQLSLLTER_;_QYFQTAEK(bi)NVQLSLLTER_;_QYFQTAEK(bi)NVQLSLLTER_;_QYFQTAEK(bi)NVQLSLLTER_;_QYFQTAEK(bi)NVQLSLLTER_;_QYFQTAEK(bi)NVQLSLLTER_;_QYFQTAEK(bi)NVQLSLLTER_;_QYFQTAEK(bi)NVQLSLLTER_;_QYFQTAEK(bi)NVQLSLLTER_;_QYFQTAEK(bi)NVQLSLLTER_;_QYFQTAEK(bi)NVQLSLLTER_;_QYFQTAEK(bi)NVQLSLLTER_	442	NA	NA	NA	NA	0.413742	0.110681	-0.346218	NA	NA	NA	NA	NA	NA	20.7221	21.1203	21.3208	20.0484	20.9204	21.1557
P50990	Homo sapiens (Human)	T-complex protein 1 subunit theta (TCP-1-theta) (CCT-theta) (Chaperonin containing T-complex polypeptide 1 subunit 8) (Renal carcinoma antigen NY-REN-15)	CCT8 C21orf112 CCTQ KIAA0002	Biotin (K)	0	1	1	GTVLIKTAEELMNFSK	_GTVLIK(bi)TAEELMNFSK_;_GTVLIK(bi)TAEELMNFSK_;_GTVLIK(bi)TAEELMNFSK_;_GTVLIK(bi)TAEELMNFSK_;_GTVLIK(bi)TAEELMNFSK_;_GTVLIK(bi)TAEELMNFSK_;_GTVLIK(bi)TAEELMNFSK_;_GTVLIK(bi)TAEELMNFSK_;_GTVLIK(bi)TAEELMNFSK_;_GTVLIK(bi)TAEELMNFSK_;_GTVLIK(bi)TAEELMNFSK_	260	NA	NA	NA	NA	0.55482	0.0747631	-0.151499	NA	NA	NA	NA	NA	NA	24.4577	23.9471	24.3248	23.7819	24.0917	24.4016
P50990	Homo sapiens (Human)	T-complex protein 1 subunit theta (TCP-1-theta) (CCT-theta) (Chaperonin containing T-complex polypeptide 1 subunit 8) (Renal carcinoma antigen NY-REN-15)	CCT8 C21orf112 CCTQ KIAA0002	Biotin (K);Oxidation (M)	0	1	2	GTVLIKTAEELMNFSKGEENLMDAQVK	_GTVLIK(bi)TAEELMNFSKGEENLM(ox)DAQVK_;_GTVLIK(bi)TAEELMNFSKGEENLM(ox)DAQVK_;_GTVLIK(bi)TAEELMNFSKGEENLM(ox)DAQVK_;_GTVLIK(bi)TAEELMNFSKGEENLMDAQVK_;_GTVLIK(bi)TAEELMNFSKGEENLMDAQVK_;_GTVLIK(bi)TAEELMNFSKGEENLMDAQVK_;_GTVLIK(bi)TAEELMNFSKGEENLMDAQVK_;_GTVLIK(bi)TAEELMNFSKGEENLMDAQVK_;_GTVLIK(bi)TAEELMNFSKGEENLMDAQVK_;_GTVLIK(bi)TAEELMNFSKGEENLMDAQVK_;_GTVLIK(bi)TAEELMNFSKGEENLMDAQVK_;_GTVLIK(bi)TA…	260	NA	NA	NA	NA	NA	NA	NA	NA	NA	NA	NA	NA	NA	NA	NA	NA	NA	NA	NA
P50990	Homo sapiens (Human)	T-complex protein 1 subunit theta (TCP-1-theta) (CCT-theta) (Chaperonin containing T-complex polypeptide 1 subunit 8) (Renal carcinoma antigen NY-REN-15)	CCT8 C21orf112 CCTQ KIAA0002	Biotin (K)	0	1	2	GTVLIKTAEELMNFSKGEENLMDAQVK	_GTVLIK(bi)TAEELMNFSKGEENLM(ox)DAQVK_;_GTVLIK(bi)TAEELMNFSKGEENLM(ox)DAQVK_;_GTVLIK(bi)TAEELMNFSKGEENLM(ox)DAQVK_;_GTVLIK(bi)TAEELMNFSKGEENLMDAQVK_;_GTVLIK(bi)TAEELMNFSKGEENLMDAQVK_;_GTVLIK(bi)TAEELMNFSKGEENLMDAQVK_;_GTVLIK(bi)TAEELMNFSKGEENLMDAQVK_;_GTVLIK(bi)TAEELMNFSKGEENLMDAQVK_;_GTVLIK(bi)TAEELMNFSKGEENLMDAQVK_;_GTVLIK(bi)TAEELMNFSKGEENLMDAQVK_;_GTVLIK(bi)TAEELMNFSKGEENLMDAQVK_;_GTVLIK(bi)TA…	260	NA	0.992512	0.00117174	0.00484806	0.0364414	0.528327	-0.660155	23.6967	25.1162	24.4064	23.9105	24.5369	24.7864	25.8064	25.8262	26.0317	24.8915	25.2061	25.5863
P50990	Homo sapiens (Human)	T-complex protein 1 subunit theta (TCP-1-theta) (CCT-theta) (Chaperonin containing T-complex polypeptide 1 subunit 8) (Renal carcinoma antigen NY-REN-15)	CCT8 C21orf112 CCTQ KIAA0002	Biotin (K)	0	1	1	IAVYSCPFDGMITETKGTVLIK	_IAVYSCPFDGMITETK(bi)GTVLIK_;_IAVYSCPFDGMITETK(bi)GTVLIK_;_IAVYSCPFDGMITETK(bi)GTVLIK_;_IAVYSCPFDGMITETK(bi)GTVLIK_;_IAVYSCPFDGMITETK(bi)GTVLIK_;_IAVYSCPFDGMITETK(bi)GTVLIK_;_IAVYSCPFDGMITETK(bi)GTVLIK_;_IAVYSCPFDGMITETK(bi)GTVLIK_	254	NA	NA	NA	NA	0.92357	0.0116434	-0.0396047	NA	NA	NA	NA	NA	NA	23.1672	23.2878	23.8394	22.782	23.4876	23.906
P52597	Homo sapiens (Human)	Heterogeneous nuclear ribonucleoprotein F (hnRNP F) (Nucleolin-like protein mcs94-1) [Cleaved into: Heterogeneous nuclear ribonucleoprotein F, N-terminally processed]	HNRNPF HNRPF	Biotin (K)	0	1	1	YIGIVKQAGLER	_YIGIVK(bi)QAGLER_;_YIGIVK(bi)QAGLER_;_YIGIVK(bi)QAGLER_;_YIGIVK(bi)QAGLER_;_YIGIVK(bi)QAGLER_;_YIGIVK(bi)QAGLER_;_YIGIVK(bi)QAGLER_;_YIGIVK(bi)QAGLER_;_YIGIVK(bi)QAGLER_;_YIGIVK(bi)QAGLER_;_YIGIVK(bi)QAGLER_;_YIGIVK(bi)QAGLER_	224	NA	0.896685	0.0237637	0.0391944	0.620639	0.0618347	0.108545	21.1723	21.7711	20.807	21.3476	21.2989	21.2215	21.4169	21.9034	21.5275	21.678	21.9856	21.5099
P54578	Homo sapiens (Human)	Ubiquitin carboxyl-terminal hydrolase 14 (EC 3.4.19.12) (Deubiquitinating enzyme 14) (Ubiquitin thioesterase 14) (Ubiquitin-specific-processing protease 14)	USP14 TGT	Acetyl (Protein N-term);Biotin (K)	0	1	1	PLYSVTVKWGK	_(ac)PLYSVTVK(bi)WGK_;_(ac)PLYSVTVK(bi)WGK_;_(ac)PLYSVTVK(bi)WGK_;_(ac)PLYSVTVK(bi)WGK_;_(ac)PLYSVTVK(bi)WGK_;_(ac)PLYSVTVK(bi)WGK_	9	NA	NA	NA	NA	0.276696	0.155148	-0.404351	NA	NA	NA	NA	NA	NA	21.744	22.4968	21.4668	21.5642	21.6148	21.3154
P55010	Homo sapiens (Human)	Eukaryotic translation initiation factor 5 (eIF-5)	EIF5	Biotin (K)	0	1	1	MDEISDHAKVLTLSDDLER	_MDEISDHAK(bi)VLTLSDDLER_;_MDEISDHAK(bi)VLTLSDDLER_;_MDEISDHAK(bi)VLTLSDDLER_;_MDEISDHAK(bi)VLTLSDDLER_;_MDEISDHAK(bi)VLTLSDDLER_;_MDEISDHAK(bi)VLTLSDDLER_;_MDEISDHAK(bi)VLTLSDDLER_;_M(ox)DEISDHAK(bi)VLTLSDDLER_;_M(ox)DEISDHAK(bi)VLTLSDDLER_;_M(ox)DEISDHAK(bi)VLTLSDDLER_;_M(ox)DEISDHAK(bi)VLTLSDDLER_;_M(ox)DEISDHAK(bi)VLTLSDDLER_	224	NA	0.315369	0.228646	-0.415699	NA	NA	NA	22.1369	21.9628	22.0498	21.0252	22.268	21.6092	NA	NA	NA	NA	NA	NA
P61326	Homo sapiens (Human)	Protein mago nashi homolog	MAGOH MAGOHA	Biotin (K)	0	1	2	YANNSNYKNDVMIRK	_YANNSNYK(bi)NDVMIRK_;_YANNSNYK(bi)NDVMIRK_;_YANNSNYK(bi)NDVMIRK_;_YANNSNYK(bi)NDVMIRK_;_YANNSNYK(bi)NDVMIRK_;_YANNSNYK(bi)NDVMIRK_	41	NA	0.371495	0.185753	0.216988	NA	NA	NA	21.197	20.6578	21.1946	21.4457	21.2244	21.0303	NA	NA	NA	NA	NA	NA
P62826	Homo sapiens (Human)	GTP-binding nuclear protein Ran (Androgen receptor-associated protein 24) (GTPase Ran) (Ras-like protein TC4) (Ras-related nuclear protein)	RAN ARA24 OK/SW-cl.81	Biotin (K)	0	1	1	AKSIVFHR	_AK(bi)SIVFHR_;_AK(bi)SIVFHR_;_AK(bi)SIVFHR_;_AK(bi)SIVFHR_;_AK(bi)SIVFHR_;_AK(bi)SIVFHR_	134	NA	0.0753035	0.54962	-0.440716	NA	NA	NA	20.0558	20.346	19.9546	19.4192	19.9106	19.7045	NA	NA	NA	NA	NA	NA
P62826	Homo sapiens (Human)	GTP-binding nuclear protein Ran (Androgen receptor-associated protein 24) (GTPase Ran) (Ras-like protein TC4) (Ras-related nuclear protein)	RAN ARA24 OK/SW-cl.81	Biotin (K)	0	1	2	LVLVGDGGTGKTTFVKR	_LVLVGDGGTGK(bi)TTFVKR_;_LVLVGDGGTGK(bi)TTFVKR_;_LVLVGDGGTGK(bi)TTFVKR_;_LVLVGDGGTGK(bi)TTFVKR_;_LVLVGDGGTGK(bi)TTFVKR_;_LVLVGDGGTGK(bi)TTFVKR_;_LVLVGDGGTGK(bi)TTFVKR_	23	NA	0.458517	0.150006	-0.396488	NA	NA	NA	21.2877	21.6522	22.6756	21.4754	21.9048	21.0459	NA	NA	NA	NA	NA	NA
P63027	Homo sapiens (Human)	Vesicle-associated membrane protein 2 (VAMP-2) (Synaptobrevin-2)	VAMP2 SYB2	Biotin (K)	0	1	1	VNVDKVLER	_VNVDK(bi)VLER_;_VNVDK(bi)VLER_;_VNVDK(bi)VLER_;_VNVDK(bi)VLER_;_VNVDK(bi)VLER_;_VNVDK(bi)VLER_	52	NA	0.768427	0.0447459	-0.112616	NA	NA	NA	20.9003	20.7074	21.4885	21.0276	20.4084	21.3224	NA	NA	NA	NA	NA	NA
P67809	Homo sapiens (Human)	Y-box-binding protein 1 (YB-1) (CCAAT-binding transcription factor I subunit A) (CBF-A) (DNA-binding protein B) (DBPB) (Enhancer factor I subunit A) (EFI-A) (Nuclease-sensitive element-binding protein 1) (Y-box transcription factor)	YBX1 NSEP1 YB1	Biotin (K)	0	1	1	VLGTVKWFNVR	_VLGTVK(bi)WFNVR_;_VLGTVK(bi)WFNVR_;_VLGTVK(bi)WFNVR_;_VLGTVK(bi)WFNVR_;_VLGTVK(bi)WFNVR_;_VLGTVK(bi)WFNVR_;_VLGTVK(bi)WFNVR_;_VLGTVK(bi)WFNVR_;_VLGTVK(bi)WFNVR_;_VLGTVK(bi)WFNVR_;_VLGTVK(bi)WFNVR_;_VLGTVK(bi)WFNVR_	64	NA	0.801174	0.0419315	-0.137896	0.333669	0.143109	-0.363365	21.6348	22.7762	21.8365	21.4626	22.6781	21.6931	22.3979	23.052	22.4003	21.9367	22.7448	22.0786
P68871	Homo sapiens (Human)	Hemoglobin subunit beta (Beta-globin) (Hemoglobin beta chain) [Cleaved into: LVV-hemorphin-7; Spinorphin]	HBB	Biotin (K)	0	1	1	FFESFGDLSTPDAVMGNPKVK	_FFESFGDLSTPDAVMGNPK(bi)VK_;_FFESFGDLSTPDAVMGNPKVK(bi)_;_FFESFGDLSTPDAVMGNPK(bi)VK_;_FFESFGDLSTPDAVM(ox)GNPKVK(bi)_	60;62	NA	NA	NA	NA	NA	NA	NA	NA	NA	NA	NA	NA	NA	NA	NA	NA	NA	NA	NA
P68871	Homo sapiens (Human)	Hemoglobin subunit beta (Beta-globin) (Hemoglobin beta chain) [Cleaved into: LVV-hemorphin-7; Spinorphin]	HBB	Biotin (K);Oxidation (M)	0	1	1	FFESFGDLSTPDAVMGNPKVK	_FFESFGDLSTPDAVMGNPK(bi)VK_;_FFESFGDLSTPDAVMGNPKVK(bi)_;_FFESFGDLSTPDAVMGNPK(bi)VK_;_FFESFGDLSTPDAVM(ox)GNPKVK(bi)_	60;62	NA	NA	NA	NA	NA	NA	NA	NA	NA	NA	NA	NA	NA	NA	NA	NA	NA	NA	NA
P68871	Homo sapiens (Human)	Hemoglobin subunit beta (Beta-globin) (Hemoglobin beta chain) [Cleaved into: LVV-hemorphin-7; Spinorphin]	HBB	Biotin (K)	0	1	3	KVLGAFSDGLAHLDNLKGTFATLSELHCDKLHVDPENFR	_KVLGAFSDGLAHLDNLK(bi)GTFATLSELHCDKLHVDPENFR_;_KVLGAFSDGLAHLDNLK(bi)GTFATLSELHCDKLHVDPENFR_;_KVLGAFSDGLAHLDNLK(bi)GTFATLSELHCDKLHVDPENFR_;_KVLGAFSDGLAHLDNLK(bi)GTFATLSELHCDKLHVDPENFR_;_KVLGAFSDGLAHLDNLK(bi)GTFATLSELHCDKLHVDPENFR_;_KVLGAFSDGLAHLDNLK(bi)GTFATLSELHCDKLHVDPENFR_;_KVLGAFSDGLAHLDNLK(bi)GTFATLSELHCDKLHVDPENFR_	83	NA	NA	NA	NA	NA	NA	NA	NA	NA	NA	NA	NA	NA	NA	NA	NA	NA	NA	NA
P68871	Homo sapiens (Human)	Hemoglobin subunit beta (Beta-globin) (Hemoglobin beta chain) [Cleaved into: LVV-hemorphin-7; Spinorphin]	HBB	Biotin (K)	0	1	1	SAVTALWGKVNVDEVGGEALGR	_SAVTALWGK(bi)VNVDEVGGEALGR_;_SAVTALWGK(bi)VNVDEVGGEALGR_;_SAVTALWGK(bi)VNVDEVGGEALGR_;_SAVTALWGK(bi)VNVDEVGGEALGR_;_SAVTALWGK(bi)VNVDEVGGEALGR_;_SAVTALWGK(bi)VNVDEVGGEALGR_	18	NA	NA	NA	NA	NA	NA	NA	NA	NA	NA	NA	NA	NA	NA	NA	NA	NA	NA	NA
P68871	Homo sapiens (Human)	Hemoglobin subunit beta (Beta-globin) (Hemoglobin beta chain) [Cleaved into: LVV-hemorphin-7; Spinorphin]	HBB	Biotin (K)	0	1	1	VHLTPEEKSAVTALWGK	_VHLTPEEK(bi)SAVTALWGK_;_VHLTPEEK(bi)SAVTALWGK_;_VHLTPEEK(bi)SAVTALWGK_;_VHLTPEEK(bi)SAVTALWGK_;_VHLTPEEK(bi)SAVTALWGK_;_VHLTPEEK(bi)SAVTALWGK_;_VHLTPEEK(bi)SAVTALWGK_;_VHLTPEEK(bi)SAVTALWGK_;_VHLTPEEK(bi)SAVTALWGK_;_VHLTPEEK(bi)SAVTALWGK_;_VHLTPEEK(bi)SAVTALWGK_;_VHLTPEEK(bi)SAVTALWGK_;_VHLTPEEK(bi)SAVTALWGK_;_VHLTPEEK(bi)SAVTALWGK_;_VHLTPEEK(bi)SAVTALWGK_;_VHLTPEEK(bi)SAVTALWGK_	9	NA	0.341928	0.207274	-0.303348	0.319652	0.143109	-0.337961	24.0345	24.1561	23.3631	23.5479	23.7832	23.3126	22.0661	22.4219	22.7351	21.728	21.9835	22.4979
P68871	Homo sapiens (Human)	Hemoglobin subunit beta (Beta-globin) (Hemoglobin beta chain) [Cleaved into: LVV-hemorphin-7; Spinorphin]	HBB	Biotin (K)	0	1	2	VLGAFSDGLAHLDNLKGTFATLSELHCDKLHVDPENFR	_VLGAFSDGLAHLDNLK(bi)GTFATLSELHCDKLHVDPENFR_;_VLGAFSDGLAHLDNLK(bi)GTFATLSELHCDKLHVDPENFR_;_VLGAFSDGLAHLDNLK(bi)GTFATLSELHCDKLHVDPENFR_;_VLGAFSDGLAHLDNLK(bi)GTFATLSELHCDKLHVDPENFR_;_VLGAFSDGLAHLDNLK(bi)GTFATLSELHCDKLHVDPENFR_;_VLGAFSDGLAHLDNLK(bi)GTFATLSELHCDKLHVDPENFR_	83	NA	0.232726	0.298419	-0.1628	NA	NA	NA	23.7841	23.9624	23.8732	23.8903	23.7104	23.5306	NA	NA	NA	NA	NA	NA
P68871	Homo sapiens (Human)	Hemoglobin subunit beta (Beta-globin) (Hemoglobin beta chain) [Cleaved into: LVV-hemorphin-7; Spinorphin]	HBB	Biotin (K)	0	1	1	VVAGVANALAHKYH	_VVAGVANALAHK(bi)YH_;_VVAGVANALAHK(bi)YH_;_VVAGVANALAHK(bi)YH_;_VVAGVANALAHK(bi)YH_;_VVAGVANALAHK(bi)YH_;_VVAGVANALAHK(bi)YH_;_VVAGVANALAHK(bi)YH_;_VVAGVANALAHK(bi)YH_;_VVAGVANALAHK(bi)YH_;_VVAGVANALAHK(bi)YH_;_VVAGVANALAHK(bi)YH_;_VVAGVANALAHK(bi)YH_;_VVAGVANALAHK(bi)YH_;_VVAGVANALAHK(bi)YH_;_VVAGVANALAHK(bi)YH_;_VVAGVANALAHK(bi)YH_;_VVAGVANALAHK(bi)YH_;_VVAGVANALAHK(bi)YH_;_VVAGVANALAHK(bi)YH_;…	145	NA	0.654831	0.0784913	0.0715378	0.0514609	0.461332	-0.354038	26.3675	26.1202	25.9749	26.3912	26.2211	26.065	24.8812	25.1466	24.9524	24.8286	24.481	24.6085
P69905	Homo sapiens (Human)	Hemoglobin subunit alpha (Alpha-globin) (Hemoglobin alpha chain)	HBA1; HBA2	Biotin (K)	0	1	1	AAWGKVGAHAGEYGAEALER	_AAWGK(bi)VGAHAGEYGAEALER_;_AAWGK(bi)VGAHAGEYGAEALER_;_AAWGK(bi)VGAHAGEYGAEALER_;_AAWGK(bi)VGAHAGEYGAEALER_;_AAWGK(bi)VGAHAGEYGAEALER_;_AAWGK(bi)VGAHAGEYGAEALER_;_AAWGK(bi)VGAHAGEYGAEALER_;_AAWGK(bi)VGAHAGEYGAEALER_;_AAWGK(bi)VGAHAGEYGAEALER_;_AAWGK(bi)VGAHAGEYGAEALER_;_AAWGK(bi)VGAHAGEYGAEALER_;_AAWGK(bi)VGAHAGEYGAEALER_;_AAWGK(bi)VGAHAGEYGAEALER_;_AAWGK(bi)VGAHAGEYGAEALER_;_AAWGK(bi)VGAHAGEYGAE…	17	NA	0.479719	0.140867	-0.0858889	0.142554	0.247832	-0.473505	24.3659	24.6572	24.5478	24.4524	24.5517	24.3093	22.5904	23.0384	22.7935	22.0812	22.1372	22.7834
P69905	Homo sapiens (Human)	Hemoglobin subunit alpha (Alpha-globin) (Hemoglobin alpha chain)	HBA1; HBA2	Biotin (K)	0	1	1	FLASVSTVLTSKYR	_FLASVSTVLTSK(bi)YR_;_FLASVSTVLTSK(bi)YR_	140	NA	NA	NA	NA	NA	NA	NA	NA	NA	NA	NA	NA	NA	NA	NA	NA	NA	NA	NA
P69905	Homo sapiens (Human)	Hemoglobin subunit alpha (Alpha-globin) (Hemoglobin alpha chain)	HBA1; HBA2	Biotin (K)	0	1	1	TNVKAAWGK	_TNVK(bi)AAWGK_;_TNVK(bi)AAWGK_;_TNVK(bi)AAWGK_;_TNVK(bi)AAWGK_;_TNVK(bi)AAWGK_;_TNVK(bi)AAWGK_;_TNVK(bi)AAWGK_;_TNVK(bi)AAWGK_;_TNVK(bi)AAWGK_;_TNVK(bi)AAWGK_	12	NA	0.0429424	0.667948	-0.482246	NA	NA	NA	22.2245	22.4378	22.4904	21.7159	21.8063	22.1838	NA	NA	NA	NA	NA	NA
P69905	Homo sapiens (Human)	Hemoglobin subunit alpha (Alpha-globin) (Hemoglobin alpha chain)	HBA1; HBA2	Biotin (K)	0	1	1	VADALTNAVAHVDDMPNALSALSDLHAHKLR	_VADALTNAVAHVDDMPNALSALSDLHAHK(bi)LR_;_VADALTNAVAHVDDMPNALSALSDLHAHK(bi)LR_;_VADALTNAVAHVDDMPNALSALSDLHAHK(bi)LR_	91	NA	NA	NA	NA	NA	NA	NA	NA	NA	NA	NA	NA	NA	NA	NA	NA	NA	NA	NA
P69905	Homo sapiens (Human)	Hemoglobin subunit alpha (Alpha-globin) (Hemoglobin alpha chain)	HBA1; HBA2	Biotin (K)	0	1	1	VLSPADKTNVK	_VLSPADK(bi)TNVK_;_VLSPADK(bi)TNVK_;_VLSPADK(bi)TNVK_;_VLSPADK(bi)TNVK_;_VLSPADK(bi)TNVK_;_VLSPADK(bi)TNVK_;_VLSPADK(bi)TNVK_;_VLSPADK(bi)TNVK_;_VLSPADK(bi)TNVK_;_VLSPADK(bi)TNVK_;_VLSPADK(bi)TNVK_;_VLSPADK(bi)TNVK_;_VLSPADK(bi)TNVK_;_VLSPADK(bi)TNVK_;_VLSPADK(bi)TNVK_;_VLSPADK(bi)TNVK_;_VLSPADK(bi)TNVK_;_VLSPADKTNVK(bi)_;_VLSPADK(bi)TNVK_;_VLSPADK(bi)TNVK_;_VLSPADK(bi)TNVK_;_VLSPADK(bi)TNVK_;_VL…	8;12	NA	0.483772	0.139409	-0.0847722	0.162939	0.227552	-0.376611	27.0385	26.8931	27.0806	26.8852	27.0967	26.7759	23.8037	24.4501	24.4279	23.9518	23.7396	23.8604
P69905	Homo sapiens (Human)	Hemoglobin subunit alpha (Alpha-globin) (Hemoglobin alpha chain)	HBA1; HBA2	Biotin (K)	0	1	2	VLSPADKTNVKAAWGK	_VLSPADKTNVK(bi)AAWGK_;_VLSPADKTNVK(bi)AAWGK_;_VLSPADKTNVK(bi)AAWGK_;_VLSPADKTNVK(bi)AAWGK_;_VLSPADKTNVK(bi)AAWGK_;_VLSPADKTNVK(bi)AAWGK_;_VLSPADKTNVK(bi)AAWGK_;_VLSPADKTNVK(bi)AAWGK_;_VLSPADKTNVK(bi)AAWGK_;_VLSPADKTNVK(bi)AAWGK_;_VLSPADKTNVK(bi)AAWGK_;_VLSPADKTNVK(bi)AAWGK_;_VLSPADKTNVK(bi)AAWGK_;_VLSPADKTNVK(bi)AAWGK_;_VLSPADKTNVK(bi)AAWGK_;_VLSPADKTNVK(bi)AAWGK_;_VLSPADKTNVK(bi)AAWGK_;_VLSPADK…	12	NA	0.831559	0.0349703	-0.0664822	NA	NA	NA	28.6366	27.9224	28.2265	27.9761	28.6096	28.0002	NA	NA	NA	NA	NA	NA
P78318	Homo sapiens (Human)	Immunoglobulin-binding protein 1 (B-cell signal transduction molecule alpha 4) (Protein alpha-4) (CD79a-binding protein 1) (Protein phosphatase 2/4/6 regulatory subunit) (Renal carcinoma antigen NY-REN-16)	IGBP1 IBP1	Biotin (K)	0	1	2	QERPPVKPFILTR	_QERPPVK(bi)PFILTR_;_QERPPVK(bi)PFILTR_;_QERPPVK(bi)PFILTR_;_QERPPVK(bi)PFILTR_;_QERPPVK(bi)PFILTR_;_QERPPVK(bi)PFILTR_;_QERPPVK(bi)PFILTR_;_QERPPVK(bi)PFILTR_;_QERPPVK(bi)PFILTR_;_QERPPVK(bi)PFILTR_;_QERPPVK(bi)PFILTR_;_QERPPVK(bi)PFILTR_;_QERPPVK(bi)PFILTR_;_QERPPVK(bi)PFILTR_;_QERPPVK(bi)PFILTR_;_QERPPVK(bi)PFILTR_	241	NA	0.856869	0.0321309	-0.0491989	0.747217	0.0432505	-0.0591847	23.5928	23.5108	23.6524	23.5111	23.1118	23.9855	23.4442	23.8183	23.7849	23.534	23.8661	23.4699
P78356	Homo sapiens (Human)	Phosphatidylinositol 5-phosphate 4-kinase type-2 beta (EC 2.7.1.149) (1-phosphatidylinositol 5-phosphate 4-kinase 2-beta) (Diphosphoinositide kinase 2-beta) (Phosphatidylinositol 5-phosphate 4-kinase type II beta) (PI(5)P 4-kinase type II beta) (PIP4KII-beta) (PtdIns(5)P-4-kinase isoform 2-beta)	PIP4K2B PIP5K2B	Biotin (K)	0	1	1	AAHAAKTVK	_AAHAAK(bi)TVK_;_AAHAAK(bi)TVK_;_AAHAAK(bi)TVK_;_AAHAAK(bi)TVK_;_AAHAAK(bi)TVK_;_AAHAAK(bi)TVK_	385	NA	0.434019	0.160083	-0.218149	NA	NA	NA	19.9898	19.9683	20.1266	19.3389	19.9222	20.1692	NA	NA	NA	NA	NA	NA
P78356	Homo sapiens (Human)	Phosphatidylinositol 5-phosphate 4-kinase type-2 beta (EC 2.7.1.149) (1-phosphatidylinositol 5-phosphate 4-kinase 2-beta) (Diphosphoinositide kinase 2-beta) (Phosphatidylinositol 5-phosphate 4-kinase type II beta) (PI(5)P 4-kinase type II beta) (PIP4KII-beta) (PtdIns(5)P-4-kinase isoform 2-beta)	PIP4K2B PIP5K2B	2 Biotin (K)	0	2	3	AAHAAKTVKHGAGAEISTVNPEQYSKR	_AAHAAK(bi)TVK(bi)HGAGAEISTVNPEQYSKR_;_AAHAAK(bi)TVK(bi)HGAGAEISTVNPEQYSKR_;_AAHAAK(bi)TVK(bi)HGAGAEISTVNPEQYSKR_;_AAHAAK(bi)TVK(bi)HGAGAEISTVNPEQYSKR_;_AAHAAK(bi)TVK(bi)HGAGAEISTVNPEQYSKR_;_AAHAAK(bi)TVK(bi)HGAGAEISTVNPEQYSKR_;_AAHAAK(bi)TVK(bi)HGAGAEISTVNPEQYSKR_;_AAHAAK(bi)TVK(bi)HGAGAEISTVNPEQYSKR_;_AAHAAK(bi)TVK(bi)HGAGAEISTVNPEQYSKR_;_AAHAAK(bi)TVK(bi)HGAGAEISTVNPEQYSKR_;_AAHAAK(bi)TVK(bi)H…	385;388	NA	0.0909453	0.511452	-0.176932	NA	NA	NA	22.6932	22.6866	22.5722	22.3871	22.6112	22.4229	NA	NA	NA	NA	NA	NA
P78356	Homo sapiens (Human)	Phosphatidylinositol 5-phosphate 4-kinase type-2 beta (EC 2.7.1.149) (1-phosphatidylinositol 5-phosphate 4-kinase 2-beta) (Diphosphoinositide kinase 2-beta) (Phosphatidylinositol 5-phosphate 4-kinase type II beta) (PI(5)P 4-kinase type II beta) (PIP4KII-beta) (PtdIns(5)P-4-kinase isoform 2-beta)	PIP4K2B PIP5K2B	Biotin (K)	0	1	2	KAAHAAKTVK	_KAAHAAK(bi)TVK_;_KAAHAAK(bi)TVK_;_KAAHAAK(bi)TVK_	385	NA	NA	NA	NA	NA	NA	NA	NA	NA	NA	NA	NA	NA	NA	NA	NA	NA	NA	NA
P78356	Homo sapiens (Human)	Phosphatidylinositol 5-phosphate 4-kinase type-2 beta (EC 2.7.1.149) (1-phosphatidylinositol 5-phosphate 4-kinase 2-beta) (Diphosphoinositide kinase 2-beta) (Phosphatidylinositol 5-phosphate 4-kinase type II beta) (PI(5)P 4-kinase type II beta) (PIP4KII-beta) (PtdIns(5)P-4-kinase isoform 2-beta)	PIP4K2B PIP5K2B	Biotin (K)	0	1	1	TVKHGAGAEISTVNPEQYSK	_TVK(bi)HGAGAEISTVNPEQYSK_;_TVK(bi)HGAGAEISTVNPEQYSK_;_TVK(bi)HGAGAEISTVNPEQYSK_;_TVK(bi)HGAGAEISTVNPEQYSK_;_TVK(bi)HGAGAEISTVNPEQYSK_;_TVK(bi)HGAGAEISTVNPEQYSK_;_TVK(bi)HGAGAEISTVNPEQYSK_;_TVK(bi)HGAGAEISTVNPEQYSK_;_TVK(bi)HGAGAEISTVNPEQYSK_;_TVK(bi)HGAGAEISTVNPEQYSK_;_TVK(bi)HGAGAEISTVNPEQYSK_;_TVK(bi)HGAGAEISTVNPEQYSK_;_TVK(bi)HGAGAEISTVNPEQYSK_	388	NA	0.010907	0.946719	-0.635826	0.00419919	0.989919	-0.804655	22.6232	22.7803	22.4447	21.7738	22.0868	22.0802	20.6886	20.6559	20.6723	19.6308	19.8676	20.1044
P78356	Homo sapiens (Human)	Phosphatidylinositol 5-phosphate 4-kinase type-2 beta (EC 2.7.1.149) (1-phosphatidylinositol 5-phosphate 4-kinase 2-beta) (Diphosphoinositide kinase 2-beta) (Phosphatidylinositol 5-phosphate 4-kinase type II beta) (PI(5)P 4-kinase type II beta) (PIP4KII-beta) (PtdIns(5)P-4-kinase isoform 2-beta)	PIP4K2B PIP5K2B	Biotin (K)	0	1	2	TVKHGAGAEISTVNPEQYSKR	_TVK(bi)HGAGAEISTVNPEQYSKR_;_TVK(bi)HGAGAEISTVNPEQYSKR_;_TVK(bi)HGAGAEISTVNPEQYSKR_;_TVK(bi)HGAGAEISTVNPEQYSKR_;_TVK(bi)HGAGAEISTVNPEQYSKR_;_TVK(bi)HGAGAEISTVNPEQYSKR_;_TVK(bi)HGAGAEISTVNPEQYSKR_;_TVK(bi)HGAGAEISTVNPEQYSKR_;_TVK(bi)HGAGAEISTVNPEQYSKR_;_TVK(bi)HGAGAEISTVNPEQYSKR_;_TVK(bi)HGAGAEISTVNPEQYSKR_;_TVK(bi)HGAGAEISTVNPEQYSKR_;_TVK(bi)HGAGAEISTVNPEQYSKR_;_TVK(bi)HGAGAEISTVNPEQYSKR_	388	NA	0.98608	0.00347027	-0.00425556	NA	NA	NA	24.6089	24.9025	24.574	24.7771	24.9936	24.302	NA	NA	NA	NA	NA	NA
P78417	Homo sapiens (Human)	Glutathione S-transferase omega-1 (GSTO-1) (EC 2.5.1.18) (Glutathione S-transferase omega 1-1) (GSTO 1-1) (Glutathione-dependent dehydroascorbate reductase) (EC 1.8.5.1) (Monomethylarsonic acid reductase) (MMA(V) reductase) (EC 1.20.4.2) (S-(Phenacyl)glutathione reductase) (SPG-R)	GSTO1 GSTTLP28	Biotin (K)	0	1	3	SQNKEDYAGLKEEFRK	_SQNK(bi)EDYAGLKEEFRK_;_SQNK(bi)EDYAGLKEEFRK_;_SQNK(bi)EDYAGLKEEFRK_;_SQNK(bi)EDYAGLKEEFRK_	136	NA	0.179769	0.35198	-0.54325	NA	NA	NA	20.1652	20.985	20.5751	19.6222	20.0318	20.4415	NA	NA	NA	NA	NA	NA
PF3D7_0102200	Plasmodium falciparum 3D7	ring-infected erythrocyte surface antigen	RESA	Biotin (K)	0	1	1	AAKAAEAEMK	_AAK(bi)AAEAEMK_;_AAK(bi)AAEAEMK_;_AAK(bi)AAEAEMK_	320	NA	NA	NA	NA	NA	NA	NA	NA	NA	NA	NA	NA	NA	NA	NA	NA	NA	NA	NA
PF3D7_0102200	Plasmodium falciparum 3D7	ring-infected erythrocyte surface antigen	RESA	Biotin (K)	0	1	1	HINELKSLEHR	_HINELK(bi)SLEHR_;_HINELK(bi)SLEHR_;_HINELK(bi)SLEHR_;_HINELK(bi)SLEHR_;_HINELK(bi)SLEHR_;_HINELK(bi)SLEHR_;_HINELK(bi)SLEHR_;_HINELK(bi)SLEHR_;_HINELK(bi)SLEHR_;_HINELK(bi)SLEHR_;_HINELK(bi)SLEHR_;_HINELK(bi)SLEHR_;_HINELK(bi)SLEHR_;_HINELK(bi)SLEHR_;_HINELK(bi)SLEHR_;_HINELK(bi)SLEHR_;_HINELK(bi)SLEHR_;_HINELK(bi)SLEHR_;_HINELK(bi)SLEHR_;_HINELK(bi)SLEHR_;_HINELK(bi)SLEHR_;_HINELK(bi)SLEHR_;_HI…	312	NA	0.128419	0.437827	3.23356	0.73016	0.0434872	0.0357753	26.5629	21.9201	21.1922	26.3298	26.2442	26.8019	27.4728	27.4653	27.3883	27.6503	27.3319	27.4516
PF3D7_0102200	Plasmodium falciparum 3D7	ring-infected erythrocyte surface antigen	RESA	Biotin (K)	0	1	2	IMNSDISSFKHINELKSLEHR	_IMNSDISSFKHINELK(bi)SLEHR_;_IMNSDISSFKHINELK(bi)SLEHR_;_IMNSDISSFKHINELK(bi)SLEHR_;_IMNSDISSFKHINELK(bi)SLEHR_;_IMNSDISSFKHINELK(bi)SLEHR_;_IMNSDISSFKHINELK(bi)SLEHR_;_IMNSDISSFKHINELK(bi)SLEHR_;_IMNSDISSFKHINELK(bi)SLEHR_;_IMNSDISSFKHINELK(bi)SLEHR_;_IMNSDISSFKHINELK(bi)SLEHR_;_IMNSDISSFKHINELK(bi)SLEHR_;_IMNSDISSFKHINELK(bi)SLEHR_;_IMNSDISSFKHINELK(bi)SLEHR_;_IMNSDISSFKHINELK(bi)SLEHR_;_IMNSDI…	312	NA	0.162676	0.379405	0.344344	NA	NA	NA	24.5928	24.2843	24.0105	24.7208	24.779	24.4208	NA	NA	NA	NA	NA	NA
PF3D7_0102200	Plasmodium falciparum 3D7	ring-infected erythrocyte surface antigen	RESA	Biotin (K);Oxidation (M)	0	1	2	IMNSDISSFKHINELKSLEHR	_IMNSDISSFKHINELK(bi)SLEHR_;_IMNSDISSFKHINELK(bi)SLEHR_;_IMNSDISSFKHINELK(bi)SLEHR_;_IMNSDISSFKHINELK(bi)SLEHR_;_IMNSDISSFKHINELK(bi)SLEHR_;_IMNSDISSFKHINELK(bi)SLEHR_;_IMNSDISSFKHINELK(bi)SLEHR_;_IMNSDISSFKHINELK(bi)SLEHR_;_IMNSDISSFKHINELK(bi)SLEHR_;_IMNSDISSFKHINELK(bi)SLEHR_;_IMNSDISSFKHINELK(bi)SLEHR_;_IMNSDISSFKHINELK(bi)SLEHR_;_IMNSDISSFKHINELK(bi)SLEHR_;_IMNSDISSFKHINELK(bi)SLEHR_;_IMNSDI…	312	NA	0.232378	0.298419	0.189891	NA	NA	NA	22.1736	22.1379	22.2093	22.6304	22.2285	22.2316	NA	NA	NA	NA	NA	NA
PF3D7_0102200	Plasmodium falciparum 3D7	ring-infected erythrocyte surface antigen	RESA	Biotin (K);Oxidation (M)	0	1	3	KIMNSDISSFKHINELKSLEHR	_KIMNSDISSFKHINELK(bi)SLEHR_;_KIMNSDISSFKHINELK(bi)SLEHR_;_KIMNSDISSFKHINELK(bi)SLEHR_;_KIMNSDISSFKHINELK(bi)SLEHR_;_KIMNSDISSFKHINELK(bi)SLEHR_;_KIMNSDISSFKHINELK(bi)SLEHR_;_KIMNSDISSFKHINELK(bi)SLEHR_;_KIMNSDISSFKHINELK(bi)SLEHR_;_KIMNSDISSFKHINELK(bi)SLEHR_;_KIMNSDISSFKHINELK(bi)SLEHR_;_KIMNSDISSFKHINELK(bi)SLEHR_;_KIMNSDISSFKHINELK(bi)SLEHR_;_KIM(ox)NSDISSFKHINELK(bi)SLEHR_;_KIM(ox)NSDISSFKHI…	312	NA	NA	NA	NA	NA	NA	NA	NA	NA	NA	NA	NA	NA	NA	NA	NA	NA	NA	NA
PF3D7_0102200	Plasmodium falciparum 3D7	ring-infected erythrocyte surface antigen	RESA	Biotin (K)	0	1	3	KIMNSDISSFKHINELKSLEHR	_KIMNSDISSFKHINELK(bi)SLEHR_;_KIMNSDISSFKHINELK(bi)SLEHR_;_KIMNSDISSFKHINELK(bi)SLEHR_;_KIMNSDISSFKHINELK(bi)SLEHR_;_KIMNSDISSFKHINELK(bi)SLEHR_;_KIMNSDISSFKHINELK(bi)SLEHR_;_KIMNSDISSFKHINELK(bi)SLEHR_;_KIMNSDISSFKHINELK(bi)SLEHR_;_KIMNSDISSFKHINELK(bi)SLEHR_;_KIMNSDISSFKHINELK(bi)SLEHR_;_KIMNSDISSFKHINELK(bi)SLEHR_;_KIMNSDISSFKHINELK(bi)SLEHR_;_KIM(ox)NSDISSFKHINELK(bi)SLEHR_;_KIM(ox)NSDISSFKHI…	312	NA	0.102858	0.494306	0.579758	NA	NA	NA	23.3596	23.6291	23.3443	24.5111	23.9344	23.6268	NA	NA	NA	NA	NA	NA
PF3D7_0105700	Plasmodium falciparum 3D7	asparagine-rich antigen Pfa35-2	N/A	Biotin (K)	0	1	1	ANNKIETYNHMINGMNDINVNNNVR	_ANNK(bi)IETYNHMINGMNDINVNNNVR_;_ANNK(bi)IETYNHMINGMNDINVNNNVR_;_ANNK(bi)IETYNHMINGMNDINVNNNVR_;_ANNK(bi)IETYNHMINGMNDINVNNNVR_;_ANNK(bi)IETYNHMINGMNDINVNNNVR_	2285	NA	NA	NA	NA	0.0329972	0.534622	-1.42928	NA	NA	NA	NA	NA	NA	21.2159	21.0511	21.1632	19.3735	20.5954	19.1734
PF3D7_0108300	Plasmodium falciparum 3D7	conserved Plasmodium protein, unknown function	ARP	Biotin (K);Phospho (STY)	1	1	3	MESYIRESKKLTLK	_MESYIRES(ph)K(bi)KLTLK_;_MESYIRES(ph)K(bi)KLTLK_;_MESYIRES(ph)K(bi)KLTLK_;_MESYIRES(ph)K(bi)KLTLK_;_MESYIRES(ph)K(bi)KLTLK_	9	8	NA	NA	NA	0.130962	0.267659	-0.10863	NA	NA	NA	NA	NA	NA	23.2499	23.2647	23.2573	23.1079	23.0765	23.2615
PF3D7_0113000	Plasmodium falciparum 3D7	glutamic acid-rich protein GARP	GARP	Biotin (K)	0	1	3	DKKKEENSEVMSLYK	_DKK(bi)KEENSEVMSLYK_;_DKK(bi)KEENSEVMSLYK_;_DKK(bi)KEENSEVMSLYK_;_DKK(bi)KEENSEVMSLYK_;_DKK(bi)KEENSEVMSLYK_	163	NA	0.503927	0.132448	-0.223769	NA	NA	NA	20.699	20.6724	20.6458	20.8544	19.852	20.6394	NA	NA	NA	NA	NA	NA
PF3D7_0113000	Plasmodium falciparum 3D7	glutamic acid-rich protein GARP	GARP	Biotin (K);Oxidation (M)	0	1	2	EENSEVMSLYKTGQHKPK	_EENSEVMSLYK(bi)TGQHKPK_;_EENSEVMSLYK(bi)TGQHKPK_;_EENSEVMSLYK(bi)TGQHKPK_;_EENSEVMSLYK(bi)TGQHKPK_;_EENSEVMSLYK(bi)TGQHKPK_;_EENSEVMSLYK(bi)TGQHKPK_;_EENSEVMSLYK(bi)TGQHKPK_;_EENSEVMSLYK(bi)TGQHKPK_;_EENSEVMSLYK(bi)TGQHKPK_;_EENSEVMSLYK(bi)TGQHKPK_;_EENSEVMSLYK(bi)TGQHKPK_;_EENSEVMSLYK(bi)TGQHKPK_;_EENSEVMSLYK(bi)TGQHKPK_;_EENSEVMSLYK(bi)TGQHKPK_;_EENSEVMSLYK(bi)TGQHKPK_;_EENSEVMSLYK(bi)TGQHKPK_…	175	NA	0.147465	0.402816	0.625831	NA	NA	NA	20.6317	19.7479	20.1009	21.2423	20.4506	20.665	NA	NA	NA	NA	NA	NA
PF3D7_0113000	Plasmodium falciparum 3D7	glutamic acid-rich protein GARP	GARP	Biotin (K)	0	1	2	EENSEVMSLYKTGQHKPK	_EENSEVMSLYK(bi)TGQHKPK_;_EENSEVMSLYK(bi)TGQHKPK_;_EENSEVMSLYK(bi)TGQHKPK_;_EENSEVMSLYK(bi)TGQHKPK_;_EENSEVMSLYK(bi)TGQHKPK_;_EENSEVMSLYK(bi)TGQHKPK_;_EENSEVMSLYK(bi)TGQHKPK_;_EENSEVMSLYK(bi)TGQHKPK_;_EENSEVMSLYK(bi)TGQHKPK_;_EENSEVMSLYK(bi)TGQHKPK_;_EENSEVMSLYK(bi)TGQHKPK_;_EENSEVMSLYK(bi)TGQHKPK_;_EENSEVMSLYK(bi)TGQHKPK_;_EENSEVMSLYK(bi)TGQHKPK_;_EENSEVMSLYK(bi)TGQHKPK_;_EENSEVMSLYK(bi)TGQHKPK_…	175	NA	0.0630773	0.586202	-0.327022	0.0276141	0.557082	-0.797241	23.8843	23.7173	23.5361	23.4752	23.2273	23.454	21.4046	22.0338	22.0988	20.9098	21.0485	21.1872
PF3D7_0113000	Plasmodium falciparum 3D7	glutamic acid-rich protein GARP	GARP	Biotin (K)	0	1	3	HVVKNVIEDEDKDGVEIINLEDKEACEEQHITVESR	_HVVK(bi)NVIEDEDKDGVEIINLEDKEACEEQHITVESR_;_HVVK(bi)NVIEDEDKDGVEIINLEDKEACEEQHITVESR_	444	NA	NA	NA	NA	NA	NA	NA	NA	NA	NA	NA	NA	NA	NA	NA	NA	NA	NA	NA
PF3D7_0113000	Plasmodium falciparum 3D7	glutamic acid-rich protein GARP	GARP	Biotin (K)	0	1	1	IEEAELQKQK	_IEEAELQK(bi)QK_;_IEEAELQK(bi)QK_;_IEEAELQK(bi)QK_;_IEEAELQK(bi)QK_;_IEEAELQK(bi)QK_;_IEEAELQK(bi)QK_;_IEEAELQK(bi)QK_;_IEEAELQK(bi)QK_;_IEEAELQK(bi)QK_;_IEEAELQK(bi)QK_;_IEEAELQK(bi)QK_;_IEEAELQK(bi)QK_;_IEEAELQK(bi)QK_;_IEEAELQK(bi)QK_;_IEEAELQK(bi)QK_;_IEEAELQK(bi)QK_	541	NA	0.54312	0.116488	-0.0629956	NA	NA	NA	23.8121	23.9533	23.7368	23.63	23.8408	23.8426	NA	NA	NA	NA	NA	NA
PF3D7_0113000	Plasmodium falciparum 3D7	glutamic acid-rich protein GARP	GARP	Biotin (K)	0	1	3	KEENSEVMSLYKTGQHKPK	_KEENSEVMSLYK(bi)TGQHKPK_;_KEENSEVMSLYK(bi)TGQHKPK_;_KEENSEVMSLYK(bi)TGQHKPK_;_KEENSEVMSLYK(bi)TGQHKPK_;_KEENSEVMSLYK(bi)TGQHKPK_;_KEENSEVMSLYK(bi)TGQHKPK_;_KEENSEVMSLYK(bi)TGQHKPK_;_KEENSEVMSLYK(bi)TGQHKPK_;_KEENSEVMSLYK(bi)TGQHKPK_;_KEENSEVMSLYK(bi)TGQHKPK_;_KEENSEVMSLYK(bi)TGQHKPK_;_KEENSEVMSLYK(bi)TGQHKPK_;_KEENSEVMSLYK(bi)TGQHKPK_;_KEENSEVMSLYK(bi)TGQHKPK_;_KEENSEVMSLYK(bi)TGQHKPK_;_KEENSEVM…	175	NA	0.416591	0.167731	-0.873446	0.199946	0.193025	-0.423241	26.2716	26.0751	26.2099	26.2122	26.3371	23.3869	23.078	23.7199	23.1942	22.9673	22.5476	23.2075
PF3D7_0113000	Plasmodium falciparum 3D7	glutamic acid-rich protein GARP	GARP	Biotin (K)	0	1	2	KKEENSEVMSLYK	_K(bi)KEENSEVMSLYK_;_K(bi)KEENSEVMSLYK_;_K(bi)KEENSEVMSLYK_	163	NA	NA	NA	NA	NA	NA	NA	NA	NA	NA	NA	NA	NA	NA	NA	NA	NA	NA	NA
PF3D7_0113000	Plasmodium falciparum 3D7	glutamic acid-rich protein GARP	GARP	Biotin (K)	0	1	2	KMAKIEEAELQK	_K(bi)M(ox)AKIEEAELQK_;_KM(ox)AK(bi)IEEAELQK_;_KM(ox)AK(bi)IEEAELQK_;_K(bi)M(ox)AKIEEAELQK_;_K(bi)M(ox)AKIEEAELQK_;_K(bi)M(ox)AKIEEAELQK_;_K(bi)MAKIEEAELQK_;_KMAK(bi)IEEAELQK_;_KMAK(bi)IEEAELQK_;_KMAK(bi)IEEAELQK_;_KMAK(bi)IEEAELQK_;_KMAK(bi)IEEAELQK_;_KMAK(bi)IEEAELQK_;_KMAK(bi)IEEAELQK_;_KMAK(bi)IEEAELQK_;_KMAK(bi)IEEAELQK_;_KMAK(bi)IEEAELQK_;_KMAK(bi)IEEAELQK_;_KMAK(bi)IEEAELQK_;_KMAK(bi)IEEAE…	530;533	NA	0.0350548	0.692122	-0.363566	0.273658	0.156296	-0.196619	24.5154	24.3886	24.2671	23.8834	24.0008	24.1962	20.2992	20.5256	20.7521	20.1845	20.329	20.4735
PF3D7_0113000	Plasmodium falciparum 3D7	glutamic acid-rich protein GARP	GARP	Biotin (K);Oxidation (M)	0	1	2	KMAKIEEAELQK	_K(bi)M(ox)AKIEEAELQK_;_KM(ox)AK(bi)IEEAELQK_;_KM(ox)AK(bi)IEEAELQK_;_K(bi)M(ox)AKIEEAELQK_;_K(bi)M(ox)AKIEEAELQK_;_K(bi)M(ox)AKIEEAELQK_;_K(bi)MAKIEEAELQK_;_KMAK(bi)IEEAELQK_;_KMAK(bi)IEEAELQK_;_KMAK(bi)IEEAELQK_;_KMAK(bi)IEEAELQK_;_KMAK(bi)IEEAELQK_;_KMAK(bi)IEEAELQK_;_KMAK(bi)IEEAELQK_;_KMAK(bi)IEEAELQK_;_KMAK(bi)IEEAELQK_;_KMAK(bi)IEEAELQK_;_KMAK(bi)IEEAELQK_;_KMAK(bi)IEEAELQK_;_KMAK(bi)IEEAE…	530;533	NA	0.464446	0.146981	0.206478	NA	NA	NA	21.574	21.9336	22.0604	21.6464	22.3197	22.2213	NA	NA	NA	NA	NA	NA
PF3D7_0113000	Plasmodium falciparum 3D7	glutamic acid-rich protein GARP	GARP	2 Biotin (K)	0	2	3	KMAKIEEAELQKQK	_KMAK(bi)IEEAELQKQK_;_KMAK(bi)IEEAELQKQK_;_KMAK(bi)IEEAELQKQK_;_K(bi)MAKIEEAELQKQK_;_K(bi)MAKIEEAELQKQK_;_KMAK(bi)IEEAELQKQK_;_KMAK(bi)IEEAELQKQK_;_KMAK(bi)IEEAELQKQK_;_KMAK(bi)IEEAELQKQK_;_K(bi)MAKIEEAELQKQK_;_KMAK(bi)IEEAELQKQK_;_K(bi)MAKIEEAELQKQK_;_K(bi)MAK(bi)IEEAELQKQK_;_K(bi)MAK(bi)IEEAELQKQK_;_K(bi)MAK(bi)IEEAELQKQK_;_K(bi)MAK(bi)IEEAELQKQK_;_K(bi)MAK(bi)IEEAELQKQK_;_K(bi)MAK(bi)IEEAELQKQ…	533;530	NA	0.809111	0.0405142	0.0394714	NA	NA	NA	20.7872	20.8202	21.2372	21.073	20.9024	20.9877	NA	NA	NA	NA	NA	NA
PF3D7_0113000	Plasmodium falciparum 3D7	glutamic acid-rich protein GARP	GARP	Biotin (K)	0	1	3	KMAKIEEAELQKQK	_KMAK(bi)IEEAELQKQK_;_KMAK(bi)IEEAELQKQK_;_KMAK(bi)IEEAELQKQK_;_K(bi)MAKIEEAELQKQK_;_K(bi)MAKIEEAELQKQK_;_KMAK(bi)IEEAELQKQK_;_KMAK(bi)IEEAELQKQK_;_KMAK(bi)IEEAELQKQK_;_KMAK(bi)IEEAELQKQK_;_K(bi)MAKIEEAELQKQK_;_KMAK(bi)IEEAELQKQK_;_K(bi)MAKIEEAELQKQK_;_K(bi)MAK(bi)IEEAELQKQK_;_K(bi)MAK(bi)IEEAELQKQK_;_K(bi)MAK(bi)IEEAELQKQK_;_K(bi)MAK(bi)IEEAELQKQK_;_K(bi)MAK(bi)IEEAELQKQK_;_K(bi)MAK(bi)IEEAELQKQ…	533;530	NA	0.277202	0.255801	0.271978	NA	NA	NA	23.4216	23.2092	23.0668	23.8277	23.5168	23.1689	NA	NA	NA	NA	NA	NA
PF3D7_0113000	Plasmodium falciparum 3D7	glutamic acid-rich protein GARP	GARP	Biotin (K);Oxidation (M)	0	1	3	KMAKIEEAELQKQK	_KMAK(bi)IEEAELQKQK_;_KMAK(bi)IEEAELQKQK_;_KMAK(bi)IEEAELQKQK_;_K(bi)MAKIEEAELQKQK_;_K(bi)MAKIEEAELQKQK_;_KMAK(bi)IEEAELQKQK_;_KMAK(bi)IEEAELQKQK_;_KMAK(bi)IEEAELQKQK_;_KMAK(bi)IEEAELQKQK_;_K(bi)MAKIEEAELQKQK_;_KMAK(bi)IEEAELQKQK_;_K(bi)MAKIEEAELQKQK_;_K(bi)MAK(bi)IEEAELQKQK_;_K(bi)MAK(bi)IEEAELQKQK_;_K(bi)MAK(bi)IEEAELQKQK_;_K(bi)MAK(bi)IEEAELQKQK_;_K(bi)MAK(bi)IEEAELQKQK_;_K(bi)MAK(bi)IEEAELQKQ…	533;530	NA	0.208927	0.318105	0.653272	NA	NA	NA	20.0853	19.5026	20.668	20.2981	20.664	21.2535	NA	NA	NA	NA	NA	NA
PF3D7_0113000	Plasmodium falciparum 3D7	glutamic acid-rich protein GARP	GARP	Biotin (K)	0	1	1	LIDEPEQLTLMDKSK	_LIDEPEQLTLMDKSK(bi)_;_LIDEPEQLTLMDK(bi)SK_;_LIDEPEQLTLMDK(bi)SK_;_LIDEPEQLTLMDK(bi)SK_;_LIDEPEQLTLMDKSK(bi)_;_LIDEPEQLTLMDK(bi)SK_;_LIDEPEQLTLMDK(bi)SK_;_LIDEPEQLTLMDK(bi)SK_;_LIDEPEQLTLMDK(bi)SK_;_LIDEPEQLTLMDK(bi)SK_;_LIDEPEQLTLMDKSK(bi)_;_LIDEPEQLTLMDKSK(bi)_;_LIDEPEQLTLMDKSK(bi)_;_LIDEPEQLTLMDKSK(bi)_;_LIDEPEQLTLM(ox)DK(bi)SK_;_LIDEPEQLTLM(ox)DK(bi)SK_;_LIDEPEQLTLM(ox)DK(bi)SK_;_LIDEPEQLTLM(…	499;497	NA	0.00473068	1.12798	-0.643982	NA	NA	NA	23.4925	23.2986	23.1416	22.7303	22.5674	22.7031	NA	NA	NA	NA	NA	NA
PF3D7_0113000	Plasmodium falciparum 3D7	glutamic acid-rich protein GARP	GARP	Biotin (K)	0	1	2	LIDEPEQLTLMDKSKVEEK	_LIDEPEQLTLM(ox)DK(bi)SKVEEK_;_LIDEPEQLTLM(ox)DK(bi)SKVEEK_;_LIDEPEQLTLM(ox)DKSKVEEK(bi)_;_LIDEPEQLTLM(ox)DK(bi)SKVEEK_;_LIDEPEQLTLM(ox)DK(bi)SKVEEK_;_LIDEPEQLTLM(ox)DKSKVEEK(bi)_;_LIDEPEQLTLM(ox)DK(bi)SKVEEK_;_LIDEPEQLTLM(ox)DK(bi)SKVEEK_;_LIDEPEQLTLM(ox)DK(bi)SKVEEK_;_LIDEPEQLTLM(ox)DKSKVEEK(bi)_;_LIDEPEQLTLM(ox)DK(bi)SKVEEK_;_LIDEPEQLTLM(ox)DKSK(bi)VEEK_;_LIDEPEQLTLM(ox)DK(bi)SKVEEK_;_LIDEPEQL…	497;503;499	NA	0.163495	0.37818	-0.206376	NA	NA	NA	25.538	25.6291	25.3247	25.3447	25.3959	25.1321	NA	NA	NA	NA	NA	NA
PF3D7_0113000	Plasmodium falciparum 3D7	glutamic acid-rich protein GARP	GARP	Biotin (K);Oxidation (M)	0	1	2	LIDEPEQLTLMDKSKVEEK	_LIDEPEQLTLM(ox)DK(bi)SKVEEK_;_LIDEPEQLTLM(ox)DK(bi)SKVEEK_;_LIDEPEQLTLM(ox)DKSKVEEK(bi)_;_LIDEPEQLTLM(ox)DK(bi)SKVEEK_;_LIDEPEQLTLM(ox)DK(bi)SKVEEK_;_LIDEPEQLTLM(ox)DKSKVEEK(bi)_;_LIDEPEQLTLM(ox)DK(bi)SKVEEK_;_LIDEPEQLTLM(ox)DK(bi)SKVEEK_;_LIDEPEQLTLM(ox)DK(bi)SKVEEK_;_LIDEPEQLTLM(ox)DKSKVEEK(bi)_;_LIDEPEQLTLM(ox)DK(bi)SKVEEK_;_LIDEPEQLTLM(ox)DKSK(bi)VEEK_;_LIDEPEQLTLM(ox)DK(bi)SKVEEK_;_LIDEPEQL…	497;503;499	NA	0.414055	0.168486	-0.505826	NA	NA	NA	22.949	23.1976	24.5478	23.2284	23.3793	22.5692	NA	NA	NA	NA	NA	NA
PF3D7_0113000	Plasmodium falciparum 3D7	glutamic acid-rich protein GARP	GARP	Biotin (K)	0	1	3	LIDEPEQLTLMDKSKVEEKNLSIQEQLIGTIGR	_LIDEPEQLTLMDK(bi)SKVEEKNLSIQEQLIGTIGR_;_LIDEPEQLTLMDKSKVEEK(bi)NLSIQEQLIGTIGR_;_LIDEPEQLTLMDK(bi)SKVEEKNLSIQEQLIGTIGR_;_LIDEPEQLTLMDK(bi)SKVEEKNLSIQEQLIGTIGR_;_LIDEPEQLTLMDKSKVEEK(bi)NLSIQEQLIGTIGR_;_LIDEPEQLTLMDK(bi)SKVEEKNLSIQEQLIGTIGR_;_LIDEPEQLTLMDK(bi)SKVEEKNLSIQEQLIGTIGR_;_LIDEPEQLTLM(ox)DKSK(bi)VEEKNLSIQEQLIGTIGR_;_LIDEPEQLTLM(ox)DK(bi)SKVEEKNLSIQEQLIGTIGR_;_LIDEPEQLTLM(ox)DKSKVEEK(bi)NLS…	497;503;499	NA	0.0876118	0.517451	1.06182	NA	NA	NA	24.1341	24.0916	23.2575	25.6074	24.7233	24.338	NA	NA	NA	NA	NA	NA
PF3D7_0113000	Plasmodium falciparum 3D7	glutamic acid-rich protein GARP	GARP	Biotin (K);Oxidation (M)	0	1	3	LIDEPEQLTLMDKSKVEEKNLSIQEQLIGTIGR	_LIDEPEQLTLMDK(bi)SKVEEKNLSIQEQLIGTIGR_;_LIDEPEQLTLMDKSKVEEK(bi)NLSIQEQLIGTIGR_;_LIDEPEQLTLMDK(bi)SKVEEKNLSIQEQLIGTIGR_;_LIDEPEQLTLMDK(bi)SKVEEKNLSIQEQLIGTIGR_;_LIDEPEQLTLMDKSKVEEK(bi)NLSIQEQLIGTIGR_;_LIDEPEQLTLMDK(bi)SKVEEKNLSIQEQLIGTIGR_;_LIDEPEQLTLMDK(bi)SKVEEKNLSIQEQLIGTIGR_;_LIDEPEQLTLM(ox)DKSK(bi)VEEKNLSIQEQLIGTIGR_;_LIDEPEQLTLM(ox)DK(bi)SKVEEKNLSIQEQLIGTIGR_;_LIDEPEQLTLM(ox)DKSKVEEK(bi)NLS…	497;503;499	NA	NA	NA	NA	NA	NA	NA	NA	NA	NA	NA	NA	NA	NA	NA	NA	NA	NA	NA
PF3D7_0113000	Plasmodium falciparum 3D7	glutamic acid-rich protein GARP	GARP	Biotin (K)	0	1	1	MAKIEEAELQK	_M(ox)AK(bi)IEEAELQK_;_M(ox)AK(bi)IEEAELQK_;_M(ox)AK(bi)IEEAELQK_;_M(ox)AK(bi)IEEAELQK_;_M(ox)AK(bi)IEEAELQK_;_M(ox)AK(bi)IEEAELQK_;_M(ox)AK(bi)IEEAELQK_;_M(ox)AK(bi)IEEAELQK_;_M(ox)AK(bi)IEEAELQK_;_M(ox)AK(bi)IEEAELQK_;_M(ox)AK(bi)IEEAELQK_;_M(ox)AK(bi)IEEAELQK_;_M(ox)AK(bi)IEEAELQK_;_M(ox)AK(bi)IEEAELQK_;_M(ox)AK(bi)IEEAELQK_;_M(ox)AK(bi)IEEAELQK_;_M(ox)AK(bi)IEEAELQK_;_M(ox)AK(bi)IEEAELQK_;_M(…	533	NA	0.312048	0.230441	-0.234632	0.545502	0.0767343	-0.142067	27.8317	27.2843	27.3826	27.1136	27.1946	27.4864	24.0109	24.0999	24.1888	24.3219	23.9541	23.5974
PF3D7_0113000	Plasmodium falciparum 3D7	glutamic acid-rich protein GARP	GARP	Biotin (K);Oxidation (M)	0	1	1	MAKIEEAELQK	_M(ox)AK(bi)IEEAELQK_;_M(ox)AK(bi)IEEAELQK_;_M(ox)AK(bi)IEEAELQK_;_M(ox)AK(bi)IEEAELQK_;_M(ox)AK(bi)IEEAELQK_;_M(ox)AK(bi)IEEAELQK_;_M(ox)AK(bi)IEEAELQK_;_M(ox)AK(bi)IEEAELQK_;_M(ox)AK(bi)IEEAELQK_;_M(ox)AK(bi)IEEAELQK_;_M(ox)AK(bi)IEEAELQK_;_M(ox)AK(bi)IEEAELQK_;_M(ox)AK(bi)IEEAELQK_;_M(ox)AK(bi)IEEAELQK_;_M(ox)AK(bi)IEEAELQK_;_M(ox)AK(bi)IEEAELQK_;_M(ox)AK(bi)IEEAELQK_;_M(ox)AK(bi)IEEAELQK_;_M(…	533	NA	0.771242	0.0447459	0.0643578	0.14506	0.247832	-0.394061	24.5928	24.612	25.1328	24.6421	24.8805	25.008	21.7075	21.5636	21.5956	20.9228	21.6397	21.1221
PF3D7_0113000	Plasmodium falciparum 3D7	glutamic acid-rich protein GARP	GARP	Biotin (K);Oxidation (M)	0	1	2	MAKIEEAELQKQK	_M(ox)AK(bi)IEEAELQKQK_;_M(ox)AK(bi)IEEAELQKQK_;_M(ox)AK(bi)IEEAELQKQK_;_M(ox)AK(bi)IEEAELQKQK_;_M(ox)AK(bi)IEEAELQKQK_;_M(ox)AK(bi)IEEAELQKQK_;_M(ox)AK(bi)IEEAELQKQK_;_M(ox)AK(bi)IEEAELQKQK_;_M(ox)AK(bi)IEEAELQKQK_;_M(ox)AK(bi)IEEAELQKQK_;_M(ox)AK(bi)IEEAELQKQK_;_M(ox)AK(bi)IEEAELQKQK_;_M(ox)AK(bi)IEEAELQKQK_;_M(ox)AK(bi)IEEAELQKQK_;_M(ox)AK(bi)IEEAELQKQK_;_M(ox)AK(bi)IEEAELQKQK_;_MAKIEEAELQK(bi…	533;541	NA	0.0819137	0.52952	0.623441	NA	NA	NA	23.7362	23.9892	24.3801	24.8869	24.8164	24.2725	NA	NA	NA	NA	NA	NA
PF3D7_0113000	Plasmodium falciparum 3D7	glutamic acid-rich protein GARP	GARP	Biotin (K)	0	1	2	MAKIEEAELQKQK	_M(ox)AK(bi)IEEAELQKQK_;_M(ox)AK(bi)IEEAELQKQK_;_M(ox)AK(bi)IEEAELQKQK_;_M(ox)AK(bi)IEEAELQKQK_;_M(ox)AK(bi)IEEAELQKQK_;_M(ox)AK(bi)IEEAELQKQK_;_M(ox)AK(bi)IEEAELQKQK_;_M(ox)AK(bi)IEEAELQKQK_;_M(ox)AK(bi)IEEAELQKQK_;_M(ox)AK(bi)IEEAELQKQK_;_M(ox)AK(bi)IEEAELQKQK_;_M(ox)AK(bi)IEEAELQKQK_;_M(ox)AK(bi)IEEAELQKQK_;_M(ox)AK(bi)IEEAELQKQK_;_M(ox)AK(bi)IEEAELQKQK_;_M(ox)AK(bi)IEEAELQKQK_;_MAKIEEAELQK(bi…	533;541	NA	0.420226	0.16637	0.183971	0.757369	0.0411005	0.172659	26.9572	26.4036	26.6518	26.9921	26.9735	26.5989	20.6959	22.1703	21.4743	21.097	21.6195	22.1421
PF3D7_0113000	Plasmodium falciparum 3D7	glutamic acid-rich protein GARP	GARP	Biotin (K)	0	1	1	PLSQPQCKLIDEPEQLTLMDK	_PLSQPQCK(bi)LIDEPEQLTLMDK_;_PLSQPQCK(bi)LIDEPEQLTLMDK_;_PLSQPQCK(bi)LIDEPEQLTLMDK_;_PLSQPQCK(bi)LIDEPEQLTLMDK_	484	NA	NA	NA	NA	NA	NA	NA	NA	NA	NA	NA	NA	NA	NA	NA	NA	NA	NA	NA
PF3D7_0113000	Plasmodium falciparum 3D7	glutamic acid-rich protein GARP	GARP	Biotin (K)	0	1	2	SKVEEKNLSIQEQLIGTIGR	_SKVEEK(bi)NLSIQEQLIGTIGR_;_SKVEEK(bi)NLSIQEQLIGTIGR_;_SKVEEK(bi)NLSIQEQLIGTIGR_;_SKVEEK(bi)NLSIQEQLIGTIGR_;_SKVEEK(bi)NLSIQEQLIGTIGR_;_SKVEEK(bi)NLSIQEQLIGTIGR_;_SKVEEK(bi)NLSIQEQLIGTIGR_;_SKVEEK(bi)NLSIQEQLIGTIGR_;_SKVEEK(bi)NLSIQEQLIGTIGR_;_SKVEEK(bi)NLSIQEQLIGTIGR_;_SKVEEK(bi)NLSIQEQLIGTIGR_;_SKVEEK(bi)NLSIQEQLIGTIGR_;_SKVEEK(bi)NLSIQEQLIGTIGR_;_SKVEEK(bi)NLSIQEQLIGTIGR_;_SK(bi)VEEKNLSIQEQLIG…	503;499	NA	0.472032	0.142796	-0.171849	0.00770534	0.859585	-1.01357	28.7004	29.3907	28.8521	28.701	28.8835	28.8432	25.9282	25.3927	25.4208	24.3541	24.6949	24.6519
PF3D7_0113000	Plasmodium falciparum 3D7	glutamic acid-rich protein GARP	GARP	Biotin (K)	0	1	1	VEEKNLSIQEQLIGTIGR	_VEEK(bi)NLSIQEQLIGTIGR_;_VEEK(bi)NLSIQEQLIGTIGR_;_VEEK(bi)NLSIQEQLIGTIGR_;_VEEK(bi)NLSIQEQLIGTIGR_;_VEEK(bi)NLSIQEQLIGTIGR_;_VEEK(bi)NLSIQEQLIGTIGR_;_VEEK(bi)NLSIQEQLIGTIGR_;_VEEK(bi)NLSIQEQLIGTIGR_;_VEEK(bi)NLSIQEQLIGTIGR_;_VEEK(bi)NLSIQEQLIGTIGR_;_VEEK(bi)NLSIQEQLIGTIGR_;_VEEK(bi)NLSIQEQLIGTIGR_;_VEEK(bi)NLSIQEQLIGTIGR_;_VEEK(bi)NLSIQEQLIGTIGR_;_VEEK(bi)NLSIQEQLIGTIGR_;_VEEK(bi)NLSIQEQLIGTIGR_…	503	NA	0.734726	0.0526136	0.100288	0.0165233	0.685439	-1.86662	24.5491	25.2588	24.6166	24.5928	25.0849	25.0477	22.0796	21.5572	21.444	20.6733	19.3007	19.5069
PF3D7_0113200	Plasmodium falciparum 3D7	Plasmodium exported protein, unknown function	N/A	Biotin (K)	0	1	2	GQQYNHQTENKNKNK	_GQQYNHQTENK(bi)NKNK_;_GQQYNHQTENKNK(bi)NK_;_GQQYNHQTENK(bi)NKNK_;_GQQYNHQTENK(bi)NKNK_	286;288	NA	NA	NA	NA	0.292623	0.153399	-0.339768	NA	NA	NA	NA	NA	NA	19.1163	19.4427	18.79	18.4164	18.7766	19.1368
PF3D7_0113200	Plasmodium falciparum 3D7	Plasmodium exported protein, unknown function	N/A	Biotin (K)	0	1	1	NKIINYPR	_NK(bi)IINYPR_;_NK(bi)IINYPR_;_NK(bi)IINYPR_;_NK(bi)IINYPR_;_NK(bi)IINYPR_;_NK(bi)IINYPR_;_NK(bi)IINYPR_	290	NA	0.198977	0.332973	0.69452	NA	NA	NA	22.7008	23.4109	24.121	23.7771	24.4338	24.1054	NA	NA	NA	NA	NA	NA
PF3D7_0113200	Plasmodium falciparum 3D7	Plasmodium exported protein, unknown function	N/A	Biotin (K)	0	1	2	NKQTKNSGLSHMFSSEINK	_NKQTK(bi)NSGLSHMFSSEINK_;_NKQTK(bi)NSGLSHMFSSEINK_;_NKQTK(bi)NSGLSHMFSSEINK_;_NKQTK(bi)NSGLSHMFSSEINK_;_NKQTK(bi)NSGLSHMFSSEINK_;_NKQTK(bi)NSGLSHMFSSEINK_;_NKQTK(bi)NSGLSHMFSSEINK_;_NKQTK(bi)NSGLSHMFSSEINK_;_NKQTK(bi)NSGLSHMFSSEINK_;_NKQTK(bi)NSGLSHMFSSEINK_;_NKQTK(bi)NSGLSHMFSSEINK_;_NKQTK(bi)NSGLSHMFSSEINK_;_NKQTK(bi)NSGLSHMFSSEINK_;_NKQTK(bi)NSGLSHMFSSEINK_;_NKQTK(bi)NSGLSHMFSSEINK_;_NKQTK(bi…	129	NA	0.23714	0.295861	0.334414	0.103276	0.30554	-0.697245	24.0581	23.5473	23.3547	24.0572	23.7578	24.1484	23.5107	23.5003	24.2302	22.5984	23.3178	23.2332
PF3D7_0113200	Plasmodium falciparum 3D7	Plasmodium exported protein, unknown function	N/A	Biotin (K)	0	1	1	QTKNSGLSHMFSSEINK	_QTK(bi)NSGLSHMFSSEINK_;_QTK(bi)NSGLSHMFSSEINK_;_QTK(bi)NSGLSHMFSSEINK_;_QTK(bi)NSGLSHMFSSEINK_;_QTK(bi)NSGLSHMFSSEINK_;_QTK(bi)NSGLSHMFSSEINK_;_QTK(bi)NSGLSHMFSSEINK_;_QTK(bi)NSGLSHMFSSEINK_;_QTK(bi)NSGLSHMFSSEINK_;_QTK(bi)NSGLSHMFSSEINK_;_QTK(bi)NSGLSHMFSSEINK_;_QTK(bi)NSGLSHMFSSEINK_;_QTK(bi)NSGLSHMFSSEINK_;_QTK(bi)NSGLSHM(ox)FSSEINK_;_QTK(bi)NSGLSHM(ox)FSSEINK_;_QTK(bi)NSGLSHM(ox)FSSEINK_	129	NA	0.448621	0.153992	0.142294	0.153583	0.24007	-0.570881	23.0769	23.036	22.6605	23.045	22.8953	23.26	24.4236	23.4904	23.5955	23.02	23.4876	23.2893
PF3D7_0113200	Plasmodium falciparum 3D7	Plasmodium exported protein, unknown function	N/A	Biotin (K);Oxidation (M)	0	1	1	QTKNSGLSHMFSSEINK	_QTK(bi)NSGLSHMFSSEINK_;_QTK(bi)NSGLSHMFSSEINK_;_QTK(bi)NSGLSHMFSSEINK_;_QTK(bi)NSGLSHMFSSEINK_;_QTK(bi)NSGLSHMFSSEINK_;_QTK(bi)NSGLSHMFSSEINK_;_QTK(bi)NSGLSHMFSSEINK_;_QTK(bi)NSGLSHMFSSEINK_;_QTK(bi)NSGLSHMFSSEINK_;_QTK(bi)NSGLSHMFSSEINK_;_QTK(bi)NSGLSHMFSSEINK_;_QTK(bi)NSGLSHMFSSEINK_;_QTK(bi)NSGLSHMFSSEINK_;_QTK(bi)NSGLSHM(ox)FSSEINK_;_QTK(bi)NSGLSHM(ox)FSSEINK_;_QTK(bi)NSGLSHM(ox)FSSEINK_	129	NA	NA	NA	NA	NA	NA	NA	NA	NA	NA	NA	NA	NA	NA	NA	NA	NA	NA	NA
PF3D7_0113200	Plasmodium falciparum 3D7	Plasmodium exported protein, unknown function	N/A	Biotin (K)	0	1	3	QTKNSGLSHMFSSEINKTQTNESNNKR	_QTK(bi)NSGLSHMFSSEINKTQTNESNNKR_;_QTK(bi)NSGLSHMFSSEINKTQTNESNNKR_;_QTK(bi)NSGLSHMFSSEINKTQTNESNNKR_;_QTK(bi)NSGLSHMFSSEINKTQTNESNNKR_;_QTK(bi)NSGLSHMFSSEINKTQTNESNNKR_;_QTK(bi)NSGLSHMFSSEINKTQTNESNNKR_;_QTK(bi)NSGLSHMFSSEINKTQTNESNNKR_;_QTK(bi)NSGLSHMFSSEINKTQTNESNNKR_;_QTK(bi)NSGLSHMFSSEINKTQTNESNNKR_;_QTK(bi)NSGLSHMFSSEINKTQTNESNNKR_	129	NA	0.015206	0.867873	1.2478	NA	NA	NA	22.9575	22.2772	22.2119	23.9105	23.9344	23.3451	NA	NA	NA	NA	NA	NA
PF3D7_0113200	Plasmodium falciparum 3D7	Plasmodium exported protein, unknown function	N/A	Biotin (K)	0	1	1	VKGQQYNHQTENK	_VK(bi)GQQYNHQTENK_;_VK(bi)GQQYNHQTENK_;_VK(bi)GQQYNHQTENK_	275	NA	NA	NA	NA	NA	NA	NA	NA	NA	NA	NA	NA	NA	NA	NA	NA	NA	NA	NA
PF3D7_0113200	Plasmodium falciparum 3D7	Plasmodium exported protein, unknown function	N/A	Biotin (K)	0	1	2	VKGQQYNHQTENKNK	_VK(bi)GQQYNHQTENKNK_;_VK(bi)GQQYNHQTENKNK_;_VK(bi)GQQYNHQTENKNK_;_VK(bi)GQQYNHQTENKNK_;_VK(bi)GQQYNHQTENKNK_	275	NA	NA	NA	NA	NA	NA	NA	NA	NA	NA	NA	NA	NA	NA	NA	NA	NA	NA	NA
PF3D7_0113200	Plasmodium falciparum 3D7	Plasmodium exported protein, unknown function	N/A	Biotin (K)	0	1	3	VKGQQYNHQTENKNKNK	_VKGQQYNHQTENKNKNK(bi)_;_VKGQQYNHQTENKNKNK(bi)_;_VKGQQYNHQTENKNK(bi)NK_;_VKGQQYNHQTENKNK(bi)NK_;_VKGQQYNHQTENKNKNK(bi)_;_VKGQQYNHQTENKNKNK(bi)_	290;288	NA	NA	NA	NA	NA	NA	NA	NA	NA	NA	NA	NA	NA	NA	NA	NA	NA	NA	NA
PF3D7_0113300	Plasmodium falciparum 3D7	Plasmodium exported protein (hyp1), unknown function	N/A	Biotin (K)	0	1	3	DYVNNDRYNNVNTNDYTSYKDKGEQFNDTICVVDK	_DYVNNDRYNNVNTNDYTSYK(bi)DKGEQFNDTICVVDK_;_DYVNNDRYNNVNTNDYTSYK(bi)DKGEQFNDTICVVDK_	99	NA	NA	NA	NA	NA	NA	NA	NA	NA	NA	NA	NA	NA	NA	NA	NA	NA	NA	NA
PF3D7_0113700	Plasmodium falciparum 3D7	heat shock protein 40, type II	HSP40	Biotin (K)	0	1	2	AYSFYNKYFSKSSGAGNHNIFTHIK	_AYSFYNKYFSK(bi)SSGAGNHNIFTHIK_;_AYSFYNKYFSK(bi)SSGAGNHNIFTHIK_;_AYSFYNKYFSK(bi)SSGAGNHNIFTHIK_;_AYSFYNKYFSK(bi)SSGAGNHNIFTHIK_;_AYSFYNKYFSK(bi)SSGAGNHNIFTHIK_;_AYSFYNKYFSK(bi)SSGAGNHNIFTHIK_;_AYSFYNKYFSK(bi)SSGAGNHNIFTHIK_;_AYSFYNKYFSK(bi)SSGAGNHNIFTHIK_;_AYSFYNKYFSK(bi)SSGAGNHNIFTHIK_;_AYSFYNKYFSK(bi)SSGAGNHNIFTHIK_;_AYSFYNKYFSK(bi)SSGAGNHNIFTHIK_;_AYSFYNKYFSK(bi)SSGAGNHNIFTHIK_;_AYSFYNKYFSK(bi…	189;185	NA	NA	NA	NA	0.0285466	0.551522	-0.693938	NA	NA	NA	NA	NA	NA	24.1	24.7943	24.5241	23.7039	23.7723	23.8604
PF3D7_0113700	Plasmodium falciparum 3D7	heat shock protein 40, type II	HSP40	2 Biotin (K)	0	2	2	AYSFYNKYFSKSSGAGNHNIFTHIK	_AYSFYNKYFSK(bi)SSGAGNHNIFTHIK_;_AYSFYNKYFSK(bi)SSGAGNHNIFTHIK_;_AYSFYNKYFSK(bi)SSGAGNHNIFTHIK_;_AYSFYNKYFSK(bi)SSGAGNHNIFTHIK_;_AYSFYNKYFSK(bi)SSGAGNHNIFTHIK_;_AYSFYNKYFSK(bi)SSGAGNHNIFTHIK_;_AYSFYNKYFSK(bi)SSGAGNHNIFTHIK_;_AYSFYNKYFSK(bi)SSGAGNHNIFTHIK_;_AYSFYNKYFSK(bi)SSGAGNHNIFTHIK_;_AYSFYNKYFSK(bi)SSGAGNHNIFTHIK_;_AYSFYNKYFSK(bi)SSGAGNHNIFTHIK_;_AYSFYNKYFSK(bi)SSGAGNHNIFTHIK_;_AYSFYNKYFSK(bi…	189;185	NA	NA	NA	NA	0.00267969	1.03564	-0.841955	NA	NA	NA	NA	NA	NA	24.4577	24.0384	24.3625	23.4408	23.4477	23.4443
PF3D7_0113700	Plasmodium falciparum 3D7	heat shock protein 40, type II	HSP40	Biotin (K)	0	1	3	DNGVFGKSSMDYYTLLGVDKGCSEDDLRR	_DNGVFGK(bi)SSMDYYTLLGVDKGCSEDDLRR_;_DNGVFGK(bi)SSMDYYTLLGVDKGCSEDDLRR_;_DNGVFGK(bi)SSMDYYTLLGVDKGCSEDDLRR_;_DNGVFGK(bi)SSMDYYTLLGVDKGCSEDDLRR_;_DNGVFGK(bi)SSMDYYTLLGVDKGCSEDDLRR_;_DNGVFGK(bi)SSMDYYTLLGVDKGCSEDDLRR_;_DNGVFGK(bi)SSMDYYTLLGVDKGCSEDDLRR_;_DNGVFGK(bi)SSM(ox)DYYTLLGVDKGCSEDDLRR_;_DNGVFGK(bi)SSM(ox)DYYTLLGVDKGCSEDDLRR_	78	NA	NA	NA	NA	0.0331356	0.534622	-0.673951	NA	NA	NA	NA	NA	NA	23.6588	23.2992	23.6081	22.562	23.1767	22.8056
PF3D7_0113700	Plasmodium falciparum 3D7	heat shock protein 40, type II	HSP40	Biotin (K);Oxidation (M)	0	1	3	DNGVFGKSSMDYYTLLGVDKGCSEDDLRR	_DNGVFGK(bi)SSMDYYTLLGVDKGCSEDDLRR_;_DNGVFGK(bi)SSMDYYTLLGVDKGCSEDDLRR_;_DNGVFGK(bi)SSMDYYTLLGVDKGCSEDDLRR_;_DNGVFGK(bi)SSMDYYTLLGVDKGCSEDDLRR_;_DNGVFGK(bi)SSMDYYTLLGVDKGCSEDDLRR_;_DNGVFGK(bi)SSMDYYTLLGVDKGCSEDDLRR_;_DNGVFGK(bi)SSMDYYTLLGVDKGCSEDDLRR_;_DNGVFGK(bi)SSM(ox)DYYTLLGVDKGCSEDDLRR_;_DNGVFGK(bi)SSM(ox)DYYTLLGVDKGCSEDDLRR_	78	NA	NA	NA	NA	NA	NA	NA	NA	NA	NA	NA	NA	NA	NA	NA	NA	NA	NA	NA
PF3D7_0113700	Plasmodium falciparum 3D7	heat shock protein 40, type II	HSP40	Biotin (K)	0	1	1	EIFKESY	_EIFK(bi)ESY_;_EIFK(bi)ESY_;_EIFK(bi)ESY_;_EIFK(bi)ESY_;_EIFK(bi)ESY_;_EIFK(bi)ESY_	399	NA	NA	NA	NA	0.464867	0.0984078	1.17167	NA	NA	NA	NA	NA	NA	18.8319	23.0787	23.23	22.6994	23.2293	22.7269
PF3D7_0113700	Plasmodium falciparum 3D7	heat shock protein 40, type II	HSP40	Biotin (K)	0	1	2	HVNKGSKVEAEEK	_HVNK(bi)GSKVEAEEK_;_HVNK(bi)GSKVEAEEK_;_HVNK(bi)GSKVEAEEK_	117	NA	NA	NA	NA	NA	NA	NA	NA	NA	NA	NA	NA	NA	NA	NA	NA	NA	NA	NA
PF3D7_0113700	Plasmodium falciparum 3D7	heat shock protein 40, type II	HSP40	Biotin (K)	0	1	2	KLIKEIFK	_KLIK(bi)EIFK_;_K(bi)LIKEIFK_;_KLIK(bi)EIFK_;_KLIK(bi)EIFK_;_KLIK(bi)EIFK_;_KLIK(bi)EIFK_;_KLIK(bi)EIFK_	395;392	NA	NA	NA	NA	0.873251	0.0149963	0.0953528	NA	NA	NA	NA	NA	NA	21.3957	21.8457	20.3308	21.8679	21.2861	20.7043
PF3D7_0113700	Plasmodium falciparum 3D7	heat shock protein 40, type II	HSP40	Biotin (K)	0	1	3	KLIKEIFKESY	_K(bi)LIKEIFKESY_;_KLIK(bi)EIFKESY_;_KLIKEIFK(bi)ESY_;_K(bi)LIKEIFKESY_;_K(bi)LIKEIFKESY_;_K(bi)LIKEIFKESY_;_KLIK(bi)EIFKESY_;_K(bi)LIKEIFKESY_;_KLIK(bi)EIFKESY_;_KLIK(bi)EIFKESY_;_K(bi)LIKEIFKESY_;_KLIK(bi)EIFKESY_;_KLIK(bi)EIFKESY_;_KLIK(bi)EIFKESY_;_K(bi)LIKEIFKESY_;_KLIK(bi)EIFKESY_;_KLIK(bi)EIFKESY_;_KLIK(bi)EIFKESY_;_KLIK(bi)EIFKESY_;_KLIK(bi)EIFKESY_;_KLIK(bi)EIFKESY_;_K(bi)LIKEIFKESY_;_KL…	392;395;399	NA	0.475023	0.141318	0.46048	0.698688	0.0474153	-0.163851	20.4653	21.4483	20.9568	22.2995	21.4237	20.5285	22.1527	22.839	23.4208	22.71	22.3633	22.8475
PF3D7_0113700	Plasmodium falciparum 3D7	heat shock protein 40, type II	HSP40	Biotin (K)	0	1	1	LIKEIFK	_LIK(bi)EIFK_;_LIK(bi)EIFK_;_LIK(bi)EIFK_;_LIK(bi)EIFK_;_LIK(bi)EIFK_	395	NA	NA	NA	NA	0.371919	0.13121	0.232077	NA	NA	NA	NA	NA	NA	21.4216	21.5828	21.2604	21.2874	21.6537	22.0199
PF3D7_0113700	Plasmodium falciparum 3D7	heat shock protein 40, type II	HSP40	Biotin (K)	0	1	2	LIKEIFKESY	_LIK(bi)EIFKESY_;_LIK(bi)EIFKESY_;_LIK(bi)EIFKESY_;_LIK(bi)EIFKESY_;_LIK(bi)EIFKESY_;_LIK(bi)EIFKESY_	395	NA	NA	NA	NA	0.00374158	0.997031	-0.448161	NA	NA	NA	NA	NA	NA	22.7025	22.7891	22.9238	22.3954	22.3911	22.2844
PF3D7_0113700	Plasmodium falciparum 3D7	heat shock protein 40, type II	HSP40	Biotin (K)	0	1	1	NFFFNKDNGVFGK	_NFFFNK(bi)DNGVFGK_;_NFFFNK(bi)DNGVFGK_;_NFFFNK(bi)DNGVFGK_;_NFFFNK(bi)DNGVFGK_;_NFFFNK(bi)DNGVFGK_	71	NA	NA	NA	NA	0.562502	0.0743459	-0.13875	NA	NA	NA	NA	NA	NA	22.6717	21.9972	22.3345	22.0183	22.1957	22.3732
PF3D7_0113700	Plasmodium falciparum 3D7	heat shock protein 40, type II	HSP40	Biotin (K)	0	1	1	SSGAGNHNIFTHIKNLYPLR	_SSGAGNHNIFTHIK(bi)NLYPLR_;_SSGAGNHNIFTHIK(bi)NLYPLR_;_SSGAGNHNIFTHIK(bi)NLYPLR_;_SSGAGNHNIFTHIK(bi)NLYPLR_;_SSGAGNHNIFTHIK(bi)NLYPLR_;_SSGAGNHNIFTHIK(bi)NLYPLR_;_SSGAGNHNIFTHIK(bi)NLYPLR_;_SSGAGNHNIFTHIK(bi)NLYPLR_;_SSGAGNHNIFTHIK(bi)NLYPLR_;_SSGAGNHNIFTHIK(bi)NLYPLR_;_SSGAGNHNIFTHIK(bi)NLYPLR_;_SSGAGNHNIFTHIK(bi)NLYPLR_;_SSGAGNHNIFTHIK(bi)NLYPLR_;_SSGAGNHNIFTHIK(bi)NLYPLR_	203	NA	NA	NA	NA	0.0141646	0.71757	-0.656628	NA	NA	NA	NA	NA	NA	25.5074	25.1243	25.435	24.5112	24.8761	24.7095
PF3D7_0113700	Plasmodium falciparum 3D7	heat shock protein 40, type II	HSP40	Biotin (K)	0	1	2	SSMDYYTLLGVDKGCSEDDLRR	_SSMDYYTLLGVDK(bi)GCSEDDLRR_;_SSMDYYTLLGVDK(bi)GCSEDDLRR_	91	NA	NA	NA	NA	NA	NA	NA	NA	NA	NA	NA	NA	NA	NA	NA	NA	NA	NA	NA
PF3D7_0113700	Plasmodium falciparum 3D7	heat shock protein 40, type II	HSP40	Biotin (K)	0	1	1	VKYDLFGMDALK	_VK(bi)YDLFGM(ox)DALK_;_VK(bi)YDLFGM(ox)DALK_;_VK(bi)YDLFGM(ox)DALK_;_VK(bi)YDLFGMDALK_;_VK(bi)YDLFGMDALK_;_VK(bi)YDLFGMDALK_;_VK(bi)YDLFGMDALK_;_VK(bi)YDLFGMDALK_	145	NA	NA	NA	NA	0.0015895	1.08455	2.35607	NA	NA	NA	NA	NA	NA	19.2215	19.8242	19.3819	21.3338	22.1359	22.0261
PF3D7_0113700	Plasmodium falciparum 3D7	heat shock protein 40, type II	HSP40	Biotin (K)	0	1	2	VKYDLFGMDALKQSGFNSSNFQGNISINPLEVFTK	_VKYDLFGMDALK(bi)QSGFNSSNFQGNISINPLEVFTK_;_VKYDLFGMDALK(bi)QSGFNSSNFQGNISINPLEVFTK_;_VKYDLFGMDALK(bi)QSGFNSSNFQGNISINPLEVFTK_;_VKYDLFGMDALK(bi)QSGFNSSNFQGNISINPLEVFTK_;_VKYDLFGMDALK(bi)QSGFNSSNFQGNISINPLEVFTK_;_VKYDLFGMDALK(bi)QSGFNSSNFQGNISINPLEVFTK_	155	NA	NA	NA	NA	NA	NA	NA	NA	NA	NA	NA	NA	NA	NA	NA	NA	NA	NA	NA
PF3D7_0113700	Plasmodium falciparum 3D7	heat shock protein 40, type II	HSP40	Biotin (K)	0	1	2	WHPDKHVNKGSK	_WHPDKHVNK(bi)GSK_;_WHPDKHVNK(bi)GSK_;_WHPDKHVNK(bi)GSK_;_WHPDKHVNK(bi)GSK_;_WHPDKHVNK(bi)GSK_;_WHPDKHVNK(bi)GSK_;_WHPDKHVNK(bi)GSK_;_WHPDKHVNK(bi)GSK_;_WHPDKHVNK(bi)GSK_;_WHPDKHVNK(bi)GSK_;_WHPDKHVNK(bi)GSK_;_WHPDKHVNK(bi)GSK_	117	NA	NA	NA	NA	0.0482124	0.47441	-0.432168	NA	NA	NA	NA	NA	NA	22.1686	22.5678	22.2458	21.7374	21.8884	22.0598
PF3D7_0113700	Plasmodium falciparum 3D7	heat shock protein 40, type II	HSP40	Biotin (K)	0	1	1	YFSKSSGAGNHNIFTHIK	_YFSK(bi)SSGAGNHNIFTHIK_;_YFSK(bi)SSGAGNHNIFTHIK_;_YFSK(bi)SSGAGNHNIFTHIK_;_YFSK(bi)SSGAGNHNIFTHIK_;_YFSK(bi)SSGAGNHNIFTHIK_;_YFSK(bi)SSGAGNHNIFTHIK_;_YFSK(bi)SSGAGNHNIFTHIK_;_YFSK(bi)SSGAGNHNIFTHIK_;_YFSK(bi)SSGAGNHNIFTHIK_;_YFSK(bi)SSGAGNHNIFTHIK_;_YFSK(bi)SSGAGNHNIFTHIK_;_YFSK(bi)SSGAGNHNIFTHIK_;_YFSK(bi)SSGAGNHNIFTHIK_;_YFSK(bi)SSGAGNHNIFTHIK_;_YFSK(bi)SSGAGNHNIFTHIK_;_YFSK(bi)SSGAGNHNIFTHIK_…	189	NA	0.434864	0.159832	-0.284662	0.772361	0.0380681	-0.0622814	24.5211	24.2625	23.5539	24.1049	23.5664	23.8122	27.5618	27.1163	27.5023	27.6108	27.257	27.1258
PF3D7_0113700	Plasmodium falciparum 3D7	heat shock protein 40, type II	HSP40	2 Biotin (K)	0	2	2	YFSKSSGAGNHNIFTHIKNLYPLR	_YFSK(bi)SSGAGNHNIFTHIK(bi)NLYPLR_;_YFSK(bi)SSGAGNHNIFTHIK(bi)NLYPLR_;_YFSK(bi)SSGAGNHNIFTHIK(bi)NLYPLR_;_YFSK(bi)SSGAGNHNIFTHIK(bi)NLYPLR_;_YFSK(bi)SSGAGNHNIFTHIK(bi)NLYPLR_;_YFSK(bi)SSGAGNHNIFTHIK(bi)NLYPLR_	189;203	NA	NA	NA	NA	0.0936604	0.334351	-0.831544	NA	NA	NA	NA	NA	NA	23.1949	22.5014	22.8481	21.7764	22.6553	21.6182
PF3D7_0114500	Plasmodium falciparum 3D7	Plasmodium exported protein (hyp10), unknown function	N/A	Biotin (K)	0	1	2	SHILKTHKGENSMAQPIVNK	_SHILK(bi)THKGENSMAQPIVNK_;_SHILK(bi)THKGENSMAQPIVNK_;_SHILK(bi)THKGENSMAQPIVNK_;_SHILK(bi)THKGENSMAQPIVNK_;_SHILKTHK(bi)GENSMAQPIVNK_;_SHILK(bi)THKGENSMAQPIVNK_	58;61	NA	0.0998327	0.497342	-0.403242	NA	NA	NA	20.7778	20.6788	20.5985	19.9349	20.3612	20.5493	NA	NA	NA	NA	NA	NA
PF3D7_0114500	Plasmodium falciparum 3D7	Plasmodium exported protein (hyp10), unknown function	N/A	Biotin (K)	0	1	1	THKGENSMAQPIVNK	_THK(bi)GENSM(ox)AQPIVNK_;_THK(bi)GENSM(ox)AQPIVNK_;_THK(bi)GENSM(ox)AQPIVNK_;_THK(bi)GENSM(ox)AQPIVNK_;_THK(bi)GENSM(ox)AQPIVNK_;_THK(bi)GENSM(ox)AQPIVNK_;_THK(bi)GENSM(ox)AQPIVNK_;_THK(bi)GENSM(ox)AQPIVNK_;_THK(bi)GENSMAQPIVNK_;_THK(bi)GENSMAQPIVNK_;_THK(bi)GENSMAQPIVNK_;_THK(bi)GENSMAQPIVNK_;_THK(bi)GENSMAQPIVNK_;_THK(bi)GENSMAQPIVNK_	61	NA	0.215937	0.314513	0.171301	NA	NA	NA	21.6598	21.5282	21.4291	21.8516	21.7514	21.528	NA	NA	NA	NA	NA	NA
PF3D7_0114500	Plasmodium falciparum 3D7	Plasmodium exported protein (hyp10), unknown function	N/A	Biotin (K);Oxidation (M)	0	1	1	THKGENSMAQPIVNK	_THK(bi)GENSM(ox)AQPIVNK_;_THK(bi)GENSM(ox)AQPIVNK_;_THK(bi)GENSM(ox)AQPIVNK_;_THK(bi)GENSM(ox)AQPIVNK_;_THK(bi)GENSM(ox)AQPIVNK_;_THK(bi)GENSM(ox)AQPIVNK_;_THK(bi)GENSM(ox)AQPIVNK_;_THK(bi)GENSM(ox)AQPIVNK_;_THK(bi)GENSMAQPIVNK_;_THK(bi)GENSMAQPIVNK_;_THK(bi)GENSMAQPIVNK_;_THK(bi)GENSMAQPIVNK_;_THK(bi)GENSMAQPIVNK_;_THK(bi)GENSMAQPIVNK_	61	NA	0.809293	0.0405142	0.0742131	NA	NA	NA	18.9535	19.4936	19.2236	18.8411	19.665	19.3872	NA	NA	NA	NA	NA	NA
PF3D7_0115200	Plasmodium falciparum 3D7	rifin	RIF	Biotin (K)	0	1	3	IILKDKLDKELTEK	_IILKDK(bi)LDKELTEK_;_IILKDK(bi)LDKELTEK_;_IILKDK(bi)LDKELTEK_;_IILKDKLDKELTEK(bi)_	100;108	NA	0.484064	0.139409	0.280304	NA	NA	NA	20.7578	20.7955	20.7201	21.6672	20.409	21.0381	NA	NA	NA	NA	NA	NA
PF3D7_0200300	Plasmodium falciparum 3D7	erythrocyte membrane protein 1 (PfEMP1), exon 2	N/A	Biotin (K)	0	1	2	DICEQWKTKEDMLYK	_DICEQWKTKEDMLYK(bi)_;_DICEQWKTKEDMLYK(bi)_;_DICEQWKTKEDMLYK(bi)_;_DICEQWKTKEDMLYK(bi)_;_DICEQWKTKEDMLYK(bi)_	334	NA	NA	NA	NA	0.719752	0.0434872	0.114813	NA	NA	NA	NA	NA	NA	20.1403	20.7939	19.7747	20.3565	20.3457	20.3511
PF3D7_0200300	Plasmodium falciparum 3D7	erythrocyte membrane protein 1 (PfEMP1), exon 2	N/A	Biotin (K)	0	1	1	ENELFGTYHTKYTTFNSVSK	_ENELFGTYHTK(bi)YTTFNSVSK_;_ENELFGTYHTK(bi)YTTFNSVSK_;_ENELFGTYHTK(bi)YTTFNSVSK_;_ENELFGTYHTK(bi)YTTFNSVSK_;_ENELFGTYHTK(bi)YTTFNSVSK_;_ENELFGTYHTK(bi)YTTFNSVSK_;_ENELFGTYHTK(bi)YTTFNSVSK_;_ENELFGTYHTK(bi)YTTFNSVSK_	288	NA	NA	NA	NA	NA	NA	NA	NA	NA	NA	NA	NA	NA	NA	NA	NA	NA	NA	NA
PF3D7_0200300	Plasmodium falciparum 3D7	erythrocyte membrane protein 1 (PfEMP1), exon 2	N/A	Biotin (K);Oxidation (M)	0	1	1	TKEDMLYK	_TK(bi)EDM(ox)LYK_;_TK(bi)EDM(ox)LYK_;_TK(bi)EDM(ox)LYK_;_TK(bi)EDM(ox)LYK_;_TK(bi)EDM(ox)LYK_;_TK(bi)EDM(ox)LYK_;_TK(bi)EDM(ox)LYK_;_TK(bi)EDM(ox)LYK_;_TK(bi)EDM(ox)LYK_;_TK(bi)EDM(ox)LYK_;_TK(bi)EDM(ox)LYK_	328	NA	0.284924	0.251911	-0.150973	0.0256237	0.571282	0.494752	20.3279	20.5377	20.4818	20.2982	20.1161	20.4802	21.7263	21.5665	22.0458	22.2464	22.3183	22.2581
PF3D7_0201600	Plasmodium falciparum 3D7	PHISTb domain-containing RESA-like protein 1	RLP1	Biotin (K)	0	1	3	EIRDKPIKK	_EIRDKPIK(bi)K_;_EIRDK(bi)PIKK_;_EIRDK(bi)PIKK_;_EIRDKPIK(bi)K_;_EIRDK(bi)PIKK_;_EIRDK(bi)PIKK_;_EIRDK(bi)PIKK_;_EIRDK(bi)PIKK_;_EIRDKPIK(bi)K_;_EIRDKPIK(bi)K_;_EIRDKPIK(bi)K_;_EIRDKPIK(bi)K_;_EIRDK(bi)PIK(bi)K_;_EIRDK(bi)PIKK(bi)_;_EIRDK(bi)PIK(bi)K_;_EIRDK(bi)PIK(bi)K_	479;476;480	NA	0.0574661	0.602708	0.908231	NA	NA	NA	21.2191	20.4179	20.1177	21.6235	21.5608	21.295	NA	NA	NA	NA	NA	NA
PF3D7_0201600	Plasmodium falciparum 3D7	PHISTb domain-containing RESA-like protein 1	RLP1	2 Biotin (K)	0	2	3	EIRDKPIKK	_EIRDKPIK(bi)K_;_EIRDK(bi)PIKK_;_EIRDK(bi)PIKK_;_EIRDKPIK(bi)K_;_EIRDK(bi)PIKK_;_EIRDK(bi)PIKK_;_EIRDK(bi)PIKK_;_EIRDK(bi)PIKK_;_EIRDKPIK(bi)K_;_EIRDKPIK(bi)K_;_EIRDKPIK(bi)K_;_EIRDKPIK(bi)K_;_EIRDK(bi)PIK(bi)K_;_EIRDK(bi)PIKK(bi)_;_EIRDK(bi)PIK(bi)K_;_EIRDK(bi)PIK(bi)K_	479;476;480	NA	NA	NA	NA	NA	NA	NA	NA	NA	NA	NA	NA	NA	NA	NA	NA	NA	NA	NA
PF3D7_0201600	Plasmodium falciparum 3D7	PHISTb domain-containing RESA-like protein 1	RLP1	Biotin (K)	0	1	3	FKAEEFYEKNPDLVTYKGCHFLNSLK	_FKAEEFYEKNPDLVTYK(bi)GCHFLNSLK_;_FKAEEFYEKNPDLVTYK(bi)GCHFLNSLK_	338	NA	NA	NA	NA	NA	NA	NA	NA	NA	NA	NA	NA	NA	NA	NA	NA	NA	NA	NA
PF3D7_0201600	Plasmodium falciparum 3D7	PHISTb domain-containing RESA-like protein 1	RLP1	Biotin (K)	0	1	2	SEKLIDDKWK	_SEK(bi)LIDDKWK_;_SEK(bi)LIDDKWK_;_SEK(bi)LIDDKWK_;_SEK(bi)LIDDKWK_;_SEK(bi)LIDDKWK_	459	NA	0.486103	0.138483	0.112976	NA	NA	NA	21.5921	21.6464	21.7007	21.6587	22.0434	21.576	NA	NA	NA	NA	NA	NA
PF3D7_0201600	Plasmodium falciparum 3D7	PHISTb domain-containing RESA-like protein 1	RLP1	Biotin (K)	0	1	3	SEKLIDDKWKK	_SEK(bi)LIDDKWKK_;_SEK(bi)LIDDKWKK_;_SEK(bi)LIDDKWKK_;_SEK(bi)LIDDKWKK_;_SEK(bi)LIDDKWKK_	459	NA	0.377568	0.18329	0.169958	NA	NA	NA	20.0539	20.595	20.451	20.6347	20.4385	20.5366	NA	NA	NA	NA	NA	NA
PF3D7_0201700	Plasmodium falciparum 3D7	DnaJ protein, putative	N/A	Biotin (K)	0	1	3	KKQEENLSMVEGLNCFEENHKIICIK	_KKQEENLSMVEGLNCFEENHK(bi)IICIK_;_KKQEENLSMVEGLNCFEENHK(bi)IICIK_;_KKQEENLSMVEGLNCFEENHK(bi)IICIK_;_KKQEENLSMVEGLNCFEENHK(bi)IICIK_	317	NA	NA	NA	NA	NA	NA	NA	NA	NA	NA	NA	NA	NA	NA	NA	NA	NA	NA	NA
PF3D7_0201800	Plasmodium falciparum 3D7	knob associated heat shock protein 40	KAHsp40	Biotin (K)	0	1	1	FFKTETK	_FFK(bi)TETK_;_FFK(bi)TETK_;_FFK(bi)TETK_;_FFK(bi)TETK_;_FFK(bi)TETK_;_FFK(bi)TETK_;_FFK(bi)TETK_;_FFK(bi)TETK_;_FFK(bi)TETK_;_FFK(bi)TETK_;_FFK(bi)TETK_;_FFK(bi)TETK_	187	NA	0.541778	0.116832	-0.151592	0.944213	0.0109965	0.0126419	22.7679	22.5432	23.0296	22.2777	22.8654	22.7428	23.7275	23.9399	24.1804	24.1778	23.8661	23.8418
PF3D7_0201800	Plasmodium falciparum 3D7	knob associated heat shock protein 40	KAHsp40	Biotin (K)	0	1	2	RTDPNDVFSKFFK	_RTDPNDVFSK(bi)FFK_;_RTDPNDVFSK(bi)FFK_;_RTDPNDVFSK(bi)FFK_;_RTDPNDVFSK(bi)FFK_;_RTDPNDVFSK(bi)FFK_;_RTDPNDVFSK(bi)FFK_;_RTDPNDVFSK(bi)FFK_;_RTDPNDVFSK(bi)FFK_;_RTDPNDVFSK(bi)FFK_;_RTDPNDVFSK(bi)FFK_;_RTDPNDVFSK(bi)FFK_;_RTDPNDVFSK(bi)FFK_;_RTDPNDVFSK(bi)FFK_;_RTDPNDVFSK(bi)FFK_;_RTDPNDVFSK(bi)FFK_;_RTDPNDVFSK(bi)FFK_;_RTDPNDVFSK(bi)FFK_;_RTDPNDVFSK(bi)FFK_;_RTDPNDVFSK(bi)FFK_;_RTDPNDVFSK(bi)FFK_…	184	NA	0.876742	0.0294226	-0.0628022	0.936141	0.0109965	0.0463019	23.0584	23.9258	23.9585	23.2067	24.0294	23.5181	24.3816	24.0721	24.7794	23.8101	25.4477	24.1142
PF3D7_0201800	Plasmodium falciparum 3D7	knob associated heat shock protein 40	KAHsp40	Biotin (K)	0	1	3	RTDPNDVFSKFFKTETK	_RTDPNDVFSK(bi)FFKTETK_;_RTDPNDVFSKFFK(bi)TETK_;_RTDPNDVFSK(bi)FFKTETK_;_RTDPNDVFSK(bi)FFKTETK_;_RTDPNDVFSKFFK(bi)TETK_;_RTDPNDVFSK(bi)FFKTETK_;_RTDPNDVFSK(bi)FFK(bi)TETK_;_RTDPNDVFSK(bi)FFK(bi)TETK_	184;187	NA	0.00857849	0.991489	2.61087	NA	NA	NA	19.9127	18.8149	18.5313	22.1928	21.8579	21.0408	NA	NA	NA	NA	NA	NA
PF3D7_0201800	Plasmodium falciparum 3D7	knob associated heat shock protein 40	KAHsp40	2 Biotin (K)	0	2	3	RTDPNDVFSKFFKTETK	_RTDPNDVFSK(bi)FFKTETK_;_RTDPNDVFSKFFK(bi)TETK_;_RTDPNDVFSK(bi)FFKTETK_;_RTDPNDVFSK(bi)FFKTETK_;_RTDPNDVFSKFFK(bi)TETK_;_RTDPNDVFSK(bi)FFKTETK_;_RTDPNDVFSK(bi)FFK(bi)TETK_;_RTDPNDVFSK(bi)FFK(bi)TETK_	184;187	NA	NA	NA	NA	NA	NA	NA	NA	NA	NA	NA	NA	NA	NA	NA	NA	NA	NA	NA
PF3D7_0201800	Plasmodium falciparum 3D7	knob associated heat shock protein 40	KAHsp40	Biotin (K)	0	1	1	TDPNDVFSKFFK	_TDPNDVFSK(bi)FFK_;_TDPNDVFSK(bi)FFK_;_TDPNDVFSK(bi)FFK_;_TDPNDVFSK(bi)FFK_;_TDPNDVFSK(bi)FFK_;_TDPNDVFSK(bi)FFK_;_TDPNDVFSK(bi)FFK_;_TDPNDVFSK(bi)FFK_;_TDPNDVFSK(bi)FFK_;_TDPNDVFSK(bi)FFK_;_TDPNDVFSK(bi)FFK_;_TDPNDVFSK(bi)FFK_;_TDPNDVFSK(bi)FFK_;_TDPNDVFSK(bi)FFK_;_TDPNDVFSK(bi)FFK_;_TDPNDVFSK(bi)FFK_;_TDPNDVFSK(bi)FFK_;_TDPNDVFSK(bi)FFK_;_TDPNDVFSK(bi)FFK_;_TDPNDVFSK(bi)FFK_;_TDPNDVFSK(bi)FFK_;…	184	NA	0.849522	0.0321309	0.0605744	0.104809	0.30554	-0.388711	24.3015	25.0328	24.8342	24.3767	25.0294	24.9441	25.4778	25.3077	25.321	25.1	25.21	24.6303
PF3D7_0201800	Plasmodium falciparum 3D7	knob associated heat shock protein 40	KAHsp40	Biotin (K)	0	1	2	TDPNDVFSKFFKTETK	_TDPNDVFSKFFK(bi)TETK_;_TDPNDVFSK(bi)FFKTETK_;_TDPNDVFSKFFK(bi)TETK_;_TDPNDVFSKFFK(bi)TETK_;_TDPNDVFSK(bi)FFKTETK_	187;184	NA	0.0179377	0.819786	1.88163	NA	NA	NA	19.9216	19.6853	20.1578	20.9957	22.6107	21.8032	NA	NA	NA	NA	NA	NA
PF3D7_0201800	Plasmodium falciparum 3D7	knob associated heat shock protein 40	KAHsp40	Biotin (K)	0	1	1	WHPDKHLNAASK	_WHPDK(bi)HLNAASK_;_WHPDK(bi)HLNAASK_;_WHPDK(bi)HLNAASK_;_WHPDK(bi)HLNAASK_;_WHPDK(bi)HLNAASK_;_WHPDK(bi)HLNAASK_;_WHPDK(bi)HLNAASK_;_WHPDK(bi)HLNAASK_;_WHPDK(bi)HLNAASK_	119	NA	NA	NA	NA	0.174952	0.21568	-0.252705	NA	NA	NA	NA	NA	NA	22.2926	22.3317	22.5605	22.3997	22.0184	22.0088
PF3D7_0201800	Plasmodium falciparum 3D7	knob associated heat shock protein 40	KAHsp40	Biotin (K)	0	1	2	WHPDKHLNAASKK	_WHPDK(bi)HLNAASKK_;_WHPDK(bi)HLNAASKK_;_WHPDK(bi)HLNAASKK_;_WHPDK(bi)HLNAASKK_;_WHPDK(bi)HLNAASKK_;_WHPDK(bi)HLNAASKK_;_WHPDK(bi)HLNAASKK_;_WHPDK(bi)HLNAASKK_;_WHPDK(bi)HLNAASKK_;_WHPDK(bi)HLNAASKK_;_WHPDK(bi)HLNAASKK_;_WHPDK(bi)HLNAASKK_;_WHPDK(bi)HLNAASKK_;_WHPDK(bi)HLNAASKK_	119	NA	0.932429	0.0163674	-0.0800656	0.330832	0.143109	-0.53979	23.9779	23.7697	22.0131	23.7771	21.911	23.8325	21.8515	22.2354	22.0435	22.3271	21.5037	20.6803
PF3D7_0201900	Plasmodium falciparum 3D7	erythrocyte membrane protein 3	EMP3	Biotin (K)	0	1	1	AHENLEEYNETDLAKGK	_AHENLEEYNETDLAK(bi)GK_;_AHENLEEYNETDLAK(bi)GK_;_AHENLEEYNETDLAK(bi)GK_;_AHENLEEYNETDLAK(bi)GK_;_AHENLEEYNETDLAK(bi)GK_;_AHENLEEYNETDLAK(bi)GK_	821;843;865;931;953;975	NA	0.158458	0.386971	-0.331269	NA	NA	NA	21.5953	21.9103	21.4646	21.0502	21.4861	21.44	NA	NA	NA	NA	NA	NA
PF3D7_0201900	Plasmodium falciparum 3D7	erythrocyte membrane protein 3	EMP3	Biotin (K)	0	1	2	AHENLEEYNETDLAKGKEVTNK	_AHENLEEYNETDLAK(bi)GKEVTNK_;_AHENLEEYNETDLAK(bi)GKEVTNK_;_AHENLEEYNETDLAKGK(bi)EVTNK_;_AHENLEEYNETDLAK(bi)GKEVTNK_;_AHENLEEYNETDLAK(bi)GKEVTNK_;_AHENLEEYNETDLAKGK(bi)EVTNK_;_AHENLEEYNETDLAK(bi)GKEVTNK_;_AHENLEEYNETDLAK(bi)GKEVTNK_;_AHENLEEYNETDLAK(bi)GKEVTNK_;_AHENLEEYNETDLAKGK(bi)EVTNK_;_AHENLEEYNETDLAKGK(bi)EVTNK_;_AHENLEEYNETDLAK(bi)GKEVTNK_;_AHENLEEYNETDLAKGK(bi)EVTNK_;_AHENLEEYNETDLAK(bi)GK…	821;843;865;931;953;975;823;845;867;933;955;977	NA	0.828092	0.0349703	-0.0737622	NA	NA	NA	22.9216	23.1329	22.447	22.7986	23.1643	22.3173	NA	NA	NA	NA	NA	NA
PF3D7_0201900	Plasmodium falciparum 3D7	erythrocyte membrane protein 3	EMP3	Biotin (K)	0	1	3	ARENLEEYEEKDYMKNNELQNK	_ARENLEEYEEKDYMK(bi)NNELQNK_	1063	NA	NA	NA	NA	NA	NA	NA	NA	NA	NA	NA	NA	NA	NA	NA	NA	NA	NA	NA
PF3D7_0201900	Plasmodium falciparum 3D7	erythrocyte membrane protein 3	EMP3	Biotin (K)	0	1	2	ARENLEEYNETDLAKGK	_ARENLEEYNETDLAK(bi)GK_;_ARENLEEYNETDLAK(bi)GK_;_ARENLEEYNETDLAK(bi)GK_;_ARENLEEYNETDLAKGK(bi)_;_ARENLEEYNETDLAK(bi)GK_;_ARENLEEYNETDLAK(bi)GK_;_ARENLEEYNETDLAK(bi)GK_	887;909;997;1019;1041;889;911;999;1021;1043	NA	0.323523	0.22277	-0.224609	NA	NA	NA	21.3142	21.9624	21.6088	21.2677	21.453	21.4909	NA	NA	NA	NA	NA	NA
PF3D7_0201900	Plasmodium falciparum 3D7	erythrocyte membrane protein 3	EMP3	Biotin (K)	0	1	3	ARENLEEYNETDLAKGKEVTNK	_ARENLEEYNETDLAKGK(bi)EVTNK_;_ARENLEEYNETDLAK(bi)GKEVTNK_;_ARENLEEYNETDLAK(bi)GKEVTNK_;_ARENLEEYNETDLAK(bi)GKEVTNK_;_ARENLEEYNETDLAKGK(bi)EVTNK_;_ARENLEEYNETDLAKGK(bi)EVTNK_;_ARENLEEYNETDLAKGK(bi)EVTNK_;_ARENLEEYNETDLAKGK(bi)EVTNK_;_ARENLEEYNETDLAK(bi)GKEVTNK_;_ARENLEEYNETDLAK(bi)GKEVTNK_;_ARENLEEYNETDLAK(bi)GKEVTNK_;_ARENLEEYNETDLAK(bi)GKEVTNK_;_ARENLEEYNETDLAKGK(bi)EVTNK_;_ARENLEEYNETDLAK(bi)GK…	889;911;999;1021;1043;887;909;997;1019;1041	NA	0.0753	0.54962	0.476184	NA	NA	NA	22.7303	22.9562	22.6403	23.4103	23.4444	22.9006	NA	NA	NA	NA	NA	NA
PF3D7_0201900	Plasmodium falciparum 3D7	erythrocyte membrane protein 3	EMP3	Biotin (K)	0	1	3	ASKGQQNNDLENDGLKHKPNQGQK	_ASK(bi)GQQNNDLENDGLKHKPNQGQK_;_ASK(bi)GQQNNDLENDGLKHKPNQGQK_;_ASK(bi)GQQNNDLENDGLKHKPNQGQK_;_ASK(bi)GQQNNDLENDGLKHKPNQGQK_	2375	NA	0.0356328	0.688744	-0.292252	NA	NA	NA	19.5969	19.4958	19.698	19.3047	19.4318	19.1776	NA	NA	NA	NA	NA	NA
PF3D7_0201900	Plasmodium falciparum 3D7	erythrocyte membrane protein 3	EMP3	Biotin (K)	0	1	1	DELPEYEKGHVSR	_DELPEYEK(bi)GHVSR_;_DELPEYEK(bi)GHVSR_;_DELPEYEK(bi)GHVSR_;_DELPEYEK(bi)GHVSR_;_DELPEYEK(bi)GHVSR_	618;640	NA	0.148786	0.400599	0.236285	NA	NA	NA	19.8955	20.0532	19.9744	20.4259	19.9954	20.2106	NA	NA	NA	NA	NA	NA
PF3D7_0201900	Plasmodium falciparum 3D7	erythrocyte membrane protein 3	EMP3	Biotin (K)	0	1	2	EFIKQHLKDYEER	_EFIKQHLK(bi)DYEER_;_EFIKQHLK(bi)DYEER_;_EFIKQHLK(bi)DYEER_;_EFIKQHLK(bi)DYEER_	229	NA	NA	NA	NA	NA	NA	NA	NA	NA	NA	NA	NA	NA	NA	NA	NA	NA	NA	NA
PF3D7_0201900	Plasmodium falciparum 3D7	erythrocyte membrane protein 3	EMP3	Biotin (K)	0	1	1	EKFPTTR	_EK(bi)FPTTR_;_EK(bi)FPTTR_;_EK(bi)FPTTR_;_EK(bi)FPTTR_;_EK(bi)FPTTR_	380	NA	0.421512	0.16637	-0.216899	NA	NA	NA	23.8117	23.9166	23.7068	23.151	23.9494	23.6839	NA	NA	NA	NA	NA	NA
PF3D7_0201900	Plasmodium falciparum 3D7	erythrocyte membrane protein 3	EMP3	Biotin (K)	0	1	1	ELLNKDIR	_ELLNK(bi)DIR_;_ELLNK(bi)DIR_	1309	NA	NA	NA	NA	NA	NA	NA	NA	NA	NA	NA	NA	NA	NA	NA	NA	NA	NA	NA
PF3D7_0201900	Plasmodium falciparum 3D7	erythrocyte membrane protein 3	EMP3	Biotin (K)	0	1	2	ELLNKDISNKDMK	_ELLNK(bi)DISNKDMK_;_ELLNK(bi)DISNKDMK_;_ELLNK(bi)DISNKDMK_;_ELLNK(bi)DISNKDMK_;_ELLNK(bi)DISNKDMK_	1279	NA	0.0384449	0.683994	-0.466405	NA	NA	NA	21.2779	21.0542	20.7671	20.4952	20.5666	20.6381	NA	NA	NA	NA	NA	NA
PF3D7_0201900	Plasmodium falciparum 3D7	erythrocyte membrane protein 3	EMP3	Biotin (K)	0	1	2	ELQNKGSEGLKENAELK	_ELQNK(bi)GSEGLKENAELK_;_ELQNK(bi)GSEGLKENAELK_;_ELQNK(bi)GSEGLKENAELK_;_ELQNK(bi)GSEGLKENAELK_;_ELQNK(bi)GSEGLKENAELK_;_ELQNK(bi)GSEGLKENAELK_	1127;1146;1184;1203;1222	NA	0.0544154	0.613649	-0.861776	NA	NA	NA	22.1435	22.3188	22.0579	20.9125	21.0992	21.9232	NA	NA	NA	NA	NA	NA
PF3D7_0201900	Plasmodium falciparum 3D7	erythrocyte membrane protein 3	EMP3	Biotin (K)	0	1	1	ENLEEYNETDLAKGK	_ENLEEYNETDLAK(bi)GK_;_ENLEEYNETDLAK(bi)GK_;_ENLEEYNETDLAK(bi)GK_;_ENLEEYNETDLAK(bi)GK_	733;799;821;843;865;887;909;931;953;975;997;1019;1041	NA	NA	NA	NA	NA	NA	NA	NA	NA	NA	NA	NA	NA	NA	NA	NA	NA	NA	NA
PF3D7_0201900	Plasmodium falciparum 3D7	erythrocyte membrane protein 3	EMP3	Biotin (K)	0	1	2	ENLEEYNETDLAKGKEVTNK	_ENLEEYNETDLAK(bi)GKEVTNK_;_ENLEEYNETDLAK(bi)GKEVTNK_;_ENLEEYNETDLAK(bi)GKEVTNK_;_ENLEEYNETDLAK(bi)GKEVTNK_;_ENLEEYNETDLAK(bi)GKEVTNK_;_ENLEEYNETDLAKGK(bi)EVTNK_;_ENLEEYNETDLAK(bi)GKEVTNK_;_ENLEEYNETDLAK(bi)GKEVTNK_	733;799;821;843;865;887;909;931;953;975;997;1019;1041;735;801;823;845;867;889;911;933;955;977;999;1021;1043	NA	0.31024	0.232262	0.454333	NA	NA	NA	21.4656	21.763	22.0605	22.9172	21.9279	21.807	NA	NA	NA	NA	NA	NA
PF3D7_0201900	Plasmodium falciparum 3D7	erythrocyte membrane protein 3	EMP3	Biotin (K)	0	1	1	EVTNKAHENLEEYNETDLAK	_EVTNK(bi)AHENLEEYNETDLAK_;_EVTNK(bi)AHENLEEYNETDLAK_;_EVTNK(bi)AHENLEEYNETDLAK_;_EVTNK(bi)AHENLEEYNETDLAK_;_EVTNK(bi)AHENLEEYNETDLAK_	806;828;850;916;938;960	NA	0.521285	0.126064	-0.149555	NA	NA	NA	20.9643	20.8095	20.8869	20.3766	20.7373	21.098	NA	NA	NA	NA	NA	NA
PF3D7_0201900	Plasmodium falciparum 3D7	erythrocyte membrane protein 3	EMP3	Biotin (K)	0	1	1	EYQLDNEGPSTLKEYDQTELAK	_EYQLDNEGPSTLK(bi)EYDQTELAK_;_EYQLDNEGPSTLK(bi)EYDQTELAK_;_EYQLDNEGPSTLK(bi)EYDQTELAK_;_EYQLDNEGPSTLK(bi)EYDQTELAK_;_EYQLDNEGPSTLK(bi)EYDQTELAK_;_EYQLDNEGPSTLK(bi)EYDQTELAK_	658	NA	0.102252	0.49571	-0.235197	NA	NA	NA	22.584	22.6826	22.4854	22.3488	22.5145	22.1831	NA	NA	NA	NA	NA	NA
PF3D7_0201900	Plasmodium falciparum 3D7	erythrocyte membrane protein 3	EMP3	Biotin (K)	0	1	2	EYQLDNEVRDELPEYEKGHVSR	_EYQLDNEVRDELPEYEK(bi)GHVSR_;_EYQLDNEVRDELPEYEK(bi)GHVSR_;_EYQLDNEVRDELPEYEK(bi)GHVSR_;_EYQLDNEVRDELPEYEK(bi)GHVSR_;_EYQLDNEVRDELPEYEK(bi)GHVSR_;_EYQLDNEVRDELPEYEK(bi)GHVSR_;_EYQLDNEVRDELPEYEK(bi)GHVSR_;_EYQLDNEVRDELPEYEK(bi)GHVSR_;_EYQLDNEVRDELPEYEK(bi)GHVSR_;_EYQLDNEVRDELPEYEK(bi)GHVSR_;_EYQLDNEVRDELPEYEK(bi)GHVSR_	618;640	NA	0.633175	0.0830016	0.115914	0.107935	0.30554	-0.517049	22.4863	22.7174	22.7133	22.5268	23.1771	22.5608	21.6854	21.9622	21.2533	20.8705	21.1166	21.3627
PF3D7_0201900	Plasmodium falciparum 3D7	erythrocyte membrane protein 3	EMP3	Biotin (K)	0	1	2	GKDITNKPHESVDEYDQSELAK	_GK(bi)DITNKPHESVDEYDQSELAK_	669	NA	NA	NA	NA	NA	NA	NA	NA	NA	NA	NA	NA	NA	NA	NA	NA	NA	NA	NA
PF3D7_0201900	Plasmodium falciparum 3D7	erythrocyte membrane protein 3	EMP3	Biotin (K)	0	1	3	GKDITNKPHESVDEYDQTELAKGK	_GKDITNKPHESVDEYDQTELAK(bi)GK_	711;777	NA	NA	NA	NA	NA	NA	NA	NA	NA	NA	NA	NA	NA	NA	NA	NA	NA	NA	NA
PF3D7_0201900	Plasmodium falciparum 3D7	erythrocyte membrane protein 3	EMP3	Biotin (K)	0	1	2	GKEVTNKAHENLEEYNETDLAK	_GKEVTNK(bi)AHENLEEYNETDLAK_;_GKEVTNK(bi)AHENLEEYNETDLAK_;_GKEVTNK(bi)AHENLEEYNETDLAK_;_GKEVTNK(bi)AHENLEEYNETDLAK_;_GKEVTNK(bi)AHENLEEYNETDLAK_;_GKEVTNK(bi)AHENLEEYNETDLAK_;_GKEVTNK(bi)AHENLEEYNETDLAK_;_GKEVTNK(bi)AHENLEEYNETDLAK_;_GKEVTNK(bi)AHENLEEYNETDLAK_;_GKEVTNK(bi)AHENLEEYNETDLAK_;_GKEVTNK(bi)AHENLEEYNETDLAK_	806;828;850;916;938;960	NA	0.526225	0.124193	0.244954	NA	NA	NA	21.4294	22.5955	22.2132	22.3033	22.4786	22.191	NA	NA	NA	NA	NA	NA
PF3D7_0201900	Plasmodium falciparum 3D7	erythrocyte membrane protein 3	EMP3	Biotin (K)	0	1	2	GKEVTNKAR	_GKEVTNK(bi)AR_;_GKEVTNK(bi)AR_;_GKEVTNK(bi)AR_;_GKEVTNK(bi)AR_;_GKEVTNK(bi)AR_;_GKEVTNK(bi)AR_;_GKEVTNK(bi)AR_;_GKEVTNK(bi)AR_;_GKEVTNK(bi)AR_	872;894;982;1004;1026;1048	NA	0.538042	0.118785	-0.152366	NA	NA	NA	20.0807	20.0687	20.3526	19.6236	20.0954	20.3259	NA	NA	NA	NA	NA	NA
PF3D7_0201900	Plasmodium falciparum 3D7	erythrocyte membrane protein 3	EMP3	Biotin (K)	0	1	2	GKEVTNKPHENLEEYNETDLAK	_GK(bi)EVTNKPHENLEEYNETDLAK_;_GK(bi)EVTNKPHENLEEYNETDLAK_;_GK(bi)EVTNKPHENLEEYNETDLAK_;_GK(bi)EVTNKPHENLEEYNETDLAK_;_GK(bi)EVTNKPHENLEEYNETDLAK_;_GK(bi)EVTNKPHENLEEYNETDLAK_;_GK(bi)EVTNKPHENLEEYNETDLAK_	713;779	NA	0.568852	0.105193	-0.102213	NA	NA	NA	20.8132	21.0499	20.5764	20.7078	20.8722	20.5528	NA	NA	NA	NA	NA	NA
PF3D7_0201900	Plasmodium falciparum 3D7	erythrocyte membrane protein 3	EMP3	Biotin (K)	0	1	1	GLKEYEESHVAK	_GLK(bi)EYEESHVAK_;_GLK(bi)EYEESHVAK_;_GLK(bi)EYEESHVAK_	570	NA	NA	NA	NA	NA	NA	NA	NA	NA	NA	NA	NA	NA	NA	NA	NA	NA	NA	NA
PF3D7_0201900	Plasmodium falciparum 3D7	erythrocyte membrane protein 3	EMP3	Biotin (K)	0	1	3	GLKEYEESHVAKDYQLEHEPPTKLPEYEK	_GLKEYEESHVAK(bi)DYQLEHEPPTKLPEYEK_	579	NA	NA	NA	NA	NA	NA	NA	NA	NA	NA	NA	NA	NA	NA	NA	NA	NA	NA	NA
PF3D7_0201900	Plasmodium falciparum 3D7	erythrocyte membrane protein 3	EMP3	Biotin (K)	0	1	1	GMKDEVDEWIK	_GMK(bi)DEVDEWIK_;_GMK(bi)DEVDEWIK_;_GMK(bi)DEVDEWIK_;_GMK(bi)DEVDEWIK_;_GMK(bi)DEVDEWIK_;_GMK(bi)DEVDEWIK_;_GMK(bi)DEVDEWIK_;_GMK(bi)DEVDEWIK_;_GMK(bi)DEVDEWIK_;_GMK(bi)DEVDEWIK_	290	NA	0.391135	0.179984	-0.349612	NA	NA	NA	20.8104	21.9325	21.2563	20.6822	21.0336	21.2346	NA	NA	NA	NA	NA	NA
PF3D7_0201900	Plasmodium falciparum 3D7	erythrocyte membrane protein 3	EMP3	Biotin (K)	0	1	2	GMKDEVDEWIKK	_GMK(bi)DEVDEWIKK_;_GMK(bi)DEVDEWIKK_;_GMK(bi)DEVDEWIKK_;_GMK(bi)DEVDEWIKK_	290	NA	NA	NA	NA	NA	NA	NA	NA	NA	NA	NA	NA	NA	NA	NA	NA	NA	NA	NA
PF3D7_0201900	Plasmodium falciparum 3D7	erythrocyte membrane protein 3	EMP3	Biotin (K)	0	1	1	GQQNTGLKNAPNER	_GQQNTGLK(bi)NAPNER_;_GQQNTGLK(bi)NAPNER_;_GQQNTGLK(bi)NAPNER_;_GQQNTGLK(bi)NAPNER_;_GQQNTGLK(bi)NAPNER_	1538;1603	NA	NA	NA	NA	NA	NA	NA	NA	NA	NA	NA	NA	NA	NA	NA	NA	NA	NA	NA
PF3D7_0201900	Plasmodium falciparum 3D7	erythrocyte membrane protein 3	EMP3	Biotin (K)	0	1	1	GQQNTGLKNTPNEGQQNTGLK	_GQQNTGLK(bi)NTPNEGQQNTGLK_;_GQQNTGLK(bi)NTPNEGQQNTGLK_;_GQQNTGLK(bi)NTPNEGQQNTGLK_	1759;1837;1915;2032;2331	NA	NA	NA	NA	NA	NA	NA	NA	NA	NA	NA	NA	NA	NA	NA	NA	NA	NA	NA
PF3D7_0201900	Plasmodium falciparum 3D7	erythrocyte membrane protein 3	EMP3	Biotin (K)	0	1	1	GQQNTGLKNTPNER	_GQQNTGLK(bi)NTPNER_;_GQQNTGLK(bi)NTPNER_	1343;1382;1434;1473;1577;1707;1733;1811;1954;2097	NA	NA	NA	NA	NA	NA	NA	NA	NA	NA	NA	NA	NA	NA	NA	NA	NA	NA	NA
PF3D7_0201900	Plasmodium falciparum 3D7	erythrocyte membrane protein 3	EMP3	Biotin (K)	0	1	1	GSEGLKENAELK	_GSEGLK(bi)ENAELK_;_GSEGLK(bi)ENAELK_;_GSEGLK(bi)ENAELK_	1133;1152;1171;1190;1209;1228	NA	NA	NA	NA	NA	NA	NA	NA	NA	NA	NA	NA	NA	NA	NA	NA	NA	NA	NA
PF3D7_0201900	Plasmodium falciparum 3D7	erythrocyte membrane protein 3	EMP3	Biotin (K)	0	1	2	GSEGLKENAELKNK	_GSEGLKENAELK(bi)NK_;_GSEGLKENAELK(bi)NK_;_GSEGLKENAELK(bi)NK_;_GSEGLKENAELK(bi)NK_;_GSEGLKENAELK(bi)NK_;_GSEGLKENAELK(bi)NK_	1139;1158;1177;1196;1215;1234	NA	0.162024	0.379405	-0.690489	NA	NA	NA	21.033	21.5885	20.9087	19.808	20.7161	20.9345	NA	NA	NA	NA	NA	NA
PF3D7_0201900	Plasmodium falciparum 3D7	erythrocyte membrane protein 3	EMP3	Biotin (K)	0	1	3	GSEGLKENAELKNKELQNK	_GSEGLKENAELKNK(bi)ELQNK_;_GSEGLKENAELKNK(bi)ELQNK_;_GSEGLKENAELK(bi)NKELQNK_;_GSEGLKENAELK(bi)NKELQNK_;_GSEGLKENAELK(bi)NKELQNK_;_GSEGLKENAELK(bi)NKELQNK_;_GSEGLKENAELK(bi)NKELQNK_;_GSEGLKENAELK(bi)NKELQNK_;_GSEGLKENAELK(bi)NKELQNK_;_GSEGLKENAELK(bi)NKELQNK_	1141;1179;1198;1217;1139;1177;1196;1215	NA	0.0389432	0.683994	-1.67757	NA	NA	NA	23.0134	22.8407	21.7573	20.8596	20.1823	21.5368	NA	NA	NA	NA	NA	NA
PF3D7_0201900	Plasmodium falciparum 3D7	erythrocyte membrane protein 3	EMP3	Biotin (K)	0	1	3	GSEGLKENAELKNKELR	_GSEGLKENAELK(bi)NKELR_;_GSEGLKENAELK(bi)NKELR_;_GSEGLKENAELKNK(bi)ELR_;_GSEGLKENAELK(bi)NKELR_	1158;1234;1160;1236	NA	NA	NA	NA	NA	NA	NA	NA	NA	NA	NA	NA	NA	NA	NA	NA	NA	NA	NA
PF3D7_0201900	Plasmodium falciparum 3D7	erythrocyte membrane protein 3	EMP3	Biotin (K)	0	1	1	HTELNNKNLK	_HTELNNK(bi)NLK_;_HTELNNK(bi)NLK_;_HTELNNK(bi)NLK_;_HTELNNK(bi)NLK_;_HTELNNK(bi)NLK_;_HTELNNK(bi)NLK_	2403	NA	0.319185	0.226206	-0.984112	NA	NA	NA	21.0214	21.2425	21.2507	18.472	21.2038	20.8864	NA	NA	NA	NA	NA	NA
PF3D7_0201900	Plasmodium falciparum 3D7	erythrocyte membrane protein 3	EMP3	Biotin (K)	0	1	3	HTELNNKNLKNKPTDGLK	_HTELNNKNLK(bi)NKPTDGLK_	2406	NA	NA	NA	NA	NA	NA	NA	NA	NA	NA	NA	NA	NA	NA	NA	NA	NA	NA	NA
PF3D7_0201900	Plasmodium falciparum 3D7	erythrocyte membrane protein 3	EMP3	Biotin (K)	0	1	1	KDNELAVSGDCMDSK	_K(bi)DNELAVSGDCMDSK_;_K(bi)DNELAVSGDCMDSK_;_K(bi)DNELAVSGDCMDSK_;_K(bi)DNELAVSGDCMDSK_;_K(bi)DNELAVSGDCMDSK_;_K(bi)DNELAVSGDCMDSK_	466	NA	0.976482	0.0048509	0.00471111	NA	NA	NA	20.9701	21.3567	21.0957	20.9497	21.2375	21.2495	NA	NA	NA	NA	NA	NA
PF3D7_0201900	Plasmodium falciparum 3D7	erythrocyte membrane protein 3	EMP3	Biotin (K)	0	1	2	KDNELAVSGDCMDSKVNGK	_K(bi)DNELAVSGDCMDSKVNGK_;_K(bi)DNELAVSGDCMDSKVNGK_;_KDNELAVSGDCMDSK(bi)VNGK_;_K(bi)DNELAVSGDCMDSKVNGK_;_KDNELAVSGDCMDSK(bi)VNGK_;_K(bi)DNELAVSGDCMDSKVNGK_;_KDNELAVSGDCMDSK(bi)VNGK_;_K(bi)DNELAVSGDCMDSKVNGK_;_K(bi)DNELAVSGDCMDSKVNGK_;_KDNELAVSGDCMDSK(bi)VNGK_	466;480	NA	NA	NA	NA	NA	NA	NA	NA	NA	NA	NA	NA	NA	NA	NA	NA	NA	NA	NA
PF3D7_0201900	Plasmodium falciparum 3D7	erythrocyte membrane protein 3	EMP3	Biotin (K)	0	1	3	KLKSTFNPFKR	_K(bi)LKSTFNPFKR_;_K(bi)LKSTFNPFKR_;_K(bi)LKSTFNPFKR_;_K(bi)LKSTFNPFKR_;_K(bi)LKSTFNPFKR_;_K(bi)LKSTFNPFKR_	485	NA	0.236746	0.295861	-0.123202	NA	NA	NA	21.3815	21.2288	21.5347	21.2723	21.2486	21.2545	NA	NA	NA	NA	NA	NA
PF3D7_0201900	Plasmodium falciparum 3D7	erythrocyte membrane protein 3	EMP3	Biotin (K)	0	1	2	LKDSDDKVVVPVNK	_LKDSDDK(bi)VVVPVNK_;_LKDSDDK(bi)VVVPVNK_;_LKDSDDK(bi)VVVPVNK_;_LKDSDDK(bi)VVVPVNK_;_LKDSDDK(bi)VVVPVNK_;_LKDSDDK(bi)VVVPVNK_;_LKDSDDK(bi)VVVPVNK_;_LKDSDDK(bi)VVVPVNK_;_LKDSDDK(bi)VVVPVNK_;_LKDSDDK(bi)VVVPVNK_;_LKDSDDK(bi)VVVPVNK_;_LKDSDDK(bi)VVVPVNK_;_LKDSDDK(bi)VVVPVNK_	427	NA	0.850722	0.0321309	0.0228711	NA	NA	NA	24.2272	24.0834	23.9452	23.9568	24.2273	24.1402	NA	NA	NA	NA	NA	NA
PF3D7_0201900	Plasmodium falciparum 3D7	erythrocyte membrane protein 3	EMP3	Biotin (K)	0	1	3	LKDSDDKVVVPVNKNK	_LKDSDDKVVVPVNK(bi)NK_;_LKDSDDKVVVPVNK(bi)NK_;_LKDSDDKVVVPVNK(bi)NK_;_LKDSDDKVVVPVNKNK(bi)_;_LKDSDDKVVVPVNKNK(bi)_;_LKDSDDKVVVPVNK(bi)NK_;_LKDSDDKVVVPVNK(bi)NK_;_LKDSDDKVVVPVNK(bi)NK_;_LKDSDDKVVVPVNKNK(bi)_;_LKDSDDKVVVPVNK(bi)NK_;_LKDSDDKVVVPVNKNK(bi)_;_LKDSDDKVVVPVNK(bi)NK_;_LKDSDDKVVVPVNK(bi)NK_;_LKDSDDKVVVPVNK(bi)NK_;_LKDSDDKVVVPVNKNK(bi)_	434;436	NA	0.392528	0.179281	0.288548	NA	NA	NA	21.9694	21.2316	21.578	22.2826	21.8057	21.5564	NA	NA	NA	NA	NA	NA
PF3D7_0201900	Plasmodium falciparum 3D7	erythrocyte membrane protein 3	EMP3	Biotin (K)	0	1	2	LKSTFNPFKR	_LK(bi)STFNPFKR_;_LK(bi)STFNPFKR_;_LK(bi)STFNPFKR_;_LK(bi)STFNPFKR_;_LK(bi)STFNPFKR_;_LK(bi)STFNPFKR_	487	NA	0.119405	0.456421	-0.275856	NA	NA	NA	23.1534	22.8239	22.8209	22.6588	22.8042	22.5077	NA	NA	NA	NA	NA	NA
PF3D7_0201900	Plasmodium falciparum 3D7	erythrocyte membrane protein 3	EMP3	Biotin (K)	0	1	1	NAANKGQQNTGLK	_NAANK(bi)GQQNTGLK_;_NAANK(bi)GQQNTGLK_;_NAANK(bi)GQQNTGLK_;_NAANK(bi)GQQNTGLK_;_NAANK(bi)GQQNTGLK_;_NAANK(bi)GQQNTGLK_;_NAANK(bi)GQQNTGLK_;_NAANK(bi)GQQNTGLK_;_NAANK(bi)GQQNTGLK_;_NAANK(bi)GQQNTGLK_;_NAANK(bi)GQQNTGLK_;_NAANK(bi)GQQNTGLK_;_NAANK(bi)GQQNTGLK_;_NAANK(bi)GQQNTGLK_;_NAANK(bi)GQQNTGLK_;_NAANK(bi)GQQNTGLK_;_NAANK(bi)GQQNTGLK_;_NAANK(bi)GQQNTGLK_;_NAANK(bi)GQQNTGLK_	1452;1751;1829;1894;2024;2089;2206;2245;2284	NA	0.139841	0.417449	-0.440259	NA	NA	NA	23.2272	23.2788	23.4251	22.4305	22.9613	23.2185	NA	NA	NA	NA	NA	NA
PF3D7_0201900	Plasmodium falciparum 3D7	erythrocyte membrane protein 3	EMP3	Biotin (K)	0	1	2	NAANKGQQNTGLKNTPNEGQQNTGLK	_NAANKGQQNTGLK(bi)NTPNEGQQNTGLK_;_NAANKGQQNTGLK(bi)NTPNEGQQNTGLK_;_NAANKGQQNTGLK(bi)NTPNEGQQNTGLK_;_NAANKGQQNTGLK(bi)NTPNEGQQNTGLK_;_NAANKGQQNTGLK(bi)NTPNEGQQNTGLK_;_NAANK(bi)GQQNTGLKNTPNEGQQNTGLK_	1759;1837;2032;1751;1829;2024	NA	0.0636792	0.586202	-0.556696	NA	NA	NA	21.7225	21.3221	21.415	20.9298	21.2456	20.6141	NA	NA	NA	NA	NA	NA
PF3D7_0201900	Plasmodium falciparum 3D7	erythrocyte membrane protein 3	EMP3	Biotin (K)	0	1	3	NAANKGQQNTGLKNTPNEGQQNTGLKNTPSEGQQNTGLK	_NAANKGQQNTGLKNTPNEGQQNTGLK(bi)NTPSEGQQNTGLK_;_NAANKGQQNTGLK(bi)NTPNEGQQNTGLKNTPSEGQQNTGLK_	1772;1850;2045;1759;1837;2032	NA	NA	NA	NA	NA	NA	NA	NA	NA	NA	NA	NA	NA	NA	NA	NA	NA	NA	NA
PF3D7_0201900	Plasmodium falciparum 3D7	erythrocyte membrane protein 3	EMP3	Biotin (K)	0	1	2	NAANKGQQNTGLKNTPNER	_NAANKGQQNTGLK(bi)NTPNER_;_NAANKGQQNTGLK(bi)NTPNER_;_NAANK(bi)GQQNTGLKNTPNER_;_NAANKGQQNTGLK(bi)NTPNER_;_NAANK(bi)GQQNTGLKNTPNER_;_NAANKGQQNTGLK(bi)NTPNER_;_NAANKGQQNTGLK(bi)NTPNER_;_NAANKGQQNTGLK(bi)NTPNER_	2097;2089	NA	0.0695404	0.569718	0.833136	NA	NA	NA	19.5052	19.9527	19.7289	20.4327	21.1568	20.0968	NA	NA	NA	NA	NA	NA
PF3D7_0201900	Plasmodium falciparum 3D7	erythrocyte membrane protein 3	EMP3	Biotin (K);Oxidation (M)	0	1	2	NKDLKSIGNMEQQNTGLK	_NKDLK(bi)SIGNM(ox)EQQNTGLK_;_NKDLK(bi)SIGNM(ox)EQQNTGLK_;_NKDLK(bi)SIGNM(ox)EQQNTGLK_;_NKDLK(bi)SIGNM(ox)EQQNTGLK_;_NKDLK(bi)SIGNM(ox)EQQNTGLK_;_NKDLK(bi)SIGNM(ox)EQQNTGLK_;_NKDLK(bi)SIGNMEQQNTGLK_;_NKDLK(bi)SIGNMEQQNTGLK_;_NKDLK(bi)SIGNMEQQNTGLK_;_NKDLK(bi)SIGNMEQQNTGLK_;_NKDLK(bi)SIGNMEQQNTGLK_;_NKDLK(bi)SIGNMEQQNTGLK_;_NK(bi)DLK(bi)SIGNM(ox)EQQNTGLK_;_NK(bi)DLK(bi)SIGNM(ox)EQQNTGLK_;_NK(bi)DL…	1317;1314	NA	0.208515	0.318105	0.14972	NA	NA	NA	20.7193	20.9632	20.8412	20.9897	21.1145	20.8687	NA	NA	NA	NA	NA	NA
PF3D7_0201900	Plasmodium falciparum 3D7	erythrocyte membrane protein 3	EMP3	2 Biotin (K)	0	2	2	NKDLKSIGNMEQQNTGLK	_NKDLK(bi)SIGNM(ox)EQQNTGLK_;_NKDLK(bi)SIGNM(ox)EQQNTGLK_;_NKDLK(bi)SIGNM(ox)EQQNTGLK_;_NKDLK(bi)SIGNM(ox)EQQNTGLK_;_NKDLK(bi)SIGNM(ox)EQQNTGLK_;_NKDLK(bi)SIGNM(ox)EQQNTGLK_;_NKDLK(bi)SIGNMEQQNTGLK_;_NKDLK(bi)SIGNMEQQNTGLK_;_NKDLK(bi)SIGNMEQQNTGLK_;_NKDLK(bi)SIGNMEQQNTGLK_;_NKDLK(bi)SIGNMEQQNTGLK_;_NKDLK(bi)SIGNMEQQNTGLK_;_NK(bi)DLK(bi)SIGNM(ox)EQQNTGLK_;_NK(bi)DLK(bi)SIGNM(ox)EQQNTGLK_;_NK(bi)DL…	1317;1314	NA	0.628786	0.0835841	-0.143799	NA	NA	NA	22.1451	22.4579	22.3867	21.6695	22.4513	22.4374	NA	NA	NA	NA	NA	NA
PF3D7_0201900	Plasmodium falciparum 3D7	erythrocyte membrane protein 3	EMP3	2 Biotin (K);Oxidation (M)	0	2	2	NKDLKSIGNMEQQNTGLK	_NKDLK(bi)SIGNM(ox)EQQNTGLK_;_NKDLK(bi)SIGNM(ox)EQQNTGLK_;_NKDLK(bi)SIGNM(ox)EQQNTGLK_;_NKDLK(bi)SIGNM(ox)EQQNTGLK_;_NKDLK(bi)SIGNM(ox)EQQNTGLK_;_NKDLK(bi)SIGNM(ox)EQQNTGLK_;_NKDLK(bi)SIGNMEQQNTGLK_;_NKDLK(bi)SIGNMEQQNTGLK_;_NKDLK(bi)SIGNMEQQNTGLK_;_NKDLK(bi)SIGNMEQQNTGLK_;_NKDLK(bi)SIGNMEQQNTGLK_;_NKDLK(bi)SIGNMEQQNTGLK_;_NK(bi)DLK(bi)SIGNM(ox)EQQNTGLK_;_NK(bi)DLK(bi)SIGNM(ox)EQQNTGLK_;_NK(bi)DL…	1317;1314	NA	NA	NA	NA	NA	NA	NA	NA	NA	NA	NA	NA	NA	NA	NA	NA	NA	NA	NA
PF3D7_0201900	Plasmodium falciparum 3D7	erythrocyte membrane protein 3	EMP3	Biotin (K)	0	1	2	NKDLKSIGNMEQQNTGLK	_NKDLK(bi)SIGNM(ox)EQQNTGLK_;_NKDLK(bi)SIGNM(ox)EQQNTGLK_;_NKDLK(bi)SIGNM(ox)EQQNTGLK_;_NKDLK(bi)SIGNM(ox)EQQNTGLK_;_NKDLK(bi)SIGNM(ox)EQQNTGLK_;_NKDLK(bi)SIGNM(ox)EQQNTGLK_;_NKDLK(bi)SIGNMEQQNTGLK_;_NKDLK(bi)SIGNMEQQNTGLK_;_NKDLK(bi)SIGNMEQQNTGLK_;_NKDLK(bi)SIGNMEQQNTGLK_;_NKDLK(bi)SIGNMEQQNTGLK_;_NKDLK(bi)SIGNMEQQNTGLK_;_NK(bi)DLK(bi)SIGNM(ox)EQQNTGLK_;_NK(bi)DLK(bi)SIGNM(ox)EQQNTGLK_;_NK(bi)DL…	1317;1314	NA	0.0109161	0.946719	-0.439456	NA	NA	NA	23.5711	23.3953	23.5355	23.1049	22.9026	23.176	NA	NA	NA	NA	NA	NA
PF3D7_0201900	Plasmodium falciparum 3D7	erythrocyte membrane protein 3	EMP3	Biotin (K)	0	1	2	NKELLNKDIR	_NKELLNK(bi)DIR_;_NKELLNK(bi)DIR_;_NKELLNK(bi)DIR_;_NKELLNK(bi)DIR_;_NKELLNK(bi)DIR_;_NKELLNK(bi)DIR_;_NKELLNK(bi)DIR_;_NKELLNK(bi)DIR_;_NKELLNK(bi)DIR_;_NKELLNK(bi)DIR_;_NKELLNK(bi)DIR_;_NKELLNK(bi)DIR_	1309	NA	0.0101752	0.959556	-0.602849	NA	NA	NA	22.6844	22.837	22.4675	21.944	22.2039	22.0324	NA	NA	NA	NA	NA	NA
PF3D7_0201900	Plasmodium falciparum 3D7	erythrocyte membrane protein 3	EMP3	Biotin (K);Oxidation (M)	0	1	3	NKELLNKDISNKDMK	_NKELLNK(bi)DISNKDM(ox)K_;_NKELLNK(bi)DISNKDM(ox)K_;_NKELLNK(bi)DISNKDM(ox)K_;_NKELLNK(bi)DISNKDM(ox)K_;_NKELLNK(bi)DISNKDM(ox)K_;_NKELLNK(bi)DISNKDM(ox)K_;_NKELLNK(bi)DISNKDM(ox)K_;_NKELLNK(bi)DISNKDM(ox)K_;_NKELLNK(bi)DISNKDM(ox)K_;_NKELLNK(bi)DISNKDM(ox)K_;_NKELLNK(bi)DISNKDM(ox)K_;_NKELLNK(bi)DISNKDM(ox)K_;_NKELLNK(bi)DISNKDM(ox)K_;_NKELLNK(bi)DISNKDM(ox)K_;_NKELLNK(bi)DISNKDM(ox)K_;_NKELLNK(…	1279	NA	0.445824	0.154915	0.235261	NA	NA	NA	20.9602	21.8536	21.4802	21.485	21.8387	21.6761	NA	NA	NA	NA	NA	NA
PF3D7_0201900	Plasmodium falciparum 3D7	erythrocyte membrane protein 3	EMP3	Biotin (K)	0	1	3	NKELLNKDISNKDMK	_NKELLNK(bi)DISNKDM(ox)K_;_NKELLNK(bi)DISNKDM(ox)K_;_NKELLNK(bi)DISNKDM(ox)K_;_NKELLNK(bi)DISNKDM(ox)K_;_NKELLNK(bi)DISNKDM(ox)K_;_NKELLNK(bi)DISNKDM(ox)K_;_NKELLNK(bi)DISNKDM(ox)K_;_NKELLNK(bi)DISNKDM(ox)K_;_NKELLNK(bi)DISNKDM(ox)K_;_NKELLNK(bi)DISNKDM(ox)K_;_NKELLNK(bi)DISNKDM(ox)K_;_NKELLNK(bi)DISNKDM(ox)K_;_NKELLNK(bi)DISNKDM(ox)K_;_NKELLNK(bi)DISNKDM(ox)K_;_NKELLNK(bi)DISNKDM(ox)K_;_NKELLNK(…	1279	NA	0.574414	0.104017	-0.0677656	NA	NA	NA	23.5154	23.8003	23.5235	23.6622	23.5067	23.4671	NA	NA	NA	NA	NA	NA
PF3D7_0201900	Plasmodium falciparum 3D7	erythrocyte membrane protein 3	EMP3	Biotin (K)	0	1	2	NKELLNKDLSNEDMK	_NK(bi)ELLNKDLSNEDMK_;_NK(bi)ELLNKDLSNEDMK_;_NK(bi)ELLNKDLSNEDMK_;_NK(bi)ELLNKDLSNEDMK_;_NK(bi)ELLNKDLSNEDMK_;_NK(bi)ELLNKDLSNEDMK_;_NKELLNK(bi)DLSNEDM(ox)K_;_NKELLNK(bi)DLSNEDM(ox)K_;_NKELLNK(bi)DLSNEDM(ox)K_	1289;1294	NA	0.0190146	0.803806	-0.861032	NA	NA	NA	22.1166	22.3556	21.9347	20.9592	21.2469	21.6178	NA	NA	NA	NA	NA	NA
PF3D7_0201900	Plasmodium falciparum 3D7	erythrocyte membrane protein 3	EMP3	Biotin (K);Oxidation (M)	0	1	2	NKELLNKDLSNEDMK	_NK(bi)ELLNKDLSNEDMK_;_NK(bi)ELLNKDLSNEDMK_;_NK(bi)ELLNKDLSNEDMK_;_NK(bi)ELLNKDLSNEDMK_;_NK(bi)ELLNKDLSNEDMK_;_NK(bi)ELLNKDLSNEDMK_;_NKELLNK(bi)DLSNEDM(ox)K_;_NKELLNK(bi)DLSNEDM(ox)K_;_NKELLNK(bi)DLSNEDM(ox)K_	1289;1294	NA	NA	NA	NA	NA	NA	NA	NA	NA	NA	NA	NA	NA	NA	NA	NA	NA	NA	NA
PF3D7_0201900	Plasmodium falciparum 3D7	erythrocyte membrane protein 3	EMP3	Biotin (K)	0	1	3	NKELQNKGSEGLKENAELK	_NKELQNK(bi)GSEGLKENAELK_;_NKELQNK(bi)GSEGLKENAELK_;_NKELQNK(bi)GSEGLKENAELK_;_NKELQNK(bi)GSEGLKENAELK_;_NKELQNK(bi)GSEGLKENAELK_;_NKELQNK(bi)GSEGLKENAELK_;_NKELQNK(bi)GSEGLKENAELK_;_NKELQNK(bi)GSEGLKENAELK_;_NKELQNK(bi)GSEGLKENAELK_;_NKELQNK(bi)GSEGLKENAELK_;_NKELQNK(bi)GSEGLKENAELK_;_NKELQNK(bi)GSEGLKENAELK_	1127;1146;1184;1203;1222	NA	0.0648635	0.582572	-0.570899	NA	NA	NA	22.2572	22.593	21.9481	21.4816	21.6801	21.9239	NA	NA	NA	NA	NA	NA
PF3D7_0201900	Plasmodium falciparum 3D7	erythrocyte membrane protein 3	EMP3	Biotin (K)	0	1	2	NKGSDGLKENAELK	_NK(bi)GSDGLKENAELK_;_NK(bi)GSDGLKENAELK_;_NK(bi)GSDGLKENAELK_;_NK(bi)GSDGLKENAELK_;_NK(bi)GSDGLKENAELK_	1070;1089;1108	NA	NA	NA	NA	NA	NA	NA	NA	NA	NA	NA	NA	NA	NA	NA	NA	NA	NA	NA
PF3D7_0201900	Plasmodium falciparum 3D7	erythrocyte membrane protein 3	EMP3	Biotin (K)	0	1	3	NKGSDGLKENAELKNK	_NK(bi)GSDGLKENAELKNK_;_NK(bi)GSDGLKENAELKNK_;_NKGSDGLKENAELK(bi)NK_;_NK(bi)GSDGLKENAELKNK_;_NK(bi)GSDGLKENAELKNK_;_NKGSDGLKENAELK(bi)NK_;_NKGSDGLKENAELK(bi)NK_;_NKGSDGLKENAELK(bi)NK_;_NK(bi)GSDGLKENAELKNK_;_NK(bi)GSDGLKENAELKNK_;_NK(bi)GSDGLKENAELKNK_;_NK(bi)GSDGLKENAELKNK_;_NKGSDGLKENAELK(bi)NK_;_NK(bi)GSDGLKENAELKNK_;_NK(bi)GSDGLKENAELKNK_;_NKGSDGLKENAELK(bi)NK_;_NKGSDGLKENAELK(bi)NK_;_NK(bi)G…	1070;1089;1108;1082;1101;1120	NA	0.864938	0.0307404	0.0153678	NA	NA	NA	22.0993	22.0745	21.9001	21.9468	22.1436	22.0296	NA	NA	NA	NA	NA	NA
PF3D7_0201900	Plasmodium falciparum 3D7	erythrocyte membrane protein 3	EMP3	Biotin (K)	0	1	2	NKGSEGLKENAELK	_NK(bi)GSEGLKENAELK_;_NK(bi)GSEGLKENAELK_;_NK(bi)GSEGLKENAELK_	1127;1146;1165;1184;1203;1222	NA	NA	NA	NA	NA	NA	NA	NA	NA	NA	NA	NA	NA	NA	NA	NA	NA	NA	NA
PF3D7_0201900	Plasmodium falciparum 3D7	erythrocyte membrane protein 3	EMP3	Biotin (K)	0	1	3	NKGSEGLKENAELKNK	_NK(bi)GSEGLKENAELKNK_	1127;1146;1165;1184;1203;1222	NA	NA	NA	NA	NA	NA	NA	NA	NA	NA	NA	NA	NA	NA	NA	NA	NA	NA	NA
PF3D7_0201900	Plasmodium falciparum 3D7	erythrocyte membrane protein 3	EMP3	Biotin (K)	0	1	2	NKGSEGLKENVYTNNDLK	_NK(bi)GSEGLKENVYTNNDLK_;_NK(bi)GSEGLKENVYTNNDLK_	1241	NA	NA	NA	NA	NA	NA	NA	NA	NA	NA	NA	NA	NA	NA	NA	NA	NA	NA	NA
PF3D7_0201900	Plasmodium falciparum 3D7	erythrocyte membrane protein 3	EMP3	Biotin (K)	0	1	3	NKGSEGLKENVYTNNDLKNNDIQNK	_NK(bi)GSEGLKENVYTNNDLKNNDIQNK_	1241	NA	NA	NA	NA	NA	NA	NA	NA	NA	NA	NA	NA	NA	NA	NA	NA	NA	NA	NA
PF3D7_0201900	Plasmodium falciparum 3D7	erythrocyte membrane protein 3	EMP3	Biotin (K)	0	1	1	NKPTDGLK	_NK(bi)PTDGLK_;_NK(bi)PTDGLK_;_NK(bi)PTDGLK_;_NK(bi)PTDGLK_;_NK(bi)PTDGLK_;_NK(bi)PTDGLK_	2408	NA	0.707646	0.0615814	-0.113092	NA	NA	NA	19.9774	20.595	20.1308	19.7355	20.4603	20.1681	NA	NA	NA	NA	NA	NA
PF3D7_0201900	Plasmodium falciparum 3D7	erythrocyte membrane protein 3	EMP3	Biotin (K)	0	1	2	NKSSFPDKFR	_NK(bi)SSFPDKFR_;_NK(bi)SSFPDKFR_;_NK(bi)SSFPDKFR_;_NK(bi)SSFPDKFR_;_NK(bi)SSFPDKFR_	436	NA	6.06327e-06	2.38314	-0.621847	NA	NA	NA	20.4412	20.4531	20.4472	19.8616	19.795	19.8194	NA	NA	NA	NA	NA	NA
PF3D7_0201900	Plasmodium falciparum 3D7	erythrocyte membrane protein 3	EMP3	Biotin (K)	0	1	1	NSASKGQQNTGLK	_NSASK(bi)GQQNTGLK_;_NSASK(bi)GQQNTGLK_;_NSASK(bi)GQQNTGLK_;_NSASK(bi)GQQNTGLK_;_NSASK(bi)GQQNTGLK_;_NSASK(bi)GQQNTGLK_	1634	NA	0.307046	0.234328	-0.275106	NA	NA	NA	19.9992	19.7847	19.9732	19.1939	19.8864	19.8516	NA	NA	NA	NA	NA	NA
PF3D7_0201900	Plasmodium falciparum 3D7	erythrocyte membrane protein 3	EMP3	Biotin (K)	0	1	1	NTASKGQQNTGLK	_NTASK(bi)GQQNTGLK_;_NTASK(bi)GQQNTGLK_;_NTASK(bi)GQQNTGLK_;_NTASK(bi)GQQNTGLK_;_NTASK(bi)GQQNTGLK_;_NTASK(bi)GQQNTGLK_;_NTASK(bi)GQQNTGLK_;_NTASK(bi)GQQNTGLK_;_NTASK(bi)GQQNTGLK_;_NTASK(bi)GQQNTGLK_;_NTASK(bi)GQQNTGLK_;_NTASK(bi)GQQNTGLK_;_NTASK(bi)GQQNTGLK_	1530;1595	NA	0.023852	0.770388	-0.559646	NA	NA	NA	21.6983	21.7105	21.9187	21.0038	21.1628	21.482	NA	NA	NA	NA	NA	NA
PF3D7_0201900	Plasmodium falciparum 3D7	erythrocyte membrane protein 3	EMP3	Biotin (K)	0	1	2	NTASKGQQNTGLKNAPNER	_NTASKGQQNTGLK(bi)NAPNER_	1538;1603	NA	NA	NA	NA	NA	NA	NA	NA	NA	NA	NA	NA	NA	NA	NA	NA	NA	NA	NA
PF3D7_0201900	Plasmodium falciparum 3D7	erythrocyte membrane protein 3	EMP3	Biotin (K)	0	1	1	NTPNEGQQNTGLKNTPSEGQQNTGLK	_NTPNEGQQNTGLK(bi)NTPSEGQQNTGLK_;_NTPNEGQQNTGLK(bi)NTPSEGQQNTGLK_;_NTPNEGQQNTGLK(bi)NTPSEGQQNTGLK_;_NTPNEGQQNTGLK(bi)NTPSEGQQNTGLK_;_NTPNEGQQNTGLK(bi)NTPSEGQQNTGLK_;_NTPNEGQQNTGLK(bi)NTPSEGQQNTGLK_;_NTPNEGQQNTGLK(bi)NTPSEGQQNTGLK_	1772;1850;1928;2006;2045;2123;2188;2318;2344	NA	0.0146445	0.868371	-0.731149	NA	NA	NA	23.1605	23.0036	23.1861	22.085	22.4052	22.6666	NA	NA	NA	NA	NA	NA
PF3D7_0201900	Plasmodium falciparum 3D7	erythrocyte membrane protein 3	EMP3	Biotin (K)	0	1	2	NTPNEGQQNTGLKNTPSEGQQNTGLKNTPSEGQQNTGLK	_NTPNEGQQNTGLK(bi)NTPSEGQQNTGLKNTPSEGQQNTGLK_	1772;1850;1928;2045;2123	NA	NA	NA	NA	NA	NA	NA	NA	NA	NA	NA	NA	NA	NA	NA	NA	NA	NA	NA
PF3D7_0201900	Plasmodium falciparum 3D7	erythrocyte membrane protein 3	EMP3	Biotin (K)	0	1	1	NTPSEGQQNNDLKNAPNER	_NTPSEGQQNNDLK(bi)NAPNER_;_NTPSEGQQNNDLK(bi)NAPNER_;_NTPSEGQQNNDLK(bi)NAPNER_	1655	NA	NA	NA	NA	NA	NA	NA	NA	NA	NA	NA	NA	NA	NA	NA	NA	NA	NA	NA
PF3D7_0201900	Plasmodium falciparum 3D7	erythrocyte membrane protein 3	EMP3	Biotin (K)	0	1	1	NTPSEGQQNNDLKNTPNER	_NTPSEGQQNNDLK(bi)NTPNER_;_NTPSEGQQNNDLK(bi)NTPNER_;_NTPSEGQQNNDLK(bi)NTPNER_	1512	NA	NA	NA	NA	NA	NA	NA	NA	NA	NA	NA	NA	NA	NA	NA	NA	NA	NA	NA
PF3D7_0201900	Plasmodium falciparum 3D7	erythrocyte membrane protein 3	EMP3	Biotin (K)	0	1	1	NTPSEGQQNTGLKNAANK	_NTPSEGQQNTGLK(bi)NAANK_;_NTPSEGQQNTGLK(bi)NAANK_	1889;2019;2084;2201;2240;2279	NA	NA	NA	NA	NA	NA	NA	NA	NA	NA	NA	NA	NA	NA	NA	NA	NA	NA	NA
PF3D7_0201900	Plasmodium falciparum 3D7	erythrocyte membrane protein 3	EMP3	Biotin (K)	0	1	2	NTPSEGQQNTGLKNAANKGQQNTGLK	_NTPSEGQQNTGLK(bi)NAANKGQQNTGLK_;_NTPSEGQQNTGLKNAANK(bi)GQQNTGLK_;_NTPSEGQQNTGLK(bi)NAANKGQQNTGLK_;_NTPSEGQQNTGLKNAANK(bi)GQQNTGLK_;_NTPSEGQQNTGLK(bi)NAANKGQQNTGLK_;_NTPSEGQQNTGLKNAANK(bi)GQQNTGLK_;_NTPSEGQQNTGLK(bi)NAANKGQQNTGLK_;_NTPSEGQQNTGLK(bi)NAANKGQQNTGLK_;_NTPSEGQQNTGLKNAANK(bi)GQQNTGLK_;_NTPSEGQQNTGLK(bi)NAANKGQQNTGLK_;_NTPSEGQQNTGLKNAANK(bi)GQQNTGLK_	1889;2019;2084;2201;2240;2279;1894;2024;2089;2206;2245;2284	NA	0.247439	0.28528	-0.513832	NA	NA	NA	23.1238	23.179	23.2746	22.0393	22.6515	23.3451	NA	NA	NA	NA	NA	NA
PF3D7_0201900	Plasmodium falciparum 3D7	erythrocyte membrane protein 3	EMP3	Biotin (K)	0	1	1	NTPSEGQQNTGLKNSASK	_NTPSEGQQNTGLK(bi)NSASK_;_NTPSEGQQNTGLK(bi)NSASK_;_NTPSEGQQNTGLK(bi)NSASK_;_NTPSEGQQNTGLK(bi)NSASK_	1629	NA	NA	NA	NA	NA	NA	NA	NA	NA	NA	NA	NA	NA	NA	NA	NA	NA	NA	NA
PF3D7_0201900	Plasmodium falciparum 3D7	erythrocyte membrane protein 3	EMP3	Biotin (K)	0	1	1	NTPSEGQQNTGLKNTPIEGQQNTGLK	_NTPSEGQQNTGLK(bi)NTPIEGQQNTGLK_;_NTPSEGQQNTGLK(bi)NTPIEGQQNTGLK_;_NTPSEGQQNTGLK(bi)NTPIEGQQNTGLK_;_NTPSEGQQNTGLK(bi)NTPIEGQQNTGLK_;_NTPSEGQQNTGLK(bi)NTPIEGQQNTGLK_;_NTPSEGQQNTGLK(bi)NTPIEGQQNTGLK_;_NTPSEGQQNTGLK(bi)NTPIEGQQNTGLK_	1408	NA	0.0443285	0.658059	-0.569872	NA	NA	NA	21.916	21.6131	22.2798	21.4109	21.4017	21.2867	NA	NA	NA	NA	NA	NA
PF3D7_0201900	Plasmodium falciparum 3D7	erythrocyte membrane protein 3	EMP3	Biotin (K)	0	1	1	NTPSEGQQNTGLKNTPNER	_NTPSEGQQNTGLK(bi)NTPNER_;_NTPSEGQQNTGLK(bi)NTPNER_;_NTPSEGQQNTGLK(bi)NTPNER_;_NTPSEGQQNTGLK(bi)NTPNER_;_NTPSEGQQNTGLK(bi)NTPNER_;_NTPSEGQQNTGLK(bi)NTPNER_;_NTPSEGQQNTGLK(bi)NTPNER_;_NTPSEGQQNTGLK(bi)NTPNER_;_NTPSEGQQNTGLK(bi)NTPNER_;_NTPSEGQQNTGLK(bi)NTPNER_;_NTPSEGQQNTGLK(bi)NTPNER_;_NTPSEGQQNTGLK(bi)NTPNER_	1382;1434;1577;1733;1811;1954	NA	0.158308	0.386971	-0.360159	NA	NA	NA	22.5873	22.7912	22.8298	22.0397	22.3768	22.7112	NA	NA	NA	NA	NA	NA
PF3D7_0201900	Plasmodium falciparum 3D7	erythrocyte membrane protein 3	EMP3	Biotin (K)	0	1	1	NTPSEGQQNTGLKNTPSEGQPNTGLK	_NTPSEGQQNTGLK(bi)NTPSEGQPNTGLK_;_NTPSEGQQNTGLK(bi)NTPSEGQPNTGLK_	1980;2162	NA	NA	NA	NA	NA	NA	NA	NA	NA	NA	NA	NA	NA	NA	NA	NA	NA	NA	NA
PF3D7_0201900	Plasmodium falciparum 3D7	erythrocyte membrane protein 3	EMP3	Biotin (K)	0	1	1	NTPSEGQQNTGLKNTPSEGQQNTGLK	_NTPSEGQQNTGLK(bi)NTPSEGQQNTGLK_;_NTPSEGQQNTGLK(bi)NTPSEGQQNTGLK_;_NTPSEGQQNTGLK(bi)NTPSEGQQNTGLK_;_NTPSEGQQNTGLK(bi)NTPSEGQQNTGLK_;_NTPSEGQQNTGLK(bi)NTPSEGQQNTGLK_;_NTPSEGQQNTGLK(bi)NTPSEGQQNTGLK_	1369;1564;1681;1785;1863;1941;2058;2136;2227;2266	NA	0.11233	0.471379	-0.510056	NA	NA	NA	23.582	23.5231	23.6499	22.5948	23.2024	23.4275	NA	NA	NA	NA	NA	NA
PF3D7_0201900	Plasmodium falciparum 3D7	erythrocyte membrane protein 3	EMP3	Biotin (K)	0	1	2	NTPSEGQQNTGLKNTPSEGQQNTGLKNTPNER	_NTPSEGQQNTGLK(bi)NTPSEGQQNTGLKNTPNER_	1369;1564;1798;1941	NA	NA	NA	NA	NA	NA	NA	NA	NA	NA	NA	NA	NA	NA	NA	NA	NA	NA	NA
PF3D7_0201900	Plasmodium falciparum 3D7	erythrocyte membrane protein 3	EMP3	Biotin (K)	0	1	1	NTPSKGQQNTGLK	_NTPSK(bi)GQQNTGLK_;_NTPSK(bi)GQQNTGLK_;_NTPSK(bi)GQQNTGLK_;_NTPSK(bi)GQQNTGLK_;_NTPSK(bi)GQQNTGLK_;_NTPSK(bi)GQQNTGLK_	1335;1465	NA	0.186669	0.345648	-0.351486	NA	NA	NA	22.3221	22.4416	22.5913	21.7045	22.1947	22.4013	NA	NA	NA	NA	NA	NA
PF3D7_0201900	Plasmodium falciparum 3D7	erythrocyte membrane protein 3	EMP3	Biotin (K)	0	1	2	NTPSKGQQNTGLKNTPNER	_NTPSKGQQNTGLK(bi)NTPNER_;_NTPSK(bi)GQQNTGLKNTPNER_;_NTPSKGQQNTGLK(bi)NTPNER_;_NTPSK(bi)GQQNTGLKNTPNER_;_NTPSKGQQNTGLK(bi)NTPNER_;_NTPSK(bi)GQQNTGLKNTPNER_;_NTPSKGQQNTGLK(bi)NTPNER_;_NTPSK(bi)GQQNTGLKNTPNER_;_NTPSKGQQNTGLK(bi)NTPNER_;_NTPSK(bi)GQQNTGLKNTPNER_;_NTPSKGQQNTGLK(bi)NTPNER_;_NTPSK(bi)GQQNTGLKNTPNER_	1343;1473;1335;1465	NA	0.777712	0.0447459	0.0515811	NA	NA	NA	21.5278	21.577	21.9381	21.5675	21.945	21.6851	NA	NA	NA	NA	NA	NA
PF3D7_0201900	Plasmodium falciparum 3D7	erythrocyte membrane protein 3	EMP3	Biotin (K)	0	1	1	QQNTGLKNAANK	_QQNTGLK(bi)NAANK_;_QQNTGLK(bi)NAANK_;_QQNTGLK(bi)NAANK_;_QQNTGLK(bi)NAANK_;_QQNTGLK(bi)NAANK_;_QQNTGLK(bi)NAANK_;_QQNTGLK(bi)NAANK_;_QQNTGLK(bi)NAANK_	1447;1746;1824;1889;2019;2084;2201;2240;2279	NA	0.263875	0.269672	-0.721496	NA	NA	NA	19.9953	20.0159	19.9664	19.5828	18.1919	20.0385	NA	NA	NA	NA	NA	NA
PF3D7_0201900	Plasmodium falciparum 3D7	erythrocyte membrane protein 3	EMP3	Biotin (K)	0	1	2	QQNTGLKNAANKGQQNTGLK	_QQNTGLK(bi)NAANKGQQNTGLK_;_QQNTGLK(bi)NAANKGQQNTGLK_;_QQNTGLK(bi)NAANKGQQNTGLK_;_QQNTGLK(bi)NAANKGQQNTGLK_;_QQNTGLKNAANK(bi)GQQNTGLK_;_QQNTGLKNAANK(bi)GQQNTGLK_;_QQNTGLK(bi)NAANKGQQNTGLK_	1447;1746;1824;1889;2019;2084;2201;2240;2279;1452;1751;1829;1894;2024;2089;2206;2245;2284	NA	0.353959	0.197054	-0.111319	NA	NA	NA	22.2459	22.5027	22.2988	22.2519	22.3546	22.1069	NA	NA	NA	NA	NA	NA
PF3D7_0201900	Plasmodium falciparum 3D7	erythrocyte membrane protein 3	EMP3	Biotin (K)	0	1	1	QQNTGLKNTASK	_QQNTGLK(bi)NTASK_;_QQNTGLK(bi)NTASK_;_QQNTGLK(bi)NTASK_;_QQNTGLK(bi)NTASK_;_QQNTGLK(bi)NTASK_;_QQNTGLK(bi)NTASK_;_QQNTGLK(bi)NTASK_;_QQNTGLK(bi)NTASK_;_QQNTGLK(bi)NTASK_	1525;1590	NA	0.0449723	0.6553	-0.812879	NA	NA	NA	21.8896	21.4387	22.318	20.9851	20.9107	21.3118	NA	NA	NA	NA	NA	NA
PF3D7_0201900	Plasmodium falciparum 3D7	erythrocyte membrane protein 3	EMP3	Biotin (K)	0	1	2	QQNTGLKNTASKGQQNTGLK	_QQNTGLKNTASK(bi)GQQNTGLK_;_QQNTGLKNTASK(bi)GQQNTGLK_;_QQNTGLKNTASK(bi)GQQNTGLK_;_QQNTGLKNTASK(bi)GQQNTGLK_;_QQNTGLKNTASK(bi)GQQNTGLK_;_QQNTGLKNTASK(bi)GQQNTGLK_	1530;1595	NA	0.328224	0.219671	0.181054	NA	NA	NA	21.8223	21.3537	21.8369	21.8499	21.9156	21.7906	NA	NA	NA	NA	NA	NA
PF3D7_0201900	Plasmodium falciparum 3D7	erythrocyte membrane protein 3	EMP3	Biotin (K)	0	1	1	QQNTGLKNTPNEGQQNTGLK	_QQNTGLK(bi)NTPNEGQQNTGLK_;_QQNTGLK(bi)NTPNEGQQNTGLK_;_QQNTGLK(bi)NTPNEGQQNTGLK_;_QQNTGLK(bi)NTPNEGQQNTGLK_;_QQNTGLK(bi)NTPNEGQQNTGLK_	1759;1837;1915;2032;2110;2331	NA	0.0238852	0.770388	-0.815241	NA	NA	NA	21.4217	20.8024	20.735	20.1711	20.2949	20.0474	NA	NA	NA	NA	NA	NA
PF3D7_0201900	Plasmodium falciparum 3D7	erythrocyte membrane protein 3	EMP3	Biotin (K)	0	1	1	QQNTGLKNTPNER	_QQNTGLK(bi)NTPNER_;_QQNTGLK(bi)NTPNER_;_QQNTGLK(bi)NTPNER_;_QQNTGLK(bi)NTPNER_;_QQNTGLK(bi)NTPNER_;_QQNTGLK(bi)NTPNER_	1343;1382;1434;1473;1486;1577;1707;1733;1811;1954;2097	NA	0.084693	0.523817	0.699541	NA	NA	NA	19.8865	20.4064	20.1465	21.3783	20.6256	20.5341	NA	NA	NA	NA	NA	NA
PF3D7_0201900	Plasmodium falciparum 3D7	erythrocyte membrane protein 3	EMP3	Biotin (K)	0	1	1	QQNTGLKNTPSEGQQNNDLK	_QQNTGLK(bi)NTPSEGQQNNDLK_	1499;1642	NA	NA	NA	NA	NA	NA	NA	NA	NA	NA	NA	NA	NA	NA	NA	NA	NA	NA	NA
PF3D7_0201900	Plasmodium falciparum 3D7	erythrocyte membrane protein 3	EMP3	Biotin (K)	0	1	1	QQNTGLKNTPSEGQQNTGLK	_QQNTGLK(bi)NTPSEGQQNTGLK_;_QQNTGLK(bi)NTPSEGQQNTGLK_;_QQNTGLK(bi)NTPSEGQQNTGLK_;_QQNTGLK(bi)NTPSEGQQNTGLK_;_QQNTGLK(bi)NTPSEGQQNTGLK_;_QQNTGLK(bi)NTPSEGQQNTGLK_;_QQNTGLK(bi)NTPSEGQQNTGLK_;_QQNTGLK(bi)NTPSEGQQNTGLK_	1356;1395;1421;1551;1616;1668;1720;1772;1798;1850;1876;1928;1967;2006;2045;2071;2123;2149;2188;2214;2253;2318;2344	NA	0.00395862	1.17541	-0.486246	NA	NA	NA	23.6142	23.4086	23.5698	22.9437	23.0712	23.119	NA	NA	NA	NA	NA	NA
PF3D7_0201900	Plasmodium falciparum 3D7	erythrocyte membrane protein 3	EMP3	Biotin (K);Oxidation (M)	0	1	2	RPMMVKMQR	_RPM(ox)MVK(bi)MQR_;_RPMMVK(bi)M(ox)QR_;_RPM(ox)MVK(bi)MQR_;_RPM(ox)MVK(bi)MQR_;_RPMM(ox)VK(bi)MQR_;_RPM(ox)MVK(bi)MQR_;_RPM(ox)MVK(bi)MQR_;_RPM(ox)MVK(bi)MQR_;_RPMMVK(bi)M(ox)QR_;_RPMMVK(bi)M(ox)QR_;_RPMMVK(bi)M(ox)QR_;_RPMMVK(bi)M(ox)QR_;_RPM(ox)MVK(bi)MQR_;_RPMMVK(bi)M(ox)QR_;_RPMMVK(bi)MQR_;_RPMMVK(bi)MQR_;_RPMMVK(bi)MQR_;_RPMMVK(bi)MQR_;_RPMMVK(bi)MQR_;_RPMMVK(bi)MQR_;_RPMM(ox)VK(bi)M(ox)QR_…	284	NA	0.0357847	0.688744	0.337718	NA	NA	NA	21.6092	21.7819	21.7721	21.9507	22.2438	21.9818	NA	NA	NA	NA	NA	NA
PF3D7_0201900	Plasmodium falciparum 3D7	erythrocyte membrane protein 3	EMP3	Biotin (K)	0	1	2	RPMMVKMQR	_RPM(ox)MVK(bi)MQR_;_RPMMVK(bi)M(ox)QR_;_RPM(ox)MVK(bi)MQR_;_RPM(ox)MVK(bi)MQR_;_RPMM(ox)VK(bi)MQR_;_RPM(ox)MVK(bi)MQR_;_RPM(ox)MVK(bi)MQR_;_RPM(ox)MVK(bi)MQR_;_RPMMVK(bi)M(ox)QR_;_RPMMVK(bi)M(ox)QR_;_RPMMVK(bi)M(ox)QR_;_RPMMVK(bi)M(ox)QR_;_RPM(ox)MVK(bi)MQR_;_RPMMVK(bi)M(ox)QR_;_RPMMVK(bi)MQR_;_RPMMVK(bi)MQR_;_RPMMVK(bi)MQR_;_RPMMVK(bi)MQR_;_RPMMVK(bi)MQR_;_RPMMVK(bi)MQR_;_RPMM(ox)VK(bi)M(ox)QR_…	284	NA	0.0262515	0.757558	-0.250969	NA	NA	NA	22.8777	23.0087	22.7787	22.5877	22.6904	22.6341	NA	NA	NA	NA	NA	NA
PF3D7_0201900	Plasmodium falciparum 3D7	erythrocyte membrane protein 3	EMP3	2 Oxidation (M);Biotin (K)	0	1	2	RPMMVKMQR	_RPM(ox)MVK(bi)MQR_;_RPMMVK(bi)M(ox)QR_;_RPM(ox)MVK(bi)MQR_;_RPM(ox)MVK(bi)MQR_;_RPMM(ox)VK(bi)MQR_;_RPM(ox)MVK(bi)MQR_;_RPM(ox)MVK(bi)MQR_;_RPM(ox)MVK(bi)MQR_;_RPMMVK(bi)M(ox)QR_;_RPMMVK(bi)M(ox)QR_;_RPMMVK(bi)M(ox)QR_;_RPMMVK(bi)M(ox)QR_;_RPM(ox)MVK(bi)MQR_;_RPMMVK(bi)M(ox)QR_;_RPMMVK(bi)MQR_;_RPMMVK(bi)MQR_;_RPMMVK(bi)MQR_;_RPMMVK(bi)MQR_;_RPMMVK(bi)MQR_;_RPMMVK(bi)MQR_;_RPMM(ox)VK(bi)M(ox)QR_…	284	NA	0.551044	0.112089	-0.160129	NA	NA	NA	20.4852	20.1485	20.8219	20.1662	20.1815	20.6274	NA	NA	NA	NA	NA	NA
PF3D7_0201900	Plasmodium falciparum 3D7	erythrocyte membrane protein 3	EMP3	Biotin (K)	0	1	1	SAGHPFKYQPTK	_SAGHPFK(bi)YQPTK_;_SAGHPFK(bi)YQPTK_;_SAGHPFK(bi)YQPTK_;_SAGHPFK(bi)YQPTK_	562	NA	NA	NA	NA	NA	NA	NA	NA	NA	NA	NA	NA	NA	NA	NA	NA	NA	NA	NA
PF3D7_0201900	Plasmodium falciparum 3D7	erythrocyte membrane protein 3	EMP3	Biotin (K)	0	1	2	SAGHPFKYQPTKGLK	_SAGHPFKYQPTK(bi)GLK_;_SAGHPFKYQPTKGLK(bi)_;_SAGHPFKYQPTKGLK(bi)_	567;570	NA	NA	NA	NA	NA	NA	NA	NA	NA	NA	NA	NA	NA	NA	NA	NA	NA	NA	NA
PF3D7_0201900	Plasmodium falciparum 3D7	erythrocyte membrane protein 3	EMP3	Biotin (K)	0	1	2	SIGNMEQQNTGLKNTPSKGQQNTGLK	_SIGNMEQQNTGLKNTPSK(bi)GQQNTGLK_	1335	NA	NA	NA	NA	NA	NA	NA	NA	NA	NA	NA	NA	NA	NA	NA	NA	NA	NA	NA
PF3D7_0201900	Plasmodium falciparum 3D7	erythrocyte membrane protein 3	EMP3	Biotin (K)	0	1	2	SSFPDKFRAPDK	_SSFPDK(bi)FRAPDK_;_SSFPDK(bi)FRAPDK_	442	NA	NA	NA	NA	NA	NA	NA	NA	NA	NA	NA	NA	NA	NA	NA	NA	NA	NA	NA
PF3D7_0201900	Plasmodium falciparum 3D7	erythrocyte membrane protein 3	EMP3	Biotin (K)	0	1	2	YQPTKGLKEYEESHVAK	_YQPTK(bi)GLKEYEESHVAK_;_YQPTKGLK(bi)EYEESHVAK_;_YQPTK(bi)GLKEYEESHVAK_;_YQPTK(bi)GLKEYEESHVAK_;_YQPTK(bi)GLKEYEESHVAK_;_YQPTK(bi)GLKEYEESHVAK_;_YQPTK(bi)GLKEYEESHVAK_;_YQPTK(bi)GLKEYEESHVAK_;_YQPTK(bi)GLKEYEESHVAK_	567;570	NA	0.128909	0.437233	-0.708196	NA	NA	NA	22.2075	22.2666	21.4537	20.8396	21.7464	21.2172	NA	NA	NA	NA	NA	NA
PF3D7_0201900	Plasmodium falciparum 3D7	erythrocyte membrane protein 3	EMP3	Biotin (K)	0	1	2	YYLKEDGEGDLKDVEEK	_YYLK(bi)EDGEGDLKDVEEK_;_YYLK(bi)EDGEGDLKDVEEK_;_YYLK(bi)EDGEGDLKDVEEK_;_YYLK(bi)EDGEGDLKDVEEK_;_YYLK(bi)EDGEGDLKDVEEK_;_YYLK(bi)EDGEGDLKDVEEK_;_YYLK(bi)EDGEGDLKDVEEK_	356	NA	0.466024	0.14608	-0.390646	NA	NA	NA	21.4507	22.0688	20.8327	20.4525	21.145	21.5827	NA	NA	NA	NA	NA	NA
PF3D7_0201900	Plasmodium falciparum 3D7	erythrocyte membrane protein 3	EMP3	Biotin (K)	0	1	3	YYLKEDGEGDLKDVEEKLEETGYGFR	_YYLK(bi)EDGEGDLKDVEEKLEETGYGFR_;_YYLK(bi)EDGEGDLKDVEEKLEETGYGFR_;_YYLK(bi)EDGEGDLKDVEEKLEETGYGFR_;_YYLK(bi)EDGEGDLKDVEEKLEETGYGFR_;_YYLK(bi)EDGEGDLKDVEEKLEETGYGFR_;_YYLK(bi)EDGEGDLKDVEEKLEETGYGFR_;_YYLK(bi)EDGEGDLKDVEEKLEETGYGFR_;_YYLK(bi)EDGEGDLKDVEEKLEETGYGFR_	356	NA	0.581603	0.103343	0.184087	NA	NA	NA	22.8137	23.3409	22.2866	22.9568	23.0849	22.9518	NA	NA	NA	NA	NA	NA
PF3D7_0202000	Plasmodium falciparum 3D7	knob-associated histidine-rich protein	KAHRP	Biotin (K)	0	1	3	AHEKKENETKNTAGENK	_AHEKKENETK(bi)NTAGENK_;_AHEKKENETK(bi)NTAGENK_;_AHEKKENETK(bi)NTAGENK_	483	NA	NA	NA	NA	NA	NA	NA	NA	NA	NA	NA	NA	NA	NA	NA	NA	NA	NA	NA
PF3D7_0202000	Plasmodium falciparum 3D7	knob-associated histidine-rich protein	KAHRP	Biotin (K)	0	1	1	AYEEKYESK	_AYEEK(bi)YESK_;_AYEEK(bi)YESK_;_AYEEK(bi)YESK_;_AYEEK(bi)YESK_;_AYEEK(bi)YESK_;_AYEEK(bi)YESK_;_AYEEK(bi)YESK_;_AYEEK(bi)YESK_;_AYEEK(bi)YESK_;_AYEEK(bi)YESK_;_AYEEK(bi)YESK_;_AYEEK(bi)YESK_;_AYEEK(bi)YESK_;_AYEEK(bi)YESK_;_AYEEK(bi)YESK_;_AYEEK(bi)YESK_;_AYEEK(bi)YESK_;_AYEEK(bi)YESK_;_AYEEK(bi)YESK_;_AYEEK(bi)YESK_;_AYEEK(bi)YESK_;_AYEEK(bi)YESK_;_AYEEK(bi)YESK_	157	NA	0.127637	0.43942	0.268688	0.522884	0.0820632	0.0716986	23.115	23.5231	23.49	23.5547	23.6516	23.7279	24.4442	24.6005	24.504	24.6529	24.4067	24.7043
PF3D7_0202000	Plasmodium falciparum 3D7	knob-associated histidine-rich protein	KAHRP	2 Biotin (K)	0	2	2	AYEEKYESKHYK	_AYEEKYESK(bi)HYK_;_AYEEKYESK(bi)HYK_;_AYEEKYESK(bi)HYK_;_AYEEKYESK(bi)HYK_;_AYEEKYESK(bi)HYK_;_AYEEKYESK(bi)HYK_;_AYEEKYESK(bi)HYK_;_AYEEKYESK(bi)HYK_;_AYEEKYESK(bi)HYK_;_AYEEKYESK(bi)HYK_;_AYEEKYESK(bi)HYK_;_AYEEKYESK(bi)HYK_;_AYEEKYESKHYK(bi)_;_AYEEKYESK(bi)HYK_;_AYEEKYESK(bi)HYK_;_AYEEKYESK(bi)HYK_;_AYEEKYESK(bi)HYK_;_AYEEKYESK(bi)HYK_;_AYEEKYESK(bi)HYK_;_AYEEKYESK(bi)HYK_;_AYEEKYESK(bi)HYK_;…	161;164;157	NA	0.021075	0.785998	0.269391	NA	NA	NA	24.0581	24.0413	24.1903	24.3472	24.4707	24.28	NA	NA	NA	NA	NA	NA
PF3D7_0202000	Plasmodium falciparum 3D7	knob-associated histidine-rich protein	KAHRP	Biotin (K)	0	1	2	AYEEKYESKHYK	_AYEEKYESK(bi)HYK_;_AYEEKYESK(bi)HYK_;_AYEEKYESK(bi)HYK_;_AYEEKYESK(bi)HYK_;_AYEEKYESK(bi)HYK_;_AYEEKYESK(bi)HYK_;_AYEEKYESK(bi)HYK_;_AYEEKYESK(bi)HYK_;_AYEEKYESK(bi)HYK_;_AYEEKYESK(bi)HYK_;_AYEEKYESK(bi)HYK_;_AYEEKYESK(bi)HYK_;_AYEEKYESKHYK(bi)_;_AYEEKYESK(bi)HYK_;_AYEEKYESK(bi)HYK_;_AYEEKYESK(bi)HYK_;_AYEEKYESK(bi)HYK_;_AYEEKYESK(bi)HYK_;_AYEEKYESK(bi)HYK_;_AYEEKYESK(bi)HYK_;_AYEEKYESK(bi)HYK_;…	161;164;157	NA	0.105208	0.49141	0.159171	0.599076	0.0664682	0.166789	28.0035	28.1019	27.9131	28.1812	28.2487	28.066	28.3914	28.5602	28.224	28.4779	28.1262	29.0719
PF3D7_0202000	Plasmodium falciparum 3D7	knob-associated histidine-rich protein	KAHRP	2 Biotin (K)	0	2	3	AYEEKYESKHYKLK	_AYEEKYESKHYKLK(bi)_;_AYEEKYESKHYKLK(bi)_;_AYEEKYESKHYKLK(bi)_;_AYEEKYESKHYKLK(bi)_;_AYEEKYESKHYK(bi)LK_;_AYEEKYESKHYK(bi)LK_;_AYEEKYESKHYK(bi)LK_;_AYEEKYESKHYKLK(bi)_;_AYEEKYESKHYK(bi)LK_;_AYEEKYESKHYKLK(bi)_;_AYEEKYESKHYKLK(bi)_;_AYEEKYESKHYKLK(bi)_;_AYEEKYESKHYKLK(bi)_;_AYEEKYESKHYK(bi)LK_;_AYEEKYESKHYKLK(bi)_;_AYEEKYESKHYK(bi)LK_;_AYEEKYESKHYKLK(bi)_;_AYEEKYESKHYKLK(bi)_;_AYEEKYESK(bi)HYK(bi)…	166;164;161;157	NA	0.288118	0.251173	0.126604	0.519	0.0826007	-0.121576	24.2132	24.1243	23.9045	24.1223	24.2877	24.2118	20.691	20.6936	21.1357	20.8714	20.7185	20.5656
PF3D7_0202000	Plasmodium falciparum 3D7	knob-associated histidine-rich protein	KAHRP	Biotin (K)	0	1	3	AYEEKYESKHYKLK	_AYEEKYESKHYKLK(bi)_;_AYEEKYESKHYKLK(bi)_;_AYEEKYESKHYKLK(bi)_;_AYEEKYESKHYKLK(bi)_;_AYEEKYESKHYK(bi)LK_;_AYEEKYESKHYK(bi)LK_;_AYEEKYESKHYK(bi)LK_;_AYEEKYESKHYKLK(bi)_;_AYEEKYESKHYK(bi)LK_;_AYEEKYESKHYKLK(bi)_;_AYEEKYESKHYKLK(bi)_;_AYEEKYESKHYKLK(bi)_;_AYEEKYESKHYKLK(bi)_;_AYEEKYESKHYK(bi)LK_;_AYEEKYESKHYKLK(bi)_;_AYEEKYESKHYK(bi)LK_;_AYEEKYESKHYKLK(bi)_;_AYEEKYESKHYKLK(bi)_;_AYEEKYESK(bi)HYK(bi)…	166;164;161;157	NA	0.0712873	0.567015	0.411348	0.0447547	0.48837	-0.835443	22.0626	21.6649	22.1994	22.2821	22.4429	22.4359	20.9322	21.4161	20.4482	19.9656	20.0967	20.2279
PF3D7_0202000	Plasmodium falciparum 3D7	knob-associated histidine-rich protein	KAHRP	3 Biotin (K)	0	3	3	AYEEKYESKHYKLK	_AYEEKYESKHYKLK(bi)_;_AYEEKYESKHYKLK(bi)_;_AYEEKYESKHYKLK(bi)_;_AYEEKYESKHYKLK(bi)_;_AYEEKYESKHYK(bi)LK_;_AYEEKYESKHYK(bi)LK_;_AYEEKYESKHYK(bi)LK_;_AYEEKYESKHYKLK(bi)_;_AYEEKYESKHYK(bi)LK_;_AYEEKYESKHYKLK(bi)_;_AYEEKYESKHYKLK(bi)_;_AYEEKYESKHYKLK(bi)_;_AYEEKYESKHYKLK(bi)_;_AYEEKYESKHYK(bi)LK_;_AYEEKYESKHYKLK(bi)_;_AYEEKYESKHYK(bi)LK_;_AYEEKYESKHYKLK(bi)_;_AYEEKYESKHYKLK(bi)_;_AYEEKYESK(bi)HYK(bi)…	166;164;161;157	NA	NA	NA	NA	NA	NA	NA	NA	NA	NA	NA	NA	NA	NA	NA	NA	NA	NA	NA
PF3D7_0202000	Plasmodium falciparum 3D7	knob-associated histidine-rich protein	KAHRP	Biotin (K)	0	1	1	DCDEKYEAANYAFSEECPYTVNDYSQENGPNIFALR	_DCDEK(bi)YEAANYAFSEECPYTVNDYSQENGPNIFALR_;_DCDEK(bi)YEAANYAFSEECPYTVNDYSQENGPNIFALR_;_DCDEK(bi)YEAANYAFSEECPYTVNDYSQENGPNIFALR_;_DCDEK(bi)YEAANYAFSEECPYTVNDYSQENGPNIFALR_;_DCDEK(bi)YEAANYAFSEECPYTVNDYSQENGPNIFALR_;_DCDEK(bi)YEAANYAFSEECPYTVNDYSQENGPNIFALR_;_DCDEK(bi)YEAANYAFSEECPYTVNDYSQENGPNIFALR_;_DCDEK(bi)YEAANYAFSEECPYTVNDYSQENGPNIFALR_;_DCDEK(bi)YEAANYAFSEECPYTVNDYSQENGPNIFALR_;_DCDEK(bi)YE…	179	NA	0.000391751	1.70762	0.559884	0.198595	0.193025	0.602872	22.9861	22.9468	22.9074	23.5067	23.5858	23.4275	24.866	23.8804	23.6695	24.6161	25.0054	24.6029
PF3D7_0202000	Plasmodium falciparum 3D7	knob-associated histidine-rich protein	KAHRP	Biotin (K);Oxidation (M)	0	1	1	DETADKNAANNGEQVMSR	_DETADK(bi)NAANNGEQVMSR_;_DETADK(bi)NAANNGEQVMSR_;_DETADK(bi)NAANNGEQVMSR_;_DETADK(bi)NAANNGEQVMSR_;_DETADK(bi)NAANNGEQVMSR_;_DETADK(bi)NAANNGEQVMSR_;_DETADK(bi)NAANNGEQVMSR_;_DETADK(bi)NAANNGEQVMSR_;_DETADK(bi)NAANNGEQVMSR_;_DETADK(bi)NAANNGEQVMSR_;_DETADK(bi)NAANNGEQVMSR_;_DETADK(bi)NAANNGEQVMSR_;_DETADK(bi)NAANNGEQVMSR_;_DETADK(bi)NAANNGEQVMSR_;_DETADK(bi)NAANNGEQVMSR_;_DETADK(bi)NAANNGEQVM(ox…	623	NA	0.00107572	1.44604	-0.755159	NA	NA	NA	21.9016	21.7557	22.0475	21.1571	21.0902	21.1921	NA	NA	NA	NA	NA	NA
PF3D7_0202000	Plasmodium falciparum 3D7	knob-associated histidine-rich protein	KAHRP	Biotin (K)	0	1	1	DETADKNAANNGEQVMSR	_DETADK(bi)NAANNGEQVMSR_;_DETADK(bi)NAANNGEQVMSR_;_DETADK(bi)NAANNGEQVMSR_;_DETADK(bi)NAANNGEQVMSR_;_DETADK(bi)NAANNGEQVMSR_;_DETADK(bi)NAANNGEQVMSR_;_DETADK(bi)NAANNGEQVMSR_;_DETADK(bi)NAANNGEQVMSR_;_DETADK(bi)NAANNGEQVMSR_;_DETADK(bi)NAANNGEQVMSR_;_DETADK(bi)NAANNGEQVMSR_;_DETADK(bi)NAANNGEQVMSR_;_DETADK(bi)NAANNGEQVMSR_;_DETADK(bi)NAANNGEQVMSR_;_DETADK(bi)NAANNGEQVMSR_;_DETADK(bi)NAANNGEQVM(ox…	623	NA	0.0687564	0.569718	-0.207632	NA	NA	NA	25.1524	25.2216	25.34	24.9072	25.0643	25.1197	NA	NA	NA	NA	NA	NA
PF3D7_0202000	Plasmodium falciparum 3D7	knob-associated histidine-rich protein	KAHRP	Biotin (K)	0	1	2	DKTQGGKTDK	_DK(bi)TQGGKTDK_;_DK(bi)TQGGKTDK_;_DK(bi)TQGGKTDK_;_DK(bi)TQGGKTDK_;_DK(bi)TQGGKTDK_;_DK(bi)TQGGKTDK_	512	NA	0.297747	0.243015	-0.469716	NA	NA	NA	20.45	19.3413	20.0995	19.2197	19.3391	19.9229	NA	NA	NA	NA	NA	NA
PF3D7_0202000	Plasmodium falciparum 3D7	knob-associated histidine-rich protein	KAHRP	2 Biotin (K)	0	2	3	DKTQGGKTDKTGASTNAATNK	_DK(bi)TQGGKTDKTGASTNAATNK_;_DK(bi)TQGGKTDKTGASTNAATNK_;_DKTQGGK(bi)TDKTGASTNAATNK_;_DKTQGGK(bi)TDKTGASTNAATNK_;_DKTQGGK(bi)TDKTGASTNAATNK_;_DKTQGGKTDK(bi)TGASTNAATNK_;_DKTQGGKTDK(bi)TGASTNAATNK_;_DK(bi)TQGGKTDKTGASTNAATNK_;_DK(bi)TQGGKTDKTGASTNAATNK_;_DKTQGGK(bi)TDKTGASTNAATNK_;_DKTQGGK(bi)TDKTGASTNAATNK_;_DKTQGGK(bi)TDKTGASTNAATNK_;_DKTQGGKTDK(bi)TGASTNAATNK_;_DK(bi)TQGGKTDKTGASTNAATNK_;_DKTQGG…	512;517;520	NA	0.089783	0.514506	-0.442766	NA	NA	NA	25.0266	25.3615	25.0607	24.457	24.6377	25.0258	NA	NA	NA	NA	NA	NA
PF3D7_0202000	Plasmodium falciparum 3D7	knob-associated histidine-rich protein	KAHRP	Biotin (K)	0	1	3	DKTQGGKTDKTGASTNAATNK	_DK(bi)TQGGKTDKTGASTNAATNK_;_DK(bi)TQGGKTDKTGASTNAATNK_;_DKTQGGK(bi)TDKTGASTNAATNK_;_DKTQGGK(bi)TDKTGASTNAATNK_;_DKTQGGK(bi)TDKTGASTNAATNK_;_DKTQGGKTDK(bi)TGASTNAATNK_;_DKTQGGKTDK(bi)TGASTNAATNK_;_DK(bi)TQGGKTDKTGASTNAATNK_;_DK(bi)TQGGKTDKTGASTNAATNK_;_DKTQGGK(bi)TDKTGASTNAATNK_;_DKTQGGK(bi)TDKTGASTNAATNK_;_DKTQGGK(bi)TDKTGASTNAATNK_;_DKTQGGKTDK(bi)TGASTNAATNK_;_DK(bi)TQGGKTDKTGASTNAATNK_;_DKTQGG…	512;517;520	NA	0.155487	0.387804	-0.450472	0.199997	0.193025	0.444295	26.0813	25.7825	26.2591	25.5199	25.2548	25.9968	21.9778	22.3295	21.906	22.0028	22.8304	22.713
PF3D7_0202000	Plasmodium falciparum 3D7	knob-associated histidine-rich protein	KAHRP	3 Biotin (K)	0	3	3	DKTQGGKTDKTGASTNAATNK	_DK(bi)TQGGKTDKTGASTNAATNK_;_DK(bi)TQGGKTDKTGASTNAATNK_;_DKTQGGK(bi)TDKTGASTNAATNK_;_DKTQGGK(bi)TDKTGASTNAATNK_;_DKTQGGK(bi)TDKTGASTNAATNK_;_DKTQGGKTDK(bi)TGASTNAATNK_;_DKTQGGKTDK(bi)TGASTNAATNK_;_DK(bi)TQGGKTDKTGASTNAATNK_;_DK(bi)TQGGKTDKTGASTNAATNK_;_DKTQGGK(bi)TDKTGASTNAATNK_;_DKTQGGK(bi)TDKTGASTNAATNK_;_DKTQGGK(bi)TDKTGASTNAATNK_;_DKTQGGKTDK(bi)TGASTNAATNK_;_DK(bi)TQGGKTDKTGASTNAATNK_;_DKTQGG…	512;517;520	NA	NA	NA	NA	NA	NA	NA	NA	NA	NA	NA	NA	NA	NA	NA	NA	NA	NA	NA
PF3D7_0202000	Plasmodium falciparum 3D7	knob-associated histidine-rich protein	KAHRP	Biotin (K)	0	1	2	EARPGGGFKAYEEK	_EARPGGGFK(bi)AYEEK_;_EARPGGGFK(bi)AYEEK_;_EARPGGGFK(bi)AYEEK_;_EARPGGGFK(bi)AYEEK_;_EARPGGGFK(bi)AYEEK_;_EARPGGGFK(bi)AYEEK_;_EARPGGGFK(bi)AYEEK_;_EARPGGGFK(bi)AYEEK_;_EARPGGGFK(bi)AYEEK_;_EARPGGGFK(bi)AYEEK_;_EARPGGGFK(bi)AYEEK_;_EARPGGGFK(bi)AYEEK_;_EARPGGGFK(bi)AYEEK_;_EARPGGGFK(bi)AYEEK_;_EARPGGGFK(bi)AYEEK_;_EARPGGGFK(bi)AYEEK_;_EARPGGGFK(bi)AYEEK_;_EARPGGGFK(bi)AYEEK_;_EARPGGGFK(bi)AYEEK_;…	152	NA	0.453197	0.151289	-0.0969622	0.424859	0.108146	0.107535	24.6714	24.8836	25.0668	24.7623	24.8246	24.7441	25.1467	24.9067	24.834	25.2099	24.9494	25.0508
PF3D7_0202000	Plasmodium falciparum 3D7	knob-associated histidine-rich protein	KAHRP	Biotin (K)	0	1	3	EARPGGGFKAYEEKYESK	_EARPGGGFK(bi)AYEEKYESK_;_EARPGGGFK(bi)AYEEKYESK_;_EARPGGGFKAYEEK(bi)YESK_;_EARPGGGFK(bi)AYEEKYESK_;_EARPGGGFKAYEEK(bi)YESK_;_EARPGGGFK(bi)AYEEKYESK_;_EARPGGGFK(bi)AYEEKYESK_;_EARPGGGFK(bi)AYEEKYESK_;_EARPGGGFKAYEEK(bi)YESK_;_EARPGGGFKAYEEK(bi)YESK_;_EARPGGGFK(bi)AYEEKYESK_;_EARPGGGFK(bi)AYEEKYESK_;_EARPGGGFK(bi)AYEEKYESK_;_EARPGGGFKAYEEK(bi)YESK_;_EARPGGGFKAYEEK(bi)YESK_;_EARPGGGFKAYEEK(bi)YESK_…	152;157	NA	0.058772	0.599073	0.338771	0.954781	0.0109965	-0.00928472	27.6624	27.599	27.6415	28.1847	27.9918	27.7428	27.342	27.394	27.1613	27.5424	27.0725	27.2545
PF3D7_0202000	Plasmodium falciparum 3D7	knob-associated histidine-rich protein	KAHRP	2 Biotin (K)	0	2	3	EARPGGGFKAYEEKYESK	_EARPGGGFK(bi)AYEEKYESK_;_EARPGGGFK(bi)AYEEKYESK_;_EARPGGGFKAYEEK(bi)YESK_;_EARPGGGFK(bi)AYEEKYESK_;_EARPGGGFKAYEEK(bi)YESK_;_EARPGGGFK(bi)AYEEKYESK_;_EARPGGGFK(bi)AYEEKYESK_;_EARPGGGFK(bi)AYEEKYESK_;_EARPGGGFKAYEEK(bi)YESK_;_EARPGGGFKAYEEK(bi)YESK_;_EARPGGGFK(bi)AYEEKYESK_;_EARPGGGFK(bi)AYEEKYESK_;_EARPGGGFK(bi)AYEEKYESK_;_EARPGGGFKAYEEK(bi)YESK_;_EARPGGGFKAYEEK(bi)YESK_;_EARPGGGFKAYEEK(bi)YESK_…	152;157	NA	0.105083	0.49141	0.363214	NA	NA	NA	23.4809	23.7902	23.6601	24.2122	24.0917	23.717	NA	NA	NA	NA	NA	NA
PF3D7_0202000	Plasmodium falciparum 3D7	knob-associated histidine-rich protein	KAHRP	Biotin (K)	0	1	1	EASTSKEATK	_EASTSK(bi)EATK_;_EASTSK(bi)EATK_;_EASTSK(bi)EATK_;_EASTSK(bi)EATK_;_EASTSK(bi)EATK_;_EASTSK(bi)EATK_	551;561;571	NA	0.365197	0.189366	-0.402786	NA	NA	NA	21.3637	20.8652	21.4544	20.3315	20.6426	21.5008	NA	NA	NA	NA	NA	NA
PF3D7_0202000	Plasmodium falciparum 3D7	knob-associated histidine-rich protein	KAHRP	Biotin (K)	0	1	2	EASTSKEATKEASTSK	_EASTSKEATK(bi)EASTSK_;_EASTSKEATK(bi)EASTSK_;_EASTSK(bi)EATKEASTSK_;_EASTSKEATK(bi)EASTSK_;_EASTSKEATK(bi)EASTSK_;_EASTSK(bi)EATKEASTSK_;_EASTSK(bi)EATKEASTSK_;_EASTSKEATK(bi)EASTSK_;_EASTSKEATK(bi)EASTSK_;_EASTSK(bi)EATKEASTSK_;_EASTSKEATK(bi)EASTSK_;_EASTSKEATK(bi)EASTSK_;_EASTSK(bi)EATKEASTSK_;_EASTSK(bi)EATKEASTSK_;_EASTSKEATK(bi)EASTSK_;_EASTSKEATK(bi)EASTSK_;_EASTSK(bi)EATKEASTSK_;_EASTSKE…	555;575;551;571	NA	0.475501	0.141318	-0.188612	NA	NA	NA	24.1192	23.8303	24.3092	23.6381	23.7748	24.28	NA	NA	NA	NA	NA	NA
PF3D7_0202000	Plasmodium falciparum 3D7	knob-associated histidine-rich protein	KAHRP	2 Biotin (K)	0	2	2	EASTSKEATKEASTSK	_EASTSKEATK(bi)EASTSK_;_EASTSKEATK(bi)EASTSK_;_EASTSK(bi)EATKEASTSK_;_EASTSKEATK(bi)EASTSK_;_EASTSKEATK(bi)EASTSK_;_EASTSK(bi)EATKEASTSK_;_EASTSK(bi)EATKEASTSK_;_EASTSKEATK(bi)EASTSK_;_EASTSKEATK(bi)EASTSK_;_EASTSK(bi)EATKEASTSK_;_EASTSKEATK(bi)EASTSK_;_EASTSKEATK(bi)EASTSK_;_EASTSK(bi)EATKEASTSK_;_EASTSK(bi)EATKEASTSK_;_EASTSKEATK(bi)EASTSK_;_EASTSKEATK(bi)EASTSK_;_EASTSK(bi)EATKEASTSK_;_EASTSKE…	555;575;551;571	NA	NA	NA	NA	NA	NA	NA	NA	NA	NA	NA	NA	NA	NA	NA	NA	NA	NA	NA
PF3D7_0202000	Plasmodium falciparum 3D7	knob-associated histidine-rich protein	KAHRP	Biotin (K);Phospho (STY)	1	1	2	EASTSKEATKEASTSK	_EASTSKEATK(bi)EASTSK_;_EASTSKEATK(bi)EASTSK_;_EASTSK(bi)EATKEASTSK_;_EASTSKEATK(bi)EASTSK_;_EASTSKEATK(bi)EASTSK_;_EASTSK(bi)EATKEASTSK_;_EASTSK(bi)EATKEASTSK_;_EASTSKEATK(bi)EASTSK_;_EASTSKEATK(bi)EASTSK_;_EASTSK(bi)EATKEASTSK_;_EASTSKEATK(bi)EASTSK_;_EASTSKEATK(bi)EASTSK_;_EASTSK(bi)EATKEASTSK_;_EASTSK(bi)EATKEASTSK_;_EASTSKEATK(bi)EASTSK_;_EASTSKEATK(bi)EASTSK_;_EASTSK(bi)EATKEASTSK_;_EASTSKE…	555;575;551;571	548;568	0.0384484	0.683994	-0.604856	NA	NA	NA	23.4456	23.6404	23.6357	22.6969	22.8794	23.3308	NA	NA	NA	NA	NA	NA
PF3D7_0202000	Plasmodium falciparum 3D7	knob-associated histidine-rich protein	KAHRP	Biotin (K);Phospho (STY)	1	1	3	EASTSKEATKEASTSKEATK	_EASTSKEATK(bi)EASTSKEATK_;_EASTSKEATKEASTSK(bi)EATK_;_EASTSKEATK(bi)EASTSKEATK_;_EASTSKEATK(bi)EASTSKEATK_;_EASTSKEATK(bi)EASTSKEATK_;_EASTSKEATK(bi)EASTSKEATK_;_EASTSKEATK(bi)EASTSKEATK_;_EASTSKEATK(bi)EASTSKEATK_;_EASTSKEATK(bi)EASTSKEATK_;_EASTSKEATK(bi)EASTSKEATK_;_EASTSKEATK(bi)EASTSKEATK_;_EASTSKEATK(bi)EASTSKEATK_;_EASTSKEATK(bi)EASTSKEATK_;_EAS(ph)TSKEATK(bi)EASTSKEATK_;_EAS(ph)TSKEATK(b…	555;561	548	0.139616	0.417449	-0.606786	NA	NA	NA	21.4134	21.9185	22.3928	21.1274	21.136	21.6409	NA	NA	NA	NA	NA	NA
PF3D7_0202000	Plasmodium falciparum 3D7	knob-associated histidine-rich protein	KAHRP	Biotin (K)	0	1	3	EASTSKEATKEASTSKEATK	_EASTSKEATK(bi)EASTSKEATK_;_EASTSKEATKEASTSK(bi)EATK_;_EASTSKEATK(bi)EASTSKEATK_;_EASTSKEATK(bi)EASTSKEATK_;_EASTSKEATK(bi)EASTSKEATK_;_EASTSKEATK(bi)EASTSKEATK_;_EASTSKEATK(bi)EASTSKEATK_;_EASTSKEATK(bi)EASTSKEATK_;_EASTSKEATK(bi)EASTSKEATK_;_EASTSKEATK(bi)EASTSKEATK_;_EASTSKEATK(bi)EASTSKEATK_;_EASTSKEATK(bi)EASTSKEATK_;_EASTSKEATK(bi)EASTSKEATK_;_EAS(ph)TSKEATK(bi)EASTSKEATK_;_EAS(ph)TSKEATK(b…	555;561	NA	0.473597	0.141927	-0.485019	NA	NA	NA	21.8312	22.3047	21.1449	20.6038	20.9388	22.2832	NA	NA	NA	NA	NA	NA
PF3D7_0202000	Plasmodium falciparum 3D7	knob-associated histidine-rich protein	KAHRP	Biotin (K)	0	1	3	EASTSKEATKEASTSKGATK	_EASTSKEATKEASTSKGATK(bi)_;_EASTSKEATKEASTSK(bi)GATK_;_EASTSKEATKEASTSKGATK(bi)_;_EASTSKEATKEASTSK(bi)GATK_;_EASTSKEATKEASTSK(bi)GATK_;_EASTSKEATKEASTSK(bi)GATK_;_EASTSKEATKEASTSK(bi)GATK_;_EASTSKEATKEASTSK(bi)GATK_;_EASTSKEATKEASTSK(bi)GATK_;_EASTSKEATKEASTSK(bi)GATK_;_EASTSKEATKEASTSK(bi)GATK_;_EASTSKEATKEASTSK(bi)GATK_;_EASTSKEATKEASTSK(bi)GATK_;_EASTSKEATKEASTSK(bi)GATK_;_EASTSKEATKEASTSK(bi)…	585;581;571;575	NA	0.85523	0.0321309	-0.0675322	NA	NA	NA	21.1414	20.6141	21.611	21.1206	20.6908	21.3526	NA	NA	NA	NA	NA	NA
PF3D7_0202000	Plasmodium falciparum 3D7	knob-associated histidine-rich protein	KAHRP	Biotin (K);Phospho (STY)	1	1	3	EASTSKEATKEASTSKGATK	_EASTSKEATKEASTSKGATK(bi)_;_EASTSKEATKEASTSK(bi)GATK_;_EASTSKEATKEASTSKGATK(bi)_;_EASTSKEATKEASTSK(bi)GATK_;_EASTSKEATKEASTSK(bi)GATK_;_EASTSKEATKEASTSK(bi)GATK_;_EASTSKEATKEASTSK(bi)GATK_;_EASTSKEATKEASTSK(bi)GATK_;_EASTSKEATKEASTSK(bi)GATK_;_EASTSKEATKEASTSK(bi)GATK_;_EASTSKEATKEASTSK(bi)GATK_;_EASTSKEATKEASTSK(bi)GATK_;_EASTSKEATKEASTSK(bi)GATK_;_EASTSKEATKEASTSK(bi)GATK_;_EASTSKEATKEASTSK(bi)…	585;581;571;575	579;578;570	0.290661	0.249162	-0.313842	NA	NA	NA	21.0101	21.3712	21.6086	20.8597	20.7936	21.3952	NA	NA	NA	NA	NA	NA
PF3D7_0202000	Plasmodium falciparum 3D7	knob-associated histidine-rich protein	KAHRP	2 Biotin (K)	0	2	3	EASTSKEATKEASTSKGATK	_EASTSKEATKEASTSKGATK(bi)_;_EASTSKEATKEASTSK(bi)GATK_;_EASTSKEATKEASTSKGATK(bi)_;_EASTSKEATKEASTSK(bi)GATK_;_EASTSKEATKEASTSK(bi)GATK_;_EASTSKEATKEASTSK(bi)GATK_;_EASTSKEATKEASTSK(bi)GATK_;_EASTSKEATKEASTSK(bi)GATK_;_EASTSKEATKEASTSK(bi)GATK_;_EASTSKEATKEASTSK(bi)GATK_;_EASTSKEATKEASTSK(bi)GATK_;_EASTSKEATKEASTSK(bi)GATK_;_EASTSKEATKEASTSK(bi)GATK_;_EASTSKEATKEASTSK(bi)GATK_;_EASTSKEATKEASTSK(bi)…	585;581;571;575	NA	0.021069	0.785998	-0.338074	NA	NA	NA	20.6019	20.5057	20.6981	20.2668	20.136	20.3886	NA	NA	NA	NA	NA	NA
PF3D7_0202000	Plasmodium falciparum 3D7	knob-associated histidine-rich protein	KAHRP	Biotin (K);Phospho (STY)	1	1	2	EASTSKGATKEASTTEGATK	_EAS(ph)TSK(bi)GATKEASTTEGATK_;_EAS(ph)TSKGATK(bi)EASTTEGATK_;_EAS(ph)TSKGATK(bi)EASTTEGATK_;_EAS(ph)TSKGATK(bi)EASTTEGATK_;_EAS(ph)TSKGATK(bi)EASTTEGATK_;_EAS(ph)TSKGATK(bi)EASTTEGATK_;_EAS(ph)TSKGATK(bi)EASTTEGATK_;_EAS(ph)TSKGATK(bi)EASTTEGATK_;_EAS(ph)TSKGATK(bi)EASTTEGATK_;_EAS(ph)TSKGATK(bi)EASTTEGATK_;_EAS(ph)TSKGATK(bi)EASTTEGATK_;_EAS(ph)TSKGATK(bi)EASTTEGATK_;_EASTSK(bi)GATK(bi)EASTTEGA…	581;585	578	0.0274693	0.752506	-0.531139	NA	NA	NA	22.3775	22.6164	22.6794	21.9553	21.8517	22.2729	NA	NA	NA	NA	NA	NA
PF3D7_0202000	Plasmodium falciparum 3D7	knob-associated histidine-rich protein	KAHRP	2 Biotin (K)	0	2	2	EASTSKGATKEASTTEGATK	_EAS(ph)TSK(bi)GATKEASTTEGATK_;_EAS(ph)TSKGATK(bi)EASTTEGATK_;_EAS(ph)TSKGATK(bi)EASTTEGATK_;_EAS(ph)TSKGATK(bi)EASTTEGATK_;_EAS(ph)TSKGATK(bi)EASTTEGATK_;_EAS(ph)TSKGATK(bi)EASTTEGATK_;_EAS(ph)TSKGATK(bi)EASTTEGATK_;_EAS(ph)TSKGATK(bi)EASTTEGATK_;_EAS(ph)TSKGATK(bi)EASTTEGATK_;_EAS(ph)TSKGATK(bi)EASTTEGATK_;_EAS(ph)TSKGATK(bi)EASTTEGATK_;_EAS(ph)TSKGATK(bi)EASTTEGATK_;_EASTSK(bi)GATK(bi)EASTTEGA…	581;585	NA	0.116444	0.46364	-0.686409	NA	NA	NA	20.6254	21.0164	21.4255	20.336	19.8954	20.7767	NA	NA	NA	NA	NA	NA
PF3D7_0202000	Plasmodium falciparum 3D7	knob-associated histidine-rich protein	KAHRP	Biotin (K)	0	1	1	EASTTEGATKGASTTAGSTTGATTGANAVQSK	_EASTTEGATK(bi)GASTTAGSTTGATTGANAVQSK_;_EASTTEGATK(bi)GASTTAGSTTGATTGANAVQSK_;_EASTTEGATK(bi)GASTTAGSTTGATTGANAVQSK_;_EASTTEGATK(bi)GASTTAGSTTGATTGANAVQSK_;_EASTTEGATK(bi)GASTTAGSTTGATTGANAVQSK_;_EASTTEGATK(bi)GASTTAGSTTGATTGANAVQSK_;_EASTTEGATK(bi)GASTTAGSTTGATTGANAVQSK_;_EASTTEGATK(bi)GASTTAGSTTGATTGANAVQSK_;_EASTTEGATK(bi)GASTTAGSTTGATTGANAVQSK_;_EASTTEGATK(bi)GASTTAGSTTGATTGANAVQSK_;_EAST(ph)…	595	NA	0.0677454	0.571142	-0.645079	NA	NA	NA	24.3469	24.2771	24.8627	23.5632	23.7999	24.1883	NA	NA	NA	NA	NA	NA
PF3D7_0202000	Plasmodium falciparum 3D7	knob-associated histidine-rich protein	KAHRP	Biotin (K);Phospho (STY)	1	1	1	EASTTEGATKGASTTAGSTTGATTGANAVQSK	_EASTTEGATK(bi)GASTTAGSTTGATTGANAVQSK_;_EASTTEGATK(bi)GASTTAGSTTGATTGANAVQSK_;_EASTTEGATK(bi)GASTTAGSTTGATTGANAVQSK_;_EASTTEGATK(bi)GASTTAGSTTGATTGANAVQSK_;_EASTTEGATK(bi)GASTTAGSTTGATTGANAVQSK_;_EASTTEGATK(bi)GASTTAGSTTGATTGANAVQSK_;_EASTTEGATK(bi)GASTTAGSTTGATTGANAVQSK_;_EASTTEGATK(bi)GASTTAGSTTGATTGANAVQSK_;_EASTTEGATK(bi)GASTTAGSTTGATTGANAVQSK_;_EASTTEGATK(bi)GASTTAGSTTGATTGANAVQSK_;_EAST(ph)…	595	589;588;604;598	0.447785	0.153992	-0.477296	NA	NA	NA	20.7758	21.437	22.4919	21.0909	20.6245	21.5574	NA	NA	NA	NA	NA	NA
PF3D7_0202000	Plasmodium falciparum 3D7	knob-associated histidine-rich protein	KAHRP	Biotin (K)	0	1	2	EASTTEGATKGASTTAGSTTGATTGANAVQSKDETADK	_EASTTEGATK(bi)GASTTAGSTTGATTGANAVQSKDETADK_;_EASTTEGATK(bi)GASTTAGSTTGATTGANAVQSKDETADK_;_EASTTEGATK(bi)GASTTAGSTTGATTGANAVQSKDETADK_;_EASTTEGATK(bi)GASTTAGSTTGATTGANAVQSKDETADK_;_EASTTEGATK(bi)GASTTAGSTTGATTGANAVQSKDETADK_;_EASTTEGATK(bi)GASTTAGSTTGATTGANAVQSKDETADK_;_EASTTEGATK(bi)GASTTAGSTTGATTGANAVQSKDETADK_;_EASTTEGATK(bi)GASTTAGSTTGATTGANAVQSKDETADK_;_EASTTEGATK(bi)GASTTAGSTTGATTGANAVQSKDE…	595	NA	0.0893888	0.514506	-0.658949	NA	NA	NA	22.0279	22.1794	22.8299	21.4348	21.6332	21.9923	NA	NA	NA	NA	NA	NA
PF3D7_0202000	Plasmodium falciparum 3D7	knob-associated histidine-rich protein	KAHRP	Biotin (K)	0	1	1	EATKEASTSK	_EATK(bi)EASTSK_;_EATK(bi)EASTSK_;_EATK(bi)EASTSK_;_EATK(bi)EASTSK_;_EATK(bi)EASTSK_;_EATK(bi)EASTSK_;_EATK(bi)EASTSK_;_EATK(bi)EASTSK_;_EATK(bi)EASTSK_	555;565;575	NA	0.0991986	0.497574	-0.830702	NA	NA	NA	22.8838	22.8931	23.3809	21.7363	22.0234	22.906	NA	NA	NA	NA	NA	NA
PF3D7_0202000	Plasmodium falciparum 3D7	knob-associated histidine-rich protein	KAHRP	Biotin (K)	0	1	2	EATKEASTSKEATK	_EATK(bi)EASTSKEATK_;_EATK(bi)EASTSKEATK_;_EATK(bi)EASTSKEATK_;_EATK(bi)EASTSKEATK_;_EATKEASTSK(bi)EATK_;_EATK(bi)EASTSKEATK_;_EATK(bi)EASTSKEATK_;_EATKEASTSK(bi)EATK_;_EATKEASTSK(bi)EATK_;_EATKEASTSK(bi)EATK_;_EATKEASTSK(bi)EATK_;_EATKEASTSK(bi)EATK_;_EATKEASTSK(bi)EATK_	555;561	NA	0.191393	0.340352	-0.403762	NA	NA	NA	22.4254	22.1206	22.522	21.7007	21.751	22.405	NA	NA	NA	NA	NA	NA
PF3D7_0202000	Plasmodium falciparum 3D7	knob-associated histidine-rich protein	KAHRP	Biotin (K)	0	1	3	EATKEASTSKEATKEASTSK	_EATKEASTSKEATK(bi)EASTSK_;_EATKEASTSKEATK(bi)EASTSK_;_EATKEASTSK(bi)EATKEASTSK_;_EATK(bi)EASTSKEATKEASTSK_;_EATKEASTSKEATK(bi)EASTSK_;_EATKEASTSKEATK(bi)EASTSK_;_EATKEASTSK(bi)EATKEASTSK_;_EATK(bi)EASTSKEATKEASTSK_;_EATKEASTSKEATK(bi)EASTSK_;_EATKEASTSKEATK(bi)EASTSK_;_EATKEASTSKEATK(bi)EASTSK_;_EATKEASTSK(bi)EATKEASTSK_;_EATK(bi)EASTSKEATKEASTSK_;_EATK(bi)EASTSKEATKEASTSK_;_EATKEASTSKEATK(bi)EA…	565;561;555	NA	0.192352	0.340352	-0.435136	NA	NA	NA	23.3469	23.139	23.6103	22.7017	22.675	23.4141	NA	NA	NA	NA	NA	NA
PF3D7_0202000	Plasmodium falciparum 3D7	knob-associated histidine-rich protein	KAHRP	2 Biotin (K)	0	2	3	EATKEASTSKEATKEASTSK	_EATKEASTSKEATK(bi)EASTSK_;_EATKEASTSKEATK(bi)EASTSK_;_EATKEASTSK(bi)EATKEASTSK_;_EATK(bi)EASTSKEATKEASTSK_;_EATKEASTSKEATK(bi)EASTSK_;_EATKEASTSKEATK(bi)EASTSK_;_EATKEASTSK(bi)EATKEASTSK_;_EATK(bi)EASTSKEATKEASTSK_;_EATKEASTSKEATK(bi)EASTSK_;_EATKEASTSKEATK(bi)EASTSK_;_EATKEASTSKEATK(bi)EASTSK_;_EATKEASTSK(bi)EATKEASTSK_;_EATK(bi)EASTSKEATKEASTSK_;_EATK(bi)EASTSKEATKEASTSK_;_EATKEASTSKEATK(bi)EA…	565;561;555	NA	0.0390934	0.683994	1.05632	NA	NA	NA	20.2306	20.1314	20.181	21.2373	20.6339	21.8408	NA	NA	NA	NA	NA	NA
PF3D7_0202000	Plasmodium falciparum 3D7	knob-associated histidine-rich protein	KAHRP	Biotin (K);Phospho (STY)	1	1	3	EATKEASTSKEATKEASTSK	_EATKEASTSKEATK(bi)EASTSK_;_EATKEASTSKEATK(bi)EASTSK_;_EATKEASTSK(bi)EATKEASTSK_;_EATK(bi)EASTSKEATKEASTSK_;_EATKEASTSKEATK(bi)EASTSK_;_EATKEASTSKEATK(bi)EASTSK_;_EATKEASTSK(bi)EATKEASTSK_;_EATK(bi)EASTSKEATKEASTSK_;_EATKEASTSKEATK(bi)EASTSK_;_EATKEASTSKEATK(bi)EASTSK_;_EATKEASTSKEATK(bi)EASTSK_;_EATKEASTSK(bi)EATKEASTSK_;_EATK(bi)EASTSKEATKEASTSK_;_EATK(bi)EASTSKEATKEASTSK_;_EATKEASTSKEATK(bi)EA…	565;561;555	558;559	0.0670192	0.572858	-0.597759	NA	NA	NA	24.1266	23.7697	23.8485	22.9697	23.2758	23.7061	NA	NA	NA	NA	NA	NA
PF3D7_0202000	Plasmodium falciparum 3D7	knob-associated histidine-rich protein	KAHRP	2 Biotin (K)	0	2	2	EATKEASTSKGATK	_EATKEASTSK(bi)GATK_;_EATKEASTSK(bi)GATK_;_EATKEASTSK(bi)GATK_;_EATKEASTSK(bi)GATK_;_EATKEASTSK(bi)GATK_;_EATKEASTSK(bi)GATK_;_EATKEASTSK(bi)GATK_;_EATKEASTSK(bi)GATK_;_EATKEASTSK(bi)GATK_;_EATKEASTSK(bi)GATK_;_EATKEASTSK(bi)GATK_;_EATKEASTSK(bi)GATK_;_EATKEAST(ph)SK(bi)GATK_;_EATKEAS(ph)TSK(bi)GATK_;_EATKEAS(ph)TSK(bi)GATK_;_EATKEAS(ph)TSK(bi)GATK_;_EATKEAS(ph)TSK(bi)GATK_;_EATKEAS(ph)TSK(bi)GAT…	581;575;585	NA	0.568186	0.105193	-0.293782	NA	NA	NA	21.8557	21.3042	22.6749	21.2447	21.5868	22.122	NA	NA	NA	NA	NA	NA
PF3D7_0202000	Plasmodium falciparum 3D7	knob-associated histidine-rich protein	KAHRP	Biotin (K)	0	1	2	EATKEASTSKGATK	_EATKEASTSK(bi)GATK_;_EATKEASTSK(bi)GATK_;_EATKEASTSK(bi)GATK_;_EATKEASTSK(bi)GATK_;_EATKEASTSK(bi)GATK_;_EATKEASTSK(bi)GATK_;_EATKEASTSK(bi)GATK_;_EATKEASTSK(bi)GATK_;_EATKEASTSK(bi)GATK_;_EATKEASTSK(bi)GATK_;_EATKEASTSK(bi)GATK_;_EATKEASTSK(bi)GATK_;_EATKEAST(ph)SK(bi)GATK_;_EATKEAS(ph)TSK(bi)GATK_;_EATKEAS(ph)TSK(bi)GATK_;_EATKEAS(ph)TSK(bi)GATK_;_EATKEAS(ph)TSK(bi)GATK_;_EATKEAS(ph)TSK(bi)GAT…	581;575;585	NA	0.827182	0.0349703	-0.0880389	NA	NA	NA	22.8309	22.1017	23.143	22.4073	22.3648	23.0392	NA	NA	NA	NA	NA	NA
PF3D7_0202000	Plasmodium falciparum 3D7	knob-associated histidine-rich protein	KAHRP	Biotin (K);Phospho (STY)	1	1	2	EATKEASTSKGATK	_EATKEASTSK(bi)GATK_;_EATKEASTSK(bi)GATK_;_EATKEASTSK(bi)GATK_;_EATKEASTSK(bi)GATK_;_EATKEASTSK(bi)GATK_;_EATKEASTSK(bi)GATK_;_EATKEASTSK(bi)GATK_;_EATKEASTSK(bi)GATK_;_EATKEASTSK(bi)GATK_;_EATKEASTSK(bi)GATK_;_EATKEASTSK(bi)GATK_;_EATKEASTSK(bi)GATK_;_EATKEAST(ph)SK(bi)GATK_;_EATKEAS(ph)TSK(bi)GATK_;_EATKEAS(ph)TSK(bi)GATK_;_EATKEAS(ph)TSK(bi)GATK_;_EATKEAS(ph)TSK(bi)GATK_;_EATKEAS(ph)TSK(bi)GAT…	581;575;585	579;578	0.387029	0.180986	-0.700266	NA	NA	NA	19.4997	20.9186	21.3769	19.0866	20.6387	19.969	NA	NA	NA	NA	NA	NA
PF3D7_0202000	Plasmodium falciparum 3D7	knob-associated histidine-rich protein	KAHRP	Biotin (K)	0	1	3	EATKEASTSKGATKEASTTEGATK	_EATKEASTSK(bi)GATKEASTTEGATK_;_EATKEASTSK(bi)GATKEASTTEGATK_;_EATKEASTSK(bi)GATKEASTTEGATK_;_EATKEASTSK(bi)GATKEASTTEGATK_;_EATKEAS(ph)TSKGATK(bi)EASTTEGATK_;_EATKEAS(ph)TSKGATK(bi)EASTTEGATK_;_EATKEAS(ph)TSKGATK(bi)EASTTEGATK_;_EATKEAS(ph)TSKGATK(bi)EASTTEGATK_;_EATKEAS(ph)TSKGATK(bi)EASTTEGATK_;_EAT(ph)KEASTSKGATK(bi)EASTTEGATK_;_EATKEAS(ph)TSKGATK(bi)EASTTEGATK_;_EAT(ph)KEASTSKGATK(bi)EASTTEG…	581;585;575	NA	0.242659	0.288332	0.15614	NA	NA	NA	19.0794	18.7868	18.9331	18.9566	19.2218	19.0892	NA	NA	NA	NA	NA	NA
PF3D7_0202000	Plasmodium falciparum 3D7	knob-associated histidine-rich protein	KAHRP	Biotin (K);Phospho (STY)	1	1	3	EATKEASTSKGATKEASTTEGATK	_EATKEASTSK(bi)GATKEASTTEGATK_;_EATKEASTSK(bi)GATKEASTTEGATK_;_EATKEASTSK(bi)GATKEASTTEGATK_;_EATKEASTSK(bi)GATKEASTTEGATK_;_EATKEAS(ph)TSKGATK(bi)EASTTEGATK_;_EATKEAS(ph)TSKGATK(bi)EASTTEGATK_;_EATKEAS(ph)TSKGATK(bi)EASTTEGATK_;_EATKEAS(ph)TSKGATK(bi)EASTTEGATK_;_EATKEAS(ph)TSKGATK(bi)EASTTEGATK_;_EAT(ph)KEASTSKGATK(bi)EASTTEGATK_;_EATKEAS(ph)TSKGATK(bi)EASTTEGATK_;_EAT(ph)KEASTSKGATK(bi)EASTTEG…	581;585;575	578;574;580	0.0814102	0.52952	-0.531129	NA	NA	NA	22.6966	22.7691	22.9698	21.8899	22.3242	22.628	NA	NA	NA	NA	NA	NA
PF3D7_0202000	Plasmodium falciparum 3D7	knob-associated histidine-rich protein	KAHRP	2 Biotin (K);Phospho (STY)	1	2	3	EATKEASTSKGATKEASTTEGATK	_EATKEASTSK(bi)GATKEASTTEGATK_;_EATKEASTSK(bi)GATKEASTTEGATK_;_EATKEASTSK(bi)GATKEASTTEGATK_;_EATKEASTSK(bi)GATKEASTTEGATK_;_EATKEAS(ph)TSKGATK(bi)EASTTEGATK_;_EATKEAS(ph)TSKGATK(bi)EASTTEGATK_;_EATKEAS(ph)TSKGATK(bi)EASTTEGATK_;_EATKEAS(ph)TSKGATK(bi)EASTTEGATK_;_EATKEAS(ph)TSKGATK(bi)EASTTEGATK_;_EAT(ph)KEASTSKGATK(bi)EASTTEGATK_;_EATKEAS(ph)TSKGATK(bi)EASTTEGATK_;_EAT(ph)KEASTSKGATK(bi)EASTTEG…	581;585;575	578;574;580	NA	NA	NA	NA	NA	NA	NA	NA	NA	NA	NA	NA	NA	NA	NA	NA	NA	NA
PF3D7_0202000	Plasmodium falciparum 3D7	knob-associated histidine-rich protein	KAHRP	2 Biotin (K)	0	2	3	EATKEASTSKGATKEASTTEGATK	_EATKEASTSK(bi)GATKEASTTEGATK_;_EATKEASTSK(bi)GATKEASTTEGATK_;_EATKEASTSK(bi)GATKEASTTEGATK_;_EATKEASTSK(bi)GATKEASTTEGATK_;_EATKEAS(ph)TSKGATK(bi)EASTTEGATK_;_EATKEAS(ph)TSKGATK(bi)EASTTEGATK_;_EATKEAS(ph)TSKGATK(bi)EASTTEGATK_;_EATKEAS(ph)TSKGATK(bi)EASTTEGATK_;_EATKEAS(ph)TSKGATK(bi)EASTTEGATK_;_EAT(ph)KEASTSKGATK(bi)EASTTEGATK_;_EATKEAS(ph)TSKGATK(bi)EASTTEGATK_;_EAT(ph)KEASTSKGATK(bi)EASTTEG…	581;585;575	NA	0.286507	0.251785	-0.205769	NA	NA	NA	20.4506	20.2718	20.7805	20.2305	20.2077	20.4475	NA	NA	NA	NA	NA	NA
PF3D7_0202000	Plasmodium falciparum 3D7	knob-associated histidine-rich protein	KAHRP	Biotin (K)	0	1	2	ENETKNTAGENKK	_ENETKNTAGENK(bi)K_;_ENETKNTAGENKK(bi)_;_ENETKNTAGENK(bi)K_;_ENETKNTAGENK(bi)K_;_ENETKNTAGENK(bi)K_;_ENETKNTAGENKK(bi)_;_ENETKNTAGENK(bi)K_;_ENETKNTAGENK(bi)K_;_ENETKNTAGENK(bi)K_;_ENETKNTAGENK(bi)K_;_ENETKNTAGENK(bi)K_;_ENETKNTAGENK(bi)K_;_ENETKNTAGENK(bi)K_;_ENETKNTAGENK(bi)K_;_ENETKNTAGENK(bi)K_;_ENETKNTAGENK(bi)K_;_ENETKNTAGENK(bi)K_	490;491	NA	0.424543	0.16637	-0.322662	NA	NA	NA	22.1255	21.5962	21.0953	21.4432	20.8696	21.5362	NA	NA	NA	NA	NA	NA
PF3D7_0202000	Plasmodium falciparum 3D7	knob-associated histidine-rich protein	KAHRP	2 Biotin (K);Oxidation (M)	0	2	2	GASTTAGSTTGATTGANAVQSKDETADKNAANNGEQVMSR	_GASTTAGSTTGATTGANAVQSKDETADK(bi)NAANNGEQVM(ox)SR_;_GASTTAGSTTGATTGANAVQSK(bi)DETADKNAANNGEQVM(ox)SR_;_GASTTAGSTTGATTGANAVQSK(bi)DETADKNAANNGEQVM(ox)SR_;_GASTTAGSTTGATTGANAVQSK(bi)DETADKNAANNGEQVM(ox)SR_;_GASTTAGSTTGATTGANAVQSK(bi)DETADKNAANNGEQVM(ox)SR_;_GASTTAGSTTGATTGANAVQSK(bi)DETADKNAANNGEQVM(ox)SR_;_GASTTAGSTTGATTGANAVQSK(bi)DETADKNAANNGEQVM(ox)SR_;_GASTTAGSTTGATTGANAVQSK(bi)DETADKNAANNGEQV…	623;617	NA	NA	NA	NA	NA	NA	NA	NA	NA	NA	NA	NA	NA	NA	NA	NA	NA	NA	NA
PF3D7_0202000	Plasmodium falciparum 3D7	knob-associated histidine-rich protein	KAHRP	Biotin (K);Oxidation (M);Phospho (STY)	1	1	2	GASTTAGSTTGATTGANAVQSKDETADKNAANNGEQVMSR	_GASTTAGSTTGATTGANAVQSKDETADK(bi)NAANNGEQVM(ox)SR_;_GASTTAGSTTGATTGANAVQSK(bi)DETADKNAANNGEQVM(ox)SR_;_GASTTAGSTTGATTGANAVQSK(bi)DETADKNAANNGEQVM(ox)SR_;_GASTTAGSTTGATTGANAVQSK(bi)DETADKNAANNGEQVM(ox)SR_;_GASTTAGSTTGATTGANAVQSK(bi)DETADKNAANNGEQVM(ox)SR_;_GASTTAGSTTGATTGANAVQSK(bi)DETADKNAANNGEQVM(ox)SR_;_GASTTAGSTTGATTGANAVQSK(bi)DETADKNAANNGEQVM(ox)SR_;_GASTTAGSTTGATTGANAVQSK(bi)DETADKNAANNGEQV…	623;617	598;603;616;599;600	0.290483	0.249162	0.832248	NA	NA	NA	20.3594	20.4888	22.3973	21.9799	22.1936	21.5688	NA	NA	NA	NA	NA	NA
PF3D7_0202000	Plasmodium falciparum 3D7	knob-associated histidine-rich protein	KAHRP	2 Biotin (K)	0	2	2	GASTTAGSTTGATTGANAVQSKDETADKNAANNGEQVMSR	_GASTTAGSTTGATTGANAVQSKDETADK(bi)NAANNGEQVM(ox)SR_;_GASTTAGSTTGATTGANAVQSK(bi)DETADKNAANNGEQVM(ox)SR_;_GASTTAGSTTGATTGANAVQSK(bi)DETADKNAANNGEQVM(ox)SR_;_GASTTAGSTTGATTGANAVQSK(bi)DETADKNAANNGEQVM(ox)SR_;_GASTTAGSTTGATTGANAVQSK(bi)DETADKNAANNGEQVM(ox)SR_;_GASTTAGSTTGATTGANAVQSK(bi)DETADKNAANNGEQVM(ox)SR_;_GASTTAGSTTGATTGANAVQSK(bi)DETADKNAANNGEQVM(ox)SR_;_GASTTAGSTTGATTGANAVQSK(bi)DETADKNAANNGEQV…	623;617	NA	0.857304	0.0321309	0.0450244	NA	NA	NA	24.9191	24.8203	25.5301	25.0692	25.2877	25.0477	NA	NA	NA	NA	NA	NA
PF3D7_0202000	Plasmodium falciparum 3D7	knob-associated histidine-rich protein	KAHRP	Biotin (K);Phospho (STY)	1	1	2	GASTTAGSTTGATTGANAVQSKDETADKNAANNGEQVMSR	_GASTTAGSTTGATTGANAVQSKDETADK(bi)NAANNGEQVM(ox)SR_;_GASTTAGSTTGATTGANAVQSK(bi)DETADKNAANNGEQVM(ox)SR_;_GASTTAGSTTGATTGANAVQSK(bi)DETADKNAANNGEQVM(ox)SR_;_GASTTAGSTTGATTGANAVQSK(bi)DETADKNAANNGEQVM(ox)SR_;_GASTTAGSTTGATTGANAVQSK(bi)DETADKNAANNGEQVM(ox)SR_;_GASTTAGSTTGATTGANAVQSK(bi)DETADKNAANNGEQVM(ox)SR_;_GASTTAGSTTGATTGANAVQSK(bi)DETADKNAANNGEQVM(ox)SR_;_GASTTAGSTTGATTGANAVQSK(bi)DETADKNAANNGEQV…	623;617	598;603;616;599;600	0.0254284	0.761351	-0.550496	NA	NA	NA	25.3691	25.5383	25.3752	24.6421	25.1514	24.8375	NA	NA	NA	NA	NA	NA
PF3D7_0202000	Plasmodium falciparum 3D7	knob-associated histidine-rich protein	KAHRP	2 Biotin (K);Phospho (STY)	1	2	2	GASTTAGSTTGATTGANAVQSKDETADKNAANNGEQVMSR	_GASTTAGSTTGATTGANAVQSKDETADK(bi)NAANNGEQVM(ox)SR_;_GASTTAGSTTGATTGANAVQSK(bi)DETADKNAANNGEQVM(ox)SR_;_GASTTAGSTTGATTGANAVQSK(bi)DETADKNAANNGEQVM(ox)SR_;_GASTTAGSTTGATTGANAVQSK(bi)DETADKNAANNGEQVM(ox)SR_;_GASTTAGSTTGATTGANAVQSK(bi)DETADKNAANNGEQVM(ox)SR_;_GASTTAGSTTGATTGANAVQSK(bi)DETADKNAANNGEQVM(ox)SR_;_GASTTAGSTTGATTGANAVQSK(bi)DETADKNAANNGEQVM(ox)SR_;_GASTTAGSTTGATTGANAVQSK(bi)DETADKNAANNGEQV…	623;617	598;603;616;599;600	0.626034	0.085	0.34429	NA	NA	NA	21.6177	23.4733	22.5455	22.795	22.2949	23.5795	NA	NA	NA	NA	NA	NA
PF3D7_0202000	Plasmodium falciparum 3D7	knob-associated histidine-rich protein	KAHRP	Biotin (K)	0	1	2	GASTTAGSTTGATTGANAVQSKDETADKNAANNGEQVMSR	_GASTTAGSTTGATTGANAVQSKDETADK(bi)NAANNGEQVM(ox)SR_;_GASTTAGSTTGATTGANAVQSK(bi)DETADKNAANNGEQVM(ox)SR_;_GASTTAGSTTGATTGANAVQSK(bi)DETADKNAANNGEQVM(ox)SR_;_GASTTAGSTTGATTGANAVQSK(bi)DETADKNAANNGEQVM(ox)SR_;_GASTTAGSTTGATTGANAVQSK(bi)DETADKNAANNGEQVM(ox)SR_;_GASTTAGSTTGATTGANAVQSK(bi)DETADKNAANNGEQVM(ox)SR_;_GASTTAGSTTGATTGANAVQSK(bi)DETADKNAANNGEQVM(ox)SR_;_GASTTAGSTTGATTGANAVQSK(bi)DETADKNAANNGEQV…	623;617	NA	0.633117	0.0830016	-0.0849689	NA	NA	NA	26.5069	26.6766	26.8663	26.3546	26.7874	26.6528	NA	NA	NA	NA	NA	NA
PF3D7_0202000	Plasmodium falciparum 3D7	knob-associated histidine-rich protein	KAHRP	Biotin (K);Oxidation (M)	0	1	2	GASTTAGSTTGATTGANAVQSKDETADKNAANNGEQVMSR	_GASTTAGSTTGATTGANAVQSKDETADK(bi)NAANNGEQVM(ox)SR_;_GASTTAGSTTGATTGANAVQSK(bi)DETADKNAANNGEQVM(ox)SR_;_GASTTAGSTTGATTGANAVQSK(bi)DETADKNAANNGEQVM(ox)SR_;_GASTTAGSTTGATTGANAVQSK(bi)DETADKNAANNGEQVM(ox)SR_;_GASTTAGSTTGATTGANAVQSK(bi)DETADKNAANNGEQVM(ox)SR_;_GASTTAGSTTGATTGANAVQSK(bi)DETADKNAANNGEQVM(ox)SR_;_GASTTAGSTTGATTGANAVQSK(bi)DETADKNAANNGEQVM(ox)SR_;_GASTTAGSTTGATTGANAVQSK(bi)DETADKNAANNGEQV…	623;617	NA	0.735537	0.0526136	0.160928	NA	NA	NA	23.5491	22.7327	24.2564	23.5547	23.7493	23.717	NA	NA	NA	NA	NA	NA
PF3D7_0202000	Plasmodium falciparum 3D7	knob-associated histidine-rich protein	KAHRP	Biotin (K)	0	1	1	GATKEASTSK	_GATK(bi)EASTSK_;_GATK(bi)EASTSK_;_GATK(bi)EASTSK_;_GATK(bi)EASTSK_;_GATK(bi)EASTSK_;_GATK(bi)EASTSK_;_GATK(bi)EASTSK_;_GATK(bi)EASTSK_;_GATK(bi)EASTSK_;_GATK(bi)EASTSK_;_GATK(bi)EASTSK_;_GATK(bi)EASTSK_	545	NA	0.415697	0.167731	-0.327999	NA	NA	NA	23.1675	22.6313	23.3466	22.3166	22.5599	23.2849	NA	NA	NA	NA	NA	NA
PF3D7_0202000	Plasmodium falciparum 3D7	knob-associated histidine-rich protein	KAHRP	Biotin (K)	0	1	2	GATKEASTSKEATK	_GATK(bi)EASTSKEATK_;_GATK(bi)EASTSKEATK_;_GATK(bi)EASTSKEATK_;_GATK(bi)EASTSKEATK_;_GATK(bi)EASTSKEATK_;_GATK(bi)EASTSKEATK_;_GATK(bi)EASTSKEATK_	545	NA	0.713039	0.0611878	-0.134976	NA	NA	NA	22.8309	22.0686	23.0152	22.3109	22.3334	22.8655	NA	NA	NA	NA	NA	NA
PF3D7_0202000	Plasmodium falciparum 3D7	knob-associated histidine-rich protein	KAHRP	Biotin (K);Phospho (STY)	1	1	3	GATKEASTSKEATKEASTSK	_GATKEASTSK(bi)EATKEASTSK_;_GATK(bi)EASTSKEATKEASTSK_;_GATKEASTSKEATK(bi)EASTSK_;_GATK(bi)EASTSKEATKEASTSK_;_GATKEASTSKEATK(bi)EASTSK_;_GATKEASTSK(bi)EATKEASTSK_;_GATK(bi)EASTSKEATKEASTSK_;_GATK(bi)EASTSKEATKEASTSK_;_GATKEASTSKEATK(bi)EASTSK_;_GATKEASTSK(bi)EATKEASTSK_;_GATK(bi)EASTSKEATKEASTSK_;_GATK(bi)EASTSKEATKEASTSK_;_GATKEASTSKEATK(bi)EASTSK_;_GATKEASTSK(bi)EATKEASTSK_;_GATKEASTSK(bi)EATKEA…	551;545;555	548	0.304541	0.235701	-1.90063	NA	NA	NA	22.3368	22.313	22.7645	22.0673	17.3564	22.2887	NA	NA	NA	NA	NA	NA
PF3D7_0202000	Plasmodium falciparum 3D7	knob-associated histidine-rich protein	KAHRP	Biotin (K)	0	1	3	GATKEASTSKEATKEASTSK	_GATKEASTSK(bi)EATKEASTSK_;_GATK(bi)EASTSKEATKEASTSK_;_GATKEASTSKEATK(bi)EASTSK_;_GATK(bi)EASTSKEATKEASTSK_;_GATKEASTSKEATK(bi)EASTSK_;_GATKEASTSK(bi)EATKEASTSK_;_GATK(bi)EASTSKEATKEASTSK_;_GATK(bi)EASTSKEATKEASTSK_;_GATKEASTSKEATK(bi)EASTSK_;_GATKEASTSK(bi)EATKEASTSK_;_GATK(bi)EASTSKEATKEASTSK_;_GATK(bi)EASTSKEATKEASTSK_;_GATKEASTSKEATK(bi)EASTSK_;_GATKEASTSK(bi)EATKEASTSK_;_GATKEASTSK(bi)EATKEA…	551;545;555	NA	0.0412236	0.676463	0.617721	NA	NA	NA	21.996	21.8016	22.4768	22.6059	22.7947	22.727	NA	NA	NA	NA	NA	NA
PF3D7_0202000	Plasmodium falciparum 3D7	knob-associated histidine-rich protein	KAHRP	Biotin (K)	0	1	1	GATKEASTTEGATK	_GATK(bi)EASTTEGATK_;_GATK(bi)EASTTEGATK_;_GATK(bi)EASTTEGATK_;_GATK(bi)EASTTEGATK_;_GATK(bi)EASTTEGATK_;_GATK(bi)EASTTEGATK_;_GATK(bi)EASTTEGATK_;_GATK(bi)EASTTEGATK_;_GATK(bi)EASTTEGATK_;_GATK(bi)EASTTEGATK_;_GATK(bi)EASTTEGATK_	585	NA	0.181841	0.347924	-0.435292	NA	NA	NA	23.4336	23.2748	23.7843	22.7867	22.8946	23.5055	NA	NA	NA	NA	NA	NA
PF3D7_0202000	Plasmodium falciparum 3D7	knob-associated histidine-rich protein	KAHRP	Biotin (K)	0	1	2	GATKEASTTEGATKGASTTAGSTTGATTGANAVQSK	_GATK(bi)EASTTEGATKGASTTAGSTTGATTGANAVQSK_;_GATK(bi)EASTTEGATKGASTTAGSTTGATTGANAVQSK_;_GATKEASTTEGATK(bi)GASTTAGSTTGATTGANAVQSK_	585;595	NA	NA	NA	NA	NA	NA	NA	NA	NA	NA	NA	NA	NA	NA	NA	NA	NA	NA	NA
PF3D7_0202000	Plasmodium falciparum 3D7	knob-associated histidine-rich protein	KAHRP	Biotin (K)	0	1	1	GQAQLQEAGKK	_GQAQLQEAGK(bi)K_;_GQAQLQEAGK(bi)K_;_GQAQLQEAGK(bi)K_;_GQAQLQEAGK(bi)K_;_GQAQLQEAGK(bi)K_;_GQAQLQEAGK(bi)K_	645	NA	0.733986	0.0526136	-0.0620022	NA	NA	NA	21.3669	21.4996	21.7925	21.3245	21.4377	21.7107	NA	NA	NA	NA	NA	NA
PF3D7_0202000	Plasmodium falciparum 3D7	knob-associated histidine-rich protein	KAHRP	Biotin (K)	0	1	1	GQCAAEGATKGATK	_GQCAAEGATK(bi)GATK_;_GQCAAEGATK(bi)GATK_;_GQCAAEGATK(bi)GATK_;_GQCAAEGATK(bi)GATK_;_GQCAAEGATK(bi)GATK_;_GQCAAEGATKGATK(bi)_;_GQCAAEGATK(bi)GATK_;_GQCAAEGATK(bi)GATK_;_GQCAAEGATK(bi)GATK_;_GQCAAEGATK(bi)GATK_;_GQCAAEGATK(bi)GATK_;_GQCAAEGATK(bi)GATK_;_GQCAAEGATK(bi)GATK_;_GQCAAEGATK(bi)GATK_;_GQCAAEGATK(bi)GATK_;_GQCAAEGATK(bi)GATK_;_GQCAAEGATK(bi)GATK_;_GQCAAEGATK(bi)GATK_;_GQCAAEGATK(bi)GATK_;…	541;545	NA	0.063542	0.586202	-0.501842	0.129373	0.270665	0.249653	25.5928	25.5741	25.6901	24.8697	24.9827	25.4992	21.9489	21.8544	21.7599	21.9563	22.3397	22.0161
PF3D7_0202000	Plasmodium falciparum 3D7	knob-associated histidine-rich protein	KAHRP	Biotin (K)	0	1	2	GQCAAEGATKGATKEASTSK	_GQCAAEGATKGATK(bi)EASTSK_;_GQCAAEGATKGATK(bi)EASTSK_;_GQCAAEGATKGATK(bi)EASTSK_;_GQCAAEGATK(bi)GATKEASTSK_;_GQCAAEGATKGATK(bi)EASTSK_;_GQCAAEGATK(bi)GATKEASTSK_;_GQCAAEGATKGATK(bi)EASTSK_;_GQCAAEGATK(bi)GATKEASTSK_;_GQCAAEGATKGATK(bi)EASTSK_;_GQCAAEGATK(bi)GATKEASTSK_;_GQCAAEGATKGATK(bi)EASTSK_;_GQCAAEGATK(bi)GATKEASTSK_;_GQCAAEGATK(bi)GATKEASTSK_;_GQCAAEGATK(bi)GATKEASTSK_;_GQCAAEGATK(bi)GATK(b…	545;541;551	NA	0.504284	0.132448	0.194828	NA	NA	NA	22.2286	21.7583	22.5967	22.493	22.503	22.1721	NA	NA	NA	NA	NA	NA
PF3D7_0202000	Plasmodium falciparum 3D7	knob-associated histidine-rich protein	KAHRP	2 Biotin (K)	0	2	2	GQCAAEGATKGATKEASTSK	_GQCAAEGATKGATK(bi)EASTSK_;_GQCAAEGATKGATK(bi)EASTSK_;_GQCAAEGATKGATK(bi)EASTSK_;_GQCAAEGATK(bi)GATKEASTSK_;_GQCAAEGATKGATK(bi)EASTSK_;_GQCAAEGATK(bi)GATKEASTSK_;_GQCAAEGATKGATK(bi)EASTSK_;_GQCAAEGATK(bi)GATKEASTSK_;_GQCAAEGATKGATK(bi)EASTSK_;_GQCAAEGATK(bi)GATKEASTSK_;_GQCAAEGATKGATK(bi)EASTSK_;_GQCAAEGATK(bi)GATKEASTSK_;_GQCAAEGATK(bi)GATKEASTSK_;_GQCAAEGATK(bi)GATKEASTSK_;_GQCAAEGATK(bi)GATK(b…	545;541;551	NA	0.0624369	0.586202	-0.499336	NA	NA	NA	22.9259	22.6903	23.0272	22.0834	22.4	22.6621	NA	NA	NA	NA	NA	NA
PF3D7_0202000	Plasmodium falciparum 3D7	knob-associated histidine-rich protein	KAHRP	Biotin (K);Phospho (STY)	1	1	3	GQCAAEGATKGATKEASTSKEATK	_GQCAAEGATK(bi)GATKEASTSKEATK_;_GQCAAEGATK(bi)GATKEASTSKEATK_;_GQCAAEGATK(bi)GATKEASTSKEATK_;_GQCAAEGATK(bi)GATKEASTSKEATK_;_GQCAAEGATK(bi)GAT(ph)KEASTSKEATK_;_GQCAAEGATKGAT(ph)K(bi)EASTSKEATK_;_GQCAAEGATK(bi)GAT(ph)KEASTSKEATK_;_GQCAAEGATK(bi)GAT(ph)KEASTSKEATK_;_GQCAAEGATK(bi)GAT(ph)KEASTSKEATK_;_GQCAAEGATK(bi)GAT(ph)KEASTSKEATK_;_GQCAAEGATK(bi)GATK(bi)EASTSKEATK_;_GQCAAEGATK(bi)GATK(bi)EASTSKE…	541;545	544	0.146359	0.404742	-0.408232	NA	NA	NA	21.767	22.3663	22.3235	21.7693	21.526	21.9368	NA	NA	NA	NA	NA	NA
PF3D7_0202000	Plasmodium falciparum 3D7	knob-associated histidine-rich protein	KAHRP	Biotin (K)	0	1	3	GQCAAEGATKGATKEASTSKEATK	_GQCAAEGATK(bi)GATKEASTSKEATK_;_GQCAAEGATK(bi)GATKEASTSKEATK_;_GQCAAEGATK(bi)GATKEASTSKEATK_;_GQCAAEGATK(bi)GATKEASTSKEATK_;_GQCAAEGATK(bi)GAT(ph)KEASTSKEATK_;_GQCAAEGATKGAT(ph)K(bi)EASTSKEATK_;_GQCAAEGATK(bi)GAT(ph)KEASTSKEATK_;_GQCAAEGATK(bi)GAT(ph)KEASTSKEATK_;_GQCAAEGATK(bi)GAT(ph)KEASTSKEATK_;_GQCAAEGATK(bi)GAT(ph)KEASTSKEATK_;_GQCAAEGATK(bi)GATK(bi)EASTSKEATK_;_GQCAAEGATK(bi)GATK(bi)EASTSKE…	541;545	NA	0.00284226	1.25178	0.451785	NA	NA	NA	19.41	19.3154	19.3627	19.9246	19.7043	19.8145	NA	NA	NA	NA	NA	NA
PF3D7_0202000	Plasmodium falciparum 3D7	knob-associated histidine-rich protein	KAHRP	Biotin (K)	0	1	1	HKDNEDAESVK	_HK(bi)DNEDAESVK_;_HK(bi)DNEDAESVK_;_HK(bi)DNEDAESVK_;_HK(bi)DNEDAESVK_;_HK(bi)DNEDAESVK_;_HK(bi)DNEDAESVK_;_HK(bi)DNEDAESVK_;_HK(bi)DNEDAESVK_;_HK(bi)DNEDAESVK_;_HK(bi)DNEDAESVK_;_HK(bi)DNEDAESVK_	396;423	NA	0.440015	0.159438	0.420511	NA	NA	NA	19.533	18.6913	20.1732	19.7097	19.5907	20.3586	NA	NA	NA	NA	NA	NA
PF3D7_0202000	Plasmodium falciparum 3D7	knob-associated histidine-rich protein	KAHRP	Biotin (K)	0	1	2	HKDNEDAESVKSK	_HKDNEDAESVK(bi)SK_;_HKDNEDAESVK(bi)SK_;_HKDNEDAESVK(bi)SK_;_HKDNEDAESVK(bi)SK_;_HK(bi)DNEDAESVKSK_;_HKDNEDAESVK(bi)SK_;_HKDNEDAESVK(bi)SK_;_HKDNEDAESVK(bi)SK_;_HK(bi)DNEDAESVKSK_	405;432;396;423	NA	0.295915	0.243936	0.239428	NA	NA	NA	20.1386	20.6393	20.4959	20.5447	20.5186	20.9287	NA	NA	NA	NA	NA	NA
PF3D7_0202000	Plasmodium falciparum 3D7	knob-associated histidine-rich protein	KAHRP	Biotin (K)	0	1	3	HKDNEDAESVKSKK	_HKDNEDAESVK(bi)SKK_;_HKDNEDAESVK(bi)SKK_;_HKDNEDAESVKSK(bi)K_;_HKDNEDAESVKSKK(bi)_;_HKDNEDAESVKSK(bi)K_;_HKDNEDAESVKSKK(bi)_;_HKDNEDAESVKSK(bi)K_;_HKDNEDAESVKSKK(bi)_;_HKDNEDAESVKSKK(bi)_;_HKDNEDAESVKSKK(bi)_;_HKDNEDAESVKSK(bi)K_;_HKDNEDAESVKSKK(bi)_	405;432;407;434;408;435	NA	0.444056	0.156055	0.232174	NA	NA	NA	21.917	21.2961	21.9512	21.8565	21.7163	22.288	NA	NA	NA	NA	NA	NA
PF3D7_0202000	Plasmodium falciparum 3D7	knob-associated histidine-rich protein	KAHRP	Biotin (K)	0	1	2	HYKLKENVVDGK	_HYK(bi)LKENVVDGK_;_HYK(bi)LKENVVDGK_;_HYK(bi)LKENVVDGK_;_HYK(bi)LKENVVDGK_;_HYK(bi)LKENVVDGK_;_HYKLK(bi)ENVVDGK_;_HYK(bi)LKENVVDGK_;_HYKLK(bi)ENVVDGK_;_HYK(bi)LKENVVDGK_;_HYKLK(bi)ENVVDGK_;_HYK(bi)LKENVVDGK_;_HYKLK(bi)ENVVDGK_;_HYK(bi)LKENVVDGK_;_HYK(bi)LKENVVDGK_;_HYK(bi)LKENVVDGK_;_HYKLK(bi)ENVVDGK_;_HYK(bi)LKENVVDGK_;_HYK(bi)LKENVVDGK_;_HYKLK(bi)ENVVDGK_;_HYK(bi)LKENVVDGK_;_HYK(bi)LKENVVDGK_;…	164;166	NA	0.130009	0.435651	0.256998	0.636358	0.0612227	-0.132538	23.3341	23.5231	23.6215	23.8903	23.8164	23.543	24.0201	24.6985	24.3699	24.4997	23.9157	24.2755
PF3D7_0202000	Plasmodium falciparum 3D7	knob-associated histidine-rich protein	KAHRP	2 Biotin (K)	0	2	2	HYKLKENVVDGK	_HYK(bi)LKENVVDGK_;_HYK(bi)LKENVVDGK_;_HYK(bi)LKENVVDGK_;_HYK(bi)LKENVVDGK_;_HYK(bi)LKENVVDGK_;_HYKLK(bi)ENVVDGK_;_HYK(bi)LKENVVDGK_;_HYKLK(bi)ENVVDGK_;_HYK(bi)LKENVVDGK_;_HYKLK(bi)ENVVDGK_;_HYK(bi)LKENVVDGK_;_HYKLK(bi)ENVVDGK_;_HYK(bi)LKENVVDGK_;_HYK(bi)LKENVVDGK_;_HYK(bi)LKENVVDGK_;_HYKLK(bi)ENVVDGK_;_HYK(bi)LKENVVDGK_;_HYK(bi)LKENVVDGK_;_HYKLK(bi)ENVVDGK_;_HYK(bi)LKENVVDGK_;_HYK(bi)LKENVVDGK_;…	164;166	NA	0.307766	0.234328	-0.150426	NA	NA	NA	24.0266	23.9533	23.9585	23.9437	23.5761	23.9673	NA	NA	NA	NA	NA	NA
PF3D7_0202000	Plasmodium falciparum 3D7	knob-associated histidine-rich protein	KAHRP	Biotin (K)	0	1	3	HYKLKENVVDGKK	_HYK(bi)LKENVVDGKK_;_HYK(bi)LKENVVDGKK_;_HYK(bi)LKENVVDGKK_;_HYKLK(bi)ENVVDGKK_;_HYK(bi)LKENVVDGKK_;_HYK(bi)LKENVVDGKK_;_HYK(bi)LKENVVDGKK_;_HYKLK(bi)ENVVDGKK_;_HYKLK(bi)ENVVDGKK_;_HYK(bi)LKENVVDGKK_;_HYK(bi)LKENVVDGKK_;_HYK(bi)LKENVVDGKK_;_HYK(bi)LKENVVDGKK_;_HYK(bi)LKENVVDGKK_;_HYK(bi)LKENVVDGKK_;_HYK(bi)LKENVVDGKK_;_HYK(bi)LKENVVDGKK_;_HYK(bi)LKENVVDGKK_;_HYK(bi)LKENVVDGKK_;_HYK(bi)LKENVVDGKK_…	164;166	NA	0.754221	0.0469583	0.390054	0.950974	0.0109965	-0.0154914	23.3081	23.3129	21.5486	24.5461	21.1785	23.6151	24.5928	25.0919	24.6143	24.7771	24.4409	25.0345
PF3D7_0202000	Plasmodium falciparum 3D7	knob-associated histidine-rich protein	KAHRP	2 Biotin (K)	0	2	3	HYKLKENVVDGKK	_HYK(bi)LKENVVDGKK_;_HYK(bi)LKENVVDGKK_;_HYK(bi)LKENVVDGKK_;_HYKLK(bi)ENVVDGKK_;_HYK(bi)LKENVVDGKK_;_HYK(bi)LKENVVDGKK_;_HYK(bi)LKENVVDGKK_;_HYKLK(bi)ENVVDGKK_;_HYKLK(bi)ENVVDGKK_;_HYK(bi)LKENVVDGKK_;_HYK(bi)LKENVVDGKK_;_HYK(bi)LKENVVDGKK_;_HYK(bi)LKENVVDGKK_;_HYK(bi)LKENVVDGKK_;_HYK(bi)LKENVVDGKK_;_HYK(bi)LKENVVDGKK_;_HYK(bi)LKENVVDGKK_;_HYK(bi)LKENVVDGKK_;_HYK(bi)LKENVVDGKK_;_HYK(bi)LKENVVDGKK_…	164;166	NA	0.182965	0.34755	-0.557572	0.430212	0.108146	-0.391541	25.8599	25.9002	25.7178	24.5928	25.5118	25.7005	23.2645	23.1434	23.0887	23.6529	22.2291	22.44
PF3D7_0202000	Plasmodium falciparum 3D7	knob-associated histidine-rich protein	KAHRP	Biotin (K)	0	1	2	KENETKNTAGENK	_K(bi)ENETKNTAGENK_	478	NA	NA	NA	NA	NA	NA	NA	NA	NA	NA	NA	NA	NA	NA	NA	NA	NA	NA	NA
PF3D7_0202000	Plasmodium falciparum 3D7	knob-associated histidine-rich protein	KAHRP	Biotin (K)	0	1	3	KENETKNTAGENKK	_KENETKNTAGENK(bi)K_;_KENETKNTAGENK(bi)K_;_KENETKNTAGENK(bi)K_;_KENETKNTAGENKK(bi)_;_KENETKNTAGENK(bi)K_;_KENETKNTAGENK(bi)K_;_KENETKNTAGENK(bi)K_;_KENETKNTAGENK(bi)K_;_KENETK(bi)NTAGENKK_;_KENETKNTAGENK(bi)K_;_KENETK(bi)NTAGENKK_;_KENETK(bi)NTAGENKK_	490;491;483	NA	0.499359	0.132867	-0.291276	NA	NA	NA	21.3671	20.7501	21.4898	20.5303	20.6581	21.5448	NA	NA	NA	NA	NA	NA
PF3D7_0202000	Plasmodium falciparum 3D7	knob-associated histidine-rich protein	KAHRP	Biotin (K)	0	1	2	KHKDNEDAESVK	_KHK(bi)DNEDAESVK_;_KHK(bi)DNEDAESVK_;_KHK(bi)DNEDAESVK_;_KHK(bi)DNEDAESVK_;_KHK(bi)DNEDAESVK_;_KHK(bi)DNEDAESVK_	396;423	NA	0.296883	0.243562	0.410381	NA	NA	NA	18.5488	18.2511	19.0725	18.9597	18.6541	19.4898	NA	NA	NA	NA	NA	NA
PF3D7_0202000	Plasmodium falciparum 3D7	knob-associated histidine-rich protein	KAHRP	Biotin (K);Oxidation (M)	0	1	2	KRFPLGMNDEDEEGK	_K(bi)RFPLGMNDEDEEGK_;_K(bi)RFPLGMNDEDEEGK_;_K(bi)RFPLGMNDEDEEGK_;_K(bi)RFPLGM(ox)NDEDEEGK_;_K(bi)RFPLGM(ox)NDEDEEGK_	211	NA	NA	NA	NA	NA	NA	NA	NA	NA	NA	NA	NA	NA	NA	NA	NA	NA	NA	NA
PF3D7_0202000	Plasmodium falciparum 3D7	knob-associated histidine-rich protein	KAHRP	Biotin (K)	0	1	2	KRFPLGMNDEDEEGK	_K(bi)RFPLGMNDEDEEGK_;_K(bi)RFPLGMNDEDEEGK_;_K(bi)RFPLGMNDEDEEGK_;_K(bi)RFPLGM(ox)NDEDEEGK_;_K(bi)RFPLGM(ox)NDEDEEGK_	211	NA	0.00326844	1.23225	-2.44679	NA	NA	NA	21.3185	21.1667	20.861	17.9622	18.8614	19.1823	NA	NA	NA	NA	NA	NA
PF3D7_0202000	Plasmodium falciparum 3D7	knob-associated histidine-rich protein	KAHRP	Biotin (K);Oxidation (M)	0	1	3	KRFPLGMNDEDEEGKEALAIK	_K(bi)RFPLGM(ox)NDEDEEGKEALAIK_;_K(bi)RFPLGM(ox)NDEDEEGKEALAIK_;_K(bi)RFPLGM(ox)NDEDEEGKEALAIK_;_K(bi)RFPLGM(ox)NDEDEEGKEALAIK_;_K(bi)RFPLGM(ox)NDEDEEGKEALAIK_;_K(bi)RFPLGM(ox)NDEDEEGKEALAIK_;_K(bi)RFPLGM(ox)NDEDEEGKEALAIK_;_K(bi)RFPLGM(ox)NDEDEEGKEALAIK_;_K(bi)RFPLGM(ox)NDEDEEGKEALAIK_;_K(bi)RFPLGM(ox)NDEDEEGKEALAIK_;_K(bi)RFPLGM(ox)NDEDEEGKEALAIK_;_K(bi)RFPLGM(ox)NDEDEEGKEALAIK_;_K(bi)RFPLGM(ox…	211	NA	0.183306	0.34755	-0.384296	0.639103	0.0612227	-0.124935	22.3608	23.0112	23.0096	22.4723	22.5453	22.211	25.7359	25.2084	25.2584	25.632	25.1492	25.0467
PF3D7_0202000	Plasmodium falciparum 3D7	knob-associated histidine-rich protein	KAHRP	Biotin (K)	0	1	3	KRFPLGMNDEDEEGKEALAIK	_K(bi)RFPLGM(ox)NDEDEEGKEALAIK_;_K(bi)RFPLGM(ox)NDEDEEGKEALAIK_;_K(bi)RFPLGM(ox)NDEDEEGKEALAIK_;_K(bi)RFPLGM(ox)NDEDEEGKEALAIK_;_K(bi)RFPLGM(ox)NDEDEEGKEALAIK_;_K(bi)RFPLGM(ox)NDEDEEGKEALAIK_;_K(bi)RFPLGM(ox)NDEDEEGKEALAIK_;_K(bi)RFPLGM(ox)NDEDEEGKEALAIK_;_K(bi)RFPLGM(ox)NDEDEEGKEALAIK_;_K(bi)RFPLGM(ox)NDEDEEGKEALAIK_;_K(bi)RFPLGM(ox)NDEDEEGKEALAIK_;_K(bi)RFPLGM(ox)NDEDEEGKEALAIK_;_K(bi)RFPLGM(ox…	211	NA	0.101095	0.49571	-0.419596	0.865666	0.0153866	0.0445753	24.63	24.8931	24.2778	24.1396	24.0574	24.3451	27.2181	26.6659	26.4385	26.9433	26.861	26.6519
PF3D7_0202000	Plasmodium falciparum 3D7	knob-associated histidine-rich protein	KAHRP	Biotin (K)	0	1	3	KTNEENKNKEK	_KTNEENK(bi)NKEK_;_KTNEENK(bi)NKEK_;_KTNEENK(bi)NKEK_	459	NA	NA	NA	NA	NA	NA	NA	NA	NA	NA	NA	NA	NA	NA	NA	NA	NA	NA	NA
PF3D7_0202000	Plasmodium falciparum 3D7	knob-associated histidine-rich protein	KAHRP	Biotin (K)	0	1	1	KVDSTSADNK	_K(bi)VDSTSADNK_;_K(bi)VDSTSADNK_;_K(bi)VDSTSADNK_;_K(bi)VDSTSADNK_;_K(bi)VDSTSADNK_;_K(bi)VDSTSADNK_	491	NA	0.236021	0.296322	-0.592379	NA	NA	NA	19.0112	18.8241	19.008	18.0474	17.8313	19.1875	NA	NA	NA	NA	NA	NA
PF3D7_0202000	Plasmodium falciparum 3D7	knob-associated histidine-rich protein	KAHRP	Biotin (K)	0	1	2	KVDSTSADNKSTNAATPGAK	_KVDSTSADNK(bi)STNAATPGAK_;_K(bi)VDSTSADNKSTNAATPGAK_;_KVDSTSADNK(bi)STNAATPGAK_;_KVDSTSADNK(bi)STNAATPGAK_;_KVDSTSADNK(bi)STNAATPGAK_;_KVDSTSADNK(bi)STNAATPGAK_;_KVDSTSADNK(bi)STNAATPGAK_;_KVDSTSADNK(bi)STNAATPGAK_;_KVDSTSADNK(bi)STNAATPGAK_;_K(bi)VDSTSADNKSTNAATPGAK_;_KVDSTSADNK(bi)STNAATPGAK_;_K(bi)VDSTSADNKSTNAATPGAK_;_K(bi)VDSTSADNKSTNAATPGAK_;_KVDSTSADNK(bi)STNAATPGAK_;_KVDSTSADNK(bi)STNAAT…	500;491	NA	0.14174	0.413624	-0.275592	0.979396	0.0059093	-0.00380958	24.5766	24.6461	24.8123	24.2013	24.3513	24.6556	20.2426	19.9743	20.1085	20.3038	20.1046	19.9055
PF3D7_0202000	Plasmodium falciparum 3D7	knob-associated histidine-rich protein	KAHRP	Biotin (K)	0	1	3	KVDSTSADNKSTNAATPGAKDK	_KVDSTSADNK(bi)STNAATPGAKDK_;_KVDSTSADNK(bi)STNAATPGAKDK_;_KVDSTSADNK(bi)STNAATPGAKDK_;_KVDSTSADNK(bi)STNAATPGAKDK_;_KVDSTSADNK(bi)STNAATPGAKDK_;_KVDSTSADNK(bi)STNAATPGAKDK_	500	NA	0.711539	0.0611878	0.0476411	NA	NA	NA	19.8744	20.109	19.8706	19.9599	19.8656	20.1714	NA	NA	NA	NA	NA	NA
PF3D7_0202000	Plasmodium falciparum 3D7	knob-associated histidine-rich protein	KAHRP	Biotin (K)	0	1	1	LKENVVDGK	_LK(bi)ENVVDGK_;_LK(bi)ENVVDGK_;_LK(bi)ENVVDGK_;_LK(bi)ENVVDGK_;_LK(bi)ENVVDGK_;_LK(bi)ENVVDGK_;_LK(bi)ENVVDGK_;_LK(bi)ENVVDGK_;_LK(bi)ENVVDGK_;_LK(bi)ENVVDGK_;_LK(bi)ENVVDGK_;_LK(bi)ENVVDGK_;_LK(bi)ENVVDGK_;_LK(bi)ENVVDGK_;_LK(bi)ENVVDGK_;_LK(bi)ENVVDGK_;_LK(bi)ENVVDGK_;_LK(bi)ENVVDGK_;_LK(bi)ENVVDGK_;_LK(bi)ENVVDGK_;_LK(bi)ENVVDGK_;_LK(bi)ENVVDGK_;_LK(bi)ENVVDGK_;_LK(bi)ENVVDGK_;_LK(bi)ENVVDGK_…	166	NA	0.260518	0.272596	-0.223369	0.188682	0.198254	0.253275	26.4736	26.7697	26.6436	26.1567	26.3931	26.667	28.0155	28.0031	27.8918	28.5283	28.1209	28.0211
PF3D7_0202000	Plasmodium falciparum 3D7	knob-associated histidine-rich protein	KAHRP	Biotin (K)	0	1	2	LKENVVDGKK	_LK(bi)ENVVDGKK_;_LK(bi)ENVVDGKK_;_LK(bi)ENVVDGKK_;_LK(bi)ENVVDGKK_;_LK(bi)ENVVDGKK_;_LK(bi)ENVVDGKK_;_LK(bi)ENVVDGKK_;_LK(bi)ENVVDGKK_;_LK(bi)ENVVDGKK_;_LK(bi)ENVVDGKK_;_LK(bi)ENVVDGKK_;_LK(bi)ENVVDGKK_;_LK(bi)ENVVDGKK_;_LK(bi)ENVVDGKK_;_LK(bi)ENVVDGKK_;_LK(bi)ENVVDGKK_;_LK(bi)ENVVDGKK_;_LK(bi)ENVVDGKK_;_LK(bi)ENVVDGKK_;_LK(bi)ENVVDGKK_;_LK(bi)ENVVDGKK_;_LK(bi)ENVVDGKK_;_LK(bi)ENVVDGKK_;_LK(bi)E…	166	NA	0.0951209	0.505626	-0.281612	0.283076	0.155148	1.15188	28.5352	28.5881	28.4838	28.0692	28.1985	28.4944	29.6381	29.8247	26.9549	30.0604	29.8258	29.9871
PF3D7_0202000	Plasmodium falciparum 3D7	knob-associated histidine-rich protein	KAHRP	Biotin (K)	0	1	3	LKENVVDGKKDCDEK	_LK(bi)ENVVDGKKDCDEK_;_LK(bi)ENVVDGKKDCDEK_;_LK(bi)ENVVDGKKDCDEK_;_LK(bi)ENVVDGKKDCDEK_;_LK(bi)ENVVDGKKDCDEK_;_LK(bi)ENVVDGKKDCDEK_;_LK(bi)ENVVDGKKDCDEK_;_LK(bi)ENVVDGKKDCDEK_;_LK(bi)ENVVDGKKDCDEK_;_LK(bi)ENVVDGKKDCDEK_;_LK(bi)ENVVDGKKDCDEK_;_LK(bi)ENVVDGKKDCDEK_;_LK(bi)ENVVDGKKDCDEK_;_LK(bi)ENVVDGKKDCDEK_;_LK(bi)ENVVDGKKDCDEK_;_LK(bi)ENVVDGKKDCDEK_;_LK(bi)ENVVDGKKDCDEK_;_LK(bi)ENVVDGKKDCDEK_;_LK…	166	NA	0.85707	0.0321309	0.0248544	0.20012	0.193025	0.556629	21.2076	21.1983	20.9311	21.1413	20.9751	21.2951	23.5866	23.8574	23.4208	24.4647	23.5006	24.5694
PF3D7_0202000	Plasmodium falciparum 3D7	knob-associated histidine-rich protein	KAHRP	Biotin (K)	0	1	2	NTAGENKKVDSTSADNK	_NTAGENK(bi)KVDSTSADNK_;_NTAGENK(bi)KVDSTSADNK_;_NTAGENK(bi)KVDSTSADNK_;_NTAGENK(bi)KVDSTSADNK_;_NTAGENK(bi)KVDSTSADNK_;_NTAGENK(bi)KVDSTSADNK_;_NTAGENKK(bi)VDSTSADNK_	490;491	NA	0.245805	0.287377	-0.204109	NA	NA	NA	22.9833	22.6242	22.9728	22.5379	22.5905	22.8395	NA	NA	NA	NA	NA	NA
PF3D7_0202000	Plasmodium falciparum 3D7	knob-associated histidine-rich protein	KAHRP	Biotin (K)	0	1	3	NTAGENKKVDSTSADNKSTNAATPGAK	_NTAGENK(bi)KVDSTSADNKSTNAATPGAK_;_NTAGENKK(bi)VDSTSADNKSTNAATPGAK_;_NTAGENKKVDSTSADNK(bi)STNAATPGAK_;_NTAGENK(bi)KVDSTSADNKSTNAATPGAK_;_NTAGENKK(bi)VDSTSADNKSTNAATPGAK_;_NTAGENKKVDSTSADNK(bi)STNAATPGAK_;_NTAGENKKVDSTSADNK(bi)STNAATPGAK_;_NTAGENK(bi)KVDSTSADNKSTNAATPGAK_;_NTAGENKKVDSTSADNK(bi)STNAATPGAK_;_NTAGENK(bi)KVDSTSADNKSTNAATPGAK_;_NTAGENKKVDSTSADNK(bi)STNAATPGAK_;_NTAGENK(bi)KVDSTSADNKSTN…	490;491;500	NA	0.323776	0.22277	0.211701	NA	NA	NA	24.6089	24.3819	25.0168	24.9404	24.8648	24.8375	NA	NA	NA	NA	NA	NA
PF3D7_0202000	Plasmodium falciparum 3D7	knob-associated histidine-rich protein	KAHRP	2 Biotin (K)	0	2	3	NTAGENKKVDSTSADNKSTNAATPGAK	_NTAGENK(bi)KVDSTSADNKSTNAATPGAK_;_NTAGENKK(bi)VDSTSADNKSTNAATPGAK_;_NTAGENKKVDSTSADNK(bi)STNAATPGAK_;_NTAGENK(bi)KVDSTSADNKSTNAATPGAK_;_NTAGENKK(bi)VDSTSADNKSTNAATPGAK_;_NTAGENKKVDSTSADNK(bi)STNAATPGAK_;_NTAGENKKVDSTSADNK(bi)STNAATPGAK_;_NTAGENK(bi)KVDSTSADNKSTNAATPGAK_;_NTAGENKKVDSTSADNK(bi)STNAATPGAK_;_NTAGENK(bi)KVDSTSADNKSTNAATPGAK_;_NTAGENKKVDSTSADNK(bi)STNAATPGAK_;_NTAGENK(bi)KVDSTSADNKSTN…	490;491;500	NA	0.553039	0.111908	0.0683744	NA	NA	NA	22.0161	22.2941	22.3331	22.2144	22.3054	22.3287	NA	NA	NA	NA	NA	NA
PF3D7_0202000	Plasmodium falciparum 3D7	knob-associated histidine-rich protein	KAHRP	Biotin (K)	0	1	1	PGGGFKAYEEK	_PGGGFK(bi)AYEEK_;_PGGGFK(bi)AYEEK_;_PGGGFK(bi)AYEEK_;_PGGGFK(bi)AYEEK_;_PGGGFK(bi)AYEEK_;_PGGGFK(bi)AYEEK_;_PGGGFK(bi)AYEEK_;_PGGGFK(bi)AYEEK_;_PGGGFK(bi)AYEEK_;_PGGGFK(bi)AYEEK_;_PGGGFK(bi)AYEEK_;_PGGGFK(bi)AYEEK_	152	NA	0.192805	0.340352	-0.477276	0.247225	0.167984	0.443875	20.5144	20.2249	20.8039	19.595	20.0372	20.4793	21.7341	21.0554	22.0681	22.2128	22.1866	21.7897
PF3D7_0202000	Plasmodium falciparum 3D7	knob-associated histidine-rich protein	KAHRP	Biotin (K)	0	1	2	PGGGFKAYEEKYESK	_PGGGFK(bi)AYEEKYESK_;_PGGGFK(bi)AYEEKYESK_;_PGGGFK(bi)AYEEKYESK_;_PGGGFK(bi)AYEEKYESK_;_PGGGFK(bi)AYEEKYESK_;_PGGGFK(bi)AYEEKYESK_;_PGGGFK(bi)AYEEKYESK_;_PGGGFK(bi)AYEEKYESK_;_PGGGFK(bi)AYEEKYESK_;_PGGGFK(bi)AYEEKYESK_;_PGGGFK(bi)AYEEKYESK_;_PGGGFK(bi)AYEEKYESK_;_PGGGFK(bi)AYEEKYESK_;_PGGGFK(bi)AYEEKYESK_;_PGGGFK(bi)AYEEKYESK_;_PGGGFK(bi)AYEEKYESK_	152	NA	0.0539627	0.613649	-0.285996	0.472198	0.0971098	0.202072	23.7841	23.5593	23.6056	23.4477	23.2024	23.4408	24.1509	23.6855	24.0572	24.5838	24.0191	23.897
PF3D7_0202000	Plasmodium falciparum 3D7	knob-associated histidine-rich protein	KAHRP	2 Biotin (K)	0	2	3	PGGGFKAYEEKYESKHYK	_PGGGFK(bi)AYEEKYESKHYK(bi)_;_PGGGFK(bi)AYEEKYESK(bi)HYK_;_PGGGFK(bi)AYEEKYESKHYK(bi)_;_PGGGFK(bi)AYEEKYESKHYK(bi)_;_PGGGFK(bi)AYEEKYESKHYK(bi)_;_PGGGFK(bi)AYEEKYESKHYK(bi)_;_PGGGFKAYEEKYESKHYK(bi)_;_PGGGFKAYEEKYESK(bi)HYK_;_PGGGFKAYEEKYESK(bi)HYK_	152;164;161	NA	0.715688	0.0607383	0.0822678	NA	NA	NA	21.8442	21.8399	21.3076	21.8952	21.8161	21.5272	NA	NA	NA	NA	NA	NA
PF3D7_0202000	Plasmodium falciparum 3D7	knob-associated histidine-rich protein	KAHRP	Biotin (K)	0	1	3	PGGGFKAYEEKYESKHYK	_PGGGFK(bi)AYEEKYESKHYK(bi)_;_PGGGFK(bi)AYEEKYESK(bi)HYK_;_PGGGFK(bi)AYEEKYESKHYK(bi)_;_PGGGFK(bi)AYEEKYESKHYK(bi)_;_PGGGFK(bi)AYEEKYESKHYK(bi)_;_PGGGFK(bi)AYEEKYESKHYK(bi)_;_PGGGFKAYEEKYESKHYK(bi)_;_PGGGFKAYEEKYESK(bi)HYK_;_PGGGFKAYEEKYESK(bi)HYK_	152;164;161	NA	NA	NA	NA	NA	NA	NA	NA	NA	NA	NA	NA	NA	NA	NA	NA	NA	NA	NA
PF3D7_0202000	Plasmodium falciparum 3D7	knob-associated histidine-rich protein	KAHRP	Biotin (K)	0	1	2	RFPLGMNDEDEEGKEALAIK	_RFPLGMNDEDEEGK(bi)EALAIK_;_RFPLGMNDEDEEGK(bi)EALAIK_	225	NA	NA	NA	NA	NA	NA	NA	NA	NA	NA	NA	NA	NA	NA	NA	NA	NA	NA	NA
PF3D7_0202000	Plasmodium falciparum 3D7	knob-associated histidine-rich protein	KAHRP	Biotin (K)	0	1	3	SDGSKAHEKKENETK	_SDGSK(bi)AHEKKENETK_;_SDGSK(bi)AHEKKENETK_;_SDGSK(bi)AHEKKENETK_;_SDGSK(bi)AHEKKENETK_;_SDGSK(bi)AHEKKENETK_;_SDGSK(bi)AHEKKENETK_;_SDGSK(bi)AHEKKENETK_;_SDGSK(bi)AHEKKENETK_	473	NA	0.0270334	0.75288	-2.0155	NA	NA	NA	20.4544	19.4146	19.9337	16.9163	18.5755	18.2645	NA	NA	NA	NA	NA	NA
PF3D7_0202000	Plasmodium falciparum 3D7	knob-associated histidine-rich protein	KAHRP	Biotin (K)	0	1	1	STNAATPGAKDK	_STNAATPGAKDK(bi)_;_STNAATPGAK(bi)DK_;_STNAATPGAKDK(bi)_;_STNAATPGAKDK(bi)_;_STNAATPGAKDK(bi)_;_STNAATPGAKDK(bi)_	512;510	NA	0.0793647	0.537837	-0.502262	NA	NA	NA	20.0771	19.9552	19.8454	19.072	19.5328	19.7661	NA	NA	NA	NA	NA	NA
PF3D7_0202000	Plasmodium falciparum 3D7	knob-associated histidine-rich protein	KAHRP	Biotin (K)	0	1	2	STNAATPGAKDKTQGGK	_STNAATPGAKDK(bi)TQGGK_;_STNAATPGAK(bi)DKTQGGK_;_STNAATPGAKDK(bi)TQGGK_;_STNAATPGAK(bi)DKTQGGK_;_STNAATPGAKDK(bi)TQGGK_;_STNAATPGAKDK(bi)TQGGK_;_STNAATPGAKDK(bi)TQGGK_;_STNAATPGAKDK(bi)TQGGK_;_STNAATPGAKDK(bi)TQGGK_;_STNAATPGAKDK(bi)TQGGK_;_STNAATPGAKDK(bi)TQGGK_	512;510	NA	0.0424281	0.668925	-0.652782	NA	NA	NA	21.6857	21.7398	22.2138	21.107	21.0572	21.5167	NA	NA	NA	NA	NA	NA
PF3D7_0202000	Plasmodium falciparum 3D7	knob-associated histidine-rich protein	KAHRP	2 Biotin (K)	0	2	3	STNAATPGAKDKTQGGKTDK	_STNAATPGAK(bi)DKTQGGKTDK_;_STNAATPGAK(bi)DKTQGGKTDK_;_STNAATPGAKDKTQGGKTDK(bi)_;_STNAATPGAKDK(bi)TQGGKTDK_;_STNAATPGAK(bi)DKTQGGKTDK_;_STNAATPGAKDK(bi)TQGGKTDK_;_STNAATPGAKDK(bi)TQGGKTDK_;_STNAATPGAK(bi)DKTQGGKTDK_;_STNAATPGAKDKTQGGKTDK(bi)_;_STNAATPGAKDK(bi)TQGGKTDK_;_STNAATPGAKDKTQGGKTDK(bi)_;_STNAATPGAKDK(bi)TQGGKTDK_;_STNAATPGAKDK(bi)TQGGKTDK_;_STNAATPGAK(bi)DKTQGGKTDK_;_STNAATPGAKDK(bi)TQGG…	510;520;512	NA	NA	NA	NA	NA	NA	NA	NA	NA	NA	NA	NA	NA	NA	NA	NA	NA	NA	NA
PF3D7_0202000	Plasmodium falciparum 3D7	knob-associated histidine-rich protein	KAHRP	Biotin (K)	0	1	3	STNAATPGAKDKTQGGKTDK	_STNAATPGAK(bi)DKTQGGKTDK_;_STNAATPGAK(bi)DKTQGGKTDK_;_STNAATPGAKDKTQGGKTDK(bi)_;_STNAATPGAKDK(bi)TQGGKTDK_;_STNAATPGAK(bi)DKTQGGKTDK_;_STNAATPGAKDK(bi)TQGGKTDK_;_STNAATPGAKDK(bi)TQGGKTDK_;_STNAATPGAK(bi)DKTQGGKTDK_;_STNAATPGAKDKTQGGKTDK(bi)_;_STNAATPGAKDK(bi)TQGGKTDK_;_STNAATPGAKDKTQGGKTDK(bi)_;_STNAATPGAKDK(bi)TQGGKTDK_;_STNAATPGAKDK(bi)TQGGKTDK_;_STNAATPGAK(bi)DKTQGGKTDK_;_STNAATPGAKDK(bi)TQGG…	510;520;512	NA	0.794794	0.0433571	-0.0939889	NA	NA	NA	23.3847	22.4106	23.1115	22.7491	22.6576	23.2182	NA	NA	NA	NA	NA	NA
PF3D7_0202000	Plasmodium falciparum 3D7	knob-associated histidine-rich protein	KAHRP	Biotin (K)	0	1	1	TDKTGASTNAATNK	_TDK(bi)TGASTNAATNK_;_TDK(bi)TGASTNAATNK_;_TDK(bi)TGASTNAATNK_;_TDK(bi)TGASTNAATNK_;_TDK(bi)TGASTNAATNK_;_TDK(bi)TGASTNAATNK_;_TDK(bi)TGASTNAATNK_;_TDK(bi)TGASTNAATNK_;_TDK(bi)TGASTNAATNK_;_TDK(bi)TGASTNAATNK_;_TDK(bi)TGASTNAATNK_;_TDK(bi)TGASTNAATNK_;_TDK(bi)TGASTNAATNK_;_TDK(bi)TGASTNAATNK_	520	NA	0.0961423	0.502642	-0.694289	0.226183	0.182026	0.184235	23.241	23.1642	23.1668	22.0711	22.2962	23.1218	20.5516	20.3895	20.128	20.5973	20.5542	20.4702
PF3D7_0202000	Plasmodium falciparum 3D7	knob-associated histidine-rich protein	KAHRP	Biotin (K)	0	1	2	TDKTGASTNAATNKGQCAAEGATK	_TDK(bi)TGASTNAATNKGQCAAEGATK_;_TDK(bi)TGASTNAATNKGQCAAEGATK_;_TDKTGASTNAATNK(bi)GQCAAEGATK_;_TDK(bi)TGASTNAATNKGQCAAEGATK_;_TDK(bi)TGASTNAATNKGQCAAEGATK_;_TDKTGASTNAATNK(bi)GQCAAEGATK_;_TDK(bi)TGASTNAATNKGQCAAEGATK_;_TDKTGASTNAATNK(bi)GQCAAEGATK_;_TDK(bi)TGASTNAATNKGQCAAEGATK_;_TDKTGASTNAATNK(bi)GQCAAEGATK_;_TDKTGASTNAATNK(bi)GQCAAEGATK_;_TDK(bi)TGASTNAATNKGQCAAEGATK_;_TDKTGASTNAATNK(bi)GQCAAEGA…	520;531	NA	0.0124525	0.921202	-0.540402	0.960983	0.0109965	0.0211153	26.3878	26.4267	26.5077	25.7734	25.7874	26.1402	22.7082	22.6069	22.013	22.5908	21.8168	22.9839
PF3D7_0202000	Plasmodium falciparum 3D7	knob-associated histidine-rich protein	KAHRP	2 Biotin (K)	0	2	2	TDKTGASTNAATNKGQCAAEGATK	_TDK(bi)TGASTNAATNKGQCAAEGATK_;_TDK(bi)TGASTNAATNKGQCAAEGATK_;_TDKTGASTNAATNK(bi)GQCAAEGATK_;_TDK(bi)TGASTNAATNKGQCAAEGATK_;_TDK(bi)TGASTNAATNKGQCAAEGATK_;_TDKTGASTNAATNK(bi)GQCAAEGATK_;_TDK(bi)TGASTNAATNKGQCAAEGATK_;_TDKTGASTNAATNK(bi)GQCAAEGATK_;_TDK(bi)TGASTNAATNKGQCAAEGATK_;_TDKTGASTNAATNK(bi)GQCAAEGATK_;_TDKTGASTNAATNK(bi)GQCAAEGATK_;_TDK(bi)TGASTNAATNKGQCAAEGATK_;_TDKTGASTNAATNK(bi)GQCAAEGA…	520;531	NA	0.0230963	0.774253	-0.204096	NA	NA	NA	23.0849	23.0081	23.0934	22.8488	22.7762	22.949	NA	NA	NA	NA	NA	NA
PF3D7_0202000	Plasmodium falciparum 3D7	knob-associated histidine-rich protein	KAHRP	Biotin (K)	0	1	3	TDKTGASTNAATNKGQCAAEGATKGATK	_TDKTGASTNAATNKGQCAAEGATK(bi)GATK_;_TDKTGASTNAATNKGQCAAEGATK(bi)GATK_;_TDK(bi)TGASTNAATNKGQCAAEGATKGATK_;_TDKTGASTNAATNK(bi)GQCAAEGATKGATK_;_TDKTGASTNAATNKGQCAAEGATK(bi)GATK_;_TDKTGASTNAATNKGQCAAEGATK(bi)GATK_;_TDK(bi)TGASTNAATNKGQCAAEGATKGATK_;_TDKTGASTNAATNK(bi)GQCAAEGATKGATK_;_TDKTGASTNAATNKGQCAAEGATK(bi)GATK_;_TDKTGASTNAATNKGQCAAEGATK(bi)GATK_;_TDK(bi)TGASTNAATNKGQCAAEGATKGATK_;_TDKTGASTNAATN…	541;520;531;545	NA	0.647204	0.0808896	-0.0601989	0.0832727	0.360451	0.285839	24.3596	24.402	24.6497	24.5461	24.2638	24.4208	19.8394	19.7215	19.5698	19.8281	19.9961	20.1641
PF3D7_0202000	Plasmodium falciparum 3D7	knob-associated histidine-rich protein	KAHRP	2 Biotin (K)	0	2	3	TDKTGASTNAATNKGQCAAEGATKGATK	_TDKTGASTNAATNKGQCAAEGATK(bi)GATK_;_TDKTGASTNAATNKGQCAAEGATK(bi)GATK_;_TDK(bi)TGASTNAATNKGQCAAEGATKGATK_;_TDKTGASTNAATNK(bi)GQCAAEGATKGATK_;_TDKTGASTNAATNKGQCAAEGATK(bi)GATK_;_TDKTGASTNAATNKGQCAAEGATK(bi)GATK_;_TDK(bi)TGASTNAATNKGQCAAEGATKGATK_;_TDKTGASTNAATNK(bi)GQCAAEGATKGATK_;_TDKTGASTNAATNKGQCAAEGATK(bi)GATK_;_TDKTGASTNAATNKGQCAAEGATK(bi)GATK_;_TDK(bi)TGASTNAATNKGQCAAEGATKGATK_;_TDKTGASTNAATN…	541;520;531;545	NA	0.161692	0.379405	-0.485762	NA	NA	NA	23.3596	23.021	23.186	22.1864	23.0712	22.8518	NA	NA	NA	NA	NA	NA
PF3D7_0202000	Plasmodium falciparum 3D7	knob-associated histidine-rich protein	KAHRP	Biotin (K)	0	1	1	TGASTNAATNKGQCAAEGATK	_TGASTNAATNK(bi)GQCAAEGATK_;_TGASTNAATNK(bi)GQCAAEGATK_;_TGASTNAATNK(bi)GQCAAEGATK_;_TGASTNAATNK(bi)GQCAAEGATK_;_TGASTNAATNK(bi)GQCAAEGATK_;_TGASTNAATNK(bi)GQCAAEGATK_;_TGASTNAATNK(bi)GQCAAEGATK_;_TGASTNAATNK(bi)GQCAAEGATK_;_TGASTNAATNK(bi)GQCAAEGATK_;_TGASTNAATNK(bi)GQCAAEGATK_;_TGASTNAATNK(bi)GQCAAEGATK_;_TGASTNAATNK(bi)GQCAAEGATK_;_TGASTNAATNK(bi)GQCAAEGATK_;_TGASTNAATNK(bi)GQCAAEGATK_;_TGASTN…	531	NA	0.0316179	0.721959	-0.362632	0.257604	0.166336	0.273029	27.1341	27.1815	27.2936	26.8593	26.6562	27.0058	23.5866	23.2053	22.8838	23.5226	23.5517	23.4205
PF3D7_0202000	Plasmodium falciparum 3D7	knob-associated histidine-rich protein	KAHRP	2 Biotin (K)	0	2	2	TGASTNAATNKGQCAAEGATKGATK	_TGASTNAATNKGQCAAEGATK(bi)GATK_;_TGASTNAATNKGQCAAEGATK(bi)GATK_;_TGASTNAATNK(bi)GQCAAEGATKGATK_;_TGASTNAATNKGQCAAEGATK(bi)GATK_;_TGASTNAATNKGQCAAEGATK(bi)GATK_;_TGASTNAATNK(bi)GQCAAEGATKGATK_;_TGASTNAATNKGQCAAEGATK(bi)GATK_;_TGASTNAATNKGQCAAEGATK(bi)GATK_;_TGASTNAATNKGQCAAEGATK(bi)GATK_;_TGASTNAATNKGQCAAEGATK(bi)GATK_;_TGASTNAATNK(bi)GQCAAEGATKGATK_;_TGASTNAATNKGQCAAEGATK(bi)GATK_;_TGASTNAATNKGQC…	541;531;545	NA	0.154664	0.388722	-0.223836	NA	NA	NA	24.5097	24.2771	24.6741	24.2865	24.1579	24.3451	NA	NA	NA	NA	NA	NA
PF3D7_0202000	Plasmodium falciparum 3D7	knob-associated histidine-rich protein	KAHRP	Biotin (K)	0	1	2	TGASTNAATNKGQCAAEGATKGATK	_TGASTNAATNKGQCAAEGATK(bi)GATK_;_TGASTNAATNKGQCAAEGATK(bi)GATK_;_TGASTNAATNK(bi)GQCAAEGATKGATK_;_TGASTNAATNKGQCAAEGATK(bi)GATK_;_TGASTNAATNKGQCAAEGATK(bi)GATK_;_TGASTNAATNK(bi)GQCAAEGATKGATK_;_TGASTNAATNKGQCAAEGATK(bi)GATK_;_TGASTNAATNKGQCAAEGATK(bi)GATK_;_TGASTNAATNKGQCAAEGATK(bi)GATK_;_TGASTNAATNKGQCAAEGATK(bi)GATK_;_TGASTNAATNK(bi)GQCAAEGATKGATK_;_TGASTNAATNKGQCAAEGATK(bi)GATK_;_TGASTNAATNKGQC…	541;531;545	NA	0.0927601	0.506783	-0.286806	0.31569	0.143109	0.245245	26.8821	26.5712	26.7846	26.6032	26.2862	26.488	22.0185	22.1534	21.6849	21.9903	22.0842	22.5179
PF3D7_0202000	Plasmodium falciparum 3D7	knob-associated histidine-rich protein	KAHRP	Biotin (K)	0	1	3	TGASTNAATNKGQCAAEGATKGATKEASTSK	_TGASTNAATNKGQCAAEGATK(bi)GATKEASTSK_;_TGASTNAATNKGQCAAEGATK(bi)GATKEASTSK_;_TGASTNAATNKGQCAAEGATKGATK(bi)EASTSK_;_TGASTNAATNKGQCAAEGATK(bi)GATKEASTSK_;_TGASTNAATNKGQCAAEGATK(bi)GATKEASTSK_;_TGASTNAATNKGQCAAEGATKGATK(bi)EASTSK_;_TGASTNAATNKGQCAAEGATK(bi)GATKEASTSK_;_TGASTNAATNKGQCAAEGATKGATK(bi)EASTSK_;_TGASTNAATNKGQCAAEGATK(bi)GATKEASTSK_;_TGASTNAATNKGQCAAEGATK(bi)GATKEASTSK_;_TGASTNAATNKGQCAAEG…	541;545;531	NA	0.186198	0.345844	0.591224	NA	NA	NA	22.3796	21.6148	21.8262	22.9825	22.6287	21.983	NA	NA	NA	NA	NA	NA
PF3D7_0202000	Plasmodium falciparum 3D7	knob-associated histidine-rich protein	KAHRP	2 Biotin (K)	0	2	3	TGASTNAATNKGQCAAEGATKGATKEASTSK	_TGASTNAATNKGQCAAEGATK(bi)GATKEASTSK_;_TGASTNAATNKGQCAAEGATK(bi)GATKEASTSK_;_TGASTNAATNKGQCAAEGATKGATK(bi)EASTSK_;_TGASTNAATNKGQCAAEGATK(bi)GATKEASTSK_;_TGASTNAATNKGQCAAEGATK(bi)GATKEASTSK_;_TGASTNAATNKGQCAAEGATKGATK(bi)EASTSK_;_TGASTNAATNKGQCAAEGATK(bi)GATKEASTSK_;_TGASTNAATNKGQCAAEGATKGATK(bi)EASTSK_;_TGASTNAATNKGQCAAEGATK(bi)GATKEASTSK_;_TGASTNAATNKGQCAAEGATK(bi)GATKEASTSK_;_TGASTNAATNKGQCAAEG…	541;545;531	NA	0.405937	0.172476	-0.160742	NA	NA	NA	22.7203	22.8476	22.9752	22.9437	22.7146	22.4026	NA	NA	NA	NA	NA	NA
PF3D7_0202000	Plasmodium falciparum 3D7	knob-associated histidine-rich protein	KAHRP	3 Biotin (K)	0	3	3	TGASTNAATNKGQCAAEGATKGATKEASTSK	_TGASTNAATNKGQCAAEGATK(bi)GATKEASTSK_;_TGASTNAATNKGQCAAEGATK(bi)GATKEASTSK_;_TGASTNAATNKGQCAAEGATKGATK(bi)EASTSK_;_TGASTNAATNKGQCAAEGATK(bi)GATKEASTSK_;_TGASTNAATNKGQCAAEGATK(bi)GATKEASTSK_;_TGASTNAATNKGQCAAEGATKGATK(bi)EASTSK_;_TGASTNAATNKGQCAAEGATK(bi)GATKEASTSK_;_TGASTNAATNKGQCAAEGATKGATK(bi)EASTSK_;_TGASTNAATNKGQCAAEGATK(bi)GATKEASTSK_;_TGASTNAATNKGQCAAEGATK(bi)GATKEASTSK_;_TGASTNAATNKGQCAAEG…	541;545;531	NA	NA	NA	NA	NA	NA	NA	NA	NA	NA	NA	NA	NA	NA	NA	NA	NA	NA	NA
PF3D7_0202000	Plasmodium falciparum 3D7	knob-associated histidine-rich protein	KAHRP	2 Biotin (K)	0	2	3	TNEENKNKEKTNNSK	_TNEENKNKEK(bi)TNNSK_;_TNEENKNKEK(bi)TNNSK_;_TNEENKNKEK(bi)TNNSK_;_TNEENKNKEK(bi)TNNSK_;_TNEENKNKEK(bi)TNNSK_;_TNEENK(bi)NKEK(bi)TNNSK_;_TNEENKNK(bi)EK(bi)TNNSK_	463;459;461	NA	NA	NA	NA	NA	NA	NA	NA	NA	NA	NA	NA	NA	NA	NA	NA	NA	NA	NA
PF3D7_0202000	Plasmodium falciparum 3D7	knob-associated histidine-rich protein	KAHRP	Biotin (K)	0	1	3	TNEENKNKEKTNNSK	_TNEENKNKEK(bi)TNNSK_;_TNEENKNKEK(bi)TNNSK_;_TNEENKNKEK(bi)TNNSK_;_TNEENKNKEK(bi)TNNSK_;_TNEENKNKEK(bi)TNNSK_;_TNEENK(bi)NKEK(bi)TNNSK_;_TNEENKNK(bi)EK(bi)TNNSK_	463;459;461	NA	0.514355	0.128668	-0.256854	NA	NA	NA	19.5944	18.9296	19.262	18.8745	18.5564	19.5846	NA	NA	NA	NA	NA	NA
PF3D7_0202000	Plasmodium falciparum 3D7	knob-associated histidine-rich protein	KAHRP	Biotin (K)	0	1	1	TNNSKSDGSK	_TNNSKSDGSK(bi)_;_TNNSKSDGSK(bi)_;_TNNSK(bi)SDGSK_	473;468	NA	NA	NA	NA	NA	NA	NA	NA	NA	NA	NA	NA	NA	NA	NA	NA	NA	NA	NA
PF3D7_0202000	Plasmodium falciparum 3D7	knob-associated histidine-rich protein	KAHRP	2 Biotin (K)	0	2	2	TQGGKTDKTGASTNAATNK	_TQGGK(bi)TDKTGASTNAATNK_;_TQGGKTDK(bi)TGASTNAATNK_;_TQGGK(bi)TDKTGASTNAATNK_;_TQGGKTDK(bi)TGASTNAATNK_;_TQGGK(bi)TDKTGASTNAATNK_;_TQGGKTDK(bi)TGASTNAATNK_;_TQGGKTDK(bi)TGASTNAATNK_;_TQGGK(bi)TDKTGASTNAATNK_;_TQGGKTDK(bi)TGASTNAATNK_;_TQGGK(bi)TDKTGASTNAATNK_;_TQGGKTDK(bi)TGASTNAATNK_;_TQGGKTDK(bi)TGASTNAATNK_;_TQGGKTDK(bi)TGASTNAATNK_;_TQGGKTDK(bi)TGASTNAATNK_;_TQGGKTDK(bi)TGASTNAATNK_;_TQGGKTDK…	517;520	NA	0.569848	0.105193	-0.132442	NA	NA	NA	21.5736	22.1389	22.1528	21.6945	22.0138	21.7597	NA	NA	NA	NA	NA	NA
PF3D7_0202000	Plasmodium falciparum 3D7	knob-associated histidine-rich protein	KAHRP	Biotin (K)	0	1	2	TQGGKTDKTGASTNAATNK	_TQGGK(bi)TDKTGASTNAATNK_;_TQGGKTDK(bi)TGASTNAATNK_;_TQGGK(bi)TDKTGASTNAATNK_;_TQGGKTDK(bi)TGASTNAATNK_;_TQGGK(bi)TDKTGASTNAATNK_;_TQGGKTDK(bi)TGASTNAATNK_;_TQGGKTDK(bi)TGASTNAATNK_;_TQGGK(bi)TDKTGASTNAATNK_;_TQGGKTDK(bi)TGASTNAATNK_;_TQGGK(bi)TDKTGASTNAATNK_;_TQGGKTDK(bi)TGASTNAATNK_;_TQGGKTDK(bi)TGASTNAATNK_;_TQGGKTDK(bi)TGASTNAATNK_;_TQGGKTDK(bi)TGASTNAATNK_;_TQGGKTDK(bi)TGASTNAATNK_;_TQGGKTDK…	517;520	NA	0.12648	0.441245	-0.448306	0.535242	0.078685	0.269369	23.7841	23.3409	23.6082	23.151	22.7833	23.454	19.4686	20.287	19.0275	19.6023	19.8739	20.1149
PF3D7_0202000	Plasmodium falciparum 3D7	knob-associated histidine-rich protein	KAHRP	Biotin (K)	0	1	3	TQGGKTDKTGASTNAATNKGQCAAEGATK	_TQGGK(bi)TDKTGASTNAATNKGQCAAEGATK_;_TQGGK(bi)TDKTGASTNAATNKGQCAAEGATK_;_TQGGKTDK(bi)TGASTNAATNKGQCAAEGATK_;_TQGGKTDKTGASTNAATNK(bi)GQCAAEGATK_;_TQGGKTDKTGASTNAATNK(bi)GQCAAEGATK_;_TQGGKTDK(bi)TGASTNAATNKGQCAAEGATK_;_TQGGK(bi)TDKTGASTNAATNKGQCAAEGATK_;_TQGGKTDK(bi)TGASTNAATNKGQCAAEGATK_;_TQGGKTDK(bi)TGASTNAATNKGQCAAEGATK_;_TQGGKTDKTGASTNAATNK(bi)GQCAAEGATK_;_TQGGKTDKTGASTNAATNK(bi)GQCAAEGATK_;_TQ…	517;520;531	NA	0.43687	0.159438	-0.0734889	0.626283	0.0612227	0.368626	25.5629	25.6461	25.8123	25.6859	25.5688	25.5461	19.8513	21.4168	19.0424	20.5843	20.4721	20.36
PF3D7_0202000	Plasmodium falciparum 3D7	knob-associated histidine-rich protein	KAHRP	2 Biotin (K)	0	2	3	TQGGKTDKTGASTNAATNKGQCAAEGATK	_TQGGK(bi)TDKTGASTNAATNKGQCAAEGATK_;_TQGGK(bi)TDKTGASTNAATNKGQCAAEGATK_;_TQGGKTDK(bi)TGASTNAATNKGQCAAEGATK_;_TQGGKTDKTGASTNAATNK(bi)GQCAAEGATK_;_TQGGKTDKTGASTNAATNK(bi)GQCAAEGATK_;_TQGGKTDK(bi)TGASTNAATNKGQCAAEGATK_;_TQGGK(bi)TDKTGASTNAATNKGQCAAEGATK_;_TQGGKTDK(bi)TGASTNAATNKGQCAAEGATK_;_TQGGKTDK(bi)TGASTNAATNKGQCAAEGATK_;_TQGGKTDKTGASTNAATNK(bi)GQCAAEGATK_;_TQGGKTDKTGASTNAATNK(bi)GQCAAEGATK_;_TQ…	517;520;531	NA	0.424855	0.16637	0.236604	NA	NA	NA	23.6457	23.0963	23.8485	24.045	23.6879	23.5675	NA	NA	NA	NA	NA	NA
PF3D7_0202000	Plasmodium falciparum 3D7	knob-associated histidine-rich protein	KAHRP	Biotin (K)	0	1	1	VDSTSADNKSTNAATPGAK	_VDSTSADNK(bi)STNAATPGAK_;_VDSTSADNK(bi)STNAATPGAK_;_VDSTSADNK(bi)STNAATPGAK_;_VDSTSADNK(bi)STNAATPGAK_;_VDSTSADNK(bi)STNAATPGAK_;_VDSTSADNK(bi)STNAATPGAK_;_VDSTSADNK(bi)STNAATPGAK_;_VDSTSADNK(bi)STNAATPGAK_;_VDSTSADNK(bi)STNAATPGAK_;_VDSTSADNK(bi)STNAATPGAK_;_VDSTSADNK(bi)STNAATPGAK_;_VDSTSADNK(bi)STNAATPGAK_;_VDSTSADNK(bi)STNAATPGAK_;_VDSTSADNK(bi)STNAATPGAK_;_VDSTSADNK(bi)STNAATPGAK_;_VDSTSADN…	500	NA	0.063883	0.586202	-0.423979	0.0883822	0.34205	0.678835	27.0085	27.0916	27.2265	26.4268	26.6676	26.9603	21.8879	21.8106	21.8493	21.9949	22.5493	23.04
PF3D7_0202000	Plasmodium falciparum 3D7	knob-associated histidine-rich protein	KAHRP	Biotin (K)	0	1	2	VDSTSADNKSTNAATPGAKDK	_VDSTSADNKSTNAATPGAKDK(bi)_;_VDSTSADNK(bi)STNAATPGAKDK_;_VDSTSADNKSTNAATPGAK(bi)DK_;_VDSTSADNK(bi)STNAATPGAKDK_;_VDSTSADNKSTNAATPGAKDK(bi)_;_VDSTSADNK(bi)STNAATPGAKDK_;_VDSTSADNK(bi)STNAATPGAKDK_;_VDSTSADNKSTNAATPGAK(bi)DK_;_VDSTSADNK(bi)STNAATPGAKDK_;_VDSTSADNKSTNAATPGAK(bi)DK_;_VDSTSADNK(bi)STNAATPGAKDK_;_VDSTSADNKSTNAATPGAKDK(bi)_;_VDSTSADNK(bi)STNAATPGAKDK_;_VDSTSADNK(bi)STNAATPGAKDK_;_VDSTSA…	512;500;510	NA	0.0460429	0.64891	-0.251309	NA	NA	NA	24.6663	24.4984	24.706	24.3669	24.2698	24.48	NA	NA	NA	NA	NA	NA
PF3D7_0202000	Plasmodium falciparum 3D7	knob-associated histidine-rich protein	KAHRP	Biotin (K)	0	1	3	VDSTSADNKSTNAATPGAKDKTQGGK	_VDSTSADNKSTNAATPGAK(bi)DKTQGGK_;_VDSTSADNKSTNAATPGAK(bi)DKTQGGK_;_VDSTSADNK(bi)STNAATPGAKDKTQGGK_;_VDSTSADNK(bi)STNAATPGAKDKTQGGK_;_VDSTSADNKSTNAATPGAK(bi)DKTQGGK_;_VDSTSADNKSTNAATPGAK(bi)DKTQGGK_;_VDSTSADNKSTNAATPGAK(bi)DKTQGGK_;_VDSTSADNK(bi)STNAATPGAKDKTQGGK_;_VDSTSADNKSTNAATPGAKDKTQGGK(bi)_;_VDSTSADNKSTNAATPGAK(bi)DKTQGGK_;_VDSTSADNK(bi)STNAATPGAKDKTQGGK_;_VDSTSADNKSTNAATPGAK(bi)DKTQGGK_;_VD…	510;500;517;512	NA	0.886665	0.026912	0.00882444	NA	NA	NA	23.0828	23.12	23.2682	23.1623	23.1898	23.1452	NA	NA	NA	NA	NA	NA
PF3D7_0202000	Plasmodium falciparum 3D7	knob-associated histidine-rich protein	KAHRP	Biotin (K)	0	1	1	YESKHYK	_YESK(bi)HYK_;_YESK(bi)HYK_;_YESK(bi)HYK_;_YESK(bi)HYK_;_YESK(bi)HYK_;_YESK(bi)HYK_;_YESK(bi)HYK_;_YESK(bi)HYK_;_YESK(bi)HYK_;_YESK(bi)HYK_;_YESK(bi)HYK_;_YESK(bi)HYK_;_YESK(bi)HYK_;_YESK(bi)HYK_;_YESK(bi)HYK_;_YESK(bi)HYK_;_YESK(bi)HYK_;_YESK(bi)HYK_;_YESK(bi)HYK_;_YESK(bi)HYK_;_YESK(bi)HYK_;_YESK(bi)HYK_	161	NA	0.0861133	0.519742	0.170298	0.476799	0.0964605	-0.715821	23.504	23.4086	23.6029	23.5802	23.6968	23.7495	21.813	24.5679	21.8493	22.0277	22.0848	21.9704
PF3D7_0202000	Plasmodium falciparum 3D7	knob-associated histidine-rich protein	KAHRP	Biotin (K)	0	1	2	YESKHYKLK	_YESKHYK(bi)LK_;_YESKHYK(bi)LK_;_YESKHYK(bi)LK_;_YESKHYK(bi)LK_;_YESKHYK(bi)LK_;_YESKHYK(bi)LK_	164	NA	0.168221	0.368694	0.545348	NA	NA	NA	19.1042	19.3079	19.8978	19.6671	20.4074	19.8715	NA	NA	NA	NA	NA	NA
PF3D7_0202000	Plasmodium falciparum 3D7	knob-associated histidine-rich protein	KAHRP	Biotin (K)	0	1	1	YGKHGDEK	_YGK(bi)HGDEK_;_YGK(bi)HGDEK_;_YGK(bi)HGDEK_;_YGK(bi)HGDEK_;_YGK(bi)HGDEK_;_YGK(bi)HGDEK_;_YGK(bi)HGDEK_;_YGK(bi)HGDEK_;_YGK(bi)HGDEK_;_YGK(bi)HGDEK_;_YGK(bi)HGDEK_;_YGK(bi)HGDEK_;_YGK(bi)HGDEK_;_YGK(bi)HGDEK_;_YGK(bi)HGDEK_;_YGK(bi)HGDEK_;_YGK(bi)HGDEK_;_YGK(bi)HGDEK_;_YGK(bi)HGDEK_;_YGK(bi)HGDEK_;_YGK(bi)HGDEK_;_YGK(bi)HGDEK_;_YGK(bi)HGDEK_	354	NA	0.147689	0.402816	-1.83901	0.360483	0.133818	1.19513	24.2341	23.0249	23.1471	20.2488	23.455	21.1853	19.392	22.2281	21.8818	23.1922	23.0035	20.8915
PF3D7_0202000	Plasmodium falciparum 3D7	knob-associated histidine-rich protein	KAHRP	2 Biotin (K)	0	2	2	YGKHGDEKHHSSK	_YGK(bi)HGDEKHHSSK_;_YGK(bi)HGDEKHHSSK_;_YGK(bi)HGDEKHHSSK_;_YGK(bi)HGDEKHHSSK_;_YGK(bi)HGDEKHHSSK_;_YGK(bi)HGDEKHHSSK_;_YGK(bi)HGDEKHHSSK_;_YGK(bi)HGDEKHHSSK_;_YGK(bi)HGDEKHHSSK_;_YGK(bi)HGDEKHHSSK_;_YGK(bi)HGDEKHHSSK_;_YGK(bi)HGDEKHHSSK_;_YGK(bi)HGDEKHHSSK_;_YGK(bi)HGDEKHHSSK_;_YGK(bi)HGDEKHHSSK_;_YGK(bi)HGDEK(bi)HHSSK_;_YGK(bi)HGDEK(bi)HHSSK_;_YGK(bi)HGDEK(bi)HHSSK_;_YGK(bi)HGDEK(bi)HHSSK_	354;359	NA	0.156315	0.387804	-1.86262	NA	NA	NA	18.4473	22.1273	20.2873	18.4247	18.6271	18.2223	NA	NA	NA	NA	NA	NA
PF3D7_0202000	Plasmodium falciparum 3D7	knob-associated histidine-rich protein	KAHRP	Biotin (K)	0	1	2	YGKHGDEKHHSSK	_YGK(bi)HGDEKHHSSK_;_YGK(bi)HGDEKHHSSK_;_YGK(bi)HGDEKHHSSK_;_YGK(bi)HGDEKHHSSK_;_YGK(bi)HGDEKHHSSK_;_YGK(bi)HGDEKHHSSK_;_YGK(bi)HGDEKHHSSK_;_YGK(bi)HGDEKHHSSK_;_YGK(bi)HGDEKHHSSK_;_YGK(bi)HGDEKHHSSK_;_YGK(bi)HGDEKHHSSK_;_YGK(bi)HGDEKHHSSK_;_YGK(bi)HGDEKHHSSK_;_YGK(bi)HGDEKHHSSK_;_YGK(bi)HGDEKHHSSK_;_YGK(bi)HGDEK(bi)HHSSK_;_YGK(bi)HGDEK(bi)HHSSK_;_YGK(bi)HGDEK(bi)HHSSK_;_YGK(bi)HGDEK(bi)HHSSK_	354;359	NA	0.391326	0.179984	-1.88959	0.0116396	0.771577	1.57787	23.7651	23.6404	23.8231	23.0931	17.9998	24.4671	18.6668	19.2848	18.0488	20.2629	20.184	20.2871
PF3D7_0202000	Plasmodium falciparum 3D7	knob-associated histidine-rich protein	KAHRP	Biotin (K)	0	1	1	YSSFSSVNKYGK	_YSSFSSVNK(bi)YGK_;_YSSFSSVNK(bi)YGK_;_YSSFSSVNK(bi)YGK_;_YSSFSSVNK(bi)YGK_;_YSSFSSVNK(bi)YGK_;_YSSFSSVNK(bi)YGK_;_YSSFSSVNK(bi)YGK_;_YSSFSSVNK(bi)YGK_;_YSSFSSVNKYGK(bi)_;_YSSFSSVNK(bi)YGK_;_YSSFSSVNK(bi)YGK_;_YSSFSSVNK(bi)YGK_;_YSSFSSVNK(bi)YGK_;_YSSFSSVNK(bi)YGK_;_YSSFSSVNK(bi)YGK_;_YSSFSSVNKYGK(bi)_;_YSSFSSVNK(bi)YGK_;_YSSFSSVNK(bi)YGK_;_YSSFSSVNK(bi)YGK_;_YSSFSSVNK(bi)YGK_;_YSSFSSVNK(bi)YGK_;…	351;354	NA	0.00805601	1.00735	0.732838	0.00909674	0.841362	2.47353	27.719	27.7106	27.8431	28.7511	28.4635	28.2567	25.7021	26.2309	24.8447	28.6951	27.5673	27.9359
PF3D7_0202000	Plasmodium falciparum 3D7	knob-associated histidine-rich protein	KAHRP	Biotin (K);Phospho (STY)	1	1	1	YSSFSSVNKYGK	_YSSFSSVNK(bi)YGK_;_YSSFSSVNK(bi)YGK_;_YSSFSSVNK(bi)YGK_;_YSSFSSVNK(bi)YGK_;_YSSFSSVNK(bi)YGK_;_YSSFSSVNK(bi)YGK_;_YSSFSSVNK(bi)YGK_;_YSSFSSVNK(bi)YGK_;_YSSFSSVNKYGK(bi)_;_YSSFSSVNK(bi)YGK_;_YSSFSSVNK(bi)YGK_;_YSSFSSVNK(bi)YGK_;_YSSFSSVNK(bi)YGK_;_YSSFSSVNK(bi)YGK_;_YSSFSSVNK(bi)YGK_;_YSSFSSVNKYGK(bi)_;_YSSFSSVNK(bi)YGK_;_YSSFSSVNK(bi)YGK_;_YSSFSSVNK(bi)YGK_;_YSSFSSVNK(bi)YGK_;_YSSFSSVNK(bi)YGK_;…	351;354	345	0.036442	0.688744	-3.17796	0.00274281	1.03564	-2.53197	22.3511	22.7791	23.5613	19.4601	18.1939	21.5037	21.4949	21.1641	21.0699	17.9926	19.1457	18.9946
PF3D7_0202000	Plasmodium falciparum 3D7	knob-associated histidine-rich protein	KAHRP	2 Phospho (STY);Biotin (K)	2	1	2	YSSFSSVNKYGKHGDEK	_YSSFSSVNKYGK(bi)HGDEK_;_YSSFSSVNKYGK(bi)HGDEK_;_YSSFSSVNKYGK(bi)HGDEK_;_YSSFSSVNKYGK(bi)HGDEK_;_YSSFSSVNKYGK(bi)HGDEK_;_YSSFSSVNKYGK(bi)HGDEK_;_YSSFSSVNKYGK(bi)HGDEK_;_YSSFSSVNKYGK(bi)HGDEK_;_YSSFSSVNKYGK(bi)HGDEK_;_YSSFSSVNKYGK(bi)HGDEK_;_YSSFSSVNKYGK(bi)HGDEK_;_YSSFSSVNKYGK(bi)HGDEK_;_YSSFSSVNKYGK(bi)HGDEK_;_YSSFSSVNKYGK(bi)HGDEK_;_YSSFSSVNKYGK(bi)HGDEK_;_YSSFSSVNKYGK(bi)HGDEK_;_YSSFSSVNKYGK(b…	354;351	345;347;343	0.00577228	1.0914	-3.31254	NA	NA	NA	22.3397	22.1209	21.6992	19.5352	19.0907	17.5963	NA	NA	NA	NA	NA	NA
PF3D7_0202000	Plasmodium falciparum 3D7	knob-associated histidine-rich protein	KAHRP	2 Biotin (K)	0	2	2	YSSFSSVNKYGKHGDEK	_YSSFSSVNKYGK(bi)HGDEK_;_YSSFSSVNKYGK(bi)HGDEK_;_YSSFSSVNKYGK(bi)HGDEK_;_YSSFSSVNKYGK(bi)HGDEK_;_YSSFSSVNKYGK(bi)HGDEK_;_YSSFSSVNKYGK(bi)HGDEK_;_YSSFSSVNKYGK(bi)HGDEK_;_YSSFSSVNKYGK(bi)HGDEK_;_YSSFSSVNKYGK(bi)HGDEK_;_YSSFSSVNKYGK(bi)HGDEK_;_YSSFSSVNKYGK(bi)HGDEK_;_YSSFSSVNKYGK(bi)HGDEK_;_YSSFSSVNKYGK(bi)HGDEK_;_YSSFSSVNKYGK(bi)HGDEK_;_YSSFSSVNKYGK(bi)HGDEK_;_YSSFSSVNKYGK(bi)HGDEK_;_YSSFSSVNKYGK(b…	354;351	NA	0.0847952	0.523817	0.655138	NA	NA	NA	25.5684	24.8693	24.7139	25.766	25.4811	25.8699	NA	NA	NA	NA	NA	NA
PF3D7_0202000	Plasmodium falciparum 3D7	knob-associated histidine-rich protein	KAHRP	Biotin (K)	0	1	2	YSSFSSVNKYGKHGDEK	_YSSFSSVNKYGK(bi)HGDEK_;_YSSFSSVNKYGK(bi)HGDEK_;_YSSFSSVNKYGK(bi)HGDEK_;_YSSFSSVNKYGK(bi)HGDEK_;_YSSFSSVNKYGK(bi)HGDEK_;_YSSFSSVNKYGK(bi)HGDEK_;_YSSFSSVNKYGK(bi)HGDEK_;_YSSFSSVNKYGK(bi)HGDEK_;_YSSFSSVNKYGK(bi)HGDEK_;_YSSFSSVNKYGK(bi)HGDEK_;_YSSFSSVNKYGK(bi)HGDEK_;_YSSFSSVNKYGK(bi)HGDEK_;_YSSFSSVNKYGK(bi)HGDEK_;_YSSFSSVNKYGK(bi)HGDEK_;_YSSFSSVNKYGK(bi)HGDEK_;_YSSFSSVNKYGK(bi)HGDEK_;_YSSFSSVNKYGK(b…	354;351	NA	0.104563	0.49141	0.391114	0.00919405	0.841362	3.10205	25.5629	25.2807	25.3801	25.9745	25.9587	25.4638	18.772	19.5318	20.8108	22.9095	22.2781	23.2332
PF3D7_0202000	Plasmodium falciparum 3D7	knob-associated histidine-rich protein	KAHRP	Biotin (K);Phospho (STY)	1	1	2	YSSFSSVNKYGKHGDEK	_YSSFSSVNKYGK(bi)HGDEK_;_YSSFSSVNKYGK(bi)HGDEK_;_YSSFSSVNKYGK(bi)HGDEK_;_YSSFSSVNKYGK(bi)HGDEK_;_YSSFSSVNKYGK(bi)HGDEK_;_YSSFSSVNKYGK(bi)HGDEK_;_YSSFSSVNKYGK(bi)HGDEK_;_YSSFSSVNKYGK(bi)HGDEK_;_YSSFSSVNKYGK(bi)HGDEK_;_YSSFSSVNKYGK(bi)HGDEK_;_YSSFSSVNKYGK(bi)HGDEK_;_YSSFSSVNKYGK(bi)HGDEK_;_YSSFSSVNKYGK(bi)HGDEK_;_YSSFSSVNKYGK(bi)HGDEK_;_YSSFSSVNKYGK(bi)HGDEK_;_YSSFSSVNKYGK(bi)HGDEK_;_YSSFSSVNKYGK(b…	354;351	345;347;343	0.000305823	1.73075	-5.05339	NA	NA	NA	24.0659	23.4984	23.3957	18.8795	17.8508	19.0696	NA	NA	NA	NA	NA	NA
PF3D7_0202000	Plasmodium falciparum 3D7	knob-associated histidine-rich protein	KAHRP	2 Biotin (K);Phospho (STY)	1	2	2	YSSFSSVNKYGKHGDEK	_YSSFSSVNKYGK(bi)HGDEK_;_YSSFSSVNKYGK(bi)HGDEK_;_YSSFSSVNKYGK(bi)HGDEK_;_YSSFSSVNKYGK(bi)HGDEK_;_YSSFSSVNKYGK(bi)HGDEK_;_YSSFSSVNKYGK(bi)HGDEK_;_YSSFSSVNKYGK(bi)HGDEK_;_YSSFSSVNKYGK(bi)HGDEK_;_YSSFSSVNKYGK(bi)HGDEK_;_YSSFSSVNKYGK(bi)HGDEK_;_YSSFSSVNKYGK(bi)HGDEK_;_YSSFSSVNKYGK(bi)HGDEK_;_YSSFSSVNKYGK(bi)HGDEK_;_YSSFSSVNKYGK(bi)HGDEK_;_YSSFSSVNKYGK(bi)HGDEK_;_YSSFSSVNKYGK(bi)HGDEK_;_YSSFSSVNKYGK(b…	354;351	345;347;343	NA	NA	NA	NA	NA	NA	NA	NA	NA	NA	NA	NA	NA	NA	NA	NA	NA	NA
PF3D7_0202000	Plasmodium falciparum 3D7	knob-associated histidine-rich protein	KAHRP	Biotin (K)	0	1	3	YSSFSSVNKYGKHGDEKHHSSK	_YSSFSSVNKYGK(bi)HGDEKHHSSK_;_YSSFSSVNKYGK(bi)HGDEKHHSSK_;_YSSFSSVNKYGK(bi)HGDEKHHSSK_;_YSSFSSVNKYGK(bi)HGDEKHHSSK_;_YSSFSSVNKYGK(bi)HGDEKHHSSK_;_YSSFSSVNKYGK(bi)HGDEKHHSSK_;_YSSFSSVNKYGK(bi)HGDEKHHSSK_;_YSSFSSVNKYGK(bi)HGDEKHHSSK_;_YSSFSSVNKYGK(bi)HGDEKHHSSK_;_YSSFSSVNKYGKHGDEK(bi)HHSSK_;_YSSFSSVNKYGK(bi)HGDEKHHSSK_;_YSSFSSVNKYGK(bi)HGDEKHHSSK_;_YSSFSSVNKYGK(bi)HGDEKHHSSK_;_YSSFSSVNKYGK(bi)HGDEK…	354;359;351;364	NA	0.00533658	1.10311	0.976791	0.0373687	0.52409	1.22769	26.5069	26.6206	26.6801	27.8241	27.6619	27.252	22.1199	22.6582	22.0155	23.5563	22.8616	24.0589
PF3D7_0202000	Plasmodium falciparum 3D7	knob-associated histidine-rich protein	KAHRP	2 Biotin (K)	0	2	3	YSSFSSVNKYGKHGDEKHHSSK	_YSSFSSVNKYGK(bi)HGDEKHHSSK_;_YSSFSSVNKYGK(bi)HGDEKHHSSK_;_YSSFSSVNKYGK(bi)HGDEKHHSSK_;_YSSFSSVNKYGK(bi)HGDEKHHSSK_;_YSSFSSVNKYGK(bi)HGDEKHHSSK_;_YSSFSSVNKYGK(bi)HGDEKHHSSK_;_YSSFSSVNKYGK(bi)HGDEKHHSSK_;_YSSFSSVNKYGK(bi)HGDEKHHSSK_;_YSSFSSVNKYGK(bi)HGDEKHHSSK_;_YSSFSSVNKYGKHGDEK(bi)HHSSK_;_YSSFSSVNKYGK(bi)HGDEKHHSSK_;_YSSFSSVNKYGK(bi)HGDEKHHSSK_;_YSSFSSVNKYGK(bi)HGDEKHHSSK_;_YSSFSSVNKYGK(bi)HGDEK…	354;359;351;364	NA	0.00225612	1.26155	1.1748	NA	NA	NA	27.5211	27.5771	27.1387	28.7464	28.6067	28.4082	NA	NA	NA	NA	NA	NA
PF3D7_0202000	Plasmodium falciparum 3D7	knob-associated histidine-rich protein	KAHRP	3 Biotin (K)	0	3	3	YSSFSSVNKYGKHGDEKHHSSK	_YSSFSSVNKYGK(bi)HGDEKHHSSK_;_YSSFSSVNKYGK(bi)HGDEKHHSSK_;_YSSFSSVNKYGK(bi)HGDEKHHSSK_;_YSSFSSVNKYGK(bi)HGDEKHHSSK_;_YSSFSSVNKYGK(bi)HGDEKHHSSK_;_YSSFSSVNKYGK(bi)HGDEKHHSSK_;_YSSFSSVNKYGK(bi)HGDEKHHSSK_;_YSSFSSVNKYGK(bi)HGDEKHHSSK_;_YSSFSSVNKYGK(bi)HGDEKHHSSK_;_YSSFSSVNKYGKHGDEK(bi)HHSSK_;_YSSFSSVNKYGK(bi)HGDEKHHSSK_;_YSSFSSVNKYGK(bi)HGDEKHHSSK_;_YSSFSSVNKYGK(bi)HGDEKHHSSK_;_YSSFSSVNKYGK(bi)HGDEK…	354;359;351;364	NA	0.130352	0.435558	1.0941	NA	NA	NA	23.3971	22.8531	21.55	23.6053	24.0364	23.4408	NA	NA	NA	NA	NA	NA
PF3D7_0202000	Plasmodium falciparum 3D7	knob-associated histidine-rich protein	KAHRP	2 Biotin (K);2 Phospho (STY)	2	2	3	YSSFSSVNKYGKHGDEKHHSSK	_YSSFSSVNKYGK(bi)HGDEKHHSSK_;_YSSFSSVNKYGK(bi)HGDEKHHSSK_;_YSSFSSVNKYGK(bi)HGDEKHHSSK_;_YSSFSSVNKYGK(bi)HGDEKHHSSK_;_YSSFSSVNKYGK(bi)HGDEKHHSSK_;_YSSFSSVNKYGK(bi)HGDEKHHSSK_;_YSSFSSVNKYGK(bi)HGDEKHHSSK_;_YSSFSSVNKYGK(bi)HGDEKHHSSK_;_YSSFSSVNKYGK(bi)HGDEKHHSSK_;_YSSFSSVNKYGKHGDEK(bi)HHSSK_;_YSSFSSVNKYGK(bi)HGDEKHHSSK_;_YSSFSSVNKYGK(bi)HGDEKHHSSK_;_YSSFSSVNKYGK(bi)HGDEKHHSSK_;_YSSFSSVNKYGK(bi)HGDEK…	354;359;351;364	345;347;348	0.00015868	1.73075	-3.55512	NA	NA	NA	21.6132	21.5622	21.747	18.4661	18.1796	17.6113	NA	NA	NA	NA	NA	NA
PF3D7_0202000	Plasmodium falciparum 3D7	knob-associated histidine-rich protein	KAHRP	Biotin (K);Phospho (STY)	1	1	3	YSSFSSVNKYGKHGDEKHHSSK	_YSSFSSVNKYGK(bi)HGDEKHHSSK_;_YSSFSSVNKYGK(bi)HGDEKHHSSK_;_YSSFSSVNKYGK(bi)HGDEKHHSSK_;_YSSFSSVNKYGK(bi)HGDEKHHSSK_;_YSSFSSVNKYGK(bi)HGDEKHHSSK_;_YSSFSSVNKYGK(bi)HGDEKHHSSK_;_YSSFSSVNKYGK(bi)HGDEKHHSSK_;_YSSFSSVNKYGK(bi)HGDEKHHSSK_;_YSSFSSVNKYGK(bi)HGDEKHHSSK_;_YSSFSSVNKYGKHGDEK(bi)HHSSK_;_YSSFSSVNKYGK(bi)HGDEKHHSSK_;_YSSFSSVNKYGK(bi)HGDEKHHSSK_;_YSSFSSVNKYGK(bi)HGDEKHHSSK_;_YSSFSSVNKYGK(bi)HGDEK…	354;359;351;364	345;347;348	6.41061e-05	1.73075	-3.00225	NA	NA	NA	24.8168	24.7011	24.7217	22.082	21.5722	21.5786	NA	NA	NA	NA	NA	NA
PF3D7_0202000	Plasmodium falciparum 3D7	knob-associated histidine-rich protein	KAHRP	2 Phospho (STY);Biotin (K)	2	1	3	YSSFSSVNKYGKHGDEKHHSSK	_YSSFSSVNKYGK(bi)HGDEKHHSSK_;_YSSFSSVNKYGK(bi)HGDEKHHSSK_;_YSSFSSVNKYGK(bi)HGDEKHHSSK_;_YSSFSSVNKYGK(bi)HGDEKHHSSK_;_YSSFSSVNKYGK(bi)HGDEKHHSSK_;_YSSFSSVNKYGK(bi)HGDEKHHSSK_;_YSSFSSVNKYGK(bi)HGDEKHHSSK_;_YSSFSSVNKYGK(bi)HGDEKHHSSK_;_YSSFSSVNKYGK(bi)HGDEKHHSSK_;_YSSFSSVNKYGKHGDEK(bi)HHSSK_;_YSSFSSVNKYGK(bi)HGDEKHHSSK_;_YSSFSSVNKYGK(bi)HGDEKHHSSK_;_YSSFSSVNKYGK(bi)HGDEKHHSSK_;_YSSFSSVNKYGK(bi)HGDEK…	354;359;351;364	345;347;348	0.00150303	1.33649	-3.2113	0.00515145	0.943468	-3.32329	24.6612	24.4478	24.4095	21.2948	20.5888	22.0008	22.7971	22.878	22.0886	19.6044	19.9891	18.2004
PF3D7_0202000	Plasmodium falciparum 3D7	knob-associated histidine-rich protein	KAHRP	2 Biotin (K);Phospho (STY)	1	2	3	YSSFSSVNKYGKHGDEKHHSSK	_YSSFSSVNKYGK(bi)HGDEKHHSSK_;_YSSFSSVNKYGK(bi)HGDEKHHSSK_;_YSSFSSVNKYGK(bi)HGDEKHHSSK_;_YSSFSSVNKYGK(bi)HGDEKHHSSK_;_YSSFSSVNKYGK(bi)HGDEKHHSSK_;_YSSFSSVNKYGK(bi)HGDEKHHSSK_;_YSSFSSVNKYGK(bi)HGDEKHHSSK_;_YSSFSSVNKYGK(bi)HGDEKHHSSK_;_YSSFSSVNKYGK(bi)HGDEKHHSSK_;_YSSFSSVNKYGKHGDEK(bi)HHSSK_;_YSSFSSVNKYGK(bi)HGDEKHHSSK_;_YSSFSSVNKYGK(bi)HGDEKHHSSK_;_YSSFSSVNKYGK(bi)HGDEKHHSSK_;_YSSFSSVNKYGK(bi)HGDEK…	354;359;351;364	345;347;348	0.00235703	1.26017	-2.84665	NA	NA	NA	25.0424	24.7594	24.5301	22.704	21.5814	21.5066	NA	NA	NA	NA	NA	NA
PF3D7_0202100	Plasmodium falciparum 3D7	liver stage associated protein 2	LSAP2	Biotin (K)	0	1	1	GSGSEKNVYLSNK	_GSGSEK(bi)NVYLSNK_;_GSGSEK(bi)NVYLSNK_;_GSGSEK(bi)NVYLSNK_;_GSGSEK(bi)NVYLSNK_;_GSGSEK(bi)NVYLSNK_;_GSGSEK(bi)NVYLSNK_;_GSGSEK(bi)NVYLSNK_;_GSGSEK(bi)NVYLSNK_;_GSGSEK(bi)NVYLSNK_;_GSGSEK(bi)NVYLSNK_;_GSGSEK(bi)NVYLSNK_;_GSGSEK(bi)NVYLSNK_;_GSGSEK(bi)NVYLSNK_;_GSGSEK(bi)NVYLSNK_;_GSGSEK(bi)NVYLSNK_;_GSGSEK(bi)NVYLSNK_;_GSGSEK(bi)NVYLSNK_;_GSGSEK(bi)NVYLSNK_;_GSGSEK(bi)NVYLSNK_	98	NA	0.103936	0.492096	-0.0790922	0.446625	0.104336	0.106975	24.4276	24.3478	24.4095	24.2865	24.3738	24.2873	23.0515	23.1179	23.1719	23.4647	23.0934	23.1041
PF3D7_0202400	Plasmodium falciparum 3D7	translation-enhancing factor	PTEF	Biotin (K)	0	1	2	EKNIQQLVKDVQLIK	_EKNIQQLVK(bi)DVQLIK_;_EKNIQQLVK(bi)DVQLIK_;_EKNIQQLVK(bi)DVQLIK_	360	NA	NA	NA	NA	NA	NA	NA	NA	NA	NA	NA	NA	NA	NA	NA	NA	NA	NA	NA
PF3D7_0202400	Plasmodium falciparum 3D7	translation-enhancing factor	PTEF	Biotin (K)	0	1	1	EQPYNNVPYILKK	_EQPYNNVPYILK(bi)K_;_EQPYNNVPYILK(bi)K_	842	NA	NA	NA	NA	NA	NA	NA	NA	NA	NA	NA	NA	NA	NA	NA	NA	NA	NA	NA
PF3D7_0202400	Plasmodium falciparum 3D7	translation-enhancing factor	PTEF	2 Biotin (K)	0	2	2	EQPYNNVPYILKKGLEPK	_EQPYNNVPYILK(bi)K(bi)GLEPK_;_EQPYNNVPYILK(bi)K(bi)GLEPK_;_EQPYNNVPYILK(bi)K(bi)GLEPK_	842;843	NA	NA	NA	NA	NA	NA	NA	NA	NA	NA	NA	NA	NA	NA	NA	NA	NA	NA	NA
PF3D7_0202400	Plasmodium falciparum 3D7	translation-enhancing factor	PTEF	Biotin (K)	0	1	1	GGIEKTDTTNIADIK	_GGIEK(bi)TDTTNIADIK_;_GGIEK(bi)TDTTNIADIK_;_GGIEK(bi)TDTTNIADIK_;_GGIEK(bi)TDTTNIADIK_;_GGIEK(bi)TDTTNIADIK_;_GGIEK(bi)TDTTNIADIK_;_GGIEK(bi)TDTTNIADIK_	329	NA	0.859639	0.0316334	-0.0774456	NA	NA	NA	23.1706	22.0677	22.0495	22.6576	22.3534	22.0445	NA	NA	NA	NA	NA	NA
PF3D7_0202400	Plasmodium falciparum 3D7	translation-enhancing factor	PTEF	Biotin (K)	0	1	1	IEILDDNGKELK	_IEILDDNGK(bi)ELK_	312	NA	NA	NA	NA	NA	NA	NA	NA	NA	NA	NA	NA	NA	NA	NA	NA	NA	NA	NA
PF3D7_0202400	Plasmodium falciparum 3D7	translation-enhancing factor	PTEF	Biotin (K)	0	1	3	NIKEEKGGIEKTDTTNIADIK	_NIKEEKGGIEK(bi)TDTTNIADIK_;_NIK(bi)EEKGGIEKTDTTNIADIK_;_NIKEEKGGIEK(bi)TDTTNIADIK_;_NIKEEKGGIEK(bi)TDTTNIADIK_	329;321	NA	NA	NA	NA	NA	NA	NA	NA	NA	NA	NA	NA	NA	NA	NA	NA	NA	NA	NA
PF3D7_0202400	Plasmodium falciparum 3D7	translation-enhancing factor	PTEF	Biotin (K)	0	1	1	NIQQLVKDVQLIK	_NIQQLVK(bi)DVQLIK_;_NIQQLVK(bi)DVQLIK_;_NIQQLVK(bi)DVQLIK_;_NIQQLVK(bi)DVQLIK_;_NIQQLVK(bi)DVQLIK_;_NIQQLVK(bi)DVQLIK_;_NIQQLVK(bi)DVQLIK_;_NIQQLVK(bi)DVQLIK_;_NIQQLVK(bi)DVQLIK_;_NIQQLVK(bi)DVQLIK_;_NIQQLVK(bi)DVQLIK_;_NIQQLVK(bi)DVQLIK_;_NIQQLVK(bi)DVQLIK_;_NIQQLVK(bi)DVQLIK_;_NIQQLVK(bi)DVQLIK_;_NIQQLVK(bi)DVQLIK_;_NIQQLVK(bi)DVQLIK_;_NIQQLVK(bi)DVQLIK_;_NIQQLVK(bi)DVQLIK_;_NIQQLVK(bi)DVQLIK_…	360	NA	0.0156431	0.859924	-0.504692	0.0398448	0.50798	-0.486031	23.7066	23.8303	23.4118	23.1736	23.1383	23.1228	22.7713	22.9829	22.8859	22.2411	22.6938	22.2472
PF3D7_0202400	Plasmodium falciparum 3D7	translation-enhancing factor	PTEF	Biotin (K)	0	1	1	QIEHVYNNSPEKPAR	_QIEHVYNNSPEK(bi)PAR_;_QIEHVYNNSPEK(bi)PAR_;_QIEHVYNNSPEK(bi)PAR_	977	NA	NA	NA	NA	NA	NA	NA	NA	NA	NA	NA	NA	NA	NA	NA	NA	NA	NA	NA
PF3D7_0202400	Plasmodium falciparum 3D7	translation-enhancing factor	PTEF	Biotin (K)	0	1	1	TNNFPSTLNEKFPHK	_TNNFPSTLNEK(bi)FPHK_;_TNNFPSTLNEK(bi)FPHK_;_TNNFPSTLNEK(bi)FPHK_;_TNNFPSTLNEKFPHK(bi)_;_TNNFPSTLNEK(bi)FPHK_;_TNNFPSTLNEKFPHK(bi)_;_TNNFPSTLNEK(bi)FPHK_;_TNNFPSTLNEK(bi)FPHK_;_TNNFPSTLNEK(bi)FPHK_;_TNNFPSTLNEK(bi)FPHK_;_TNNFPSTLNEK(bi)FPHK_;_TNNFPSTLNEK(bi)FPHK_	92;96	NA	NA	NA	NA	0.146395	0.247316	1.64292	NA	NA	NA	NA	NA	NA	17.6381	20.6921	19.3548	20.7401	21.3179	20.5558
PF3D7_0203100	Plasmodium falciparum 3D7	protein kinase, putative	N/A	2 Oxidation (M);Biotin (K)	0	1	3	KDMEKEMEKEMEK	_KDM(ox)EKEM(ox)EK(bi)EMEK_;_KDM(ox)EKEMEKEM(ox)EK(bi)_;_KDM(ox)EKEM(ox)EK(bi)EMEK_;_KDM(ox)EKEM(ox)EK(bi)EMEK_	1078;1082	NA	NA	NA	NA	0.00735236	0.864587	-0.573422	NA	NA	NA	NA	NA	NA	21.9999	22.3206	22.1603	21.5868	21.7023	21.4714
PF3D7_0207600	Plasmodium falciparum 3D7	serine repeat antigen 5	SERA5	Biotin (K)	0	1	2	ASPEFYHNLYFKNFNVGKK	_ASPEFYHNLYFK(bi)NFNVGKK_;_ASPEFYHNLYFK(bi)NFNVGKK_;_ASPEFYHNLYFK(bi)NFNVGKK_;_ASPEFYHNLYFK(bi)NFNVGKK_	855	NA	NA	NA	NA	NA	NA	NA	NA	NA	NA	NA	NA	NA	NA	NA	NA	NA	NA	NA
PF3D7_0209000	Plasmodium falciparum 3D7	6-cysteine protein P230	P230	2 Biotin (K)	0	2	2	YALLLDDEERQKK	_YALLLDDEERQK(bi)K(bi)_;_YALLLDDEERQK(bi)K(bi)_	2408;2409	NA	NA	NA	NA	NA	NA	NA	NA	NA	NA	NA	NA	NA	NA	NA	NA	NA	NA	NA
PF3D7_0219700	Plasmodium falciparum 3D7	Plasmodium exported protein (PHISTc), unknown function	GEXP20	Biotin (K)	0	1	1	WNTILQGNIIKGT	_WNTILQGNIIK(bi)GT_;_WNTILQGNIIK(bi)GT_;_WNTILQGNIIK(bi)GT_;_WNTILQGNIIK(bi)GT_	293	NA	NA	NA	NA	NA	NA	NA	NA	NA	NA	NA	NA	NA	NA	NA	NA	NA	NA	NA
PF3D7_0220100	Plasmodium falciparum 3D7	DnaJ protein, putative	N/A	Biotin (K)	0	1	1	KNLVESQIVGK	_K(bi)NLVESQIVGK_;_K(bi)NLVESQIVGK_;_K(bi)NLVESQIVGK_;_K(bi)NLVESQIVGK_;_K(bi)NLVESQIVGK_;_K(bi)NLVESQIVGK_;_K(bi)NLVESQIVGK_;_K(bi)NLVESQIVGK_	396	NA	0.580445	0.103343	-0.126062	NA	NA	NA	21.2084	21.0114	21.5868	21.3874	20.9789	21.062	NA	NA	NA	NA	NA	NA
PF3D7_0220100	Plasmodium falciparum 3D7	DnaJ protein, putative	N/A	Biotin (K)	0	1	1	NFKNVFSR	_NFK(bi)NVFSR_;_NFK(bi)NVFSR_;_NFK(bi)NVFSR_;_NFK(bi)NVFSR_	605	NA	NA	NA	NA	NA	NA	NA	NA	NA	NA	NA	NA	NA	NA	NA	NA	NA	NA	NA
PF3D7_0220100	Plasmodium falciparum 3D7	DnaJ protein, putative	N/A	Biotin (K)	0	1	1	NIFKNFENVANSR	_NIFK(bi)NFENVANSR_;_NIFK(bi)NFENVANSR_;_NIFK(bi)NFENVANSR_	590	NA	NA	NA	NA	NA	NA	NA	NA	NA	NA	NA	NA	NA	NA	NA	NA	NA	NA	NA
PF3D7_0220100	Plasmodium falciparum 3D7	DnaJ protein, putative	N/A	Biotin (K)	0	1	1	NKVFSLPNEK	_NK(bi)VFSLPNEK_;_NK(bi)VFSLPNEK_;_NK(bi)VFSLPNEK_;_NK(bi)VFSLPNEK_;_NK(bi)VFSLPNEK_;_NK(bi)VFSLPNEK_;_NK(bi)VFSLPNEK_;_NK(bi)VFSLPNEK_;_NK(bi)VFSLPNEK_;_NK(bi)VFSLPNEK_;_NK(bi)VFSLPNEK_;_NK(bi)VFSLPNEK_	109	NA	0.385739	0.181801	-0.0697022	0.0745321	0.389518	-0.665625	24.4634	24.4218	24.5478	24.4888	24.2877	24.4474	23.3092	24.011	24.1972	23.073	23.1582	23.2893
PF3D7_0220100	Plasmodium falciparum 3D7	DnaJ protein, putative	N/A	Biotin (K)	0	1	1	NLVESQIVGKSNNIEEGENVEYLK	_NLVESQIVGK(bi)SNNIEEGENVEYLK_;_NLVESQIVGK(bi)SNNIEEGENVEYLK_;_NLVESQIVGK(bi)SNNIEEGENVEYLK_	406	NA	NA	NA	NA	NA	NA	NA	NA	NA	NA	NA	NA	NA	NA	NA	NA	NA	NA	NA
PF3D7_0220100	Plasmodium falciparum 3D7	DnaJ protein, putative	N/A	Biotin (K)	0	1	2	NNGKNIPFNTSSSIDNKK	_NNGK(bi)NIPFNTSSSIDNKK_	331	NA	NA	NA	NA	NA	NA	NA	NA	NA	NA	NA	NA	NA	NA	NA	NA	NA	NA	NA
PF3D7_0220100	Plasmodium falciparum 3D7	DnaJ protein, putative	N/A	Biotin (K)	0	1	2	SKNSNDTIKEPVLK	_SKNSNDTIK(bi)EPVLK_;_SKNSNDTIK(bi)EPVLK_	102	NA	NA	NA	NA	NA	NA	NA	NA	NA	NA	NA	NA	NA	NA	NA	NA	NA	NA	NA
PF3D7_0220100	Plasmodium falciparum 3D7	DnaJ protein, putative	N/A	Biotin (K)	0	1	3	SKNSNDTIKEPVLKNK	_SKNSNDTIKEPVLK(bi)NK_;_SKNSNDTIKEPVLK(bi)NK_;_SKNSNDTIKEPVLK(bi)NK_;_SKNSNDTIKEPVLK(bi)NK_;_SKNSNDTIKEPVLK(bi)NK_;_SKNSNDTIKEPVLK(bi)NK_;_SKNSNDTIKEPVLK(bi)NK_;_SKNSNDTIKEPVLK(bi)NK_;_SKNSNDTIKEPVLK(bi)NK_	107	NA	NA	NA	NA	NA	NA	NA	NA	NA	NA	NA	NA	NA	NA	NA	NA	NA	NA	NA
PF3D7_0220100	Plasmodium falciparum 3D7	DnaJ protein, putative	N/A	Biotin (K)	0	1	2	WTEKEEQTKK	_WTEKEEQTK(bi)K_;_WTEKEEQTK(bi)K_;_WTEKEEQTK(bi)K_;_WTEKEEQTK(bi)K_;_WTEKEEQTK(bi)K_	452	NA	0.591961	0.0993324	0.0529581	NA	NA	NA	18.7886	18.9732	18.8809	18.7871	19.0212	18.9933	NA	NA	NA	NA	NA	NA
PF3D7_0220800	Plasmodium falciparum 3D7	cytoadherence linked asexual protein 2	CLAG2	Biotin (K)	0	1	1	VTDKNTTYINYEK	_VTDK(bi)NTTYINYEK_;_VTDK(bi)NTTYINYEK_;_VTDK(bi)NTTYINYEK_;_VTDK(bi)NTTYINYEK_;_VTDK(bi)NTTYINYEK_;_VTDK(bi)NTTYINYEK_;_VTDK(bi)NTTYINYEK_;_VTDK(bi)NTTYINYEK_;_VTDK(bi)NTTYINYEK_;_VTDK(bi)NTTYINYEK_;_VTDK(bi)NTTYINYEK_;_VTDK(bi)NTTYINYEK_	1397	NA	0.0334583	0.708024	-0.567136	NA	NA	NA	22.3761	22.3112	22.603	21.6292	21.8042	22.1554	NA	NA	NA	NA	NA	NA
PF3D7_0221200	Plasmodium falciparum 3D7	Plasmodium exported protein (hyp15), unknown function	N/A	Biotin (K)	0	1	2	CFIKNNSLKSTSGIIR	_CFIKNNSLK(bi)STSGIIR_;_CFIKNNSLK(bi)STSGIIR_;_CFIKNNSLK(bi)STSGIIR_;_CFIKNNSLK(bi)STSGIIR_;_CFIKNNSLK(bi)STSGIIR_;_CFIKNNSLK(bi)STSGIIR_;_CFIKNNSLK(bi)STSGIIR_	125	NA	0.36932	0.186472	0.809588	NA	NA	NA	20.4662	22.6622	22.9472	23.1623	22.6389	22.7031	NA	NA	NA	NA	NA	NA
PF3D7_0301600	Plasmodium falciparum 3D7	Plasmodium exported protein (hyp1), unknown function	GEXP21	Biotin (K)	0	1	2	DNLRNNIYNEQNDFAKEGYSR	_DNLRNNIYNEQNDFAK(bi)EGYSR_;_DNLRNNIYNEQNDFAK(bi)EGYSR_;_DNLRNNIYNEQNDFAK(bi)EGYSR_;_DNLRNNIYNEQNDFAK(bi)EGYSR_;_DNLRNNIYNEQNDFAK(bi)EGYSR_	153	NA	NA	NA	NA	0.977042	0.00605521	-0.0106038	NA	NA	NA	NA	NA	NA	22.0508	21.8652	22.2363	22.6857	21.6038	21.831
PF3D7_0301600	Plasmodium falciparum 3D7	Plasmodium exported protein (hyp1), unknown function	GEXP21	Biotin (K)	0	1	1	DNYDTLNKDSSCNR	_DNYDTLNK(bi)DSSCNR_;_DNYDTLNK(bi)DSSCNR_;_DNYDTLNK(bi)DSSCNR_;_DNYDTLNK(bi)DSSCNR_	407	NA	NA	NA	NA	NA	NA	NA	NA	NA	NA	NA	NA	NA	NA	NA	NA	NA	NA	NA
PF3D7_0301600	Plasmodium falciparum 3D7	Plasmodium exported protein (hyp1), unknown function	GEXP21	Biotin (K)	0	1	2	DNYDTLNKDSSCNRNEK	_DNYDTLNK(bi)DSSCNRNEK_;_DNYDTLNK(bi)DSSCNRNEK_;_DNYDTLNK(bi)DSSCNRNEK_;_DNYDTLNK(bi)DSSCNRNEK_;_DNYDTLNK(bi)DSSCNRNEK_;_DNYDTLNKDSSCNRNEK(bi)_	407;416	NA	NA	NA	NA	0.192521	0.198254	0.200589	NA	NA	NA	NA	NA	NA	22.2791	22.1335	22.2864	22.5922	22.2028	22.5057
PF3D7_0301600	Plasmodium falciparum 3D7	Plasmodium exported protein (hyp1), unknown function	GEXP21	Biotin (K)	0	1	3	DSSCNRNEKMEYYFQSDKFPVDCK	_DSSCNRNEK(bi)MEYYFQSDKFPVDCK_;_DSSCNRNEK(bi)MEYYFQSDKFPVDCK_;_DSSCNRNEK(bi)MEYYFQSDKFPVDCK_;_DSSCNRNEK(bi)MEYYFQSDKFPVDCK_;_DSSCNRNEK(bi)MEYYFQSDKFPVDCK_;_DSSCNRNEK(bi)MEYYFQSDKFPVDCK_;_DSSCNRNEK(bi)MEYYFQSDKFPVDCK_	416	NA	NA	NA	NA	0.331059	0.143109	0.183382	NA	NA	NA	NA	NA	NA	23.1042	22.5889	22.9641	22.9452	23.1238	23.1384
PF3D7_0301600	Plasmodium falciparum 3D7	Plasmodium exported protein (hyp1), unknown function	GEXP21	Biotin (K)	0	1	1	ENIDELNKK	_ENIDELNK(bi)K_;_ENIDELNK(bi)K_;_ENIDELNK(bi)K_;_ENIDELNKK(bi)_;_ENIDELNK(bi)K_	218;219	NA	NA	NA	NA	0.075595	0.38836	0.385304	NA	NA	NA	NA	NA	NA	22.8511	22.8567	23.0113	23.5563	23.2917	23.027
PF3D7_0301600	Plasmodium falciparum 3D7	Plasmodium exported protein (hyp1), unknown function	GEXP21	Biotin (K)	0	1	1	ESKISTSSHSTR	_ESK(bi)ISTSSHSTR_;_ESK(bi)ISTSSHSTR_;_ESK(bi)ISTSSHSTR_;_ESK(bi)ISTSSHSTR_;_ESK(bi)ISTSSHSTR_;_ESK(bi)ISTSSHSTR_;_ESK(bi)ISTSSHSTR_;_ESK(bi)ISTSSHSTR_;_ESK(bi)ISTSSHSTR_;_ESK(bi)ISTSSHSTR_;_ESK(bi)ISTSSHSTR_;_ESK(bi)ISTSSHSTR_	596	NA	NA	NA	NA	0.145812	0.247323	0.335675	NA	NA	NA	NA	NA	NA	22.9628	23.2992	23.4905	23.4647	23.5006	23.7942
PF3D7_0301600	Plasmodium falciparum 3D7	Plasmodium exported protein (hyp1), unknown function	GEXP21	Biotin (K)	0	1	1	EYDSKYNSAEFGTSR	_EYDSK(bi)YNSAEFGTSR_;_EYDSK(bi)YNSAEFGTSR_;_EYDSK(bi)YNSAEFGTSR_;_EYDSK(bi)YNSAEFGTSR_;_EYDSK(bi)YNSAEFGTSR_;_EYDSK(bi)YNSAEFGTSR_;_EYDSK(bi)YNSAEFGTSR_;_EYDSK(bi)YNSAEFGTSR_;_EYDSK(bi)YNSAEFGTSR_;_EYDSK(bi)YNSAEFGTSR_;_EYDSK(bi)YNSAEFGTSR_;_EYDSK(bi)YNSAEFGTSR_;_EYDSK(bi)YNSAEFGTSR_;_EYDSK(bi)YNSAEFGTSR_;_EYDSK(bi)YNSAEFGTSR_;_EYDSK(bi)YNSAEFGTSR_;_EYDSK(bi)YNSAEFGTSR_;_EYDSK(bi)YNSAEFGTSR_;_EY…	163	NA	NA	NA	NA	0.104256	0.30554	0.347069	NA	NA	NA	NA	NA	NA	26.188	26.3329	26.6437	26.922	26.6864	26.5974
PF3D7_0301600	Plasmodium falciparum 3D7	Plasmodium exported protein (hyp1), unknown function	GEXP21	Biotin (K)	0	1	2	EYDSKYNSAEFGTSRK	_EYDSK(bi)YNSAEFGTSRK_;_EYDSK(bi)YNSAEFGTSRK_;_EYDSK(bi)YNSAEFGTSRK_	163	NA	NA	NA	NA	NA	NA	NA	NA	NA	NA	NA	NA	NA	NA	NA	NA	NA	NA	NA
PF3D7_0301600	Plasmodium falciparum 3D7	Plasmodium exported protein (hyp1), unknown function	GEXP21	Biotin (K)	0	1	1	MEYYFQSDKFPVDCK	_M(ox)EYYFQSDK(bi)FPVDCK_;_M(ox)EYYFQSDK(bi)FPVDCK_;_M(ox)EYYFQSDK(bi)FPVDCK_;_M(ox)EYYFQSDK(bi)FPVDCK_;_M(ox)EYYFQSDK(bi)FPVDCK_;_M(ox)EYYFQSDK(bi)FPVDCK_;_M(ox)EYYFQSDK(bi)FPVDCK_;_M(ox)EYYFQSDK(bi)FPVDCK_;_M(ox)EYYFQSDK(bi)FPVDCK_;_M(ox)EYYFQSDK(bi)FPVDCK_;_M(ox)EYYFQSDK(bi)FPVDCK_;_MEYYFQSDK(bi)FPVDCK_;_MEYYFQSDK(bi)FPVDCK_;_MEYYFQSDK(bi)FPVDCK_;_MEYYFQSDK(bi)FPVDCK_;_MEYYFQSDK(bi)FPVDCK_;_ME…	425	NA	NA	NA	NA	0.502899	0.0891213	0.187859	NA	NA	NA	NA	NA	NA	24.232	23.5866	24.3773	24.2551	24.1156	24.3888
PF3D7_0301600	Plasmodium falciparum 3D7	Plasmodium exported protein (hyp1), unknown function	GEXP21	Biotin (K);Oxidation (M)	0	1	1	MEYYFQSDKFPVDCK	_M(ox)EYYFQSDK(bi)FPVDCK_;_M(ox)EYYFQSDK(bi)FPVDCK_;_M(ox)EYYFQSDK(bi)FPVDCK_;_M(ox)EYYFQSDK(bi)FPVDCK_;_M(ox)EYYFQSDK(bi)FPVDCK_;_M(ox)EYYFQSDK(bi)FPVDCK_;_M(ox)EYYFQSDK(bi)FPVDCK_;_M(ox)EYYFQSDK(bi)FPVDCK_;_M(ox)EYYFQSDK(bi)FPVDCK_;_M(ox)EYYFQSDK(bi)FPVDCK_;_M(ox)EYYFQSDK(bi)FPVDCK_;_MEYYFQSDK(bi)FPVDCK_;_MEYYFQSDK(bi)FPVDCK_;_MEYYFQSDK(bi)FPVDCK_;_MEYYFQSDK(bi)FPVDCK_;_MEYYFQSDK(bi)FPVDCK_;_ME…	425	NA	NA	NA	NA	0.733395	0.0434872	-0.207338	NA	NA	NA	NA	NA	NA	23.1656	22.3552	22.8926	23.1922	21.5709	23.0283
PF3D7_0301600	Plasmodium falciparum 3D7	Plasmodium exported protein (hyp1), unknown function	GEXP21	Biotin (K)	0	1	3	NDGRNPFNYQSNNENNKPASYMNEDIYNKNYYNQR	_NDGRNPFNYQSNNENNKPASYMNEDIYNK(bi)NYYNQR_;_NDGRNPFNYQSNNENNKPASYMNEDIYNK(bi)NYYNQR_;_NDGRNPFNYQSNNENNKPASYMNEDIYNK(bi)NYYNQR_;_NDGRNPFNYQSNNENNKPASYMNEDIYNK(bi)NYYNQR_;_NDGRNPFNYQSNNENNK(bi)PASYMNEDIYNKNYYNQR_;_NDGRNPFNYQSNNENNKPASYMNEDIYNK(bi)NYYNQR_;_NDGRNPFNYQSNNENNK(bi)PASYMNEDIYNKNYYNQR_;_NDGRNPFNYQSNNENNKPASYMNEDIYNK(bi)NYYNQR_;_NDGRNPFNYQSNNENNKPASYMNEDIYNK(bi)NYYNQR_	204;192	NA	NA	NA	NA	0.0702949	0.407555	0.649342	NA	NA	NA	NA	NA	NA	24.5866	23.9326	23.8178	24.956	24.5642	24.7649
PF3D7_0301600	Plasmodium falciparum 3D7	Plasmodium exported protein (hyp1), unknown function	GEXP21	Biotin (K)	0	1	2	NEKMEYYFQSDKFPVDCK	_NEK(bi)MEYYFQSDKFPVDCK_;_NEK(bi)MEYYFQSDKFPVDCK_;_NEK(bi)MEYYFQSDKFPVDCK_;_NEK(bi)MEYYFQSDKFPVDCK_;_NEK(bi)MEYYFQSDKFPVDCK_;_NEK(bi)MEYYFQSDKFPVDCK_;_NEK(bi)MEYYFQSDKFPVDCK_	416	NA	NA	NA	NA	0.251847	0.167984	-0.585264	NA	NA	NA	NA	NA	NA	22.6408	21.8895	21.1381	21.2077	21.3042	21.4007
PF3D7_0301600	Plasmodium falciparum 3D7	Plasmodium exported protein (hyp1), unknown function	GEXP21	Biotin (K)	0	1	1	NKYSYPSR	_NK(bi)YSYPSR_;_NK(bi)YSYPSR_;_NK(bi)YSYPSR_;_NK(bi)YSYPSR_;_NK(bi)YSYPSR_;_NK(bi)YSYPSR_;_NK(bi)YSYPSR_;_NK(bi)YSYPSR_;_NK(bi)YSYPSR_;_NK(bi)YSYPSR_;_NK(bi)YSYPSR_;_NK(bi)YSYPSR_;_NK(bi)YSYPSR_;_NK(bi)YSYPSR_;_NK(bi)YSYPSR_;_NK(bi)YSYPSR_;_NK(bi)YSYPSR_;_NK(bi)YSYPSR_;_NK(bi)YSYPSR_;_NK(bi)YSYPSR_;_NK(bi)YSYPSR_;_NK(bi)YSYPSR_;_NK(bi)YSYPSR_	279	NA	NA	NA	NA	0.160912	0.231363	0.405172	NA	NA	NA	NA	NA	NA	24.1675	24.5003	24.6081	25.1	24.9398	24.4516
PF3D7_0301600	Plasmodium falciparum 3D7	Plasmodium exported protein (hyp1), unknown function	GEXP21	Biotin (K)	0	1	1	NNINDDKGMNFVR	_NNINDDK(bi)GMNFVR_;_NNINDDK(bi)GMNFVR_;_NNINDDK(bi)GMNFVR_;_NNINDDK(bi)GMNFVR_;_NNINDDK(bi)GMNFVR_;_NNINDDK(bi)GMNFVR_;_NNINDDK(bi)GMNFVR_	321	NA	NA	NA	NA	NA	NA	NA	NA	NA	NA	NA	NA	NA	NA	NA	NA	NA	NA	NA
PF3D7_0301600	Plasmodium falciparum 3D7	Plasmodium exported protein (hyp1), unknown function	GEXP21	Biotin (K)	0	1	1	NNIYNEQNDFAKEGYSR	_NNIYNEQNDFAK(bi)EGYSR_;_NNIYNEQNDFAK(bi)EGYSR_;_NNIYNEQNDFAK(bi)EGYSR_;_NNIYNEQNDFAK(bi)EGYSR_;_NNIYNEQNDFAK(bi)EGYSR_;_NNIYNEQNDFAK(bi)EGYSR_;_NNIYNEQNDFAK(bi)EGYSR_;_NNIYNEQNDFAK(bi)EGYSR_;_NNIYNEQNDFAK(bi)EGYSR_;_NNIYNEQNDFAK(bi)EGYSR_;_NNIYNEQNDFAK(bi)EGYSR_;_NNIYNEQNDFAK(bi)EGYSR_;_NNIYNEQNDFAK(bi)EGYSR_;_NNIYNEQNDFAK(bi)EGYSR_;_NNIYNEQNDFAK(bi)EGYSR_	153	NA	NA	NA	NA	0.302173	0.153399	0.132999	NA	NA	NA	NA	NA	NA	23.9642	23.9544	24.0845	24.3413	24.01	24.0508
PF3D7_0301600	Plasmodium falciparum 3D7	Plasmodium exported protein (hyp1), unknown function	GEXP21	Biotin (K);Oxidation (M)	0	1	2	NPFNYQSNNENNKPASYMNEDIYNKNYYNQR	_NPFNYQSNNENNKPASYM(ox)NEDIYNK(bi)NYYNQR_;_NPFNYQSNNENNKPASYM(ox)NEDIYNK(bi)NYYNQR_;_NPFNYQSNNENNKPASYMNEDIYNK(bi)NYYNQR_;_NPFNYQSNNENNKPASYMNEDIYNK(bi)NYYNQR_;_NPFNYQSNNENNKPASYMNEDIYNK(bi)NYYNQR_;_NPFNYQSNNENNKPASYMNEDIYNK(bi)NYYNQR_;_NPFNYQSNNENNKPASYMNEDIYNK(bi)NYYNQR_;_NPFNYQSNNENNKPASYMNEDIYNK(bi)NYYNQR_;_NPFNYQSNNENNK(bi)PASYMNEDIYNKNYYNQR_;_NPFNYQSNNENNKPASYMNEDIYNK(bi)NYYNQR_;_NPFNYQSNNE…	204;192	NA	NA	NA	NA	NA	NA	NA	NA	NA	NA	NA	NA	NA	NA	NA	NA	NA	NA	NA
PF3D7_0301600	Plasmodium falciparum 3D7	Plasmodium exported protein (hyp1), unknown function	GEXP21	Biotin (K)	0	1	2	NPFNYQSNNENNKPASYMNEDIYNKNYYNQR	_NPFNYQSNNENNKPASYM(ox)NEDIYNK(bi)NYYNQR_;_NPFNYQSNNENNKPASYM(ox)NEDIYNK(bi)NYYNQR_;_NPFNYQSNNENNKPASYMNEDIYNK(bi)NYYNQR_;_NPFNYQSNNENNKPASYMNEDIYNK(bi)NYYNQR_;_NPFNYQSNNENNKPASYMNEDIYNK(bi)NYYNQR_;_NPFNYQSNNENNKPASYMNEDIYNK(bi)NYYNQR_;_NPFNYQSNNENNKPASYMNEDIYNK(bi)NYYNQR_;_NPFNYQSNNENNKPASYMNEDIYNK(bi)NYYNQR_;_NPFNYQSNNENNK(bi)PASYMNEDIYNKNYYNQR_;_NPFNYQSNNENNKPASYMNEDIYNK(bi)NYYNQR_;_NPFNYQSNNE…	204;192	NA	NA	NA	NA	0.0535804	0.452696	0.525715	NA	NA	NA	NA	NA	NA	24.9784	24.5248	24.3773	25.0924	25.0725	25.2927
PF3D7_0301600	Plasmodium falciparum 3D7	Plasmodium exported protein (hyp1), unknown function	GEXP21	Biotin (K)	0	1	2	NSPFKESKISTSSHSTR	_NSPFKESK(bi)ISTSSHSTR_;_NSPFKESK(bi)ISTSSHSTR_;_NSPFKESK(bi)ISTSSHSTR_;_NSPFKESK(bi)ISTSSHSTR_	596	NA	NA	NA	NA	NA	NA	NA	NA	NA	NA	NA	NA	NA	NA	NA	NA	NA	NA	NA
PF3D7_0301600	Plasmodium falciparum 3D7	Plasmodium exported protein (hyp1), unknown function	GEXP21	Biotin (K)	0	1	1	NYMNDGLFKSQAYNESEK	_NYMNDGLFK(bi)SQAYNESEK_;_NYMNDGLFK(bi)SQAYNESEK_;_NYMNDGLFK(bi)SQAYNESEK_;_NYMNDGLFK(bi)SQAYNESEK_;_NYMNDGLFK(bi)SQAYNESEK_;_NYMNDGLFK(bi)SQAYNESEK_;_NYMNDGLFK(bi)SQAYNESEK_;_NYMNDGLFK(bi)SQAYNESEK_;_NYMNDGLFK(bi)SQAYNESEK_;_NYMNDGLFK(bi)SQAYNESEK_;_NYMNDGLFK(bi)SQAYNESEK_;_NYMNDGLFK(bi)SQAYNESEK_	127	NA	NA	NA	NA	0.0567788	0.444775	0.310859	NA	NA	NA	NA	NA	NA	23.6351	23.6768	23.4491	23.7238	24.0461	23.9238
PF3D7_0301600	Plasmodium falciparum 3D7	Plasmodium exported protein (hyp1), unknown function	GEXP21	Biotin (K)	0	1	2	NYMNDGLFKSQAYNESEKR	_NYMNDGLFK(bi)SQAYNESEKR_;_NYMNDGLFK(bi)SQAYNESEKR_;_NYMNDGLFK(bi)SQAYNESEKR_;_NYMNDGLFK(bi)SQAYNESEKR_;_NYMNDGLFK(bi)SQAYNESEKR_;_NYMNDGLFK(bi)SQAYNESEKR_;_NYMNDGLFK(bi)SQAYNESEKR_;_NYMNDGLFK(bi)SQAYNESEKR_;_NYMNDGLFK(bi)SQAYNESEKR_;_NYMNDGLFK(bi)SQAYNESEKR_;_NYMNDGLFK(bi)SQAYNESEKR_;_NYMNDGLFK(bi)SQAYNESEKR_;_NYMNDGLFK(bi)SQAYNESEKR_;_NYMNDGLFK(bi)SQAYNESEKR_;_NYMNDGLFK(bi)SQAYNESEKR_;_NYMNDGLF…	127	NA	0.860319	0.0316334	-0.0313986	0.126954	0.275151	0.143592	21.4989	20.9704	21.2346	21.2505	21.2916	21.0676	27.2379	27.2763	27.4332	27.3716	27.4876	27.519
PF3D7_0301600	Plasmodium falciparum 3D7	Plasmodium exported protein (hyp1), unknown function	GEXP21	Biotin (K);Oxidation (M)	0	1	2	NYMNDGLFKSQAYNESEKR	_NYMNDGLFK(bi)SQAYNESEKR_;_NYMNDGLFK(bi)SQAYNESEKR_;_NYMNDGLFK(bi)SQAYNESEKR_;_NYMNDGLFK(bi)SQAYNESEKR_;_NYMNDGLFK(bi)SQAYNESEKR_;_NYMNDGLFK(bi)SQAYNESEKR_;_NYMNDGLFK(bi)SQAYNESEKR_;_NYMNDGLFK(bi)SQAYNESEKR_;_NYMNDGLFK(bi)SQAYNESEKR_;_NYMNDGLFK(bi)SQAYNESEKR_;_NYMNDGLFK(bi)SQAYNESEKR_;_NYMNDGLFK(bi)SQAYNESEKR_;_NYMNDGLFK(bi)SQAYNESEKR_;_NYMNDGLFK(bi)SQAYNESEKR_;_NYMNDGLFK(bi)SQAYNESEKR_;_NYMNDGLF…	127	NA	NA	NA	NA	0.247879	0.167984	0.139049	NA	NA	NA	NA	NA	NA	25.0782	25.1179	25.3248	25.4498	25.2337	25.2545
PF3D7_0301600	Plasmodium falciparum 3D7	Plasmodium exported protein (hyp1), unknown function	GEXP21	Biotin (K)	0	1	3	NYMNDGLFKSQAYNESEKRDNLR	_NYM(ox)NDGLFK(bi)SQAYNESEKRDNLR_;_NYM(ox)NDGLFK(bi)SQAYNESEKRDNLR_;_NYM(ox)NDGLFK(bi)SQAYNESEKRDNLR_;_NYM(ox)NDGLFK(bi)SQAYNESEKRDNLR_;_NYM(ox)NDGLFK(bi)SQAYNESEKRDNLR_;_NYM(ox)NDGLFK(bi)SQAYNESEKRDNLR_;_NYMNDGLFK(bi)SQAYNESEKRDNLR_;_NYMNDGLFK(bi)SQAYNESEKRDNLR_;_NYMNDGLFK(bi)SQAYNESEKRDNLR_;_NYMNDGLFK(bi)SQAYNESEKRDNLR_;_NYMNDGLFK(bi)SQAYNESEKRDNLR_;_NYMNDGLFK(bi)SQAYNESEKRDNLR_;_NYMNDGLFK(bi)S…	127	NA	NA	NA	NA	0.709766	0.045136	-0.149515	NA	NA	NA	NA	NA	NA	24.5428	25.3685	25.41	25.1264	24.4744	25.272
PF3D7_0301600	Plasmodium falciparum 3D7	Plasmodium exported protein (hyp1), unknown function	GEXP21	Biotin (K);Oxidation (M)	0	1	3	NYMNDGLFKSQAYNESEKRDNLR	_NYM(ox)NDGLFK(bi)SQAYNESEKRDNLR_;_NYM(ox)NDGLFK(bi)SQAYNESEKRDNLR_;_NYM(ox)NDGLFK(bi)SQAYNESEKRDNLR_;_NYM(ox)NDGLFK(bi)SQAYNESEKRDNLR_;_NYM(ox)NDGLFK(bi)SQAYNESEKRDNLR_;_NYM(ox)NDGLFK(bi)SQAYNESEKRDNLR_;_NYMNDGLFK(bi)SQAYNESEKRDNLR_;_NYMNDGLFK(bi)SQAYNESEKRDNLR_;_NYMNDGLFK(bi)SQAYNESEKRDNLR_;_NYMNDGLFK(bi)SQAYNESEKRDNLR_;_NYMNDGLFK(bi)SQAYNESEKRDNLR_;_NYMNDGLFK(bi)SQAYNESEKRDNLR_;_NYMNDGLFK(bi)S…	127	NA	NA	NA	NA	0.261424	0.16347	0.393329	NA	NA	NA	NA	NA	NA	22.7075	23.6592	23.4768	23.5452	23.6745	23.8039
PF3D7_0301600	Plasmodium falciparum 3D7	Plasmodium exported protein (hyp1), unknown function	GEXP21	Biotin (K)	0	1	1	SEYDTYKSEYDTYK	_SEYDTYK(bi)SEYDTYK_;_SEYDTYK(bi)SEYDTYK_;_SEYDTYK(bi)SEYDTYK_;_SEYDTYK(bi)SEYDTYK_;_SEYDTYK(bi)SEYDTYK_;_SEYDTYK(bi)SEYDTYK_	257	NA	NA	NA	NA	0.301732	0.153399	0.429672	NA	NA	NA	NA	NA	NA	21.4663	21.3401	21.6858	21.9839	22.5	21.2973
PF3D7_0301600	Plasmodium falciparum 3D7	Plasmodium exported protein (hyp1), unknown function	GEXP21	Biotin (K)	0	1	2	SEYDTYKSEYDTYKSQYDTYK	_SEYDTYKSEYDTYK(bi)SQYDTYK_;_SEYDTYKSEYDTYK(bi)SQYDTYK_;_SEYDTYKSEYDTYK(bi)SQYDTYK_;_SEYDTYKSEYDTYK(bi)SQYDTYK_;_SEYDTYKSEYDTYK(bi)SQYDTYK_;_SEYDTYKSEYDTYK(bi)SQYDTYK_;_SEYDTYKSEYDTYK(bi)SQYDTYK_	264	NA	NA	NA	NA	0.52355	0.0820632	0.281415	NA	NA	NA	NA	NA	NA	23.1639	22.2613	23.043	22.5406	23.2899	23.4819
PF3D7_0301600	Plasmodium falciparum 3D7	Plasmodium exported protein (hyp1), unknown function	GEXP21	Biotin (K)	0	1	1	SEYDTYKSQYDTYK	_SEYDTYK(bi)SQYDTYK_;_SEYDTYK(bi)SQYDTYK_;_SEYDTYK(bi)SQYDTYK_;_SEYDTYK(bi)SQYDTYK_;_SEYDTYK(bi)SQYDTYK_;_SEYDTYK(bi)SQYDTYK_	264	NA	NA	NA	NA	0.00583152	0.9269	0.61689	NA	NA	NA	NA	NA	NA	20.7333	20.8866	20.58	21.4941	21.253	21.3034
PF3D7_0301600	Plasmodium falciparum 3D7	Plasmodium exported protein (hyp1), unknown function	GEXP21	Biotin (K)	0	1	1	SGFDDTKK	_SGFDDTK(bi)K_;_SGFDDTK(bi)K_;_SGFDDTK(bi)K_;_SGFDDTK(bi)K_	313	NA	NA	NA	NA	NA	NA	NA	NA	NA	NA	NA	NA	NA	NA	NA	NA	NA	NA	NA
PF3D7_0301600	Plasmodium falciparum 3D7	Plasmodium exported protein (hyp1), unknown function	GEXP21	Biotin (K)	0	1	1	SQAYNESEKR	_SQAYNESEK(bi)R_;_SQAYNESEK(bi)R_;_SQAYNESEK(bi)R_;_SQAYNESEK(bi)R_;_SQAYNESEK(bi)R_;_SQAYNESEK(bi)R_	136	NA	NA	NA	NA	0.0273059	0.557082	0.408125	NA	NA	NA	NA	NA	NA	19.8664	19.8111	20.1284	20.2073	20.3865	20.4364
PF3D7_0301600	Plasmodium falciparum 3D7	Plasmodium exported protein (hyp1), unknown function	GEXP21	Biotin (K)	0	1	2	SQYDDRNKYSYPSR	_SQYDDRNK(bi)YSYPSR_;_SQYDDRNK(bi)YSYPSR_;_SQYDDRNK(bi)YSYPSR_;_SQYDDRNK(bi)YSYPSR_;_SQYDDRNK(bi)YSYPSR_;_SQYDDRNK(bi)YSYPSR_	279	NA	NA	NA	NA	0.540055	0.0776538	0.0709086	NA	NA	NA	NA	NA	NA	23.1539	23.3766	23.2858	23.4647	23.1819	23.3824
PF3D7_0301600	Plasmodium falciparum 3D7	Plasmodium exported protein (hyp1), unknown function	GEXP21	Biotin (K)	0	1	1	SQYDTYKSQYDDR	_SQYDTYK(bi)SQYDDR_;_SQYDTYK(bi)SQYDDR_;_SQYDTYK(bi)SQYDDR_;_SQYDTYK(bi)SQYDDR_;_SQYDTYK(bi)SQYDDR_;_SQYDTYK(bi)SQYDDR_;_SQYDTYK(bi)SQYDDR_;_SQYDTYK(bi)SQYDDR_;_SQYDTYK(bi)SQYDDR_;_SQYDTYK(bi)SQYDDR_;_SQYDTYK(bi)SQYDDR_;_SQYDTYK(bi)SQYDDR_	271	NA	NA	NA	NA	0.0480162	0.47441	0.285759	NA	NA	NA	NA	NA	NA	23.866	23.9616	24.0754	24.3413	24.3283	24.0907
PF3D7_0301600	Plasmodium falciparum 3D7	Plasmodium exported protein (hyp1), unknown function	GEXP21	Biotin (K)	0	1	2	SQYDTYKSQYDDRNK	_SQYDTYK(bi)SQYDDRNK_;_SQYDTYK(bi)SQYDDRNK_;_SQYDTYK(bi)SQYDDRNK_;_SQYDTYK(bi)SQYDDRNK_;_SQYDTYK(bi)SQYDDRNK_;_SQYDTYK(bi)SQYDDRNK_;_SQYDTYK(bi)SQYDDRNK_;_SQYDTYK(bi)SQYDDRNK_;_SQYDTYK(bi)SQYDDRNK_;_SQYDTYK(bi)SQYDDRNK_;_SQYDTYK(bi)SQYDDRNK_;_SQYDTYK(bi)SQYDDRNK_	271	NA	NA	NA	NA	0.174614	0.21568	0.252659	NA	NA	NA	NA	NA	NA	24.4577	24.52	24.4561	24.6938	25.01	24.4879
PF3D7_0301600	Plasmodium falciparum 3D7	Plasmodium exported protein (hyp1), unknown function	GEXP21	Biotin (K)	0	1	3	SQYDTYKSQYDDRNKYSYPSR	_SQYDTYK(bi)SQYDDRNKYSYPSR_;_SQYDTYK(bi)SQYDDRNKYSYPSR_;_SQYDTYK(bi)SQYDDRNKYSYPSR_;_SQYDTYK(bi)SQYDDRNKYSYPSR_;_SQYDTYK(bi)SQYDDRNK(bi)YSYPSR_;_SQYDTYK(bi)SQYDDRNK(bi)YSYPSR_;_SQYDTYK(bi)SQYDDRNK(bi)YSYPSR_	271;279	NA	NA	NA	NA	0.0021555	1.08117	0.442597	NA	NA	NA	NA	NA	NA	21.3756	21.2946	21.4567	21.8911	21.8182	21.7454
PF3D7_0301600	Plasmodium falciparum 3D7	Plasmodium exported protein (hyp1), unknown function	GEXP21	2 Biotin (K)	0	2	3	SQYDTYKSQYDDRNKYSYPSR	_SQYDTYK(bi)SQYDDRNKYSYPSR_;_SQYDTYK(bi)SQYDDRNKYSYPSR_;_SQYDTYK(bi)SQYDDRNKYSYPSR_;_SQYDTYK(bi)SQYDDRNKYSYPSR_;_SQYDTYK(bi)SQYDDRNK(bi)YSYPSR_;_SQYDTYK(bi)SQYDDRNK(bi)YSYPSR_;_SQYDTYK(bi)SQYDDRNK(bi)YSYPSR_	271;279	NA	NA	NA	NA	NA	NA	NA	NA	NA	NA	NA	NA	NA	NA	NA	NA	NA	NA	NA
PF3D7_0301600	Plasmodium falciparum 3D7	Plasmodium exported protein (hyp1), unknown function	GEXP21	Biotin (K)	0	1	1	VVEEVNDESNNKR	_VVEEVNDESNNK(bi)R_;_VVEEVNDESNNK(bi)R_;_VVEEVNDESNNK(bi)R_	398	NA	NA	NA	NA	NA	NA	NA	NA	NA	NA	NA	NA	NA	NA	NA	NA	NA	NA	NA
PF3D7_0301700	Plasmodium falciparum 3D7	Plasmodium exported protein, unknown function	N/A	Biotin (K)	0	1	1	KALILSYIR	_K(bi)ALILSYIR_;_K(bi)ALILSYIR_	174	NA	NA	NA	NA	NA	NA	NA	NA	NA	NA	NA	NA	NA	NA	NA	NA	NA	NA	NA
PF3D7_0301700	Plasmodium falciparum 3D7	Plasmodium exported protein, unknown function	N/A	Biotin (K)	0	1	1	TIVDELNELPNDKK	_TIVDELNELPNDK(bi)K_;_TIVDELNELPNDK(bi)K_;_TIVDELNELPNDK(bi)K_;_TIVDELNELPNDK(bi)K_;_TIVDELNELPNDK(bi)K_;_TIVDELNELPNDK(bi)K_;_TIVDELNELPNDK(bi)K_	173	NA	NA	NA	NA	NA	NA	NA	NA	NA	NA	NA	NA	NA	NA	NA	NA	NA	NA	NA
PF3D7_0302200	Plasmodium falciparum 3D7	cytoadherence linked asexual protein 3.2	CLAG3.2	Biotin (K)	0	1	2	RYDMENAFKNK	_RYDMENAFK(bi)NK_;_RYDMENAFK(bi)NK_;_RYDMENAFK(bi)NK_;_RYDMENAFK(bi)NK_;_RYDMENAFK(bi)NK_;_RYDMENAFK(bi)NK_;_RYDMENAFK(bi)NK_	1320	NA	0.849909	0.0321309	-0.0358389	NA	NA	NA	21.4927	21.1572	21.6515	21.5401	21.4525	21.2013	NA	NA	NA	NA	NA	NA
PF3D7_0302200	Plasmodium falciparum 3D7	cytoadherence linked asexual protein 3.2	CLAG3.2	Biotin (K)	0	1	1	YDMENAFKNK	_YDMENAFK(bi)NK_;_YDMENAFK(bi)NK_;_YDMENAFK(bi)NK_;_YDMENAFK(bi)NK_;_YDMENAFK(bi)NK_;_YDMENAFK(bi)NK_;_YDMENAFK(bi)NK_;_YDMENAFK(bi)NK_;_YDMENAFK(bi)NK_;_YDMENAFKNK(bi)_;_YDMENAFK(bi)NK_	1320;1322	NA	NA	NA	NA	NA	NA	NA	NA	NA	NA	NA	NA	NA	NA	NA	NA	NA	NA	NA
PF3D7_0302500	Plasmodium falciparum 3D7	cytoadherence linked asexual protein 3.1	CLAG3.1	Biotin (K)	0	1	2	NKMSTYVDDFAFFDDCGKNEQFLNER	_NK(bi)MSTYVDDFAFFDDCGKNEQFLNER_;_NK(bi)MSTYVDDFAFFDDCGKNEQFLNER_;_NK(bi)MSTYVDDFAFFDDCGKNEQFLNER_;_NK(bi)MSTYVDDFAFFDDCGKNEQFLNER_;_NK(bi)MSTYVDDFAFFDDCGKNEQFLNER_;_NK(bi)MSTYVDDFAFFDDCGKNEQFLNER_;_NK(bi)MSTYVDDFAFFDDCGKNEQFLNER_;_NK(bi)M(ox)STYVDDFAFFDDCGKNEQFLNER_	1323	NA	0.817633	0.038149	0.168234	NA	NA	NA	22.5085	23.6062	21.254	22.5296	22.5794	22.7644	NA	NA	NA	NA	NA	NA
PF3D7_0302500	Plasmodium falciparum 3D7	cytoadherence linked asexual protein 3.1	CLAG3.1	Biotin (K)	0	1	2	RYDMENAFKNK	_RYDMENAFK(bi)NK_;_RYDMENAFK(bi)NK_;_RYDMENAFK(bi)NK_;_RYDMENAFK(bi)NK_;_RYDMENAFK(bi)NK_;_RYDMENAFK(bi)NK_;_RYDMENAFK(bi)NK_	1321	NA	0.849909	0.0321309	-0.0358389	NA	NA	NA	21.4927	21.1572	21.6515	21.5401	21.4525	21.2013	NA	NA	NA	NA	NA	NA
PF3D7_0302500	Plasmodium falciparum 3D7	cytoadherence linked asexual protein 3.1	CLAG3.1	Biotin (K)	0	1	1	YDMENAFKNK	_YDMENAFK(bi)NK_;_YDMENAFK(bi)NK_;_YDMENAFK(bi)NK_;_YDMENAFK(bi)NK_;_YDMENAFK(bi)NK_;_YDMENAFK(bi)NK_;_YDMENAFK(bi)NK_;_YDMENAFK(bi)NK_;_YDMENAFK(bi)NK_;_YDMENAFKNK(bi)_;_YDMENAFK(bi)NK_	1321;1323	NA	NA	NA	NA	NA	NA	NA	NA	NA	NA	NA	NA	NA	NA	NA	NA	NA	NA	NA
PF3D7_0310200	Plasmodium falciparum 3D7	phd finger protein, putative	N/A	3 Biotin (K);Phospho (STY)	1	3	3	KHIDYVKKSFNYK	_K(bi)HIDYVK(bi)KS(ph)FNYK(bi)_	3317;3323;3329	3325	NA	NA	NA	NA	NA	NA	NA	NA	NA	NA	NA	NA	NA	NA	NA	NA	NA	NA
PF3D7_0320900	Plasmodium falciparum 3D7	histone H2A.Z	H2A.Z	Acetyl (Protein N-term);Biotin (K)	0	1	1	MEVPGKVIGGK	_(ac)MEVPGK(bi)VIGGK_;_(ac)MEVPGK(bi)VIGGK_;_(ac)MEVPGK(bi)VIGGK_;_(ac)MEVPGK(bi)VIGGK_;_(ac)MEVPGK(bi)VIGGK_;_(ac)MEVPGK(bi)VIGGK_;_(ac)M(ox)EVPGK(bi)VIGGK_;_(ac)M(ox)EVPGKVIGGK(bi)_;_(ac)M(ox)EVPGK(bi)VIGGK_;_(ac)M(ox)EVPGKVIGGK(bi)_;_(ac)M(ox)EVPGKVIGGK(bi)_;_(ac)M(ox)EVPGKVIGGK(bi)_;_(ac)M(ox)EVPGK(bi)VIGGK_;_(ac)M(ox)EVPGKVIGGK(bi)_	6;11	NA	0.11426	0.466845	-0.251979	NA	NA	NA	22.0559	21.9163	22.1956	21.9669	21.8092	21.6357	NA	NA	NA	NA	NA	NA
PF3D7_0320900	Plasmodium falciparum 3D7	histone H2A.Z	H2A.Z	Acetyl (Protein N-term);Biotin (K);Oxidation (M)	0	1	1	MEVPGKVIGGK	_(ac)MEVPGK(bi)VIGGK_;_(ac)MEVPGK(bi)VIGGK_;_(ac)MEVPGK(bi)VIGGK_;_(ac)MEVPGK(bi)VIGGK_;_(ac)MEVPGK(bi)VIGGK_;_(ac)MEVPGK(bi)VIGGK_;_(ac)M(ox)EVPGK(bi)VIGGK_;_(ac)M(ox)EVPGKVIGGK(bi)_;_(ac)M(ox)EVPGK(bi)VIGGK_;_(ac)M(ox)EVPGKVIGGK(bi)_;_(ac)M(ox)EVPGKVIGGK(bi)_;_(ac)M(ox)EVPGKVIGGK(bi)_;_(ac)M(ox)EVPGK(bi)VIGGK_;_(ac)M(ox)EVPGKVIGGK(bi)_	6;11	NA	NA	NA	NA	NA	NA	NA	NA	NA	NA	NA	NA	NA	NA	NA	NA	NA	NA	NA
PF3D7_0401800	Plasmodium falciparum 3D7	Plasmodium exported protein (PHISTb), unknown function	PfD80	Biotin (K)	0	1	1	DAANYILKNLDLYDEHEAK	_DAANYILK(bi)NLDLYDEHEAK_;_DAANYILK(bi)NLDLYDEHEAK_;_DAANYILK(bi)NLDLYDEHEAK_;_DAANYILK(bi)NLDLYDEHEAK_;_DAANYILK(bi)NLDLYDEHEAK_;_DAANYILK(bi)NLDLYDEHEAK_;_DAANYILK(bi)NLDLYDEHEAK_;_DAANYILK(bi)NLDLYDEHEAK_;_DAANYILK(bi)NLDLYDEHEAK_;_DAANYILK(bi)NLDLYDEHEAK_;_DAANYILK(bi)NLDLYDEHEAK_;_DAANYILK(bi)NLDLYDEHEAK_;_DAANYILK(bi)NLDLYDEHEAK_;_DAANYILK(bi)NLDLYDEHEAK_;_DAANYILK(bi)NLDLYDEHEAK_;_DAANYILK…	355	NA	0.169165	0.368123	-0.718212	0.0379403	0.522245	0.688892	25.9614	26.2235	25.2778	24.9404	24.6424	25.7252	26.5989	25.8535	26.041	26.8217	26.9108	26.8277
PF3D7_0401800	Plasmodium falciparum 3D7	Plasmodium exported protein (PHISTb), unknown function	PfD80	Biotin (K)	0	1	2	DAANYILKNLDLYDEHEAKK	_DAANYILK(bi)NLDLYDEHEAKK_;_DAANYILK(bi)NLDLYDEHEAKK_;_DAANYILK(bi)NLDLYDEHEAKK_;_DAANYILK(bi)NLDLYDEHEAKK_;_DAANYILK(bi)NLDLYDEHEAKK_;_DAANYILK(bi)NLDLYDEHEAKK_;_DAANYILK(bi)NLDLYDEHEAKK_;_DAANYILK(bi)NLDLYDEHEAKK_;_DAANYILK(bi)NLDLYDEHEAKK_;_DAANYILK(bi)NLDLYDEHEAKK_;_DAANYILK(bi)NLDLYDEHEAKK_;_DAANYILK(bi)NLDLYDEHEAKK_;_DAANYILK(bi)NLDLYDEHEAKK_;_DAANYILK(bi)NLDLYDEHEAKK_;_DAANYILK(bi)NLDLYDEH…	355	NA	0.863894	0.0307404	-0.104179	0.0800652	0.375169	0.488045	26.2062	28.0445	27.0105	26.9519	26.6447	27.3521	28.1043	27.4904	27.6002	28.2482	28.3591	28.0518
PF3D7_0401800	Plasmodium falciparum 3D7	Plasmodium exported protein (PHISTb), unknown function	PfD80	Biotin (K)	0	1	3	DAANYILKNLDLYDEHEAKKHASDR	_DAANYILK(bi)NLDLYDEHEAKKHASDR_;_DAANYILK(bi)NLDLYDEHEAKKHASDR_;_DAANYILK(bi)NLDLYDEHEAKKHASDR_;_DAANYILK(bi)NLDLYDEHEAKKHASDR_;_DAANYILK(bi)NLDLYDEHEAKKHASDR_;_DAANYILK(bi)NLDLYDEHEAKKHASDR_;_DAANYILK(bi)NLDLYDEHEAKKHASDR_;_DAANYILK(bi)NLDLYDEHEAKKHASDR_;_DAANYILK(bi)NLDLYDEHEAKKHASDR_;_DAANYILK(bi)NLDLYDEHEAKKHASDR_;_DAANYILK(bi)NLDLYDEHEAKKHASDR_;_DAANYILK(bi)NLDLYDEHEAKKHASDR_;_DAANYILK(bi)NL…	355	NA	0.944102	0.0125017	-0.0173456	0.00363143	0.997031	0.474705	26.9361	27.1019	26.5912	27.2122	26.6562	26.7088	24.8248	24.7943	24.7905	25.2169	25.4307	25.1861
PF3D7_0401800	Plasmodium falciparum 3D7	Plasmodium exported protein (PHISTb), unknown function	PfD80	Biotin (K)	0	1	1	GFGCDCKDAANYILK	_GFGCDCK(bi)DAANYILK_;_GFGCDCK(bi)DAANYILK_;_GFGCDCK(bi)DAANYILK_;_GFGCDCK(bi)DAANYILK_;_GFGCDCK(bi)DAANYILK_;_GFGCDCK(bi)DAANYILK_;_GFGCDCK(bi)DAANYILK_;_GFGCDCK(bi)DAANYILK_;_GFGCDCK(bi)DAANYILK_;_GFGCDCK(bi)DAANYILK_;_GFGCDCK(bi)DAANYILK_;_GFGCDCK(bi)DAANYILK_;_GFGCDCK(bi)DAANYILK_;_GFGCDCK(bi)DAANYILK_;_GFGCDCK(bi)DAANYILK_;_GFGCDCK(bi)DAANYILK_;_GFGCDCK(bi)DAANYILK_;_GFGCDCK(bi)DAANYILK_;_GF…	347	NA	0.715739	0.0607383	0.0490911	0.014147	0.71757	0.608589	26.5901	26.5785	26.7865	26.9105	26.6214	26.5705	26.6661	26.8223	26.463	27.132	27.4628	27.1824
PF3D7_0401800	Plasmodium falciparum 3D7	Plasmodium exported protein (PHISTb), unknown function	PfD80	Biotin (K)	0	1	2	GFGCDCKDAANYILKNLDLYDEHEAK	_GFGCDCK(bi)DAANYILK(bi)NLDLYDEHEAK_;_GFGCDCK(bi)DAANYILK(bi)NLDLYDEHEAK_;_GFGCDCK(bi)DAANYILK(bi)NLDLYDEHEAK_;_GFGCDCK(bi)DAANYILK(bi)NLDLYDEHEAK_;_GFGCDCK(bi)DAANYILK(bi)NLDLYDEHEAK_;_GFGCDCK(bi)DAANYILK(bi)NLDLYDEHEAK_;_GFGCDCK(bi)DAANYILK(bi)NLDLYDEHEAK_;_GFGCDCK(bi)DAANYILK(bi)NLDLYDEHEAK_;_GFGCDCK(bi)DAANYILK(bi)NLDLYDEHEAK_;_GFGCDCK(bi)DAANYILK(bi)NLDLYDEHEAK_;_GFGCDCK(bi)DAANYILK(bi)NLDLY…	347;355	NA	0.206226	0.321762	0.858178	0.0327568	0.534622	0.346782	23.953	25.5353	25.335	26.1985	25.2668	25.9324	24.3529	24.3105	24.3095	24.4588	24.7506	24.8039
PF3D7_0401800	Plasmodium falciparum 3D7	Plasmodium exported protein (PHISTb), unknown function	PfD80	2 Biotin (K)	0	2	2	GFGCDCKDAANYILKNLDLYDEHEAK	_GFGCDCK(bi)DAANYILK(bi)NLDLYDEHEAK_;_GFGCDCK(bi)DAANYILK(bi)NLDLYDEHEAK_;_GFGCDCK(bi)DAANYILK(bi)NLDLYDEHEAK_;_GFGCDCK(bi)DAANYILK(bi)NLDLYDEHEAK_;_GFGCDCK(bi)DAANYILK(bi)NLDLYDEHEAK_;_GFGCDCK(bi)DAANYILK(bi)NLDLYDEHEAK_;_GFGCDCK(bi)DAANYILK(bi)NLDLYDEHEAK_;_GFGCDCK(bi)DAANYILK(bi)NLDLYDEHEAK_;_GFGCDCK(bi)DAANYILK(bi)NLDLYDEHEAK_;_GFGCDCK(bi)DAANYILK(bi)NLDLYDEHEAK_;_GFGCDCK(bi)DAANYILK(bi)NLDLY…	347;355	NA	0.506193	0.132448	0.169594	NA	NA	NA	27.0581	27.2103	26.4872	27.0767	26.9643	27.2234	NA	NA	NA	NA	NA	NA
PF3D7_0401800	Plasmodium falciparum 3D7	Plasmodium exported protein (PHISTb), unknown function	PfD80	2 Biotin (K)	0	2	3	GFGCDCKDAANYILKNLDLYDEHEAKK	_GFGCDCKDAANYILK(bi)NLDLYDEHEAKK_;_GFGCDCKDAANYILK(bi)NLDLYDEHEAKK_;_GFGCDCKDAANYILK(bi)NLDLYDEHEAKK_;_GFGCDCKDAANYILK(bi)NLDLYDEHEAKK_;_GFGCDCKDAANYILK(bi)NLDLYDEHEAKK_;_GFGCDCKDAANYILK(bi)NLDLYDEHEAKK_;_GFGCDCKDAANYILK(bi)NLDLYDEHEAKK_;_GFGCDCKDAANYILK(bi)NLDLYDEHEAKK_;_GFGCDCKDAANYILK(bi)NLDLYDEHEAKK_;_GFGCDCKDAANYILK(bi)NLDLYDEHEAKK_;_GFGCDCKDAANYILK(bi)NLDLYDEHEAKK_;_GFGCDCKDAANYILK(bi)NLDLY…	355;347	NA	0.766267	0.0447459	0.105278	0.00105765	1.08455	1.21975	27.8985	27.9958	27.0498	27.9921	27.5118	27.7561	22.0357	22.2797	22.5237	23.4528	23.5517	23.4939
PF3D7_0401800	Plasmodium falciparum 3D7	Plasmodium exported protein (PHISTb), unknown function	PfD80	Biotin (K)	0	1	3	GFGCDCKDAANYILKNLDLYDEHEAKK	_GFGCDCKDAANYILK(bi)NLDLYDEHEAKK_;_GFGCDCKDAANYILK(bi)NLDLYDEHEAKK_;_GFGCDCKDAANYILK(bi)NLDLYDEHEAKK_;_GFGCDCKDAANYILK(bi)NLDLYDEHEAKK_;_GFGCDCKDAANYILK(bi)NLDLYDEHEAKK_;_GFGCDCKDAANYILK(bi)NLDLYDEHEAKK_;_GFGCDCKDAANYILK(bi)NLDLYDEHEAKK_;_GFGCDCKDAANYILK(bi)NLDLYDEHEAKK_;_GFGCDCKDAANYILK(bi)NLDLYDEHEAKK_;_GFGCDCKDAANYILK(bi)NLDLYDEHEAKK_;_GFGCDCKDAANYILK(bi)NLDLYDEHEAKK_;_GFGCDCKDAANYILK(bi)NLDLY…	355;347	NA	0.623046	0.0856121	-0.185386	0.0031395	1.01336	0.364949	28.1479	28.4502	27.5122	28.2156	27.4798	27.8588	26.4628	26.4138	26.3172	26.7984	26.6864	26.8039
PF3D7_0401800	Plasmodium falciparum 3D7	Plasmodium exported protein (PHISTb), unknown function	PfD80	Biotin (K)	0	1	1	ILCYCASKNK	_ILCYCASK(bi)NK_;_ILCYCASKNK(bi)_;_ILCYCASK(bi)NK_;_ILCYCASK(bi)NK_;_ILCYCASKNK(bi)_;_ILCYCASKNK(bi)_;_ILCYCASK(bi)NK_;_ILCYCASKNK(bi)_;_ILCYCASK(bi)NK_;_ILCYCASK(bi)NK_;_ILCYCASK(bi)NK_;_ILCYCASK(bi)NK_;_ILCYCASKNK(bi)_;_ILCYCASK(bi)NK_;_ILCYCASK(bi)NK_;_ILCYCASK(bi)NK_;_ILCYCASK(bi)NK_;_ILCYCASK(bi)NK_;_ILCYCASK(bi)NK_	480;482	NA	0.307653	0.234328	-0.128112	0.250438	0.167984	0.295829	25.3373	25.1757	25.4711	25.3348	25.1085	25.1565	22.9806	22.2449	22.4621	22.8064	22.8584	22.9104
PF3D7_0401800	Plasmodium falciparum 3D7	Plasmodium exported protein (PHISTb), unknown function	PfD80	2 Biotin (K)	0	2	2	ILCYCASKNKSLHR	_ILCYCASK(bi)NK(bi)SLHR_;_ILCYCASK(bi)NK(bi)SLHR_;_ILCYCASK(bi)NK(bi)SLHR_;_ILCYCASK(bi)NK(bi)SLHR_;_ILCYCASK(bi)NK(bi)SLHR_;_ILCYCASK(bi)NK(bi)SLHR_;_ILCYCASK(bi)NK(bi)SLHR_;_ILCYCASK(bi)NK(bi)SLHR_;_ILCYCASK(bi)NK(bi)SLHR_;_ILCYCASK(bi)NK(bi)SLHR_;_ILCYCASK(bi)NK(bi)SLHR_;_ILCYCASK(bi)NK(bi)SLHR_	480;482	NA	0.0699353	0.569531	-0.433392	NA	NA	NA	26.3032	25.762	26.0699	25.7678	25.4965	25.5705	NA	NA	NA	NA	NA	NA
PF3D7_0401800	Plasmodium falciparum 3D7	Plasmodium exported protein (PHISTb), unknown function	PfD80	Biotin (K)	0	1	1	IVFQDLSKK	_IVFQDLSK(bi)K_;_IVFQDLSK(bi)K_;_IVFQDLSK(bi)K_;_IVFQDLSK(bi)K_;_IVFQDLSK(bi)K_;_IVFQDLSK(bi)K_	407	NA	0.0867717	0.519607	-0.850319	NA	NA	NA	22.6622	21.5207	21.7082	20.9187	21.0625	21.3589	NA	NA	NA	NA	NA	NA
PF3D7_0401800	Plasmodium falciparum 3D7	Plasmodium exported protein (PHISTb), unknown function	PfD80	Biotin (K)	0	1	2	KHTWDKYELHLPGLAHGK	_KHTWDK(bi)YELHLPGLAHGK_;_KHTWDK(bi)YELHLPGLAHGK_;_KHTWDK(bi)YELHLPGLAHGK_;_KHTWDK(bi)YELHLPGLAHGK_;_KHTWDK(bi)YELHLPGLAHGK_;_KHTWDK(bi)YELHLPGLAHGK_;_KHTWDK(bi)YELHLPGLAHGK_;_KHTWDK(bi)YELHLPGLAHGK_;_KHTWDK(bi)YELHLPGLAHGK_	413	NA	0.481881	0.140018	-0.621532	NA	NA	NA	22.8611	22.9514	21.5428	22.711	22.2435	20.5363	NA	NA	NA	NA	NA	NA
PF3D7_0401800	Plasmodium falciparum 3D7	Plasmodium exported protein (PHISTb), unknown function	PfD80	Biotin (K)	0	1	2	KILCYCASKNK	_KILCYCASK(bi)NK_;_KILCYCASK(bi)NK_;_KILCYCASK(bi)NK_;_KILCYCASK(bi)NK_;_KILCYCASK(bi)NK_;_KILCYCASK(bi)NK_;_KILCYCASK(bi)NK_;_KILCYCASK(bi)NK_;_KILCYCASK(bi)NK_;_KILCYCASK(bi)NK_;_KILCYCASK(bi)NK_	480	NA	0.484445	0.139409	0.699624	NA	NA	NA	20.7054	23.3684	23.4854	23.3019	23.1383	23.2178	NA	NA	NA	NA	NA	NA
PF3D7_0401800	Plasmodium falciparum 3D7	Plasmodium exported protein (PHISTb), unknown function	PfD80	2 Biotin (K)	0	2	3	KILCYCASKNKSLHR	_KILCYCASK(bi)NK(bi)SLHR_;_KILCYCASK(bi)NK(bi)SLHR_;_KILCYCASK(bi)NK(bi)SLHR_;_KILCYCASK(bi)NK(bi)SLHR_;_KILCYCASK(bi)NK(bi)SLHR_;_KILCYCASK(bi)NK(bi)SLHR_;_KILCYCASK(bi)NK(bi)SLHR_;_KILCYCASK(bi)NK(bi)SLHR_;_KILCYCASK(bi)NK(bi)SLHR_;_KILCYCASK(bi)NK(bi)SLHR_;_KILCYCASK(bi)NK(bi)SLHR_;_KILCYCASK(bi)NK(bi)SLHR_;_KILCYCASK(bi)NK(bi)SLHR_	480;482	NA	0.213161	0.314513	-0.176496	NA	NA	NA	23.953	23.7173	23.8035	23.8277	23.6237	23.4928	NA	NA	NA	NA	NA	NA
PF3D7_0401800	Plasmodium falciparum 3D7	Plasmodium exported protein (PHISTb), unknown function	PfD80	Biotin (K)	0	1	2	LRTKDPNMFNK	_LRTK(bi)DPNMFNK_;_LRTK(bi)DPNMFNK_;_LRTK(bi)DPNMFNK_;_LRTK(bi)DPNMFNK_;_LRTK(bi)DPNMFNK_;_LRTK(bi)DPNMFNK_	390	NA	0.089207	0.514506	-0.630456	NA	NA	NA	22.544	22.4003	22.5766	22.0577	22.2392	21.3326	NA	NA	NA	NA	NA	NA
PF3D7_0401800	Plasmodium falciparum 3D7	Plasmodium exported protein (PHISTb), unknown function	PfD80	Biotin (K)	0	1	1	NKIVFQDLSK	_NK(bi)IVFQDLSK_;_NK(bi)IVFQDLSK_;_NK(bi)IVFQDLSK_;_NK(bi)IVFQDLSK_;_NK(bi)IVFQDLSK_;_NK(bi)IVFQDLSK_	399	NA	0.00401633	1.17541	-0.634042	NA	NA	NA	25.2341	24.9488	25.1618	24.5675	24.357	24.5181	NA	NA	NA	NA	NA	NA
PF3D7_0401800	Plasmodium falciparum 3D7	Plasmodium exported protein (PHISTb), unknown function	PfD80	Biotin (K)	0	1	1	NKSLHR	_NK(bi)SLHR_	482	NA	NA	NA	NA	NA	NA	NA	NA	NA	NA	NA	NA	NA	NA	NA	NA	NA	NA	NA
PF3D7_0401800	Plasmodium falciparum 3D7	Plasmodium exported protein (PHISTb), unknown function	PfD80	Biotin (K)	0	1	2	NKSLHRTPEESEQAWK	_NK(bi)SLHRTPEESEQAWK_;_NK(bi)SLHRTPEESEQAWK_;_NK(bi)SLHRTPEESEQAWK_;_NK(bi)SLHRTPEESEQAWK_	482	NA	NA	NA	NA	NA	NA	NA	NA	NA	NA	NA	NA	NA	NA	NA	NA	NA	NA	NA
PF3D7_0401800	Plasmodium falciparum 3D7	Plasmodium exported protein (PHISTb), unknown function	PfD80	Biotin (K)	0	1	1	SSSCSSLASTTKR	_SSSCSSLASTTK(bi)R_;_SSSCSSLASTTK(bi)R_	71	NA	NA	NA	NA	NA	NA	NA	NA	NA	NA	NA	NA	NA	NA	NA	NA	NA	NA	NA
PF3D7_0401800	Plasmodium falciparum 3D7	Plasmodium exported protein (PHISTb), unknown function	PfD80	Biotin (K)	0	1	1	TFSKELSK	_TFSK(bi)ELSK_;_TFSK(bi)ELSK_;_TFSK(bi)ELSK_;_TFSK(bi)ELSK_;_TFSK(bi)ELSK_;_TFSK(bi)ELSK_	378	NA	0.418515	0.166876	0.563551	NA	NA	NA	21.9493	21.8029	20.005	21.8208	21.8478	21.7793	NA	NA	NA	NA	NA	NA
PF3D7_0401800	Plasmodium falciparum 3D7	Plasmodium exported protein (PHISTb), unknown function	PfD80	Biotin (K)	0	1	1	TKDPNMFNK	_TK(bi)DPNM(ox)FNK_;_TK(bi)DPNM(ox)FNK_;_TK(bi)DPNM(ox)FNK_;_TK(bi)DPNM(ox)FNK_;_TK(bi)DPNM(ox)FNK_;_TK(bi)DPNM(ox)FNK_;_TK(bi)DPNM(ox)FNK_;_TK(bi)DPNM(ox)FNK_;_TK(bi)DPNM(ox)FNK_;_TK(bi)DPNM(ox)FNK_;_TK(bi)DPNM(ox)FNK_;_TK(bi)DPNM(ox)FNK_;_TK(bi)DPNM(ox)FNK_;_TK(bi)DPNM(ox)FNK_;_TK(bi)DPNMFNK_;_TK(bi)DPNMFNK_;_TK(bi)DPNMFNK_;_TK(bi)DPNMFNK_;_TK(bi)DPNMFNK_;_TK(bi)DPNMFNK_;_TK(bi)DPNMFNK_;_TK(bi)…	390	NA	0.0500095	0.624135	-0.350189	0.0679984	0.411938	0.650569	25.3244	25.0792	25.4571	24.9857	24.8164	25.008	20.6574	20.767	21.2637	21.903	21.2889	21.4479
PF3D7_0401800	Plasmodium falciparum 3D7	Plasmodium exported protein (PHISTb), unknown function	PfD80	Biotin (K);Oxidation (M)	0	1	1	TKDPNMFNK	_TK(bi)DPNM(ox)FNK_;_TK(bi)DPNM(ox)FNK_;_TK(bi)DPNM(ox)FNK_;_TK(bi)DPNM(ox)FNK_;_TK(bi)DPNM(ox)FNK_;_TK(bi)DPNM(ox)FNK_;_TK(bi)DPNM(ox)FNK_;_TK(bi)DPNM(ox)FNK_;_TK(bi)DPNM(ox)FNK_;_TK(bi)DPNM(ox)FNK_;_TK(bi)DPNM(ox)FNK_;_TK(bi)DPNM(ox)FNK_;_TK(bi)DPNM(ox)FNK_;_TK(bi)DPNM(ox)FNK_;_TK(bi)DPNMFNK_;_TK(bi)DPNMFNK_;_TK(bi)DPNMFNK_;_TK(bi)DPNMFNK_;_TK(bi)DPNMFNK_;_TK(bi)DPNMFNK_;_TK(bi)DPNMFNK_;_TK(bi)…	390	NA	0.919738	0.0176741	-0.0293589	NA	NA	NA	22.5435	23.0524	23.3047	22.7626	23.2518	22.7981	NA	NA	NA	NA	NA	NA
PF3D7_0401800	Plasmodium falciparum 3D7	Plasmodium exported protein (PHISTb), unknown function	PfD80	2 Biotin (K)	0	2	2	TKDPNMFNKNK	_TKDPNM(ox)FNK(bi)NK_;_TKDPNM(ox)FNK(bi)NK_;_TKDPNM(ox)FNK(bi)NK_;_TKDPNM(ox)FNK(bi)NK_;_TKDPNM(ox)FNK(bi)NK_;_TKDPNM(ox)FNK(bi)NK_;_TKDPNM(ox)FNK(bi)NK_;_TK(bi)DPNMFNKNK_;_TKDPNMFNK(bi)NK_;_TKDPNMFNK(bi)NK_;_TKDPNMFNK(bi)NK_;_TK(bi)DPNMFNKNK_;_TKDPNMFNKNK(bi)_;_TKDPNMFNK(bi)NK_;_TK(bi)DPNMFNKNK_;_TKDPNMFNK(bi)NK_;_TKDPNMFNK(bi)NK_;_TK(bi)DPNMFNKNK_;_TKDPNMFNKNK(bi)_;_TKDPNMFNK(bi)NK_;_TK(bi)DPNM…	397;390;399	NA	0.478489	0.140867	-0.392874	NA	NA	NA	22.7049	21.6816	22.1932	21.0677	22.4748	21.8586	NA	NA	NA	NA	NA	NA
PF3D7_0401800	Plasmodium falciparum 3D7	Plasmodium exported protein (PHISTb), unknown function	PfD80	Biotin (K);Oxidation (M)	0	1	2	TKDPNMFNKNK	_TKDPNM(ox)FNK(bi)NK_;_TKDPNM(ox)FNK(bi)NK_;_TKDPNM(ox)FNK(bi)NK_;_TKDPNM(ox)FNK(bi)NK_;_TKDPNM(ox)FNK(bi)NK_;_TKDPNM(ox)FNK(bi)NK_;_TKDPNM(ox)FNK(bi)NK_;_TK(bi)DPNMFNKNK_;_TKDPNMFNK(bi)NK_;_TKDPNMFNK(bi)NK_;_TKDPNMFNK(bi)NK_;_TK(bi)DPNMFNKNK_;_TKDPNMFNKNK(bi)_;_TKDPNMFNK(bi)NK_;_TK(bi)DPNMFNKNK_;_TKDPNMFNK(bi)NK_;_TKDPNMFNK(bi)NK_;_TK(bi)DPNMFNKNK_;_TKDPNMFNKNK(bi)_;_TKDPNMFNK(bi)NK_;_TK(bi)DPNM…	397;390;399	NA	0.674091	0.0714112	0.185708	NA	NA	NA	19.697	19.8237	20.9683	20.2436	20.4766	20.3258	NA	NA	NA	NA	NA	NA
PF3D7_0401800	Plasmodium falciparum 3D7	Plasmodium exported protein (PHISTb), unknown function	PfD80	Biotin (K)	0	1	2	TKDPNMFNKNK	_TKDPNM(ox)FNK(bi)NK_;_TKDPNM(ox)FNK(bi)NK_;_TKDPNM(ox)FNK(bi)NK_;_TKDPNM(ox)FNK(bi)NK_;_TKDPNM(ox)FNK(bi)NK_;_TKDPNM(ox)FNK(bi)NK_;_TKDPNM(ox)FNK(bi)NK_;_TK(bi)DPNMFNKNK_;_TKDPNMFNK(bi)NK_;_TKDPNMFNK(bi)NK_;_TKDPNMFNK(bi)NK_;_TK(bi)DPNMFNKNK_;_TKDPNMFNKNK(bi)_;_TKDPNMFNK(bi)NK_;_TK(bi)DPNMFNKNK_;_TKDPNMFNK(bi)NK_;_TKDPNMFNK(bi)NK_;_TK(bi)DPNMFNKNK_;_TKDPNMFNKNK(bi)_;_TKDPNMFNK(bi)NK_;_TK(bi)DPNM…	397;390;399	NA	0.384049	0.181984	0.197491	NA	NA	NA	23.7651	23.2263	23.6721	23.9172	23.8082	23.5306	NA	NA	NA	NA	NA	NA
PF3D7_0401800	Plasmodium falciparum 3D7	Plasmodium exported protein (PHISTb), unknown function	PfD80	Biotin (K)	0	1	1	TKTFSK	_TK(bi)TFSK_;_TK(bi)TFSK_;_TK(bi)TFSK_;_TK(bi)TFSK_;_TK(bi)TFSK_;_TK(bi)TFSK_;_TK(bi)TFSK_;_TK(bi)TFSK_;_TK(bi)TFSK_;_TK(bi)TFSK_;_TK(bi)TFSK_	374	NA	0.282366	0.251911	-0.233122	0.132339	0.266331	0.399839	24.5711	24.2403	24.8556	24.2176	24.3226	24.4275	20.3997	20.7899	20.8514	21.2462	21.2298	20.7645
PF3D7_0401800	Plasmodium falciparum 3D7	Plasmodium exported protein (PHISTb), unknown function	PfD80	Biotin (K)	0	1	2	TKTFSKELSK	_TK(bi)TFSK(bi)ELSK_;_TK(bi)TFSK(bi)ELSK_;_TK(bi)TFSK(bi)ELSK_;_TK(bi)TFSK(bi)ELSK_;_TK(bi)TFSK(bi)ELSK_;_TK(bi)TFSK(bi)ELSK_;_TK(bi)TFSK(bi)ELSK_;_TK(bi)TFSK(bi)ELSK_;_TK(bi)TFSK(bi)ELSK_;_TKTFSK(bi)ELSK_;_TK(bi)TFSKELSK_;_TK(bi)TFSKELSK_;_TK(bi)TFSKELSK_;_TK(bi)TFSKELSK_	374;378	NA	0.09405	0.505626	1.16015	NA	NA	NA	20.5888	20.2013	20.9763	22.4996	21.8948	20.8523	NA	NA	NA	NA	NA	NA
PF3D7_0401800	Plasmodium falciparum 3D7	Plasmodium exported protein (PHISTb), unknown function	PfD80	2 Biotin (K)	0	2	2	TKTFSKELSK	_TK(bi)TFSK(bi)ELSK_;_TK(bi)TFSK(bi)ELSK_;_TK(bi)TFSK(bi)ELSK_;_TK(bi)TFSK(bi)ELSK_;_TK(bi)TFSK(bi)ELSK_;_TK(bi)TFSK(bi)ELSK_;_TK(bi)TFSK(bi)ELSK_;_TK(bi)TFSK(bi)ELSK_;_TK(bi)TFSK(bi)ELSK_;_TKTFSK(bi)ELSK_;_TK(bi)TFSKELSK_;_TK(bi)TFSKELSK_;_TK(bi)TFSKELSK_;_TK(bi)TFSKELSK_	374;378	NA	0.53163	0.121879	-0.235986	NA	NA	NA	22.4662	22.0132	23.0604	21.9805	22.3018	22.5496	NA	NA	NA	NA	NA	NA
PF3D7_0402100	Plasmodium falciparum 3D7	Plasmodium exported protein (PHISTb), unknown function	N/A	Biotin (K)	0	1	1	GLNPKLNGTHYIDSIR	_GLNPK(bi)LNGTHYIDSIR_;_GLNPK(bi)LNGTHYIDSIR_;_GLNPK(bi)LNGTHYIDSIR_;_GLNPK(bi)LNGTHYIDSIR_;_GLNPK(bi)LNGTHYIDSIR_;_GLNPK(bi)LNGTHYIDSIR_;_GLNPK(bi)LNGTHYIDSIR_;_GLNPK(bi)LNGTHYIDSIR_;_GLNPK(bi)LNGTHYIDSIR_;_GLNPK(bi)LNGTHYIDSIR_;_GLNPK(bi)LNGTHYIDSIR_;_GLNPK(bi)LNGTHYIDSIR_	305	NA	0.957589	0.0105411	-0.0245322	0.329538	0.143109	-0.334135	23.2272	22.8886	22.0338	23.0812	22.7658	22.229	21.5612	21.9561	21.8412	21.6983	21.7595	20.8982
PF3D7_0402100	Plasmodium falciparum 3D7	Plasmodium exported protein (PHISTb), unknown function	N/A	Biotin (K)	0	1	1	KMNTIYHK	_K(bi)MNTIYHK_;_K(bi)MNTIYHK_;_K(bi)MNTIYHK_;_K(bi)MNTIYHK_;_K(bi)MNTIYHK_;_K(bi)MNTIYHK_;_K(bi)MNTIYHK_;_K(bi)MNTIYHK_;_K(bi)MNTIYHK_;_K(bi)MNTIYHK_;_K(bi)MNTIYHK_	383	NA	0.239909	0.291615	0.256926	0.0114858	0.771577	0.450829	20.1443	20.0417	19.5771	20.1779	20.2909	20.065	20.2401	20.447	20.1292	20.7363	20.7871	20.6454
PF3D7_0402100	Plasmodium falciparum 3D7	Plasmodium exported protein (PHISTb), unknown function	N/A	Biotin (K);Oxidation (M)	0	1	2	KMNTIYHKSGLEK	_KMNTIYHK(bi)SGLEK_;_KMNTIYHK(bi)SGLEK_;_KMNTIYHK(bi)SGLEK_;_KMNTIYHK(bi)SGLEK_;_KMNTIYHK(bi)SGLEK_;_KMNTIYHK(bi)SGLEK_;_KMNTIYHK(bi)SGLEK_;_KMNTIYHK(bi)SGLEK_;_KMNTIYHK(bi)SGLEK_;_KMNTIYHK(bi)SGLEK_;_KMNTIYHK(bi)SGLEK_;_KMNTIYHK(bi)SGLEK_;_KMNTIYHK(bi)SGLEK_;_KM(ox)NTIYHK(bi)SGLEK_;_KM(ox)NTIYHK(bi)SGLEK_;_KM(ox)NTIYHK(bi)SGLEK_;_KM(ox)NTIYHK(bi)SGLEK_;_KM(ox)NTIYHK(bi)SGLEK_;_KM(ox)NTIYHK(bi)SG…	390	NA	0.0542688	0.613649	0.862551	0.07828	0.382272	0.632305	18.8999	19.5778	19.9472	20.4754	20.3711	20.166	21.1877	21.1034	21.1455	21.5727	22.3086	21.4521
PF3D7_0402100	Plasmodium falciparum 3D7	Plasmodium exported protein (PHISTb), unknown function	N/A	Biotin (K)	0	1	2	KMNTIYHKSGLEK	_KMNTIYHK(bi)SGLEK_;_KMNTIYHK(bi)SGLEK_;_KMNTIYHK(bi)SGLEK_;_KMNTIYHK(bi)SGLEK_;_KMNTIYHK(bi)SGLEK_;_KMNTIYHK(bi)SGLEK_;_KMNTIYHK(bi)SGLEK_;_KMNTIYHK(bi)SGLEK_;_KMNTIYHK(bi)SGLEK_;_KMNTIYHK(bi)SGLEK_;_KMNTIYHK(bi)SGLEK_;_KMNTIYHK(bi)SGLEK_;_KMNTIYHK(bi)SGLEK_;_KM(ox)NTIYHK(bi)SGLEK_;_KM(ox)NTIYHK(bi)SGLEK_;_KM(ox)NTIYHK(bi)SGLEK_;_KM(ox)NTIYHK(bi)SGLEK_;_KM(ox)NTIYHK(bi)SGLEK_;_KM(ox)NTIYHK(bi)SG…	390	NA	0.602886	0.0954467	0.157394	0.667557	0.0548982	0.0784719	21.6928	21.5514	20.8937	21.6575	21.6785	21.2742	22.4073	22.6185	22.4911	22.8997	22.4416	22.4111
PF3D7_0402100	Plasmodium falciparum 3D7	Plasmodium exported protein (PHISTb), unknown function	N/A	Biotin (K)	0	1	1	MNTIYHKSGLEK	_MNTIYHK(bi)SGLEK_;_MNTIYHK(bi)SGLEK_;_MNTIYHK(bi)SGLEK_;_MNTIYHK(bi)SGLEK_;_MNTIYHK(bi)SGLEK_;_MNTIYHK(bi)SGLEK_;_MNTIYHK(bi)SGLEK_;_MNTIYHK(bi)SGLEK_;_MNTIYHK(bi)SGLEK_;_MNTIYHK(bi)SGLEK_;_MNTIYHKSGLEK(bi)_;_MNTIYHK(bi)SGLEK_;_MNTIYHK(bi)SGLEK_;_MNTIYHK(bi)SGLEK_;_MNTIYHK(bi)SGLEK_;_MNTIYHK(bi)SGLEK_;_MNTIYHK(bi)SGLEK_	390;395	NA	0.505777	0.132448	0.187504	0.398699	0.115803	0.163105	22.397	22.3323	21.7237	22.6179	22.1627	22.2349	23.4845	23.2647	23.3899	23.8377	23.2849	23.5058
PF3D7_0402100	Plasmodium falciparum 3D7	Plasmodium exported protein (PHISTb), unknown function	N/A	Biotin (K)	0	1	2	NKGLNPKLNGTHYIDSIR	_NKGLNPK(bi)LNGTHYIDSIR_;_NKGLNPK(bi)LNGTHYIDSIR_;_NKGLNPK(bi)LNGTHYIDSIR_;_NKGLNPK(bi)LNGTHYIDSIR_;_NKGLNPK(bi)LNGTHYIDSIR_;_NKGLNPK(bi)LNGTHYIDSIR_	305	NA	0.0344221	0.697867	0.743945	NA	NA	NA	20.9785	21.3948	21.1866	21.5788	22.2823	21.9306	NA	NA	NA	NA	NA	NA
PF3D7_0402100	Plasmodium falciparum 3D7	Plasmodium exported protein (PHISTb), unknown function	N/A	Biotin (K)	0	1	1	QHDENNFSDKSGSMVLNEK	_QHDENNFSDK(bi)SGSMVLNEK_;_QHDENNFSDK(bi)SGSMVLNEK_;_QHDENNFSDK(bi)SGSMVLNEK_	123	NA	NA	NA	NA	NA	NA	NA	NA	NA	NA	NA	NA	NA	NA	NA	NA	NA	NA	NA
PF3D7_0402100	Plasmodium falciparum 3D7	Plasmodium exported protein (PHISTb), unknown function	N/A	Biotin (K)	0	1	2	QHDENNFSDKSGSMVLNEKDIQLEK	_QHDENNFSDK(bi)SGSMVLNEKDIQLEK_;_QHDENNFSDK(bi)SGSMVLNEKDIQLEK_;_QHDENNFSDK(bi)SGSMVLNEKDIQLEK_;_QHDENNFSDK(bi)SGSMVLNEKDIQLEK_;_QHDENNFSDK(bi)SGSMVLNEKDIQLEK_;_QHDENNFSDK(bi)SGSMVLNEKDIQLEK_;_QHDENNFSDK(bi)SGSMVLNEKDIQLEK_;_QHDENNFSDK(bi)SGSMVLNEKDIQLEK_;_QHDENNFSDK(bi)SGSMVLNEKDIQLEK_;_QHDENNFSDK(bi)SGSMVLNEKDIQLEK_;_QHDENNFSDK(bi)SGSMVLNEKDIQLEK_;_QHDENNFSDK(bi)SGSMVLNEKDIQLEK_;_QHDENNFSDK(bi)…	123	NA	0.400527	0.17552	0.351452	0.0163754	0.685439	0.598129	23.3702	23.8203	22.92	24.099	23.8648	23.2011	22.3568	22.5852	22.1284	22.9549	22.8303	23.0795
PF3D7_0402400	Plasmodium falciparum 3D7	Plasmodium exported protein, unknown function	GEXP18	Biotin (K)	0	1	1	NLEESFEKYVDNYEYNVR	_NLEESFEK(bi)YVDNYEYNVR_;_NLEESFEK(bi)YVDNYEYNVR_;_NLEESFEK(bi)YVDNYEYNVR_;_NLEESFEK(bi)YVDNYEYNVR_;_NLEESFEK(bi)YVDNYEYNVR_	103	NA	NA	NA	NA	NA	NA	NA	NA	NA	NA	NA	NA	NA	NA	NA	NA	NA	NA	NA
PF3D7_0402400	Plasmodium falciparum 3D7	Plasmodium exported protein, unknown function	GEXP18	Biotin (K)	0	1	1	YNNKNLEESFEK	_YNNK(bi)NLEESFEK_;_YNNK(bi)NLEESFEK_;_YNNK(bi)NLEESFEK_;_YNNK(bi)NLEESFEK_;_YNNK(bi)NLEESFEK_;_YNNK(bi)NLEESFEK_;_YNNK(bi)NLEESFEK_;_YNNK(bi)NLEESFEK_;_YNNK(bi)NLEESFEK_;_YNNK(bi)NLEESFEK_	95	NA	NA	NA	NA	0.0451873	0.48837	0.541475	NA	NA	NA	NA	NA	NA	22.4777	22.3428	22.3405	23.2888	22.8008	22.6958
PF3D7_0406500	Plasmodium falciparum 3D7	NYN domain-containing protein, putative	N/A	2 Biotin (K);Phospho (STY)	1	2	3	EKEEKTEKK	_EK(bi)EEK(bi)T(ph)EKK_;_EK(bi)EEK(bi)T(ph)EKK_	2298;2301	2302	NA	NA	NA	NA	NA	NA	NA	NA	NA	NA	NA	NA	NA	NA	NA	NA	NA	NA
PF3D7_0406500	Plasmodium falciparum 3D7	NYN domain-containing protein, putative	N/A	Biotin (K)	0	1	3	MEKIKMEKIK	_MEK(bi)IKMEKIK_	1690	NA	NA	NA	NA	NA	NA	NA	NA	NA	NA	NA	NA	NA	NA	NA	NA	NA	NA	NA
PF3D7_0424500	Plasmodium falciparum 3D7	serine/threonine protein kinase, FIKK family	FIKK4.1	Biotin (K)	0	1	1	KEGCFGNNLEEK	_K(bi)EGCFGNNLEEK_;_K(bi)EGCFGNNLEEK_;_K(bi)EGCFGNNLEEK_;_K(bi)EGCFGNNLEEK_;_K(bi)EGCFGNNLEEK_;_K(bi)EGCFGNNLEEK_	409	NA	0.00704051	1.0592	-2.4617	0.00132413	1.08455	-1.84069	20.989	21.0924	21.0219	18.5222	19.4331	17.7628	20.9634	21.1463	21.2113	19.5498	18.8382	19.411
PF3D7_0424500	Plasmodium falciparum 3D7	serine/threonine protein kinase, FIKK family	FIKK4.1	Biotin (K)	0	1	2	KKILHESLK	_KK(bi)ILHESLK_;_KK(bi)ILHESLK_;_KK(bi)ILHESLK_	422	NA	0.00341454	1.22642	-0.933416	NA	NA	NA	19.4879	19.0105	19.1296	18.3241	18.1867	18.3169	NA	NA	NA	NA	NA	NA
PF3D7_0424500	Plasmodium falciparum 3D7	serine/threonine protein kinase, FIKK family	FIKK4.1	Biotin (K)	0	1	1	LGKSILGK	_LGK(bi)SILGK_;_LGK(bi)SILGK_;_LGK(bi)SILGK_;_LGK(bi)SILGK_;_LGK(bi)SILGK_;_LGK(bi)SILGK_;_LGK(bi)SILGK_;_LGK(bi)SILGK_;_LGK(bi)SILGK_;_LGK(bi)SILGK_	231	NA	0.000306183	1.73075	1.69109	0.00743241	0.864587	3.50628	21.8181	21.6094	22.0184	23.362	23.6516	23.5055	18.7603	20.9975	19.7785	23.2204	23.8661	22.9686
PF3D7_0424500	Plasmodium falciparum 3D7	serine/threonine protein kinase, FIKK family	FIKK4.1	Biotin (K)	0	1	1	LITCSYNSDKDAK	_LITCSYNSDK(bi)DAK_	219	NA	NA	NA	NA	NA	NA	NA	NA	NA	NA	NA	NA	NA	NA	NA	NA	NA	NA	NA
PF3D7_0424500	Plasmodium falciparum 3D7	serine/threonine protein kinase, FIKK family	FIKK4.1	Biotin (K)	0	1	2	LITCSYNSDKDAKVLYNWK	_LITCSYNSDKDAKVLYNWK(bi)_;_LITCSYNSDKDAK(bi)VLYNWK_;_LITCSYNSDKDAKVLYNWK(bi)_	228;222	NA	0.0160698	0.851514	3.2034	NA	NA	NA	16.996	18.118	19.5847	21.3541	21.9564	20.9983	NA	NA	NA	NA	NA	NA
PF3D7_0424500	Plasmodium falciparum 3D7	serine/threonine protein kinase, FIKK family	FIKK4.1	Biotin (K)	0	1	2	RKEGCFGNNLEEK	_RK(bi)EGCFGNNLEEK_;_RK(bi)EGCFGNNLEEK_;_RK(bi)EGCFGNNLEEK_	409	NA	NA	NA	NA	0.0205929	0.622003	-2.53069	NA	NA	NA	NA	NA	NA	20.7163	21.439	20.4444	17.6927	19.5623	17.7525
PF3D7_0424600	Plasmodium falciparum 3D7	Plasmodium exported protein (PHISTb)	N/A	Biotin (K)	0	1	2	ADFVLDKYIDNLGYCKGDTIK	_ADFVLDKYIDNLGYCK(bi)GDTIK_;_ADFVLDKYIDNLGYCK(bi)GDTIK_;_ADFVLDKYIDNLGYCK(bi)GDTIK_	188	NA	NA	NA	NA	NA	NA	NA	NA	NA	NA	NA	NA	NA	NA	NA	NA	NA	NA	NA
PF3D7_0424700	Plasmodium falciparum 3D7	serine/threonine protein kinase, FIKK family	FIKK4.2	Biotin (K)	0	1	1	FKSIPTVGFSK	_FK(bi)SIPTVGFSK_;_FK(bi)SIPTVGFSK_;_FK(bi)SIPTVGFSK_;_FK(bi)SIPTVGFSK_;_FK(bi)SIPTVGFSK_;_FK(bi)SIPTVGFSK_	281	NA	0.157581	0.386971	-0.30968	NA	NA	NA	21.1727	21.3854	21.1693	21.2159	20.6497	20.9328	NA	NA	NA	NA	NA	NA
PF3D7_0424700	Plasmodium falciparum 3D7	serine/threonine protein kinase, FIKK family	FIKK4.2	Biotin (K)	0	1	1	GKSALNDDSESCR	_GK(bi)SALNDDSESCR_;_GK(bi)SALNDDSESCR_;_GK(bi)SALNDDSESCR_;_GK(bi)SALNDDSESCR_	97	NA	0.11531	0.465092	-0.229376	NA	NA	NA	19.4422	19.2473	19.6372	19.178	19.2128	19.2477	NA	NA	NA	NA	NA	NA
PF3D7_0424700	Plasmodium falciparum 3D7	serine/threonine protein kinase, FIKK family	FIKK4.2	Biotin (K)	0	1	1	LLGCSNKLSVNNVK	_LLGCSNK(bi)LSVNNVK_;_LLGCSNK(bi)LSVNNVK_;_LLGCSNK(bi)LSVNNVK_;_LLGCSNK(bi)LSVNNVK_;_LLGCSNK(bi)LSVNNVK_;_LLGCSNK(bi)LSVNNVK_;_LLGCSNK(bi)LSVNNVK_;_LLGCSNK(bi)LSVNNVK_;_LLGCSNK(bi)LSVNNVK_;_LLGCSNK(bi)LSVNNVK_;_LLGCSNK(bi)LSVNNVK_;_LLGCSNK(bi)LSVNNVK_;_LLGCSNK(bi)LSVNNVK_;_LLGCSNK(bi)LSVNNVK_;_LLGCSNK(bi)LSVNNVK_;_LLGCSNK(bi)LSVNNVK_;_LLGCSNK(bi)LSVNNVK_;_LLGCSNK(bi)LSVNNVK_;_LLGCSNK(bi)LSVNNVK_;…	267	NA	0.495103	0.134173	-0.378056	0.641103	0.0612227	-0.139828	23.2272	22.7122	23.8485	22.1201	23.2396	23.2941	22.814	23.2294	23.6814	22.9016	23.0873	23.3165
PF3D7_0424800	Plasmodium falciparum 3D7	Plasmodium exported protein (PHISTb), unknown function	N/A	Biotin (K)	0	1	1	KCISNILDMTCDSR	_K(bi)CISNILDMTCDSR_;_K(bi)CISNILDMTCDSR_	92	NA	NA	NA	NA	NA	NA	NA	NA	NA	NA	NA	NA	NA	NA	NA	NA	NA	NA	NA
PF3D7_0424900	Plasmodium falciparum 3D7	Plasmodium exported protein (PHISTa), unknown function	N/A	Biotin (K)	0	1	2	GKIQNYLDNDIQLKNGK	_GKIQNYLDNDIQLK(bi)NGK_;_GKIQNYLDNDIQLK(bi)NGK_;_GKIQNYLDNDIQLK(bi)NGK_;_GKIQNYLDNDIQLK(bi)NGK_;_GKIQNYLDNDIQLKNGK(bi)_	199;202	NA	NA	NA	NA	NA	NA	NA	NA	NA	NA	NA	NA	NA	NA	NA	NA	NA	NA	NA
PF3D7_0424900	Plasmodium falciparum 3D7	Plasmodium exported protein (PHISTa), unknown function	N/A	Biotin (K)	0	1	3	GNAQQVDENKNSIKNNGENSNVEKK	_GNAQQVDENKNSIKNNGENSNVEK(bi)K_;_GNAQQVDENKNSIKNNGENSNVEK(bi)K_;_GNAQQVDENKNSIKNNGENSNVEK(bi)K_;_GNAQQVDENKNSIKNNGENSNVEK(bi)K_;_GNAQQVDENKNSIKNNGENSNVEK(bi)K_	123	NA	0.0170497	0.838679	-0.234662	NA	NA	NA	20.044	20.1309	20.0874	19.7544	19.9411	19.8629	NA	NA	NA	NA	NA	NA
PF3D7_0424900	Plasmodium falciparum 3D7	Plasmodium exported protein (PHISTa), unknown function	N/A	Biotin (K)	0	1	1	IQNYLDNDIQLKNGK	_IQNYLDNDIQLKNGK(bi)_;_IQNYLDNDIQLK(bi)NGK_;_IQNYLDNDIQLK(bi)NGK_;_IQNYLDNDIQLKNGK(bi)_	202;199	NA	NA	NA	NA	NA	NA	NA	NA	NA	NA	NA	NA	NA	NA	NA	NA	NA	NA	NA
PF3D7_0424900	Plasmodium falciparum 3D7	Plasmodium exported protein (PHISTa), unknown function	N/A	Biotin (K)	0	1	1	NNGENSNVEKK	_NNGENSNVEKK(bi)_;_NNGENSNVEK(bi)K_;_NNGENSNVEK(bi)K_;_NNGENSNVEK(bi)K_;_NNGENSNVEK(bi)K_;_NNGENSNVEK(bi)K_;_NNGENSNVEK(bi)K_;_NNGENSNVEK(bi)K_;_NNGENSNVEKK(bi)_;_NNGENSNVEKK(bi)_;_NNGENSNVEKK(bi)_;_NNGENSNVEK(bi)K_;_NNGENSNVEK(bi)K_	124;123	NA	0.253589	0.27974	-0.375666	NA	NA	NA	19.8521	19.7227	20.2336	19.1632	19.5364	19.9818	NA	NA	NA	NA	NA	NA
PF3D7_0500800	Plasmodium falciparum 3D7	mature parasite-infected erythrocyte surface antigen	MESA	Biotin (K)	0	1	1	AELDKK	_AELDK(bi)K_;_AELDK(bi)K_;_AELDK(bi)K_;_AELDK(bi)K_;_AELDK(bi)K_;_AELDK(bi)K_;_AELDK(bi)K_;_AELDK(bi)K_;_AELDK(bi)K_;_AELDK(bi)K_;_AELDK(bi)K_	1378	NA	0.927712	0.0171865	0.176521	0.0460977	0.487641	0.481723	21.7773	18.223	21.7772	17.9872	22.0665	22.2534	19.7814	19.9279	19.6349	20.3507	19.9783	20.4605
PF3D7_0500800	Plasmodium falciparum 3D7	mature parasite-infected erythrocyte surface antigen	MESA	Biotin (K)	0	1	2	AELDKKFSEMNVVHQILNYEER	_AELDKK(bi)FSEMNVVHQILNYEER_;_AELDK(bi)KFSEMNVVHQILNYEER_;_AELDKK(bi)FSEMNVVHQILNYEER_;_AELDK(bi)KFSEMNVVHQILNYEER_	1379;1378	NA	NA	NA	NA	NA	NA	NA	NA	NA	NA	NA	NA	NA	NA	NA	NA	NA	NA	NA
PF3D7_0500800	Plasmodium falciparum 3D7	mature parasite-infected erythrocyte surface antigen	MESA	Biotin (K)	0	1	2	AFRELQFIKLR	_AFRELQFIK(bi)LR_;_AFRELQFIK(bi)LR_;_AFRELQFIK(bi)LR_;_AFRELQFIK(bi)LR_;_AFRELQFIK(bi)LR_;_AFRELQFIK(bi)LR_;_AFRELQFIK(bi)LR_;_AFRELQFIK(bi)LR_;_AFRELQFIK(bi)LR_;_AFRELQFIK(bi)LR_;_AFRELQFIK(bi)LR_;_AFRELQFIK(bi)LR_;_AFRELQFIK(bi)LR_;_AFRELQFIK(bi)LR_;_AFRELQFIK(bi)LR_;_AFRELQFIK(bi)LR_;_AFRELQFIK(bi)LR_;_AFRELQFIK(bi)LR_;_AFRELQFIK(bi)LR_;_AFRELQFIK(bi)LR_;_AFRELQFIK(bi)LR_;_AFRELQFIK(bi)LR_;_AF…	190	NA	0.00976848	0.973231	0.422224	0.274402	0.156252	-0.620451	27.871	28.0445	27.8251	28.4529	28.3119	28.2425	24.3236	25.2906	25.5795	24.3919	23.935	25.0055
PF3D7_0500800	Plasmodium falciparum 3D7	mature parasite-infected erythrocyte surface antigen	MESA	Biotin (K)	0	1	3	AFRELQFIKLRDR	_AFRELQFIK(bi)LRDR_;_AFRELQFIK(bi)LRDR_;_AFRELQFIK(bi)LRDR_;_AFRELQFIK(bi)LRDR_;_AFRELQFIK(bi)LRDR_;_AFRELQFIK(bi)LRDR_;_AFRELQFIK(bi)LRDR_;_AFRELQFIK(bi)LRDR_;_AFRELQFIK(bi)LRDR_;_AFRELQFIK(bi)LRDR_;_AFRELQFIK(bi)LRDR_;_AFRELQFIK(bi)LRDR_	190	NA	0.0360325	0.688744	1.75028	NA	NA	NA	25.2459	24.6291	25.8627	27.5287	27.3299	26.13	NA	NA	NA	NA	NA	NA
PF3D7_0500800	Plasmodium falciparum 3D7	mature parasite-infected erythrocyte surface antigen	MESA	2 Biotin (K)	0	2	3	DKMIGKEVIIEEVKEEVK	_DK(bi)M(ox)IGKEVIIEEVKEEVK_;_DKMIGK(bi)EVIIEEVKEEVK_;_DKMIGK(bi)EVIIEEVKEEVK_;_DKMIGK(bi)EVIIEEVKEEVK_;_DKMIGK(bi)EVIIEEVKEEVK_;_DKMIGK(bi)EVIIEEVKEEVK_;_DKMIGK(bi)EVIIEEVKEEVK_;_DKMIGK(bi)EVIIEEVKEEVK_;_DK(bi)MIGKEVIIEEVKEEVK_;_DK(bi)M(ox)IGK(bi)EVIIEEVKEEVK_;_DK(bi)M(ox)IGK(bi)EVIIEEVKEEVK_;_DK(bi)M(ox)IGK(bi)EVIIEEVKEEVK_;_DK(bi)MIGK(bi)EVIIEEVKEEVK_;_DK(bi)MIGK(bi)EVIIEEVKEEVK_	1119;1123	NA	NA	NA	NA	NA	NA	NA	NA	NA	NA	NA	NA	NA	NA	NA	NA	NA	NA	NA
PF3D7_0500800	Plasmodium falciparum 3D7	mature parasite-infected erythrocyte surface antigen	MESA	Biotin (K);Oxidation (M)	0	1	3	DKMIGKEVIIEEVKEEVK	_DK(bi)M(ox)IGKEVIIEEVKEEVK_;_DKMIGK(bi)EVIIEEVKEEVK_;_DKMIGK(bi)EVIIEEVKEEVK_;_DKMIGK(bi)EVIIEEVKEEVK_;_DKMIGK(bi)EVIIEEVKEEVK_;_DKMIGK(bi)EVIIEEVKEEVK_;_DKMIGK(bi)EVIIEEVKEEVK_;_DKMIGK(bi)EVIIEEVKEEVK_;_DK(bi)MIGKEVIIEEVKEEVK_;_DK(bi)M(ox)IGK(bi)EVIIEEVKEEVK_;_DK(bi)M(ox)IGK(bi)EVIIEEVKEEVK_;_DK(bi)M(ox)IGK(bi)EVIIEEVKEEVK_;_DK(bi)MIGK(bi)EVIIEEVKEEVK_;_DK(bi)MIGK(bi)EVIIEEVKEEVK_	1119;1123	NA	NA	NA	NA	NA	NA	NA	NA	NA	NA	NA	NA	NA	NA	NA	NA	NA	NA	NA
PF3D7_0500800	Plasmodium falciparum 3D7	mature parasite-infected erythrocyte surface antigen	MESA	Biotin (K)	0	1	3	DKMIGKEVIIEEVKEEVK	_DK(bi)M(ox)IGKEVIIEEVKEEVK_;_DKMIGK(bi)EVIIEEVKEEVK_;_DKMIGK(bi)EVIIEEVKEEVK_;_DKMIGK(bi)EVIIEEVKEEVK_;_DKMIGK(bi)EVIIEEVKEEVK_;_DKMIGK(bi)EVIIEEVKEEVK_;_DKMIGK(bi)EVIIEEVKEEVK_;_DKMIGK(bi)EVIIEEVKEEVK_;_DK(bi)MIGKEVIIEEVKEEVK_;_DK(bi)M(ox)IGK(bi)EVIIEEVKEEVK_;_DK(bi)M(ox)IGK(bi)EVIIEEVKEEVK_;_DK(bi)M(ox)IGK(bi)EVIIEEVKEEVK_;_DK(bi)MIGK(bi)EVIIEEVKEEVK_;_DK(bi)MIGK(bi)EVIIEEVKEEVK_	1119;1123	NA	0.842336	0.0331368	0.164026	NA	NA	NA	22.0725	22.8805	21.2645	21.1977	22.1811	23.3308	NA	NA	NA	NA	NA	NA
PF3D7_0500800	Plasmodium falciparum 3D7	mature parasite-infected erythrocyte surface antigen	MESA	2 Biotin (K);Oxidation (M)	0	2	3	DKMIGKEVIIEEVKEEVK	_DK(bi)M(ox)IGKEVIIEEVKEEVK_;_DKMIGK(bi)EVIIEEVKEEVK_;_DKMIGK(bi)EVIIEEVKEEVK_;_DKMIGK(bi)EVIIEEVKEEVK_;_DKMIGK(bi)EVIIEEVKEEVK_;_DKMIGK(bi)EVIIEEVKEEVK_;_DKMIGK(bi)EVIIEEVKEEVK_;_DKMIGK(bi)EVIIEEVKEEVK_;_DK(bi)MIGKEVIIEEVKEEVK_;_DK(bi)M(ox)IGK(bi)EVIIEEVKEEVK_;_DK(bi)M(ox)IGK(bi)EVIIEEVKEEVK_;_DK(bi)M(ox)IGK(bi)EVIIEEVKEEVK_;_DK(bi)MIGK(bi)EVIIEEVKEEVK_;_DK(bi)MIGK(bi)EVIIEEVKEEVK_	1119;1123	NA	NA	NA	NA	NA	NA	NA	NA	NA	NA	NA	NA	NA	NA	NA	NA	NA	NA	NA
PF3D7_0500800	Plasmodium falciparum 3D7	mature parasite-infected erythrocyte surface antigen	MESA	Biotin (K)	0	1	2	DKVIGQEIIIEEIKK	_DK(bi)VIGQEIIIEEIKK_;_DK(bi)VIGQEIIIEEIKK_;_DK(bi)VIGQEIIIEEIKK_;_DK(bi)VIGQEIIIEEIKK_;_DK(bi)VIGQEIIIEEIKK_;_DK(bi)VIGQEIIIEEIKK_;_DK(bi)VIGQEIIIEEIKK_;_DK(bi)VIGQEIIIEEIKK_;_DK(bi)VIGQEIIIEEIKK_;_DK(bi)VIGQEIIIEEIKK_;_DK(bi)VIGQEIIIEEIKK_	995	NA	0.523709	0.125208	-0.340266	0.836709	0.0238696	0.0406999	23.6248	24.6234	23.2337	23.0692	23.4338	23.958	21.326	20.7309	20.9022	21.027	21.1214	20.9327
PF3D7_0500800	Plasmodium falciparum 3D7	mature parasite-infected erythrocyte surface antigen	MESA	Biotin (K)	0	1	3	DKVIGQEIIIEEIKKEVK	_DK(bi)VIGQEIIIEEIKKEVK_;_DK(bi)VIGQEIIIEEIKKEVK_;_DK(bi)VIGQEIIIEEIKKEVK_;_DK(bi)VIGQEIIIEEIKKEVK_	995	NA	NA	NA	NA	NA	NA	NA	NA	NA	NA	NA	NA	NA	NA	NA	NA	NA	NA	NA
PF3D7_0500800	Plasmodium falciparum 3D7	mature parasite-infected erythrocyte surface antigen	MESA	Biotin (K)	0	1	2	DKVIGQEIIVEEVKEEIEK	_DK(bi)VIGQEIIVEEVKEEIEK_;_DK(bi)VIGQEIIVEEVKEEIEK_;_DK(bi)VIGQEIIVEEVKEEIEK_;_DK(bi)VIGQEIIVEEVKEEIEK_;_DK(bi)VIGQEIIVEEVKEEIEK_;_DK(bi)VIGQEIIVEEVKEEIEK_	799	NA	NA	NA	NA	0.177802	0.211753	0.368382	NA	NA	NA	NA	NA	NA	21.4448	21.2439	21.6456	22.1483	21.8132	21.478
PF3D7_0500800	Plasmodium falciparum 3D7	mature parasite-infected erythrocyte surface antigen	MESA	Biotin (K)	0	1	3	DKVIGQEVIKGDVNEEGPENKDK	_DK(bi)VIGQEVIKGDVNEEGPENKDK_	832	NA	NA	NA	NA	NA	NA	NA	NA	NA	NA	NA	NA	NA	NA	NA	NA	NA	NA	NA
PF3D7_0500800	Plasmodium falciparum 3D7	mature parasite-infected erythrocyte surface antigen	MESA	Biotin (K)	0	1	1	DKVIGSEK	_DK(bi)VIGSEK_;_DK(bi)VIGSEK_;_DK(bi)VIGSEK_;_DK(bi)VIGSEK_;_DK(bi)VIGSEK_;_DK(bi)VIGSEK_;_DK(bi)VIGSEK_;_DK(bi)VIGSEK_;_DK(bi)VIGSEK_;_DK(bi)VIGSEK_	543	NA	0.688411	0.0670276	0.0878844	0.143204	0.247832	0.406978	23.3341	23.4984	23.2362	23.1281	23.423	23.7812	20.7883	21.1563	21.5244	21.5633	21.6853	21.4414
PF3D7_0500800	Plasmodium falciparum 3D7	mature parasite-infected erythrocyte surface antigen	MESA	Biotin (K)	0	1	2	DKVIGSEKTQK	_DKVIGSEK(bi)TQK_;_DK(bi)VIGSEKTQK_;_DKVIGSEK(bi)TQK_;_DK(bi)VIGSEKTQK_;_DKVIGSEK(bi)TQK_;_DK(bi)VIGSEKTQK_;_DKVIGSEK(bi)TQK_;_DK(bi)VIGSEKTQK_;_DKVIGSEK(bi)TQK_;_DK(bi)VIGSEKTQK_;_DKVIGSEK(bi)TQK_;_DK(bi)VIGSEKTQK_;_DKVIGSEK(bi)TQK_;_DKVIGSEK(bi)TQK_;_DKVIGSEK(bi)TQK_;_DK(bi)VIGSEKTQK_	549;543	NA	0.0929182	0.506783	0.104428	NA	NA	NA	21.1897	21.1463	21.0353	21.2519	21.2195	21.2132	NA	NA	NA	NA	NA	NA
PF3D7_0500800	Plasmodium falciparum 3D7	mature parasite-infected erythrocyte surface antigen	MESA	Biotin (K)	0	1	3	DNVIVQEIMNEDVNEKDTESKDKMIGK	_DNVIVQEIMNEDVNEKDTESKDK(bi)MIGK_;_DNVIVQEIMNEDVNEKDTESKDK(bi)MIGK_	1119	NA	NA	NA	NA	NA	NA	NA	NA	NA	NA	NA	NA	NA	NA	NA	NA	NA	NA	NA
PF3D7_0500800	Plasmodium falciparum 3D7	mature parasite-infected erythrocyte surface antigen	MESA	Biotin (K)	0	1	3	DTENKDKVIGQEIIIEEIKK	_DTENKDK(bi)VIGQEIIIEEIKK_;_DTENK(bi)DKVIGQEIIIEEIKK_;_DTENKDK(bi)VIGQEIIIEEIKK_;_DTENKDK(bi)VIGQEIIIEEIKK_;_DTENK(bi)DKVIGQEIIIEEIKK_;_DTENKDK(bi)VIGQEIIIEEIKK_;_DTENK(bi)DKVIGQEIIIEEIKK_;_DTENK(bi)DKVIGQEIIIEEIKK_;_DTENKDK(bi)VIGQEIIIEEIKK_;_DTENKDK(bi)VIGQEIIIEEIKK_;_DTENKDK(bi)VIGQEIIIEEIKK_;_DTENKDK(bi)VIGQEIIIEEIKK_;_DTENK(bi)DKVIGQEIIIEEIKK_	995;993	NA	0.458791	0.150006	-0.394099	NA	NA	NA	25.0503	25.4859	24.2671	23.8971	24.8082	24.9158	NA	NA	NA	NA	NA	NA
PF3D7_0500800	Plasmodium falciparum 3D7	mature parasite-infected erythrocyte surface antigen	MESA	Biotin (K)	0	1	3	DVIEQEIVSEEVNEKDTKNNDKK	_DVIEQEIVSEEVNEK(bi)DTKNNDKK_;_DVIEQEIVSEEVNEKDTKNNDK(bi)K_;_DVIEQEIVSEEVNEKDTK(bi)NNDKK_;_DVIEQEIVSEEVNEKDTKNNDK(bi)K_	1171;1178;1174	NA	NA	NA	NA	NA	NA	NA	NA	NA	NA	NA	NA	NA	NA	NA	NA	NA	NA	NA
PF3D7_0500800	Plasmodium falciparum 3D7	mature parasite-infected erythrocyte surface antigen	MESA	Biotin (K)	0	1	3	EGIKENDTENKDKVIGQEIITEEVK	_EGIKENDTENKDK(bi)VIGQEIITEEVK_;_EGIKENDTENKDK(bi)VIGQEIITEEVK_	708;733	NA	NA	NA	NA	NA	NA	NA	NA	NA	NA	NA	NA	NA	NA	NA	NA	NA	NA	NA
PF3D7_0500800	Plasmodium falciparum 3D7	mature parasite-infected erythrocyte surface antigen	MESA	Biotin (K)	0	1	2	EGNKVSGPYENSENSNVTSESEETKK	_EGNK(bi)VSGPYENSENSNVTSESEETKK_;_EGNK(bi)VSGPYENSENSNVTSESEETKK_;_EGNK(bi)VSGPYENSENSNVTSESEETKK_;_EGNK(bi)VSGPYENSENSNVTSESEETKK_;_EGNK(bi)VSGPYENSENSNVTSESEETKK_;_EGNK(bi)VSGPYENSENSNVTSESEETKK_;_EGNK(bi)VSGPYENSENSNVTSESEETKK_	340	NA	0.0572405	0.602708	-0.423632	NA	NA	NA	21.1746	21.6467	21.2564	21.0281	20.9722	20.8065	NA	NA	NA	NA	NA	NA
PF3D7_0500800	Plasmodium falciparum 3D7	mature parasite-infected erythrocyte surface antigen	MESA	Biotin (K)	0	1	2	EIMKEDVNEKDTANK	_EIMK(bi)EDVNEKDTANK_;_EIMK(bi)EDVNEKDTANK_;_EIMK(bi)EDVNEKDTANK_	895	NA	NA	NA	NA	NA	NA	NA	NA	NA	NA	NA	NA	NA	NA	NA	NA	NA	NA	NA
PF3D7_0500800	Plasmodium falciparum 3D7	mature parasite-infected erythrocyte surface antigen	MESA	Biotin (K)	0	1	3	EKDTENKDKVIGQEIIIEEIK	_EKDTENK(bi)DKVIGQEIIIEEIK_;_EKDTENK(bi)DKVIGQEIIIEEIK_;_EKDTENK(bi)DKVIGQEIIIEEIK_;_EKDTENK(bi)DKVIGQEIIIEEIK_	993	NA	NA	NA	NA	NA	NA	NA	NA	NA	NA	NA	NA	NA	NA	NA	NA	NA	NA	NA
PF3D7_0500800	Plasmodium falciparum 3D7	mature parasite-infected erythrocyte surface antigen	MESA	Biotin (K)	0	1	1	EKEYLMK	_EK(bi)EYLMK_;_EK(bi)EYLMK_;_EK(bi)EYLMK_;_EK(bi)EYLMK_;_EK(bi)EYLMK_	164	NA	0.0550402	0.612314	-0.33791	NA	NA	NA	20.6301	20.6506	20.5447	20.0598	20.2706	20.4813	NA	NA	NA	NA	NA	NA
PF3D7_0500800	Plasmodium falciparum 3D7	mature parasite-infected erythrocyte surface antigen	MESA	Biotin (K);Oxidation (M)	0	1	2	EKEYLMKELEEMDESDVEK	_EKEYLMK(bi)ELEEMDESDVEK_;_EK(bi)EYLMKELEEMDESDVEK_;_EKEYLMK(bi)ELEEMDESDVEK_;_EK(bi)EYLMKELEEMDESDVEK_;_EKEYLMK(bi)ELEEMDESDVEK_;_EK(bi)EYLMKELEEMDESDVEK_;_EKEYLMK(bi)ELEEMDESDVEK_;_EKEYLMK(bi)ELEEMDESDVEK_;_EKEYLMK(bi)ELEEMDESDVEK_;_EK(bi)EYLMKELEEMDESDVEK_;_EKEYLMK(bi)ELEEMDESDVEK_;_EKEYLMK(bi)ELEEMDESDVEK_;_EKEYLMK(bi)ELEEM(ox)DESDVEK_;_EKEYLMK(bi)ELEEM(ox)DESDVEK_	169;164	NA	NA	NA	NA	NA	NA	NA	NA	NA	NA	NA	NA	NA	NA	NA	NA	NA	NA	NA
PF3D7_0500800	Plasmodium falciparum 3D7	mature parasite-infected erythrocyte surface antigen	MESA	Biotin (K)	0	1	2	EKEYLMKELEEMDESDVEK	_EKEYLMK(bi)ELEEMDESDVEK_;_EK(bi)EYLMKELEEMDESDVEK_;_EKEYLMK(bi)ELEEMDESDVEK_;_EK(bi)EYLMKELEEMDESDVEK_;_EKEYLMK(bi)ELEEMDESDVEK_;_EK(bi)EYLMKELEEMDESDVEK_;_EKEYLMK(bi)ELEEMDESDVEK_;_EKEYLMK(bi)ELEEMDESDVEK_;_EKEYLMK(bi)ELEEMDESDVEK_;_EK(bi)EYLMKELEEMDESDVEK_;_EKEYLMK(bi)ELEEMDESDVEK_;_EKEYLMK(bi)ELEEMDESDVEK_;_EKEYLMK(bi)ELEEM(ox)DESDVEK_;_EKEYLMK(bi)ELEEM(ox)DESDVEK_	169;164	NA	0.189015	0.341126	-0.688476	NA	NA	NA	22.8825	23.8693	22.4394	22.1657	22.4677	22.4923	NA	NA	NA	NA	NA	NA
PF3D7_0500800	Plasmodium falciparum 3D7	mature parasite-infected erythrocyte surface antigen	MESA	Biotin (K);Oxidation (M)	0	1	3	EKEYLMKELEEMDESDVEKAFR	_EKEYLMKELEEM(ox)DESDVEK(bi)AFR_;_EKEYLMKELEEM(ox)DESDVEK(bi)AFR_;_EKEYLMKELEEM(ox)DESDVEK(bi)AFR_;_EKEYLMK(bi)ELEEM(ox)DESDVEKAFR_;_EKEYLMK(bi)ELEEM(ox)DESDVEKAFR_;_EKEYLMKELEEM(ox)DESDVEK(bi)AFR_;_EKEYLMKELEEMDESDVEK(bi)AFR_;_EKEYLMKELEEMDESDVEK(bi)AFR_;_EKEYLMK(bi)ELEEMDESDVEKAFR_;_EKEYLMKELEEMDESDVEK(bi)AFR_;_EKEYLMK(bi)ELEEMDESDVEKAFR_;_EKEYLMKELEEMDESDVEK(bi)AFR_	181;169	NA	NA	NA	NA	NA	NA	NA	NA	NA	NA	NA	NA	NA	NA	NA	NA	NA	NA	NA
PF3D7_0500800	Plasmodium falciparum 3D7	mature parasite-infected erythrocyte surface antigen	MESA	Biotin (K)	0	1	3	EKEYLMKELEEMDESDVEKAFR	_EKEYLMKELEEM(ox)DESDVEK(bi)AFR_;_EKEYLMKELEEM(ox)DESDVEK(bi)AFR_;_EKEYLMKELEEM(ox)DESDVEK(bi)AFR_;_EKEYLMK(bi)ELEEM(ox)DESDVEKAFR_;_EKEYLMK(bi)ELEEM(ox)DESDVEKAFR_;_EKEYLMKELEEM(ox)DESDVEK(bi)AFR_;_EKEYLMKELEEMDESDVEK(bi)AFR_;_EKEYLMKELEEMDESDVEK(bi)AFR_;_EKEYLMK(bi)ELEEMDESDVEKAFR_;_EKEYLMKELEEMDESDVEK(bi)AFR_;_EKEYLMK(bi)ELEEMDESDVEKAFR_;_EKEYLMKELEEMDESDVEK(bi)AFR_	181;169	NA	0.769073	0.0447459	0.220792	NA	NA	NA	22.6212	23.8303	21.4121	22.9952	22.7218	22.8089	NA	NA	NA	NA	NA	NA
PF3D7_0500800	Plasmodium falciparum 3D7	mature parasite-infected erythrocyte surface antigen	MESA	Biotin (K)	0	1	1	EKQNEEYFDEEYIIQSK	_EK(bi)QNEEYFDEEYIIQSK_	1302	NA	NA	NA	NA	NA	NA	NA	NA	NA	NA	NA	NA	NA	NA	NA	NA	NA	NA	NA
PF3D7_0500800	Plasmodium falciparum 3D7	mature parasite-infected erythrocyte surface antigen	MESA	Biotin (K)	0	1	1	ELEEMDESDVEKAFR	_ELEEMDESDVEK(bi)AFR_;_ELEEMDESDVEK(bi)AFR_;_ELEEMDESDVEK(bi)AFR_;_ELEEMDESDVEK(bi)AFR_;_ELEEMDESDVEK(bi)AFR_;_ELEEMDESDVEK(bi)AFR_;_ELEEMDESDVEK(bi)AFR_;_ELEEMDESDVEK(bi)AFR_;_ELEEMDESDVEK(bi)AFR_;_ELEEMDESDVEK(bi)AFR_;_ELEEMDESDVEK(bi)AFR_;_ELEEMDESDVEK(bi)AFR_;_ELEEMDESDVEK(bi)AFR_;_ELEEMDESDVEK(bi)AFR_;_ELEEMDESDVEK(bi)AFR_;_ELEEMDESDVEK(bi)AFR_;_ELEEMDESDVEK(bi)AFR_;_ELEEMDESDVEK(bi)AFR_;_EL…	181	NA	0.901681	0.0228985	-0.0435436	NA	NA	NA	21.9871	22.7317	22.3594	21.9921	22.1439	22.8115	NA	NA	NA	NA	NA	NA
PF3D7_0500800	Plasmodium falciparum 3D7	mature parasite-infected erythrocyte surface antigen	MESA	Biotin (K);Oxidation (M)	0	1	3	ELEEMDESDVEKAFRELQFIKLR	_ELEEM(ox)DESDVEKAFRELQFIK(bi)LR_;_ELEEM(ox)DESDVEKAFRELQFIK(bi)LR_;_ELEEM(ox)DESDVEKAFRELQFIK(bi)LR_;_ELEEM(ox)DESDVEKAFRELQFIK(bi)LR_;_ELEEM(ox)DESDVEKAFRELQFIK(bi)LR_;_ELEEMDESDVEKAFRELQFIK(bi)LR_;_ELEEMDESDVEKAFRELQFIK(bi)LR_;_ELEEMDESDVEKAFRELQFIK(bi)LR_;_ELEEMDESDVEKAFRELQFIK(bi)LR_;_ELEEMDESDVEKAFRELQFIK(bi)LR_;_ELEEMDESDVEKAFRELQFIK(bi)LR_;_ELEEMDESDVEKAFRELQFIK(bi)LR_	190	NA	0.0839292	0.523817	0.932479	NA	NA	NA	23.6805	24.3684	22.9926	24.7623	24.4497	24.6268	NA	NA	NA	NA	NA	NA
PF3D7_0500800	Plasmodium falciparum 3D7	mature parasite-infected erythrocyte surface antigen	MESA	Biotin (K)	0	1	3	ELEEMDESDVEKAFRELQFIKLR	_ELEEM(ox)DESDVEKAFRELQFIK(bi)LR_;_ELEEM(ox)DESDVEKAFRELQFIK(bi)LR_;_ELEEM(ox)DESDVEKAFRELQFIK(bi)LR_;_ELEEM(ox)DESDVEKAFRELQFIK(bi)LR_;_ELEEM(ox)DESDVEKAFRELQFIK(bi)LR_;_ELEEMDESDVEKAFRELQFIK(bi)LR_;_ELEEMDESDVEKAFRELQFIK(bi)LR_;_ELEEMDESDVEKAFRELQFIK(bi)LR_;_ELEEMDESDVEKAFRELQFIK(bi)LR_;_ELEEMDESDVEKAFRELQFIK(bi)LR_;_ELEEMDESDVEKAFRELQFIK(bi)LR_;_ELEEMDESDVEKAFRELQFIK(bi)LR_	190	NA	0.1408	0.415499	0.749953	NA	NA	NA	23.8487	24.8741	24.3614	25.2735	25.4991	24.5614	NA	NA	NA	NA	NA	NA
PF3D7_0500800	Plasmodium falciparum 3D7	mature parasite-infected erythrocyte surface antigen	MESA	Biotin (K)	0	1	1	ELQFIKLR	_ELQFIK(bi)LR_;_ELQFIK(bi)LR_;_ELQFIK(bi)LR_;_ELQFIK(bi)LR_;_ELQFIK(bi)LR_;_ELQFIK(bi)LR_;_ELQFIK(bi)LR_;_ELQFIK(bi)LR_;_ELQFIK(bi)LR_;_ELQFIK(bi)LR_;_ELQFIK(bi)LR_;_ELQFIK(bi)LR_;_ELQFIK(bi)LR_;_ELQFIK(bi)LR_;_ELQFIK(bi)LR_;_ELQFIK(bi)LR_;_ELQFIK(bi)LR_;_ELQFIK(bi)LR_;_ELQFIK(bi)LR_;_ELQFIK(bi)LR_;_ELQFIK(bi)LR_;_ELQFIK(bi)LR_;_ELQFIK(bi)LR_;_ELQFIK(bi)LR_;_ELQFIK(bi)LR_;_ELQFIK(bi)LR_;_ELQFIK(b…	190	NA	0.85774	0.0321309	-0.466096	0.446325	0.104336	1.62448	31.9844	26.9736	32.0091	26.3172	31.4313	31.8203	31.3769	25.8203	31.7815	31.1026	31.3557	31.3938
PF3D7_0500800	Plasmodium falciparum 3D7	mature parasite-infected erythrocyte surface antigen	MESA	Biotin (K)	0	1	2	ELQFIKLRDR	_ELQFIK(bi)LRDR_;_ELQFIK(bi)LRDR_;_ELQFIK(bi)LRDR_;_ELQFIK(bi)LRDR_;_ELQFIK(bi)LRDR_;_ELQFIK(bi)LRDR_;_ELQFIK(bi)LRDR_;_ELQFIK(bi)LRDR_;_ELQFIK(bi)LRDR_;_ELQFIK(bi)LRDR_;_ELQFIK(bi)LRDR_;_ELQFIK(bi)LRDR_;_ELQFIK(bi)LRDR_;_ELQFIK(bi)LRDR_;_ELQFIK(bi)LRDR_;_ELQFIK(bi)LRDR_;_ELQFIK(bi)LRDR_;_ELQFIK(bi)LRDR_;_ELQFIK(bi)LRDR_;_ELQFIK(bi)LRDR_;_ELQFIK(bi)LRDR_;_ELQFIK(bi)LRDR_;_ELQFIK(bi)LRDR_;_ELQFIK(…	190	NA	0.0532965	0.615216	0.738548	0.809285	0.0277399	-0.192934	30.1013	29.8496	30.174	31.2283	30.7624	30.3499	24.3236	26.6877	26.3937	25.7507	25.6088	25.4668
PF3D7_0500800	Plasmodium falciparum 3D7	mature parasite-infected erythrocyte surface antigen	MESA	Biotin (K)	0	1	1	ENDTEGNDKVK	_ENDTEGNDK(bi)VK_;_ENDTEGNDK(bi)VK_;_ENDTEGNDK(bi)VK_;_ENDTEGNDK(bi)VK_	584;617;650	NA	NA	NA	NA	NA	NA	NA	NA	NA	NA	NA	NA	NA	NA	NA	NA	NA	NA	NA
PF3D7_0500800	Plasmodium falciparum 3D7	mature parasite-infected erythrocyte surface antigen	MESA	Biotin (K)	0	1	2	ENDTENKDKVIGQEIITEEVK	_ENDTENKDK(bi)VIGQEIITEEVK_	708;733	NA	NA	NA	NA	NA	NA	NA	NA	NA	NA	NA	NA	NA	NA	NA	NA	NA	NA	NA
PF3D7_0500800	Plasmodium falciparum 3D7	mature parasite-infected erythrocyte surface antigen	MESA	Biotin (K)	0	1	3	ENDTENKDKVIGQEIITEEVKK	_ENDTENKDK(bi)VIGQEIITEEVKK_	733	NA	NA	NA	NA	NA	NA	NA	NA	NA	NA	NA	NA	NA	NA	NA	NA	NA	NA	NA
PF3D7_0500800	Plasmodium falciparum 3D7	mature parasite-infected erythrocyte surface antigen	MESA	Biotin (K)	0	1	3	ENHTESKDKVIGQEIIVEEVKEEIEK	_ENHTESK(bi)DKVIGQEIIVEEVKEEIEK_;_ENHTESKDK(bi)VIGQEIIVEEVKEEIEK_;_ENHTESK(bi)DKVIGQEIIVEEVKEEIEK_;_ENHTESK(bi)DKVIGQEIIVEEVKEEIEK_;_ENHTESK(bi)DKVIGQEIIVEEVKEEIEK_	797;799	NA	0.368389	0.186911	-0.494064	NA	NA	NA	21.772	22.5307	21.0132	20.9178	21.2558	21.66	NA	NA	NA	NA	NA	NA
PF3D7_0500800	Plasmodium falciparum 3D7	mature parasite-infected erythrocyte surface antigen	MESA	Biotin (K)	0	1	2	ENILEIKDIVIGQEVIIEEVKK	_ENILEIK(bi)DIVIGQEVIIEEVKK_;_ENILEIK(bi)DIVIGQEVIIEEVKK_;_ENILEIK(bi)DIVIGQEVIIEEVKK_	764	NA	NA	NA	NA	NA	NA	NA	NA	NA	NA	NA	NA	NA	NA	NA	NA	NA	NA	NA
PF3D7_0500800	Plasmodium falciparum 3D7	mature parasite-infected erythrocyte surface antigen	MESA	Biotin (K)	0	1	3	ETGESKETGESKETGESKETR	_ETGESKETGESKETGESK(bi)ETR_;_ETGESKETGESKETGESK(bi)ETR_;_ETGESKETGESKETGESK(bi)ETR_;_ETGESKETGESKETGESK(bi)ETR_;_ETGESKETGESKETGESK(bi)ETR_;_ETGESKETGESKETGESK(bi)ETR_;_ETGESKETGESKETGESK(bi)ETR_	304	NA	0.0714164	0.567015	-0.886936	NA	NA	NA	19.9433	20.2533	19.7554	19.097	19.675	18.5191	NA	NA	NA	NA	NA	NA
PF3D7_0500800	Plasmodium falciparum 3D7	mature parasite-infected erythrocyte surface antigen	MESA	Biotin (K)	0	1	2	ETGESKETGESKETR	_ETGESKETGESK(bi)ETR_;_ETGESKETGESK(bi)ETR_;_ETGESKETGESK(bi)ETR_;_ETGESKETGESK(bi)ETR_;_ETGESKETGESK(bi)ETR_;_ETGESKETGESK(bi)ETR_;_ETGESKETGESK(bi)ETR_;_ETGESKETGESK(bi)ETR_;_ETGESKETGESK(bi)ETR_;_ETGESKETGESK(bi)ETR_;_ETGESKETGESK(bi)ETR_	304	NA	0.356914	0.195358	-0.190566	NA	NA	NA	19.847	19.8573	19.7538	19.2688	19.822	19.7957	NA	NA	NA	NA	NA	NA
PF3D7_0500800	Plasmodium falciparum 3D7	mature parasite-infected erythrocyte surface antigen	MESA	Biotin (K)	0	1	2	EVIIEEVKEEVKK	_EVIIEEVKEEVK(bi)K_;_EVIIEEVKEEVKK(bi)_;_EVIIEEVKEEVKK(bi)_;_EVIIEEVKEEVKK(bi)_;_EVIIEEVKEEVKK(bi)_;_EVIIEEVKEEVKK(bi)_	1135;1136	NA	0.222286	0.30927	0.560335	NA	NA	NA	22.6712	21.6732	21.6232	22.2296	22.8695	22.5495	NA	NA	NA	NA	NA	NA
PF3D7_0500800	Plasmodium falciparum 3D7	mature parasite-infected erythrocyte surface antigen	MESA	Biotin (K)	0	1	2	GIKENDTEGNDKVK	_GIKENDTEGNDK(bi)VK_;_GIKENDTEGNDK(bi)VK_;_GIKENDTEGNDK(bi)VK_;_GIKENDTEGNDK(bi)VK_;_GIKENDTEGNDK(bi)VK_;_GIKENDTEGNDK(bi)VK_;_GIKENDTEGNDK(bi)VK_;_GIKENDTEGNDK(bi)VK_;_GIKENDTEGNDK(bi)VK_;_GIKENDTEGNDK(bi)VK_;_GIKENDTEGNDK(bi)VK_;_GIKENDTEGNDK(bi)VK_;_GIKENDTEGNDK(bi)VK_;_GIKENDTEGNDK(bi)VK_	584;617;650	NA	0.217676	0.313486	-0.314036	NA	NA	NA	21.9202	22.4169	22.1882	21.543	21.9917	22.0485	NA	NA	NA	NA	NA	NA
PF3D7_0500800	Plasmodium falciparum 3D7	mature parasite-infected erythrocyte surface antigen	MESA	Biotin (K)	0	1	2	GNKENILEIKDIVIGQEVIIEEVK	_GNKENILEIK(bi)DIVIGQEVIIEEVK_;_GNKENILEIK(bi)DIVIGQEVIIEEVK_;_GNKENILEIK(bi)DIVIGQEVIIEEVK_;_GNKENILEIK(bi)DIVIGQEVIIEEVK_	764	NA	NA	NA	NA	NA	NA	NA	NA	NA	NA	NA	NA	NA	NA	NA	NA	NA	NA	NA
PF3D7_0500800	Plasmodium falciparum 3D7	mature parasite-infected erythrocyte surface antigen	MESA	Biotin (K)	0	1	3	GNKENILEIKDIVIGQEVIIEEVKK	_GNKENILEIK(bi)DIVIGQEVIIEEVKK_;_GNKENILEIK(bi)DIVIGQEVIIEEVKK_;_GNKENILEIK(bi)DIVIGQEVIIEEVKK_;_GNKENILEIK(bi)DIVIGQEVIIEEVKK_;_GNKENILEIK(bi)DIVIGQEVIIEEVKK_;_GNKENILEIK(bi)DIVIGQEVIIEEVKK_;_GNKENILEIK(bi)DIVIGQEVIIEEVKK_;_GNKENILEIK(bi)DIVIGQEVIIEEVKK_;_GNKENILEIK(bi)DIVIGQEVIIEEVKK_;_GNKENILEIK(bi)DIVIGQEVIIEEVKK_;_GNKENILEIK(bi)DIVIGQEVIIEEVKK_;_GNKENILEIK(bi)DIVIGQEVIIEEVKK_;_GNKENILEIK(bi)…	764	NA	0.32743	0.21996	0.680301	0.745837	0.0432505	-0.0506481	28.0085	28.9539	27.3196	28.1027	28.7848	29.4354	26.408	26.4006	26.089	26.4453	26.19	26.1103
PF3D7_0500800	Plasmodium falciparum 3D7	mature parasite-infected erythrocyte surface antigen	MESA	Biotin (K)	0	1	1	ILYNLFLEYNPHMNNKQK	_ILYNLFLEYNPHM(ox)NNK(bi)QK_;_ILYNLFLEYNPHM(ox)NNK(bi)QK_;_ILYNLFLEYNPHM(ox)NNK(bi)QK_;_ILYNLFLEYNPHM(ox)NNKQK(bi)_;_ILYNLFLEYNPHM(ox)NNKQK(bi)_;_ILYNLFLEYNPHM(ox)NNK(bi)QK_;_ILYNLFLEYNPHM(ox)NNK(bi)QK_;_ILYNLFLEYNPHM(ox)NNK(bi)QK_;_ILYNLFLEYNPHM(ox)NNK(bi)QK_;_ILYNLFLEYNPHM(ox)NNK(bi)QK_;_ILYNLFLEYNPHM(ox)NNK(bi)QK_;_ILYNLFLEYNPHM(ox)NNK(bi)QK_;_ILYNLFLEYNPHM(ox)NNK(bi)QK_;_ILYNLFLEYNPHMNNKQK(bi…	1371;1373	NA	0.769874	0.0447459	0.151434	0.425183	0.108146	0.15547	24.3971	24.998	23.4002	24.5243	24.1579	24.5675	21.5319	21.3509	21.1699	21.2563	21.5195	21.7433
PF3D7_0500800	Plasmodium falciparum 3D7	mature parasite-infected erythrocyte surface antigen	MESA	Biotin (K);Oxidation (M)	0	1	1	ILYNLFLEYNPHMNNKQK	_ILYNLFLEYNPHM(ox)NNK(bi)QK_;_ILYNLFLEYNPHM(ox)NNK(bi)QK_;_ILYNLFLEYNPHM(ox)NNK(bi)QK_;_ILYNLFLEYNPHM(ox)NNKQK(bi)_;_ILYNLFLEYNPHM(ox)NNKQK(bi)_;_ILYNLFLEYNPHM(ox)NNK(bi)QK_;_ILYNLFLEYNPHM(ox)NNK(bi)QK_;_ILYNLFLEYNPHM(ox)NNK(bi)QK_;_ILYNLFLEYNPHM(ox)NNK(bi)QK_;_ILYNLFLEYNPHM(ox)NNK(bi)QK_;_ILYNLFLEYNPHM(ox)NNK(bi)QK_;_ILYNLFLEYNPHM(ox)NNK(bi)QK_;_ILYNLFLEYNPHM(ox)NNK(bi)QK_;_ILYNLFLEYNPHMNNKQK(bi…	1371;1373	NA	0.618561	0.0877604	0.114388	NA	NA	NA	23.4336	23.8788	23.3545	23.4843	23.9344	23.5915	NA	NA	NA	NA	NA	NA
PF3D7_0500800	Plasmodium falciparum 3D7	mature parasite-infected erythrocyte surface antigen	MESA	2 Biotin (K);Oxidation (M)	0	2	3	ILYNLFLEYNPHMNNKQKAELDKK	_ILYNLFLEYNPHMNNKQKAELDK(bi)K_;_ILYNLFLEYNPHMNNKQKAELDK(bi)K_;_ILYNLFLEYNPHMNNK(bi)QKAELDKK_;_ILYNLFLEYNPHMNNKQKAELDK(bi)K_;_ILYNLFLEYNPHMNNK(bi)QKAELDKK_;_ILYNLFLEYNPHMNNKQKAELDK(bi)K_;_ILYNLFLEYNPHMNNKQKAELDK(bi)K_;_ILYNLFLEYNPHMNNKQKAELDK(bi)K_;_ILYNLFLEYNPHMNNKQKAELDK(bi)K_;_ILYNLFLEYNPHMNNKQKAELDK(bi)K_;_ILYNLFLEYNPHMNNKQK(bi)AELDKK_;_ILYNLFLEYNPHMNNKQKAELDK(bi)K_;_ILYNLFLEYNPHMNNKQKAELDK(bi…	1378;1371;1373	NA	NA	NA	NA	NA	NA	NA	NA	NA	NA	NA	NA	NA	NA	NA	NA	NA	NA	NA
PF3D7_0500800	Plasmodium falciparum 3D7	mature parasite-infected erythrocyte surface antigen	MESA	Biotin (K)	0	1	3	ILYNLFLEYNPHMNNKQKAELDKK	_ILYNLFLEYNPHMNNKQKAELDK(bi)K_;_ILYNLFLEYNPHMNNKQKAELDK(bi)K_;_ILYNLFLEYNPHMNNK(bi)QKAELDKK_;_ILYNLFLEYNPHMNNKQKAELDK(bi)K_;_ILYNLFLEYNPHMNNK(bi)QKAELDKK_;_ILYNLFLEYNPHMNNKQKAELDK(bi)K_;_ILYNLFLEYNPHMNNKQKAELDK(bi)K_;_ILYNLFLEYNPHMNNKQKAELDK(bi)K_;_ILYNLFLEYNPHMNNKQKAELDK(bi)K_;_ILYNLFLEYNPHMNNKQKAELDK(bi)K_;_ILYNLFLEYNPHMNNKQK(bi)AELDKK_;_ILYNLFLEYNPHMNNKQKAELDK(bi)K_;_ILYNLFLEYNPHMNNKQKAELDK(bi…	1378;1371;1373	NA	0.094944	0.505626	0.891651	NA	NA	NA	25.0503	25.3987	24.3298	26.2392	25.8766	25.338	NA	NA	NA	NA	NA	NA
PF3D7_0500800	Plasmodium falciparum 3D7	mature parasite-infected erythrocyte surface antigen	MESA	2 Biotin (K)	0	2	3	ILYNLFLEYNPHMNNKQKAELDKK	_ILYNLFLEYNPHMNNKQKAELDK(bi)K_;_ILYNLFLEYNPHMNNKQKAELDK(bi)K_;_ILYNLFLEYNPHMNNK(bi)QKAELDKK_;_ILYNLFLEYNPHMNNKQKAELDK(bi)K_;_ILYNLFLEYNPHMNNK(bi)QKAELDKK_;_ILYNLFLEYNPHMNNKQKAELDK(bi)K_;_ILYNLFLEYNPHMNNKQKAELDK(bi)K_;_ILYNLFLEYNPHMNNKQKAELDK(bi)K_;_ILYNLFLEYNPHMNNKQKAELDK(bi)K_;_ILYNLFLEYNPHMNNKQKAELDK(bi)K_;_ILYNLFLEYNPHMNNKQK(bi)AELDKK_;_ILYNLFLEYNPHMNNKQKAELDK(bi)K_;_ILYNLFLEYNPHMNNKQKAELDK(bi…	1378;1371;1373	NA	0.284954	0.251911	0.177118	NA	NA	NA	23.0374	23.5231	23.1903	23.4291	23.4122	23.4408	NA	NA	NA	NA	NA	NA
PF3D7_0500800	Plasmodium falciparum 3D7	mature parasite-infected erythrocyte surface antigen	MESA	Biotin (K);Oxidation (M)	0	1	3	ILYNLFLEYNPHMNNKQKAELDKK	_ILYNLFLEYNPHMNNKQKAELDK(bi)K_;_ILYNLFLEYNPHMNNKQKAELDK(bi)K_;_ILYNLFLEYNPHMNNK(bi)QKAELDKK_;_ILYNLFLEYNPHMNNKQKAELDK(bi)K_;_ILYNLFLEYNPHMNNK(bi)QKAELDKK_;_ILYNLFLEYNPHMNNKQKAELDK(bi)K_;_ILYNLFLEYNPHMNNKQKAELDK(bi)K_;_ILYNLFLEYNPHMNNKQKAELDK(bi)K_;_ILYNLFLEYNPHMNNKQKAELDK(bi)K_;_ILYNLFLEYNPHMNNKQKAELDK(bi)K_;_ILYNLFLEYNPHMNNKQK(bi)AELDKK_;_ILYNLFLEYNPHMNNKQKAELDK(bi)K_;_ILYNLFLEYNPHMNNKQKAELDK(bi…	1378;1371;1373	NA	0.0257976	0.757624	0.896942	NA	NA	NA	23.3847	23.4086	23.3608	24.6462	24.4177	23.7812	NA	NA	NA	NA	NA	NA
PF3D7_0500800	Plasmodium falciparum 3D7	mature parasite-infected erythrocyte surface antigen	MESA	Biotin (K)	0	1	3	ITEESKDREGNKVSGPYENSENSNVTSESEETK	_ITEESK(bi)DREGNKVSGPYENSENSNVTSESEETK_;_ITEESKDREGNK(bi)VSGPYENSENSNVTSESEETK_;_ITEESK(bi)DREGNKVSGPYENSENSNVTSESEETK_;_ITEESK(bi)DREGNKVSGPYENSENSNVTSESEETK_	334;340	NA	0.843962	0.0331368	-0.0605908	NA	NA	NA	21.5266	20.6043	21.0655	21.0049	21.1976	20.8121	NA	NA	NA	NA	NA	NA
PF3D7_0500800	Plasmodium falciparum 3D7	mature parasite-infected erythrocyte surface antigen	MESA	Biotin (K)	0	1	1	IYEETKYNK	_IYEETK(bi)YNK_;_IYEETK(bi)YNK_;_IYEETK(bi)YNK_;_IYEETK(bi)YNK_;_IYEETK(bi)YNK_;_IYEETK(bi)YNK_;_IYEETK(bi)YNK_;_IYEETK(bi)YNK_;_IYEETK(bi)YNK_;_IYEETK(bi)YNK_;_IYEETK(bi)YNK_;_IYEETK(bi)YNK_;_IYEETK(bi)YNK_;_IYEETK(bi)YNK_;_IYEETK(bi)YNK_;_IYEETK(bi)YNK_;_IYEETK(bi)YNK_;_IYEETK(bi)YNK_;_IYEETK(bi)YNK_;_IYEETK(bi)YNK_;_IYEETK(bi)YNK_;_IYEETK(bi)YNK_;_IYEETK(bi)YNK_;_IYEETK(bi)YNK_;_IYEETK(bi)YNK_…	313	NA	0.400426	0.17552	0.0730544	0.906245	0.0128931	-0.0227781	24.7116	24.9072	24.8838	24.8134	24.9643	24.9441	22.8615	22.9687	23.1232	22.6529	23.0155	23.2167
PF3D7_0500800	Plasmodium falciparum 3D7	mature parasite-infected erythrocyte surface antigen	MESA	Biotin (K)	0	1	2	IYEETKYNKITSEFR	_IYEETKYNK(bi)ITSEFR_;_IYEETKYNK(bi)ITSEFR_;_IYEETKYNK(bi)ITSEFR_;_IYEETK(bi)YNKITSEFR_;_IYEETKYNK(bi)ITSEFR_;_IYEETKYNK(bi)ITSEFR_;_IYEETKYNK(bi)ITSEFR_;_IYEETK(bi)YNKITSEFR_;_IYEETKYNK(bi)ITSEFR_;_IYEETKYNK(bi)ITSEFR_;_IYEETKYNK(bi)ITSEFR_;_IYEETK(bi)YNKITSEFR_;_IYEETKYNK(bi)ITSEFR_;_IYEETKYNK(bi)ITSEFR_;_IYEETKYNK(bi)ITSEFR_;_IYEETK(bi)YNKITSEFR_;_IYEETKYNK(bi)ITSEFR_;_IYEETKYNK(bi)ITSEFR_;_IY…	316;313	NA	0.457514	0.150006	-0.0875556	0.316799	0.143109	-0.142211	27.1615	27.2291	26.8838	26.9761	27.0187	27.0169	25.1383	24.774	24.8233	24.8332	24.672	24.8039
PF3D7_0500800	Plasmodium falciparum 3D7	mature parasite-infected erythrocyte surface antigen	MESA	2 Biotin (K)	0	2	2	IYEETKYNKITSEFR	_IYEETKYNK(bi)ITSEFR_;_IYEETKYNK(bi)ITSEFR_;_IYEETKYNK(bi)ITSEFR_;_IYEETK(bi)YNKITSEFR_;_IYEETKYNK(bi)ITSEFR_;_IYEETKYNK(bi)ITSEFR_;_IYEETKYNK(bi)ITSEFR_;_IYEETK(bi)YNKITSEFR_;_IYEETKYNK(bi)ITSEFR_;_IYEETKYNK(bi)ITSEFR_;_IYEETKYNK(bi)ITSEFR_;_IYEETK(bi)YNKITSEFR_;_IYEETKYNK(bi)ITSEFR_;_IYEETKYNK(bi)ITSEFR_;_IYEETKYNK(bi)ITSEFR_;_IYEETK(bi)YNKITSEFR_;_IYEETKYNK(bi)ITSEFR_;_IYEETKYNK(bi)ITSEFR_;_IY…	316;313	NA	0.411245	0.168993	-0.286255	NA	NA	NA	21.8611	22.6222	21.8949	21.5116	22.168	21.8398	NA	NA	NA	NA	NA	NA
PF3D7_0500800	Plasmodium falciparum 3D7	mature parasite-infected erythrocyte surface antigen	MESA	Biotin (K)	0	1	3	IYEETKYNKITSEFRETENVK	_IYEETKYNK(bi)ITSEFRETENVK_;_IYEETKYNK(bi)ITSEFRETENVK_;_IYEETK(bi)YNKITSEFRETENVK_;_IYEETKYNK(bi)ITSEFRETENVK_;_IYEETK(bi)YNKITSEFRETENVK_;_IYEETK(bi)YNKITSEFRETENVK_;_IYEETKYNK(bi)ITSEFRETENVK_;_IYEETKYNK(bi)ITSEFRETENVK_;_IYEETKYNK(bi)ITSEFRETENVK_;_IYEETKYNK(bi)ITSEFRETENVK_;_IYEETKYNK(bi)ITSEFRETENVK_;_IYEETK(bi)YNKITSEFRETENVK_;_IYEETK(bi)YNKITSEFRETENVK_;_IYEETKYNK(bi)ITSEFRETENVK_;_IYEETK…	316;313	NA	0.184311	0.34755	0.612191	0.358458	0.133818	-0.0754581	27.2237	25.9825	26.9182	27.1985	27.4733	27.2892	24.7984	24.6051	24.7682	24.6529	24.7174	24.575
PF3D7_0500800	Plasmodium falciparum 3D7	mature parasite-infected erythrocyte surface antigen	MESA	2 Biotin (K)	0	2	3	IYEETKYNKITSEFRETENVK	_IYEETKYNK(bi)ITSEFRETENVK_;_IYEETKYNK(bi)ITSEFRETENVK_;_IYEETK(bi)YNKITSEFRETENVK_;_IYEETKYNK(bi)ITSEFRETENVK_;_IYEETK(bi)YNKITSEFRETENVK_;_IYEETK(bi)YNKITSEFRETENVK_;_IYEETKYNK(bi)ITSEFRETENVK_;_IYEETKYNK(bi)ITSEFRETENVK_;_IYEETKYNK(bi)ITSEFRETENVK_;_IYEETKYNK(bi)ITSEFRETENVK_;_IYEETKYNK(bi)ITSEFRETENVK_;_IYEETK(bi)YNKITSEFRETENVK_;_IYEETK(bi)YNKITSEFRETENVK_;_IYEETKYNK(bi)ITSEFRETENVK_;_IYEETK…	316;313	NA	0.986007	0.00347027	-0.00882889	NA	NA	NA	23.5491	24.5829	23.0726	23.4103	23.8568	23.911	NA	NA	NA	NA	NA	NA
PF3D7_0500800	Plasmodium falciparum 3D7	mature parasite-infected erythrocyte surface antigen	MESA	Biotin (K)	0	1	1	KDNVIGK	_K(bi)DNVIGK_;_K(bi)DNVIGK_;_K(bi)DNVIGK_;_K(bi)DNVIGK_;_K(bi)DNVIGK_;_K(bi)DNVIGK_;_K(bi)DNVIGK_;_K(bi)DNVIGK_;_K(bi)DNVIGK_;_K(bi)DNVIGK_;_K(bi)DNVIGK_;_K(bi)DNVIGK_;_K(bi)DNVIGK_;_K(bi)DNVIGK_;_K(bi)DNVIGK_;_K(bi)DNVIGK_;_K(bi)DNVIGK_;_K(bi)DNVIGK_;_K(bi)DNVIGK_;_K(bi)DNVIGK_;_K(bi)DNVIGK_	885	NA	0.403518	0.174148	-0.174886	0.83285	0.0243508	0.262232	26.2167	26.392	26.0699	25.8852	25.8922	26.3765	20.9175	19.391	22.4439	19.8616	21.1797	22.4978
PF3D7_0500800	Plasmodium falciparum 3D7	mature parasite-infected erythrocyte surface antigen	MESA	Biotin (K)	0	1	2	KDNVIGKEIMK	_KDNVIGK(bi)EIMK_;_KDNVIGK(bi)EIMK_;_KDNVIGK(bi)EIMK_;_KDNVIGK(bi)EIMK_;_KDNVIGK(bi)EIMK_;_KDNVIGK(bi)EIMK_;_KDNVIGK(bi)EIMK_;_KDNVIGK(bi)EIMK_;_KDNVIGK(bi)EIMK_;_KDNVIGK(bi)EIMK_;_KDNVIGK(bi)EIMK_;_KDNVIGK(bi)EIMK_;_KDNVIGK(bi)EIMK_;_KDNVIGK(bi)EIMK_	891	NA	0.00302856	1.25178	-0.616712	NA	NA	NA	23.5928	23.6404	23.3974	22.8062	22.9732	23.001	NA	NA	NA	NA	NA	NA
PF3D7_0500800	Plasmodium falciparum 3D7	mature parasite-infected erythrocyte surface antigen	MESA	Biotin (K)	0	1	3	KDNVIGKEIMKEDVNEK	_KDNVIGK(bi)EIMKEDVNEK_;_KDNVIGK(bi)EIMKEDVNEK_;_KDNVIGK(bi)EIMKEDVNEK_;_KDNVIGK(bi)EIMKEDVNEK_;_KDNVIGK(bi)EIMKEDVNEK_;_KDNVIGK(bi)EIMKEDVNEK_;_KDNVIGK(bi)EIMKEDVNEK_;_KDNVIGK(bi)EIMKEDVNEK_;_KDNVIGK(bi)EIMKEDVNEK_;_KDNVIGK(bi)EIMKEDVNEK_;_KDNVIGK(bi)EIMKEDVNEK_;_KDNVIGK(bi)EIMKEDVNEK_;_KDNVIGK(bi)EIMKEDVNEK_	891	NA	0.31761	0.227051	-0.253742	NA	NA	NA	22.822	22.6543	22.3413	22.2422	22.1245	22.6896	NA	NA	NA	NA	NA	NA
PF3D7_0500800	Plasmodium falciparum 3D7	mature parasite-infected erythrocyte surface antigen	MESA	Biotin (K)	0	1	1	KDVIEQEIVSEEVNEK	_K(bi)DVIEQEIVSEEVNEK_;_K(bi)DVIEQEIVSEEVNEK_;_K(bi)DVIEQEIVSEEVNEK_	1156	NA	NA	NA	NA	NA	NA	NA	NA	NA	NA	NA	NA	NA	NA	NA	NA	NA	NA	NA
PF3D7_0500800	Plasmodium falciparum 3D7	mature parasite-infected erythrocyte surface antigen	MESA	Biotin (K)	0	1	2	KDVIEQEIVSEEVNEKDTK	_K(bi)DVIEQEIVSEEVNEKDTK_;_K(bi)DVIEQEIVSEEVNEKDTK_;_K(bi)DVIEQEIVSEEVNEKDTK_;_K(bi)DVIEQEIVSEEVNEKDTK_;_K(bi)DVIEQEIVSEEVNEKDTK_;_K(bi)DVIEQEIVSEEVNEKDTK_;_K(bi)DVIEQEIVSEEVNEKDTK_;_K(bi)DVIEQEIVSEEVNEKDTK_;_K(bi)DVIEQEIVSEEVNEKDTK_;_K(bi)DVIEQEIVSEEVNEKDTK_;_K(bi)DVIEQEIVSEEVNEKDTK_;_K(bi)DVIEQEIVSEEVNEKDTK_;_K(bi)DVIEQEIVSEEVNEKDTK_;_K(bi)DVIEQEIVSEEVNEKDTK_;_K(bi)DVIEQEIVSEEVNEKDTK_;_K(bi)DVI…	1156	NA	0.649127	0.0808627	-0.144239	0.571506	0.0743459	-0.301478	26.7066	27.43	26.4641	26.634	26.745	26.789	21.9167	23.2294	21.6794	21.9535	22.1336	21.834
PF3D7_0500800	Plasmodium falciparum 3D7	mature parasite-infected erythrocyte surface antigen	MESA	Biotin (K)	0	1	3	KDVIEQEIVSEEVNEKDTKNNDK	_K(bi)DVIEQEIVSEEVNEKDTKNNDK_;_K(bi)DVIEQEIVSEEVNEKDTKNNDK_;_K(bi)DVIEQEIVSEEVNEKDTKNNDK_	1156	NA	NA	NA	NA	NA	NA	NA	NA	NA	NA	NA	NA	NA	NA	NA	NA	NA	NA	NA
PF3D7_0500800	Plasmodium falciparum 3D7	mature parasite-infected erythrocyte surface antigen	MESA	Biotin (K)	0	1	3	KGIKENDTEGNDKVK	_KGIKENDTEGNDK(bi)VK_;_KGIKENDTEGNDK(bi)VK_;_KGIKENDTEGNDK(bi)VK_;_KGIKENDTEGNDK(bi)VK_;_KGIKENDTEGNDK(bi)VK_;_KGIKENDTEGNDK(bi)VK_;_KGIKENDTEGNDK(bi)VK_;_KGIKENDTEGNDK(bi)VK_;_KGIKENDTEGNDKVK(bi)_;_KGIKENDTEGNDK(bi)VK_;_KGIKENDTEGNDK(bi)VK_;_KGIKENDTEGNDK(bi)VK_;_KGIKENDTEGNDK(bi)VK_;_KGIKENDTEGNDK(bi)VK_;_KGIKENDTEGNDK(bi)VK_;_KGIKENDTEGNDK(bi)VK_;_KGIKENDTEGNDK(bi)VK_;_KGIKENDTEGNDK(bi)VK_;_KG…	584;586	NA	0.343569	0.206221	-0.328339	0.591429	0.0664682	-0.286921	22.7639	22.9871	23.0026	22.0087	22.7801	22.9796	21.0468	21.3913	20.7979	20.5885	20.1137	21.673
PF3D7_0500800	Plasmodium falciparum 3D7	mature parasite-infected erythrocyte surface antigen	MESA	Biotin (K);Oxidation (M)	0	1	1	KHVNVMGESK	_K(bi)HVNVM(ox)GESK_;_K(bi)HVNVM(ox)GESK_;_K(bi)HVNVM(ox)GESK_;_K(bi)HVNVM(ox)GESK_;_K(bi)HVNVM(ox)GESK_;_K(bi)HVNVM(ox)GESK_;_K(bi)HVNVM(ox)GESK_;_K(bi)HVNVM(ox)GESK_;_K(bi)HVNVM(ox)GESK_;_K(bi)HVNVM(ox)GESK_;_K(bi)HVNVM(ox)GESK_;_K(bi)HVNVM(ox)GESK_;_K(bi)HVNVM(ox)GESK_;_K(bi)HVNVM(ox)GESK_;_K(bi)HVNVM(ox)GESK_;_K(bi)HVNVM(ox)GESK_;_K(bi)HVNVM(ox)GESK_;_K(bi)HVNVM(ox)GESK_;_K(bi)HVNVM(ox)GESK_;…	199	NA	0.576852	0.103676	-0.178352	0.622895	0.0612227	-0.0788581	24.0736	24.4152	24.5997	23.7917	24.1118	24.6499	22.8971	23.1179	22.9949	22.6761	22.9623	23.1348
PF3D7_0500800	Plasmodium falciparum 3D7	mature parasite-infected erythrocyte surface antigen	MESA	Biotin (K)	0	1	1	KHVNVMGESK	_K(bi)HVNVM(ox)GESK_;_K(bi)HVNVM(ox)GESK_;_K(bi)HVNVM(ox)GESK_;_K(bi)HVNVM(ox)GESK_;_K(bi)HVNVM(ox)GESK_;_K(bi)HVNVM(ox)GESK_;_K(bi)HVNVM(ox)GESK_;_K(bi)HVNVM(ox)GESK_;_K(bi)HVNVM(ox)GESK_;_K(bi)HVNVM(ox)GESK_;_K(bi)HVNVM(ox)GESK_;_K(bi)HVNVM(ox)GESK_;_K(bi)HVNVM(ox)GESK_;_K(bi)HVNVM(ox)GESK_;_K(bi)HVNVM(ox)GESK_;_K(bi)HVNVM(ox)GESK_;_K(bi)HVNVM(ox)GESK_;_K(bi)HVNVM(ox)GESK_;_K(bi)HVNVM(ox)GESK_;…	199	NA	0.0164973	0.846595	-0.459542	0.631219	0.0612227	-0.105418	26.9984	26.8812	26.6681	26.3298	26.3227	26.5166	24.4305	24.9508	24.6695	24.3284	24.6071	24.799
PF3D7_0500800	Plasmodium falciparum 3D7	mature parasite-infected erythrocyte surface antigen	MESA	Biotin (K)	0	1	2	KHVNVMGESKETDESK	_K(bi)HVNVMGESKETDESK_	199	NA	NA	NA	NA	NA	NA	NA	NA	NA	NA	NA	NA	NA	NA	NA	NA	NA	NA	NA
PF3D7_0500800	Plasmodium falciparum 3D7	mature parasite-infected erythrocyte surface antigen	MESA	Biotin (K)	0	1	3	KKEKEYLMK	_KK(bi)EKEYLMK_;_KK(bi)EKEYLMK_;_KK(bi)EKEYLMK_	162	NA	NA	NA	NA	NA	NA	NA	NA	NA	NA	NA	NA	NA	NA	NA	NA	NA	NA	NA
PF3D7_0500800	Plasmodium falciparum 3D7	mature parasite-infected erythrocyte surface antigen	MESA	Biotin (K)	0	1	3	KKHKFLR	_KKHK(bi)FLR_;_KKHK(bi)FLR_;_KKHK(bi)FLR_;_KKHK(bi)FLR_;_KKHK(bi)FLR_;_KKHK(bi)FLR_	466	NA	0.00530007	1.10311	0.458564	NA	NA	NA	19.4642	19.3629	19.5859	19.9569	20.004	19.8277	NA	NA	NA	NA	NA	NA
PF3D7_0500800	Plasmodium falciparum 3D7	mature parasite-infected erythrocyte surface antigen	MESA	Biotin (K)	0	1	3	KKVEKGIK	_KKVEK(bi)GIK_;_KKVEK(bi)GIK_;_KKVEK(bi)GIK_;_KKVEK(bi)GIK_;_KKVEK(bi)GIK_;_KKVEK(bi)GIK_	787	NA	0.332473	0.217418	-1.41404	NA	NA	NA	20.5621	20.0349	20.5253	16.472	19.7418	20.6664	NA	NA	NA	NA	NA	NA
PF3D7_0500800	Plasmodium falciparum 3D7	mature parasite-infected erythrocyte surface antigen	MESA	Biotin (K)	0	1	2	KPIDDCKK	_K(bi)PIDDCKK_;_K(bi)PIDDCKK_;_K(bi)PIDDCKK_;_K(bi)PIDDCKK_;_K(bi)PIDDCKK_;_K(bi)PIDDCKK_;_K(bi)PIDDCKK_;_K(bi)PIDDCKK_;_K(bi)PIDDCKK_	1186	NA	0.573722	0.104017	-0.179046	NA	NA	NA	22.3134	21.5406	21.7235	21.6492	21.3905	22.0008	NA	NA	NA	NA	NA	NA
PF3D7_0500800	Plasmodium falciparum 3D7	mature parasite-infected erythrocyte surface antigen	MESA	Biotin (K)	0	1	3	KPIDDCKKER	_K(bi)PIDDCKKER_;_K(bi)PIDDCKKER_;_K(bi)PIDDCKKER_;_K(bi)PIDDCKKER_	1186	NA	NA	NA	NA	NA	NA	NA	NA	NA	NA	NA	NA	NA	NA	NA	NA	NA	NA	NA
PF3D7_0500800	Plasmodium falciparum 3D7	mature parasite-infected erythrocyte surface antigen	MESA	Biotin (K)	0	1	1	KSFFQMLGCNFLCNK	_K(bi)SFFQMLGCNFLCNK_;_K(bi)SFFQMLGCNFLCNK_	430	NA	NA	NA	NA	NA	NA	NA	NA	NA	NA	NA	NA	NA	NA	NA	NA	NA	NA	NA
PF3D7_0500800	Plasmodium falciparum 3D7	mature parasite-infected erythrocyte surface antigen	MESA	Biotin (K)	0	1	3	KVEKGIKENHTESK	_KVEK(bi)GIKENHTESK_;_KVEK(bi)GIKENHTESK_;_KVEK(bi)GIKENHTESK_;_KVEK(bi)GIKENHTESK_;_KVEK(bi)GIKENHTESK_	787	NA	0.0674082	0.571829	-0.35963	NA	NA	NA	18.701	18.7852	19.1688	18.5437	18.5071	18.5254	NA	NA	NA	NA	NA	NA
PF3D7_0500800	Plasmodium falciparum 3D7	mature parasite-infected erythrocyte surface antigen	MESA	Biotin (K)	0	1	2	KYNNGELEEYYKEK	_K(bi)YNNGELEEYYKEK_;_K(bi)YNNGELEEYYKEK_;_K(bi)YNNGELEEYYKEK_;_K(bi)YNNGELEEYYKEK_;_K(bi)YNNGELEEYYKEK_;_K(bi)YNNGELEEYYKEK_;_K(bi)YNNGELEEYYKEK_	1289	NA	0.000599466	1.60307	-0.484819	NA	NA	NA	22.2756	22.1957	22.1443	21.7301	21.7689	21.6622	NA	NA	NA	NA	NA	NA
PF3D7_0500800	Plasmodium falciparum 3D7	mature parasite-infected erythrocyte surface antigen	MESA	Biotin (K)	0	1	3	KYNNGELEEYYKEKQNEEYFDEEYIIQSK	_KYNNGELEEYYKEK(bi)QNEEYFDEEYIIQSK_;_K(bi)YNNGELEEYYKEKQNEEYFDEEYIIQSK_;_KYNNGELEEYYKEK(bi)QNEEYFDEEYIIQSK_;_KYNNGELEEYYKEK(bi)QNEEYFDEEYIIQSK_;_KYNNGELEEYYK(bi)EKQNEEYFDEEYIIQSK_;_KYNNGELEEYYK(bi)EKQNEEYFDEEYIIQSK_;_KYNNGELEEYYKEK(bi)QNEEYFDEEYIIQSK_	1302;1289;1300	NA	0.783062	0.0447459	0.130094	NA	NA	NA	25.6062	25.5292	24.2883	25.415	25.3513	25.0477	NA	NA	NA	NA	NA	NA
PF3D7_0500800	Plasmodium falciparum 3D7	mature parasite-infected erythrocyte surface antigen	MESA	Biotin (K)	0	1	1	MIGKEVIIEEVK	_MIGK(bi)EVIIEEVK_;_MIGK(bi)EVIIEEVK_;_MIGK(bi)EVIIEEVK_;_MIGK(bi)EVIIEEVK_;_MIGK(bi)EVIIEEVK_;_MIGK(bi)EVIIEEVK_;_MIGK(bi)EVIIEEVK_	1123	NA	NA	NA	NA	NA	NA	NA	NA	NA	NA	NA	NA	NA	NA	NA	NA	NA	NA	NA
PF3D7_0500800	Plasmodium falciparum 3D7	mature parasite-infected erythrocyte surface antigen	MESA	Biotin (K);Oxidation (M)	0	1	2	MIGKEVIIEEVKEEVK	_M(ox)IGK(bi)EVIIEEVKEEVK_;_M(ox)IGK(bi)EVIIEEVKEEVK_;_M(ox)IGK(bi)EVIIEEVKEEVK_;_M(ox)IGK(bi)EVIIEEVKEEVK_;_M(ox)IGK(bi)EVIIEEVKEEVK_;_M(ox)IGK(bi)EVIIEEVKEEVK_;_M(ox)IGK(bi)EVIIEEVKEEVK_;_M(ox)IGK(bi)EVIIEEVKEEVK_;_M(ox)IGK(bi)EVIIEEVKEEVK_;_M(ox)IGK(bi)EVIIEEVKEEVK_;_M(ox)IGK(bi)EVIIEEVKEEVK_;_M(ox)IGK(bi)EVIIEEVKEEVK_;_M(ox)IGK(bi)EVIIEEVKEEVK_;_M(ox)IGK(bi)EVIIEEVKEEVK_;_M(ox)IGK(bi)EVIIEEVK…	1123	NA	0.762786	0.0447459	-0.157182	0.294098	0.153399	0.203802	25.2375	26.6062	25.4849	25.2203	25.5761	26.0607	23.7716	23.2413	23.463	23.6214	23.8355	23.6303
PF3D7_0500800	Plasmodium falciparum 3D7	mature parasite-infected erythrocyte surface antigen	MESA	Biotin (K)	0	1	2	MIGKEVIIEEVKEEVK	_M(ox)IGK(bi)EVIIEEVKEEVK_;_M(ox)IGK(bi)EVIIEEVKEEVK_;_M(ox)IGK(bi)EVIIEEVKEEVK_;_M(ox)IGK(bi)EVIIEEVKEEVK_;_M(ox)IGK(bi)EVIIEEVKEEVK_;_M(ox)IGK(bi)EVIIEEVKEEVK_;_M(ox)IGK(bi)EVIIEEVKEEVK_;_M(ox)IGK(bi)EVIIEEVKEEVK_;_M(ox)IGK(bi)EVIIEEVKEEVK_;_M(ox)IGK(bi)EVIIEEVKEEVK_;_M(ox)IGK(bi)EVIIEEVKEEVK_;_M(ox)IGK(bi)EVIIEEVKEEVK_;_M(ox)IGK(bi)EVIIEEVKEEVK_;_M(ox)IGK(bi)EVIIEEVKEEVK_;_M(ox)IGK(bi)EVIIEEVK…	1123	NA	0.593135	0.0990404	-0.326932	0.25201	0.167984	0.240475	27.3485	27.6559	25.9815	26.3423	26.5492	27.1135	24.8196	24.5489	24.3625	24.6267	24.783	25.0426
PF3D7_0500800	Plasmodium falciparum 3D7	mature parasite-infected erythrocyte surface antigen	MESA	Biotin (K);Oxidation (M)	0	1	3	MIGKEVIIEEVKEEVKK	_M(ox)IGK(bi)EVIIEEVKEEVKK_;_M(ox)IGK(bi)EVIIEEVKEEVKK_;_M(ox)IGK(bi)EVIIEEVKEEVKK_;_M(ox)IGK(bi)EVIIEEVKEEVKK_;_M(ox)IGK(bi)EVIIEEVKEEVKK_;_M(ox)IGK(bi)EVIIEEVKEEVKK_;_M(ox)IGK(bi)EVIIEEVKEEVKK_;_M(ox)IGK(bi)EVIIEEVKEEVKK_;_M(ox)IGK(bi)EVIIEEVKEEVKK_;_M(ox)IGK(bi)EVIIEEVKEEVKK_;_M(ox)IGK(bi)EVIIEEVKEEVKK_;_M(ox)IGK(bi)EVIIEEVKEEVKK_;_M(ox)IGK(bi)EVIIEEVKEEVKK_;_M(ox)IGK(bi)EVIIEEVKEEVKK_;_M(ox)I…	1123	NA	0.9303	0.0165895	0.0414811	0.745553	0.0432505	-0.0957068	24.7215	26.1222	25.3092	25.0872	25.7167	25.4735	22.8868	23.0787	22.1741	22.6256	22.6094	22.6175
PF3D7_0500800	Plasmodium falciparum 3D7	mature parasite-infected erythrocyte surface antigen	MESA	Biotin (K)	0	1	3	MIGKEVIIEEVKEEVKK	_M(ox)IGK(bi)EVIIEEVKEEVKK_;_M(ox)IGK(bi)EVIIEEVKEEVKK_;_M(ox)IGK(bi)EVIIEEVKEEVKK_;_M(ox)IGK(bi)EVIIEEVKEEVKK_;_M(ox)IGK(bi)EVIIEEVKEEVKK_;_M(ox)IGK(bi)EVIIEEVKEEVKK_;_M(ox)IGK(bi)EVIIEEVKEEVKK_;_M(ox)IGK(bi)EVIIEEVKEEVKK_;_M(ox)IGK(bi)EVIIEEVKEEVKK_;_M(ox)IGK(bi)EVIIEEVKEEVKK_;_M(ox)IGK(bi)EVIIEEVKEEVKK_;_M(ox)IGK(bi)EVIIEEVKEEVKK_;_M(ox)IGK(bi)EVIIEEVKEEVKK_;_M(ox)IGK(bi)EVIIEEVKEEVKK_;_M(ox)I…	1123	NA	0.993025	0.00117174	0.00477111	0.457812	0.102078	-0.152501	27.0678	27.6418	25.9182	26.7227	26.9363	26.9832	24.5805	24.004	24.2783	23.9769	24.1738	24.2545
PF3D7_0500800	Plasmodium falciparum 3D7	mature parasite-infected erythrocyte surface antigen	MESA	Biotin (K)	0	1	1	NAPYIDDPLWGSVVTDKR	_NAPYIDDPLWGSVVTDK(bi)R_;_NAPYIDDPLWGSVVTDK(bi)R_;_NAPYIDDPLWGSVVTDK(bi)R_	126	NA	NA	NA	NA	NA	NA	NA	NA	NA	NA	NA	NA	NA	NA	NA	NA	NA	NA	NA
PF3D7_0500800	Plasmodium falciparum 3D7	mature parasite-infected erythrocyte surface antigen	MESA	Biotin (K)	0	1	3	NDGKKDKVIGSEK	_NDGKKDK(bi)VIGSEK_;_NDGKKDK(bi)VIGSEK_;_NDGKKDK(bi)VIGSEK_;_NDGKKDK(bi)VIGSEK_;_NDGKKDK(bi)VIGSEK_;_NDGKKDK(bi)VIGSEK_	543	NA	0.744323	0.0507279	-0.0683322	NA	NA	NA	22.0077	21.6862	21.7485	21.6134	21.5429	22.0812	NA	NA	NA	NA	NA	NA
PF3D7_0500800	Plasmodium falciparum 3D7	mature parasite-infected erythrocyte surface antigen	MESA	Biotin (K)	0	1	3	NERKDVIEQEIVSEEVNEKDTK	_NERK(bi)DVIEQEIVSEEVNEKDTK_;_NERK(bi)DVIEQEIVSEEVNEKDTK_;_NERK(bi)DVIEQEIVSEEVNEKDTK_;_NERK(bi)DVIEQEIVSEEVNEKDTK_;_NERK(bi)DVIEQEIVSEEVNEKDTK_;_NERK(bi)DVIEQEIVSEEVNEKDTK_;_NERK(bi)DVIEQEIVSEEVNEKDTK_	1156	NA	0.564369	0.106653	-0.169899	NA	NA	NA	22.1526	22.9857	22.3509	22.1518	22.5012	22.3265	NA	NA	NA	NA	NA	NA
PF3D7_0500800	Plasmodium falciparum 3D7	mature parasite-infected erythrocyte surface antigen	MESA	Biotin (K)	0	1	1	NNCLQHIKLLEMQESER	_NNCLQHIK(bi)LLEMQESER_;_NNCLQHIK(bi)LLEMQESER_;_NNCLQHIK(bi)LLEMQESER_;_NNCLQHIK(bi)LLEMQESER_;_NNCLQHIK(bi)LLEMQESER_;_NNCLQHIK(bi)LLEMQESER_;_NNCLQHIK(bi)LLEMQESER_	135	NA	0.322189	0.223523	0.228461	NA	NA	NA	22.7314	22.4395	22.2152	22.9568	22.6099	22.5048	NA	NA	NA	NA	NA	NA
PF3D7_0500800	Plasmodium falciparum 3D7	mature parasite-infected erythrocyte surface antigen	MESA	Biotin (K)	0	1	3	NNKNERKDNVIGK	_NNKNERK(bi)DNVIGK_;_NNKNERK(bi)DNVIGK_;_NNKNERK(bi)DNVIGK_;_NNKNERK(bi)DNVIGK_;_NNKNERK(bi)DNVIGK_;_NNKNERK(bi)DNVIGK_;_NNKNERK(bi)DNVIGK_;_NNKNERK(bi)DNVIGK_;_NNKNERK(bi)DNVIGK_;_NNKNERK(bi)DNVIGK_;_NNKNERK(bi)DNVIGK_;_NNKNERK(bi)DNVIGK_	885	NA	0.102235	0.49571	0.862841	NA	NA	NA	20.7583	20.5164	21.5917	22.0879	22.0412	21.3259	NA	NA	NA	NA	NA	NA
PF3D7_0500800	Plasmodium falciparum 3D7	mature parasite-infected erythrocyte surface antigen	MESA	2 Biotin (K)	0	2	2	QKAELDKK	_QK(bi)AELDKK_;_QK(bi)AELDKK_;_QK(bi)AELDKK_;_QK(bi)AELDKK_;_QK(bi)AELDKK_;_QKAELDK(bi)K_;_QK(bi)AELDKK_;_QKAELDK(bi)K_;_QK(bi)AELDKK_;_QKAELDK(bi)K_;_QK(bi)AELDKK_;_QKAELDK(bi)K_;_QK(bi)AELDKK_;_QK(bi)AELDKK_;_QK(bi)AELDKK_;_QK(bi)AELDKK_;_QK(bi)AELDKK_;_QK(bi)AELDKK_;_QK(bi)AELDKK_;_QK(bi)AELDKK_;_QK(bi)AELDKK_;_QK(bi)AELDKK_;_QK(bi)AELDKK_;_QK(bi)AELDKK_;_QK(bi)AELDKK_;_QK(bi)AELDKK_;_QK(bi)AE…	1373;1378	NA	0.0768372	0.546413	0.331254	NA	NA	NA	21.939	21.8513	21.9823	21.9931	22.3364	22.4369	NA	NA	NA	NA	NA	NA
PF3D7_0500800	Plasmodium falciparum 3D7	mature parasite-infected erythrocyte surface antigen	MESA	Biotin (K)	0	1	2	QKAELDKK	_QK(bi)AELDKK_;_QK(bi)AELDKK_;_QK(bi)AELDKK_;_QK(bi)AELDKK_;_QK(bi)AELDKK_;_QKAELDK(bi)K_;_QK(bi)AELDKK_;_QKAELDK(bi)K_;_QK(bi)AELDKK_;_QKAELDK(bi)K_;_QK(bi)AELDKK_;_QKAELDK(bi)K_;_QK(bi)AELDKK_;_QK(bi)AELDKK_;_QK(bi)AELDKK_;_QK(bi)AELDKK_;_QK(bi)AELDKK_;_QK(bi)AELDKK_;_QK(bi)AELDKK_;_QK(bi)AELDKK_;_QK(bi)AELDKK_;_QK(bi)AELDKK_;_QK(bi)AELDKK_;_QK(bi)AELDKK_;_QK(bi)AELDKK_;_QK(bi)AELDKK_;_QK(bi)AE…	1373;1378	NA	0.884073	0.0273928	0.0263311	0.265437	0.160397	0.484525	25.9233	25.6572	25.9114	25.6839	25.7407	26.1463	21.781	23.0384	22.5676	22.9315	22.8238	23.0853
PF3D7_0500800	Plasmodium falciparum 3D7	mature parasite-infected erythrocyte surface antigen	MESA	Biotin (K)	0	1	3	QKAELDKKFSEMNVVHQILNYEER	_QK(bi)AELDKKFSEMNVVHQILNYEER_;_QK(bi)AELDKKFSEMNVVHQILNYEER_	1373	NA	NA	NA	NA	NA	NA	NA	NA	NA	NA	NA	NA	NA	NA	NA	NA	NA	NA	NA
PF3D7_0500800	Plasmodium falciparum 3D7	mature parasite-infected erythrocyte surface antigen	MESA	Biotin (K)	0	1	2	QNEEYFDEEYIIQSKEHNTLNTFPNMALNEDFRR	_QNEEYFDEEYIIQSK(bi)EHNTLNTFPNMALNEDFRR_;_QNEEYFDEEYIIQSK(bi)EHNTLNTFPNMALNEDFRR_;_QNEEYFDEEYIIQSK(bi)EHNTLNTFPNMALNEDFRR_;_QNEEYFDEEYIIQSK(bi)EHNTLNTFPNMALNEDFRR_;_QNEEYFDEEYIIQSK(bi)EHNTLNTFPNMALNEDFRR_;_QNEEYFDEEYIIQSK(bi)EHNTLNTFPNMALNEDFRR_;_QNEEYFDEEYIIQSK(bi)EHNTLNTFPNMALNEDFRR_;_QNEEYFDEEYIIQSK(bi)EHNTLNTFPNMALNEDFRR_;_QNEEYFDEEYIIQSK(bi)EHNTLNTFPNMALNEDFRR_;_QNEEYFDEEYIIQSK(bi)EHNTLNTFPN…	1317	NA	0.38941	0.180855	0.546788	NA	NA	NA	23.9446	23.9714	22.3668	24.2067	23.5761	24.1402	NA	NA	NA	NA	NA	NA
PF3D7_0500800	Plasmodium falciparum 3D7	mature parasite-infected erythrocyte surface antigen	MESA	Biotin (K);Oxidation (M)	0	1	2	QNEEYFDEEYIIQSKEHNTLNTFPNMALNEDFRR	_QNEEYFDEEYIIQSK(bi)EHNTLNTFPNMALNEDFRR_;_QNEEYFDEEYIIQSK(bi)EHNTLNTFPNMALNEDFRR_;_QNEEYFDEEYIIQSK(bi)EHNTLNTFPNMALNEDFRR_;_QNEEYFDEEYIIQSK(bi)EHNTLNTFPNMALNEDFRR_;_QNEEYFDEEYIIQSK(bi)EHNTLNTFPNMALNEDFRR_;_QNEEYFDEEYIIQSK(bi)EHNTLNTFPNMALNEDFRR_;_QNEEYFDEEYIIQSK(bi)EHNTLNTFPNMALNEDFRR_;_QNEEYFDEEYIIQSK(bi)EHNTLNTFPNMALNEDFRR_;_QNEEYFDEEYIIQSK(bi)EHNTLNTFPNMALNEDFRR_;_QNEEYFDEEYIIQSK(bi)EHNTLNTFPN…	1317	NA	NA	NA	NA	NA	NA	NA	NA	NA	NA	NA	NA	NA	NA	NA	NA	NA	NA	NA
PF3D7_0500800	Plasmodium falciparum 3D7	mature parasite-infected erythrocyte surface antigen	MESA	Biotin (K)	0	1	2	QVEDGIKENDTEGNDKVK	_QVEDGIKENDTEGNDK(bi)VK_;_QVEDGIKENDTEGNDK(bi)VK_;_QVEDGIKENDTEGNDK(bi)VK_;_QVEDGIKENDTEGNDK(bi)VK_;_QVEDGIKENDTEGNDK(bi)VK_;_QVEDGIKENDTEGNDKVK(bi)_;_QVEDGIKENDTEGNDKVK(bi)_;_QVEDGIKENDTEGNDKVK(bi)_	617;619	NA	NA	NA	NA	0.348855	0.133818	-0.481887	NA	NA	NA	NA	NA	NA	19.8189	20.4824	19.49	18.7599	19.6998	19.8859
PF3D7_0500800	Plasmodium falciparum 3D7	mature parasite-infected erythrocyte surface antigen	MESA	Biotin (K)	0	1	2	QVEEGIKENDTEGNDKVK	_QVEEGIKENDTEGNDKVK(bi)_;_QVEEGIKENDTEGNDKVK(bi)_;_QVEEGIKENDTEGNDK(bi)VK_;_QVEEGIKENDTEGNDK(bi)VK_;_QVEEGIKENDTEGNDK(bi)VK_;_QVEEGIKENDTEGNDK(bi)VK_	652;650	NA	0.20962	0.318105	-0.602136	NA	NA	NA	20.9043	21.2221	20.944	19.6402	20.8072	20.8167	NA	NA	NA	NA	NA	NA
PF3D7_0500800	Plasmodium falciparum 3D7	mature parasite-infected erythrocyte surface antigen	MESA	Biotin (K)	0	1	2	QVEEGIKENDTESKDK	_QVEEGIKENDTESKDK(bi)_;_QVEEGIKENDTESK(bi)DK_;_QVEEGIKENDTESKDK(bi)_;_QVEEGIKENDTESKDK(bi)_;_QVEEGIKENDTESK(bi)DK_;_QVEEGIKENDTESKDK(bi)_;_QVEEGIKENDTESKDK(bi)_	683;832;681;830	NA	0.0501872	0.624135	-0.627282	NA	NA	NA	19.3971	19.6214	19.5093	18.4637	18.9926	19.1897	NA	NA	NA	NA	NA	NA
PF3D7_0500800	Plasmodium falciparum 3D7	mature parasite-infected erythrocyte surface antigen	MESA	Biotin (K)	0	1	3	QVEEGIKENDTESKDKLIGQEIITEEVK	_QVEEGIKENDTESKDK(bi)LIGQEIITEEVK_;_QVEEGIKENDTESKDK(bi)LIGQEIITEEVK_;_QVEEGIKENDTESKDK(bi)LIGQEIITEEVK_;_QVEEGIK(bi)ENDTESKDKLIGQEIITEEVK_;_QVEEGIKENDTESKDK(bi)LIGQEIITEEVK_;_QVEEGIKENDTESKDK(bi)LIGQEIITEEVK_;_QVEEGIKENDTESKDK(bi)LIGQEIITEEVK_;_QVEEGIKENDTESKDK(bi)LIGQEIITEEVK_;_QVEEGIK(bi)ENDTESKDKLIGQEIITEEVK_;_QVEEGIK(bi)ENDTESKDKLIGQEIITEEVK_;_QVEEGIKENDTESKDK(bi)LIGQEIITEEVK_;_QVEEGIK(bi)EN…	683;674	NA	0.259044	0.273117	-0.732422	NA	NA	NA	24.4336	24.8644	23.2173	23.1958	23.1643	23.958	NA	NA	NA	NA	NA	NA
PF3D7_0500800	Plasmodium falciparum 3D7	mature parasite-infected erythrocyte surface antigen	MESA	Biotin (K)	0	1	3	RKQQEEENAKDIEEIR	_RKQQEEENAK(bi)DIEEIR_;_RKQQEEENAK(bi)DIEEIR_;_RKQQEEENAK(bi)DIEEIR_;_RKQQEEENAK(bi)DIEEIR_;_RKQQEEENAK(bi)DIEEIR_	154	NA	0.707083	0.0615814	0.141771	NA	NA	NA	20.5757	20.8843	20.2575	20.7143	20.193	21.2355	NA	NA	NA	NA	NA	NA
PF3D7_0500800	Plasmodium falciparum 3D7	mature parasite-infected erythrocyte surface antigen	MESA	Biotin (K)	0	1	3	RVNKEVNKR	_RVNKEVNK(bi)R_;_RVNK(bi)EVNKR_;_RVNK(bi)EVNKR_;_RVNKEVNK(bi)R_;_RVNKEVNK(bi)R_;_RVNK(bi)EVNKR_;_RVNKEVNK(bi)R_;_RVNK(bi)EVNKR_;_RVNK(bi)EVNKR_;_RVNK(bi)EVNKR_;_RVNKEVNK(bi)R_	1144;1140	NA	0.119436	0.456421	0.485288	NA	NA	NA	20.8809	20.2953	20.9507	21.0667	21.0598	21.4563	NA	NA	NA	NA	NA	NA
PF3D7_0500800	Plasmodium falciparum 3D7	mature parasite-infected erythrocyte surface antigen	MESA	Biotin (K)	0	1	2	VIGQEVIKGDVNEEGPENKDK	_VIGQEVIK(bi)GDVNEEGPENKDK_;_VIGQEVIK(bi)GDVNEEGPENKDK_;_VIGQEVIK(bi)GDVNEEGPENKDK_;_VIGQEVIK(bi)GDVNEEGPENKDK_;_VIGQEVIK(bi)GDVNEEGPENKDK_;_VIGQEVIK(bi)GDVNEEGPENKDK_;_VIGQEVIK(bi)GDVNEEGPENKDK_	840	NA	0.0162136	0.850899	-0.689479	NA	NA	NA	21.8578	21.9237	21.4246	20.9198	21.172	21.0459	NA	NA	NA	NA	NA	NA
PF3D7_0500800	Plasmodium falciparum 3D7	mature parasite-infected erythrocyte surface antigen	MESA	Biotin (K)	0	1	3	VIGQEVIKGDVNEEGPENKDKVTK	_VIGQEVIK(bi)GDVNEEGPENKDKVTK_;_VIGQEVIK(bi)GDVNEEGPENKDKVTK_;_VIGQEVIK(bi)GDVNEEGPENKDKVTK_;_VIGQEVIK(bi)GDVNEEGPENKDKVTK_;_VIGQEVIK(bi)GDVNEEGPENKDKVTK_;_VIGQEVIK(bi)GDVNEEGPENKDKVTK_	840	NA	0.254222	0.27974	-0.268766	NA	NA	NA	22.4112	22.462	21.8352	21.9605	21.9357	22.006	NA	NA	NA	NA	NA	NA
PF3D7_0500800	Plasmodium falciparum 3D7	mature parasite-infected erythrocyte surface antigen	MESA	Biotin (K)	0	1	1	VIGSEKTQK	_VIGSEK(bi)TQK_;_VIGSEK(bi)TQK_;_VIGSEK(bi)TQK_;_VIGSEK(bi)TQK_;_VIGSEK(bi)TQK_;_VIGSEK(bi)TQK_	549	NA	0.0484705	0.630214	-0.506606	NA	NA	NA	21.4266	21.4553	21.1422	20.6168	20.7644	21.123	NA	NA	NA	NA	NA	NA
PF3D7_0500800	Plasmodium falciparum 3D7	mature parasite-infected erythrocyte surface antigen	MESA	Biotin (K)	0	1	2	VIGSEKTQKEIK	_VIGSEK(bi)TQKEIK_;_VIGSEK(bi)TQKEIK_;_VIGSEK(bi)TQKEIK_;_VIGSEK(bi)TQKEIK_;_VIGSEK(bi)TQKEIK_;_VIGSEK(bi)TQKEIK_	549	NA	0.823552	0.0362672	0.0359144	NA	NA	NA	21.1156	20.9161	20.8156	21.2262	20.8278	20.9011	NA	NA	NA	NA	NA	NA
PF3D7_0500800	Plasmodium falciparum 3D7	mature parasite-infected erythrocyte surface antigen	MESA	Biotin (K)	0	1	3	VIGSEKTQKEIKEK	_VIGSEKTQK(bi)EIKEK_;_VIGSEKTQK(bi)EIKEK_;_VIGSEKTQK(bi)EIKEK_	552	NA	NA	NA	NA	NA	NA	NA	NA	NA	NA	NA	NA	NA	NA	NA	NA	NA	NA	NA
PF3D7_0500800	Plasmodium falciparum 3D7	mature parasite-infected erythrocyte surface antigen	MESA	Biotin (K)	0	1	3	VKEVKKEVK	_VK(bi)EVKKEVK_;_VKEVKK(bi)EVK_	861;865	NA	NA	NA	NA	NA	NA	NA	NA	NA	NA	NA	NA	NA	NA	NA	NA	NA	NA	NA
PF3D7_0500800	Plasmodium falciparum 3D7	mature parasite-infected erythrocyte surface antigen	MESA	2 Biotin (K)	0	2	3	VKKPIDDCKK	_VKK(bi)PIDDCKK_;_VKK(bi)PIDDCKK_;_VKK(bi)PIDDCKK_;_VKK(bi)PIDDCKK_;_VKK(bi)PIDDCKK_;_VK(bi)KPIDDCKK_;_VKK(bi)PIDDCKK_;_VKK(bi)PIDDCKK_;_VK(bi)KPIDDCKK_;_VKK(bi)PIDDCKK_;_VKK(bi)PIDDCKK_;_VKKPIDDCK(bi)K_;_VKK(bi)PIDDCKK_;_VKK(bi)PIDDCKK_;_VKK(bi)PIDDCKK_;_VKK(bi)PIDDCKK_;_VKK(bi)PIDDCKK_;_VKK(bi)PIDDCKK_;_VKK(bi)PIDDCKK_;_VKK(bi)PIDDCKK_;_VKK(bi)PIDDCKK_;_VKK(bi)PIDDCKK_;_VK(bi)K(bi)PIDDCKK_;_VK(…	1186;1185;1192	NA	0.170404	0.365895	-0.217834	NA	NA	NA	21.6667	21.7914	21.7291	21.2897	21.52	21.724	NA	NA	NA	NA	NA	NA
PF3D7_0500800	Plasmodium falciparum 3D7	mature parasite-infected erythrocyte surface antigen	MESA	Biotin (K)	0	1	3	VKKPIDDCKK	_VKK(bi)PIDDCKK_;_VKK(bi)PIDDCKK_;_VKK(bi)PIDDCKK_;_VKK(bi)PIDDCKK_;_VKK(bi)PIDDCKK_;_VK(bi)KPIDDCKK_;_VKK(bi)PIDDCKK_;_VKK(bi)PIDDCKK_;_VK(bi)KPIDDCKK_;_VKK(bi)PIDDCKK_;_VKK(bi)PIDDCKK_;_VKKPIDDCK(bi)K_;_VKK(bi)PIDDCKK_;_VKK(bi)PIDDCKK_;_VKK(bi)PIDDCKK_;_VKK(bi)PIDDCKK_;_VKK(bi)PIDDCKK_;_VKK(bi)PIDDCKK_;_VKK(bi)PIDDCKK_;_VKK(bi)PIDDCKK_;_VKK(bi)PIDDCKK_;_VKK(bi)PIDDCKK_;_VK(bi)K(bi)PIDDCKK_;_VK(…	1186;1185;1192	NA	0.378347	0.183231	-0.142942	0.37266	0.13121	-0.204041	23.9446	23.8303	23.9182	23.5461	23.6968	24.0214	19.1397	19.3495	19.7346	19.0218	19.2039	19.386
PF3D7_0500800	Plasmodium falciparum 3D7	mature parasite-infected erythrocyte surface antigen	MESA	Biotin (K)	0	1	1	VNKEVNK	_VNK(bi)EVNK_;_VNK(bi)EVNK_;_VNK(bi)EVNK_;_VNK(bi)EVNK_;_VNK(bi)EVNK_;_VNK(bi)EVNK_	1140	NA	0.0167913	0.842128	0.511091	NA	NA	NA	19.4088	19.3583	19.6941	19.894	19.9541	20.1464	NA	NA	NA	NA	NA	NA
PF3D7_0500800	Plasmodium falciparum 3D7	mature parasite-infected erythrocyte surface antigen	MESA	Biotin (K)	0	1	2	VNKEVNKR	_VNKEVNK(bi)R_;_VNK(bi)EVNKR_;_VNK(bi)EVNKR_;_VNK(bi)EVNKR_;_VNK(bi)EVNKR_;_VNK(bi)EVNKR_;_VNK(bi)EVNKR_;_VNKEVNK(bi)R_;_VNKEVNK(bi)R_;_VNKEVNK(bi)R_;_VNKEVNK(bi)R_	1144;1140	NA	0.230746	0.300513	0.205104	NA	NA	NA	22.501	22.0668	22.4269	22.6219	22.5564	22.4317	NA	NA	NA	NA	NA	NA
PF3D7_0500800	Plasmodium falciparum 3D7	mature parasite-infected erythrocyte surface antigen	MESA	Biotin (K)	0	1	3	VTKQEKVKEVK	_VTKQEK(bi)VKEVK_;_VTKQEK(bi)VKEVK_	859	NA	NA	NA	NA	NA	NA	NA	NA	NA	NA	NA	NA	NA	NA	NA	NA	NA	NA	NA
PF3D7_0500800	Plasmodium falciparum 3D7	mature parasite-infected erythrocyte surface antigen	MESA	Biotin (K)	0	1	2	YNKITSEFRETENVK	_YNK(bi)ITSEFRETENVK_;_YNK(bi)ITSEFRETENVK_;_YNK(bi)ITSEFRETENVK_;_YNK(bi)ITSEFRETENVK_;_YNK(bi)ITSEFRETENVK_;_YNK(bi)ITSEFRETENVK_;_YNK(bi)ITSEFRETENVK_;_YNK(bi)ITSEFRETENVK_;_YNK(bi)ITSEFRETENVK_;_YNK(bi)ITSEFRETENVK_;_YNK(bi)ITSEFRETENVK_;_YNK(bi)ITSEFRETENVK_;_YNK(bi)ITSEFRETENVK_;_YNK(bi)ITSEFRETENVK_	316	NA	0.185862	0.345844	-0.458266	0.597896	0.0664682	0.0911049	24.8621	24.8053	24.5122	23.7697	24.357	24.6783	23.8248	23.4904	23.7168	23.9852	23.5517	23.7684
PF3D7_0500800	Plasmodium falciparum 3D7	mature parasite-infected erythrocyte surface antigen	MESA	Biotin (K)	0	1	2	YNNGELEEYYKEKQNEEYFDEEYIIQSK	_YNNGELEEYYK(bi)EKQNEEYFDEEYIIQSK_;_YNNGELEEYYK(bi)EKQNEEYFDEEYIIQSK_;_YNNGELEEYYKEK(bi)QNEEYFDEEYIIQSK_;_YNNGELEEYYK(bi)EKQNEEYFDEEYIIQSK_;_YNNGELEEYYK(bi)EKQNEEYFDEEYIIQSK_;_YNNGELEEYYK(bi)EKQNEEYFDEEYIIQSK_;_YNNGELEEYYKEK(bi)QNEEYFDEEYIIQSK_;_YNNGELEEYYKEK(bi)QNEEYFDEEYIIQSK_;_YNNGELEEYYK(bi)EKQNEEYFDEEYIIQSK_;_YNNGELEEYYKEK(bi)QNEEYFDEEYIIQSK_;_YNNGELEEYYKEK(bi)QNEEYFDEEYIIQSK_	1300;1302	NA	0.156749	0.387804	1.09315	NA	NA	NA	22.8373	24.517	22.5088	24.2761	24.3112	24.5553	NA	NA	NA	NA	NA	NA
PF3D7_0501100	Plasmodium falciparum 3D7	co-chaperone J domain protein JDP	HSP40	Biotin (K)	0	1	1	ESSKTDETDYYAVLGLTK	_ESSK(bi)TDETDYYAVLGLTK_;_ESSK(bi)TDETDYYAVLGLTK_;_ESSK(bi)TDETDYYAVLGLTK_;_ESSK(bi)TDETDYYAVLGLTK_	75	NA	NA	NA	NA	0.0253942	0.571282	1.63041	NA	NA	NA	NA	NA	NA	18.7087	18.8309	20.1028	20.8571	21.0892	20.5872
PF3D7_0501100	Plasmodium falciparum 3D7	co-chaperone J domain protein JDP	HSP40	Biotin (K)	0	1	2	WHPDKHLNDEDKVEAER	_WHPDK(bi)HLNDEDKVEAER_;_WHPDK(bi)HLNDEDKVEAER_;_WHPDK(bi)HLNDEDKVEAER_;_WHPDK(bi)HLNDEDKVEAER_;_WHPDK(bi)HLNDEDKVEAER_;_WHPDK(bi)HLNDEDKVEAER_;_WHPDK(bi)HLNDEDKVEAER_;_WHPDK(bi)HLNDEDKVEAER_;_WHPDK(bi)HLNDEDKVEAER_;_WHPDK(bi)HLNDEDKVEAER_;_WHPDK(bi)HLNDEDKVEAER_;_WHPDK(bi)HLNDEDKVEAER_;_WHPDK(bi)HLNDEDKVEAER_;_WHPDK(bi)HLNDEDKVEAER_	111	NA	NA	NA	NA	0.942113	0.0109965	0.0104219	NA	NA	NA	NA	NA	NA	23.1071	23.2413	23.1075	23.4166	23.0252	23.0453
PF3D7_0501100	Plasmodium falciparum 3D7	co-chaperone J domain protein JDP	HSP40	Biotin (K)	0	1	3	WHPDKHLNDEDKVEAERK	_WHPDK(bi)HLNDEDKVEAERK_;_WHPDK(bi)HLNDEDKVEAERK_;_WHPDK(bi)HLNDEDKVEAERK_;_WHPDK(bi)HLNDEDKVEAERK_;_WHPDK(bi)HLNDEDKVEAERK_;_WHPDK(bi)HLNDEDKVEAERK_	111	NA	NA	NA	NA	0.382893	0.128201	-0.111061	NA	NA	NA	NA	NA	NA	21.5608	21.7912	21.6163	21.4624	21.7242	21.4484
PF3D7_0501200	Plasmodium falciparum 3D7	parasite-infected erythrocyte surface protein	PIESP2	Biotin (K)	0	1	1	NTFNFLKHINHYK	_NTFNFLK(bi)HINHYK_;_NTFNFLK(bi)HINHYK_;_NTFNFLK(bi)HINHYK_;_NTFNFLK(bi)HINHYK_;_NTFNFLK(bi)HINHYK_;_NTFNFLK(bi)HINHYK_;_NTFNFLK(bi)HINHYK_;_NTFNFLK(bi)HINHYK_;_NTFNFLK(bi)HINHYK_;_NTFNFLK(bi)HINHYK_;_NTFNFLK(bi)HINHYK_;_NTFNFLK(bi)HINHYK_;_NTFNFLK(bi)HINHYK_;_NTFNFLK(bi)HINHYK_;_NTFNFLK(bi)HINHYK_;_NTFNFLK(bi)HINHYK_;_NTFNFLK(bi)HINHYK_;_NTFNFLK(bi)HINHYK_;_NTFNFLK(bi)HINHYK_;_NTFNFLK(bi)HINHYK_…	63	NA	0.785978	0.0447459	-0.0838456	0.0163181	0.685439	-0.236368	25.1849	24.6794	24.1903	24.5802	24.5615	24.6613	25.9737	25.7943	25.9622	25.6862	25.6487	25.6862
PF3D7_0501200	Plasmodium falciparum 3D7	parasite-infected erythrocyte surface protein	PIESP2	Biotin (K)	0	1	2	NTFNFLKHINHYKNEQDTNNTHTPNHDEYSHNLPK	_NTFNFLKHINHYK(bi)NEQDTNNTHTPNHDEYSHNLPK_;_NTFNFLKHINHYK(bi)NEQDTNNTHTPNHDEYSHNLPK_;_NTFNFLK(bi)HINHYKNEQDTNNTHTPNHDEYSHNLPK_;_NTFNFLKHINHYK(bi)NEQDTNNTHTPNHDEYSHNLPK_;_NTFNFLKHINHYK(bi)NEQDTNNTHTPNHDEYSHNLPK_;_NTFNFLKHINHYK(bi)NEQDTNNTHTPNHDEYSHNLPK_;_NTFNFLKHINHYK(bi)NEQDTNNTHTPNHDEYSHNLPK_;_NTFNFLK(bi)HINHYKNEQDTNNTHTPNHDEYSHNLPK_;_NTFNFLK(bi)HINHYKNEQDTNNTHTPNHDEYSHNLPK_;_NTFNFLKHINHYK(bi)NEQ…	69;63	NA	0.0971775	0.502642	0.308491	0.104565	0.30554	-0.438891	24.4396	24.5292	24.2015	24.8937	24.6653	24.5368	25.267	24.7028	24.8287	24.6425	24.2531	24.5863
PF3D7_0501300	Plasmodium falciparum 3D7	skeleton-binding protein 1	SBP1	Biotin (K)	0	1	1	STTKTVAR	_STTK(bi)TVAR_;_STTK(bi)TVAR_;_STTK(bi)TVAR_;_STTK(bi)TVAR_	331	NA	NA	NA	NA	NA	NA	NA	NA	NA	NA	NA	NA	NA	NA	NA	NA	NA	NA	NA
PF3D7_0508000	Plasmodium falciparum 3D7	6-cysteine protein	P38	Biotin (K)	0	1	1	SIGVNKHSFSNSEIFER	_SIGVNK(bi)HSFSNSEIFER_;_SIGVNK(bi)HSFSNSEIFER_	310	NA	NA	NA	NA	NA	NA	NA	NA	NA	NA	NA	NA	NA	NA	NA	NA	NA	NA	NA
PF3D7_0511500	Plasmodium falciparum 3D7	RNA pseudouridylate synthase, putative	N/A	Biotin (K)	0	1	2	NNLYKLVDDINEKYNVK	_NNLYK(bi)LVDDINEKYNVK_;_NNLYK(bi)LVDDINEKYNVK_;_NNLYK(bi)LVDDINEKYNVK_	2901	NA	NA	NA	NA	NA	NA	NA	NA	NA	NA	NA	NA	NA	NA	NA	NA	NA	NA	NA
PF3D7_0520800	Plasmodium falciparum 3D7	conserved protein, unknown function	N/A	Biotin (K)	0	1	1	ICQPLTKHINEK	_ICQPLTK(bi)HINEK_;_ICQPLTK(bi)HINEK_;_ICQPLTK(bi)HINEK_;_ICQPLTK(bi)HINEK_;_ICQPLTK(bi)HINEK_;_ICQPLTK(bi)HINEK_	265	NA	0.0106355	0.948309	-0.240506	NA	NA	NA	22.1802	22.1876	22.0266	21.9077	21.8792	21.8861	NA	NA	NA	NA	NA	NA
[truncated: 1,382 more rows]
