# Supplementary material for: PerTurboID, a targeted in situ method reveals the impact of kinase deletion on its local protein environment in the cytoadhesion complex of malaria-causing parasites
Source: eLife. 2023 Sep 22;12:e86367. doi: 10.7554/eLife.86367 (PMC10564455; doi:10.7554/eLife.86367)
Supplement: Supplementary file 6. [file elife-86367-supp6.xlsx]

## Sheet: all
Supplementary Table 8: Network analysis of proteins observed in FIKK4.1, KAHRP, and PTP4 TurboID datasets.
Node 1	Protein IDs	Gene Name	PF/Human/Exported PF?
FIKK4.1	PF3D7_0216400	VPS45	PF
FIKK4.1	PF3D7_0929400	RhopH2	export
FIKK4.1	PF3D7_1434500	PF3D7_1434500	PF
FIKK4.1	PF3D7_0703500	PF3D7_0703500	PF
FIKK4.1	PF3D7_1337300	PF3D7_1337300	PF
FIKK4.1	PF3D7_1039000	FIKK10.2	export
FIKK4.1	PF3D7_0220800	CLAG2	PF
FIKK4.1	PF3D7_1301700	CBP2	export
FIKK4.1	P02549	SPTA1	human
FIKK4.1	PF3D7_0202000	KAHRP	export
FIKK4.1	PF3D7_1464500	PF3D7_1464500	PF
FIKK4.1	PF3D7_0614900	PF3D7_0614900	PF
FIKK4.1	PF3D7_0317300	NUP335	PF
FIKK4.1	PF3D7_1317800	RPS19	PF
FIKK4.1	PF3D7_1118300	PF3D7_1118300	PF
FIKK4.1	PF3D7_0214600	STK2	PF
FIKK4.1	PF3D7_0512600	RAB1b	export
FIKK4.1	PF3D7_0831400	PF3D7_0831400	export
FIKK4.1	PF3D7_1235600	SHMT	PF
FIKK4.1	PF3D7_1149100	PF3D7_1149100	export
FIKK4.1	PF3D7_0807500	PF3D7_0807500	PF
FIKK4.1	PF3D7_0704300	BLEB	PF
FIKK4.1	PF3D7_1002200	PArt	PF
FIKK4.1	Q9NRL2	BAZ1A	human
FIKK4.1	PF3D7_0112200	MRP1	export
FIKK4.1	PF3D7_1477500	PF3D7_1477500	export
FIKK4.1	P16452	EPB42	human
FIKK4.1	PF3D7_0501300	SBP1	export
FIKK4.1	PF3D7_1233600	AARP1	PF
FIKK4.1	PF3D7_1211900	ATP4	PF
FIKK4.1	PF3D7_1238800	ACS11	PF
FIKK4.1	PF3D7_1201000	PF3D7_1201000	export
FIKK4.1	O15440	ABCC5	human
FIKK4.1	PF3D7_0424600	PF3D7_0424600	export
FIKK4.1	PF3D7_0935900	REX1	export
FIKK4.1	A6NGD5	ZSCAN5C	human
FIKK4.1	PF3D7_1129900	MFR5	PF
FIKK4.1	PF3D7_1101700	MC-2TM	export
FIKK4.1	PF3D7_0532400	LyMP	export
FIKK4.1	PF3D7_0302500	CLAG3.1	export
FIKK4.1	P11166	SLC2A1	human
FIKK4.1	Q15223	NECTIN1	human
FIKK4.1	PF3D7_1124600	EK	export
FIKK4.1	PF3D7_0304200	EHD	PF
FIKK4.1	PF3D7_0905400	RhopH3	export
FIKK4.1	O95819	MAP4K4	human
FIKK4.1	PF3D7_1228800	PF3D7_1228800	PF
FIKK4.1	P11277	SPTB	human
FIKK4.1	Q9Y4A0	JRKL	human
FIKK4.1	PF3D7_1327500	PF3D7_1327500	PF
FIKK4.1	PF3D7_1349200	PF3D7_1349200	PF
FIKK4.1	PF3D7_0523000	MDR1	PF
FIKK4.1	PF3D7_1227500	SOC2	PF
FIKK4.1	PF3D7_1115800	PF3D7_1115800	export
FIKK4.1	P28289	TMOD1	human
FIKK4.1	PF3D7_1200800	FIKK12	export
FIKK4.1	PF3D7_0628100	HECT1	PF
FIKK4.1	Q99469	STAC	human
FIKK4.1	PF3D7_0508900	AAP6	PF
FIKK4.1	PF3D7_1149600	PF3D7_1149600	export
FIKK4.1	Q14254	FLOT2	human
FIKK4.1	PF3D7_0107500	NCR1	PF
FIKK4.1	P35240	NF2	human
FIKK4.1	PF3D7_1002100	PTP5	export
FIKK4.1	Q96RT1	ERBIN	human
FIKK4.1	PF3D7_0831600	CLAG8	PF
FIKK4.1	PF3D7_0831500	PF3D7_0831500	export
FIKK4.1	PF3D7_1447900	MDR2	PF
FIKK4.1	P02730	SLC4A1	human
FIKK4.1	P16157	ANK1	human
FIKK4.1	PF3D7_0201600	RLP1	export
FIKK4.1	PF3D7_1102500	GEXP02	export
FIKK4.1	PF3D7_0501200	PIESP2	export
FIKK4.1	PF3D7_0301600	GEXP21	export
FIKK4.1	Q9H4G4	GLIPR2	human
FIKK4.1	PF3D7_1436300	PTEX150	PF
FIKK4.1	PF3D7_1236100	CARP	PF
FIKK4.1	Q8NHG7	SVIP	human
FIKK4.1	P17066	HSPA6	human
FIKK4.1	Q9H095	IQCG	human
FIKK4.1	PF3D7_1477000	PF3D7_1477000	PF
FIKK4.1	Q14571	ITPR2	human
FIKK4.1	Q9UPE1	SRPK3	human
FIKK4.1	PF3D7_0702500	PF3D7_0702500	export
FIKK4.1	PF3D7_0202400	PTEF	export
FIKK4.1	O00161	SNAP23	human
FIKK4.1	PF3D7_0201900	EMP3	export
FIKK4.1	P23588	EIF4B	human
FIKK4.1	PF3D7_0830500	TryThrA	export
FIKK4.1	PF3D7_1038800	PF3D7_1038800	export
FIKK4.1	PF3D7_0500800	MESA	export
FIKK4.1	P23276	KEL	human
FIKK4.1	PF3D7_1001600	XL2	export
FIKK4.1	Q96GI7	FAM89A	human
FIKK4.1	PF3D7_0801000	PF3D7_0801000	export
FIKK4.1	PF3D7_0614300	MFR1	PF
FIKK4.1	PF3D7_1149200	RESA3	export
FIKK4.1	PF3D7_0822600	SEC23	export
FIKK4.1	PF3D7_0402400	GEXP18	export
FIKK4.1	PF3D7_0220100	PF3D7_0220100	export
FIKK4.1	PF3D7_0113700	HSP40	export
FIKK4.1	PF3D7_1307200	PF3D7_1307200	PF
FIKK4.1	PF3D7_0201800	KAHsp40	export
FIKK4.1	P23634	ATP2B4	human
FIKK4.1	PF3D7_1371900	PF3D7_1371900	export
FIKK4.1	Q04656	ATP7A	human
FIKK4.1	PF3D7_0936800	PF3D7_0936800	export
FIKK4.1	PF3D7_1201100	PF3D7_1201100	export
FIKK4.1	PF3D7_1334500	MSRP6	export
FIKK4.1	PF3D7_0730800	PF3D7_0730800	export
FIKK4.1	Q8IUW5	RELL1	human
FIKK4.1	PF3D7_0220600	PF3D7_0220600	export
FIKK4.1	PF3D7_1016400	FIKK10.1	export
FIKK4.1	Q9UEY8	ADD3	human
FIKK4.1	PF3D7_0731100	PTP2	export
FIKK4.1	PF3D7_0731600	ACS5	export
FIKK4.1	PF3D7_1001000	CSA-L	export
FIKK4.1	PF3D7_1253400	ACS3	export
FIKK4.1	P35612	ADD2	human
FIKK4.1	PF3D7_1223400	PF3D7_1223400	PF
FIKK4.1	Q96PL5	ERMAP	human
FIKK4.1	PF3D7_1301400	HYP12	export
FIKK4.1	PF3D7_0102200	RESA	export
FIKK4.1	PF3D7_0730900	PTP4	export
FIKK4.1	Q00013	MPP1	human
FIKK4.1	P27105	STOM	human
FIKK4.1	PF3D7_1200700	ACS7	export
FIKK4.1	PF3D7_1478600	PTP3	export
FIKK4.1	P11171	EPB41	human
FIKK4.1	PF3D7_0402100	PF3D7_0402100	export
FIKK4.1	PF3D7_1401200	PF3D7_1401200	export
FIKK4.1	PF3D7_0532300	PF3D7_0532300	export
FIKK4.1	PF3D7_0113200	PF3D7_0113200	export
FIKK4.1	P37840	SNCA	human
FIKK4.1	P35611	ADD1	human
FIKK4.1	PF3D7_0402000	PF3D7_0402000	export
FIKK4.1	PF3D7_1476300	PF3D7_1476300	export
FIKK4.1	PF3D7_0201500	PF3D7_0201500	export
FIKK4.1	PF3D7_0424500	FIKK4.1	export
FIKK4.1	Q08495	DMTN	human
KAHRP	PF3D7_0202000	KAHRP	export
KAHRP	PF3D7_0730900	PTP4	export
KAHRP	O60488	ACSL4	human
KAHRP	PF3D7_0424500	FIKK4.1	export
KAHRP	PF3D7_1426100	BTF3	PF
KAHRP	PF3D7_1200700	ACS7	export
KAHRP	PF3D7_0201900	EMP3	export
KAHRP	Q9ULH1	ASAP1	human
KAHRP	PF3D7_0905400	RhopH3	export
KAHRP	PF3D7_1149100	PF3D7_1149100	export
KAHRP	PF3D7_1149600	PF3D7_1149600	export
KAHRP	Q6DN14	MCTP1	human
KAHRP	PF3D7_0500800	MESA	export
KAHRP	Q01518	CAP1	human
KAHRP	PF3D7_0401800	PfD80	export
KAHRP	PF3D7_0831000	GEXP09	export
KAHRP	P49773	HINT1	human
KAHRP	PF3D7_0702000	PF3D7_0702000	export
KAHRP	PF3D7_1016300	GBP130	export
KAHRP	PF3D7_1149400	PF3D7_1149400	export
KAHRP	PF3D7_1001600	XL2	export
KAHRP	PF3D7_0831700	HSP70x	export
KAHRP	PF3D7_1253400	ACS3	export
KAHRP	PF3D7_1479000	ACS1a	export
KAHRP	P31948	STIP1	human
KAHRP	PF3D7_1334500	MSRP6	export
KAHRP	Q08495	DMTN	human
KAHRP	P02549	SPTA1	human
KAHRP	PF3D7_0220800	CLAG2	PF
KAHRP	P11277	SPTB	human
KAHRP	P37840	SNCA	human
KAHRP	P26599	PTBP1	human
KAHRP	PF3D7_1477500	PF3D7_1477500	export
KAHRP	P78417	GSTO1	human
KAHRP	PF3D7_1135100	PPM8	PF
KAHRP	PF3D7_0936800	PF3D7_0936800	export
KAHRP	Q8NHG7	SVIP	human
KAHRP	PF3D7_0202400	PTEF	export
KAHRP	PF3D7_1478600	PTP3	export
KAHRP	PF3D7_0801000	PF3D7_0801000	export
KAHRP	PF3D7_1139300	AP2-G5	PF
KAHRP	P62826	RAN	human
KAHRP	PF3D7_1401200	PF3D7_1401200	export
KAHRP	P55010	EIF5	human
KAHRP	P00915	CA1	human
KAHRP	P16157	ANK1	human
KAHRP	PF3D7_0524000	KASbeta	PF
KAHRP	P00918	CA2	human
KAHRP	PF3D7_0114500	PF3D7_0114500	export
KAHRP	PF3D7_0730800	PF3D7_0730800	export
KAHRP	PF3D7_0532300	PF3D7_0532300	export
KAHRP	PF3D7_1420100	PF3D7_1420100	PF
KAHRP	P16989	YBX3	human
KAHRP	PF3D7_1148700	GEXP12	export
KAHRP	PF3D7_0424700	FIKK4.2	export
KAHRP	PF3D7_0424900	PF3D7_0424900	export
KAHRP	PF3D7_1001800	PF3D7_1001800	export
KAHRP	PF3D7_0731100	PTP2	export
KAHRP	PF3D7_1201000	PF3D7_1201000	export
KAHRP	PF3D7_0731600	ACS5	export
KAHRP	PF3D7_0532400	LyMP	export
KAHRP	P11171	EPB41	human
KAHRP	P68871	HBB	human
KAHRP	PF3D7_1476200	PF3D7_1476200	export
KAHRP	Q99808	SLC29A1	human
KAHRP	PF3D7_0113700	HSP40	export
KAHRP	P48426	PIP4K2A	human
KAHRP	P78356	PIP4K2B	human
KAHRP	PF3D7_1001400	XL1	export
KAHRP	PF3D7_1328500	PF3D7_1328500	PF
KAHRP	PF3D7_0320900	H2A.Z	PF
KAHRP	PF3D7_0520800	PF3D7_0520800	PF
KAHRP	P28289	TMOD1	human
KAHRP	PF3D7_0113000	GARP	export
KAHRP	PF3D7_1301700	CBP2	export
KAHRP	Q8TBX8	PIP4K2C	human
KAHRP	P69905	HBA1; HBA2	human
KAHRP	PF3D7_1201100	PF3D7_1201100	export
KAHRP	P0DMV8	HSPA1A	human
KAHRP	P0DMV9	HSPA1B	human
KAHRP	P11142	HSPA8	human
KAHRP	P34931	HSPA1L	human
KAHRP	PF3D7_1371900	PF3D7_1371900	export
KAHRP	PF3D7_1108600	ERC	export
KAHRP	PF3D7_1149000	Pf332	export
KAHRP	Q9Y570	PPME1	human
KAHRP	PF3D7_0200300	PF3D7_0200300	PF
KAHRP	PF3D7_0900800	VAR	PF
KAHRP	PF3D7_1200600	VAR2CSA	export
KAHRP	Q9NTK5	OLA1	human
KAHRP	PF3D7_1016400	FIKK10.1	export
KAHRP	PF3D7_1354300	PF3D7_1354300	PF
KAHRP	PF3D7_1239200	ApiAP2	PF
KAHRP	PF3D7_1403000	PF3D7_1403000	PF
KAHRP	P67809	YBX1	human
KAHRP	PF3D7_0802200	1-CysPxn	PF
KAHRP	PF3D7_0902000	FIKK9.1	export
KAHRP	PF3D7_1410400	RAP1	PF
KAHRP	PF3D7_1001200	ACBP2	PF
KAHRP	Q8WW12	PCNP	human
KAHRP	PF3D7_0220100	PF3D7_0220100	export
KAHRP	PF3D7_0704600	UT	PF
KAHRP	P23763	VAMP1	human
KAHRP	P63027	VAMP2	human
KAHRP	Q15836	VAMP3	human
KAHRP	PF3D7_1372300	PF3D7_1372300	export
KAHRP	P06703	S100A6	human
KAHRP	PF3D7_1124800	RRS1	PF
KAHRP	Q96DL1	NXPE2	human
KAHRP	Q9NTX5	ECHDC1	human
KAHRP	PF3D7_0935900	REX1	export
KAHRP	PF3D7_0721100	PF3D7_0721100	PF
KAHRP	PF3D7_0731300	PfG174	export
KAHRP	PF3D7_0201800	KAHsp40	export
KAHRP	PF3D7_0202100	LSAP2	export
KAHRP	Q14847	LASP1	human
KAHRP	Q93009	USP7	human
KAHRP	PF3D7_1200800	FIKK12	export
KAHRP	P35612	ADD2	human
KAHRP	Q00688	FKBP3	human
KAHRP	P78318	IGBP1	human
KAHRP	Q15819	UBE2V2	human
KAHRP	PF3D7_0910200	PF3D7_0910200	PF
KAHRP	PF3D7_1314200	TERT	PF
KAHRP	PF3D7_0302200	CLAG3.2	export
KAHRP	PF3D7_0302500	CLAG3.1	export
KAHRP	PF3D7_1372400	ACS4	PF
KAHRP	PF3D7_0301600	GEXP21	export
KAHRP	P25786	PSMA1	human
KAHRP	Q9ULB4	CDH9	human
KAHRP	PF3D7_1419400	PF3D7_1419400	PF
KAHRP	P29972	AQP1	human
KAHRP	P37802	TAGLN2	human
KAHRP	P50990	CCT8	human
KAHRP	PF3D7_1102500	GEXP02	export
KAHRP	PF3D7_1107300	PAIP1	PF
KAHRP	PF3D7_1001000	CSA-L	export
KAHRP	P21980	TGM2	human
KAHRP	P09651	HNRNPA1	human
KAHRP	P52597	HNRNPF	human
KAHRP	PF3D7_1436300	PTEX150	PF
KAHRP	PF3D7_1320000	GP1	PF
KAHRP	PF3D7_0705500	PF3D7_0705500	PF
KAHRP	P02042	HBD	human
KAHRP	PF3D7_0831400	PF3D7_0831400	export
KAHRP	P11166	SLC2A1	human
KAHRP	Q9H910	JPT2	human
KAHRP	Q13442	PDAP1	human
KAHRP	P09105	HBQ1	human
KAHRP	Q13404	UBE2V1	human
KAHRP	PF3D7_0729900	PF3D7_0729900	PF
KAHRP	Q38SD2	LRRK1	human
KAHRP	PF3D7_0501200	PIESP2	export
KAHRP	P02730	SLC4A1	human
KAHRP	Q8NE71	ABCF1	human
KAHRP	Q9UJU6	DBNL	human
KAHRP	PF3D7_1367700	AlaRS	PF
KAHRP	PF3D7_0201600	RLP1	export
KAHRP	Q5QJ74	TBCEL	human
KAHRP	PF3D7_1226900	PV2	PF
KAHRP	PF3D7_1301400	HYP12	export
KAHRP	Q04760	GLO1	human
KAHRP	O43768	ENSA	human
KAHRP	PF3D7_0831300	GEXP13	export
KAHRP	PF3D7_0402100	PF3D7_0402100	export
KAHRP	O14717	TRDMT1	human
KAHRP	PF3D7_1039000	FIKK10.2	export
KAHRP	P61326	MAGOH	human
KAHRP	Q96A72	MAGOHB	human
KAHRP	Q8WZ42	TTN	human
KAHRP	Q00013	MPP1	human
KAHRP	PF3D7_1205600	PF3D7_1205600	PF
KAHRP	PF3D7_0115200	RIF	export
KAHRP	P46060	RANGAP1	human
KAHRP	Q9BR77	CCDC77	human
KAHRP	Q96A49	SYAP1	human
KAHRP	PF3D7_0830500	TryThrA	export
KAHRP	P48729	CSNK1A1	human
KAHRP	P23588	EIF4B	human
KAHRP	Q99733	NAP1L4	human
KAHRP	PF3D7_0113200	PF3D7_0113200	export
KAHRP	PF3D7_1477000	PF3D7_1477000	PF
KAHRP	PF3D7_1033200	ETRAMP10.2	export
KAHRP	Q13177	PAK2	human
KAHRP	PF3D7_1035200	PF3D7_1035200	PF
KAHRP	PF3D7_0936300	REX3	export
KAHRP	PF3D7_0221200	PF3D7_0221200	export
KAHRP	O43491	EPB41L2	human
KAHRP	Q9Y2J2	EPB41L3	human
KAHRP	PF3D7_0702500	PF3D7_0702500	export
KAHRP	PF3D7_0102200	RESA	export
KAHRP	PF3D7_1252700	PF3D7_1252700	export
KAHRP	PF3D7_0702400	SEMP1	export
KAHRP	PF3D7_1353100	PF3D7_1353100	export
KAHRP	PF3D7_1434600	METAP2	PF
PTP4	PF3D7_1322100	SET2	PF
PTP4	PF3D7_0202000	KAHRP	export
PTP4	PF3D7_1334500	MSRP6	export
PTP4	PF3D7_0424500	FIKK4.1	export
PTP4	PF3D7_0801000	PF3D7_0801000	export
PTP4	P11171	EPB41	human
PTP4	PF3D7_1149600	PF3D7_1149600	export
PTP4	PF3D7_0905400	RhopH3	export
PTP4	PF3D7_0105700	PF3D7_0105700	PF
PTP4	PF3D7_0730900	PTP4	export
PTP4	PF3D7_0113000	GARP	export
PTP4	O43491	EPB41L2	human
PTP4	Q9Y2J2	EPB41L3	human
PTP4	PF3D7_0730800	PF3D7_0730800	export
PTP4	PF3D7_0726100	PF3D7_0726100	export
PTP4	P48426	PIP4K2A	human
PTP4	P78356	PIP4K2B	human
PTP4	PF3D7_1367700	AlaRS	PF
PTP4	PF3D7_0113700	HSP40	export
PTP4	P31948	STIP1	human
PTP4	PF3D7_1149400	PF3D7_1149400	export
PTP4	PF3D7_1016300	GBP130	export
PTP4	PF3D7_1445400	CLK1	PF
PTP4	PF3D7_0220100	PF3D7_0220100	export
PTP4	PF3D7_1016400	FIKK10.1	export
PTP4	PF3D7_0113200	PF3D7_0113200	export
PTP4	PF3D7_1036900	PF3D7_1036900	PF
PTP4	PF3D7_0203100	PF3D7_0203100	PF
PTP4	PF3D7_0201900	EMP3	export
PTP4	PF3D7_0202400	PTEF	export
PTP4	PF3D7_0500800	MESA	export
PTP4	Q16543	CDC37	human
PTP4	P69905	HBA1; HBA2	human
PTP4	PF3D7_1224300	PABP1	PF
PTP4	PF3D7_1301700	CBP2	export
PTP4	PF3D7_1149000	Pf332	export
PTP4	PF3D7_0501200	PIESP2	export
PTP4	P06703	S100A6	human
PTP4	P37840	SNCA	human
PTP4	PF3D7_1446200	LAP	PF
PTP4	PF3D7_1419400	PF3D7_1419400	PF
PTP4	P50990	CCT8	human
PTP4	P54578	USP14	human
PTP4	PF3D7_0201800	KAHsp40	export
PTP4	PF3D7_1477500	PF3D7_1477500	export
PTP4	P28289	TMOD1	human
PTP4	PF3D7_1248900	RPT6	PF
PTP4	PF3D7_1478600	PTP3	export
PTP4	P23588	EIF4B	human
PTP4	PF3D7_0910200	PF3D7_0910200	PF
PTP4	Q9Y570	PPME1	human
PTP4	P16989	YBX3	human
PTP4	P67809	YBX1	human
PTP4	PF3D7_0936800	PF3D7_0936800	export
PTP4	P02042	HBD	human
PTP4	P68871	HBB	human
PTP4	P49959	MRE11	human
PTP4	P02549	SPTA1	human
PTP4	PF3D7_0402100	PF3D7_0402100	export
PTP4	PF3D7_1200600	VAR2CSA	export
PTP4	Q13177	PAK2	human
PTP4	Q08495	DMTN	human
PTP4	PF3D7_1135100	PPM8	PF
PTP4	Q9UJU6	DBNL	human
PTP4	Q13442	PDAP1	human
PTP4	Q9ULB4	CDH9	human
PTP4	PF3D7_0731100	PTP2	export
PTP4	P11277	SPTB	human
PTP4	Q14847	LASP1	human
PTP4	PF3D7_0532400	LyMP	export
PTP4	PF3D7_0524000	KASbeta	PF
PTP4	P37802	TAGLN2	human
PTP4	Q16143	SNCB	human
PTP4	Q15819	UBE2V2	human
PTP4	PF3D7_0705500	PF3D7_0705500	PF
PTP4	PF3D7_0731300	PfG174	export
PTP4	PF3D7_1107300	PAIP1	PF
PTP4	PF3D7_1108600	ERC	export
PTP4	P35611	ADD1	human
PTP4	PF3D7_0532300	PF3D7_0532300	export
PTP4	P00915	CA1	human
PTP4	PF3D7_1139300	AP2-G5	PF
PTP4	P16157	ANK1	human
PTP4	PF3D7_1301400	HYP12	export
PTP4	PF3D7_1253400	ACS3	export
PTP4	PF3D7_1372400	ACS4	PF
PTP4	P35612	ADD2	human
PTP4	Q99808	SLC29A1	human
PTP4	PF3D7_1464500	PF3D7_1464500	PF
PTP4	PF3D7_1039000	FIKK10.2	export
PTP4	PF3D7_0424700	FIKK4.2	export
PTP4	PF3D7_1436300	PTEX150	PF
PTP4	PF3D7_0108300	ARP	export
PTP4	PF3D7_1423700	PF3D7_1423700	PF
PTP4	P0DMV8	HSPA1A	human
PTP4	P0DMV9	HSPA1B	human
PTP4	P11142	HSPA8	human
PTP4	P34931	HSPA1L	human
PTP4	PF3D7_1479000	ACS1a	export
PTP4	PF3D7_0301600	GEXP21	export
PTP4	P78318	IGBP1	human
PTP4	PF3D7_1016700	PF3D7_1016700	export
PTP4	PF3D7_0936300	REX3	export
PTP4	PF3D7_0501100	HSP40	export
PTP4	PF3D7_1401200	PF3D7_1401200	export
PTP4	PF3D7_0935900	REX1	export
PTP4	P11166	SLC2A1	human
PTP4	PF3D7_1016600	PF3D7_1016600	export
PTP4	PF3D7_1019000	PF3D7_1019000	PF
PTP4	O14717	TRDMT1	human
PTP4	PF3D7_1001000	CSA-L	export
PTP4	PF3D7_0924600	PF3D7_0924600	PF
PTP4	PF3D7_0102200	RESA	export
PTP4	P29972	AQP1	human
PTP4	PF3D7_0831300	GEXP13	export
PTP4	P07900	HSP90AA1	human
PTP4	P08238	HSP90AB1	human
PTP4	PF3D7_0708400	HSP90	PF
PTP4	Q58FG1	HSP90AA4P	human
PTP4	PF3D7_0831700	HSP70x	export
PTP4	P00918	CA2	human
PTP4	PF3D7_1201000	PF3D7_1201000	export
PTP4	PF3D7_0202100	LSAP2	export
PTP4	P21980	TGM2	human
PTP4	P52597	HNRNPF	human
PTP4	PF3D7_0200300	PF3D7_0200300	PF
PTP4	PF3D7_0900800	VAR	PF
PTP4	PF3D7_1206300	PF3D7_1206300	PF
PTP4	Q13404	UBE2V1	human
PTP4	P02730	SLC4A1	human
PTP4	PF3D7_1200700	ACS7	export
PTP4	P25786	PSMA1	human
PTP4	PF3D7_1033200	ETRAMP10.2	export
PTP4	PF3D7_0731600	ACS5	export
PTP4	PF3D7_0401800	PfD80	export
PTP4	Q07866	KLC1	human
PTP4	Q9BZA5	TXLNGY	human
PTP4	Q9H0B6	KLC2	human
PTP4	PF3D7_0702500	PF3D7_0702500	export
PTP4	PF3D7_1102500	GEXP02	export
PTP4	P48729	CSNK1A1	human
PTP4	PF3D7_0902000	FIKK9.1	export
PTP4	PF3D7_1371900	PF3D7_1371900	export
PTP4	PF3D7_0402400	GEXP18	export
PTP4	PF3D7_0702400	SEMP1	export
PTP4	PF3D7_0830500	TryThrA	export
PTP4	PF3D7_1477000	PF3D7_1477000	PF
PTP4	Q9NTX5	ECHDC1	human
PTP4	PF3D7_1353100	PF3D7_1353100	export
PTP4	Q9NUQ3	TXLNG	human
