# Supplementary material for: PerTurboID, a targeted in situ method reveals the impact of kinase deletion on its local protein environment in the cytoadhesion complex of malaria-causing parasites
Source: eLife. 2023 Sep 22;12:e86367. doi: 10.7554/eLife.86367 (PMC10564455; doi:10.7554/eLife.86367)
Supplement: Supplementary file 7. [file elife-86367-supp7.xlsx]

## Sheet: PHIST proteins
Supplementary Table 7: All PHIST proteins in the KAHRP and PTP4 PerTurboID dataset. Position of the PRESAN domain was predicted by PFAM in PlasmoDB. The position of biotinylation relative to the center of the PRESAN domain has been calculated.
Proteins	Protein Name	PRESAN Start	PRESAN end	Center of PRESAN domain	Biotinylation Position in Protein	Biotinylation Position relative to Center of PRESAN domain
PF3D7_0801000	Plasmodium exported protein (PHISTc), unknown function	1081	1205	1143	156	-987
PF3D7_0801000	Plasmodium exported protein (PHISTc), unknown function	1081	1205	1143	165	-978
PF3D7_0801000	Plasmodium exported protein (PHISTc), unknown function	1081	1205	1143	166	-977
PF3D7_0801000	Plasmodium exported protein (PHISTc), unknown function	1081	1205	1143	179	-964
PF3D7_0801000	Plasmodium exported protein (PHISTc), unknown function	1081	1205	1143	184	-959
PF3D7_0801000	Plasmodium exported protein (PHISTc), unknown function	1081	1205	1143	436	-707
PF3D7_0731100	EMP1-trafficking protein	742	865	803.5	113	-690.5
PF3D7_0801000	Plasmodium exported protein (PHISTc), unknown function	1081	1205	1143	454	-689
PF3D7_0801000	Plasmodium exported protein (PHISTc), unknown function	1081	1205	1143	461	-682
PF3D7_0731100	EMP1-trafficking protein	742	865	803.5	132	-671.5
PF3D7_0801000	Plasmodium exported protein (PHISTc), unknown function	1081	1205	1143	473	-670
PF3D7_0801000	Plasmodium exported protein (PHISTc), unknown function	1081	1205	1143	479	-664
PF3D7_0801000	Plasmodium exported protein (PHISTc), unknown function	1081	1205	1143	485	-658
PF3D7_0801000	Plasmodium exported protein (PHISTc), unknown function	1081	1205	1143	488	-655
PF3D7_0801000	Plasmodium exported protein (PHISTc), unknown function	1081	1205	1143	492	-651
PF3D7_0801000	Plasmodium exported protein (PHISTc), unknown function	1081	1205	1143	505	-638
PF3D7_0731100	EMP1-trafficking protein	742	865	803.5	198	-605.5
PF3D7_0731100	EMP1-trafficking protein	742	865	803.5	200	-603.5
PF3D7_1016700	Plasmodium exported protein (PHISTc), unknown function	675	799	737	174	-563
PF3D7_0731100	EMP1-trafficking protein	742	865	803.5	246	-557.5
PF3D7_0731100	EMP1-trafficking protein	742	865	803.5	294	-509.5
PF3D7_0731100	EMP1-trafficking protein	742	865	803.5	304	-499.5
PF3D7_0731100	EMP1-trafficking protein	742	865	803.5	318	-485.5
PF3D7_1016700	Plasmodium exported protein (PHISTc), unknown function	675	799	737	256	-481
PF3D7_0731100	EMP1-trafficking protein	742	865	803.5	342	-461.5
PF3D7_0731100	EMP1-trafficking protein	742	865	803.5	345	-458.5
PF3D7_0731100	EMP1-trafficking protein	742	865	803.5	362	-441.5
PF3D7_0401800	Plasmodium exported protein (PHISTb), unknown function	430	552	491	71	-420
PF3D7_0731100	EMP1-trafficking protein	742	865	803.5	391	-412.5
PF3D7_0731100	EMP1-trafficking protein	742	865	803.5	397	-406.5
PF3D7_1102500	Plasmodium exported protein (PHISTb), unknown function	436	554	495	100	-395
PF3D7_0731100	EMP1-trafficking protein	742	865	803.5	422	-381.5
PF3D7_1102500	Plasmodium exported protein (PHISTb), unknown function	436	554	495	127	-368
PF3D7_0731100	EMP1-trafficking protein	742	865	803.5	438	-365.5
PF3D7_0731100	EMP1-trafficking protein	742	865	803.5	472	-331.5
PF3D7_1102500	Plasmodium exported protein (PHISTb), unknown function	436	554	495	175	-320
PF3D7_1016700	Plasmodium exported protein (PHISTc), unknown function	675	799	737	434	-303
PF3D7_0731100	EMP1-trafficking protein	742	865	803.5	542	-261.5
PF3D7_1016700	Plasmodium exported protein (PHISTc), unknown function	675	799	737	480	-257
PF3D7_0731100	EMP1-trafficking protein	742	865	803.5	552	-251.5
PF3D7_1016700	Plasmodium exported protein (PHISTc), unknown function	675	799	737	496	-241
PF3D7_0731100	EMP1-trafficking protein	742	865	803.5	566	-237.5
PF3D7_0801000	Plasmodium exported protein (PHISTc), unknown function	1081	1205	1143	928	-215
PF3D7_0731100	EMP1-trafficking protein	742	865	803.5	604	-199.5
PF3D7_1102500	Plasmodium exported protein (PHISTb), unknown function	436	554	495	298	-197
PF3D7_1102500	Plasmodium exported protein (PHISTb), unknown function	436	554	495	300	-195
PF3D7_1102500	Plasmodium exported protein (PHISTb), unknown function	436	554	495	305	-190
PF3D7_0801000	Plasmodium exported protein (PHISTc), unknown function	1081	1205	1143	962	-181
PF3D7_1476200	Plasmodium exported protein (PHISTb), unknown function	301	422	361.5	189	-172.5
PF3D7_1476200	Plasmodium exported protein (PHISTb), unknown function	301	422	361.5	194	-167.5
PF3D7_0801000	Plasmodium exported protein (PHISTc), unknown function	1081	1205	1143	986	-157
PF3D7_1476200	Plasmodium exported protein (PHISTb), unknown function	301	422	361.5	205	-156.5
PF3D7_1476200	Plasmodium exported protein (PHISTb), unknown function	301	422	361.5	210	-151.5
PF3D7_0424800	Plasmodium exported protein (PHISTb), unknown function	181	305	243	92	-151
PF3D7_0401800	Plasmodium exported protein (PHISTb), unknown function	430	552	491	347	-144
PF3D7_1476200	Plasmodium exported protein (PHISTb), unknown function	301	422	361.5	223	-138.5
PF3D7_0401800	Plasmodium exported protein (PHISTb), unknown function	430	552	491	355	-136
PF3D7_0220100	DnaJ protein, putative	172	298	235	102	-133
PF3D7_0532300	Plasmodium exported protein (PHISTb), unknown function	179	297	238	106	-132
PF3D7_1476200	Plasmodium exported protein (PHISTb), unknown function	301	422	361.5	231	-130.5
PF3D7_0202100	liver stage associated protein 2	166	289	227.5	98	-129.5
PF3D7_0220100	DnaJ protein, putative	172	298	235	107	-128
PF3D7_0220100	DnaJ protein, putative	172	298	235	109	-126
PF3D7_0731300	Plasmodium exported protein (PHISTb), unknown function	134	258	196	73	-123
PF3D7_0731100	EMP1-trafficking protein	742	865	803.5	686	-117.5
PF3D7_0401800	Plasmodium exported protein (PHISTb), unknown function	430	552	491	374	-117
PF3D7_1001800	Plasmodium exported protein (PHISTc), unknown function	128	248	188	71	-117
PF3D7_0401800	Plasmodium exported protein (PHISTb), unknown function	430	552	491	378	-113
PF3D7_1001800	Plasmodium exported protein (PHISTc), unknown function	128	248	188	75	-113
PF3D7_0401800	Plasmodium exported protein (PHISTb), unknown function	430	552	491	390	-101
PF3D7_1102500	Plasmodium exported protein (PHISTb), unknown function	436	554	495	395	-100
PF3D7_0831000	Plasmodium exported protein (PHISTb), unknown function	169	295	232	136	-96
PF3D7_0401800	Plasmodium exported protein (PHISTb), unknown function	430	552	491	397	-94
PF3D7_0401800	Plasmodium exported protein (PHISTb), unknown function	430	552	491	399	-92
PF3D7_0401800	Plasmodium exported protein (PHISTb), unknown function	430	552	491	407	-84
PF3D7_0424900	Plasmodium exported protein (PHISTa), unknown function	140	266	203	123	-80
PF3D7_0731100	EMP1-trafficking protein	742	865	803.5	724	-79.5
PF3D7_0936800	Plasmodium exported protein (PHISTc), unknown function	98	221	159.5	80	-79.5
PF3D7_0424900	Plasmodium exported protein (PHISTa), unknown function	140	266	203	124	-79
PF3D7_0401800	Plasmodium exported protein (PHISTb), unknown function	430	552	491	413	-78
PF3D7_0532400	lysine-rich membrane-associated PHISTb protein	163	285	224	146	-78
PF3D7_0801000	Plasmodium exported protein (PHISTc), unknown function	1081	1205	1143	1065	-78
PF3D7_0801000	Plasmodium exported protein (PHISTc), unknown function	1081	1205	1143	1066	-77
PF3D7_0936800	Plasmodium exported protein (PHISTc), unknown function	98	221	159.5	84	-75.5
PF3D7_1016600	Plasmodium exported protein (PHISTc), unknown function	156	279	217.5	146	-71.5
PF3D7_0402100	Plasmodium exported protein (PHISTb), unknown function	130	258	194	123	-71
PF3D7_0731100	EMP1-trafficking protein	742	865	803.5	734	-69.5
PF3D7_0936800	Plasmodium exported protein (PHISTc), unknown function	98	221	159.5	92	-67.5
PF3D7_0532300	Plasmodium exported protein (PHISTb), unknown function	179	297	238	171	-67
PF3D7_0424600	Plasmodium exported protein (PHISTb), unknown function	175	297	236	188	-48
PF3D7_0401800	Plasmodium exported protein (PHISTb), unknown function	430	552	491	480	-11
PF3D7_0401800	Plasmodium exported protein (PHISTb), unknown function	430	552	491	482	-9
PF3D7_0424900	Plasmodium exported protein (PHISTa), unknown function	140	266	203	199	-4
PF3D7_0424900	Plasmodium exported protein (PHISTa), unknown function	140	266	203	202	-1
PF3D7_1372300	Plasmodium exported protein (PHIST), unknown function	70	198	134	134	0
PF3D7_0532400	lysine-rich membrane-associated PHISTb protein	163	285	224	260	36
PF3D7_1477500	Plasmodium exported protein (PHISTb), unknown function	184	305	244.5	313	68.5
PF3D7_0219700	Plasmodium exported protein (PHISTc), unknown function	160	283	221.5	293	71.5
PF3D7_1148700	Plasmodium exported protein (PHISTc), unknown function	101	218	159.5	236	76.5
PF3D7_0102200	ring-infected erythrocyte surface antigen	175	294	234.5	312	77.5
PF3D7_1477500	Plasmodium exported protein (PHISTb), unknown function	184	305	244.5	326	81.5
PF3D7_1148700	Plasmodium exported protein (PHISTc), unknown function	101	218	159.5	242	82.5
PF3D7_1477500	Plasmodium exported protein (PHISTb), unknown function	184	305	244.5	328	83.5
PF3D7_0532400	lysine-rich membrane-associated PHISTb protein	163	285	224	309	85
PF3D7_0102200	ring-infected erythrocyte surface antigen	175	294	234.5	320	85.5
PF3D7_1148700	Plasmodium exported protein (PHISTc), unknown function	101	218	159.5	246	86.5
PF3D7_0532300	Plasmodium exported protein (PHISTb), unknown function	179	297	238	332	94
PF3D7_0731300	Plasmodium exported protein (PHISTb), unknown function	134	258	196	291	95
PF3D7_0936800	Plasmodium exported protein (PHISTc), unknown function	98	221	159.5	255	95.5
PF3D7_0220100	DnaJ protein, putative	172	298	235	331	96
PF3D7_1148700	Plasmodium exported protein (PHISTc), unknown function	101	218	159.5	256	96.5
PF3D7_0532300	Plasmodium exported protein (PHISTb), unknown function	179	297	238	335	97
PF3D7_1102500	Plasmodium exported protein (PHISTb), unknown function	436	554	495	593	98
PF3D7_1477500	Plasmodium exported protein (PHISTb), unknown function	184	305	244.5	343	98.5
PF3D7_0532300	Plasmodium exported protein (PHISTb), unknown function	179	297	238	338	100
PF3D7_0731300	Plasmodium exported protein (PHISTb), unknown function	134	258	196	299	103
PF3D7_0201600	PHISTb domain-containing RESA-like protein 1	171	292	231.5	338	106.5
PF3D7_1477500	Plasmodium exported protein (PHISTb), unknown function	184	305	244.5	351	106.5
PF3D7_0936800	Plasmodium exported protein (PHISTc), unknown function	98	221	159.5	267	107.5
PF3D7_0402100	Plasmodium exported protein (PHISTb), unknown function	130	258	194	305	111
PF3D7_0532300	Plasmodium exported protein (PHISTb), unknown function	179	297	238	351	113
PF3D7_0731300	Plasmodium exported protein (PHISTb), unknown function	134	258	196	310	114
PF3D7_0731300	Plasmodium exported protein (PHISTb), unknown function	134	258	196	313	117
PF3D7_0532300	Plasmodium exported protein (PHISTb), unknown function	179	297	238	356	118
PF3D7_0201700	DnaJ protein, putative	135	257	196	317	121
PF3D7_0936800	Plasmodium exported protein (PHISTc), unknown function	98	221	159.5	281	121.5
PF3D7_1148700	Plasmodium exported protein (PHISTc), unknown function	101	218	159.5	287	127.5
PF3D7_1252700	Plasmodium exported protein (PHISTb), unknown function	170	293	231.5	364	132.5
PF3D7_0936800	Plasmodium exported protein (PHISTc), unknown function	98	221	159.5	297	137.5
PF3D7_0532400	lysine-rich membrane-associated PHISTb protein	163	285	224	363	139
PF3D7_0936800	Plasmodium exported protein (PHISTc), unknown function	98	221	159.5	302	142.5
PF3D7_1477500	Plasmodium exported protein (PHISTb), unknown function	184	305	244.5	389	144.5
PF3D7_0936800	Plasmodium exported protein (PHISTc), unknown function	98	221	159.5	307	147.5
PF3D7_1477500	Plasmodium exported protein (PHISTb), unknown function	184	305	244.5	393	148.5
PF3D7_0936800	Plasmodium exported protein (PHISTc), unknown function	98	221	159.5	312	152.5
PF3D7_0936800	Plasmodium exported protein (PHISTc), unknown function	98	221	159.5	317	157.5
PF3D7_0220100	DnaJ protein, putative	172	298	235	396	161
PF3D7_0936800	Plasmodium exported protein (PHISTc), unknown function	98	221	159.5	322	162.5
PF3D7_0936800	Plasmodium exported protein (PHISTc), unknown function	98	221	159.5	327	167.5
PF3D7_0220100	DnaJ protein, putative	172	298	235	406	171
PF3D7_0936800	Plasmodium exported protein (PHISTc), unknown function	98	221	159.5	332	172.5
PF3D7_1148700	Plasmodium exported protein (PHISTc), unknown function	101	218	159.5	332	172.5
PF3D7_1148700	Plasmodium exported protein (PHISTc), unknown function	101	218	159.5	341	181.5
PF3D7_0936800	Plasmodium exported protein (PHISTc), unknown function	98	221	159.5	342	182.5
PF3D7_0936800	Plasmodium exported protein (PHISTc), unknown function	98	221	159.5	347	187.5
PF3D7_0402100	Plasmodium exported protein (PHISTb), unknown function	130	258	194	383	189
PF3D7_0532400	lysine-rich membrane-associated PHISTb protein	163	285	224	413	189
PF3D7_0532400	lysine-rich membrane-associated PHISTb protein	163	285	224	414	190
PF3D7_0402100	Plasmodium exported protein (PHISTb), unknown function	130	258	194	390	196
PF3D7_0936800	Plasmodium exported protein (PHISTc), unknown function	98	221	159.5	357	197.5
PF3D7_0532300	Plasmodium exported protein (PHISTb), unknown function	179	297	238	438	200
PF3D7_0936800	Plasmodium exported protein (PHISTc), unknown function	98	221	159.5	360	200.5
PF3D7_0532300	Plasmodium exported protein (PHISTb), unknown function	179	297	238	441	203
PF3D7_1201000	Plasmodium exported protein (PHISTb), unknown function	130	249	189.5	393	203.5
PF3D7_0936800	Plasmodium exported protein (PHISTc), unknown function	98	221	159.5	365	205.5
PF3D7_1252700	Plasmodium exported protein (PHISTb), unknown function	170	293	231.5	437	205.5
PF3D7_0532300	Plasmodium exported protein (PHISTb), unknown function	179	297	238	449	211
PF3D7_1201100	RESA-like protein with PHIST and DnaJ domains	175	296	235.5	450	214.5
PF3D7_1252700	Plasmodium exported protein (PHISTb), unknown function	170	293	231.5	447	215.5
PF3D7_0532400	lysine-rich membrane-associated PHISTb protein	163	285	224	440	216
PF3D7_0936800	Plasmodium exported protein (PHISTc), unknown function	98	221	159.5	376	216.5
PF3D7_0220100	DnaJ protein, putative	172	298	235	452	217
PF3D7_0532300	Plasmodium exported protein (PHISTb), unknown function	179	297	238	463	225
PF3D7_0201600	PHISTb domain-containing RESA-like protein 1	171	292	231.5	459	227.5
PF3D7_0532300	Plasmodium exported protein (PHISTb), unknown function	179	297	238	466	228
PF3D7_1201100	RESA-like protein with PHIST and DnaJ domains	175	296	235.5	472	236.5
PF3D7_1477500	Plasmodium exported protein (PHISTb), unknown function	184	305	244.5	484	239.5
PF3D7_0532400	lysine-rich membrane-associated PHISTb protein	163	285	224	465	241
PF3D7_0532400	lysine-rich membrane-associated PHISTb protein	163	285	224	468	244
PF3D7_0201600	PHISTb domain-containing RESA-like protein 1	171	292	231.5	479	247.5
PF3D7_1477500	Plasmodium exported protein (PHISTb), unknown function	184	305	244.5	493	248.5
PF3D7_1201000	Plasmodium exported protein (PHISTb), unknown function	130	249	189.5	517	327.5
PF3D7_1201000	Plasmodium exported protein (PHISTb), unknown function	130	249	189.5	525	335.5
PF3D7_0220100	DnaJ protein, putative	172	298	235	590	355
PF3D7_0220100	DnaJ protein, putative	172	298	235	605	370
PF3D7_1201000	Plasmodium exported protein (PHISTb), unknown function	130	249	189.5	575	385.5
PF3D7_1201100	RESA-like protein with PHIST and DnaJ domains	175	296	235.5	734	498.5
PF3D7_1201100	RESA-like protein with PHIST and DnaJ domains	175	296	235.5	739	503.5
