# Supplementary material for: PerTurboID, a targeted in situ method reveals the impact of kinase deletion on its local protein environment in the cytoadhesion complex of malaria-causing parasites
Source: eLife. 2023 Sep 22;12:e86367. doi: 10.7554/eLife.86367 (PMC10564455; doi:10.7554/eLife.86367)
Supplement: Supplementary file 8. [file elife-86367-supp8.xlsx]

## Sheet: allfintable
Supplementary Table 6: KAHRP vs PTP4 TurboID peptide-level data. Intensities have been normalized and imputed. Only biotinylated peptides are included. Related to figure 3D.
Protein	Organism	Protein names	Gene Names	Previous ID(s)	PF	HS	Modifications	Phospho	Biotin (K)	Missed cleavages	Biotinylation Position	Phosphate position	Sequence	Modified sequence	Pvalue_Kahrp/PTP4	Qvalue_Kahrp/PTP4	Log2 Fold Change_Kahrp/PTP4	Intensity Kahrp_DMSO1_Normalized	Intensity Kahrp_DMSO2_Normalized	Intensity Kahrp_DMSO3_Normalized	Intensity PTP4_DMSO1_Normalized	Intensity PTP4_DMSO2_Normalized	Intensity PTP4_DMSO3_Normalized
P69905	Homo sapiens (Human)	Hemoglobin subunit alpha (Alpha-globin) (Hemoglobin alpha chain)	HBA1; HBA2	NA	0	1	Biotin (K)	0	1	2	12	NA	VLSPADKTNVKAAWGK	_VLSPADKTNVK(bi)AAWGK_;_VLSPADKTNVK(bi)AAWGK_;_VLSPADKTNVK(bi)AAWGK_;_VLSPADKTNVK(bi)AAWGK_;_VLSPADKTNVK(bi)AAWGK_;_VLSPADKTNVK(bi)AAWGK_;_VLSPADKTNVK(bi)AAWGK_;_VLSPADKTNVK(bi)AAWGK_;_VLSPADKTNVK(bi)AAWGK_;_VLSPADKTNVK(bi)AAWGK_;_VLSPADKTNVK(bi)AAWGK_;_VLSPADKTNVK(bi)AAWGK_;_VLSPADKTNVK(bi)AAWGK_;_VLSPADKTNVK(bi)AAWGK_;_VLSPADKTNVK(bi)AAWGK_;_VLSPADKTNVK(bi)AAWGK_;_VLSPADKTNVK(bi)AAWGK_;_VLSPADK…	0.000794278	2.71645	9.15123	28.6964	27.8912	28.3169	20.1698	20.077	17.2039
PF3D7_0532300	Plasmodium falciparum 3D7	Plasmodium exported protein (PHISTb), unknown function	N/A	Previous IDs: MAL5P1.314;PFE1600w	1	0	Biotin (K)	0	1	1	463	NA	FSEVAKR	_FSEVAK(bi)R_;_FSEVAK(bi)R_;_FSEVAK(bi)R_;_FSEVAK(bi)R_;_FSEVAK(bi)R_;_FSEVAK(bi)R_;_FSEVAK(bi)R_;_FSEVAK(bi)R_;_FSEVAK(bi)R_;_FSEVAK(bi)R_;_FSEVAK(bi)R_;_FSEVAK(bi)R_;_FSEVAK(bi)R_;_FSEVAK(bi)R_;_FSEVAK(bi)R_;_FSEVAK(bi)R_;_FSEVAK(bi)R_;_FSEVAK(bi)R_;_FSEVAK(bi)R_;_FSEVAK(bi)R_;_FSEVAK(bi)R_;_FSEVAK(bi)R_;_FSEVAK(bi)R_;_FSEVAK(bi)R_;_FSEVAK(bi)R_;_FSEVAK(bi)R_;_FSEVAK(bi)R_;_FSEVAK(bi)R_;_FSEVAK…	0.00014717	3.18155	9.05466	27.7414	27.826	28.1262	18.5172	20.0635	17.9488
PF3D7_0401800	Plasmodium falciparum 3D7	Plasmodium exported protein (PHISTb), unknown function	PfD80	Previous IDs: MAL4P1.16;PFD0080c	1	0	2 Biotin (K)	0	2	2	347;355	NA	GFGCDCKDAANYILKNLDLYDEHEAK	_GFGCDCK(bi)DAANYILK(bi)NLDLYDEHEAK_;_GFGCDCK(bi)DAANYILK(bi)NLDLYDEHEAK_;_GFGCDCK(bi)DAANYILK(bi)NLDLYDEHEAK_;_GFGCDCK(bi)DAANYILK(bi)NLDLYDEHEAK_;_GFGCDCK(bi)DAANYILK(bi)NLDLYDEHEAK_;_GFGCDCK(bi)DAANYILK(bi)NLDLYDEHEAK_;_GFGCDCK(bi)DAANYILK(bi)NLDLYDEHEAK_;_GFGCDCK(bi)DAANYILK(bi)NLDLYDEHEAK_;_GFGCDCK(bi)DAANYILK(bi)NLDLYDEHEAK_;_GFGCDCK(bi)DAANYILK(bi)NLDLYDEHEAK_;_GFGCDCK(bi)DAANYILK(bi)NLDLY…	0.000276595	3.02111	8.29707	27.1179	27.1791	26.5776	17.4865	19.7871	18.7099
PF3D7_0202000	Plasmodium falciparum 3D7	knob-associated histidine-rich protein	KAHRP	Previous IDs: PF02_0020;PFB0100c	1	0	2 Biotin (K)	0	2	3	354;359;351;364	NA	YSSFSSVNKYGKHGDEKHHSSK	_YSSFSSVNKYGK(bi)HGDEKHHSSK_;_YSSFSSVNKYGK(bi)HGDEKHHSSK_;_YSSFSSVNKYGK(bi)HGDEKHHSSK_;_YSSFSSVNKYGK(bi)HGDEKHHSSK_;_YSSFSSVNKYGK(bi)HGDEKHHSSK_;_YSSFSSVNKYGK(bi)HGDEKHHSSK_;_YSSFSSVNKYGK(bi)HGDEKHHSSK_;_YSSFSSVNKYGK(bi)HGDEKHHSSK_;_YSSFSSVNKYGK(bi)HGDEKHHSSK_;_YSSFSSVNKYGKHGDEK(bi)HHSSK_;_YSSFSSVNKYGK(bi)HGDEKHHSSK_;_YSSFSSVNKYGK(bi)HGDEKHHSSK_;_YSSFSSVNKYGK(bi)HGDEKHHSSK_;_YSSFSSVNKYGK(bi)HGDEK…	2.50185e-05	3.62321	8.2909	27.5809	27.5459	27.2291	18.4668	19.666	19.3504
PF3D7_0202000	Plasmodium falciparum 3D7	knob-associated histidine-rich protein	KAHRP	Previous IDs: PF02_0020;PFB0100c	1	0	Biotin (K)	0	1	2	623;617	NA	GASTTAGSTTGATTGANAVQSKDETADKNAANNGEQVMSR	_GASTTAGSTTGATTGANAVQSKDETADK(bi)NAANNGEQVM(ox)SR_;_GASTTAGSTTGATTGANAVQSK(bi)DETADKNAANNGEQVM(ox)SR_;_GASTTAGSTTGATTGANAVQSK(bi)DETADKNAANNGEQVM(ox)SR_;_GASTTAGSTTGATTGANAVQSK(bi)DETADKNAANNGEQVM(ox)SR_;_GASTTAGSTTGATTGANAVQSK(bi)DETADKNAANNGEQVM(ox)SR_;_GASTTAGSTTGATTGANAVQSK(bi)DETADKNAANNGEQVM(ox)SR_;_GASTTAGSTTGATTGANAVQSK(bi)DETADKNAANNGEQVM(ox)SR_;_GASTTAGSTTGATTGANAVQSK(bi)DETADKNAANNGEQV…	1.73578e-06	4.04975	7.84185	26.5667	26.6454	26.9567	19.0917	18.9294	18.6221
PF3D7_0113000	Plasmodium falciparum 3D7	glutamic acid-rich protein GARP	GARP	Previous IDs: MAL1P3.06;PFA0620c	1	0	Biotin (K)	0	1	2	497;503;499	NA	LIDEPEQLTLMDKSKVEEK	_LIDEPEQLTLM(ox)DK(bi)SKVEEK_;_LIDEPEQLTLM(ox)DK(bi)SKVEEK_;_LIDEPEQLTLM(ox)DKSKVEEK(bi)_;_LIDEPEQLTLM(ox)DK(bi)SKVEEK_;_LIDEPEQLTLM(ox)DK(bi)SKVEEK_;_LIDEPEQLTLM(ox)DKSKVEEK(bi)_;_LIDEPEQLTLM(ox)DK(bi)SKVEEK_;_LIDEPEQLTLM(ox)DK(bi)SKVEEK_;_LIDEPEQLTLM(ox)DK(bi)SKVEEK_;_LIDEPEQLTLM(ox)DKSKVEEK(bi)_;_LIDEPEQLTLM(ox)DK(bi)SKVEEK_;_LIDEPEQLTLM(ox)DKSK(bi)VEEK_;_LIDEPEQLTLM(ox)DK(bi)SKVEEK_;_LIDEPEQL…	5.12194e-06	3.89646	7.15665	25.5978	25.598	25.4151	18.0411	18.762	18.3379
PF3D7_1301400	Plasmodium falciparum 3D7	Plasmodium exported protein (hyp12), unknown function	HYP12	Previous IDs: PF13_0073	1	0	Biotin (K)	0	1	2	375	NA	NKLLSLRH	_NK(bi)LLSLRH_;_NK(bi)LLSLRH_;_NK(bi)LLSLRH_;_NK(bi)LLSLRH_;_NK(bi)LLSLRH_;_NK(bi)LLSLRH_;_NK(bi)LLSLRH_;_NK(bi)LLSLRH_;_NK(bi)LLSLRH_	0.00280828	2.3086	7.12003	24.2801	23.7386	26.9514	18.7174	17.6638	17.2288
PF3D7_0532300	Plasmodium falciparum 3D7	Plasmodium exported protein (PHISTb), unknown function	N/A	Previous IDs: MAL5P1.314;PFE1600w	1	0	Biotin (K)	0	1	2	106	NA	SKCCDSISESNMVDRLK	_SK(bi)CCDSISESNMVDRLK_;_SK(bi)CCDSISESNMVDRLK_;_SK(bi)CCDSISESNMVDRLK_;_SK(bi)CCDSISESNMVDRLK_;_SK(bi)CCDSISESNMVDRLK_;_SK(bi)CCDSISESNMVDRLK_;_SK(bi)CCDSISESNM(ox)VDRLK_;_SK(bi)CCDSISESNM(ox)VDRLK_;_SK(bi)CCDSISESNM(ox)VDRLK_;_SK(bi)CCDSISESNM(ox)VDRLK_;_SK(bi)CCDSISESNM(ox)VDRLK_;_SK(bi)CCDSISESNM(ox)VDRLK_	5.10826e-05	3.45623	6.99617	25.9085	25.6121	25.7524	18.5952	18.2202	19.4691
PF3D7_1401200	Plasmodium falciparum 3D7	Plasmodium exported protein, unknown function	N/A	Previous IDs: PF14_0014	1	0	Biotin (K)	0	1	1	60	NA	INSKYDELR	_INSK(bi)YDELR_;_INSK(bi)YDELR_;_INSK(bi)YDELR_;_INSK(bi)YDELR_;_INSK(bi)YDELR_;_INSK(bi)YDELR_;_INSK(bi)YDELR_;_INSK(bi)YDELR_;_INSK(bi)YDELR_;_INSK(bi)YDELR_;_INSK(bi)YDELR_;_INSK(bi)YDELR_;_INSK(bi)YDELR_;_INSK(bi)YDELR_;_INSK(bi)YDELR_;_INSK(bi)YDELR_;_INSK(bi)YDELR_;_INSK(bi)YDELR_;_INSK(bi)YDELR_;_INSK(bi)YDELR_;_INSK(bi)YDELR_;_INSK(bi)YDELR_;_INSK(bi)YDELR_;_INSK(bi)YDELR_	0.000201958	3.10101	6.94079	25.9746	27.121	27.6579	19.7433	20.3671	19.8208
PF3D7_0532300	Plasmodium falciparum 3D7	Plasmodium exported protein (PHISTb), unknown function	N/A	Previous IDs: MAL5P1.314;PFE1600w	1	0	2 Biotin (K)	0	2	2	351;356	NA	NYSTHENTYPTLKTLLEKYAITDDYSPPDVFGK	_NYSTHENTYPTLK(bi)TLLEK(bi)YAITDDYSPPDVFGK_;_NYSTHENTYPTLK(bi)TLLEK(bi)YAITDDYSPPDVFGK_;_NYSTHENTYPTLK(bi)TLLEK(bi)YAITDDYSPPDVFGK_;_NYSTHENTYPTLK(bi)TLLEK(bi)YAITDDYSPPDVFGK_;_NYSTHENTYPTLK(bi)TLLEK(bi)YAITDDYSPPDVFGK_;_NYSTHENTYPTLK(bi)TLLEK(bi)YAITDDYSPPDVFGK_;_NYSTHENTYPTLK(bi)TLLEK(bi)YAITDDYSPPDVFGK_;_NYSTHENTYPTLK(bi)TLLEK(bi)YAITDDYSPPDVFGK_;_NYSTHENTYPTLK(bi)TLLEK(bi)YAITDDYSPPDVFGK_;_NY…	4.10276e-05	3.50234	6.89553	25.0086	25.2639	25.4048	18.9554	18.2247	17.8107
PF3D7_0202000	Plasmodium falciparum 3D7	knob-associated histidine-rich protein	KAHRP	Previous IDs: PF02_0020;PFB0100c	1	0	Biotin (K);Phospho (STY)	1	1	2	623;617	598;603;616;599;600	GASTTAGSTTGATTGANAVQSKDETADKNAANNGEQVMSR	_GASTTAGSTTGATTGANAVQSKDETADK(bi)NAANNGEQVM(ox)SR_;_GASTTAGSTTGATTGANAVQSK(bi)DETADKNAANNGEQVM(ox)SR_;_GASTTAGSTTGATTGANAVQSK(bi)DETADKNAANNGEQVM(ox)SR_;_GASTTAGSTTGATTGANAVQSK(bi)DETADKNAANNGEQVM(ox)SR_;_GASTTAGSTTGATTGANAVQSK(bi)DETADKNAANNGEQVM(ox)SR_;_GASTTAGSTTGATTGANAVQSK(bi)DETADKNAANNGEQVM(ox)SR_;_GASTTAGSTTGATTGANAVQSK(bi)DETADKNAANNGEQVM(ox)SR_;_GASTTAGSTTGATTGANAVQSK(bi)DETADKNAANNGEQV…	5.19745e-05	3.45092	6.86547	25.4289	25.5071	25.4656	18.9622	17.8547	18.9883
PF3D7_0401800	Plasmodium falciparum 3D7	Plasmodium exported protein (PHISTb), unknown function	PfD80	Previous IDs: MAL4P1.16;PFD0080c	1	0	2 Biotin (K)	0	2	2	480;482	NA	ILCYCASKNKSLHR	_ILCYCASK(bi)NK(bi)SLHR_;_ILCYCASK(bi)NK(bi)SLHR_;_ILCYCASK(bi)NK(bi)SLHR_;_ILCYCASK(bi)NK(bi)SLHR_;_ILCYCASK(bi)NK(bi)SLHR_;_ILCYCASK(bi)NK(bi)SLHR_;_ILCYCASK(bi)NK(bi)SLHR_;_ILCYCASK(bi)NK(bi)SLHR_;_ILCYCASK(bi)NK(bi)SLHR_;_ILCYCASK(bi)NK(bi)SLHR_;_ILCYCASK(bi)NK(bi)SLHR_;_ILCYCASK(bi)NK(bi)SLHR_	4.57408e-05	3.4775	6.79412	26.363	25.7308	26.1603	19.6755	19.5111	18.6851
PF3D7_0202000	Plasmodium falciparum 3D7	knob-associated histidine-rich protein	KAHRP	Previous IDs: PF02_0020;PFB0100c	1	0	2 Biotin (K)	0	2	3	512;517;520	NA	DKTQGGKTDKTGASTNAATNK	_DK(bi)TQGGKTDKTGASTNAATNK_;_DK(bi)TQGGKTDKTGASTNAATNK_;_DKTQGGK(bi)TDKTGASTNAATNK_;_DKTQGGK(bi)TDKTGASTNAATNK_;_DKTQGGK(bi)TDKTGASTNAATNK_;_DKTQGGKTDK(bi)TGASTNAATNK_;_DKTQGGKTDK(bi)TGASTNAATNK_;_DK(bi)TQGGKTDKTGASTNAATNK_;_DK(bi)TQGGKTDKTGASTNAATNK_;_DKTQGGK(bi)TDKTGASTNAATNK_;_DKTQGGK(bi)TDKTGASTNAATNK_;_DKTQGGK(bi)TDKTGASTNAATNK_;_DKTQGGKTDK(bi)TGASTNAATNK_;_DK(bi)TQGGKTDKTGASTNAATNK_;_DKTQGG…	6.25e-06	3.89467	6.69905	25.0864	25.3304	25.1511	18.2627	18.8922	18.3157
O43491	Homo sapiens (Human)	Band 4.1-like protein 2 (Erythrocyte membrane protein band 4.1-like 2) (Generally expressed protein 4.1) (4.1G)	EPB41L2	NA	0	1	Biotin (K)	0	1	3	956;946	NA	TVKGGISETRIEKR	_TVKGGISETRIEK(bi)R_;_TVKGGISETRIEK(bi)R_;_TVKGGISETRIEK(bi)R_;_TVKGGISETRIEK(bi)R_;_TVKGGISETRIEK(bi)R_;_TVKGGISETRIEK(bi)R_;_TVKGGISETRIEK(bi)R_;_TVKGGISETRIEK(bi)R_;_TVKGGISETRIEK(bi)R_;_TVKGGISETRIEK(bi)R_;_TVKGGISETRIEK(bi)R_;_TVKGGISETRIEK(bi)R_;_TVK(bi)GGISETRIEK(bi)R_;_TVK(bi)GGISETRIEK(bi)R_;_TVK(bi)GGISETRIEK(bi)R_;_TVK(bi)GGISETRIEK(bi)R_;_TVK(bi)GGISETRIEK(bi)R_;_TVK(bi)GGISETRIEK(bi)…	0.000362049	2.95174	6.45618	25.4414	25.3741	26.1041	20.1531	18.339	19.059
P11171	Homo sapiens (Human)	Protein 4.1 (P4.1) (4.1R) (Band 4.1) (EPB4.1) (Erythrocyte membrane protein band 4.1)	EPB41 E41P	NA	0	1	Biotin (K)	0	1	3	818;808	NA	TVKGGISETRIEKR	_TVKGGISETRIEK(bi)R_;_TVKGGISETRIEK(bi)R_;_TVKGGISETRIEK(bi)R_;_TVKGGISETRIEK(bi)R_;_TVKGGISETRIEK(bi)R_;_TVKGGISETRIEK(bi)R_;_TVKGGISETRIEK(bi)R_;_TVKGGISETRIEK(bi)R_;_TVKGGISETRIEK(bi)R_;_TVKGGISETRIEK(bi)R_;_TVKGGISETRIEK(bi)R_;_TVKGGISETRIEK(bi)R_;_TVK(bi)GGISETRIEK(bi)R_;_TVK(bi)GGISETRIEK(bi)R_;_TVK(bi)GGISETRIEK(bi)R_;_TVK(bi)GGISETRIEK(bi)R_;_TVK(bi)GGISETRIEK(bi)R_;_TVK(bi)GGISETRIEK(bi)…	0.000362049	2.95174	6.45618	25.4414	25.3741	26.1041	20.1531	18.339	19.059
Q9Y2J2	Homo sapiens (Human)	Band 4.1-like protein 3 (4.1B) (Differentially expressed in adenocarcinoma of the lung protein 1) (DAL-1) (Erythrocyte membrane protein band 4.1-like 3) [Cleaved into: Band 4.1-like protein 3, N-terminally processed]	EPB41L3 DAL1 KIAA0987	NA	0	1	Biotin (K)	0	1	3	1037;1027	NA	TVKGGISETRIEKR	_TVKGGISETRIEK(bi)R_;_TVKGGISETRIEK(bi)R_;_TVKGGISETRIEK(bi)R_;_TVKGGISETRIEK(bi)R_;_TVKGGISETRIEK(bi)R_;_TVKGGISETRIEK(bi)R_;_TVKGGISETRIEK(bi)R_;_TVKGGISETRIEK(bi)R_;_TVKGGISETRIEK(bi)R_;_TVKGGISETRIEK(bi)R_;_TVKGGISETRIEK(bi)R_;_TVKGGISETRIEK(bi)R_;_TVK(bi)GGISETRIEK(bi)R_;_TVK(bi)GGISETRIEK(bi)R_;_TVK(bi)GGISETRIEK(bi)R_;_TVK(bi)GGISETRIEK(bi)R_;_TVK(bi)GGISETRIEK(bi)R_;_TVK(bi)GGISETRIEK(bi)…	0.000362049	2.95174	6.45618	25.4414	25.3741	26.1041	20.1531	18.339	19.059
PF3D7_0202000	Plasmodium falciparum 3D7	knob-associated histidine-rich protein	KAHRP	Previous IDs: PF02_0020;PFB0100c	1	0	Biotin (K)	0	1	1	623	NA	DETADKNAANNGEQVMSR	_DETADK(bi)NAANNGEQVMSR_;_DETADK(bi)NAANNGEQVMSR_;_DETADK(bi)NAANNGEQVMSR_;_DETADK(bi)NAANNGEQVMSR_;_DETADK(bi)NAANNGEQVMSR_;_DETADK(bi)NAANNGEQVMSR_;_DETADK(bi)NAANNGEQVMSR_;_DETADK(bi)NAANNGEQVMSR_;_DETADK(bi)NAANNGEQVMSR_;_DETADK(bi)NAANNGEQVMSR_;_DETADK(bi)NAANNGEQVMSR_;_DETADK(bi)NAANNGEQVMSR_;_DETADK(bi)NAANNGEQVMSR_;_DETADK(bi)NAANNGEQVMSR_;_DETADK(bi)NAANNGEQVMSR_;_DETADK(bi)NAANNGEQVM(ox…	1.52059e-07	4.37015	6.33112	25.2123	25.1905	25.4305	18.9229	18.925	18.9919
PF3D7_0500800	Plasmodium falciparum 3D7	mature parasite-infected erythrocyte surface antigen	MESA	Previous IDs: MAL5P1.9;PFE0040c	1	0	Biotin (K)	0	1	3	1302;1289;1300	NA	KYNNGELEEYYKEKQNEEYFDEEYIIQSK	_KYNNGELEEYYKEK(bi)QNEEYFDEEYIIQSK_;_K(bi)YNNGELEEYYKEKQNEEYFDEEYIIQSK_;_KYNNGELEEYYKEK(bi)QNEEYFDEEYIIQSK_;_KYNNGELEEYYKEK(bi)QNEEYFDEEYIIQSK_;_KYNNGELEEYYK(bi)EKQNEEYFDEEYIIQSK_;_KYNNGELEEYYK(bi)EKQNEEYFDEEYIIQSK_;_KYNNGELEEYYKEK(bi)QNEEYFDEEYIIQSK_	0.000135265	3.20496	6.30011	25.6661	25.498	24.3787	19.0339	19.0635	18.5451
PF3D7_0202000	Plasmodium falciparum 3D7	knob-associated histidine-rich protein	KAHRP	Previous IDs: PF02_0020;PFB0100c	1	0	2 Biotin (K);Phospho (STY)	1	2	3	354;359;351;364	345;347;348	YSSFSSVNKYGKHGDEKHHSSK	_YSSFSSVNKYGK(bi)HGDEKHHSSK_;_YSSFSSVNKYGK(bi)HGDEKHHSSK_;_YSSFSSVNKYGK(bi)HGDEKHHSSK_;_YSSFSSVNKYGK(bi)HGDEKHHSSK_;_YSSFSSVNKYGK(bi)HGDEKHHSSK_;_YSSFSSVNKYGK(bi)HGDEKHHSSK_;_YSSFSSVNKYGK(bi)HGDEKHHSSK_;_YSSFSSVNKYGK(bi)HGDEKHHSSK_;_YSSFSSVNKYGK(bi)HGDEKHHSSK_;_YSSFSSVNKYGKHGDEK(bi)HHSSK_;_YSSFSSVNKYGK(bi)HGDEKHHSSK_;_YSSFSSVNKYGK(bi)HGDEKHHSSK_;_YSSFSSVNKYGK(bi)HGDEKHHSSK_;_YSSFSSVNKYGK(bi)HGDEK…	0.000266334	3.02435	6.26351	25.1023	24.7282	24.6206	17.656	18.6363	19.3682
PF3D7_0202000	Plasmodium falciparum 3D7	knob-associated histidine-rich protein	KAHRP	Previous IDs: PF02_0020;PFB0100c	1	0	Biotin (K);Phospho (STY)	1	1	3	354;359;351;364	345;347;348	YSSFSSVNKYGKHGDEKHHSSK	_YSSFSSVNKYGK(bi)HGDEKHHSSK_;_YSSFSSVNKYGK(bi)HGDEKHHSSK_;_YSSFSSVNKYGK(bi)HGDEKHHSSK_;_YSSFSSVNKYGK(bi)HGDEKHHSSK_;_YSSFSSVNKYGK(bi)HGDEKHHSSK_;_YSSFSSVNKYGK(bi)HGDEKHHSSK_;_YSSFSSVNKYGK(bi)HGDEKHHSSK_;_YSSFSSVNKYGK(bi)HGDEKHHSSK_;_YSSFSSVNKYGK(bi)HGDEKHHSSK_;_YSSFSSVNKYGKHGDEK(bi)HHSSK_;_YSSFSSVNKYGK(bi)HGDEKHHSSK_;_YSSFSSVNKYGK(bi)HGDEKHHSSK_;_YSSFSSVNKYGK(bi)HGDEKHHSSK_;_YSSFSSVNKYGK(bi)HGDEK…	3.07668e-07	4.22926	6.08071	24.8766	24.67	24.8121	18.8371	18.671	18.6085
PF3D7_0202000	Plasmodium falciparum 3D7	knob-associated histidine-rich protein	KAHRP	Previous IDs: PF02_0020;PFB0100c	1	0	Biotin (K)	0	1	2	354;351	NA	YSSFSSVNKYGKHGDEK	_YSSFSSVNKYGK(bi)HGDEK_;_YSSFSSVNKYGK(bi)HGDEK_;_YSSFSSVNKYGK(bi)HGDEK_;_YSSFSSVNKYGK(bi)HGDEK_;_YSSFSSVNKYGK(bi)HGDEK_;_YSSFSSVNKYGK(bi)HGDEK_;_YSSFSSVNKYGK(bi)HGDEK_;_YSSFSSVNKYGK(bi)HGDEK_;_YSSFSSVNKYGK(bi)HGDEK_;_YSSFSSVNKYGK(bi)HGDEK_;_YSSFSSVNKYGK(bi)HGDEK_;_YSSFSSVNKYGK(bi)HGDEK_;_YSSFSSVNKYGK(bi)HGDEK_;_YSSFSSVNKYGK(bi)HGDEK_;_YSSFSSVNKYGK(bi)HGDEK_;_YSSFSSVNKYGK(bi)HGDEK_;_YSSFSSVNKYGK(b…	0.000815567	2.70742	6.05232	25.6227	25.2495	25.4705	19.2335	18.3457	20.6067
PF3D7_1401200	Plasmodium falciparum 3D7	Plasmodium exported protein, unknown function	N/A	Previous IDs: PF14_0014	1	0	Biotin (K);Oxidation (M)	0	1	2	136	NA	KMPSKYDYLR	_KM(ox)PSK(bi)YDYLR_;_KM(ox)PSK(bi)YDYLR_;_KM(ox)PSK(bi)YDYLR_;_KM(ox)PSK(bi)YDYLR_;_KM(ox)PSK(bi)YDYLR_;_KM(ox)PSK(bi)YDYLR_;_KM(ox)PSK(bi)YDYLR_;_KM(ox)PSK(bi)YDYLR_;_KM(ox)PSK(bi)YDYLR_;_KM(ox)PSK(bi)YDYLR_;_KM(ox)PSK(bi)YDYLR_;_KM(ox)PSK(bi)YDYLR_;_KM(ox)PSK(bi)YDYLR_;_KM(ox)PSK(bi)YDYLR_;_KMPSK(bi)YDYLR_;_KMPSK(bi)YDYLR_;_KMPSK(bi)YDYLR_;_KMPSK(bi)YDYLR_;_KMPSK(bi)YDYLR_;_KMPSK(bi)YDYLR_;_KM…	0.000449585	2.88782	5.91254	23.2448	23.5162	24.1996	18.5806	17.726	16.9162
PF3D7_0202000	Plasmodium falciparum 3D7	knob-associated histidine-rich protein	KAHRP	Previous IDs: PF02_0020;PFB0100c	1	0	2 Biotin (K)	0	2	2	354;351	NA	YSSFSSVNKYGKHGDEK	_YSSFSSVNKYGK(bi)HGDEK_;_YSSFSSVNKYGK(bi)HGDEK_;_YSSFSSVNKYGK(bi)HGDEK_;_YSSFSSVNKYGK(bi)HGDEK_;_YSSFSSVNKYGK(bi)HGDEK_;_YSSFSSVNKYGK(bi)HGDEK_;_YSSFSSVNKYGK(bi)HGDEK_;_YSSFSSVNKYGK(bi)HGDEK_;_YSSFSSVNKYGK(bi)HGDEK_;_YSSFSSVNKYGK(bi)HGDEK_;_YSSFSSVNKYGK(bi)HGDEK_;_YSSFSSVNKYGK(bi)HGDEK_;_YSSFSSVNKYGK(bi)HGDEK_;_YSSFSSVNKYGK(bi)HGDEK_;_YSSFSSVNKYGK(bi)HGDEK_;_YSSFSSVNKYGK(bi)HGDEK_;_YSSFSSVNKYGK(b…	3.93095e-05	3.51108	5.88043	25.6282	24.8381	24.8043	19.2823	19.3891	18.9579
PF3D7_1314200	Plasmodium falciparum 3D7	telomerase reverse transcriptase	TERT	Previous IDs: PF13_0080	1	0	2 Biotin (K)	0	2	2	1235;1238	NA	MAKEEKSNIK	_MAK(bi)EEK(bi)SNIK_;_MAK(bi)EEK(bi)SNIK_;_MAK(bi)EEK(bi)SNIK_;_MAK(bi)EEK(bi)SNIK_;_MAK(bi)EEK(bi)SNIK_;_MAK(bi)EEK(bi)SNIK_	1.90655e-07	4.37015	5.87823	24.631	24.54	24.6026	18.853	18.6028	18.683
PF3D7_1301400	Plasmodium falciparum 3D7	Plasmodium exported protein (hyp12), unknown function	HYP12	Previous IDs: PF13_0073	1	0	2 Biotin (K)	0	2	2	191;197	NA	HNANSEYLLDKNLYDLKTFK	_HNANSEYLLDK(bi)NLYDLK(bi)TFK_;_HNANSEYLLDK(bi)NLYDLK(bi)TFK_;_HNANSEYLLDK(bi)NLYDLK(bi)TFK_;_HNANSEYLLDK(bi)NLYDLK(bi)TFK_;_HNANSEYLLDK(bi)NLYDLK(bi)TFK_;_HNANSEYLLDK(bi)NLYDLK(bi)TFK_;_HNANSEYLLDK(bi)NLYDLK(bi)TFK_;_HNANSEYLLDKNLYDLK(bi)TFK_;_HNANSEYLLDKNLYDLK(bi)TFK_;_HNANSEYLLDKNLYDLK(bi)TFK_;_HNANSEYLLDKNLYDLK(bi)TFK_;_HNANSEYLLDKNLYDLK(bi)TFK_;_HNANSEYLLDKNLYDLK(bi)TFK_	1.27261e-05	3.78039	5.84303	24.7813	24.5162	24.3682	18.3419	18.9541	18.8407
PF3D7_0401800	Plasmodium falciparum 3D7	Plasmodium exported protein (PHISTb), unknown function	PfD80	Previous IDs: MAL4P1.16;PFD0080c	1	0	Biotin (K)	0	1	1	399	NA	NKIVFQDLSK	_NK(bi)IVFQDLSK_;_NK(bi)IVFQDLSK_;_NK(bi)IVFQDLSK_;_NK(bi)IVFQDLSK_;_NK(bi)IVFQDLSK_;_NK(bi)IVFQDLSK_	7.58496e-06	3.89467	5.7738	25.2939	24.9176	25.2523	19.6495	19.3735	19.1193
PF3D7_0202000	Plasmodium falciparum 3D7	knob-associated histidine-rich protein	KAHRP	Previous IDs: PF02_0020;PFB0100c	1	0	Biotin (K)	0	1	3	517;520;531	NA	TQGGKTDKTGASTNAATNKGQCAAEGATK	_TQGGK(bi)TDKTGASTNAATNKGQCAAEGATK_;_TQGGK(bi)TDKTGASTNAATNKGQCAAEGATK_;_TQGGKTDK(bi)TGASTNAATNKGQCAAEGATK_;_TQGGKTDKTGASTNAATNK(bi)GQCAAEGATK_;_TQGGKTDKTGASTNAATNK(bi)GQCAAEGATK_;_TQGGKTDK(bi)TGASTNAATNKGQCAAEGATK_;_TQGGK(bi)TDKTGASTNAATNKGQCAAEGATK_;_TQGGKTDK(bi)TGASTNAATNKGQCAAEGATK_;_TQGGKTDK(bi)TGASTNAATNKGQCAAEGATK_;_TQGGKTDKTGASTNAATNK(bi)GQCAAEGATK_;_TQGGKTDKTGASTNAATNK(bi)GQCAAEGATK_;_TQ…	0.00125502	2.57407	5.76438	25.6227	25.6149	25.9028	19.7548	21.2542	18.8382
PF3D7_0202000	Plasmodium falciparum 3D7	knob-associated histidine-rich protein	KAHRP	Previous IDs: PF02_0020;PFB0100c	1	0	Biotin (K)	0	1	3	490;491;500	NA	NTAGENKKVDSTSADNKSTNAATPGAK	_NTAGENK(bi)KVDSTSADNKSTNAATPGAK_;_NTAGENKK(bi)VDSTSADNKSTNAATPGAK_;_NTAGENKKVDSTSADNK(bi)STNAATPGAK_;_NTAGENK(bi)KVDSTSADNKSTNAATPGAK_;_NTAGENKK(bi)VDSTSADNKSTNAATPGAK_;_NTAGENKKVDSTSADNK(bi)STNAATPGAK_;_NTAGENKKVDSTSADNK(bi)STNAATPGAK_;_NTAGENK(bi)KVDSTSADNKSTNAATPGAK_;_NTAGENKKVDSTSADNK(bi)STNAATPGAK_;_NTAGENK(bi)KVDSTSADNKSTNAATPGAK_;_NTAGENKKVDSTSADNK(bi)STNAATPGAK_;_NTAGENK(bi)KVDSTSADNKSTN…	7.11963e-05	3.37004	5.66335	24.6687	24.3507	25.1073	19.065	19.4726	18.5991
PF3D7_0202000	Plasmodium falciparum 3D7	knob-associated histidine-rich protein	KAHRP	Previous IDs: PF02_0020;PFB0100c	1	0	Biotin (K)	0	1	2	512;500;510	NA	VDSTSADNKSTNAATPGAKDK	_VDSTSADNKSTNAATPGAKDK(bi)_;_VDSTSADNK(bi)STNAATPGAKDK_;_VDSTSADNKSTNAATPGAK(bi)DK_;_VDSTSADNK(bi)STNAATPGAKDK_;_VDSTSADNKSTNAATPGAKDK(bi)_;_VDSTSADNK(bi)STNAATPGAKDK_;_VDSTSADNK(bi)STNAATPGAKDK_;_VDSTSADNKSTNAATPGAK(bi)DK_;_VDSTSADNK(bi)STNAATPGAKDK_;_VDSTSADNKSTNAATPGAK(bi)DK_;_VDSTSADNK(bi)STNAATPGAKDK_;_VDSTSADNKSTNAATPGAKDK(bi)_;_VDSTSADNK(bi)STNAATPGAKDK_;_VDSTSADNK(bi)STNAATPGAKDK_;_VDSTSA…	2.86566e-06	4.00278	5.63596	24.7261	24.4673	24.7964	18.8377	19.2169	19.0273
PF3D7_1239200	Plasmodium falciparum 3D7	AP2 domain transcription factor, putative	ApiAP2	Previous IDs: 2277.t00380;MAL12P1.378;PFL1900w	1	0	Biotin (K)	0	1	3	1463	NA	KKDEEFFNHINVLKVR	_KKDEEFFNHINVLK(bi)VR_;_KKDEEFFNHINVLK(bi)VR_;_KKDEEFFNHINVLK(bi)VR_;_KKDEEFFNHINVLK(bi)VR_;_KKDEEFFNHINVLK(bi)VR_;_KKDEEFFNHINVLK(bi)VR_;_KKDEEFFNHINVLK(bi)VR_;_KKDEEFFNHINVLK(bi)VR_;_KKDEEFFNHINVLK(bi)VR_;_KKDEEFFNHINVLK(bi)VR_;_KKDEEFFNHINVLK(bi)VR_;_KKDEEFFNHINVLK(bi)VR_;_KKDEEFFNHINVLK(bi)VR_;_KKDEEFFNHINVLK(bi)VR_;_KKDEEFFNHINVLK(bi)VR_;_KKDEEFFNHINVLK(bi)VR_	0.0125409	1.76381	5.63493	25.9175	26.5117	26.232	20.6937	18.2886	22.774
PF3D7_0401800	Plasmodium falciparum 3D7	Plasmodium exported protein (PHISTb), unknown function	PfD80	Previous IDs: MAL4P1.16;PFD0080c	1	0	2 Biotin (K)	0	2	3	355;347	NA	GFGCDCKDAANYILKNLDLYDEHEAKK	_GFGCDCKDAANYILK(bi)NLDLYDEHEAKK_;_GFGCDCKDAANYILK(bi)NLDLYDEHEAKK_;_GFGCDCKDAANYILK(bi)NLDLYDEHEAKK_;_GFGCDCKDAANYILK(bi)NLDLYDEHEAKK_;_GFGCDCKDAANYILK(bi)NLDLYDEHEAKK_;_GFGCDCKDAANYILK(bi)NLDLYDEHEAKK_;_GFGCDCKDAANYILK(bi)NLDLYDEHEAKK_;_GFGCDCKDAANYILK(bi)NLDLYDEHEAKK_;_GFGCDCKDAANYILK(bi)NLDLYDEHEAKK_;_GFGCDCKDAANYILK(bi)NLDLYDEHEAKK_;_GFGCDCKDAANYILK(bi)NLDLYDEHEAKK_;_GFGCDCKDAANYILK(bi)NLDLY…	4.669e-05	3.4775	5.55835	27.9583	27.9646	27.1403	21.9392	22.1294	22.3195
PF3D7_0500800	Plasmodium falciparum 3D7	mature parasite-infected erythrocyte surface antigen	MESA	Previous IDs: MAL5P1.9;PFE0040c	1	0	Biotin (K)	0	1	1	885	NA	KDNVIGK	_K(bi)DNVIGK_;_K(bi)DNVIGK_;_K(bi)DNVIGK_;_K(bi)DNVIGK_;_K(bi)DNVIGK_;_K(bi)DNVIGK_;_K(bi)DNVIGK_;_K(bi)DNVIGK_;_K(bi)DNVIGK_;_K(bi)DNVIGK_;_K(bi)DNVIGK_;_K(bi)DNVIGK_;_K(bi)DNVIGK_;_K(bi)DNVIGK_;_K(bi)DNVIGK_;_K(bi)DNVIGK_;_K(bi)DNVIGK_;_K(bi)DNVIGK_;_K(bi)DNVIGK_;_K(bi)DNVIGK_;_K(bi)DNVIGK_	0.00315193	2.26799	5.53179	26.2766	26.3608	26.1603	20.7341	19.2285	22.2397
PF3D7_1478600	Plasmodium falciparum 3D7	EMP1-trafficking protein	PTP3	Previous IDs: PF14_0758	1	0	Biotin (K);Oxidation (M)	0	1	3	479;595	NA	KGTNPFMDEDELEELLRLEREEK	_K(bi)GTNPFM(ox)DEDELEELLRLEREEK_;_K(bi)GTNPFM(ox)DEDELEELLRLEREEK_;_K(bi)GTNPFM(ox)DEDELEELLRLEREEK_;_K(bi)GTNPFM(ox)DEDELEELLRLEREEK_;_K(bi)GTNPFM(ox)DEDELEELLRLEREEK_;_K(bi)GTNPFM(ox)DEDELEELLRLEREEK_;_K(bi)GTNPFM(ox)DEDELEELLRLEREEK_;_K(bi)GTNPFM(ox)DEDELEELLRLEREEK_;_K(bi)GTNPFM(ox)DEDELEELLRLEREEK_;_K(bi)GTNPFM(ox)DEDELEELLRLEREEK_;_K(bi)GTNPFM(ox)DEDELEELLRLEREEK_;_K(bi)GTNPFM(ox)DEDELEELL…	0.000495819	2.85976	5.50755	24.2801	24.804	24.1876	19.4785	17.9243	19.3463
PF3D7_0202000	Plasmodium falciparum 3D7	knob-associated histidine-rich protein	KAHRP	Previous IDs: PF02_0020;PFB0100c	1	0	Biotin (K)	0	1	1	500	NA	VDSTSADNKSTNAATPGAK	_VDSTSADNK(bi)STNAATPGAK_;_VDSTSADNK(bi)STNAATPGAK_;_VDSTSADNK(bi)STNAATPGAK_;_VDSTSADNK(bi)STNAATPGAK_;_VDSTSADNK(bi)STNAATPGAK_;_VDSTSADNK(bi)STNAATPGAK_;_VDSTSADNK(bi)STNAATPGAK_;_VDSTSADNK(bi)STNAATPGAK_;_VDSTSADNK(bi)STNAATPGAK_;_VDSTSADNK(bi)STNAATPGAK_;_VDSTSADNK(bi)STNAATPGAK_;_VDSTSADNK(bi)STNAATPGAK_;_VDSTSADNK(bi)STNAATPGAK_;_VDSTSADNK(bi)STNAATPGAK_;_VDSTSADNK(bi)STNAATPGAK_;_VDSTSADN…	5.33871e-07	4.17728	5.42886	27.0684	27.0605	27.3169	21.7914	21.648	21.7197
PF3D7_0113000	Plasmodium falciparum 3D7	glutamic acid-rich protein GARP	GARP	Previous IDs: MAL1P3.06;PFA0620c	1	0	Biotin (K);Oxidation (M)	0	1	2	533;541	NA	MAKIEEAELQKQK	_M(ox)AK(bi)IEEAELQKQK_;_M(ox)AK(bi)IEEAELQKQK_;_M(ox)AK(bi)IEEAELQKQK_;_M(ox)AK(bi)IEEAELQKQK_;_M(ox)AK(bi)IEEAELQKQK_;_M(ox)AK(bi)IEEAELQKQK_;_M(ox)AK(bi)IEEAELQKQK_;_M(ox)AK(bi)IEEAELQKQK_;_M(ox)AK(bi)IEEAELQKQK_;_M(ox)AK(bi)IEEAELQKQK_;_M(ox)AK(bi)IEEAELQKQK_;_M(ox)AK(bi)IEEAELQKQK_;_M(ox)AK(bi)IEEAELQKQK_;_M(ox)AK(bi)IEEAELQKQK_;_M(ox)AK(bi)IEEAELQKQK_;_M(ox)AK(bi)IEEAELQKQK_;_MAKIEEAELQK(bi…	0.00056228	2.82213	5.42503	23.796	23.958	24.4705	19.6556	18.1698	18.1241
PF3D7_0113000	Plasmodium falciparum 3D7	glutamic acid-rich protein GARP	GARP	Previous IDs: MAL1P3.06;PFA0620c	1	0	Biotin (K)	0	1	2	533;541	NA	MAKIEEAELQKQK	_M(ox)AK(bi)IEEAELQKQK_;_M(ox)AK(bi)IEEAELQKQK_;_M(ox)AK(bi)IEEAELQKQK_;_M(ox)AK(bi)IEEAELQKQK_;_M(ox)AK(bi)IEEAELQKQK_;_M(ox)AK(bi)IEEAELQKQK_;_M(ox)AK(bi)IEEAELQKQK_;_M(ox)AK(bi)IEEAELQKQK_;_M(ox)AK(bi)IEEAELQKQK_;_M(ox)AK(bi)IEEAELQKQK_;_M(ox)AK(bi)IEEAELQKQK_;_M(ox)AK(bi)IEEAELQKQK_;_M(ox)AK(bi)IEEAELQKQK_;_M(ox)AK(bi)IEEAELQKQK_;_M(ox)AK(bi)IEEAELQKQK_;_M(ox)AK(bi)IEEAELQKQK_;_MAKIEEAELQK(bi…	0.000267013	3.02435	5.41811	27.017	26.3725	26.7422	20.5994	22.0078	21.2702
PF3D7_0201900	Plasmodium falciparum 3D7	erythrocyte membrane protein 3	EMP3	Previous IDs: PF02_0019;PFB0095c	1	0	Biotin (K)	0	1	2	427	NA	LKDSDDKVVVPVNK	_LKDSDDK(bi)VVVPVNK_;_LKDSDDK(bi)VVVPVNK_;_LKDSDDK(bi)VVVPVNK_;_LKDSDDK(bi)VVVPVNK_;_LKDSDDK(bi)VVVPVNK_;_LKDSDDK(bi)VVVPVNK_;_LKDSDDK(bi)VVVPVNK_;_LKDSDDK(bi)VVVPVNK_;_LKDSDDK(bi)VVVPVNK_;_LKDSDDK(bi)VVVPVNK_;_LKDSDDK(bi)VVVPVNK_;_LKDSDDK(bi)VVVPVNK_;_LKDSDDK(bi)VVVPVNK_	7.52124e-06	3.89467	5.40693	24.287	24.0522	24.0356	18.8329	18.3981	18.923
PF3D7_0113000	Plasmodium falciparum 3D7	glutamic acid-rich protein GARP	GARP	Previous IDs: MAL1P3.06;PFA0620c	1	0	Biotin (K)	0	1	3	497;503;499	NA	LIDEPEQLTLMDKSKVEEKNLSIQEQLIGTIGR	_LIDEPEQLTLMDK(bi)SKVEEKNLSIQEQLIGTIGR_;_LIDEPEQLTLMDKSKVEEK(bi)NLSIQEQLIGTIGR_;_LIDEPEQLTLMDK(bi)SKVEEKNLSIQEQLIGTIGR_;_LIDEPEQLTLMDK(bi)SKVEEKNLSIQEQLIGTIGR_;_LIDEPEQLTLMDKSKVEEK(bi)NLSIQEQLIGTIGR_;_LIDEPEQLTLMDK(bi)SKVEEKNLSIQEQLIGTIGR_;_LIDEPEQLTLMDK(bi)SKVEEKNLSIQEQLIGTIGR_;_LIDEPEQLTLM(ox)DKSK(bi)VEEKNLSIQEQLIGTIGR_;_LIDEPEQLTLM(ox)DK(bi)SKVEEKNLSIQEQLIGTIGR_;_LIDEPEQLTLM(ox)DKSKVEEK(bi)NLS…	0.000195178	3.11073	5.37015	24.1939	24.0605	23.3479	19.1128	18.299	18.0801
PF3D7_0202000	Plasmodium falciparum 3D7	knob-associated histidine-rich protein	KAHRP	Previous IDs: PF02_0020;PFB0100c	1	0	2 Biotin (K)	0	2	2	623;617	NA	GASTTAGSTTGATTGANAVQSKDETADKNAANNGEQVMSR	_GASTTAGSTTGATTGANAVQSKDETADK(bi)NAANNGEQVM(ox)SR_;_GASTTAGSTTGATTGANAVQSK(bi)DETADKNAANNGEQVM(ox)SR_;_GASTTAGSTTGATTGANAVQSK(bi)DETADKNAANNGEQVM(ox)SR_;_GASTTAGSTTGATTGANAVQSK(bi)DETADKNAANNGEQVM(ox)SR_;_GASTTAGSTTGATTGANAVQSK(bi)DETADKNAANNGEQVM(ox)SR_;_GASTTAGSTTGATTGANAVQSK(bi)DETADKNAANNGEQVM(ox)SR_;_GASTTAGSTTGATTGANAVQSK(bi)DETADKNAANNGEQVM(ox)SR_;_GASTTAGSTTGATTGANAVQSK(bi)DETADKNAANNGEQV…	0.000182958	3.12444	5.36272	24.9789	24.7892	25.6206	20.3797	19.3429	19.5778
PF3D7_0202000	Plasmodium falciparum 3D7	knob-associated histidine-rich protein	KAHRP	Previous IDs: PF02_0020;PFB0100c	1	0	2 Biotin (K)	0	2	3	152;157	NA	EARPGGGFKAYEEKYESK	_EARPGGGFK(bi)AYEEKYESK_;_EARPGGGFK(bi)AYEEKYESK_;_EARPGGGFKAYEEK(bi)YESK_;_EARPGGGFK(bi)AYEEKYESK_;_EARPGGGFKAYEEK(bi)YESK_;_EARPGGGFK(bi)AYEEKYESK_;_EARPGGGFK(bi)AYEEKYESK_;_EARPGGGFK(bi)AYEEKYESK_;_EARPGGGFKAYEEK(bi)YESK_;_EARPGGGFKAYEEK(bi)YESK_;_EARPGGGFK(bi)AYEEKYESK_;_EARPGGGFK(bi)AYEEKYESK_;_EARPGGGFK(bi)AYEEKYESK_;_EARPGGGFKAYEEK(bi)YESK_;_EARPGGGFKAYEEK(bi)YESK_;_EARPGGGFKAYEEK(bi)YESK_…	0.00018505	3.12315	5.33575	23.5408	23.759	23.7506	17.558	18.7276	18.7575
PF3D7_0202000	Plasmodium falciparum 3D7	knob-associated histidine-rich protein	KAHRP	Previous IDs: PF02_0020;PFB0100c	1	0	2 Biotin (K)	0	2	2	164;166	NA	HYKLKENVVDGK	_HYK(bi)LKENVVDGK_;_HYK(bi)LKENVVDGK_;_HYK(bi)LKENVVDGK_;_HYK(bi)LKENVVDGK_;_HYK(bi)LKENVVDGK_;_HYKLK(bi)ENVVDGK_;_HYK(bi)LKENVVDGK_;_HYKLK(bi)ENVVDGK_;_HYK(bi)LKENVVDGK_;_HYKLK(bi)ENVVDGK_;_HYK(bi)LKENVVDGK_;_HYKLK(bi)ENVVDGK_;_HYK(bi)LKENVVDGK_;_HYK(bi)LKENVVDGK_;_HYK(bi)LKENVVDGK_;_HYKLK(bi)ENVVDGK_;_HYK(bi)LKENVVDGK_;_HYK(bi)LKENVVDGK_;_HYKLK(bi)ENVVDGK_;_HYK(bi)LKENVVDGK_;_HYK(bi)LKENVVDGK_;…	4.5072e-05	3.47841	5.33283	24.0864	23.9222	24.0489	19.1718	18.2159	18.6713
PF3D7_0202000	Plasmodium falciparum 3D7	knob-associated histidine-rich protein	KAHRP	Previous IDs: PF02_0020;PFB0100c	1	0	Biotin (K)	0	1	2	354;359	NA	YGKHGDEKHHSSK	_YGK(bi)HGDEKHHSSK_;_YGK(bi)HGDEKHHSSK_;_YGK(bi)HGDEKHHSSK_;_YGK(bi)HGDEKHHSSK_;_YGK(bi)HGDEKHHSSK_;_YGK(bi)HGDEKHHSSK_;_YGK(bi)HGDEKHHSSK_;_YGK(bi)HGDEKHHSSK_;_YGK(bi)HGDEKHHSSK_;_YGK(bi)HGDEKHHSSK_;_YGK(bi)HGDEKHHSSK_;_YGK(bi)HGDEKHHSSK_;_YGK(bi)HGDEKHHSSK_;_YGK(bi)HGDEKHHSSK_;_YGK(bi)HGDEKHHSSK_;_YGK(bi)HGDEK(bi)HHSSK_;_YGK(bi)HGDEK(bi)HHSSK_;_YGK(bi)HGDEK(bi)HHSSK_;_YGK(bi)HGDEK(bi)HHSSK_	0.000152892	3.17489	5.29918	23.825	23.6093	23.9136	18.4834	19.1222	17.8446
PF3D7_0500800	Plasmodium falciparum 3D7	mature parasite-infected erythrocyte surface antigen	MESA	Previous IDs: MAL5P1.9;PFE0040c	1	0	Biotin (K)	0	1	3	1378;1371;1373	NA	ILYNLFLEYNPHMNNKQKAELDKK	_ILYNLFLEYNPHMNNKQKAELDK(bi)K_;_ILYNLFLEYNPHMNNKQKAELDK(bi)K_;_ILYNLFLEYNPHMNNK(bi)QKAELDKK_;_ILYNLFLEYNPHMNNKQKAELDK(bi)K_;_ILYNLFLEYNPHMNNK(bi)QKAELDKK_;_ILYNLFLEYNPHMNNKQKAELDK(bi)K_;_ILYNLFLEYNPHMNNKQKAELDK(bi)K_;_ILYNLFLEYNPHMNNKQKAELDK(bi)K_;_ILYNLFLEYNPHMNNKQKAELDK(bi)K_;_ILYNLFLEYNPHMNNKQKAELDK(bi)K_;_ILYNLFLEYNPHMNNKQK(bi)AELDKK_;_ILYNLFLEYNPHMNNKQKAELDK(bi)K_;_ILYNLFLEYNPHMNNKQKAELDK(bi…	8.25845e-05	3.33094	5.29612	25.1101	25.3675	24.4203	19.7037	19.3785	19.9274
PF3D7_0500800	Plasmodium falciparum 3D7	mature parasite-infected erythrocyte surface antigen	MESA	Previous IDs: MAL5P1.9;PFE0040c	1	0	Biotin (K)	0	1	3	995;993	NA	DTENKDKVIGQEIIIEEIKK	_DTENKDK(bi)VIGQEIIIEEIKK_;_DTENK(bi)DKVIGQEIIIEEIKK_;_DTENKDK(bi)VIGQEIIIEEIKK_;_DTENKDK(bi)VIGQEIIIEEIKK_;_DTENK(bi)DKVIGQEIIIEEIKK_;_DTENKDK(bi)VIGQEIIIEEIKK_;_DTENK(bi)DKVIGQEIIIEEIKK_;_DTENK(bi)DKVIGQEIIIEEIKK_;_DTENKDK(bi)VIGQEIIIEEIKK_;_DTENKDK(bi)VIGQEIIIEEIKK_;_DTENKDK(bi)VIGQEIIIEEIKK_;_DTENKDK(bi)VIGQEIIIEEIKK_;_DTENK(bi)DKVIGQEIIIEEIKK_	0.000697939	2.75872	5.27463	25.1101	25.4548	24.3575	19.3736	19.1282	20.5967
PF3D7_1301400	Plasmodium falciparum 3D7	Plasmodium exported protein (hyp12), unknown function	HYP12	Previous IDs: PF13_0073	1	0	Biotin (K)	0	1	3	283	NA	NLNSDLQYLRNPKGDFHVLSNEEYENREK	_NLNSDLQYLRNPK(bi)GDFHVLSNEEYENREK_;_NLNSDLQYLRNPK(bi)GDFHVLSNEEYENREK_;_NLNSDLQYLRNPK(bi)GDFHVLSNEEYENREK_;_NLNSDLQYLRNPK(bi)GDFHVLSNEEYENREK_;_NLNSDLQYLRNPK(bi)GDFHVLSNEEYENREK_;_NLNSDLQYLRNPK(bi)GDFHVLSNEEYENREK_;_NLNSDLQYLRNPK(bi)GDFHVLSNEEYENREK_;_NLNSDLQYLRNPK(bi)GDFHVLSNEEYENREK_;_NLNSDLQYLRNPK(bi)GDFHVLSNEEYENREK_;_NLNSDLQYLRNPK(bi)GDFHVLSNEEYENREK_;_NLNSDLQYLRNPK(bi)GDFHVLSNEEYENREK_;_NL…	0.00151103	2.51383	5.22502	24.4445	25.121	23.2586	18.8712	18.4612	19.8168
PF3D7_0201900	Plasmodium falciparum 3D7	erythrocyte membrane protein 3	EMP3	Previous IDs: PF02_0019;PFB0095c	1	0	Biotin (K)	0	1	3	1279	NA	NKELLNKDISNKDMK	_NKELLNK(bi)DISNKDM(ox)K_;_NKELLNK(bi)DISNKDM(ox)K_;_NKELLNK(bi)DISNKDM(ox)K_;_NKELLNK(bi)DISNKDM(ox)K_;_NKELLNK(bi)DISNKDM(ox)K_;_NKELLNK(bi)DISNKDM(ox)K_;_NKELLNK(bi)DISNKDM(ox)K_;_NKELLNK(bi)DISNKDM(ox)K_;_NKELLNK(bi)DISNKDM(ox)K_;_NKELLNK(bi)DISNKDM(ox)K_;_NKELLNK(bi)DISNKDM(ox)K_;_NKELLNK(bi)DISNKDM(ox)K_;_NKELLNK(bi)DISNKDM(ox)K_;_NKELLNK(bi)DISNKDM(ox)K_;_NKELLNK(bi)DISNKDM(ox)K_;_NKELLNK(…	0.000167533	3.15057	5.19074	23.5753	23.7691	23.6139	17.8766	19.1636	18.3459
PF3D7_0202000	Plasmodium falciparum 3D7	knob-associated histidine-rich protein	KAHRP	Previous IDs: PF02_0020;PFB0100c	1	0	Biotin (K)	0	1	1	595	NA	EASTTEGATKGASTTAGSTTGATTGANAVQSK	_EASTTEGATK(bi)GASTTAGSTTGATTGANAVQSK_;_EASTTEGATK(bi)GASTTAGSTTGATTGANAVQSK_;_EASTTEGATK(bi)GASTTAGSTTGATTGANAVQSK_;_EASTTEGATK(bi)GASTTAGSTTGATTGANAVQSK_;_EASTTEGATK(bi)GASTTAGSTTGATTGANAVQSK_;_EASTTEGATK(bi)GASTTAGSTTGATTGANAVQSK_;_EASTTEGATK(bi)GASTTAGSTTGATTGANAVQSK_;_EASTTEGATK(bi)GASTTAGSTTGATTGANAVQSK_;_EASTTEGATK(bi)GASTTAGSTTGATTGANAVQSK_;_EASTTEGATK(bi)GASTTAGSTTGATTGANAVQSK_;_EAST(ph)…	0.000280193	3.02111	5.18605	24.4067	24.2459	24.9531	19.7876	19.6616	18.5984
P48426	Homo sapiens (Human)	Phosphatidylinositol 5-phosphate 4-kinase type-2 alpha (EC 2.7.1.149) (1-phosphatidylinositol 5-phosphate 4-kinase 2-alpha) (Diphosphoinositide kinase 2-alpha) (PIP5KIII) (Phosphatidylinositol 5-Phosphate 4-Kinase) (PI5P4Kalpha) (Phosphatidylinositol 5-phosphate 4-kinase type II alpha) (PI(5)P 4-kinase type II alpha) (PIP4KII-alpha) (PtdIns(4)P-5-kinase B isoform) (PtdIns(4)P-5-kinase C isoform) …	PIP4K2A PI5P4KA PIP5K2 PIP5K2A	NA	0	1	Biotin (K)	0	1	2	378	NA	TVKHGAGAEISTVNPEQYSKR	_TVK(bi)HGAGAEISTVNPEQYSKR_;_TVK(bi)HGAGAEISTVNPEQYSKR_;_TVK(bi)HGAGAEISTVNPEQYSKR_;_TVK(bi)HGAGAEISTVNPEQYSKR_;_TVK(bi)HGAGAEISTVNPEQYSKR_;_TVK(bi)HGAGAEISTVNPEQYSKR_;_TVK(bi)HGAGAEISTVNPEQYSKR_;_TVK(bi)HGAGAEISTVNPEQYSKR_;_TVK(bi)HGAGAEISTVNPEQYSKR_;_TVK(bi)HGAGAEISTVNPEQYSKR_;_TVK(bi)HGAGAEISTVNPEQYSKR_;_TVK(bi)HGAGAEISTVNPEQYSKR_;_TVK(bi)HGAGAEISTVNPEQYSKR_;_TVK(bi)HGAGAEISTVNPEQYSKR_	9.18725e-05	3.307	5.17518	24.6687	24.8714	24.6644	19.3581	20.184	19.1369
P78356	Homo sapiens (Human)	Phosphatidylinositol 5-phosphate 4-kinase type-2 beta (EC 2.7.1.149) (1-phosphatidylinositol 5-phosphate 4-kinase 2-beta) (Diphosphoinositide kinase 2-beta) (Phosphatidylinositol 5-phosphate 4-kinase type II beta) (PI(5)P 4-kinase type II beta) (PIP4KII-beta) (PtdIns(5)P-4-kinase isoform 2-beta)	PIP4K2B PIP5K2B	NA	0	1	Biotin (K)	0	1	2	388	NA	TVKHGAGAEISTVNPEQYSKR	_TVK(bi)HGAGAEISTVNPEQYSKR_;_TVK(bi)HGAGAEISTVNPEQYSKR_;_TVK(bi)HGAGAEISTVNPEQYSKR_;_TVK(bi)HGAGAEISTVNPEQYSKR_;_TVK(bi)HGAGAEISTVNPEQYSKR_;_TVK(bi)HGAGAEISTVNPEQYSKR_;_TVK(bi)HGAGAEISTVNPEQYSKR_;_TVK(bi)HGAGAEISTVNPEQYSKR_;_TVK(bi)HGAGAEISTVNPEQYSKR_;_TVK(bi)HGAGAEISTVNPEQYSKR_;_TVK(bi)HGAGAEISTVNPEQYSKR_;_TVK(bi)HGAGAEISTVNPEQYSKR_;_TVK(bi)HGAGAEISTVNPEQYSKR_;_TVK(bi)HGAGAEISTVNPEQYSKR_	9.18725e-05	3.307	5.17518	24.6687	24.8714	24.6644	19.3581	20.184	19.1369
P11171	Homo sapiens (Human)	Protein 4.1 (P4.1) (4.1R) (Band 4.1) (EPB4.1) (Erythrocyte membrane protein band 4.1)	EPB41 E41P	NA	0	1	Biotin (K)	0	1	3	580	NA	SLDGAAAVDSADRSPRPTSAPAITQGQVAEGGVLDASAKK	_SLDGAAAVDSADRSPRPTSAPAITQGQVAEGGVLDASAK(bi)K_;_SLDGAAAVDSADRSPRPTSAPAITQGQVAEGGVLDASAK(bi)K_;_SLDGAAAVDSADRSPRPTSAPAITQGQVAEGGVLDASAK(bi)K_;_SLDGAAAVDSADRSPRPTSAPAITQGQVAEGGVLDASAK(bi)K_;_SLDGAAAVDSADRSPRPTSAPAITQGQVAEGGVLDASAK(bi)K_;_SLDGAAAVDSADRSPRPTSAPAITQGQVAEGGVLDASAK(bi)K_;_SLDGAAAVDSADRSPRPTSAPAITQGQVAEGGVLDASAK(bi)K_;_SLDGAAAVDSADRSPRPTSAPAITQGQVAEGGVLDASAK(bi)K_;_SLDGAAAVDSADRSPRPTSAPA…	0.0387892	1.33159	5.17197	25.8057	25.8807	26.1816	24.1196	18.5179	19.7146
PF3D7_0401800	Plasmodium falciparum 3D7	Plasmodium exported protein (PHISTb), unknown function	PfD80	Previous IDs: MAL4P1.16;PFD0080c	1	0	2 Biotin (K)	0	2	3	480;482	NA	KILCYCASKNKSLHR	_KILCYCASK(bi)NK(bi)SLHR_;_KILCYCASK(bi)NK(bi)SLHR_;_KILCYCASK(bi)NK(bi)SLHR_;_KILCYCASK(bi)NK(bi)SLHR_;_KILCYCASK(bi)NK(bi)SLHR_;_KILCYCASK(bi)NK(bi)SLHR_;_KILCYCASK(bi)NK(bi)SLHR_;_KILCYCASK(bi)NK(bi)SLHR_;_KILCYCASK(bi)NK(bi)SLHR_;_KILCYCASK(bi)NK(bi)SLHR_;_KILCYCASK(bi)NK(bi)SLHR_;_KILCYCASK(bi)NK(bi)SLHR_;_KILCYCASK(bi)NK(bi)SLHR_	2.38762e-06	4.00278	5.13148	24.0128	23.6861	23.8939	18.6661	18.9049	18.6274
P11171	Homo sapiens (Human)	Protein 4.1 (P4.1) (4.1R) (Band 4.1) (EPB4.1) (Erythrocyte membrane protein band 4.1)	EPB41 E41P	NA	0	1	Biotin (K)	0	1	2	852	NA	EAKEQHPDMSVTKVVVHQETEIADE	_EAKEQHPDMSVTK(bi)VVVHQETEIADE_;_EAKEQHPDMSVTK(bi)VVVHQETEIADE_;_EAKEQHPDMSVTK(bi)VVVHQETEIADE_;_EAKEQHPDMSVTK(bi)VVVHQETEIADE_;_EAKEQHPDMSVTK(bi)VVVHQETEIADE_;_EAKEQHPDMSVTK(bi)VVVHQETEIADE_;_EAKEQHPDMSVTK(bi)VVVHQETEIADE_;_EAKEQHPDMSVTK(bi)VVVHQETEIADE_;_EAKEQHPDMSVTK(bi)VVVHQETEIADE_;_EAKEQHPDMSVTK(bi)VVVHQETEIADE_;_EAKEQHPDMSVTK(bi)VVVHQETEIADE_	6.22346e-07	4.17728	5.12263	23.8994	23.9039	23.8388	18.758	18.9132	18.603
P37840	Homo sapiens (Human)	Alpha-synuclein (Non-A beta component of AD amyloid) (Non-A4 component of amyloid precursor) (NACP)	SNCA NACP PARK1	NA	0	1	2 Biotin (K)	0	2	2	43;45;34	NA	TKEGVLYVGSKTK	_TKEGVLYVGSK(bi)TK_;_TKEGVLYVGSK(bi)TK_;_TKEGVLYVGSK(bi)TK_;_TKEGVLYVGSKTK(bi)_;_TKEGVLYVGSK(bi)TK_;_TKEGVLYVGSK(bi)TK_;_TKEGVLYVGSK(bi)TK_;_TKEGVLYVGSK(bi)TK_;_TKEGVLYVGSK(bi)TK_;_TKEGVLYVGSK(bi)TK_;_TKEGVLYVGSKTK(bi)_;_TKEGVLYVGSK(bi)TK_;_TKEGVLYVGSKTK(bi)_;_TKEGVLYVGSK(bi)TK_;_TKEGVLYVGSKTK(bi)_;_TKEGVLYVGSK(bi)TK_;_TKEGVLYVGSK(bi)TK_;_TKEGVLYVGSK(bi)TK_;_TKEGVLYVGSK(bi)TK_;_TKEGVLYVGSK(bi)TK_…	0.00036938	2.94625	5.0612	24.5232	24.3841	24.1262	18.5037	19.3228	20.0234
PF3D7_0202000	Plasmodium falciparum 3D7	knob-associated histidine-rich protein	KAHRP	Previous IDs: PF02_0020;PFB0100c	1	0	Biotin (K);Phospho (STY)	1	1	3	565;561;555	558;559	EATKEASTSKEATKEASTSK	_EATKEASTSKEATK(bi)EASTSK_;_EATKEASTSKEATK(bi)EASTSK_;_EATKEASTSK(bi)EATKEASTSK_;_EATK(bi)EASTSKEATKEASTSK_;_EATKEASTSKEATK(bi)EASTSK_;_EATKEASTSKEATK(bi)EASTSK_;_EATKEASTSK(bi)EATKEASTSK_;_EATK(bi)EASTSKEATKEASTSK_;_EATKEASTSKEATK(bi)EASTSK_;_EATKEASTSKEATK(bi)EASTSK_;_EATKEASTSKEATK(bi)EASTSK_;_EATKEASTSK(bi)EATKEASTSK_;_EATK(bi)EASTSKEATKEASTSK_;_EATK(bi)EASTSKEATKEASTSK_;_EATKEASTSKEATK(bi)EA…	0.000129125	3.21494	5.05395	24.1865	23.7386	23.9389	19.5436	18.5519	18.6066
PF3D7_1016300	Plasmodium falciparum 3D7	GBP130 protein	GBP130	Previous IDs: PF10_0159	1	0	Biotin (K)	0	1	2	254;603;703	NA	HLEIFYKILTNTDPNDEVERR	_HLEIFYK(bi)ILTNTDPNDEVERR_;_HLEIFYK(bi)ILTNTDPNDEVERR_;_HLEIFYK(bi)ILTNTDPNDEVERR_;_HLEIFYK(bi)ILTNTDPNDEVERR_;_HLEIFYK(bi)ILTNTDPNDEVERR_;_HLEIFYK(bi)ILTNTDPNDEVERR_;_HLEIFYK(bi)ILTNTDPNDEVERR_;_HLEIFYK(bi)ILTNTDPNDEVERR_;_HLEIFYK(bi)ILTNTDPNDEVERR_;_HLEIFYK(bi)ILTNTDPNDEVERR_;_HLEIFYK(bi)ILTNTDPNDEVERR_;_HLEIFYK(bi)ILTNTDPNDEVERR_;_HLEIFYK(bi)ILTNTDPNDEVERR_	0.00395807	2.18539	5.04312	24.8903	25.6673	24.1009	21.2671	19.0449	19.2171
PF3D7_0202000	Plasmodium falciparum 3D7	knob-associated histidine-rich protein	KAHRP	Previous IDs: PF02_0020;PFB0100c	1	0	2 Biotin (K)	0	2	2	161;164;157	NA	AYEEKYESKHYK	_AYEEKYESK(bi)HYK_;_AYEEKYESK(bi)HYK_;_AYEEKYESK(bi)HYK_;_AYEEKYESK(bi)HYK_;_AYEEKYESK(bi)HYK_;_AYEEKYESK(bi)HYK_;_AYEEKYESK(bi)HYK_;_AYEEKYESK(bi)HYK_;_AYEEKYESK(bi)HYK_;_AYEEKYESK(bi)HYK_;_AYEEKYESK(bi)HYK_;_AYEEKYESK(bi)HYK_;_AYEEKYESKHYK(bi)_;_AYEEKYESK(bi)HYK_;_AYEEKYESK(bi)HYK_;_AYEEKYESK(bi)HYK_;_AYEEKYESK(bi)HYK_;_AYEEKYESK(bi)HYK_;_AYEEKYESK(bi)HYK_;_AYEEKYESK(bi)HYK_;_AYEEKYESK(bi)HYK_;…	3.48358e-06	4.00278	4.99866	24.1179	24.0102	24.2807	19.2794	19.2204	18.913
PF3D7_0202000	Plasmodium falciparum 3D7	knob-associated histidine-rich protein	KAHRP	Previous IDs: PF02_0020;PFB0100c	1	0	Biotin (K)	0	1	2	541;531;545	NA	TGASTNAATNKGQCAAEGATKGATK	_TGASTNAATNKGQCAAEGATK(bi)GATK_;_TGASTNAATNKGQCAAEGATK(bi)GATK_;_TGASTNAATNK(bi)GQCAAEGATKGATK_;_TGASTNAATNKGQCAAEGATK(bi)GATK_;_TGASTNAATNKGQCAAEGATK(bi)GATK_;_TGASTNAATNK(bi)GQCAAEGATKGATK_;_TGASTNAATNKGQCAAEGATK(bi)GATK_;_TGASTNAATNKGQCAAEGATK(bi)GATK_;_TGASTNAATNKGQCAAEGATK(bi)GATK_;_TGASTNAATNKGQCAAEGATK(bi)GATK_;_TGASTNAATNK(bi)GQCAAEGATKGATK_;_TGASTNAATNKGQCAAEGATK(bi)GATK_;_TGASTNAATNKGQC…	1.61147e-05	3.72948	4.98782	26.9419	26.54	26.875	21.922	21.9908	21.4807
PF3D7_1301400	Plasmodium falciparum 3D7	Plasmodium exported protein (hyp12), unknown function	HYP12	Previous IDs: PF13_0073	1	0	Biotin (K)	0	1	1	259	NA	KNHVICSIIDFR	_K(bi)NHVICSIIDFR_;_K(bi)NHVICSIIDFR_;_K(bi)NHVICSIIDFR_;_K(bi)NHVICSIIDFR_;_K(bi)NHVICSIIDFR_;_K(bi)NHVICSIIDFR_;_K(bi)NHVICSIIDFR_;_K(bi)NHVICSIIDFR_;_K(bi)NHVICSIIDFR_;_K(bi)NHVICSIIDFR_;_K(bi)NHVICSIIDFR_;_K(bi)NHVICSIIDFR_;_K(bi)NHVICSIIDFR_;_K(bi)NHVICSIIDFR_;_K(bi)NHVICSIIDFR_;_K(bi)NHVICSIIDFR_;_K(bi)NHVICSIIDFR_;_K(bi)NHVICSIIDFR_;_K(bi)NHVICSIIDFR_;_K(bi)NHVICSIIDFR_;_K(bi)NHVICSIIDFR_;…	0.000541893	2.83382	4.98674	26.8274	26.9646	26.4203	21.7507	22.5581	20.9432
P00915	Homo sapiens (Human)	Carbonic anhydrase 1 (EC 4.2.1.1) (Carbonate dehydratase I) (Carbonic anhydrase B) (CAB) (Carbonic anhydrase I) (CA-I)	CA1	NA	0	1	Biotin (K)	0	1	2	253	NA	SLLSNVEGDNAVPMQHNNRPTQPLKGR	_SLLSNVEGDNAVPM(ox)QHNNRPTQPLK(bi)GR_;_SLLSNVEGDNAVPM(ox)QHNNRPTQPLK(bi)GR_;_SLLSNVEGDNAVPM(ox)QHNNRPTQPLK(bi)GR_;_SLLSNVEGDNAVPM(ox)QHNNRPTQPLK(bi)GR_;_SLLSNVEGDNAVPM(ox)QHNNRPTQPLK(bi)GR_;_SLLSNVEGDNAVPM(ox)QHNNRPTQPLK(bi)GR_;_SLLSNVEGDNAVPMQHNNRPTQPLK(bi)GR_;_SLLSNVEGDNAVPMQHNNRPTQPLK(bi)GR_;_SLLSNVEGDNAVPMQHNNRPTQPLK(bi)GR_;_SLLSNVEGDNAVPMQHNNRPTQPLK(bi)GR_;_SLLSNVEGDNAVPMQHNNRPTQPLK(bi)GR_;_…	0.00178796	2.46062	4.98655	24.6089	24.0016	24.3892	20.5103	19.2708	18.259
PF3D7_0500800	Plasmodium falciparum 3D7	mature parasite-infected erythrocyte surface antigen	MESA	Previous IDs: MAL5P1.9;PFE0040c	1	0	2 Biotin (K)	0	2	3	1378;1371;1373	NA	ILYNLFLEYNPHMNNKQKAELDKK	_ILYNLFLEYNPHMNNKQKAELDK(bi)K_;_ILYNLFLEYNPHMNNKQKAELDK(bi)K_;_ILYNLFLEYNPHMNNK(bi)QKAELDKK_;_ILYNLFLEYNPHMNNKQKAELDK(bi)K_;_ILYNLFLEYNPHMNNK(bi)QKAELDKK_;_ILYNLFLEYNPHMNNKQKAELDK(bi)K_;_ILYNLFLEYNPHMNNKQKAELDK(bi)K_;_ILYNLFLEYNPHMNNKQKAELDK(bi)K_;_ILYNLFLEYNPHMNNKQKAELDK(bi)K_;_ILYNLFLEYNPHMNNKQKAELDK(bi)K_;_ILYNLFLEYNPHMNNKQK(bi)AELDKK_;_ILYNLFLEYNPHMNNKQKAELDK(bi)K_;_ILYNLFLEYNPHMNNKQKAELDK(bi…	0.000210777	3.09579	4.95547	23.0973	23.4919	23.2808	18.693	18.712	17.5984
PF3D7_0202000	Plasmodium falciparum 3D7	knob-associated histidine-rich protein	KAHRP	Previous IDs: PF02_0020;PFB0100c	1	0	Biotin (K)	0	1	3	541;520;531;545	NA	TDKTGASTNAATNKGQCAAEGATKGATK	_TDKTGASTNAATNKGQCAAEGATK(bi)GATK_;_TDKTGASTNAATNKGQCAAEGATK(bi)GATK_;_TDK(bi)TGASTNAATNKGQCAAEGATKGATK_;_TDKTGASTNAATNK(bi)GQCAAEGATKGATK_;_TDKTGASTNAATNKGQCAAEGATK(bi)GATK_;_TDKTGASTNAATNKGQCAAEGATK(bi)GATK_;_TDK(bi)TGASTNAATNKGQCAAEGATKGATK_;_TDKTGASTNAATNK(bi)GQCAAEGATKGATK_;_TDKTGASTNAATNKGQCAAEGATK(bi)GATK_;_TDKTGASTNAATNKGQCAAEGATK(bi)GATK_;_TDK(bi)TGASTNAATNKGQCAAEGATKGATK_;_TDKTGASTNAATN…	6.32237e-06	3.89467	4.9543	24.4195	24.3708	24.7401	19.7429	19.559	19.3657
PF3D7_1149100	Plasmodium falciparum 3D7	Plasmodium exported protein, unknown function	N/A	Previous IDs: PF11_0508;PF3D7_1149100.1;PF3D7_1149100.2	1	0	Biotin (K)	0	1	2	407	NA	EKNETQEESLNKLSTK	_EKNETQEESLNK(bi)LSTK_;_EKNETQEESLNK(bi)LSTK_;_EKNETQEESLNK(bi)LSTK_;_EKNETQEESLNK(bi)LSTK_;_EKNETQEESLNK(bi)LSTK_;_EKNETQEESLNK(bi)LSTK_;_EKNETQEESLNK(bi)LSTK_;_EKNETQEESLNK(bi)LSTK_;_EKNETQEESLNK(bi)LSTK_;_EKNETQEESLNK(bi)LSTK_	0.00503506	2.09653	4.86675	23.7565	23.6205	24.1387	18.5275	17.76	20.6279
PF3D7_1301400	Plasmodium falciparum 3D7	Plasmodium exported protein (hyp12), unknown function	HYP12	Previous IDs: PF13_0073	1	0	Biotin (K)	0	1	1	248	NA	LYKQIEPDIEK	_LYK(bi)QIEPDIEK_;_LYK(bi)QIEPDIEK_;_LYK(bi)QIEPDIEK_;_LYK(bi)QIEPDIEK_;_LYK(bi)QIEPDIEK_;_LYK(bi)QIEPDIEK_;_LYK(bi)QIEPDIEK_;_LYK(bi)QIEPDIEK_;_LYK(bi)QIEPDIEK_	8.74092e-05	3.32163	4.85756	23.9616	23.6754	23.995	19.582	18.8144	18.6629
PF3D7_0201900	Plasmodium falciparum 3D7	erythrocyte membrane protein 3	EMP3	Previous IDs: PF02_0019;PFB0095c	1	0	Biotin (K)	0	1	2	1889;2019;2084;2201;2240;2279;1894;2024;2089;2206;2245;2284	NA	NTPSEGQQNTGLKNAANKGQQNTGLK	_NTPSEGQQNTGLK(bi)NAANKGQQNTGLK_;_NTPSEGQQNTGLKNAANK(bi)GQQNTGLK_;_NTPSEGQQNTGLK(bi)NAANKGQQNTGLK_;_NTPSEGQQNTGLKNAANK(bi)GQQNTGLK_;_NTPSEGQQNTGLK(bi)NAANKGQQNTGLK_;_NTPSEGQQNTGLKNAANK(bi)GQQNTGLK_;_NTPSEGQQNTGLK(bi)NAANKGQQNTGLK_;_NTPSEGQQNTGLK(bi)NAANKGQQNTGLK_;_NTPSEGQQNTGLKNAANK(bi)GQQNTGLK_;_NTPSEGQQNTGLK(bi)NAANKGQQNTGLK_;_NTPSEGQQNTGLKNAANK(bi)GQQNTGLK_	0.000825211	2.70309	4.85381	23.1837	23.1478	23.365	17.5345	19.3614	18.2392
PF3D7_0202000	Plasmodium falciparum 3D7	knob-associated histidine-rich protein	KAHRP	Previous IDs: PF02_0020;PFB0100c	1	0	Biotin (K)	0	1	1	585	NA	GATKEASTTEGATK	_GATK(bi)EASTTEGATK_;_GATK(bi)EASTTEGATK_;_GATK(bi)EASTTEGATK_;_GATK(bi)EASTTEGATK_;_GATK(bi)EASTTEGATK_;_GATK(bi)EASTTEGATK_;_GATK(bi)EASTTEGATK_;_GATK(bi)EASTTEGATK_;_GATK(bi)EASTTEGATK_;_GATK(bi)EASTTEGATK_;_GATK(bi)EASTTEGATK_	1.24062e-05	3.78405	4.83111	23.4935	23.2436	23.8747	18.7145	18.6915	18.7124
PF3D7_0500800	Plasmodium falciparum 3D7	mature parasite-infected erythrocyte surface antigen	MESA	Previous IDs: MAL5P1.9;PFE0040c	1	0	2 Biotin (K)	0	2	3	316;313	NA	IYEETKYNKITSEFRETENVK	_IYEETKYNK(bi)ITSEFRETENVK_;_IYEETKYNK(bi)ITSEFRETENVK_;_IYEETK(bi)YNKITSEFRETENVK_;_IYEETKYNK(bi)ITSEFRETENVK_;_IYEETK(bi)YNKITSEFRETENVK_;_IYEETK(bi)YNKITSEFRETENVK_;_IYEETKYNK(bi)ITSEFRETENVK_;_IYEETKYNK(bi)ITSEFRETENVK_;_IYEETKYNK(bi)ITSEFRETENVK_;_IYEETKYNK(bi)ITSEFRETENVK_;_IYEETKYNK(bi)ITSEFRETENVK_;_IYEETK(bi)YNKITSEFRETENVK_;_IYEETK(bi)YNKITSEFRETENVK_;_IYEETKYNK(bi)ITSEFRETENVK_;_IYEETK…	0.000565159	2.82078	4.82776	23.6089	24.5518	23.163	18.5063	18.937	19.3972
P16157	Homo sapiens (Human)	Ankyrin-1 (ANK-1) (Ankyrin-R) (Erythrocyte ankyrin)	ANK1 ANK	NA	0	1	Biotin (K)	0	1	3	841;849	NA	DSRDVDEEKELLDFVPKLDQVVESPAIPR	_DSRDVDEEK(bi)ELLDFVPKLDQVVESPAIPR_;_DSRDVDEEK(bi)ELLDFVPKLDQVVESPAIPR_;_DSRDVDEEK(bi)ELLDFVPKLDQVVESPAIPR_;_DSRDVDEEK(bi)ELLDFVPKLDQVVESPAIPR_;_DSRDVDEEK(bi)ELLDFVPKLDQVVESPAIPR_;_DSRDVDEEK(bi)ELLDFVPKLDQVVESPAIPR_;_DSRDVDEEKELLDFVPK(bi)LDQVVESPAIPR_;_DSRDVDEEK(bi)ELLDFVPKLDQVVESPAIPR_	0.000864446	2.68839	4.8157	24.5349	24.6967	23.2306	19.5145	19.698	18.8027
P37840	Homo sapiens (Human)	Alpha-synuclein (Non-A beta component of AD amyloid) (Non-A4 component of amyloid precursor) (NACP)	SNCA NACP PARK1	NA	0	1	Biotin (K)	0	1	3	32;34	NA	TKQGVAEAAGKTKEGVLYVGSK	_TKQGVAEAAGK(bi)TKEGVLYVGSK_;_TKQGVAEAAGK(bi)TKEGVLYVGSK_;_TKQGVAEAAGK(bi)TKEGVLYVGSK_;_TKQGVAEAAGKTK(bi)EGVLYVGSK_;_TKQGVAEAAGK(bi)TKEGVLYVGSK_;_TKQGVAEAAGK(bi)TKEGVLYVGSK_;_TKQGVAEAAGK(bi)TKEGVLYVGSK_;_TKQGVAEAAGK(bi)TKEGVLYVGSK_;_TKQGVAEAAGKTK(bi)EGVLYVGSK_;_TKQGVAEAAGKTK(bi)EGVLYVGSK_;_TKQGVAEAAGK(bi)TKEGVLYVGSK_;_TKQGVAEAAGK(bi)TKEGVLYVGSK_;_TKQGVAEAAGK(bi)TKEGVLYVGSK_;_TKQGVAEAAGK(bi)TKEGVL…	0.00126658	2.5717	4.78639	23.9175	24.0355	23.6087	18.7417	18.2707	20.1901
PF3D7_0500800	Plasmodium falciparum 3D7	mature parasite-infected erythrocyte surface antigen	MESA	Previous IDs: MAL5P1.9;PFE0040c	1	0	Biotin (K)	0	1	2	1156	NA	KDVIEQEIVSEEVNEKDTK	_K(bi)DVIEQEIVSEEVNEKDTK_;_K(bi)DVIEQEIVSEEVNEKDTK_;_K(bi)DVIEQEIVSEEVNEKDTK_;_K(bi)DVIEQEIVSEEVNEKDTK_;_K(bi)DVIEQEIVSEEVNEKDTK_;_K(bi)DVIEQEIVSEEVNEKDTK_;_K(bi)DVIEQEIVSEEVNEKDTK_;_K(bi)DVIEQEIVSEEVNEKDTK_;_K(bi)DVIEQEIVSEEVNEKDTK_;_K(bi)DVIEQEIVSEEVNEKDTK_;_K(bi)DVIEQEIVSEEVNEKDTK_;_K(bi)DVIEQEIVSEEVNEKDTK_;_K(bi)DVIEQEIVSEEVNEKDTK_;_K(bi)DVIEQEIVSEEVNEKDTK_;_K(bi)DVIEQEIVSEEVNEKDTK_;_K(bi)DVI…	0.000933101	2.65948	4.78584	26.7665	27.3988	26.5545	21.8202	23.0668	21.4753
PF3D7_0102200	Plasmodium falciparum 3D7	ring-infected erythrocyte surface antigen	RESA	Previous IDs: MAL1P1.13;PFA0110w	1	0	Biotin (K)	0	1	2	312	NA	IMNSDISSFKHINELKSLEHR	_IMNSDISSFKHINELK(bi)SLEHR_;_IMNSDISSFKHINELK(bi)SLEHR_;_IMNSDISSFKHINELK(bi)SLEHR_;_IMNSDISSFKHINELK(bi)SLEHR_;_IMNSDISSFKHINELK(bi)SLEHR_;_IMNSDISSFKHINELK(bi)SLEHR_;_IMNSDISSFKHINELK(bi)SLEHR_;_IMNSDISSFKHINELK(bi)SLEHR_;_IMNSDISSFKHINELK(bi)SLEHR_;_IMNSDISSFKHINELK(bi)SLEHR_;_IMNSDISSFKHINELK(bi)SLEHR_;_IMNSDISSFKHINELK(bi)SLEHR_;_IMNSDISSFKHINELK(bi)SLEHR_;_IMNSDISSFKHINELK(bi)SLEHR_;_IMNSDI…	9.03958e-05	3.3123	4.77913	24.6527	24.2531	24.1009	20.0499	19.3845	19.2349
PF3D7_0202000	Plasmodium falciparum 3D7	knob-associated histidine-rich protein	KAHRP	Previous IDs: PF02_0020;PFB0100c	1	0	Biotin (K)	0	1	2	500;491	NA	KVDSTSADNKSTNAATPGAK	_KVDSTSADNK(bi)STNAATPGAK_;_K(bi)VDSTSADNKSTNAATPGAK_;_KVDSTSADNK(bi)STNAATPGAK_;_KVDSTSADNK(bi)STNAATPGAK_;_KVDSTSADNK(bi)STNAATPGAK_;_KVDSTSADNK(bi)STNAATPGAK_;_KVDSTSADNK(bi)STNAATPGAK_;_KVDSTSADNK(bi)STNAATPGAK_;_KVDSTSADNK(bi)STNAATPGAK_;_K(bi)VDSTSADNKSTNAATPGAK_;_KVDSTSADNK(bi)STNAATPGAK_;_K(bi)VDSTSADNKSTNAATPGAK_;_K(bi)VDSTSADNKSTNAATPGAK_;_KVDSTSADNK(bi)STNAATPGAK_;_KVDSTSADNK(bi)STNAAT…	3.78499e-06	3.99315	4.73911	24.6364	24.6149	24.9028	20.1461	19.8117	19.9789
PF3D7_0532300	Plasmodium falciparum 3D7	Plasmodium exported protein (PHISTb), unknown function	N/A	Previous IDs: MAL5P1.314;PFE1600w	1	0	2 Biotin (K)	0	2	2	338;335;332	NA	GIDLSNVNYDDHFKNGKFLK	_GIDLSNVNYDDHFKNGKFLK(bi)_;_GIDLSNVNYDDHFKNGKFLK(bi)_;_GIDLSNVNYDDHFKNGK(bi)FLK_;_GIDLSNVNYDDHFKNGK(bi)FLK_;_GIDLSNVNYDDHFKNGK(bi)FLK_;_GIDLSNVNYDDHFKNGK(bi)FLK_;_GIDLSNVNYDDHFKNGKFLK(bi)_;_GIDLSNVNYDDHFKNGKFLK(bi)_;_GIDLSNVNYDDHFKNGKFLK(bi)_;_GIDLSNVNYDDHFKNGKFLK(bi)_;_GIDLSNVNYDDHFKNGK(bi)FLK_;_GIDLSNVNYDDHFKNGK(bi)FLK_;_GIDLSNVNYDDHFKNGKFLK(bi)_;_GIDLSNVNYDDHFKNGK(bi)FLK_;_GIDLSNVNYDDHFKNGK(bi…	2.52624e-05	3.62206	4.6917	23.4195	23.8572	23.6944	19.2047	18.6347	19.0566
PF3D7_0500800	Plasmodium falciparum 3D7	mature parasite-infected erythrocyte surface antigen	MESA	Previous IDs: MAL5P1.9;PFE0040c	1	0	Biotin (K)	0	1	3	1186;1185;1192	NA	VKKPIDDCKK	_VKK(bi)PIDDCKK_;_VKK(bi)PIDDCKK_;_VKK(bi)PIDDCKK_;_VKK(bi)PIDDCKK_;_VKK(bi)PIDDCKK_;_VK(bi)KPIDDCKK_;_VKK(bi)PIDDCKK_;_VKK(bi)PIDDCKK_;_VK(bi)KPIDDCKK_;_VKK(bi)PIDDCKK_;_VKK(bi)PIDDCKK_;_VKKPIDDCK(bi)K_;_VKK(bi)PIDDCKK_;_VKK(bi)PIDDCKK_;_VKK(bi)PIDDCKK_;_VKK(bi)PIDDCKK_;_VKK(bi)PIDDCKK_;_VKK(bi)PIDDCKK_;_VKK(bi)PIDDCKK_;_VKK(bi)PIDDCKK_;_VKK(bi)PIDDCKK_;_VKK(bi)PIDDCKK_;_VK(bi)K(bi)PIDDCKK_;_VK(…	8.15065e-06	3.88758	4.68386	24.0044	23.7991	24.0086	19.0432	19.187	19.5304
PF3D7_0532400	Plasmodium falciparum 3D7	lysine-rich membrane-associated PHISTb protein	LyMP	Previous IDs: MAL5P1.315;PFE1605w	1	0	Biotin (K);Oxidation (M)	0	1	1	414	NA	KNPEMLTENQINEEENENTK	_K(bi)NPEM(ox)LTENQINEEENENTK_;_K(bi)NPEM(ox)LTENQINEEENENTK_;_K(bi)NPEM(ox)LTENQINEEENENTK_;_K(bi)NPEM(ox)LTENQINEEENENTK_;_K(bi)NPEM(ox)LTENQINEEENENTK_;_K(bi)NPEM(ox)LTENQINEEENENTK_;_K(bi)NPEM(ox)LTENQINEEENENTK_;_K(bi)NPEM(ox)LTENQINEEENENTK_;_K(bi)NPEM(ox)LTENQINEEENENTK_;_K(bi)NPEM(ox)LTENQINEEENENTK_;_K(bi)NPEM(ox)LTENQINEEENENTK_;_K(bi)NPEM(ox)LTENQINEEENENTK_;_K(bi)NPEM(ox)LTENQINEEENEN…	3.35374e-05	3.55354	4.67786	23.6418	23.4037	23.1413	18.4359	19.0436	18.6738
PF3D7_1016300	Plasmodium falciparum 3D7	GBP130 protein	GBP130	Previous IDs: PF10_0159	1	0	Biotin (K)	0	1	2	803	NA	HLEVFHKILTNTDPNDEVERQNADNNEA	_HLEVFHK(bi)ILTNTDPNDEVERQNADNNEA_;_HLEVFHK(bi)ILTNTDPNDEVERQNADNNEA_;_HLEVFHK(bi)ILTNTDPNDEVERQNADNNEA_;_HLEVFHK(bi)ILTNTDPNDEVERQNADNNEA_;_HLEVFHK(bi)ILTNTDPNDEVERQNADNNEA_;_HLEVFHK(bi)ILTNTDPNDEVERQNADNNEA_;_HLEVFHK(bi)ILTNTDPNDEVERQNADNNEA_;_HLEVFHK(bi)ILTNTDPNDEVERQNADNNEA_;_HLEVFHK(bi)ILTNTDPNDEVERQNADNNEA_	0.00759133	1.94906	4.64945	24.674	24.4796	23.8234	19.5203	18.206	21.3024
PF3D7_0113000	Plasmodium falciparum 3D7	glutamic acid-rich protein GARP	GARP	Previous IDs: MAL1P3.06;PFA0620c	1	0	Biotin (K);Oxidation (M)	0	1	2	497;503;499	NA	LIDEPEQLTLMDKSKVEEK	_LIDEPEQLTLM(ox)DK(bi)SKVEEK_;_LIDEPEQLTLM(ox)DK(bi)SKVEEK_;_LIDEPEQLTLM(ox)DKSKVEEK(bi)_;_LIDEPEQLTLM(ox)DK(bi)SKVEEK_;_LIDEPEQLTLM(ox)DK(bi)SKVEEK_;_LIDEPEQLTLM(ox)DKSKVEEK(bi)_;_LIDEPEQLTLM(ox)DK(bi)SKVEEK_;_LIDEPEQLTLM(ox)DK(bi)SKVEEK_;_LIDEPEQLTLM(ox)DK(bi)SKVEEK_;_LIDEPEQLTLM(ox)DKSKVEEK(bi)_;_LIDEPEQLTLM(ox)DK(bi)SKVEEK_;_LIDEPEQLTLM(ox)DKSK(bi)VEEK_;_LIDEPEQLTLM(ox)DK(bi)SKVEEK_;_LIDEPEQL…	0.00155104	2.5064	4.638	23.0088	23.1664	24.6383	18.3703	19.4123	19.1169
PF3D7_0730900	Plasmodium falciparum 3D7	EMP1-trafficking protein	PTP4	Previous IDs: MAL7P1.171	1	0	Biotin (K)	0	1	3	783;893;782;892;774;884	NA	NYVSEFKNNFDGCLKKEVSVPR	_NYVSEFKNNFDGCLKK(bi)EVSVPR_;_NYVSEFKNNFDGCLKK(bi)EVSVPR_;_NYVSEFKNNFDGCLKK(bi)EVSVPR_;_NYVSEFKNNFDGCLKK(bi)EVSVPR_;_NYVSEFKNNFDGCLKK(bi)EVSVPR_;_NYVSEFKNNFDGCLKK(bi)EVSVPR_;_NYVSEFKNNFDGCLKK(bi)EVSVPR_;_NYVSEFKNNFDGCLKK(bi)EVSVPR_;_NYVSEFKNNFDGCLKK(bi)EVSVPR_;_NYVSEFKNNFDGCLKK(bi)EVSVPR_;_NYVSEFKNNFDGCLKK(bi)EVSVPR_;_NYVSEFKNNFDGCLKK(bi)EVSVPR_;_NYVSEFKNNFDGCLKK(bi)EVSVPR_;_NYVSEFKNNFDGCLKK(bi)E…	0.0356012	1.36454	4.6354	25.5781	25.5371	25.4506	19.5314	23.8553	19.2729
PF3D7_0201900	Plasmodium falciparum 3D7	erythrocyte membrane protein 3	EMP3	Previous IDs: PF02_0019;PFB0095c	1	0	Biotin (K)	0	1	2	1317;1314	NA	NKDLKSIGNMEQQNTGLK	_NKDLK(bi)SIGNM(ox)EQQNTGLK_;_NKDLK(bi)SIGNM(ox)EQQNTGLK_;_NKDLK(bi)SIGNM(ox)EQQNTGLK_;_NKDLK(bi)SIGNM(ox)EQQNTGLK_;_NKDLK(bi)SIGNM(ox)EQQNTGLK_;_NKDLK(bi)SIGNM(ox)EQQNTGLK_;_NKDLK(bi)SIGNMEQQNTGLK_;_NKDLK(bi)SIGNMEQQNTGLK_;_NKDLK(bi)SIGNMEQQNTGLK_;_NKDLK(bi)SIGNMEQQNTGLK_;_NKDLK(bi)SIGNMEQQNTGLK_;_NKDLK(bi)SIGNMEQQNTGLK_;_NK(bi)DLK(bi)SIGNM(ox)EQQNTGLK_;_NK(bi)DLK(bi)SIGNM(ox)EQQNTGLK_;_NK(bi)DL…	8.49354e-07	4.13311	4.63232	23.631	23.3642	23.6259	18.8835	18.943	18.8976
PF3D7_1016300	Plasmodium falciparum 3D7	GBP130 protein	GBP130	Previous IDs: PF10_0159	1	0	Biotin (K)	0	1	2	304;753	NA	HLEIFYKILTNTDPNDDVERR	_HLEIFYK(bi)ILTNTDPNDDVERR_;_HLEIFYK(bi)ILTNTDPNDDVERR_;_HLEIFYK(bi)ILTNTDPNDDVERR_;_HLEIFYK(bi)ILTNTDPNDDVERR_;_HLEIFYK(bi)ILTNTDPNDDVERR_;_HLEIFYK(bi)ILTNTDPNDDVERR_;_HLEIFYK(bi)ILTNTDPNDDVERR_;_HLEIFYK(bi)ILTNTDPNDDVERR_;_HLEIFYK(bi)ILTNTDPNDDVERR_;_HLEIFYK(bi)ILTNTDPNDDVERR_;_HLEIFYK(bi)ILTNTDPNDDVERR_;_HLEIFYK(bi)ILTNTDPNDDVERR_;_HLEIFYK(bi)ILTNTDPNDDVERR_;_HLEIFYK(bi)ILTNTDPNDDVERR_	0.000357676	2.95404	4.62953	24.4195	24.67	23.373	19.6627	19.3077	19.6034
PF3D7_0401800	Plasmodium falciparum 3D7	Plasmodium exported protein (PHISTb), unknown function	PfD80	Previous IDs: MAL4P1.16;PFD0080c	1	0	Biotin (K)	0	1	2	397;390;399	NA	TKDPNMFNKNK	_TKDPNM(ox)FNK(bi)NK_;_TKDPNM(ox)FNK(bi)NK_;_TKDPNM(ox)FNK(bi)NK_;_TKDPNM(ox)FNK(bi)NK_;_TKDPNM(ox)FNK(bi)NK_;_TKDPNM(ox)FNK(bi)NK_;_TKDPNM(ox)FNK(bi)NK_;_TK(bi)DPNMFNKNK_;_TKDPNMFNK(bi)NK_;_TKDPNMFNK(bi)NK_;_TKDPNMFNK(bi)NK_;_TK(bi)DPNMFNKNK_;_TKDPNMFNKNK(bi)_;_TKDPNMFNK(bi)NK_;_TK(bi)DPNMFNKNK_;_TKDPNMFNK(bi)NK_;_TKDPNMFNK(bi)NK_;_TK(bi)DPNMFNKNK_;_TKDPNMFNKNK(bi)_;_TKDPNMFNK(bi)NK_;_TK(bi)DPNM…	8.20746e-05	3.33094	4.62601	23.825	23.1952	23.7625	19.1108	18.5732	19.2206
PF3D7_0401800	Plasmodium falciparum 3D7	Plasmodium exported protein (PHISTb), unknown function	PfD80	Previous IDs: MAL4P1.16;PFD0080c	1	0	Biotin (K)	0	1	1	390	NA	TKDPNMFNK	_TK(bi)DPNM(ox)FNK_;_TK(bi)DPNM(ox)FNK_;_TK(bi)DPNM(ox)FNK_;_TK(bi)DPNM(ox)FNK_;_TK(bi)DPNM(ox)FNK_;_TK(bi)DPNM(ox)FNK_;_TK(bi)DPNM(ox)FNK_;_TK(bi)DPNM(ox)FNK_;_TK(bi)DPNM(ox)FNK_;_TK(bi)DPNM(ox)FNK_;_TK(bi)DPNM(ox)FNK_;_TK(bi)DPNM(ox)FNK_;_TK(bi)DPNM(ox)FNK_;_TK(bi)DPNM(ox)FNK_;_TK(bi)DPNMFNK_;_TK(bi)DPNMFNK_;_TK(bi)DPNMFNK_;_TK(bi)DPNMFNK_;_TK(bi)DPNMFNK_;_TK(bi)DPNMFNK_;_TK(bi)DPNMFNK_;_TK(bi)…	2.96038e-05	3.57781	4.58499	25.3842	25.0481	25.5475	20.5609	20.6044	21.0595
PF3D7_0202000	Plasmodium falciparum 3D7	knob-associated histidine-rich protein	KAHRP	Previous IDs: PF02_0020;PFB0100c	1	0	Biotin (K)	0	1	2	555;575;551;571	NA	EASTSKEATKEASTSK	_EASTSKEATK(bi)EASTSK_;_EASTSKEATK(bi)EASTSK_;_EASTSK(bi)EATKEASTSK_;_EASTSKEATK(bi)EASTSK_;_EASTSKEATK(bi)EASTSK_;_EASTSK(bi)EATKEASTSK_;_EASTSK(bi)EATKEASTSK_;_EASTSKEATK(bi)EASTSK_;_EASTSKEATK(bi)EASTSK_;_EASTSK(bi)EATKEASTSK_;_EASTSKEATK(bi)EASTSK_;_EASTSKEATK(bi)EASTSK_;_EASTSK(bi)EATKEASTSK_;_EASTSK(bi)EATKEASTSK_;_EASTSKEATK(bi)EASTSK_;_EASTSKEATK(bi)EASTSK_;_EASTSK(bi)EATKEASTSK_;_EASTSKE…	5.09071e-05	3.45623	4.55855	24.179	23.7991	24.3997	19.8597	19.2569	19.5856
PF3D7_0202000	Plasmodium falciparum 3D7	knob-associated histidine-rich protein	KAHRP	Previous IDs: PF02_0020;PFB0100c	1	0	Biotin (K)	0	1	3	354;359;351;364	NA	YSSFSSVNKYGKHGDEKHHSSK	_YSSFSSVNKYGK(bi)HGDEKHHSSK_;_YSSFSSVNKYGK(bi)HGDEKHHSSK_;_YSSFSSVNKYGK(bi)HGDEKHHSSK_;_YSSFSSVNKYGK(bi)HGDEKHHSSK_;_YSSFSSVNKYGK(bi)HGDEKHHSSK_;_YSSFSSVNKYGK(bi)HGDEKHHSSK_;_YSSFSSVNKYGK(bi)HGDEKHHSSK_;_YSSFSSVNKYGK(bi)HGDEKHHSSK_;_YSSFSSVNKYGK(bi)HGDEKHHSSK_;_YSSFSSVNKYGKHGDEK(bi)HHSSK_;_YSSFSSVNKYGK(bi)HGDEKHHSSK_;_YSSFSSVNKYGK(bi)HGDEKHHSSK_;_YSSFSSVNKYGK(bi)HGDEKHHSSK_;_YSSFSSVNKYGK(bi)HGDEK…	2.84649e-05	3.59112	4.53207	26.5667	26.5894	26.7706	22.0234	22.4957	21.8114
PF3D7_0201900	Plasmodium falciparum 3D7	erythrocyte membrane protein 3	EMP3	Previous IDs: PF02_0019;PFB0095c	1	0	Biotin (K)	0	1	1	1335;1465	NA	NTPSKGQQNTGLK	_NTPSK(bi)GQQNTGLK_;_NTPSK(bi)GQQNTGLK_;_NTPSK(bi)GQQNTGLK_;_NTPSK(bi)GQQNTGLK_;_NTPSK(bi)GQQNTGLK_;_NTPSK(bi)GQQNTGLK_	0.00108014	2.61546	4.52992	22.3819	22.4104	22.6817	17.2943	17.5856	19.0044
PF3D7_1476200	Plasmodium falciparum 3D7	Plasmodium exported protein (PHISTb), unknown function	N/A	Previous IDs: PF14_0730;PF14_0731	1	0	Biotin (K)	0	1	1	194	NA	NVPTKIDVK	_NVPTK(bi)IDVK_;_NVPTK(bi)IDVK_;_NVPTK(bi)IDVK_;_NVPTK(bi)IDVK_;_NVPTK(bi)IDVK_;_NVPTK(bi)IDVK_;_NVPTK(bi)IDVK_	0.00212593	2.40082	4.52302	22.9932	23.1136	22.8802	17.3144	19.5127	18.5907
PF3D7_0102200	Plasmodium falciparum 3D7	ring-infected erythrocyte surface antigen	RESA	Previous IDs: MAL1P1.13;PFA0110w	1	0	Biotin (K)	0	1	3	312	NA	KIMNSDISSFKHINELKSLEHR	_KIMNSDISSFKHINELK(bi)SLEHR_;_KIMNSDISSFKHINELK(bi)SLEHR_;_KIMNSDISSFKHINELK(bi)SLEHR_;_KIMNSDISSFKHINELK(bi)SLEHR_;_KIMNSDISSFKHINELK(bi)SLEHR_;_KIMNSDISSFKHINELK(bi)SLEHR_;_KIMNSDISSFKHINELK(bi)SLEHR_;_KIMNSDISSFKHINELK(bi)SLEHR_;_KIMNSDISSFKHINELK(bi)SLEHR_;_KIMNSDISSFKHINELK(bi)SLEHR_;_KIMNSDISSFKHINELK(bi)SLEHR_;_KIMNSDISSFKHINELK(bi)SLEHR_;_KIM(ox)NSDISSFKHINELK(bi)SLEHR_;_KIM(ox)NSDISSFKHI…	2.14847e-05	3.65429	4.51689	23.4195	23.598	23.4347	19.0399	19.2514	18.6102
PF3D7_0202000	Plasmodium falciparum 3D7	knob-associated histidine-rich protein	KAHRP	Previous IDs: PF02_0020;PFB0100c	1	0	2 Biotin (K)	0	2	2	520;531	NA	TDKTGASTNAATNKGQCAAEGATK	_TDK(bi)TGASTNAATNKGQCAAEGATK_;_TDK(bi)TGASTNAATNKGQCAAEGATK_;_TDKTGASTNAATNK(bi)GQCAAEGATK_;_TDK(bi)TGASTNAATNKGQCAAEGATK_;_TDK(bi)TGASTNAATNKGQCAAEGATK_;_TDKTGASTNAATNK(bi)GQCAAEGATK_;_TDK(bi)TGASTNAATNKGQCAAEGATK_;_TDKTGASTNAATNK(bi)GQCAAEGATK_;_TDK(bi)TGASTNAATNKGQCAAEGATK_;_TDKTGASTNAATNK(bi)GQCAAEGATK_;_TDKTGASTNAATNK(bi)GQCAAEGATK_;_TDK(bi)TGASTNAATNKGQCAAEGATK_;_TDKTGASTNAATNK(bi)GQCAAEGA…	2.81049e-06	4.00278	4.47414	23.1447	22.9769	23.1838	18.752	18.4331	18.6979
PF3D7_0202000	Plasmodium falciparum 3D7	knob-associated histidine-rich protein	KAHRP	Previous IDs: PF02_0020;PFB0100c	1	0	Biotin (K);Oxidation (M)	0	1	2	623;617	NA	GASTTAGSTTGATTGANAVQSKDETADKNAANNGEQVMSR	_GASTTAGSTTGATTGANAVQSKDETADK(bi)NAANNGEQVM(ox)SR_;_GASTTAGSTTGATTGANAVQSK(bi)DETADKNAANNGEQVM(ox)SR_;_GASTTAGSTTGATTGANAVQSK(bi)DETADKNAANNGEQVM(ox)SR_;_GASTTAGSTTGATTGANAVQSK(bi)DETADKNAANNGEQVM(ox)SR_;_GASTTAGSTTGATTGANAVQSK(bi)DETADKNAANNGEQVM(ox)SR_;_GASTTAGSTTGATTGANAVQSK(bi)DETADKNAANNGEQVM(ox)SR_;_GASTTAGSTTGATTGANAVQSK(bi)DETADKNAANNGEQVM(ox)SR_;_GASTTAGSTTGATTGANAVQSK(bi)DETADKNAANNGEQV…	0.00119859	2.58807	4.44855	23.6089	22.7015	24.3468	19.0422	18.6892	19.5802
PF3D7_1149100	Plasmodium falciparum 3D7	Plasmodium exported protein, unknown function	N/A	Previous IDs: PF11_0508;PF3D7_1149100.1;PF3D7_1149100.2	1	0	Biotin (K)	0	1	1	411	NA	LSTKNSTNDSIK	_LSTK(bi)NSTNDSIK_;_LSTK(bi)NSTNDSIK_;_LSTK(bi)NSTNDSIK_;_LSTK(bi)NSTNDSIK_;_LSTK(bi)NSTNDSIK_;_LSTK(bi)NSTNDSIK_;_LSTK(bi)NSTNDSIK_;_LSTK(bi)NSTNDSIK_	0.000933613	2.65948	4.44424	23.1884	22.9358	23.2432	17.7504	19.4562	18.8281
PF3D7_0500800	Plasmodium falciparum 3D7	mature parasite-infected erythrocyte surface antigen	MESA	Previous IDs: MAL5P1.9;PFE0040c	1	0	Biotin (K)	0	1	2	190	NA	ELQFIKLRDR	_ELQFIK(bi)LRDR_;_ELQFIK(bi)LRDR_;_ELQFIK(bi)LRDR_;_ELQFIK(bi)LRDR_;_ELQFIK(bi)LRDR_;_ELQFIK(bi)LRDR_;_ELQFIK(bi)LRDR_;_ELQFIK(bi)LRDR_;_ELQFIK(bi)LRDR_;_ELQFIK(bi)LRDR_;_ELQFIK(bi)LRDR_;_ELQFIK(bi)LRDR_;_ELQFIK(bi)LRDR_;_ELQFIK(bi)LRDR_;_ELQFIK(bi)LRDR_;_ELQFIK(bi)LRDR_;_ELQFIK(bi)LRDR_;_ELQFIK(bi)LRDR_;_ELQFIK(bi)LRDR_;_ELQFIK(bi)LRDR_;_ELQFIK(bi)LRDR_;_ELQFIK(bi)LRDR_;_ELQFIK(bi)LRDR_;_ELQFIK(…	0.00369747	2.21014	4.43405	30.1612	29.8184	30.2644	24.2271	26.5252	26.1896
PF3D7_0500800	Plasmodium falciparum 3D7	mature parasite-infected erythrocyte surface antigen	MESA	Previous IDs: MAL5P1.9;PFE0040c	1	0	Biotin (K)	0	1	1	135	NA	NNCLQHIKLLEMQESER	_NNCLQHIK(bi)LLEMQESER_;_NNCLQHIK(bi)LLEMQESER_;_NNCLQHIK(bi)LLEMQESER_;_NNCLQHIK(bi)LLEMQESER_;_NNCLQHIK(bi)LLEMQESER_;_NNCLQHIK(bi)LLEMQESER_;_NNCLQHIK(bi)LLEMQESER_	0.000285328	3.01679	4.42868	22.7913	22.4083	22.3056	18.2864	18.5282	17.4045
PF3D7_0201900	Plasmodium falciparum 3D7	erythrocyte membrane protein 3	EMP3	Previous IDs: PF02_0019;PFB0095c	1	0	Biotin (K)	0	1	1	1356;1395;1421;1551;1616;1668;1720;1772;1798;1850;1876;1928;1967;2006;2045;2071;2123;2149;2188;2214;2253;2318;2344	NA	QQNTGLKNTPSEGQQNTGLK	_QQNTGLK(bi)NTPSEGQQNTGLK_;_QQNTGLK(bi)NTPSEGQQNTGLK_;_QQNTGLK(bi)NTPSEGQQNTGLK_;_QQNTGLK(bi)NTPSEGQQNTGLK_;_QQNTGLK(bi)NTPSEGQQNTGLK_;_QQNTGLK(bi)NTPSEGQQNTGLK_;_QQNTGLK(bi)NTPSEGQQNTGLK_;_QQNTGLK(bi)NTPSEGQQNTGLK_	0.000102374	3.28201	4.42771	23.674	23.3775	23.6602	18.765	19.6653	18.9982
PF3D7_1016300	Plasmodium falciparum 3D7	GBP130 protein	GBP130	Previous IDs: PF10_0159	1	0	Biotin (K)	0	1	3	354;404;453;503;347;397;446;496	NA	KHLEVFHKILTNTDPNDEVERR	_KHLEVFHK(bi)ILTNTDPNDEVERR_;_KHLEVFHK(bi)ILTNTDPNDEVERR_;_K(bi)HLEVFHKILTNTDPNDEVERR_;_KHLEVFHK(bi)ILTNTDPNDEVERR_;_KHLEVFHK(bi)ILTNTDPNDEVERR_;_KHLEVFHK(bi)ILTNTDPNDEVERR_;_KHLEVFHK(bi)ILTNTDPNDEVERR_;_K(bi)HLEVFHKILTNTDPNDEVERR_	0.181631	0.703315	4.42478	17.3985	25.16	25.9137	19.0271	18.1673	18.0035
PF3D7_0202000	Plasmodium falciparum 3D7	knob-associated histidine-rich protein	KAHRP	Previous IDs: PF02_0020;PFB0100c	1	0	2 Biotin (K)	0	2	2	541;531;545	NA	TGASTNAATNKGQCAAEGATKGATK	_TGASTNAATNKGQCAAEGATK(bi)GATK_;_TGASTNAATNKGQCAAEGATK(bi)GATK_;_TGASTNAATNK(bi)GQCAAEGATKGATK_;_TGASTNAATNKGQCAAEGATK(bi)GATK_;_TGASTNAATNKGQCAAEGATK(bi)GATK_;_TGASTNAATNK(bi)GQCAAEGATKGATK_;_TGASTNAATNKGQCAAEGATK(bi)GATK_;_TGASTNAATNKGQCAAEGATK(bi)GATK_;_TGASTNAATNKGQCAAEGATK(bi)GATK_;_TGASTNAATNKGQCAAEGATK(bi)GATK_;_TGASTNAATNK(bi)GQCAAEGATKGATK_;_TGASTNAATNKGQCAAEGATK(bi)GATK_;_TGASTNAATNKGQC…	0.00102035	2.63435	4.42256	24.5696	24.2459	24.7645	19.5028	19.7265	21.083
PF3D7_1149100	Plasmodium falciparum 3D7	Plasmodium exported protein, unknown function	N/A	Previous IDs: PF11_0508;PF3D7_1149100.1;PF3D7_1149100.2	1	0	Biotin (K)	0	1	3	411	NA	EKNETQEESLNKLSTKNSTNDSIK	_EKNETQEESLNKLSTK(bi)NSTNDSIK_;_EKNETQEESLNKLSTK(bi)NSTNDSIK_;_EKNETQEESLNKLSTK(bi)NSTNDSIK_;_EKNETQEESLNKLSTK(bi)NSTNDSIK_;_EKNETQEESLNKLSTK(bi)NSTNDSIK_;_EKNETQEESLNKLSTK(bi)NSTNDSIK_;_EKNETQEESLNKLSTK(bi)NSTNDSIK_;_EKNETQEESLNKLSTK(bi)NSTNDSIK_;_EKNETQEESLNKLSTK(bi)NSTNDSIK_;_EKNETQEESLNKLSTK(bi)NSTNDSIK_;_EKNETQEESLNKLSTK(bi)NSTNDSIK_	7.53278e-05	3.35323	4.42121	23.62	23.4166	23.3651	19.2174	19.3728	18.548
PF3D7_1371900	Plasmodium falciparum 3D7	Plasmodium exported protein, unknown function	N/A	Previous IDs: MAL13P1.465	1	0	Biotin (K)	0	1	1	58	NA	EFSKSILSR	_EFSK(bi)SILSR_;_EFSK(bi)SILSR_;_EFSK(bi)SILSR_;_EFSK(bi)SILSR_;_EFSK(bi)SILSR_;_EFSK(bi)SILSR_	1.24968e-05	3.78405	4.41584	23.7055	23.6754	23.5876	18.9135	19.4346	19.3729
PF3D7_0202000	Plasmodium falciparum 3D7	knob-associated histidine-rich protein	KAHRP	Previous IDs: PF02_0020;PFB0100c	1	0	Biotin (K)	0	1	1	555;565;575	NA	EATKEASTSK	_EATK(bi)EASTSK_;_EATK(bi)EASTSK_;_EATK(bi)EASTSK_;_EATK(bi)EASTSK_;_EATK(bi)EASTSK_;_EATK(bi)EASTSK_;_EATK(bi)EASTSK_;_EATK(bi)EASTSK_;_EATK(bi)EASTSK_	2.34273e-05	3.6445	4.41574	22.9436	22.8619	23.4713	18.6188	18.6388	18.7721
PF3D7_1016300	Plasmodium falciparum 3D7	GBP130 protein	GBP130	Previous IDs: PF10_0159	1	0	Biotin (K)	0	1	3	254;603;703	NA	KHLEIFYKILTNTDPNDEVERR	_KHLEIFYK(bi)ILTNTDPNDEVERR_;_KHLEIFYK(bi)ILTNTDPNDEVERR_;_KHLEIFYK(bi)ILTNTDPNDEVERR_;_KHLEIFYK(bi)ILTNTDPNDEVERR_;_KHLEIFYK(bi)ILTNTDPNDEVERR_;_KHLEIFYK(bi)ILTNTDPNDEVERR_;_KHLEIFYK(bi)ILTNTDPNDEVERR_	0.00109964	2.61347	4.41148	23.6846	24.498	23.4394	19.1286	20.2905	18.9685
PF3D7_1320000	Plasmodium falciparum 3D7	golgi protein 1	GP1	Previous IDs: PF13_0116	1	0	Biotin (K)	0	1	1	652	NA	NNNLFNKNK	_NNNLFNK(bi)NK_;_NNNLFNK(bi)NK_;_NNNLFNK(bi)NK_;_NNNLFNK(bi)NK_;_NNNLFNK(bi)NK_;_NNNLFNK(bi)NK_;_NNNLFNK(bi)NK_	9.78312e-05	3.28831	4.40964	23.1433	22.8393	23.2472	18.8186	19.0114	18.171
PF3D7_1478600	Plasmodium falciparum 3D7	EMP1-trafficking protein	PTP3	Previous IDs: PF14_0758	1	0	Biotin (K)	0	1	1	257	NA	TKIVNLK	_TK(bi)IVNLK_;_TK(bi)IVNLK_;_TK(bi)IVNLK_;_TK(bi)IVNLK_;_TK(bi)IVNLK_;_TK(bi)IVNLK_;_TK(bi)IVNLK_	0.132037	0.834697	4.39467	25.3111	18.4373	25.3944	19.1251	18.7937	18.04
PF3D7_0202000	Plasmodium falciparum 3D7	knob-associated histidine-rich protein	KAHRP	Previous IDs: PF02_0020;PFB0100c	1	0	Biotin (K);Phospho (STY)	1	1	2	555;575;551;571	548;568	EASTSKEATKEASTSK	_EASTSKEATK(bi)EASTSK_;_EASTSKEATK(bi)EASTSK_;_EASTSK(bi)EATKEASTSK_;_EASTSKEATK(bi)EASTSK_;_EASTSKEATK(bi)EASTSK_;_EASTSK(bi)EATKEASTSK_;_EASTSK(bi)EATKEASTSK_;_EASTSKEATK(bi)EASTSK_;_EASTSKEATK(bi)EASTSK_;_EASTSK(bi)EATKEASTSK_;_EASTSKEATK(bi)EASTSK_;_EASTSKEATK(bi)EASTSK_;_EASTSK(bi)EATKEASTSK_;_EASTSK(bi)EATKEASTSK_;_EASTSKEATK(bi)EASTSK_;_EASTSKEATK(bi)EASTSK_;_EASTSK(bi)EATKEASTSK_;_EASTSKE…	0.00206851	2.41029	4.38775	23.5054	23.6093	23.7261	19.4032	20.1893	18.085
PF3D7_0113000	Plasmodium falciparum 3D7	glutamic acid-rich protein GARP	GARP	Previous IDs: MAL1P3.06;PFA0620c	1	0	Biotin (K)	0	1	1	541	NA	IEEAELQKQK	_IEEAELQK(bi)QK_;_IEEAELQK(bi)QK_;_IEEAELQK(bi)QK_;_IEEAELQK(bi)QK_;_IEEAELQK(bi)QK_;_IEEAELQK(bi)QK_;_IEEAELQK(bi)QK_;_IEEAELQK(bi)QK_;_IEEAELQK(bi)QK_;_IEEAELQK(bi)QK_;_IEEAELQK(bi)QK_;_IEEAELQK(bi)QK_;_IEEAELQK(bi)QK_;_IEEAELQK(bi)QK_;_IEEAELQK(bi)QK_;_IEEAELQK(bi)QK_	0.000472554	2.87055	4.35172	23.872	23.9222	23.8273	19.6388	20.1758	18.7516
Q14847	Homo sapiens (Human)	LIM and SH3 domain protein 1 (LASP-1) (Metastatic lymph node gene 50 protein) (MLN 50)	LASP1 MLN50	NA	0	1	Biotin (K)	0	1	1	23	NA	VNCLDKFWHK	_VNCLDK(bi)FWHK_;_VNCLDK(bi)FWHK_;_VNCLDK(bi)FWHK_;_VNCLDK(bi)FWHK_;_VNCLDK(bi)FWHK_;_VNCLDK(bi)FWHK_;_VNCLDK(bi)FWHK_;_VNCLDK(bi)FWHK_;_VNCLDK(bi)FWHK_;_VNCLDK(bi)FWHK_;_VNCLDK(bi)FWHK_;_VNCLDK(bi)FWHK_;_VNCLDK(bi)FWHK_;_VNCLDK(bi)FWHK_;_VNCLDK(bi)FWHK_;_VNCLDK(bi)FWHK_;_VNCLDK(bi)FWHK_;_VNCLDK(bi)FWHK_;_VNCLDK(bi)FWHK_;_VNCLDK(bi)FWHK_;_VNCLDK(bi)FWHK_;_VNCLDK(bi)FWHK_	0.0233523	1.52881	4.34437	23.62	23.6537	24.0086	17.6197	18.9102	21.7192
PF3D7_0201900	Plasmodium falciparum 3D7	erythrocyte membrane protein 3	EMP3	Previous IDs: PF02_0019;PFB0095c	1	0	Biotin (K)	0	1	1	1369;1564;1681;1785;1863;1941;2058;2136;2227;2266	NA	NTPSEGQQNTGLKNTPSEGQQNTGLK	_NTPSEGQQNTGLK(bi)NTPSEGQQNTGLK_;_NTPSEGQQNTGLK(bi)NTPSEGQQNTGLK_;_NTPSEGQQNTGLK(bi)NTPSEGQQNTGLK_;_NTPSEGQQNTGLK(bi)NTPSEGQQNTGLK_;_NTPSEGQQNTGLK(bi)NTPSEGQQNTGLK_;_NTPSEGQQNTGLK(bi)NTPSEGQQNTGLK_	0.000249938	3.04231	4.31389	23.6418	23.4919	23.7403	18.6351	19.7494	19.548
PF3D7_0721100	Plasmodium falciparum 3D7	conserved protein, unknown function	N/A	Previous IDs: PF07_0087	1	0	Biotin (K)	0	1	2	199	NA	SLKDYNSTQKLDDIYFNITK	_SLK(bi)DYNSTQKLDDIYFNITK_;_SLK(bi)DYNSTQKLDDIYFNITK_;_SLK(bi)DYNSTQKLDDIYFNITK_;_SLK(bi)DYNSTQKLDDIYFNITK_;_SLK(bi)DYNSTQKLDDIYFNITK_;_SLK(bi)DYNSTQKLDDIYFNITK_	0.000271627	3.02187	4.31011	23.872	24.4673	23.5631	19.3389	19.5062	20.1269
PF3D7_0201900	Plasmodium falciparum 3D7	erythrocyte membrane protein 3	EMP3	Previous IDs: PF02_0019;PFB0095c	1	0	Biotin (K)	0	1	1	1382;1434;1577;1733;1811;1954	NA	NTPSEGQQNTGLKNTPNER	_NTPSEGQQNTGLK(bi)NTPNER_;_NTPSEGQQNTGLK(bi)NTPNER_;_NTPSEGQQNTGLK(bi)NTPNER_;_NTPSEGQQNTGLK(bi)NTPNER_;_NTPSEGQQNTGLK(bi)NTPNER_;_NTPSEGQQNTGLK(bi)NTPNER_;_NTPSEGQQNTGLK(bi)NTPNER_;_NTPSEGQQNTGLK(bi)NTPNER_;_NTPSEGQQNTGLK(bi)NTPNER_;_NTPSEGQQNTGLK(bi)NTPNER_;_NTPSEGQQNTGLK(bi)NTPNER_;_NTPSEGQQNTGLK(bi)NTPNER_	0.000266147	3.02435	4.29419	22.6471	22.76	22.9202	17.8254	18.6224	18.9969
PF3D7_0202000	Plasmodium falciparum 3D7	knob-associated histidine-rich protein	KAHRP	Previous IDs: PF02_0020;PFB0100c	1	0	Biotin (K)	0	1	1	545	NA	GATKEASTSK	_GATK(bi)EASTSK_;_GATK(bi)EASTSK_;_GATK(bi)EASTSK_;_GATK(bi)EASTSK_;_GATK(bi)EASTSK_;_GATK(bi)EASTSK_;_GATK(bi)EASTSK_;_GATK(bi)EASTSK_;_GATK(bi)EASTSK_;_GATK(bi)EASTSK_;_GATK(bi)EASTSK_;_GATK(bi)EASTSK_	0.000353472	2.9569	4.27992	23.2273	22.6001	23.437	18.8083	19.3014	18.3151
PF3D7_0201900	Plasmodium falciparum 3D7	erythrocyte membrane protein 3	EMP3	Previous IDs: PF02_0019;PFB0095c	1	0	Biotin (K)	0	1	1	1772;1850;1928;2006;2045;2123;2188;2318;2344	NA	NTPNEGQQNTGLKNTPSEGQQNTGLK	_NTPNEGQQNTGLK(bi)NTPSEGQQNTGLK_;_NTPNEGQQNTGLK(bi)NTPSEGQQNTGLK_;_NTPNEGQQNTGLK(bi)NTPSEGQQNTGLK_;_NTPNEGQQNTGLK(bi)NTPSEGQQNTGLK_;_NTPNEGQQNTGLK(bi)NTPSEGQQNTGLK_;_NTPNEGQQNTGLK(bi)NTPSEGQQNTGLK_;_NTPNEGQQNTGLK(bi)NTPSEGQQNTGLK_	0.00040256	2.91966	4.27659	23.2204	22.9724	23.2765	18.1455	19.4242	19.0698
PF3D7_0936800	Plasmodium falciparum 3D7	Plasmodium exported protein (PHISTc), unknown function	N/A	Previous IDs: PFI1780w	1	0	Biotin (K)	0	1	2	347;352;350	NA	VQPPKVQKPK	_VQPPK(bi)VQKPK_;_VQPPKVQKPK(bi)_;_VQPPKVQK(bi)PK_;_VQPPK(bi)VQKPK_;_VQPPK(bi)VQKPK_;_VQPPK(bi)VQKPK_;_VQPPK(bi)VQKPK_;_VQPPK(bi)VQKPK_;_VQPPK(bi)VQKPK_;_VQPPK(bi)VQKPK_;_VQPPK(bi)VQKPK_;_VQPPK(bi)VQKPK_;_VQPPK(bi)VQKPK_;_VQPPK(bi)VQKPK_;_VQPPK(bi)VQKPK_;_VQPPK(bi)VQKPK_;_VQPPK(bi)VQKPK_;_VQPPK(bi)VQKPK_;_VQPPK(bi)VQKPK_;_VQPPK(bi)VQKPK_;_VQPPK(bi)VQKPK_	0.0775388	1.05277	4.27041	25.1939	24.9447	25.3944	17.308	22.9161	22.4977
PF3D7_0202000	Plasmodium falciparum 3D7	knob-associated histidine-rich protein	KAHRP	Previous IDs: PF02_0020;PFB0100c	1	0	Biotin (K)	0	1	2	595	NA	EASTTEGATKGASTTAGSTTGATTGANAVQSKDETADK	_EASTTEGATK(bi)GASTTAGSTTGATTGANAVQSKDETADK_;_EASTTEGATK(bi)GASTTAGSTTGATTGANAVQSKDETADK_;_EASTTEGATK(bi)GASTTAGSTTGATTGANAVQSKDETADK_;_EASTTEGATK(bi)GASTTAGSTTGATTGANAVQSKDETADK_;_EASTTEGATK(bi)GASTTAGSTTGATTGANAVQSKDETADK_;_EASTTEGATK(bi)GASTTAGSTTGATTGANAVQSKDETADK_;_EASTTEGATK(bi)GASTTAGSTTGATTGANAVQSKDETADK_;_EASTTEGATK(bi)GASTTAGSTTGATTGANAVQSKDETADK_;_EASTTEGATK(bi)GASTTAGSTTGATTGANAVQSKDE…	0.000138057	3.20163	4.2651	22.0877	22.1482	22.9203	17.861	18.2414	18.2586
PF3D7_0302500	Plasmodium falciparum 3D7	cytoadherence linked asexual protein 3.1	CLAG3.1	Previous IDs: MAL3P1.5;PFC0120w	1	0	Biotin (K)	0	1	2	1323	NA	NKMSTYVDDFAFFDDCGKNEQFLNER	_NK(bi)MSTYVDDFAFFDDCGKNEQFLNER_;_NK(bi)MSTYVDDFAFFDDCGKNEQFLNER_;_NK(bi)MSTYVDDFAFFDDCGKNEQFLNER_;_NK(bi)MSTYVDDFAFFDDCGKNEQFLNER_;_NK(bi)MSTYVDDFAFFDDCGKNEQFLNER_;_NK(bi)MSTYVDDFAFFDDCGKNEQFLNER_;_NK(bi)MSTYVDDFAFFDDCGKNEQFLNER_;_NK(bi)M(ox)STYVDDFAFFDDCGKNEQFLNER_	0.00319984	2.26365	4.23276	22.5683	23.5751	21.3444	18.3565	17.9171	18.5159
P16157	Homo sapiens (Human)	Ankyrin-1 (ANK-1) (Ankyrin-R) (Erythrocyte ankyrin)	ANK1 ANK	NA	0	1	Biotin (K)	0	1	2	955;958	NA	LVKPQKLSTPPPLAEEEGLASR	_LVK(bi)PQKLSTPPPLAEEEGLASR_;_LVK(bi)PQKLSTPPPLAEEEGLASR_;_LVK(bi)PQKLSTPPPLAEEEGLASR_;_LVK(bi)PQKLSTPPPLAEEEGLASR_;_LVK(bi)PQKLSTPPPLAEEEGLASR_;_LVK(bi)PQKLSTPPPLAEEEGLASR_;_LVK(bi)PQKLSTPPPLAEEEGLASR_;_LVKPQK(bi)LSTPPPLAEEEGLASR_	0.000167139	3.15057	4.2216	23.4569	22.9651	22.9826	18.5335	18.785	19.4213
PF3D7_1201000	Plasmodium falciparum 3D7	Plasmodium exported protein (PHISTb), unknown function	N/A	Previous IDs: 2277.t00010;MAL12P1.10;PFL0050c	1	0	Biotin (K)	0	1	2	393	NA	KVSNIKNNLR	_KVSNIK(bi)NNLR_;_KVSNIK(bi)NNLR_;_KVSNIK(bi)NNLR_;_KVSNIK(bi)NNLR_;_KVSNIK(bi)NNLR_;_KVSNIK(bi)NNLR_;_KVSNIK(bi)NNLR_;_KVSNIK(bi)NNLR_;_KVSNIK(bi)NNLR_	0.000419682	2.90734	4.20265	23.2125	23.4796	23.1417	18.9412	19.7831	18.5016
PF3D7_1016300	Plasmodium falciparum 3D7	GBP130 protein	GBP130	Previous IDs: PF10_0159	1	0	Biotin (K)	0	1	2	149	NA	KQINIGDTENQKEGK	_K(bi)QINIGDTENQKEGK_;_K(bi)QINIGDTENQKEGK_;_K(bi)QINIGDTENQKEGK_;_K(bi)QINIGDTENQKEGK_;_K(bi)QINIGDTENQKEGK_;_K(bi)QINIGDTENQKEGK_;_K(bi)QINIGDTENQKEGK_;_K(bi)QINIGDTENQKEGK_;_K(bi)QINIGDTENQKEGK_;_K(bi)QINIGDTENQKEGK_;_K(bi)QINIGDTENQKEGK_;_K(bi)QINIGDTENQKEGK_;_K(bi)QINIGDTENQKEGK_;_K(bi)QINIGDTENQKEGK_;_K(bi)QINIGDTENQKEGK_;_K(bi)QINIGDTENQKEGK_;_K(bi)QINIGDTENQKEGK_;_K(bi)QINIGDTENQKEGK_;_K(…	7.55992e-06	3.89467	4.20046	30.3597	30.2418	30.3492	25.8819	26.3525	26.1149
PF3D7_0202000	Plasmodium falciparum 3D7	knob-associated histidine-rich protein	KAHRP	Previous IDs: PF02_0020;PFB0100c	1	0	Biotin (K)	0	1	2	520;531	NA	TDKTGASTNAATNKGQCAAEGATK	_TDK(bi)TGASTNAATNKGQCAAEGATK_;_TDK(bi)TGASTNAATNKGQCAAEGATK_;_TDKTGASTNAATNK(bi)GQCAAEGATK_;_TDK(bi)TGASTNAATNKGQCAAEGATK_;_TDK(bi)TGASTNAATNKGQCAAEGATK_;_TDKTGASTNAATNK(bi)GQCAAEGATK_;_TDK(bi)TGASTNAATNKGQCAAEGATK_;_TDKTGASTNAATNK(bi)GQCAAEGATK_;_TDK(bi)TGASTNAATNKGQCAAEGATK_;_TDKTGASTNAATNK(bi)GQCAAEGATK_;_TDKTGASTNAATNK(bi)GQCAAEGATK_;_TDK(bi)TGASTNAATNKGQCAAEGATK_;_TDKTGASTNAATNK(bi)GQCAAEGA…	7.64485e-05	3.35151	4.19213	26.4477	26.3955	26.5981	22.6117	22.4444	21.8089
PF3D7_0202000	Plasmodium falciparum 3D7	knob-associated histidine-rich protein	KAHRP	Previous IDs: PF02_0020;PFB0100c	1	0	Biotin (K)	0	1	2	517;520	NA	TQGGKTDKTGASTNAATNK	_TQGGK(bi)TDKTGASTNAATNK_;_TQGGKTDK(bi)TGASTNAATNK_;_TQGGK(bi)TDKTGASTNAATNK_;_TQGGKTDK(bi)TGASTNAATNK_;_TQGGK(bi)TDKTGASTNAATNK_;_TQGGKTDK(bi)TGASTNAATNK_;_TQGGKTDK(bi)TGASTNAATNK_;_TQGGK(bi)TDKTGASTNAATNK_;_TQGGKTDK(bi)TGASTNAATNK_;_TQGGK(bi)TDKTGASTNAATNK_;_TQGGKTDK(bi)TGASTNAATNK_;_TQGGKTDK(bi)TGASTNAATNK_;_TQGGKTDK(bi)TGASTNAATNK_;_TQGGKTDK(bi)TGASTNAATNK_;_TQGGKTDK(bi)TGASTNAATNK_;_TQGGKTDK…	0.000519962	2.84848	4.1775	23.844	23.3097	23.6986	19.372	20.1244	18.8233
PF3D7_0202000	Plasmodium falciparum 3D7	knob-associated histidine-rich protein	KAHRP	Previous IDs: PF02_0020;PFB0100c	1	0	Biotin (K)	0	1	1	531	NA	TGASTNAATNKGQCAAEGATK	_TGASTNAATNK(bi)GQCAAEGATK_;_TGASTNAATNK(bi)GQCAAEGATK_;_TGASTNAATNK(bi)GQCAAEGATK_;_TGASTNAATNK(bi)GQCAAEGATK_;_TGASTNAATNK(bi)GQCAAEGATK_;_TGASTNAATNK(bi)GQCAAEGATK_;_TGASTNAATNK(bi)GQCAAEGATK_;_TGASTNAATNK(bi)GQCAAEGATK_;_TGASTNAATNK(bi)GQCAAEGATK_;_TGASTNAATNK(bi)GQCAAEGATK_;_TGASTNAATNK(bi)GQCAAEGATK_;_TGASTNAATNK(bi)GQCAAEGATK_;_TGASTNAATNK(bi)GQCAAEGATK_;_TGASTNAATNK(bi)GQCAAEGATK_;_TGASTN…	6.98833e-05	3.37618	4.17191	27.1939	27.1504	27.384	23.4901	23.0428	22.6797
PF3D7_1410400	Plasmodium falciparum 3D7	rhoptry-associated protein 1	RAP1	Previous IDs: PF14_0102	1	0	Biotin (K)	0	1	1	130	NA	ASPSVVKTSTPSGTQTSGLK	_ASPSVVK(bi)TSTPSGTQTSGLK_;_ASPSVVK(bi)TSTPSGTQTSGLK_;_ASPSVVK(bi)TSTPSGTQTSGLK_;_ASPSVVK(bi)TSTPSGTQTSGLK_;_ASPSVVK(bi)TSTPSGTQTSGLK_;_ASPSVVK(bi)TSTPSGTQTSGLK_;_ASPSVVK(bi)TSTPSGTQTSGLK_;_ASPSVVK(bi)TSTPSGTQTSGLK_;_ASPSVVK(bi)TSTPSGTQTSGLK_;_ASPSVVK(bi)TSTPSGTQTSGLK_;_ASPSVVK(bi)TSTPSGTQTSGLK_;_ASPSVVK(bi)TSTPSGTQTSGLK_;_ASPSVVK(bi)TSTPSGTQTSGLK_	0.0151849	1.68866	4.17012	22.4466	21.8884	23.1803	16.7919	20.0756	18.1374
PF3D7_1016300	Plasmodium falciparum 3D7	GBP130 protein	GBP130	Previous IDs: PF10_0159	1	0	Biotin (K)	0	1	1	216	NA	SNNEVKIR	_SNNEVK(bi)IR_;_SNNEVK(bi)IR_;_SNNEVK(bi)IR_;_SNNEVK(bi)IR_;_SNNEVK(bi)IR_;_SNNEVK(bi)IR_;_SNNEVK(bi)IR_	6.39702e-05	3.39529	4.16871	22.8896	22.6918	23.3101	18.4893	18.9954	18.9007
PF3D7_0202000	Plasmodium falciparum 3D7	knob-associated histidine-rich protein	KAHRP	Previous IDs: PF02_0020;PFB0100c	1	0	Biotin (K)	0	1	3	512;517;520	NA	DKTQGGKTDKTGASTNAATNK	_DK(bi)TQGGKTDKTGASTNAATNK_;_DK(bi)TQGGKTDKTGASTNAATNK_;_DKTQGGK(bi)TDKTGASTNAATNK_;_DKTQGGK(bi)TDKTGASTNAATNK_;_DKTQGGK(bi)TDKTGASTNAATNK_;_DKTQGGKTDK(bi)TGASTNAATNK_;_DKTQGGKTDK(bi)TGASTNAATNK_;_DK(bi)TQGGKTDKTGASTNAATNK_;_DK(bi)TQGGKTDKTGASTNAATNK_;_DKTQGGK(bi)TDKTGASTNAATNK_;_DKTQGGK(bi)TDKTGASTNAATNK_;_DKTQGGK(bi)TDKTGASTNAATNK_;_DKTQGGKTDK(bi)TGASTNAATNK_;_DK(bi)TQGGKTDKTGASTNAATNK_;_DKTQGG…	4.7152e-05	3.4775	4.16397	26.1412	25.7514	26.3495	21.8813	22.1669	21.7018
PF3D7_0500800	Plasmodium falciparum 3D7	mature parasite-infected erythrocyte surface antigen	MESA	Previous IDs: MAL5P1.9;PFE0040c	1	0	Biotin (K)	0	1	2	891	NA	KDNVIGKEIMK	_KDNVIGK(bi)EIMK_;_KDNVIGK(bi)EIMK_;_KDNVIGK(bi)EIMK_;_KDNVIGK(bi)EIMK_;_KDNVIGK(bi)EIMK_;_KDNVIGK(bi)EIMK_;_KDNVIGK(bi)EIMK_;_KDNVIGK(bi)EIMK_;_KDNVIGK(bi)EIMK_;_KDNVIGK(bi)EIMK_;_KDNVIGK(bi)EIMK_;_KDNVIGK(bi)EIMK_;_KDNVIGK(bi)EIMK_;_KDNVIGK(bi)EIMK_	0.00126119	2.57287	4.14189	23.6527	23.6093	23.4878	18.9602	20.4584	18.9054
P37802	Homo sapiens (Human)	Transgelin-2 (Epididymis tissue protein Li 7e) (SM22-alpha homolog)	TAGLN2 KIAA0120 CDABP0035	NA	0	1	Biotin (K);Oxidation (M)	0	1	1	171	NA	NFSDNQLQEGKNVIGLQMGTNR	_NFSDNQLQEGK(bi)NVIGLQM(ox)GTNR_;_NFSDNQLQEGK(bi)NVIGLQM(ox)GTNR_;_NFSDNQLQEGK(bi)NVIGLQM(ox)GTNR_;_NFSDNQLQEGK(bi)NVIGLQM(ox)GTNR_;_NFSDNQLQEGK(bi)NVIGLQM(ox)GTNR_;_NFSDNQLQEGK(bi)NVIGLQM(ox)GTNR_;_NFSDNQLQEGK(bi)NVIGLQM(ox)GTNR_;_NFSDNQLQEGK(bi)NVIGLQM(ox)GTNR_;_NFSDNQLQEGK(bi)NVIGLQMGTNR_;_NFSDNQLQEGK(bi)NVIGLQMGTNR_;_NFSDNQLQEGK(bi)NVIGLQMGTNR_;_NFSDNQLQEGK(bi)NVIGLQMGTNR_;_NFSDNQLQEGK(bi)NVI…	0.000805201	2.7122	4.13896	22.9143	23.1268	23.6195	19.5523	19.4131	18.2784
P37840	Homo sapiens (Human)	Alpha-synuclein (Non-A beta component of AD amyloid) (Non-A4 component of amyloid precursor) (NACP)	SNCA NACP PARK1	NA	0	1	2 Biotin (K)	0	2	3	32;45;43;34	NA	QGVAEAAGKTKEGVLYVGSKTK	_QGVAEAAGK(bi)TKEGVLYVGSKTK(bi)_;_QGVAEAAGK(bi)TKEGVLYVGSKTK(bi)_;_QGVAEAAGK(bi)TKEGVLYVGSK(bi)TK_;_QGVAEAAGKTK(bi)EGVLYVGSKTK(bi)_;_QGVAEAAGK(bi)TKEGVLYVGSKTK(bi)_;_QGVAEAAGKTK(bi)EGVLYVGSKTK(bi)_;_QGVAEAAGK(bi)TKEGVLYVGSKTK(bi)_;_QGVAEAAGK(bi)TKEGVLYVGSKTK(bi)_;_QGVAEAAGK(bi)TKEGVLYVGSK(bi)TK_;_QGVAEAAGKTK(bi)EGVLYVGSK(bi)TK_;_QGVAEAAGK(bi)TKEGVLYVGSKTK(bi)_;_QGVAEAAGK(bi)TK(bi)EGVLYVGSKTK(bi)_	0.000754377	2.73344	4.13267	23.6951	23.6316	23.2722	19.2309	20.2084	18.7617
PF3D7_0201900	Plasmodium falciparum 3D7	erythrocyte membrane protein 3	EMP3	Previous IDs: PF02_0019;PFB0095c	1	0	Biotin (K)	0	1	2	284	NA	RPMMVKMQR	_RPM(ox)MVK(bi)MQR_;_RPMMVK(bi)M(ox)QR_;_RPM(ox)MVK(bi)MQR_;_RPM(ox)MVK(bi)MQR_;_RPMM(ox)VK(bi)MQR_;_RPM(ox)MVK(bi)MQR_;_RPM(ox)MVK(bi)MQR_;_RPM(ox)MVK(bi)MQR_;_RPMMVK(bi)M(ox)QR_;_RPMMVK(bi)M(ox)QR_;_RPMMVK(bi)M(ox)QR_;_RPMMVK(bi)M(ox)QR_;_RPM(ox)MVK(bi)MQR_;_RPMMVK(bi)M(ox)QR_;_RPMMVK(bi)MQR_;_RPMMVK(bi)MQR_;_RPMMVK(bi)MQR_;_RPMMVK(bi)MQR_;_RPMMVK(bi)MQR_;_RPMMVK(bi)MQR_;_RPMM(ox)VK(bi)M(ox)QR_…	0.000185391	3.12315	4.12085	22.9375	22.9775	22.8692	18.3332	19.3863	18.7022
PF3D7_0202000	Plasmodium falciparum 3D7	knob-associated histidine-rich protein	KAHRP	Previous IDs: PF02_0020;PFB0100c	1	0	Biotin (K)	0	1	2	581;575;585	NA	EATKEASTSKGATK	_EATKEASTSK(bi)GATK_;_EATKEASTSK(bi)GATK_;_EATKEASTSK(bi)GATK_;_EATKEASTSK(bi)GATK_;_EATKEASTSK(bi)GATK_;_EATKEASTSK(bi)GATK_;_EATKEASTSK(bi)GATK_;_EATKEASTSK(bi)GATK_;_EATKEASTSK(bi)GATK_;_EATKEASTSK(bi)GATK_;_EATKEASTSK(bi)GATK_;_EATKEASTSK(bi)GATK_;_EATKEAST(ph)SK(bi)GATK_;_EATKEAS(ph)TSK(bi)GATK_;_EATKEAS(ph)TSK(bi)GATK_;_EATKEAS(ph)TSK(bi)GATK_;_EATKEAS(ph)TSK(bi)GATK_;_EATKEAS(ph)TSK(bi)GAT…	0.00118747	2.59142	4.12078	22.8907	22.0705	23.2334	18.4585	18.0726	19.3012
PF3D7_0730900	Plasmodium falciparum 3D7	EMP1-trafficking protein	PTP4	Previous IDs: MAL7P1.171	1	0	Biotin (K)	0	1	2	1883;1971;2015;2059	NA	FVDNREKTLGK	_FVDNREK(bi)TLGK_;_FVDNREK(bi)TLGK_;_FVDNREK(bi)TLGK_;_FVDNREK(bi)TLGK_;_FVDNREK(bi)TLGK_;_FVDNREK(bi)TLGK_;_FVDNREK(bi)TLGK_;_FVDNREK(bi)TLGK_;_FVDNREK(bi)TLGK_;_FVDNREK(bi)TLGK_;_FVDNREK(bi)TLGK_;_FVDNREK(bi)TLGK_	0.000347478	2.96276	4.10551	22.8247	22.6731	23.2065	19.1014	19.1425	18.1439
PF3D7_0113000	Plasmodium falciparum 3D7	glutamic acid-rich protein GARP	GARP	Previous IDs: MAL1P3.06;PFA0620c	1	0	Biotin (K)	0	1	1	499;497	NA	LIDEPEQLTLMDKSK	_LIDEPEQLTLMDKSK(bi)_;_LIDEPEQLTLMDK(bi)SK_;_LIDEPEQLTLMDK(bi)SK_;_LIDEPEQLTLMDK(bi)SK_;_LIDEPEQLTLMDKSK(bi)_;_LIDEPEQLTLMDK(bi)SK_;_LIDEPEQLTLMDK(bi)SK_;_LIDEPEQLTLMDK(bi)SK_;_LIDEPEQLTLMDK(bi)SK_;_LIDEPEQLTLMDK(bi)SK_;_LIDEPEQLTLMDKSK(bi)_;_LIDEPEQLTLMDKSK(bi)_;_LIDEPEQLTLMDKSK(bi)_;_LIDEPEQLTLMDKSK(bi)_;_LIDEPEQLTLM(ox)DK(bi)SK_;_LIDEPEQLTLM(ox)DK(bi)SK_;_LIDEPEQLTLM(ox)DK(bi)SK_;_LIDEPEQLTLM(…	0.000428861	2.90269	4.08851	23.5523	23.2675	23.232	18.9992	19.9882	18.799
O43491	Homo sapiens (Human)	Band 4.1-like protein 2 (Erythrocyte membrane protein band 4.1-like 2) (Generally expressed protein 4.1) (4.1G)	EPB41L2	NA	0	1	2 Biotin (K)	0	2	3	956;946	NA	TVKGGISETRIEKR	_TVKGGISETRIEK(bi)R_;_TVKGGISETRIEK(bi)R_;_TVKGGISETRIEK(bi)R_;_TVKGGISETRIEK(bi)R_;_TVKGGISETRIEK(bi)R_;_TVKGGISETRIEK(bi)R_;_TVKGGISETRIEK(bi)R_;_TVKGGISETRIEK(bi)R_;_TVKGGISETRIEK(bi)R_;_TVKGGISETRIEK(bi)R_;_TVKGGISETRIEK(bi)R_;_TVKGGISETRIEK(bi)R_;_TVK(bi)GGISETRIEK(bi)R_;_TVK(bi)GGISETRIEK(bi)R_;_TVK(bi)GGISETRIEK(bi)R_;_TVK(bi)GGISETRIEK(bi)R_;_TVK(bi)GGISETRIEK(bi)R_;_TVK(bi)GGISETRIEK(bi)…	0.000183857	3.12364	4.08791	22.7396	22.6241	23.0638	18.2919	19.2401	18.6318
P11171	Homo sapiens (Human)	Protein 4.1 (P4.1) (4.1R) (Band 4.1) (EPB4.1) (Erythrocyte membrane protein band 4.1)	EPB41 E41P	NA	0	1	2 Biotin (K)	0	2	3	818;808	NA	TVKGGISETRIEKR	_TVKGGISETRIEK(bi)R_;_TVKGGISETRIEK(bi)R_;_TVKGGISETRIEK(bi)R_;_TVKGGISETRIEK(bi)R_;_TVKGGISETRIEK(bi)R_;_TVKGGISETRIEK(bi)R_;_TVKGGISETRIEK(bi)R_;_TVKGGISETRIEK(bi)R_;_TVKGGISETRIEK(bi)R_;_TVKGGISETRIEK(bi)R_;_TVKGGISETRIEK(bi)R_;_TVKGGISETRIEK(bi)R_;_TVK(bi)GGISETRIEK(bi)R_;_TVK(bi)GGISETRIEK(bi)R_;_TVK(bi)GGISETRIEK(bi)R_;_TVK(bi)GGISETRIEK(bi)R_;_TVK(bi)GGISETRIEK(bi)R_;_TVK(bi)GGISETRIEK(bi)…	0.000183857	3.12364	4.08791	22.7396	22.6241	23.0638	18.2919	19.2401	18.6318
Q9Y2J2	Homo sapiens (Human)	Band 4.1-like protein 3 (4.1B) (Differentially expressed in adenocarcinoma of the lung protein 1) (DAL-1) (Erythrocyte membrane protein band 4.1-like 3) [Cleaved into: Band 4.1-like protein 3, N-terminally processed]	EPB41L3 DAL1 KIAA0987	NA	0	1	2 Biotin (K)	0	2	3	1037;1027	NA	TVKGGISETRIEKR	_TVKGGISETRIEK(bi)R_;_TVKGGISETRIEK(bi)R_;_TVKGGISETRIEK(bi)R_;_TVKGGISETRIEK(bi)R_;_TVKGGISETRIEK(bi)R_;_TVKGGISETRIEK(bi)R_;_TVKGGISETRIEK(bi)R_;_TVKGGISETRIEK(bi)R_;_TVKGGISETRIEK(bi)R_;_TVKGGISETRIEK(bi)R_;_TVKGGISETRIEK(bi)R_;_TVKGGISETRIEK(bi)R_;_TVK(bi)GGISETRIEK(bi)R_;_TVK(bi)GGISETRIEK(bi)R_;_TVK(bi)GGISETRIEK(bi)R_;_TVK(bi)GGISETRIEK(bi)R_;_TVK(bi)GGISETRIEK(bi)R_;_TVK(bi)GGISETRIEK(bi)…	0.000183857	3.12364	4.08791	22.7396	22.6241	23.0638	18.2919	19.2401	18.6318
PF3D7_0936800	Plasmodium falciparum 3D7	Plasmodium exported protein (PHISTc), unknown function	N/A	Previous IDs: PFI1780w	1	0	Biotin (K)	0	1	2	312;342	NA	VQPPKVQQQKVQPPK	_VQPPKVQQQK(bi)VQPPK_;_VQPPKVQQQK(bi)VQPPK_;_VQPPKVQQQK(bi)VQPPK_;_VQPPKVQQQK(bi)VQPPK_;_VQPPKVQQQK(bi)VQPPK_;_VQPPKVQQQK(bi)VQPPK_;_VQPPKVQQQK(bi)VQPPK_	9.66905e-06	3.84452	4.07444	23.056	22.7958	23.1531	18.776	19.1133	18.8922
PF3D7_0202000	Plasmodium falciparum 3D7	knob-associated histidine-rich protein	KAHRP	Previous IDs: PF02_0020;PFB0100c	1	0	Biotin (K)	0	1	2	555;561	NA	EATKEASTSKEATK	_EATK(bi)EASTSKEATK_;_EATK(bi)EASTSKEATK_;_EATK(bi)EASTSKEATK_;_EATK(bi)EASTSKEATK_;_EATKEASTSK(bi)EATK_;_EATK(bi)EASTSKEATK_;_EATK(bi)EASTSKEATK_;_EATKEASTSK(bi)EATK_;_EATKEASTSK(bi)EATK_;_EATKEASTSK(bi)EATK_;_EATKEASTSK(bi)EATK_;_EATKEASTSK(bi)EATK_;_EATKEASTSK(bi)EATK_	6.96277e-05	3.37618	4.0736	22.4853	22.0894	22.6124	18.574	17.9736	18.4187
PF3D7_0401800	Plasmodium falciparum 3D7	Plasmodium exported protein (PHISTb), unknown function	PfD80	Previous IDs: MAL4P1.16;PFD0080c	1	0	Biotin (K)	0	1	1	374	NA	TKTFSK	_TK(bi)TFSK_;_TK(bi)TFSK_;_TK(bi)TFSK_;_TK(bi)TFSK_;_TK(bi)TFSK_;_TK(bi)TFSK_;_TK(bi)TFSK_;_TK(bi)TFSK_;_TK(bi)TFSK_;_TK(bi)TFSK_;_TK(bi)TFSK_	7.18962e-05	3.36772	4.06947	24.631	24.2092	24.946	20.3032	20.6273	20.6472
PF3D7_0202000	Plasmodium falciparum 3D7	knob-associated histidine-rich protein	KAHRP	Previous IDs: PF02_0020;PFB0100c	1	0	2 Biotin (K)	0	2	3	541;545;531	NA	TGASTNAATNKGQCAAEGATKGATKEASTSK	_TGASTNAATNKGQCAAEGATK(bi)GATKEASTSK_;_TGASTNAATNKGQCAAEGATK(bi)GATKEASTSK_;_TGASTNAATNKGQCAAEGATKGATK(bi)EASTSK_;_TGASTNAATNKGQCAAEGATK(bi)GATKEASTSK_;_TGASTNAATNKGQCAAEGATK(bi)GATKEASTSK_;_TGASTNAATNKGQCAAEGATKGATK(bi)EASTSK_;_TGASTNAATNKGQCAAEGATK(bi)GATKEASTSK_;_TGASTNAATNKGQCAAEGATKGATK(bi)EASTSK_;_TGASTNAATNKGQCAAEGATK(bi)GATKEASTSK_;_TGASTNAATNKGQCAAEGATK(bi)GATKEASTSK_;_TGASTNAATNKGQCAAEG…	0.000435342	2.899	4.06448	22.7801	22.8165	23.0656	18.1687	18.8511	19.4489
PF3D7_0113000	Plasmodium falciparum 3D7	glutamic acid-rich protein GARP	GARP	Previous IDs: MAL1P3.06;PFA0620c	1	0	Biotin (K)	0	1	2	530;533	NA	KMAKIEEAELQK	_K(bi)M(ox)AKIEEAELQK_;_KM(ox)AK(bi)IEEAELQK_;_KM(ox)AK(bi)IEEAELQK_;_K(bi)M(ox)AKIEEAELQK_;_K(bi)M(ox)AKIEEAELQK_;_K(bi)M(ox)AKIEEAELQK_;_K(bi)MAKIEEAELQK_;_KMAK(bi)IEEAELQK_;_KMAK(bi)IEEAELQK_;_KMAK(bi)IEEAELQK_;_KMAK(bi)IEEAELQK_;_KMAK(bi)IEEAELQK_;_KMAK(bi)IEEAELQK_;_KMAK(bi)IEEAELQK_;_KMAK(bi)IEEAELQK_;_KMAK(bi)IEEAELQK_;_KMAK(bi)IEEAELQK_;_KMAK(bi)IEEAELQK_;_KMAK(bi)IEEAELQK_;_KMAK(bi)IEEAE…	5.09737e-06	3.89646	4.05479	24.5753	24.3575	24.3575	20.2027	20.3753	20.5479
PF3D7_1016300	Plasmodium falciparum 3D7	GBP130 protein	GBP130	Previous IDs: PF10_0159	1	0	Biotin (K)	0	1	1	247;297;596;696;746	NA	KHLEIFYK	_K(bi)HLEIFYK_;_K(bi)HLEIFYK_;_K(bi)HLEIFYK_;_K(bi)HLEIFYK_;_K(bi)HLEIFYK_;_K(bi)HLEIFYK_;_K(bi)HLEIFYK_;_K(bi)HLEIFYK_;_K(bi)HLEIFYK_;_K(bi)HLEIFYK_;_K(bi)HLEIFYK_;_K(bi)HLEIFYK_;_K(bi)HLEIFYK_;_K(bi)HLEIFYK_;_K(bi)HLEIFYK_;_K(bi)HLEIFYK_;_K(bi)HLEIFYK_;_K(bi)HLEIFYK_;_K(bi)HLEIFYK_;_K(bi)HLEIFYK_;_K(bi)HLEIFYK_;_K(bi)HLEIFYK_;_K(bi)HLEIFYK_;_K(bi)HLEIFYK_;_K(bi)HLEIFYK_;_K(bi)HLEIFYK_;_K(bi)HLE…	7.69812e-06	3.89467	4.0524	30.2304	29.897	30.1418	25.851	26.1423	26.1187
PF3D7_0532300	Plasmodium falciparum 3D7	Plasmodium exported protein (PHISTb), unknown function	N/A	Previous IDs: MAL5P1.314;PFE1600w	1	0	Biotin (K)	0	1	2	438	NA	EMESKVEKLAENQVEK	_EMESK(bi)VEKLAENQVEK_;_EMESK(bi)VEKLAENQVEK_;_EMESK(bi)VEKLAENQVEK_;_EMESK(bi)VEKLAENQVEK_;_EMESK(bi)VEKLAENQVEK_;_EMESK(bi)VEKLAENQVEK_	0.000553333	2.82736	4.03426	22.8706	22.7428	22.8879	19.5889	18.3012	18.5084
PF3D7_1365000	Plasmodium falciparum 3D7	conserved Plasmodium protein, unknown function	N/A	Previous IDs: PF13_0342	1	0	Biotin (K)	0	1	1	120	NA	IQYLGYKSNELTK	_IQYLGYK(bi)SNELTK_;_IQYLGYK(bi)SNELTK_;_IQYLGYK(bi)SNELTK_;_IQYLGYK(bi)SNELTK_	0.00304276	2.28052	4.03286	22.647	22.6102	22.1536	18.606	17.3089	19.3974
PF3D7_1016300	Plasmodium falciparum 3D7	GBP130 protein	GBP130	Previous IDs: PF10_0159	1	0	Biotin (K)	0	1	1	354;404;453;503;803	NA	HLEVFHKILTNTDPNDEVER	_HLEVFHK(bi)ILTNTDPNDEVER_;_HLEVFHK(bi)ILTNTDPNDEVER_;_HLEVFHK(bi)ILTNTDPNDEVER_;_HLEVFHK(bi)ILTNTDPNDEVER_;_HLEVFHK(bi)ILTNTDPNDEVER_;_HLEVFHK(bi)ILTNTDPNDEVER_;_HLEVFHK(bi)ILTNTDPNDEVER_;_HLEVFHK(bi)ILTNTDPNDEVER_;_HLEVFHK(bi)ILTNTDPNDEVER_;_HLEVFHK(bi)ILTNTDPNDEVER_;_HLEVFHK(bi)ILTNTDPNDEVER_;_HLEVFHK(bi)ILTNTDPNDEVER_;_HLEVFHK(bi)ILTNTDPNDEVER_;_HLEVFHK(bi)ILTNTDPNDEVER_;_HLEVFHK(bi)ILTNTDPND…	0.000341184	2.96867	4.0129	24.2086	23.6537	23.1589	19.7715	19.9034	19.3077
PF3D7_0202000	Plasmodium falciparum 3D7	knob-associated histidine-rich protein	KAHRP	Previous IDs: PF02_0020;PFB0100c	1	0	Biotin (K)	0	1	1	541;545	NA	GQCAAEGATKGATK	_GQCAAEGATK(bi)GATK_;_GQCAAEGATK(bi)GATK_;_GQCAAEGATK(bi)GATK_;_GQCAAEGATK(bi)GATK_;_GQCAAEGATK(bi)GATK_;_GQCAAEGATKGATK(bi)_;_GQCAAEGATK(bi)GATK_;_GQCAAEGATK(bi)GATK_;_GQCAAEGATK(bi)GATK_;_GQCAAEGATK(bi)GATK_;_GQCAAEGATK(bi)GATK_;_GQCAAEGATK(bi)GATK_;_GQCAAEGATK(bi)GATK_;_GQCAAEGATK(bi)GATK_;_GQCAAEGATK(bi)GATK_;_GQCAAEGATK(bi)GATK_;_GQCAAEGATK(bi)GATK_;_GQCAAEGATK(bi)GATK_;_GQCAAEGATK(bi)GATK_;…	3.54394e-06	4.00278	3.95466	25.6527	25.543	25.7806	21.8524	21.7041	21.5557
PF3D7_0113000	Plasmodium falciparum 3D7	glutamic acid-rich protein GARP	GARP	Previous IDs: MAL1P3.06;PFA0620c	1	0	Biotin (K)	0	1	3	533;530	NA	KMAKIEEAELQKQK	_KMAK(bi)IEEAELQKQK_;_KMAK(bi)IEEAELQKQK_;_KMAK(bi)IEEAELQKQK_;_K(bi)MAKIEEAELQKQK_;_K(bi)MAKIEEAELQKQK_;_KMAK(bi)IEEAELQKQK_;_KMAK(bi)IEEAELQKQK_;_KMAK(bi)IEEAELQKQK_;_KMAK(bi)IEEAELQKQK_;_K(bi)MAKIEEAELQKQK_;_KMAK(bi)IEEAELQKQK_;_K(bi)MAKIEEAELQKQK_;_K(bi)MAK(bi)IEEAELQKQK_;_K(bi)MAK(bi)IEEAELQKQK_;_K(bi)MAK(bi)IEEAELQKQK_;_K(bi)MAK(bi)IEEAELQKQK_;_K(bi)MAK(bi)IEEAELQKQK_;_K(bi)MAK(bi)IEEAELQKQ…	3.29396e-05	3.55593	3.94048	23.4814	23.178	23.1572	19.0114	19.5039	19.4798
PF3D7_0202000	Plasmodium falciparum 3D7	knob-associated histidine-rich protein	KAHRP	Previous IDs: PF02_0020;PFB0100c	1	0	3 Biotin (K)	0	3	3	354;359;351;364	NA	YSSFSSVNKYGKHGDEKHHSSK	_YSSFSSVNKYGK(bi)HGDEKHHSSK_;_YSSFSSVNKYGK(bi)HGDEKHHSSK_;_YSSFSSVNKYGK(bi)HGDEKHHSSK_;_YSSFSSVNKYGK(bi)HGDEKHHSSK_;_YSSFSSVNKYGK(bi)HGDEKHHSSK_;_YSSFSSVNKYGK(bi)HGDEKHHSSK_;_YSSFSSVNKYGK(bi)HGDEKHHSSK_;_YSSFSSVNKYGK(bi)HGDEKHHSSK_;_YSSFSSVNKYGK(bi)HGDEKHHSSK_;_YSSFSSVNKYGKHGDEK(bi)HHSSK_;_YSSFSSVNKYGK(bi)HGDEKHHSSK_;_YSSFSSVNKYGK(bi)HGDEKHHSSK_;_YSSFSSVNKYGK(bi)HGDEKHHSSK_;_YSSFSSVNKYGK(bi)HGDEK…	0.00262968	2.32914	3.93903	23.4569	22.822	21.6404	19.1734	18.6372	18.2917
PF3D7_0936800	Plasmodium falciparum 3D7	Plasmodium exported protein (PHISTc), unknown function	N/A	Previous IDs: PFI1780w	1	0	Biotin (K)	0	1	3	267	NA	GIFAKGYLGEVESETIKKK	_GIFAK(bi)GYLGEVESETIKKK_;_GIFAK(bi)GYLGEVESETIKKK_;_GIFAK(bi)GYLGEVESETIKKK_;_GIFAK(bi)GYLGEVESETIKKK_;_GIFAK(bi)GYLGEVESETIKKK_;_GIFAK(bi)GYLGEVESETIKKK_;_GIFAK(bi)GYLGEVESETIKKK_;_GIFAK(bi)GYLGEVESETIKKK_;_GIFAK(bi)GYLGEVESETIKKK_;_GIFAK(bi)GYLGEVESETIKKK_;_GIFAK(bi)GYLGEVESETIKKK_;_GIFAK(bi)GYLGEVESETIKKK_;_GIFAK(bi)GYLGEVESETIKKK_;_GIFAK(bi)GYLGEVESETIKKK_;_GIFAK(bi)GYLGEVESETIKKK_;_GIFAK(bi…	0.000306795	3.0037	3.93889	25.6418	25.89	25.1449	22.0834	21.578	21.1987
PF3D7_0905400	Plasmodium falciparum 3D7	high molecular weight rhoptry protein 3	RhopH3	Previous IDs: PFI0265c	1	0	2 Biotin (K)	0	2	2	852;846	NA	KGLEFYKSSLK	_KGLEFYK(bi)SSLK_;_KGLEFYK(bi)SSLK_;_KGLEFYK(bi)SSLK_;_KGLEFYK(bi)SSLK_;_KGLEFYK(bi)SSLK_;_KGLEFYK(bi)SSLK_;_KGLEFYK(bi)SSLK_;_KGLEFYK(bi)SSLK_;_KGLEFYK(bi)SSLK_;_KGLEFYK(bi)SSLK_;_KGLEFYK(bi)SSLK_;_KGLEFYK(bi)SSLK_;_KGLEFYK(bi)SSLK_;_KGLEFYK(bi)SSLK_;_K(bi)GLEFYK(bi)SSLK_;_K(bi)GLEFYK(bi)SSLK_;_K(bi)GLEFYK(bi)SSLK_;_K(bi)GLEFYK(bi)SSLK_;_K(bi)GLEFYK(bi)SSLK_;_K(bi)GLEFYK(bi)SSLK_;_K(bi)GLEFYKS(p…	0.000676489	2.76871	3.92661	22.3145	22.9441	22.6545	19.1278	19.0314	17.974
P48426	Homo sapiens (Human)	Phosphatidylinositol 5-phosphate 4-kinase type-2 alpha (EC 2.7.1.149) (1-phosphatidylinositol 5-phosphate 4-kinase 2-alpha) (Diphosphoinositide kinase 2-alpha) (PIP5KIII) (Phosphatidylinositol 5-Phosphate 4-Kinase) (PI5P4Kalpha) (Phosphatidylinositol 5-phosphate 4-kinase type II alpha) (PI(5)P 4-kinase type II alpha) (PIP4KII-alpha) (PtdIns(4)P-5-kinase B isoform) (PtdIns(4)P-5-kinase C isoform) …	PIP4K2A PI5P4KA PIP5K2 PIP5K2A	NA	0	1	2 Biotin (K)	0	2	3	375;378	NA	AAHAAKTVKHGAGAEISTVNPEQYSKR	_AAHAAK(bi)TVK(bi)HGAGAEISTVNPEQYSKR_;_AAHAAK(bi)TVK(bi)HGAGAEISTVNPEQYSKR_;_AAHAAK(bi)TVK(bi)HGAGAEISTVNPEQYSKR_;_AAHAAK(bi)TVK(bi)HGAGAEISTVNPEQYSKR_;_AAHAAK(bi)TVK(bi)HGAGAEISTVNPEQYSKR_;_AAHAAK(bi)TVK(bi)HGAGAEISTVNPEQYSKR_;_AAHAAK(bi)TVK(bi)HGAGAEISTVNPEQYSKR_;_AAHAAK(bi)TVK(bi)HGAGAEISTVNPEQYSKR_;_AAHAAK(bi)TVK(bi)HGAGAEISTVNPEQYSKR_;_AAHAAK(bi)TVK(bi)HGAGAEISTVNPEQYSKR_;_AAHAAK(bi)TVK(bi)H…	0.000101764	3.28296	3.92632	22.753	22.6554	22.6626	19.2245	18.7102	18.3574
P78356	Homo sapiens (Human)	Phosphatidylinositol 5-phosphate 4-kinase type-2 beta (EC 2.7.1.149) (1-phosphatidylinositol 5-phosphate 4-kinase 2-beta) (Diphosphoinositide kinase 2-beta) (Phosphatidylinositol 5-phosphate 4-kinase type II beta) (PI(5)P 4-kinase type II beta) (PIP4KII-beta) (PtdIns(5)P-4-kinase isoform 2-beta)	PIP4K2B PIP5K2B	NA	0	1	2 Biotin (K)	0	2	3	385;388	NA	AAHAAKTVKHGAGAEISTVNPEQYSKR	_AAHAAK(bi)TVK(bi)HGAGAEISTVNPEQYSKR_;_AAHAAK(bi)TVK(bi)HGAGAEISTVNPEQYSKR_;_AAHAAK(bi)TVK(bi)HGAGAEISTVNPEQYSKR_;_AAHAAK(bi)TVK(bi)HGAGAEISTVNPEQYSKR_;_AAHAAK(bi)TVK(bi)HGAGAEISTVNPEQYSKR_;_AAHAAK(bi)TVK(bi)HGAGAEISTVNPEQYSKR_;_AAHAAK(bi)TVK(bi)HGAGAEISTVNPEQYSKR_;_AAHAAK(bi)TVK(bi)HGAGAEISTVNPEQYSKR_;_AAHAAK(bi)TVK(bi)HGAGAEISTVNPEQYSKR_;_AAHAAK(bi)TVK(bi)HGAGAEISTVNPEQYSKR_;_AAHAAK(bi)TVK(bi)H…	0.000101764	3.28296	3.92632	22.753	22.6554	22.6626	19.2245	18.7102	18.3574
PF3D7_0202000	Plasmodium falciparum 3D7	knob-associated histidine-rich protein	KAHRP	Previous IDs: PF02_0020;PFB0100c	1	0	Biotin (K)	0	1	3	510;520;512	NA	STNAATPGAKDKTQGGKTDK	_STNAATPGAK(bi)DKTQGGKTDK_;_STNAATPGAK(bi)DKTQGGKTDK_;_STNAATPGAKDKTQGGKTDK(bi)_;_STNAATPGAKDK(bi)TQGGKTDK_;_STNAATPGAK(bi)DKTQGGKTDK_;_STNAATPGAKDK(bi)TQGGKTDK_;_STNAATPGAKDK(bi)TQGGKTDK_;_STNAATPGAK(bi)DKTQGGKTDK_;_STNAATPGAKDKTQGGKTDK(bi)_;_STNAATPGAKDK(bi)TQGGKTDK_;_STNAATPGAKDKTQGGKTDK(bi)_;_STNAATPGAKDK(bi)TQGGKTDK_;_STNAATPGAKDK(bi)TQGGKTDK_;_STNAATPGAK(bi)DKTQGGKTDK_;_STNAATPGAKDK(bi)TQGG…	0.00125455	2.57407	3.91534	23.4445	22.3794	23.202	18.3994	19.2797	19.6008
PF3D7_0202000	Plasmodium falciparum 3D7	knob-associated histidine-rich protein	KAHRP	Previous IDs: PF02_0020;PFB0100c	1	0	2 Biotin (K)	0	2	3	541;520;531;545	NA	TDKTGASTNAATNKGQCAAEGATKGATK	_TDKTGASTNAATNKGQCAAEGATK(bi)GATK_;_TDKTGASTNAATNKGQCAAEGATK(bi)GATK_;_TDK(bi)TGASTNAATNKGQCAAEGATKGATK_;_TDKTGASTNAATNK(bi)GQCAAEGATKGATK_;_TDKTGASTNAATNKGQCAAEGATK(bi)GATK_;_TDKTGASTNAATNKGQCAAEGATK(bi)GATK_;_TDK(bi)TGASTNAATNKGQCAAEGATKGATK_;_TDKTGASTNAATNK(bi)GQCAAEGATKGATK_;_TDKTGASTNAATNKGQCAAEGATK(bi)GATK_;_TDKTGASTNAATNKGQCAAEGATK(bi)GATK_;_TDK(bi)TGASTNAATNKGQCAAEGATKGATK_;_TDKTGASTNAATN…	0.00349811	2.23205	3.91207	23.4195	22.9898	23.2764	18.302	20.4444	19.203
PF3D7_0730900	Plasmodium falciparum 3D7	EMP1-trafficking protein	PTP4	Previous IDs: MAL7P1.171	1	0	Biotin (K)	0	1	3	915;906;914	NA	LSVSEFKNNFDGCLKKEVSVPR	_LSVSEFKNNFDGCLKK(bi)EVSVPR_;_LSVSEFKNNFDGCLKK(bi)EVSVPR_;_LSVSEFKNNFDGCLKK(bi)EVSVPR_;_LSVSEFKNNFDGCLKK(bi)EVSVPR_;_LSVSEFKNNFDGCLKK(bi)EVSVPR_;_LSVSEFKNNFDGCLKK(bi)EVSVPR_;_LSVSEFKNNFDGCLKK(bi)EVSVPR_;_LSVSEFKNNFDGCLKK(bi)EVSVPR_;_LSVSEFKNNFDGCLKK(bi)EVSVPR_;_LSVSEFKNNFDGCLKK(bi)EVSVPR_;_LSVSEFKNNFDGCLKK(bi)EVSVPR_;_LSVSEFKNNFDGCLKK(bi)EVSVPR_;_LSVSEFK(bi)NNFDGCLKK(bi)EVSVPR_;_LSVSEFK(bi)NNFDGC…	0.000584618	2.80867	3.89553	22.2749	23.1629	23.5076	19.0237	19.3568	18.8783
PF3D7_1301400	Plasmodium falciparum 3D7	Plasmodium exported protein (hyp12), unknown function	HYP12	Previous IDs: PF13_0073	1	0	Biotin (K)	0	1	2	283	NA	NLNSDLQYLRNPKGDFHVLSNEEYENR	_NLNSDLQYLRNPK(bi)GDFHVLSNEEYENR_;_NLNSDLQYLRNPK(bi)GDFHVLSNEEYENR_;_NLNSDLQYLRNPK(bi)GDFHVLSNEEYENR_;_NLNSDLQYLRNPK(bi)GDFHVLSNEEYENR_;_NLNSDLQYLRNPK(bi)GDFHVLSNEEYENR_;_NLNSDLQYLRNPK(bi)GDFHVLSNEEYENR_	0.000283606	3.01832	3.89429	23.381	22.9265	23.737	19.6089	19.7465	19.0062
P35612	Homo sapiens (Human)	Beta-adducin (Erythrocyte adducin subunit beta)	ADD2 ADDB	NA	0	1	Biotin (K)	0	1	2	612;607	NA	SAPASPVQSPAKEAETKSPLVSPSK	_SAPASPVQSPAKEAETK(bi)SPLVSPSK_;_SAPASPVQSPAK(bi)EAETKSPLVSPSK_;_SAPASPVQSPAKEAETK(bi)SPLVSPSK_;_SAPASPVQSPAKEAETK(bi)SPLVSPSK_;_SAPASPVQSPAKEAETK(bi)SPLVSPSK_;_SAPASPVQSPAKEAETK(bi)SPLVSPSK_;_SAPASPVQSPAKEAETK(bi)SPLVSPSK_	0.000223026	3.0838	3.88147	22.7388	22.3501	23.1289	19.2194	18.4994	18.8546
P00915	Homo sapiens (Human)	Carbonic anhydrase 1 (EC 4.2.1.1) (Carbonate dehydratase I) (Carbonic anhydrase B) (CAB) (Carbonic anhydrase I) (CA-I)	CA1	NA	0	1	Biotin (K)	0	1	2	46	NA	TSETKHDTSLKPISVSYNPATAK	_TSETKHDTSLK(bi)PISVSYNPATAK_;_TSETKHDTSLK(bi)PISVSYNPATAK_;_TSETKHDTSLK(bi)PISVSYNPATAK_;_TSETKHDTSLK(bi)PISVSYNPATAK_;_TSETKHDTSLK(bi)PISVSYNPATAK_;_TSETKHDTSLK(bi)PISVSYNPATAK_;_TSETKHDTSLK(bi)PISVSYNPATAK_;_TSETKHDTSLK(bi)PISVSYNPATAK_;_TSETKHDTSLK(bi)PISVSYNPATAK_	0.00104992	2.62415	3.87775	23.0495	21.9565	22.9047	18.2525	19.2939	18.7312
PF3D7_0730800	Plasmodium falciparum 3D7	Plasmodium exported protein, unknown function	N/A	Previous IDs: MAL7P1.170;PF3D7_0730800.1;PF3D7_0730800.2	1	0	Biotin (K)	0	1	3	171;167;161	NA	NIEEEGEESIKKDCDALKDGFK	_NIEEEGEESIKKDCDALKDGFK(bi)_;_NIEEEGEESIKKDCDALK(bi)DGFK_;_NIEEEGEESIKKDCDALK(bi)DGFK_;_NIEEEGEESIKKDCDALK(bi)DGFK_;_NIEEEGEESIKKDCDALK(bi)DGFK_;_NIEEEGEESIKK(bi)DCDALKDGFK_;_NIEEEGEESIKKDCDALK(bi)DGFK_;_NIEEEGEESIKKDCDALK(bi)DGFK_;_NIEEEGEESIKKDCDALK(bi)DGFK_;_NIEEEGEESIKKDCDALK(bi)DGFK_;_NIEEEGEESIKKDCDALK(bi)DGFK_;_NIEEEGEESIKKDCDALK(bi)DGFK_	0.00515469	2.08844	3.87477	23.3547	23.9039	21.5992	18.9583	19.1823	19.0928
PF3D7_0201900	Plasmodium falciparum 3D7	erythrocyte membrane protein 3	EMP3	Previous IDs: PF02_0019;PFB0095c	1	0	Biotin (K)	0	1	3	889;911;999;1021;1043;887;909;997;1019;1041	NA	ARENLEEYNETDLAKGKEVTNK	_ARENLEEYNETDLAKGK(bi)EVTNK_;_ARENLEEYNETDLAK(bi)GKEVTNK_;_ARENLEEYNETDLAK(bi)GKEVTNK_;_ARENLEEYNETDLAK(bi)GKEVTNK_;_ARENLEEYNETDLAKGK(bi)EVTNK_;_ARENLEEYNETDLAKGK(bi)EVTNK_;_ARENLEEYNETDLAKGK(bi)EVTNK_;_ARENLEEYNETDLAKGK(bi)EVTNK_;_ARENLEEYNETDLAK(bi)GKEVTNK_;_ARENLEEYNETDLAK(bi)GKEVTNK_;_ARENLEEYNETDLAK(bi)GKEVTNK_;_ARENLEEYNETDLAK(bi)GKEVTNK_;_ARENLEEYNETDLAKGK(bi)EVTNK_;_ARENLEEYNETDLAK(bi)GK…	0.00161255	2.49468	3.86097	22.7902	22.925	22.7307	18.1525	19.8874	18.823
PF3D7_0702000	Plasmodium falciparum 3D7	Plasmodium exported protein (hyp12), unknown function	N/A	Previous IDs: MAL7P1.6	1	0	Biotin (K)	0	1	1	212	NA	AKHIVYDTAK	_AK(bi)HIVYDTAK_;_AK(bi)HIVYDTAK_;_AK(bi)HIVYDTAK_;_AK(bi)HIVYDTAK_;_AK(bi)HIVYDTAK_;_AK(bi)HIVYDTAK_;_AK(bi)HIVYDTAK_;_AK(bi)HIVYDTAK_;_AK(bi)HIVYDTAK_;_AK(bi)HIVYDTAK_;_AK(bi)HIVYDTAK_;_AK(bi)HIVYDTAK_;_AK(bi)HIVYDTAK_;_AK(bi)HIVYDTAK_;_AK(bi)HIVYDTAK_	0.0040874	2.17355	3.857	23.5523	23.7792	23.1716	19.5533	18.6056	20.7732
PF3D7_0202000	Plasmodium falciparum 3D7	knob-associated histidine-rich protein	KAHRP	Previous IDs: PF02_0020;PFB0100c	1	0	Biotin (K);Phospho (STY)	1	1	2	354;351	345;347;343	YSSFSSVNKYGKHGDEK	_YSSFSSVNKYGK(bi)HGDEK_;_YSSFSSVNKYGK(bi)HGDEK_;_YSSFSSVNKYGK(bi)HGDEK_;_YSSFSSVNKYGK(bi)HGDEK_;_YSSFSSVNKYGK(bi)HGDEK_;_YSSFSSVNKYGK(bi)HGDEK_;_YSSFSSVNKYGK(bi)HGDEK_;_YSSFSSVNKYGK(bi)HGDEK_;_YSSFSSVNKYGK(bi)HGDEK_;_YSSFSSVNKYGK(bi)HGDEK_;_YSSFSSVNKYGK(bi)HGDEK_;_YSSFSSVNKYGK(bi)HGDEK_;_YSSFSSVNKYGK(bi)HGDEK_;_YSSFSSVNKYGK(bi)HGDEK_;_YSSFSSVNKYGK(bi)HGDEK_;_YSSFSSVNKYGK(bi)HGDEK_;_YSSFSSVNKYGK(b…	0.0292586	1.43861	3.8546	24.1257	23.4673	23.4861	21.9781	18.0909	19.4464
PF3D7_0202000	Plasmodium falciparum 3D7	knob-associated histidine-rich protein	KAHRP	Previous IDs: PF02_0020;PFB0100c	1	0	Biotin (K)	0	1	3	510;500;517;512	NA	VDSTSADNKSTNAATPGAKDKTQGGK	_VDSTSADNKSTNAATPGAK(bi)DKTQGGK_;_VDSTSADNKSTNAATPGAK(bi)DKTQGGK_;_VDSTSADNK(bi)STNAATPGAKDKTQGGK_;_VDSTSADNK(bi)STNAATPGAKDKTQGGK_;_VDSTSADNKSTNAATPGAK(bi)DKTQGGK_;_VDSTSADNKSTNAATPGAK(bi)DKTQGGK_;_VDSTSADNKSTNAATPGAK(bi)DKTQGGK_;_VDSTSADNK(bi)STNAATPGAKDKTQGGK_;_VDSTSADNKSTNAATPGAKDKTQGGK(bi)_;_VDSTSADNKSTNAATPGAK(bi)DKTQGGK_;_VDSTSADNK(bi)STNAATPGAKDKTQGGK_;_VDSTSADNKSTNAATPGAK(bi)DKTQGGK_;_VD…	0.000169279	3.14743	3.84599	23.1426	23.0888	23.3586	18.894	19.8303	19.3278
PF3D7_0202000	Plasmodium falciparum 3D7	knob-associated histidine-rich protein	KAHRP	Previous IDs: PF02_0020;PFB0100c	1	0	Biotin (K)	0	1	3	565;561;555	NA	EATKEASTSKEATKEASTSK	_EATKEASTSKEATK(bi)EASTSK_;_EATKEASTSKEATK(bi)EASTSK_;_EATKEASTSK(bi)EATKEASTSK_;_EATK(bi)EASTSKEATKEASTSK_;_EATKEASTSKEATK(bi)EASTSK_;_EATKEASTSKEATK(bi)EASTSK_;_EATKEASTSK(bi)EATKEASTSK_;_EATK(bi)EASTSKEATKEASTSK_;_EATKEASTSKEATK(bi)EASTSK_;_EATKEASTSKEATK(bi)EASTSK_;_EATKEASTSKEATK(bi)EASTSK_;_EATKEASTSK(bi)EATKEASTSK_;_EATK(bi)EASTSKEATKEASTSK_;_EATK(bi)EASTSKEATKEASTSK_;_EATKEASTSKEATK(bi)EA…	0.00381707	2.199	3.83168	23.4067	23.1078	23.7007	19.1591	20.7784	18.7828
P48426	Homo sapiens (Human)	Phosphatidylinositol 5-phosphate 4-kinase type-2 alpha (EC 2.7.1.149) (1-phosphatidylinositol 5-phosphate 4-kinase 2-alpha) (Diphosphoinositide kinase 2-alpha) (PIP5KIII) (Phosphatidylinositol 5-Phosphate 4-Kinase) (PI5P4Kalpha) (Phosphatidylinositol 5-phosphate 4-kinase type II alpha) (PI(5)P 4-kinase type II alpha) (PIP4KII-alpha) (PtdIns(4)P-5-kinase B isoform) (PtdIns(4)P-5-kinase C isoform) …	PIP4K2A PI5P4KA PIP5K2 PIP5K2A	NA	0	1	Biotin (K)	0	1	2	234;228	NA	AKELPTLKDNDFINEGQK	_AKELPTLK(bi)DNDFINEGQK_;_AKELPTLK(bi)DNDFINEGQK_;_AK(bi)ELPTLKDNDFINEGQK_;_AKELPTLK(bi)DNDFINEGQK_;_AK(bi)ELPTLKDNDFINEGQK_;_AKELPTLK(bi)DNDFINEGQK_;_AK(bi)ELPTLKDNDFINEGQK_;_AKELPTLK(bi)DNDFINEGQK_;_AK(bi)ELPTLKDNDFINEGQK_;_AKELPTLK(bi)DNDFINEGQK_;_AK(bi)ELPTLKDNDFINEGQK_;_AKELPTLK(bi)DNDFINEGQK_;_AK(bi)ELPTLKDNDFINEGQK_;_AK(bi)ELPTLKDNDFINEGQK_	0.000464986	2.87505	3.82777	22.6814	23.5635	22.3978	18.993	19.2455	18.9208
PF3D7_0401800	Plasmodium falciparum 3D7	Plasmodium exported protein (PHISTb), unknown function	PfD80	Previous IDs: MAL4P1.16;PFD0080c	1	0	Biotin (K)	0	1	2	480	NA	KILCYCASKNK	_KILCYCASK(bi)NK_;_KILCYCASK(bi)NK_;_KILCYCASK(bi)NK_;_KILCYCASK(bi)NK_;_KILCYCASK(bi)NK_;_KILCYCASK(bi)NK_;_KILCYCASK(bi)NK_;_KILCYCASK(bi)NK_;_KILCYCASK(bi)NK_;_KILCYCASK(bi)NK_;_KILCYCASK(bi)NK_	0.0195289	1.59986	3.82432	20.7652	23.3372	23.5758	18.9508	17.8422	19.4122
PF3D7_0500800	Plasmodium falciparum 3D7	mature parasite-infected erythrocyte surface antigen	MESA	Previous IDs: MAL5P1.9;PFE0040c	1	0	Biotin (K)	0	1	2	1300;1302	NA	YNNGELEEYYKEKQNEEYFDEEYIIQSK	_YNNGELEEYYK(bi)EKQNEEYFDEEYIIQSK_;_YNNGELEEYYK(bi)EKQNEEYFDEEYIIQSK_;_YNNGELEEYYKEK(bi)QNEEYFDEEYIIQSK_;_YNNGELEEYYK(bi)EKQNEEYFDEEYIIQSK_;_YNNGELEEYYK(bi)EKQNEEYFDEEYIIQSK_;_YNNGELEEYYK(bi)EKQNEEYFDEEYIIQSK_;_YNNGELEEYYKEK(bi)QNEEYFDEEYIIQSK_;_YNNGELEEYYKEK(bi)QNEEYFDEEYIIQSK_;_YNNGELEEYYK(bi)EKQNEEYFDEEYIIQSK_;_YNNGELEEYYKEK(bi)QNEEYFDEEYIIQSK_;_YNNGELEEYYKEK(bi)QNEEYFDEEYIIQSK_	0.00574357	2.05008	3.81773	22.8971	24.4858	22.5992	19.1348	20.3078	19.0864
PF3D7_1301400	Plasmodium falciparum 3D7	Plasmodium exported protein (hyp12), unknown function	HYP12	Previous IDs: PF13_0073	1	0	2 Biotin (K)	0	2	2	180;191	NA	NMNIPKHNANSEYLLDKNLYDLK	_NMNIPK(bi)HNANSEYLLDK(bi)NLYDLK_;_NMNIPK(bi)HNANSEYLLDK(bi)NLYDLK_;_NMNIPK(bi)HNANSEYLLDK(bi)NLYDLK_;_NMNIPK(bi)HNANSEYLLDK(bi)NLYDLK_;_NMNIPK(bi)HNANSEYLLDK(bi)NLYDLK_;_NMNIPK(bi)HNANSEYLLDK(bi)NLYDLK_;_NMNIPK(bi)HNANSEYLLDK(bi)NLYDLK_;_NMNIPK(bi)HNANSEYLLDK(bi)NLYDLK_;_NM(ox)NIPK(bi)HNANSEYLLDK(bi)NLYDLK_;_NM(ox)NIPK(bi)HNANSEYLLDK(bi)NLYDLK_;_NM(ox)NIPK(bi)HNANSEYLLDK(bi)NLYDLK_;_NM(ox)NIPK(b…	0.000324854	2.9869	3.81232	23.0524	23.4548	22.6503	18.8488	19.6643	19.2073
PF3D7_1016300	Plasmodium falciparum 3D7	GBP130 protein	GBP130	Previous IDs: PF10_0159	1	0	Biotin (K)	0	1	3	546;646;553;653	NA	KHLEIFHKILTNTDPNDEVERR	_K(bi)HLEIFHKILTNTDPNDEVERR_;_KHLEIFHK(bi)ILTNTDPNDEVERR_;_KHLEIFHK(bi)ILTNTDPNDEVERR_;_K(bi)HLEIFHKILTNTDPNDEVERR_;_KHLEIFHK(bi)ILTNTDPNDEVERR_;_KHLEIFHK(bi)ILTNTDPNDEVERR_;_KHLEIFHK(bi)ILTNTDPNDEVERR_;_KHLEIFHK(bi)ILTNTDPNDEVERR_;_K(bi)HLEIFHKILTNTDPNDEVERR_;_K(bi)HLEIFHKILTNTDPNDEVERR_;_K(bi)HLEIFHKILTNTDPNDEVERR_	4.37227e-07	4.17728	3.80947	23.4569	23.2675	23.3863	19.5817	19.5979	19.5027
PF3D7_0202000	Plasmodium falciparum 3D7	knob-associated histidine-rich protein	KAHRP	Previous IDs: PF02_0020;PFB0100c	1	0	2 Biotin (K)	0	2	2	545;541;551	NA	GQCAAEGATKGATKEASTSK	_GQCAAEGATKGATK(bi)EASTSK_;_GQCAAEGATKGATK(bi)EASTSK_;_GQCAAEGATKGATK(bi)EASTSK_;_GQCAAEGATK(bi)GATKEASTSK_;_GQCAAEGATKGATK(bi)EASTSK_;_GQCAAEGATK(bi)GATKEASTSK_;_GQCAAEGATKGATK(bi)EASTSK_;_GQCAAEGATK(bi)GATKEASTSK_;_GQCAAEGATKGATK(bi)EASTSK_;_GQCAAEGATK(bi)GATKEASTSK_;_GQCAAEGATKGATK(bi)EASTSK_;_GQCAAEGATK(bi)GATKEASTSK_;_GQCAAEGATK(bi)GATKEASTSK_;_GQCAAEGATK(bi)GATKEASTSK_;_GQCAAEGATK(bi)GATK(b…	1.48471e-05	3.75229	3.80503	22.9857	22.6592	23.1177	19.2278	19.0001	19.1195
PF3D7_0401800	Plasmodium falciparum 3D7	Plasmodium exported protein (PHISTb), unknown function	PfD80	Previous IDs: MAL4P1.16;PFD0080c	1	0	Biotin (K)	0	1	2	413	NA	KHTWDKYELHLPGLAHGK	_KHTWDK(bi)YELHLPGLAHGK_;_KHTWDK(bi)YELHLPGLAHGK_;_KHTWDK(bi)YELHLPGLAHGK_;_KHTWDK(bi)YELHLPGLAHGK_;_KHTWDK(bi)YELHLPGLAHGK_;_KHTWDK(bi)YELHLPGLAHGK_;_KHTWDK(bi)YELHLPGLAHGK_;_KHTWDK(bi)YELHLPGLAHGK_;_KHTWDK(bi)YELHLPGLAHGK_	0.00111224	2.60924	3.80084	22.9209	22.9203	21.6333	18.8513	18.3952	18.8254
PF3D7_0202000	Plasmodium falciparum 3D7	knob-associated histidine-rich protein	KAHRP	Previous IDs: PF02_0020;PFB0100c	1	0	Biotin (K)	0	1	2	490;491	NA	NTAGENKKVDSTSADNK	_NTAGENK(bi)KVDSTSADNK_;_NTAGENK(bi)KVDSTSADNK_;_NTAGENK(bi)KVDSTSADNK_;_NTAGENK(bi)KVDSTSADNK_;_NTAGENK(bi)KVDSTSADNK_;_NTAGENK(bi)KVDSTSADNK_;_NTAGENKK(bi)VDSTSADNK_	0.00389384	2.19196	3.78511	23.0431	22.5931	23.0632	18.7543	20.3086	18.281
PF3D7_1016300	Plasmodium falciparum 3D7	GBP130 protein	GBP130	Previous IDs: PF10_0159	1	0	Biotin (K)	0	1	3	163;167;166	NA	QINIGDTENQKEGKNVKK	_QINIGDTENQKEGK(bi)NVKK_;_QINIGDTENQKEGK(bi)NVKK_;_QINIGDTENQKEGK(bi)NVKK_;_QINIGDTENQKEGK(bi)NVKK_;_QINIGDTENQKEGKNVKK(bi)_;_QINIGDTENQKEGK(bi)NVKK_;_QINIGDTENQKEGKNVK(bi)K_;_QINIGDTENQKEGKNVK(bi)K_;_QINIGDTENQKEGK(bi)NVKK_;_QINIGDTENQKEGK(bi)NVKK_;_QINIGDTENQKEGKNVKK(bi)_;_QINIGDTENQKEGK(bi)NVKK_;_QINIGDTENQKEGK(bi)NVKK_;_QINIGDTENQKEGK(bi)NVKK_	0.000279301	3.02111	3.76553	21.9775	22.3666	22.7867	19.011	18.2958	18.5273
PF3D7_0202000	Plasmodium falciparum 3D7	knob-associated histidine-rich protein	KAHRP	Previous IDs: PF02_0020;PFB0100c	1	0	2 Biotin (K)	0	2	3	517;520;531	NA	TQGGKTDKTGASTNAATNKGQCAAEGATK	_TQGGK(bi)TDKTGASTNAATNKGQCAAEGATK_;_TQGGK(bi)TDKTGASTNAATNKGQCAAEGATK_;_TQGGKTDK(bi)TGASTNAATNKGQCAAEGATK_;_TQGGKTDKTGASTNAATNK(bi)GQCAAEGATK_;_TQGGKTDKTGASTNAATNK(bi)GQCAAEGATK_;_TQGGKTDK(bi)TGASTNAATNKGQCAAEGATK_;_TQGGK(bi)TDKTGASTNAATNKGQCAAEGATK_;_TQGGKTDK(bi)TGASTNAATNKGQCAAEGATK_;_TQGGKTDK(bi)TGASTNAATNKGQCAAEGATK_;_TQGGKTDKTGASTNAATNK(bi)GQCAAEGATK_;_TQGGKTDKTGASTNAATNK(bi)GQCAAEGATK_;_TQ…	0.0051923	2.0858	3.75057	23.7055	23.0652	23.9389	20.4731	18.5704	20.4143
PF3D7_1301400	Plasmodium falciparum 3D7	Plasmodium exported protein (hyp12), unknown function	HYP12	Previous IDs: PF13_0073	1	0	Biotin (K)	0	1	2	258;259	NA	YKKNHVICSIIDFR	_YK(bi)KNHVICSIIDFR_;_YKK(bi)NHVICSIIDFR_;_YK(bi)KNHVICSIIDFR_;_YK(bi)KNHVICSIIDFR_;_YK(bi)KNHVICSIIDFR_;_YKK(bi)NHVICSIIDFR_;_YK(bi)KNHVICSIIDFR_;_YK(bi)KNHVICSIIDFR_;_YK(bi)KNHVICSIIDFR_;_YK(bi)KNHVICSIIDFR_;_YK(bi)KNHVICSIIDFR_;_YK(bi)KNHVICSIIDFR_	0.000292144	3.01303	3.74247	23.4067	24.2459	23.8605	20.378	19.7014	20.2064
PF3D7_0801000	Plasmodium falciparum 3D7	Plasmodium exported protein (PHISTc)	N/A	Previous IDs: PF08_0137	1	0	Biotin (K)	0	1	2	165;156;166	NA	KGSLGFDSFKK	_KGSLGFDSFK(bi)K_;_KGSLGFDSFK(bi)K_;_KGSLGFDSFK(bi)K_;_KGSLGFDSFK(bi)K_;_K(bi)GSLGFDSFKK_;_KGSLGFDSFK(bi)K_;_K(bi)GSLGFDSFKK_;_K(bi)GSLGFDSFKK_;_KGSLGFDSFK(bi)K_;_KGSLGFDSFK(bi)K_;_KGSLGFDSFK(bi)K_;_KGSLGFDSFK(bi)K_;_KGSLGFDSFK(bi)K_;_KGSLGFDSFK(bi)K_;_KGSLGFDSFK(bi)K_;_K(bi)GS(ph)LGFDSFKK_;_K(bi)GS(ph)LGFDSFKK_;_KGS(ph)LGFDSFK(bi)K_;_K(bi)GS(ph)LGFDSFKK_;_K(bi)GS(ph)LGFDSFKK_;_KGS(ph)LGFDSFK(bi)…	0.00732649	1.96208	3.74167	21.6827	23.598	23.9389	19.8186	19.0422	19.1339
PF3D7_0202000	Plasmodium falciparum 3D7	knob-associated histidine-rich protein	KAHRP	Previous IDs: PF02_0020;PFB0100c	1	0	Biotin (K);Phospho (STY)	1	1	3	581;585;575	578;574;580	EATKEASTSKGATKEASTTEGATK	_EATKEASTSK(bi)GATKEASTTEGATK_;_EATKEASTSK(bi)GATKEASTTEGATK_;_EATKEASTSK(bi)GATKEASTTEGATK_;_EATKEASTSK(bi)GATKEASTTEGATK_;_EATKEAS(ph)TSKGATK(bi)EASTTEGATK_;_EATKEAS(ph)TSKGATK(bi)EASTTEGATK_;_EATKEAS(ph)TSKGATK(bi)EASTTEGATK_;_EATKEAS(ph)TSKGATK(bi)EASTTEGATK_;_EATKEAS(ph)TSKGATK(bi)EASTTEGATK_;_EAT(ph)KEASTSKGATK(bi)EASTTEGATK_;_EATKEAS(ph)TSKGATK(bi)EASTTEGATK_;_EAT(ph)KEASTSKGATK(bi)EASTTEG…	0.000638392	2.78649	3.74125	22.7564	22.7379	23.0602	18.4986	19.0484	19.7838
PF3D7_0202000	Plasmodium falciparum 3D7	knob-associated histidine-rich protein	KAHRP	Previous IDs: PF02_0020;PFB0100c	1	0	2 Biotin (K)	0	2	3	490;491;500	NA	NTAGENKKVDSTSADNKSTNAATPGAK	_NTAGENK(bi)KVDSTSADNKSTNAATPGAK_;_NTAGENKK(bi)VDSTSADNKSTNAATPGAK_;_NTAGENKKVDSTSADNK(bi)STNAATPGAK_;_NTAGENK(bi)KVDSTSADNKSTNAATPGAK_;_NTAGENKK(bi)VDSTSADNKSTNAATPGAK_;_NTAGENKKVDSTSADNK(bi)STNAATPGAK_;_NTAGENKKVDSTSADNK(bi)STNAATPGAK_;_NTAGENK(bi)KVDSTSADNKSTNAATPGAK_;_NTAGENKKVDSTSADNK(bi)STNAATPGAK_;_NTAGENK(bi)KVDSTSADNKSTNAATPGAK_;_NTAGENKKVDSTSADNK(bi)STNAATPGAK_;_NTAGENK(bi)KVDSTSADNKSTN…	7.72361e-06	3.89467	3.74001	22.0759	22.263	22.4235	18.6566	18.491	18.3948
PF3D7_1016300	Plasmodium falciparum 3D7	GBP130 protein	GBP130	Previous IDs: PF10_0159	1	0	Biotin (K)	0	1	1	347;397;446;496;796	NA	KHLEVFHK	_K(bi)HLEVFHK_;_K(bi)HLEVFHK_;_K(bi)HLEVFHK_;_K(bi)HLEVFHK_;_K(bi)HLEVFHK_;_K(bi)HLEVFHK_;_K(bi)HLEVFHK_;_K(bi)HLEVFHK_;_K(bi)HLEVFHK_;_K(bi)HLEVFHK_;_K(bi)HLEVFHK_;_K(bi)HLEVFHK_;_K(bi)HLEVFHK_;_K(bi)HLEVFHK_;_K(bi)HLEVFHK_;_K(bi)HLEVFHK_;_K(bi)HLEVFHK_;_K(bi)HLEVFHK_;_K(bi)HLEVFHK_;_K(bi)HLEVFHK_;_K(bi)HLEVFHK_;_K(bi)HLEVFHK_;_K(bi)HLEVFHK_;_K(bi)HLEVFHK_;_K(bi)HLEVFHK_;_K(bi)HLEVFHK_;_K(bi)HLE…	0.0183794	1.61991	3.73788	29.5214	29.0423	29.3306	26.3323	23.6478	26.7005
PF3D7_0500800	Plasmodium falciparum 3D7	mature parasite-infected erythrocyte surface antigen	MESA	Previous IDs: MAL5P1.9;PFE0040c	1	0	Biotin (K)	0	1	2	1135;1136	NA	EVIIEEVKEEVKK	_EVIIEEVKEEVK(bi)K_;_EVIIEEVKEEVKK(bi)_;_EVIIEEVKEEVKK(bi)_;_EVIIEEVKEEVKK(bi)_;_EVIIEEVKEEVKK(bi)_;_EVIIEEVKEEVKK(bi)_	0.00117933	2.59301	3.73687	22.731	21.642	21.7136	18.4766	18.6681	17.7313
PF3D7_0201900	Plasmodium falciparum 3D7	erythrocyte membrane protein 3	EMP3	Previous IDs: PF02_0019;PFB0095c	1	0	Biotin (K)	0	1	2	821;843;865;931;953;975;823;845;867;933;955;977	NA	AHENLEEYNETDLAKGKEVTNK	_AHENLEEYNETDLAK(bi)GKEVTNK_;_AHENLEEYNETDLAK(bi)GKEVTNK_;_AHENLEEYNETDLAKGK(bi)EVTNK_;_AHENLEEYNETDLAK(bi)GKEVTNK_;_AHENLEEYNETDLAK(bi)GKEVTNK_;_AHENLEEYNETDLAKGK(bi)EVTNK_;_AHENLEEYNETDLAK(bi)GKEVTNK_;_AHENLEEYNETDLAK(bi)GKEVTNK_;_AHENLEEYNETDLAK(bi)GKEVTNK_;_AHENLEEYNETDLAKGK(bi)EVTNK_;_AHENLEEYNETDLAKGK(bi)EVTNK_;_AHENLEEYNETDLAK(bi)GKEVTNK_;_AHENLEEYNETDLAKGK(bi)EVTNK_;_AHENLEEYNETDLAK(bi)GK…	0.00181883	2.45507	3.73571	22.9814	23.1018	22.5374	18.9602	20.0401	18.4133
P11171	Homo sapiens (Human)	Protein 4.1 (P4.1) (4.1R) (Band 4.1) (EPB4.1) (Erythrocyte membrane protein band 4.1)	EPB41 E41P	NA	0	1	Biotin (K);Oxidation (M)	0	1	2	706	NA	NFMESVPEPRPSEWDKR	_NFM(ox)ESVPEPRPSEWDK(bi)R_;_NFM(ox)ESVPEPRPSEWDK(bi)R_;_NFM(ox)ESVPEPRPSEWDK(bi)R_;_NFM(ox)ESVPEPRPSEWDK(bi)R_;_NFM(ox)ESVPEPRPSEWDK(bi)R_;_NFM(ox)ESVPEPRPSEWDK(bi)R_;_NFMESVPEPRPSEWDK(bi)R_;_NFMESVPEPRPSEWDK(bi)R_;_NFMESVPEPRPSEWDK(bi)R_;_NFMESVPEPRPSEWDK(bi)R_;_NFMESVPEPRPSEWDK(bi)R_;_NFMESVPEPRPSEWDK(bi)R_;_NFMESVPEPRPSEWDK(bi)R_;_NFMESVPEPRPSEWDK(bi)R_;_NFMESVPEPRPSEWDK(bi)R_;_NFMESVPEPRPSEW…	0.000784332	2.71811	3.73159	22.1705	22.61	23.3265	18.5166	19.1609	19.2346
PF3D7_0221200	Plasmodium falciparum 3D7	Plasmodium exported protein (hyp15), unknown function	N/A	Previous IDs: PF02_0198;PFB0953w	1	0	Biotin (K)	0	1	2	125	NA	CFIKNNSLKSTSGIIR	_CFIKNNSLK(bi)STSGIIR_;_CFIKNNSLK(bi)STSGIIR_;_CFIKNNSLK(bi)STSGIIR_;_CFIKNNSLK(bi)STSGIIR_;_CFIKNNSLK(bi)STSGIIR_;_CFIKNNSLK(bi)STSGIIR_;_CFIKNNSLK(bi)STSGIIR_	0.00880551	1.89316	3.72921	20.526	22.6311	23.0376	18.3988	18.209	18.3993
PF3D7_1371900	Plasmodium falciparum 3D7	Plasmodium exported protein, unknown function	N/A	Previous IDs: MAL13P1.465	1	0	Biotin (K)	0	1	2	79;74	NA	INALTELKNYKSSVLK	_INALTELKNYKSSVLK(bi)_;_INALTELKNYK(bi)SSVLK_;_INALTELKNYK(bi)SSVLK_;_INALTELKNYK(bi)SSVLK_;_INALTELKNYK(bi)SSVLK_;_INALTELKNYK(bi)SSVLK_;_INALTELKNYKSSVLK(bi)_	0.00371663	2.20843	3.71759	21.7209	22.7157	21.9773	17.385	18.7059	19.1702
PF3D7_0831400	Plasmodium falciparum 3D7	Plasmodium exported protein, unknown function	N/A	Previous IDs: MAL8P1.206	1	0	Biotin (K)	0	1	1	173	NA	LNDQNLIEKCLCK	_LNDQNLIEK(bi)CLCK_;_LNDQNLIEK(bi)CLCK_;_LNDQNLIEK(bi)CLCK_;_LNDQNLIEK(bi)CLCK_;_LNDQNLIEK(bi)CLCK_;_LNDQNLIEK(bi)CLCK_;_LNDQNLIEK(bi)CLCK_;_LNDQNLIEK(bi)CLCK_;_LNDQNLIEK(bi)CLCK_;_LNDQNLIEK(bi)CLCK_;_LNDQNLIEK(bi)CLCK_;_LNDQNLIEK(bi)CLCK_	0.00136308	2.55064	3.71667	23.2144	22.1618	22.4609	18.2298	19.4039	19.0534
PF3D7_1201000	Plasmodium falciparum 3D7	Plasmodium exported protein (PHISTb), unknown function	N/A	Previous IDs: 2277.t00010;MAL12P1.10;PFL0050c	1	0	Biotin (K)	0	1	1	393	NA	VSNIKNNLR	_VSNIK(bi)NNLR_;_VSNIK(bi)NNLR_;_VSNIK(bi)NNLR_;_VSNIK(bi)NNLR_;_VSNIK(bi)NNLR_;_VSNIK(bi)NNLR_;_VSNIK(bi)NNLR_;_VSNIK(bi)NNLR_;_VSNIK(bi)NNLR_;_VSNIK(bi)NNLR_;_VSNIK(bi)NNLR_;_VSNIK(bi)NNLR_	6.27563e-06	3.89467	3.69913	24.9917	24.8138	25.1325	21.1545	21.274	21.4122
PF3D7_0500800	Plasmodium falciparum 3D7	mature parasite-infected erythrocyte surface antigen	MESA	Previous IDs: MAL5P1.9;PFE0040c	1	0	Biotin (K)	0	1	2	169;164	NA	EKEYLMKELEEMDESDVEK	_EKEYLMK(bi)ELEEMDESDVEK_;_EK(bi)EYLMKELEEMDESDVEK_;_EKEYLMK(bi)ELEEMDESDVEK_;_EK(bi)EYLMKELEEMDESDVEK_;_EKEYLMK(bi)ELEEMDESDVEK_;_EK(bi)EYLMKELEEMDESDVEK_;_EKEYLMK(bi)ELEEMDESDVEK_;_EKEYLMK(bi)ELEEMDESDVEK_;_EKEYLMK(bi)ELEEMDESDVEK_;_EK(bi)EYLMKELEEMDESDVEK_;_EKEYLMK(bi)ELEEMDESDVEK_;_EKEYLMK(bi)ELEEMDESDVEK_;_EKEYLMK(bi)ELEEM(ox)DESDVEK_;_EKEYLMK(bi)ELEEM(ox)DESDVEK_	0.00604736	2.03269	3.69411	22.9423	23.8381	22.5298	18.692	18.9813	20.5546
PF3D7_1016300	Plasmodium falciparum 3D7	GBP130 protein	GBP130	Previous IDs: PF10_0159	1	0	Biotin (K)	0	1	3	803	NA	KHLEVFHKILTNTDPNDEVERQNADNNEA	_KHLEVFHK(bi)ILTNTDPNDEVERQNADNNEA_;_KHLEVFHK(bi)ILTNTDPNDEVERQNADNNEA_;_KHLEVFHK(bi)ILTNTDPNDEVERQNADNNEA_;_KHLEVFHK(bi)ILTNTDPNDEVERQNADNNEA_;_KHLEVFHK(bi)ILTNTDPNDEVERQNADNNEA_;_KHLEVFHK(bi)ILTNTDPNDEVERQNADNNEA_	2.82137e-05	3.59123	3.68109	22.4706	22.4448	22.0839	18.8512	18.6633	18.4416
PF3D7_0201900	Plasmodium falciparum 3D7	erythrocyte membrane protein 3	EMP3	Previous IDs: PF02_0019;PFB0095c	1	0	Biotin (K)	0	1	1	1452;1751;1829;1894;2024;2089;2206;2245;2284	NA	NAANKGQQNTGLK	_NAANK(bi)GQQNTGLK_;_NAANK(bi)GQQNTGLK_;_NAANK(bi)GQQNTGLK_;_NAANK(bi)GQQNTGLK_;_NAANK(bi)GQQNTGLK_;_NAANK(bi)GQQNTGLK_;_NAANK(bi)GQQNTGLK_;_NAANK(bi)GQQNTGLK_;_NAANK(bi)GQQNTGLK_;_NAANK(bi)GQQNTGLK_;_NAANK(bi)GQQNTGLK_;_NAANK(bi)GQQNTGLK_;_NAANK(bi)GQQNTGLK_;_NAANK(bi)GQQNTGLK_;_NAANK(bi)GQQNTGLK_;_NAANK(bi)GQQNTGLK_;_NAANK(bi)GQQNTGLK_;_NAANK(bi)GQQNTGLK_;_NAANK(bi)GQQNTGLK_	0.000231396	3.07137	3.67934	23.287	23.2477	23.5156	19.3062	20.2231	19.483
PF3D7_1253400	Plasmodium falciparum 3D7	acyl-CoA synthetase	ACS3	Previous IDs: 2277.t00512;MAL12P1.509;PFL2570w	1	0	Biotin (K)	0	1	2	745	NA	LKGCAPISVNSENKDEEK	_LK(bi)GCAPISVNSENKDEEK_;_LK(bi)GCAPISVNSENKDEEK_;_LK(bi)GCAPISVNSENKDEEK_;_LK(bi)GCAPISVNSENKDEEK_;_LK(bi)GCAPISVNSENKDEEK_;_LK(bi)GCAPISVNSENKDEEK_	0.00764362	1.94656	3.6646	21.8276	21.9558	21.5578	18.6726	16.6728	19.002
PF3D7_1479000	Plasmodium falciparum 3D7	acyl-CoA synthetase	ACS1a	Previous IDs: PF14_0761	1	0	Biotin (K)	0	1	2	749	NA	LKGCAPISVNSENKDEEK	_LK(bi)GCAPISVNSENKDEEK_;_LK(bi)GCAPISVNSENKDEEK_;_LK(bi)GCAPISVNSENKDEEK_;_LK(bi)GCAPISVNSENKDEEK_;_LK(bi)GCAPISVNSENKDEEK_;_LK(bi)GCAPISVNSENKDEEK_	0.00764362	1.94656	3.6646	21.8276	21.9558	21.5578	18.6726	16.6728	19.002
PF3D7_1301400	Plasmodium falciparum 3D7	Plasmodium exported protein (hyp12), unknown function	HYP12	Previous IDs: PF13_0073	1	0	Biotin (K)	0	1	1	174	NA	SKNMNIPK	_SK(bi)NMNIPK_;_SK(bi)NMNIPK_;_SK(bi)NMNIPK_;_SK(bi)NMNIPK_;_SK(bi)NMNIPK_;_SK(bi)NMNIPK_;_SK(bi)NMNIPK_;_SK(bi)NMNIPK_;_SK(bi)NMNIPK_;_SK(bi)NMNIPK_;_SK(bi)NMNIPK_;_SK(bi)NMNIPK_;_SK(bi)NMNIPK_;_SK(bi)NMNIPK_;_SK(bi)NMNIPK_;_SK(bi)NMNIPK_;_SK(bi)NMNIPK_;_SK(bi)NMNIPK_;_SK(bi)NMNIPK_;_SK(bi)NMNIPK_;_SK(bi)NMNIPK_;_SK(bi)NMNIPK_;_SK(bi)NMNIPK_;_SK(bi)NMNIPK_;_SK(bi)NMNIPK_;_SK(bi)NMNIPK_;_SK(bi)NM…	7.80965e-05	3.34697	3.66363	25.4258	24.9131	25.5615	21.83	21.5845	21.495
P11171	Homo sapiens (Human)	Protein 4.1 (P4.1) (4.1R) (Band 4.1) (EPB4.1) (Erythrocyte membrane protein band 4.1)	EPB41 E41P	NA	0	1	Biotin (K)	0	1	1	581	NA	KTVVPK	_K(bi)TVVPK_;_K(bi)TVVPK_;_K(bi)TVVPK_;_K(bi)TVVPK_;_K(bi)TVVPK_;_K(bi)TVVPK_	0.000160469	3.15987	3.66101	23.1098	22.7848	23.2311	19.7249	18.9451	19.4726
Q8WZ42	Homo sapiens (Human)	Titin (EC 2.7.11.1) (Connectin) (Rhabdomyosarcoma antigen MU-RMS-40.14)	TTN	NA	0	1	Biotin (K)	0	1	1		NA	KTVVPK	_K(bi)TVVPK_;_K(bi)TVVPK_;_K(bi)TVVPK_;_K(bi)TVVPK_;_K(bi)TVVPK_;_K(bi)TVVPK_	0.000160469	3.15987	3.66101	23.1098	22.7848	23.2311	19.7249	18.9451	19.4726
PF3D7_0201900	Plasmodium falciparum 3D7	erythrocyte membrane protein 3	EMP3	Previous IDs: PF02_0019;PFB0095c	1	0	Biotin (K)	0	1	2	487	NA	LKSTFNPFKR	_LK(bi)STFNPFKR_;_LK(bi)STFNPFKR_;_LK(bi)STFNPFKR_;_LK(bi)STFNPFKR_;_LK(bi)STFNPFKR_;_LK(bi)STFNPFKR_	0.000967486	2.65003	3.65248	23.2132	22.7927	22.9113	19.9817	19.383	18.5952
PF3D7_0730900	Plasmodium falciparum 3D7	EMP1-trafficking protein	PTP4	Previous IDs: MAL7P1.171	1	0	Biotin (K);Phospho (STY)	1	1	1	2102	2097;2098;2100	GVNVQSSNTNKHMPR	_GVNVQSSNTNK(bi)HM(ox)PR_;_GVNVQSSNTNK(bi)HM(ox)PR_;_GVNVQSSNTNK(bi)HM(ox)PR_;_GVNVQSSNTNK(bi)HM(ox)PR_;_GVNVQSSNTNK(bi)HM(ox)PR_;_GVNVQSSNTNK(bi)HM(ox)PR_;_GVNVQSSNTNK(bi)HM(ox)PR_;_GVNVQSSNTNK(bi)HM(ox)PR_;_GVNVQSSNTNK(bi)HM(ox)PR_;_GVNVQSSNTNK(bi)HM(ox)PR_;_GVNVQSSNTNK(bi)HM(ox)PR_;_GVNVQSSNTNK(bi)HM(ox)PR_;_GVNVQS(ph)SNTNK(bi)HM(ox)PR_;_GVNVQS(ph)SNTNK(bi)HM(ox)PR_;_GVNVQS(ph)SNTNK(bi)HM(ox)P…	0.00016089	3.15987	3.64416	22.7696	22.8716	22.874	19.7091	18.85	19.0235
PF3D7_0936800	Plasmodium falciparum 3D7	Plasmodium exported protein (PHISTc), unknown function	N/A	Previous IDs: PFI1780w	1	0	Biotin (K)	0	1	2	302;307	NA	LQQHKVQPPKVQQQK	_LQQHK(bi)VQPPKVQQQK_;_LQQHK(bi)VQPPKVQQQK_;_LQQHK(bi)VQPPKVQQQK_;_LQQHK(bi)VQPPKVQQQK_;_LQQHK(bi)VQPPKVQQQK_;_LQQHK(bi)VQPPKVQQQK_;_LQQHK(bi)VQPPKVQQQK_;_LQQHK(bi)VQPPKVQQQK_;_LQQHK(bi)VQPPKVQQQK_;_LQQHK(bi)VQPPKVQQQK_;_LQQHK(bi)VQPPKVQQQK_;_LQQHK(bi)VQPPKVQQQK_;_LQQHK(bi)VQPPKVQQQK_;_LQQHK(bi)VQPPKVQQQK_;_LQQHK(bi)VQPPK(bi)VQQQK_;_LQQHK(bi)VQPPK(bi)VQQQK_;_LQQHK(bi)VQPPK(bi)VQQQK_;_LQQHK(bi)VQP…	4.17185e-05	3.50234	3.62952	23.1119	23.0237	23.4193	19.7945	19.5744	19.2975
P29972	Homo sapiens (Human)	Aquaporin-1 (AQP-1) (Aquaporin-CHIP) (Urine water channel) (Water channel protein for red blood cells and kidney proximal tubule)	AQP1 CHIP28	NA	0	1	Biotin (K)	0	1	2	267;269	NA	VWTSGQVEEYDLDADDINSRVEMKPK	_VWTSGQVEEYDLDADDINSRVEMK(bi)PK_;_VWTSGQVEEYDLDADDINSRVEMK(bi)PK_;_VWTSGQVEEYDLDADDINSRVEMK(bi)PK_;_VWTSGQVEEYDLDADDINSRVEMK(bi)PK_;_VWTSGQVEEYDLDADDINSRVEMK(bi)PK_;_VWTSGQVEEYDLDADDINSRVEMK(bi)PK_;_VWTSGQVEEYDLDADDINSRVEMK(bi)PK_;_VWTSGQVEEYDLDADDINSRVEMKPK(bi)_;_VWTSGQVEEYDLDADDINSRVEMK(bi)PK_;_VWTSGQVEEYDLDADDINSRVEM(ox)K(bi)PK_	0.00253461	2.3434	3.62829	22.5902	22.9985	22.0329	18.3156	18.603	19.8181
PF3D7_0500800	Plasmodium falciparum 3D7	mature parasite-infected erythrocyte surface antigen	MESA	Previous IDs: MAL5P1.9;PFE0040c	1	0	Biotin (K)	0	1	3	840	NA	VIGQEVIKGDVNEEGPENKDKVTK	_VIGQEVIK(bi)GDVNEEGPENKDKVTK_;_VIGQEVIK(bi)GDVNEEGPENKDKVTK_;_VIGQEVIK(bi)GDVNEEGPENKDKVTK_;_VIGQEVIK(bi)GDVNEEGPENKDKVTK_;_VIGQEVIK(bi)GDVNEEGPENKDKVTK_;_VIGQEVIK(bi)GDVNEEGPENKDKVTK_	0.00171241	2.47496	3.62828	22.471	22.4309	21.9257	19.5044	18.4718	17.9666
PF3D7_1001000	Plasmodium falciparum 3D7	Plasmodium exported protein (hyp12), unknown function	PfJ13	Previous IDs: PF10_0013	1	0	Biotin (K)	0	1	1	117	NA	TKNNITNISSK	_TK(bi)NNITNISSK_;_TK(bi)NNITNISSK_;_TK(bi)NNITNISSK_;_TK(bi)NNITNISSK_;_TK(bi)NNITNISSK_;_TK(bi)NNITNISSK_	0.000377014	2.93835	3.60101	22.8584	22.7215	23.0004	19.2789	19.7942	18.7043
PF3D7_0401800	Plasmodium falciparum 3D7	Plasmodium exported protein (PHISTb), unknown function	PfD80	Previous IDs: MAL4P1.16;PFD0080c	1	0	Biotin (K);Oxidation (M)	0	1	1	390	NA	TKDPNMFNK	_TK(bi)DPNM(ox)FNK_;_TK(bi)DPNM(ox)FNK_;_TK(bi)DPNM(ox)FNK_;_TK(bi)DPNM(ox)FNK_;_TK(bi)DPNM(ox)FNK_;_TK(bi)DPNM(ox)FNK_;_TK(bi)DPNM(ox)FNK_;_TK(bi)DPNM(ox)FNK_;_TK(bi)DPNM(ox)FNK_;_TK(bi)DPNM(ox)FNK_;_TK(bi)DPNM(ox)FNK_;_TK(bi)DPNM(ox)FNK_;_TK(bi)DPNM(ox)FNK_;_TK(bi)DPNM(ox)FNK_;_TK(bi)DPNMFNK_;_TK(bi)DPNMFNK_;_TK(bi)DPNMFNK_;_TK(bi)DPNMFNK_;_TK(bi)DPNMFNK_;_TK(bi)DPNMFNK_;_TK(bi)DPNMFNK_;_TK(bi)…	0.00383173	2.19787	3.59865	22.6034	23.0213	23.3951	19.5407	20.291	18.3921
PF3D7_0113200	Plasmodium falciparum 3D7	Plasmodium exported protein, unknown function	N/A	Previous IDs: MAL1P3.08;PFA0630c	1	0	Biotin (K)	0	1	3	129	NA	QTKNSGLSHMFSSEINKTQTNESNNKR	_QTK(bi)NSGLSHMFSSEINKTQTNESNNKR_;_QTK(bi)NSGLSHMFSSEINKTQTNESNNKR_;_QTK(bi)NSGLSHMFSSEINKTQTNESNNKR_;_QTK(bi)NSGLSHMFSSEINKTQTNESNNKR_;_QTK(bi)NSGLSHMFSSEINKTQTNESNNKR_;_QTK(bi)NSGLSHMFSSEINKTQTNESNNKR_;_QTK(bi)NSGLSHMFSSEINKTQTNESNNKR_;_QTK(bi)NSGLSHMFSSEINKTQTNESNNKR_;_QTK(bi)NSGLSHMFSSEINKTQTNESNNKR_;_QTK(bi)NSGLSHMFSSEINKTQTNESNNKR_	0.000919628	2.66451	3.59474	23.0174	22.246	22.3023	18.2787	19.2668	19.2359
PF3D7_0113000	Plasmodium falciparum 3D7	glutamic acid-rich protein GARP	GARP	Previous IDs: MAL1P3.06;PFA0620c	1	0	Biotin (K)	0	1	2	503;499	NA	SKVEEKNLSIQEQLIGTIGR	_SKVEEK(bi)NLSIQEQLIGTIGR_;_SKVEEK(bi)NLSIQEQLIGTIGR_;_SKVEEK(bi)NLSIQEQLIGTIGR_;_SKVEEK(bi)NLSIQEQLIGTIGR_;_SKVEEK(bi)NLSIQEQLIGTIGR_;_SKVEEK(bi)NLSIQEQLIGTIGR_;_SKVEEK(bi)NLSIQEQLIGTIGR_;_SKVEEK(bi)NLSIQEQLIGTIGR_;_SKVEEK(bi)NLSIQEQLIGTIGR_;_SKVEEK(bi)NLSIQEQLIGTIGR_;_SKVEEK(bi)NLSIQEQLIGTIGR_;_SKVEEK(bi)NLSIQEQLIGTIGR_;_SKVEEK(bi)NLSIQEQLIGTIGR_;_SKVEEK(bi)NLSIQEQLIGTIGR_;_SK(bi)VEEKNLSIQEQLIG…	0.000182478	3.12444	3.59464	28.7602	29.3596	28.9425	25.8317	25.2301	25.2166
PF3D7_1301400	Plasmodium falciparum 3D7	Plasmodium exported protein (hyp12), unknown function	HYP12	Previous IDs: PF13_0073	1	0	Biotin (K)	0	1	2	200	NA	TFKNLNAAKK	_TFK(bi)NLNAAKK_;_TFK(bi)NLNAAKK_;_TFK(bi)NLNAAKK_;_TFK(bi)NLNAAKK_;_TFK(bi)NLNAAKK_;_TFK(bi)NLNAAKK_;_TFK(bi)NLNAAKK_;_TFK(bi)NLNAAKK_;_TFK(bi)NLNAAKK_;_TFK(bi)NLNAAKK_;_TFK(bi)NLNAAKK_;_TFK(bi)NLNAAKK_;_TFK(bi)NLNAAKK_;_TFK(bi)NLNAAKK_;_TFK(bi)NLNAAKK_;_TFK(bi)NLNAAKK_;_TFK(bi)NLNAAKK_;_TFK(bi)NLNAAKK_	0.000100332	3.28578	3.58976	23.5866	23.3097	23.5367	19.5783	20.3008	19.7846
PF3D7_0113000	Plasmodium falciparum 3D7	glutamic acid-rich protein GARP	GARP	Previous IDs: MAL1P3.06;PFA0620c	1	0	Biotin (K)	0	1	1	533	NA	MAKIEEAELQK	_M(ox)AK(bi)IEEAELQK_;_M(ox)AK(bi)IEEAELQK_;_M(ox)AK(bi)IEEAELQK_;_M(ox)AK(bi)IEEAELQK_;_M(ox)AK(bi)IEEAELQK_;_M(ox)AK(bi)IEEAELQK_;_M(ox)AK(bi)IEEAELQK_;_M(ox)AK(bi)IEEAELQK_;_M(ox)AK(bi)IEEAELQK_;_M(ox)AK(bi)IEEAELQK_;_M(ox)AK(bi)IEEAELQK_;_M(ox)AK(bi)IEEAELQK_;_M(ox)AK(bi)IEEAELQK_;_M(ox)AK(bi)IEEAELQK_;_M(ox)AK(bi)IEEAELQK_;_M(ox)AK(bi)IEEAELQK_;_M(ox)AK(bi)IEEAELQK_;_M(ox)AK(bi)IEEAELQK_;_M(…	4.46292e-05	3.48031	3.58967	27.8915	27.2531	27.473	23.9144	23.9495	23.9847
PF3D7_0532400	Plasmodium falciparum 3D7	lysine-rich membrane-associated PHISTb protein	LyMP	Previous IDs: MAL5P1.315;PFE1605w	1	0	Biotin (K);Oxidation (M)	0	1	2	414;433	NA	KNPEMLTENQINEEENENTKVGGANTK	_K(bi)NPEM(ox)LTENQINEEENENTKVGGANTK_;_KNPEM(ox)LTENQINEEENENTK(bi)VGGANTK_;_K(bi)NPEM(ox)LTENQINEEENENTKVGGANTK_;_K(bi)NPEM(ox)LTENQINEEENENTKVGGANTK_;_KNPEM(ox)LTENQINEEENENTK(bi)VGGANTK_;_KNPEM(ox)LTENQINEEENENTK(bi)VGGANTK_;_K(bi)NPEM(ox)LTENQINEEENENTKVGGANTK_;_K(bi)NPEM(ox)LTENQINEEENENTKVGGANTK_;_KNPEM(ox)LTENQINEEENENTK(bi)VGGANTK_;_K(bi)NPEM(ox)LTENQINEEENENTKVGGANTK_;_KNPEM(ox)LTENQINEE…	0.02795	1.45606	3.57208	20.5731	23.4037	23.8019	18.9146	18.5684	19.5794
PF3D7_1401200	Plasmodium falciparum 3D7	Plasmodium exported protein, unknown function	N/A	Previous IDs: PF14_0014	1	0	Biotin (K)	0	1	1	136	NA	MPSKYDYLR	_MPSK(bi)YDYLR_;_MPSK(bi)YDYLR_;_MPSK(bi)YDYLR_;_MPSK(bi)YDYLR_;_MPSK(bi)YDYLR_;_MPSK(bi)YDYLR_;_MPSK(bi)YDYLR_;_MPSK(bi)YDYLR_;_MPSK(bi)YDYLR_;_MPSK(bi)YDYLR_;_MPSK(bi)YDYLR_;_MPSK(bi)YDYLR_;_MPSK(bi)YDYLR_;_M(ox)PSK(bi)YDYLR_;_M(ox)PSK(bi)YDYLR_;_M(ox)PSK(bi)YDYLR_;_M(ox)PSK(bi)YDYLR_;_M(ox)PSK(bi)YDYLR_;_M(ox)PSK(bi)YDYLR_;_M(ox)PSK(bi)YDYLR_;_M(ox)PSK(bi)YDYLR_;_M(ox)PSK(bi)YDYLR_;_M(ox)PSK(b…	0.0372926	1.34712	3.56648	25.4414	25.1829	25.6206	23.8486	21.8485	19.8484
PF3D7_0500800	Plasmodium falciparum 3D7	mature parasite-infected erythrocyte surface antigen	MESA	Previous IDs: MAL5P1.9;PFE0040c	1	0	Biotin (K)	0	1	2	1373;1378	NA	QKAELDKK	_QK(bi)AELDKK_;_QK(bi)AELDKK_;_QK(bi)AELDKK_;_QK(bi)AELDKK_;_QK(bi)AELDKK_;_QKAELDK(bi)K_;_QK(bi)AELDKK_;_QKAELDK(bi)K_;_QK(bi)AELDKK_;_QKAELDK(bi)K_;_QK(bi)AELDKK_;_QKAELDK(bi)K_;_QK(bi)AELDKK_;_QK(bi)AELDKK_;_QK(bi)AELDKK_;_QK(bi)AELDKK_;_QK(bi)AELDKK_;_QK(bi)AELDKK_;_QK(bi)AELDKK_;_QK(bi)AELDKK_;_QK(bi)AELDKK_;_QK(bi)AELDKK_;_QK(bi)AELDKK_;_QK(bi)AELDKK_;_QK(bi)AELDKK_;_QK(bi)AELDKK_;_QK(bi)AE…	0.000624263	2.79386	3.56242	25.9832	25.6261	26.0018	21.6845	22.8759	22.3634
PF3D7_0201900	Plasmodium falciparum 3D7	erythrocyte membrane protein 3	EMP3	Previous IDs: PF02_0019;PFB0095c	1	0	Biotin (K)	0	1	2	806;828;850;916;938;960	NA	GKEVTNKAHENLEEYNETDLAK	_GKEVTNK(bi)AHENLEEYNETDLAK_;_GKEVTNK(bi)AHENLEEYNETDLAK_;_GKEVTNK(bi)AHENLEEYNETDLAK_;_GKEVTNK(bi)AHENLEEYNETDLAK_;_GKEVTNK(bi)AHENLEEYNETDLAK_;_GKEVTNK(bi)AHENLEEYNETDLAK_;_GKEVTNK(bi)AHENLEEYNETDLAK_;_GKEVTNK(bi)AHENLEEYNETDLAK_;_GKEVTNK(bi)AHENLEEYNETDLAK_;_GKEVTNK(bi)AHENLEEYNETDLAK_;_GKEVTNK(bi)AHENLEEYNETDLAK_	0.000958883	2.65166	3.55169	21.4892	22.5643	22.3037	18.7996	18.8313	18.0712
PF3D7_0532400	Plasmodium falciparum 3D7	lysine-rich membrane-associated PHISTb protein	LyMP	Previous IDs: MAL5P1.315;PFE1605w	1	0	Biotin (K)	0	1	2	414;433	NA	KNPEMLTENQINEEENENTKVGGANTK	_K(bi)NPEM(ox)LTENQINEEENENTKVGGANTK_;_KNPEM(ox)LTENQINEEENENTK(bi)VGGANTK_;_K(bi)NPEM(ox)LTENQINEEENENTKVGGANTK_;_K(bi)NPEM(ox)LTENQINEEENENTKVGGANTK_;_KNPEM(ox)LTENQINEEENENTK(bi)VGGANTK_;_KNPEM(ox)LTENQINEEENENTK(bi)VGGANTK_;_K(bi)NPEM(ox)LTENQINEEENENTKVGGANTK_;_K(bi)NPEM(ox)LTENQINEEENENTKVGGANTK_;_KNPEM(ox)LTENQINEEENENTK(bi)VGGANTK_;_K(bi)NPEM(ox)LTENQINEEENENTKVGGANTK_;_KNPEM(ox)LTENQINEE…	6.94115e-05	3.37618	3.54937	26.5349	26.4037	26.7463	22.647	23.2032	23.1866
PF3D7_0202000	Plasmodium falciparum 3D7	knob-associated histidine-rich protein	KAHRP	Previous IDs: PF02_0020;PFB0100c	1	0	Biotin (K)	0	1	2	545	NA	GATKEASTSKEATK	_GATK(bi)EASTSKEATK_;_GATK(bi)EASTSKEATK_;_GATK(bi)EASTSKEATK_;_GATK(bi)EASTSKEATK_;_GATK(bi)EASTSKEATK_;_GATK(bi)EASTSKEATK_;_GATK(bi)EASTSKEATK_	0.00381665	2.199	3.54653	22.8907	22.0375	23.1057	19.3139	18.207	19.8734
PF3D7_0202400	Plasmodium falciparum 3D7	translation-enhancing factor	PTEF	Previous IDs: PF02_0024;PFB0115w	1	0	Biotin (K)	0	1	1	92;96	NA	TNNFPSTLNEKFPHK	_TNNFPSTLNEK(bi)FPHK_;_TNNFPSTLNEK(bi)FPHK_;_TNNFPSTLNEK(bi)FPHK_;_TNNFPSTLNEKFPHK(bi)_;_TNNFPSTLNEK(bi)FPHK_;_TNNFPSTLNEKFPHK(bi)_;_TNNFPSTLNEK(bi)FPHK_;_TNNFPSTLNEK(bi)FPHK_;_TNNFPSTLNEK(bi)FPHK_;_TNNFPSTLNEK(bi)FPHK_;_TNNFPSTLNEK(bi)FPHK_;_TNNFPSTLNEK(bi)FPHK_	0.00600764	2.03505	3.53851	23.62	22.0851	22.2493	18.3473	19.9171	19.0744
PF3D7_0532300	Plasmodium falciparum 3D7	Plasmodium exported protein (PHISTb), unknown function	N/A	Previous IDs: MAL5P1.314;PFE1600w	1	0	Biotin (K);Oxidation (M)	0	1	3	441;438	NA	EMESKVEKLAENQVEKEFQEVNER	_EM(ox)ESKVEK(bi)LAENQVEKEFQEVNER_;_EM(ox)ESK(bi)VEKLAENQVEKEFQEVNER_;_EM(ox)ESK(bi)VEKLAENQVEKEFQEVNER_;_EM(ox)ESKVEK(bi)LAENQVEKEFQEVNER_;_EM(ox)ESKVEK(bi)LAENQVEKEFQEVNER_;_EM(ox)ESK(bi)VEKLAENQVEKEFQEVNER_;_EM(ox)ESK(bi)VEKLAENQVEKEFQEVNER_;_EM(ox)ESKVEK(bi)LAENQVEKEFQEVNER_;_EM(ox)ESK(bi)VEKLAENQVEKEFQEVNER_;_EM(ox)ESKVEK(bi)LAENQVEKEFQEVNER_;_EM(ox)ESK(bi)VEKLAENQVEKEFQEVNER_;_EM(ox)ESK(bi)…	4.77224e-05	3.47456	3.52819	24.6687	24.9491	24.5845	21.2059	20.9416	21.4703
PF3D7_0201900	Plasmodium falciparum 3D7	erythrocyte membrane protein 3	EMP3	Previous IDs: PF02_0019;PFB0095c	1	0	Biotin (K)	0	1	2	1530;1595	NA	QQNTGLKNTASKGQQNTGLK	_QQNTGLKNTASK(bi)GQQNTGLK_;_QQNTGLKNTASK(bi)GQQNTGLK_;_QQNTGLKNTASK(bi)GQQNTGLK_;_QQNTGLKNTASK(bi)GQQNTGLK_;_QQNTGLKNTASK(bi)GQQNTGLK_;_QQNTGLKNTASK(bi)GQQNTGLK_	6.32921e-05	3.39529	3.52747	21.8821	21.3226	21.9273	18.1934	18.2731	18.0831
PF3D7_1149000	Plasmodium falciparum 3D7	antigen 332, DBL-like protein	Pf332	Previous IDs: PF11_0506;PF11_0507	1	0	Biotin (K)	0	1	2	5692	NA	TLEKNKEYSNLSK	_TLEK(bi)NKEYSNLSK_;_TLEK(bi)NKEYSNLSK_;_TLEK(bi)NKEYSNLSK_;_TLEK(bi)NKEYSNLSK_;_TLEK(bi)NKEYSNLSK_;_TLEK(bi)NKEYSNLSK_;_TLEK(bi)NKEYSNLSK_	3.95088e-05	3.51108	3.52165	22.1075	21.6616	21.7679	18.539	18.1304	18.3026
PF3D7_0500800	Plasmodium falciparum 3D7	mature parasite-infected erythrocyte surface antigen	MESA	Previous IDs: MAL5P1.9;PFE0040c	1	0	Biotin (K)	0	1	3	190	NA	AFRELQFIKLRDR	_AFRELQFIK(bi)LRDR_;_AFRELQFIK(bi)LRDR_;_AFRELQFIK(bi)LRDR_;_AFRELQFIK(bi)LRDR_;_AFRELQFIK(bi)LRDR_;_AFRELQFIK(bi)LRDR_;_AFRELQFIK(bi)LRDR_;_AFRELQFIK(bi)LRDR_;_AFRELQFIK(bi)LRDR_;_AFRELQFIK(bi)LRDR_;_AFRELQFIK(bi)LRDR_;_AFRELQFIK(bi)LRDR_	0.167845	0.734765	3.50291	19.1652	24.598	25.9531	19.3784	20.0141	19.8151
PF3D7_1200700	Plasmodium falciparum 3D7	acyl-CoA synthetase	ACS7	Previous IDs: 2277.t00007;MAL12P1.7;PFL0035c	1	0	Biotin (K)	0	1	1	888	NA	SAEKPIGK	_SAEK(bi)PIGK_;_SAEK(bi)PIGK_;_SAEK(bi)PIGK_;_SAEK(bi)PIGK_;_SAEK(bi)PIGK_;_SAEK(bi)PIGK_;_SAEK(bi)PIGK_	0.00430624	2.1546	3.48816	22.8174	22.478	23.0548	20.1512	19.5303	18.2043
PF3D7_0936300	Plasmodium falciparum 3D7	ring-exported protein 3	REX3	Previous IDs: PFI1755c	1	0	Biotin (K)	0	1	3	129	NA	NKIFNFPIPSAEGTVSKEFKNQPK	_NK(bi)IFNFPIPSAEGTVSKEFKNQPK_;_NK(bi)IFNFPIPSAEGTVSKEFKNQPK_;_NK(bi)IFNFPIPSAEGTVSKEFKNQPK_;_NK(bi)IFNFPIPSAEGTVSKEFKNQPK_;_NK(bi)IFNFPIPSAEGTVSKEFKNQPK_;_NK(bi)IFNFPIPSAEGTVSKEFKNQPK_;_NK(bi)IFNFPIPSAEGTVSKEFKNQPK_;_NK(bi)IFNFPIPSAEGTVSKEFKNQPK_;_NK(bi)IFNFPIPSAEGTVSKEFKNQPK_;_NK(bi)IFNFPIPSAEGTVSKEFKNQPK_	0.00144517	2.52928	3.44756	22.2041	22.4489	22.7559	18.8394	19.8076	18.4191
P35612	Homo sapiens (Human)	Beta-adducin (Erythrocyte adducin subunit beta)	ADD2 ADDB	NA	0	1	Biotin (K)	0	1	3	575	NA	KKLELDGEKETAPEEPGSPAK	_K(bi)KLELDGEKETAPEEPGSPAK_;_K(bi)KLELDGEKETAPEEPGSPAK_;_K(bi)KLELDGEKETAPEEPGSPAK_;_K(bi)KLELDGEKETAPEEPGSPAK_;_K(bi)KLELDGEKETAPEEPGSPAK_;_K(bi)KLELDGEKETAPEEPGSPAK_;_K(bi)KLELDGEKETAPEEPGSPAK_;_K(bi)KLELDGEKETAPEEPGSPAK_;_K(bi)KLELDGEKETAPEEPGSPAK_;_K(bi)KLELDGEKETAPEEPGSPAK_;_K(bi)KLELDGEKETAPEEPGSPAK_;_K(bi)KLELDGEKETAPEEPGSPAK_	0.00253198	2.3434	3.44734	22.6268	20.9794	22.3023	18.6436	18.346	18.5767
PF3D7_0202000	Plasmodium falciparum 3D7	knob-associated histidine-rich protein	KAHRP	Previous IDs: PF02_0020;PFB0100c	1	0	2 Biotin (K)	0	2	3	166;164;161;157	NA	AYEEKYESKHYKLK	_AYEEKYESKHYKLK(bi)_;_AYEEKYESKHYKLK(bi)_;_AYEEKYESKHYKLK(bi)_;_AYEEKYESKHYKLK(bi)_;_AYEEKYESKHYK(bi)LK_;_AYEEKYESKHYK(bi)LK_;_AYEEKYESKHYK(bi)LK_;_AYEEKYESKHYKLK(bi)_;_AYEEKYESKHYK(bi)LK_;_AYEEKYESKHYKLK(bi)_;_AYEEKYESKHYKLK(bi)_;_AYEEKYESKHYKLK(bi)_;_AYEEKYESKHYKLK(bi)_;_AYEEKYESKHYK(bi)LK_;_AYEEKYESKHYKLK(bi)_;_AYEEKYESKHYK(bi)LK_;_AYEEKYESKHYKLK(bi)_;_AYEEKYESKHYKLK(bi)_;_AYEEKYESK(bi)HYK(bi)…	2.07501e-05	3.65903	3.43471	24.2731	24.0931	23.995	20.5945	20.531	20.9315
PF3D7_0702000	Plasmodium falciparum 3D7	Plasmodium exported protein (hyp12), unknown function	N/A	Previous IDs: MAL7P1.6	1	0	Biotin (K)	0	1	2	212	NA	AKHIVYDTAKENR	_AK(bi)HIVYDTAKENR_;_AK(bi)HIVYDTAKENR_;_AK(bi)HIVYDTAKENR_;_AK(bi)HIVYDTAKENR_;_AK(bi)HIVYDTAKENR_;_AK(bi)HIVYDTAKENR_;_AK(bi)HIVYDTAKENR_	0.0185494	1.61694	3.43451	22.4062	22.6893	22.7639	19.3515	20.6354	17.569
PF3D7_0500800	Plasmodium falciparum 3D7	mature parasite-infected erythrocyte surface antigen	MESA	Previous IDs: MAL5P1.9;PFE0040c	1	0	2 Biotin (K)	0	2	2	316;313	NA	IYEETKYNKITSEFR	_IYEETKYNK(bi)ITSEFR_;_IYEETKYNK(bi)ITSEFR_;_IYEETKYNK(bi)ITSEFR_;_IYEETK(bi)YNKITSEFR_;_IYEETKYNK(bi)ITSEFR_;_IYEETKYNK(bi)ITSEFR_;_IYEETKYNK(bi)ITSEFR_;_IYEETK(bi)YNKITSEFR_;_IYEETKYNK(bi)ITSEFR_;_IYEETKYNK(bi)ITSEFR_;_IYEETKYNK(bi)ITSEFR_;_IYEETK(bi)YNKITSEFR_;_IYEETKYNK(bi)ITSEFR_;_IYEETKYNK(bi)ITSEFR_;_IYEETKYNK(bi)ITSEFR_;_IYEETK(bi)YNKITSEFR_;_IYEETKYNK(bi)ITSEFR_;_IYEETKYNK(bi)ITSEFR_;_IY…	0.0045355	2.13522	3.43401	21.9209	22.591	21.9854	18.1137	18.2365	19.845
PF3D7_0202000	Plasmodium falciparum 3D7	knob-associated histidine-rich protein	KAHRP	Previous IDs: PF02_0020;PFB0100c	1	0	Biotin (K);Phospho (STY)	1	1	3	551;545;555	548	GATKEASTSKEATKEASTSK	_GATKEASTSK(bi)EATKEASTSK_;_GATK(bi)EASTSKEATKEASTSK_;_GATKEASTSKEATK(bi)EASTSK_;_GATK(bi)EASTSKEATKEASTSK_;_GATKEASTSKEATK(bi)EASTSK_;_GATKEASTSK(bi)EATKEASTSK_;_GATK(bi)EASTSKEATKEASTSK_;_GATK(bi)EASTSKEATKEASTSK_;_GATKEASTSKEATK(bi)EASTSK_;_GATKEASTSK(bi)EATKEASTSK_;_GATK(bi)EASTSKEATKEASTSK_;_GATK(bi)EASTSKEATKEASTSK_;_GATKEASTSKEATK(bi)EASTSK_;_GATKEASTSK(bi)EATKEASTSK_;_GATKEASTSK(bi)EATKEA…	0.000103198	3.28018	3.42296	22.3966	22.2818	22.8549	19.1919	19.255	18.8176
PF3D7_0201900	Plasmodium falciparum 3D7	erythrocyte membrane protein 3	EMP3	Previous IDs: PF02_0019;PFB0095c	1	0	Biotin (K)	0	1	2	1447;1746;1824;1889;2019;2084;2201;2240;2279;1452;1751;1829;1894;2024;2089;2206;2245;2284	NA	QQNTGLKNAANKGQQNTGLK	_QQNTGLK(bi)NAANKGQQNTGLK_;_QQNTGLK(bi)NAANKGQQNTGLK_;_QQNTGLK(bi)NAANKGQQNTGLK_;_QQNTGLK(bi)NAANKGQQNTGLK_;_QQNTGLKNAANK(bi)GQQNTGLK_;_QQNTGLKNAANK(bi)GQQNTGLK_;_QQNTGLK(bi)NAANKGQQNTGLK_	7.66213e-05	3.35151	3.41696	22.3057	22.4716	22.3892	19.3706	18.7484	18.7967
PF3D7_0202000	Plasmodium falciparum 3D7	knob-associated histidine-rich protein	KAHRP	Previous IDs: PF02_0020;PFB0100c	1	0	Biotin (K);Phospho (STY)	1	1	2	581;585	578	EASTSKGATKEASTTEGATK	_EAS(ph)TSK(bi)GATKEASTTEGATK_;_EAS(ph)TSKGATK(bi)EASTTEGATK_;_EAS(ph)TSKGATK(bi)EASTTEGATK_;_EAS(ph)TSKGATK(bi)EASTTEGATK_;_EAS(ph)TSKGATK(bi)EASTTEGATK_;_EAS(ph)TSKGATK(bi)EASTTEGATK_;_EAS(ph)TSKGATK(bi)EASTTEGATK_;_EAS(ph)TSKGATK(bi)EASTTEGATK_;_EAS(ph)TSKGATK(bi)EASTTEGATK_;_EAS(ph)TSKGATK(bi)EASTTEGATK_;_EAS(ph)TSKGATK(bi)EASTTEGATK_;_EAS(ph)TSKGATK(bi)EASTTEGATK_;_EASTSK(bi)GATK(bi)EASTTEGA…	0.00351991	2.23028	3.41117	22.4374	22.5852	22.7698	18.4882	20.2606	18.81
PF3D7_1149000	Plasmodium falciparum 3D7	antigen 332, DBL-like protein	Pf332	Previous IDs: PF11_0506;PF11_0507	1	0	Biotin (K)	0	1	2	6078	NA	EKNIINQSEKEFSVNEN	_EK(bi)NIINQSEKEFSVNEN_;_EK(bi)NIINQSEKEFSVNEN_;_EK(bi)NIINQSEKEFSVNEN_;_EK(bi)NIINQSEKEFSVNEN_;_EK(bi)NIINQSEKEFSVNEN_;_EK(bi)NIINQSEKEFSVNEN_;_EK(bi)NIINQSEKEFSVNEN_;_EK(bi)NIINQSEKEFSVNEN_;_EK(bi)NIINQSEKEFSVNEN_;_EK(bi)NIINQSEKEFSVNEN_;_EK(bi)NIINQSEKEFSVNEN_;_EK(bi)NIINQSEKEFSVNEN_;_EK(bi)NIINQSEKEFSVNEN_	0.00209988	2.40557	3.39738	22.3419	22.3544	22.798	18.2488	19.2459	19.8074
PF3D7_0202000	Plasmodium falciparum 3D7	knob-associated histidine-rich protein	KAHRP	Previous IDs: PF02_0020;PFB0100c	1	0	Biotin (K)	0	1	2	545;541;551	NA	GQCAAEGATKGATKEASTSK	_GQCAAEGATKGATK(bi)EASTSK_;_GQCAAEGATKGATK(bi)EASTSK_;_GQCAAEGATKGATK(bi)EASTSK_;_GQCAAEGATK(bi)GATKEASTSK_;_GQCAAEGATKGATK(bi)EASTSK_;_GQCAAEGATK(bi)GATKEASTSK_;_GQCAAEGATKGATK(bi)EASTSK_;_GQCAAEGATK(bi)GATKEASTSK_;_GQCAAEGATKGATK(bi)EASTSK_;_GQCAAEGATK(bi)GATKEASTSK_;_GQCAAEGATKGATK(bi)EASTSK_;_GQCAAEGATK(bi)GATKEASTSK_;_GQCAAEGATK(bi)GATKEASTSK_;_GQCAAEGATK(bi)GATKEASTSK_;_GQCAAEGATK(bi)GATK(b…	0.000397362	2.9224	3.38405	22.2884	21.7272	22.6871	18.5816	18.959	19.01
PF3D7_0201900	Plasmodium falciparum 3D7	erythrocyte membrane protein 3	EMP3	Previous IDs: PF02_0019;PFB0095c	1	0	Biotin (K)	0	1	2	1127;1146;1184;1203;1222	NA	ELQNKGSEGLKENAELK	_ELQNK(bi)GSEGLKENAELK_;_ELQNK(bi)GSEGLKENAELK_;_ELQNK(bi)GSEGLKENAELK_;_ELQNK(bi)GSEGLKENAELK_;_ELQNK(bi)GSEGLKENAELK_;_ELQNK(bi)GSEGLKENAELK_	1.9089e-05	3.68081	3.35888	22.2033	22.2876	22.1483	18.7872	18.6587	19.1167
PF3D7_0113000	Plasmodium falciparum 3D7	glutamic acid-rich protein GARP	GARP	Previous IDs: MAL1P3.06;PFA0620c	1	0	Biotin (K);Oxidation (M)	0	1	1	533	NA	MAKIEEAELQK	_M(ox)AK(bi)IEEAELQK_;_M(ox)AK(bi)IEEAELQK_;_M(ox)AK(bi)IEEAELQK_;_M(ox)AK(bi)IEEAELQK_;_M(ox)AK(bi)IEEAELQK_;_M(ox)AK(bi)IEEAELQK_;_M(ox)AK(bi)IEEAELQK_;_M(ox)AK(bi)IEEAELQK_;_M(ox)AK(bi)IEEAELQK_;_M(ox)AK(bi)IEEAELQK_;_M(ox)AK(bi)IEEAELQK_;_M(ox)AK(bi)IEEAELQK_;_M(ox)AK(bi)IEEAELQK_;_M(ox)AK(bi)IEEAELQK_;_M(ox)AK(bi)IEEAELQK_;_M(ox)AK(bi)IEEAELQK_;_M(ox)AK(bi)IEEAELQK_;_M(ox)AK(bi)IEEAELQK_;_M(…	9.98167e-05	3.28578	3.35106	24.6527	24.5808	25.2232	21.611	21.401	21.3915
PF3D7_0201900	Plasmodium falciparum 3D7	erythrocyte membrane protein 3	EMP3	Previous IDs: PF02_0019;PFB0095c	1	0	2 Biotin (K)	0	2	2	1317;1314	NA	NKDLKSIGNMEQQNTGLK	_NKDLK(bi)SIGNM(ox)EQQNTGLK_;_NKDLK(bi)SIGNM(ox)EQQNTGLK_;_NKDLK(bi)SIGNM(ox)EQQNTGLK_;_NKDLK(bi)SIGNM(ox)EQQNTGLK_;_NKDLK(bi)SIGNM(ox)EQQNTGLK_;_NKDLK(bi)SIGNM(ox)EQQNTGLK_;_NKDLK(bi)SIGNMEQQNTGLK_;_NKDLK(bi)SIGNMEQQNTGLK_;_NKDLK(bi)SIGNMEQQNTGLK_;_NKDLK(bi)SIGNMEQQNTGLK_;_NKDLK(bi)SIGNMEQQNTGLK_;_NKDLK(bi)SIGNMEQQNTGLK_;_NK(bi)DLK(bi)SIGNM(ox)EQQNTGLK_;_NK(bi)DLK(bi)SIGNM(ox)EQQNTGLK_;_NK(bi)DL…	0.00183785	2.45179	3.34496	22.205	22.4267	22.4771	18.7554	19.8998	18.4187
PF3D7_0500800	Plasmodium falciparum 3D7	mature parasite-infected erythrocyte surface antigen	MESA	Previous IDs: MAL5P1.9;PFE0040c	1	0	Biotin (K)	0	1	2	1317	NA	QNEEYFDEEYIIQSKEHNTLNTFPNMALNEDFRR	_QNEEYFDEEYIIQSK(bi)EHNTLNTFPNMALNEDFRR_;_QNEEYFDEEYIIQSK(bi)EHNTLNTFPNMALNEDFRR_;_QNEEYFDEEYIIQSK(bi)EHNTLNTFPNMALNEDFRR_;_QNEEYFDEEYIIQSK(bi)EHNTLNTFPNMALNEDFRR_;_QNEEYFDEEYIIQSK(bi)EHNTLNTFPNMALNEDFRR_;_QNEEYFDEEYIIQSK(bi)EHNTLNTFPNMALNEDFRR_;_QNEEYFDEEYIIQSK(bi)EHNTLNTFPNMALNEDFRR_;_QNEEYFDEEYIIQSK(bi)EHNTLNTFPNMALNEDFRR_;_QNEEYFDEEYIIQSK(bi)EHNTLNTFPNMALNEDFRR_;_QNEEYFDEEYIIQSK(bi)EHNTLNTFPN…	0.0299062	1.43152	3.34147	24.0044	23.9402	22.4572	21.8799	19.2329	19.2646
PF3D7_0936800	Plasmodium falciparum 3D7	Plasmodium exported protein (PHISTc), unknown function	N/A	Previous IDs: PFI1780w	1	0	Biotin (K)	0	1	3	376	NA	AKGNNQAKPTKGNK	_AKGNNQAKPTK(bi)GNK_;_AKGNNQAKPTK(bi)GNK_;_AKGNNQAKPTK(bi)GNK_;_AKGNNQAKPTK(bi)GNK_;_AKGNNQAKPTK(bi)GNK_;_AKGNNQAKPTK(bi)GNK_;_AKGNNQAKPTK(bi)GNK_;_AKGNNQAKPTK(bi)GNK_;_AKGNNQAKPTK(bi)GNK_;_AKGNNQAKPTK(bi)GNK_;_AKGNNQAKPTK(bi)GNK_;_AKGNNQAKPTK(bi)GNK_;_AKGNNQAKPTK(bi)GNK_;_AKGNNQAKPTK(bi)GNK_;_AKGNNQAKPTK(bi)GNK_;_AKGNNQAKPTK(bi)GNK_;_AKGNNQAKPTK(bi)GNK_	0.000210823	3.09579	3.33845	21.3968	20.7384	21.3542	17.8247	18.0824	17.5669
PF3D7_0500800	Plasmodium falciparum 3D7	mature parasite-infected erythrocyte surface antigen	MESA	Previous IDs: MAL5P1.9;PFE0040c	1	0	Biotin (K)	0	1	2	1144;1140	NA	VNKEVNKR	_VNKEVNK(bi)R_;_VNK(bi)EVNKR_;_VNK(bi)EVNKR_;_VNK(bi)EVNKR_;_VNK(bi)EVNKR_;_VNK(bi)EVNKR_;_VNK(bi)EVNKR_;_VNKEVNK(bi)R_;_VNKEVNK(bi)R_;_VNKEVNK(bi)R_;_VNKEVNK(bi)R_	0.00219117	2.39131	3.31926	22.5609	22.0356	22.5173	19.5378	18.1669	19.4513
PF3D7_0702000	Plasmodium falciparum 3D7	Plasmodium exported protein (hyp12), unknown function	N/A	Previous IDs: MAL7P1.6	1	0	Biotin (K)	0	1	3	212	NA	AKHIVYDTAKENRR	_AK(bi)HIVYDTAKENRR_;_AK(bi)HIVYDTAKENRR_;_AK(bi)HIVYDTAKENRR_;_AK(bi)HIVYDTAKENRR_;_AK(bi)HIVYDTAKENRR_;_AK(bi)HIVYDTAKENRR_;_AK(bi)HIVYDTAKENRR_;_AK(bi)HIVYDTAKENRR_;_AK(bi)HIVYDTAKENRR_;_AK(bi)HIVYDTAKENRR_;_AK(bi)HIVYDTAKENRR_;_AK(bi)HIVYDTAKENRR_	0.000751043	2.73457	3.30967	22.0857	22.1956	22.5934	18.3531	19.4145	19.1781
PF3D7_0113000	Plasmodium falciparum 3D7	glutamic acid-rich protein GARP	GARP	Previous IDs: MAL1P3.06;PFA0620c	1	0	Biotin (K)	0	1	1	503	NA	VEEKNLSIQEQLIGTIGR	_VEEK(bi)NLSIQEQLIGTIGR_;_VEEK(bi)NLSIQEQLIGTIGR_;_VEEK(bi)NLSIQEQLIGTIGR_;_VEEK(bi)NLSIQEQLIGTIGR_;_VEEK(bi)NLSIQEQLIGTIGR_;_VEEK(bi)NLSIQEQLIGTIGR_;_VEEK(bi)NLSIQEQLIGTIGR_;_VEEK(bi)NLSIQEQLIGTIGR_;_VEEK(bi)NLSIQEQLIGTIGR_;_VEEK(bi)NLSIQEQLIGTIGR_;_VEEK(bi)NLSIQEQLIGTIGR_;_VEEK(bi)NLSIQEQLIGTIGR_;_VEEK(bi)NLSIQEQLIGTIGR_;_VEEK(bi)NLSIQEQLIGTIGR_;_VEEK(bi)NLSIQEQLIGTIGR_;_VEEK(bi)NLSIQEQLIGTIGR_…	0.000368797	2.94625	3.30867	24.6089	25.2277	24.707	21.9831	21.3946	21.2399
PF3D7_0202000	Plasmodium falciparum 3D7	knob-associated histidine-rich protein	KAHRP	Previous IDs: PF02_0020;PFB0100c	1	0	Biotin (K);Phospho (STY)	1	1	3	555;561	548	EASTSKEATKEASTSKEATK	_EASTSKEATK(bi)EASTSKEATK_;_EASTSKEATKEASTSK(bi)EATK_;_EASTSKEATK(bi)EASTSKEATK_;_EASTSKEATK(bi)EASTSKEATK_;_EASTSKEATK(bi)EASTSKEATK_;_EASTSKEATK(bi)EASTSKEATK_;_EASTSKEATK(bi)EASTSKEATK_;_EASTSKEATK(bi)EASTSKEATK_;_EASTSKEATK(bi)EASTSKEATK_;_EASTSKEATK(bi)EASTSKEATK_;_EASTSKEATK(bi)EASTSKEATK_;_EASTSKEATK(bi)EASTSKEATK_;_EASTSKEATK(bi)EASTSKEATK_;_EAS(ph)TSKEATK(bi)EASTSKEATK_;_EAS(ph)TSKEATK(b…	0.000950586	2.65468	3.30424	21.4733	21.8874	22.4832	18.2669	19.0891	18.575
PF3D7_0905400	Plasmodium falciparum 3D7	high molecular weight rhoptry protein 3	RhopH3	Previous IDs: PFI0265c	1	0	Biotin (K);Oxidation (M)	0	1	1	788	NA	YMGPLKEQSK	_YMGPLK(bi)EQSK_;_YMGPLK(bi)EQSK_;_YMGPLK(bi)EQSK_;_YMGPLK(bi)EQSK_;_YMGPLK(bi)EQSK_;_YMGPLK(bi)EQSK_;_YMGPLK(bi)EQSK_;_YMGPLK(bi)EQSK_;_YMGPLK(bi)EQSK_;_YMGPLK(bi)EQSK_;_YMGPLK(bi)EQSK_;_YMGPLK(bi)EQSK_;_YM(ox)GPLK(bi)EQSK_;_YM(ox)GPLK(bi)EQSK_;_YM(ox)GPLK(bi)EQSK_;_YM(ox)GPLK(bi)EQSK_;_YM(ox)GPLK(bi)EQSK_;_YM(ox)GPLK(bi)EQSK_	0.0127164	1.75822	3.29108	21.6638	22.0547	22.5069	20.2156	17.849	18.2875
PF3D7_1476200	Plasmodium falciparum 3D7	Plasmodium exported protein (PHISTb), unknown function	N/A	Previous IDs: PF14_0730;PF14_0731	1	0	Biotin (K)	0	1	2	189;194	NA	NYKNVPTKIDVK	_NYK(bi)NVPTKIDVK_;_NYK(bi)NVPTKIDVK_;_NYK(bi)NVPTKIDVK_;_NYK(bi)NVPTKIDVK_;_NYK(bi)NVPTKIDVK_;_NYK(bi)NVPTKIDVK_;_NYK(bi)NVPTKIDVK_;_NYK(bi)NVPTKIDVK_;_NYK(bi)NVPTK(bi)IDVK_	1.70691e-06	4.04975	3.28013	23.5866	23.6316	23.4381	20.272	20.3556	20.1884
PF3D7_0201900	Plasmodium falciparum 3D7	erythrocyte membrane protein 3	EMP3	Previous IDs: PF02_0019;PFB0095c	1	0	Biotin (K)	0	1	3	1127;1146;1184;1203;1222	NA	NKELQNKGSEGLKENAELK	_NKELQNK(bi)GSEGLKENAELK_;_NKELQNK(bi)GSEGLKENAELK_;_NKELQNK(bi)GSEGLKENAELK_;_NKELQNK(bi)GSEGLKENAELK_;_NKELQNK(bi)GSEGLKENAELK_;_NKELQNK(bi)GSEGLKENAELK_;_NKELQNK(bi)GSEGLKENAELK_;_NKELQNK(bi)GSEGLKENAELK_;_NKELQNK(bi)GSEGLKENAELK_;_NKELQNK(bi)GSEGLKENAELK_;_NKELQNK(bi)GSEGLKENAELK_;_NKELQNK(bi)GSEGLKENAELK_	0.000136541	3.20237	3.26568	22.3171	22.5619	22.0385	18.7796	19.3591	18.9817
PF3D7_0201900	Plasmodium falciparum 3D7	erythrocyte membrane protein 3	EMP3	Previous IDs: PF02_0019;PFB0095c	1	0	Biotin (K)	0	1	3	1141;1179;1198;1217;1139;1177;1196;1215	NA	GSEGLKENAELKNKELQNK	_GSEGLKENAELKNK(bi)ELQNK_;_GSEGLKENAELKNK(bi)ELQNK_;_GSEGLKENAELK(bi)NKELQNK_;_GSEGLKENAELK(bi)NKELQNK_;_GSEGLKENAELK(bi)NKELQNK_;_GSEGLKENAELK(bi)NKELQNK_;_GSEGLKENAELK(bi)NKELQNK_;_GSEGLKENAELK(bi)NKELQNK_;_GSEGLKENAELK(bi)NKELQNK_;_GSEGLKENAELK(bi)NKELQNK_	0.00205605	2.4123	3.24276	23.0732	22.8095	21.8477	19.8514	19.1485	19.0022
PF3D7_0532400	Plasmodium falciparum 3D7	lysine-rich membrane-associated PHISTb protein	LyMP	Previous IDs: MAL5P1.315;PFE1605w	1	0	Biotin (K)	0	1	3	440	NA	VGGANTKVRGENKK	_VGGANTK(bi)VRGENKK_;_VGGANTK(bi)VRGENKK_;_VGGANTK(bi)VRGENKK_;_VGGANTK(bi)VRGENKK_;_VGGANTK(bi)VRGENKK_;_VGGANTK(bi)VRGENKK_;_VGGANTK(bi)VRGENKK_;_VGGANTK(bi)VRGENKK_;_VGGANTK(bi)VRGENKK_;_VGGANTK(bi)VRGENKK_;_VGGANTK(bi)VRGENKK_;_VGGANTK(bi)VRGENKK_	0.000308062	3.0037	3.24193	22.6745	21.9564	22.7904	19.1598	19.1148	19.421
PF3D7_0716300	Plasmodium falciparum 3D7	conserved protein, unknown function	N/A	Previous IDs: MAL7P1.77	1	0	Biotin (K)	0	1	2	52;55	NA	STSSSIFQEELKFDKSLK	_STSSSIFQEELKFDK(bi)SLK_;_STSSSIFQEELKFDKSLK(bi)_;_STSSSIFQEELKFDK(bi)SLK_;_STSSSIFQEELKFDKSLK(bi)_;_STSSSIFQEELKFDK(bi)SLK_	0.000794493	2.71645	3.23309	21.5135	22.4807	21.8448	19.1347	18.5216	18.4834
PF3D7_0202000	Plasmodium falciparum 3D7	knob-associated histidine-rich protein	KAHRP	Previous IDs: PF02_0020;PFB0100c	1	0	Biotin (K)	0	1	1	645	NA	GQAQLQEAGKK	_GQAQLQEAGK(bi)K_;_GQAQLQEAGK(bi)K_;_GQAQLQEAGK(bi)K_;_GQAQLQEAGK(bi)K_;_GQAQLQEAGK(bi)K_;_GQAQLQEAGK(bi)K_	0.0113069	1.80118	3.23021	21.4267	21.4684	21.8829	17.1088	19.5752	18.4034
PF3D7_0532400	Plasmodium falciparum 3D7	lysine-rich membrane-associated PHISTb protein	LyMP	Previous IDs: MAL5P1.315;PFE1605w	1	0	Biotin (K)	0	1	1	260	NA	NVLDKNQYK	_NVLDK(bi)NQYK_;_NVLDK(bi)NQYK_;_NVLDK(bi)NQYK_;_NVLDK(bi)NQYK_;_NVLDK(bi)NQYK_;_NVLDK(bi)NQYK_	4.55639e-05	3.4775	3.22938	21.9109	21.6225	22.1851	18.7591	18.5829	18.6883
PF3D7_0201900	Plasmodium falciparum 3D7	erythrocyte membrane protein 3	EMP3	Previous IDs: PF02_0019;PFB0095c	1	0	Biotin (K);Oxidation (M)	0	1	2	284	NA	RPMMVKMQR	_RPM(ox)MVK(bi)MQR_;_RPMMVK(bi)M(ox)QR_;_RPM(ox)MVK(bi)MQR_;_RPM(ox)MVK(bi)MQR_;_RPMM(ox)VK(bi)MQR_;_RPM(ox)MVK(bi)MQR_;_RPM(ox)MVK(bi)MQR_;_RPM(ox)MVK(bi)MQR_;_RPMMVK(bi)M(ox)QR_;_RPMMVK(bi)M(ox)QR_;_RPMMVK(bi)M(ox)QR_;_RPMMVK(bi)M(ox)QR_;_RPM(ox)MVK(bi)MQR_;_RPMMVK(bi)M(ox)QR_;_RPMMVK(bi)MQR_;_RPMMVK(bi)MQR_;_RPMMVK(bi)MQR_;_RPMMVK(bi)MQR_;_RPMMVK(bi)MQR_;_RPMMVK(bi)MQR_;_RPMM(ox)VK(bi)M(ox)QR_…	0.000361791	2.95174	3.21369	21.6691	21.7507	21.8625	18.1807	19.1002	18.3603
PF3D7_0401800	Plasmodium falciparum 3D7	Plasmodium exported protein (PHISTb), unknown function	PfD80	Previous IDs: MAL4P1.16;PFD0080c	1	0	Biotin (K)	0	1	2	390	NA	LRTKDPNMFNK	_LRTK(bi)DPNMFNK_;_LRTK(bi)DPNMFNK_;_LRTK(bi)DPNMFNK_;_LRTK(bi)DPNMFNK_;_LRTK(bi)DPNMFNK_;_LRTK(bi)DPNMFNK_	0.00170248	2.47686	3.20159	22.6038	22.3691	22.667	20.1803	18.9563	18.8986
PF3D7_0801000	Plasmodium falciparum 3D7	Plasmodium exported protein (PHISTc)	N/A	Previous IDs: PF08_0137	1	0	2 Biotin (K)	0	2	2	165;156;166	NA	KGSLGFDSFKK	_KGSLGFDSFK(bi)K_;_KGSLGFDSFK(bi)K_;_KGSLGFDSFK(bi)K_;_KGSLGFDSFK(bi)K_;_K(bi)GSLGFDSFKK_;_KGSLGFDSFK(bi)K_;_K(bi)GSLGFDSFKK_;_K(bi)GSLGFDSFKK_;_KGSLGFDSFK(bi)K_;_KGSLGFDSFK(bi)K_;_KGSLGFDSFK(bi)K_;_KGSLGFDSFK(bi)K_;_KGSLGFDSFK(bi)K_;_KGSLGFDSFK(bi)K_;_KGSLGFDSFK(bi)K_;_K(bi)GS(ph)LGFDSFKK_;_K(bi)GS(ph)LGFDSFKK_;_KGS(ph)LGFDSFK(bi)K_;_K(bi)GS(ph)LGFDSFKK_;_K(bi)GS(ph)LGFDSFKK_;_KGS(ph)LGFDSFK(bi)…	0.00144064	2.52993	3.19999	21.7626	21.7733	21.8224	17.9992	18.3872	19.372
Q9BR77	Homo sapiens (Human)	Coiled-coil domain-containing protein 77	CCDC77	NA	0	1	2 Phospho (STY);Biotin (K)	2	1	3	64	55;61	LAKLHPSKELLEYYQKK	_LAKLHPS(ph)KELLEY(ph)YQK(bi)K_;_LAKLHPS(ph)KELLEY(ph)YQK(bi)K_;_LAKLHPS(ph)KELLEY(ph)YQK(bi)K_;_LAKLHPS(ph)KELLEY(ph)YQK(bi)K_;_LAKLHPS(ph)KELLEY(ph)YQK(bi)K_;_LAKLHPS(ph)KELLEY(ph)YQK(bi)K_;_LAKLHPS(ph)KELLEY(ph)YQK(bi)K_	0.00235764	2.36724	3.19018	22.6052	22.6202	22.3386	19.2164	18.6057	20.1714
PF3D7_0401800	Plasmodium falciparum 3D7	Plasmodium exported protein (PHISTb), unknown function	PfD80	Previous IDs: MAL4P1.16;PFD0080c	1	0	2 Biotin (K)	0	2	2	374;378	NA	TKTFSKELSK	_TK(bi)TFSK(bi)ELSK_;_TK(bi)TFSK(bi)ELSK_;_TK(bi)TFSK(bi)ELSK_;_TK(bi)TFSK(bi)ELSK_;_TK(bi)TFSK(bi)ELSK_;_TK(bi)TFSK(bi)ELSK_;_TK(bi)TFSK(bi)ELSK_;_TK(bi)TFSK(bi)ELSK_;_TK(bi)TFSK(bi)ELSK_;_TKTFSK(bi)ELSK_;_TK(bi)TFSKELSK_;_TK(bi)TFSKELSK_;_TK(bi)TFSKELSK_;_TK(bi)TFSKELSK_	0.000941891	2.6564	3.18182	22.5261	21.9821	23.1508	19.6212	19.3362	19.156
P02549	Homo sapiens (Human)	Spectrin alpha chain, erythrocytic 1 (Erythroid alpha-spectrin)	SPTA1 SPTA	NA	0	1	Biotin (K)	0	1	3	617	NA	KLADDEDYKDIQNLKSR	_KLADDEDYKDIQNLK(bi)SR_;_KLADDEDYKDIQNLK(bi)SR_;_KLADDEDYKDIQNLK(bi)SR_;_KLADDEDYKDIQNLK(bi)SR_;_KLADDEDYKDIQNLK(bi)SR_;_KLADDEDYKDIQNLK(bi)SR_;_KLADDEDYKDIQNLK(bi)SR_;_KLADDEDYKDIQNLK(bi)SR_	0.00134623	2.55384	3.18136	22.4256	21.2941	21.2596	18.7043	18.3536	18.3773
PF3D7_1301400	Plasmodium falciparum 3D7	Plasmodium exported protein (hyp12), unknown function	HYP12	Previous IDs: PF13_0073	1	0	Biotin (K)	0	1	3	258;259	NA	QIEPDIEKYKKNHVICSIIDFR	_QIEPDIEKYK(bi)KNHVICSIIDFR_;_QIEPDIEKYK(bi)KNHVICSIIDFR_;_QIEPDIEKYKK(bi)NHVICSIIDFR_;_QIEPDIEKYKK(bi)NHVICSIIDFR_;_QIEPDIEKYK(bi)KNHVICSIIDFR_;_QIEPDIEKYKK(bi)NHVICSIIDFR_;_QIEPDIEKYKK(bi)NHVICSIIDFR_;_QIEPDIEKYKK(bi)NHVICSIIDFR_;_QIEPDIEKYKK(bi)NHVICSIIDFR_;_QIEPDIEKYKK(bi)NHVICSIIDFR_	0.000213803	3.09579	3.18098	22.8681	22.7075	22.3571	19.8026	19.1197	19.4675
O43491	Homo sapiens (Human)	Band 4.1-like protein 2 (Erythrocyte membrane protein band 4.1-like 2) (Generally expressed protein 4.1) (4.1G)	EPB41L2	NA	0	1	Biotin (K)	0	1	2	946	NA	TVKGGISETRIEK	_TVK(bi)GGISETRIEK_;_TVK(bi)GGISETRIEK_;_TVK(bi)GGISETRIEK_;_TVK(bi)GGISETRIEK_;_TVK(bi)GGISETRIEK_;_TVK(bi)GGISETRIEK_;_TVK(bi)GGISETRIEK_;_TVK(bi)GGISETRIEK_;_TVK(bi)GGISETRIEK_	1.27764e-07	4.37015	3.17121	22.2877	22.3566	22.4005	19.1383	19.2032	19.1897
P11171	Homo sapiens (Human)	Protein 4.1 (P4.1) (4.1R) (Band 4.1) (EPB4.1) (Erythrocyte membrane protein band 4.1)	EPB41 E41P	NA	0	1	Biotin (K)	0	1	2	808	NA	TVKGGISETRIEK	_TVK(bi)GGISETRIEK_;_TVK(bi)GGISETRIEK_;_TVK(bi)GGISETRIEK_;_TVK(bi)GGISETRIEK_;_TVK(bi)GGISETRIEK_;_TVK(bi)GGISETRIEK_;_TVK(bi)GGISETRIEK_;_TVK(bi)GGISETRIEK_;_TVK(bi)GGISETRIEK_	1.27764e-07	4.37015	3.17121	22.2877	22.3566	22.4005	19.1383	19.2032	19.1897
Q9Y2J2	Homo sapiens (Human)	Band 4.1-like protein 3 (4.1B) (Differentially expressed in adenocarcinoma of the lung protein 1) (DAL-1) (Erythrocyte membrane protein band 4.1-like 3) [Cleaved into: Band 4.1-like protein 3, N-terminally processed]	EPB41L3 DAL1 KIAA0987	NA	0	1	Biotin (K)	0	1	2	1027	NA	TVKGGISETRIEK	_TVK(bi)GGISETRIEK_;_TVK(bi)GGISETRIEK_;_TVK(bi)GGISETRIEK_;_TVK(bi)GGISETRIEK_;_TVK(bi)GGISETRIEK_;_TVK(bi)GGISETRIEK_;_TVK(bi)GGISETRIEK_;_TVK(bi)GGISETRIEK_;_TVK(bi)GGISETRIEK_	1.27764e-07	4.37015	3.17121	22.2877	22.3566	22.4005	19.1383	19.2032	19.1897
PF3D7_1477500	Plasmodium falciparum 3D7	Plasmodium exported protein (PHISTb), unknown function	N/A	Previous IDs: PF14_0746	1	0	Biotin (K)	0	1	2	493	NA	QFVDEIRDKR	_QFVDEIRDK(bi)R_;_QFVDEIRDK(bi)R_;_QFVDEIRDK(bi)R_;_QFVDEIRDK(bi)R_;_QFVDEIRDK(bi)R_;_QFVDEIRDK(bi)R_	0.000625255	2.79386	3.17105	22.3586	21.9316	22.393	19.4706	18.4973	19.2021
PF3D7_0500800	Plasmodium falciparum 3D7	mature parasite-infected erythrocyte surface antigen	MESA	Previous IDs: MAL5P1.9;PFE0040c	1	0	Biotin (K)	0	1	3	1156	NA	NERKDVIEQEIVSEEVNEKDTK	_NERK(bi)DVIEQEIVSEEVNEKDTK_;_NERK(bi)DVIEQEIVSEEVNEKDTK_;_NERK(bi)DVIEQEIVSEEVNEKDTK_;_NERK(bi)DVIEQEIVSEEVNEKDTK_;_NERK(bi)DVIEQEIVSEEVNEKDTK_;_NERK(bi)DVIEQEIVSEEVNEKDTK_;_NERK(bi)DVIEQEIVSEEVNEKDTK_	0.00685906	1.98429	3.15231	22.2124	22.9545	22.4413	18.3251	20.3	19.5263
Q14847	Homo sapiens (Human)	LIM and SH3 domain protein 1 (LASP-1) (Metastatic lymph node gene 50 protein) (MLN 50)	LASP1 MLN50	NA	0	1	Biotin (K)	0	1	1	96	NA	GKGFSVVADTPELQR	_GK(bi)GFSVVADTPELQR_;_GK(bi)GFSVVADTPELQR_;_GK(bi)GFSVVADTPELQR_;_GK(bi)GFSVVADTPELQR_;_GK(bi)GFSVVADTPELQR_;_GK(bi)GFSVVADTPELQR_;_GK(bi)GFSVVADTPELQR_	0.00120598	2.58679	3.15072	21.9077	21.8848	21.8962	18.5546	19.4856	18.1963
PF3D7_1301400	Plasmodium falciparum 3D7	Plasmodium exported protein (hyp12), unknown function	HYP12	Previous IDs: PF13_0073	1	0	Biotin (K)	0	1	2	283	NA	NPKGDFHVLSNEEYENREK	_NPK(bi)GDFHVLSNEEYENREK_;_NPK(bi)GDFHVLSNEEYENREK_;_NPK(bi)GDFHVLSNEEYENREK_;_NPK(bi)GDFHVLSNEEYENREK_;_NPK(bi)GDFHVLSNEEYENREK_;_NPK(bi)GDFHVLSNEEYENREK_;_NPK(bi)GDFHVLSNEEYENREK_;_NPK(bi)GDFHVLSNEEYENREK_;_NPK(bi)GDFHVLSNEEYENREK_;_NPK(bi)GDFHVLSNEEYENREK_;_NPK(bi)GDFHVLSNEEYENREK_;_NPK(bi)GDFHVLSNEEYENREK_;_NPK(bi)GDFHVLSNEEYENREK_;_NPK(bi)GDFHVLSNEEYENREK_;_NPK(bi)GDFHVLSNEEYENREK_;_NPK(bi)G…	0.000129466	3.21494	3.14962	25.7838	25.4673	25.5047	22.2651	22.2231	22.8187
P48426	Homo sapiens (Human)	Phosphatidylinositol 5-phosphate 4-kinase type-2 alpha (EC 2.7.1.149) (1-phosphatidylinositol 5-phosphate 4-kinase 2-alpha) (Diphosphoinositide kinase 2-alpha) (PIP5KIII) (Phosphatidylinositol 5-Phosphate 4-Kinase) (PI5P4Kalpha) (Phosphatidylinositol 5-phosphate 4-kinase type II alpha) (PI(5)P 4-kinase type II alpha) (PIP4KII-alpha) (PtdIns(4)P-5-kinase B isoform) (PtdIns(4)P-5-kinase C isoform) …	PIP4K2A PI5P4KA PIP5K2 PIP5K2A	NA	0	1	Biotin (K)	0	1	1	27	NA	HFVAQKVK	_HFVAQK(bi)VK_;_HFVAQK(bi)VK_;_HFVAQK(bi)VK_;_HFVAQK(bi)VK_;_HFVAQK(bi)VK_;_HFVAQK(bi)VK_;_HFVAQK(bi)VK_;_HFVAQK(bi)VK_;_HFVAQK(bi)VK_;_HFVAQK(bi)VK_;_HFVAQK(bi)VK_;_HFVAQK(bi)VK_	2.31763e-05	3.6445	3.14027	21.9688	22.2419	22.3148	19.2132	18.9833	18.9081
PF3D7_0401800	Plasmodium falciparum 3D7	Plasmodium exported protein (PHISTb), unknown function	PfD80	Previous IDs: MAL4P1.16;PFD0080c	1	0	Biotin (K)	0	1	1	407	NA	IVFQDLSKK	_IVFQDLSK(bi)K_;_IVFQDLSK(bi)K_;_IVFQDLSK(bi)K_;_IVFQDLSK(bi)K_;_IVFQDLSK(bi)K_;_IVFQDLSK(bi)K_	0.00514142	2.08905	3.13339	22.722	21.4896	21.7986	19.4627	19.1029	18.0445
PF3D7_1477500	Plasmodium falciparum 3D7	Plasmodium exported protein (PHISTb), unknown function	N/A	Previous IDs: PF14_0746	1	0	Biotin (K)	0	1	3	484	NA	MLKQFVDEIRDKR	_MLK(bi)QFVDEIRDKR_;_MLK(bi)QFVDEIRDKR_;_MLK(bi)QFVDEIRDKR_;_MLK(bi)QFVDEIRDKR_;_MLK(bi)QFVDEIRDKR_;_MLK(bi)QFVDEIRDKR_;_MLK(bi)QFVDEIRDKR_;_MLK(bi)QFVDEIRDKR_;_MLK(bi)QFVDEIRDKR_;_MLK(bi)QFVDEIRDKR_	0.000613065	2.7957	3.12921	22.9244	22.8522	22.6439	19.679	20.2117	19.1421
PF3D7_0730900	Plasmodium falciparum 3D7	EMP1-trafficking protein	PTP4	Previous IDs: MAL7P1.171	1	0	Biotin (K)	0	1	1	2102	NA	GVNVQSSNTNKHMPR	_GVNVQSSNTNK(bi)HM(ox)PR_;_GVNVQSSNTNK(bi)HM(ox)PR_;_GVNVQSSNTNK(bi)HM(ox)PR_;_GVNVQSSNTNK(bi)HM(ox)PR_;_GVNVQSSNTNK(bi)HM(ox)PR_;_GVNVQSSNTNK(bi)HM(ox)PR_;_GVNVQSSNTNK(bi)HM(ox)PR_;_GVNVQSSNTNK(bi)HM(ox)PR_;_GVNVQSSNTNK(bi)HM(ox)PR_;_GVNVQSSNTNK(bi)HM(ox)PR_;_GVNVQSSNTNK(bi)HM(ox)PR_;_GVNVQSSNTNK(bi)HM(ox)PR_;_GVNVQS(ph)SNTNK(bi)HM(ox)PR_;_GVNVQS(ph)SNTNK(bi)HM(ox)PR_;_GVNVQS(ph)SNTNK(bi)HM(ox)P…	1.91135e-05	3.68081	3.12379	26.495	26.3372	26.5799	23.1535	23.5403	23.3469
PF3D7_1401200	Plasmodium falciparum 3D7	Plasmodium exported protein, unknown function	N/A	Previous IDs: PF14_0014	1	0	Biotin (K)	0	1	2	136	NA	KMPSKYDYLR	_KM(ox)PSK(bi)YDYLR_;_KM(ox)PSK(bi)YDYLR_;_KM(ox)PSK(bi)YDYLR_;_KM(ox)PSK(bi)YDYLR_;_KM(ox)PSK(bi)YDYLR_;_KM(ox)PSK(bi)YDYLR_;_KM(ox)PSK(bi)YDYLR_;_KM(ox)PSK(bi)YDYLR_;_KM(ox)PSK(bi)YDYLR_;_KM(ox)PSK(bi)YDYLR_;_KM(ox)PSK(bi)YDYLR_;_KM(ox)PSK(bi)YDYLR_;_KM(ox)PSK(bi)YDYLR_;_KM(ox)PSK(bi)YDYLR_;_KMPSK(bi)YDYLR_;_KMPSK(bi)YDYLR_;_KMPSK(bi)YDYLR_;_KMPSK(bi)YDYLR_;_KMPSK(bi)YDYLR_;_KMPSK(bi)YDYLR_;_KM…	8.47797e-05	3.32777	3.11725	26.0023	25.7565	26.0848	22.5541	23.1252	22.8126
P35612	Homo sapiens (Human)	Beta-adducin (Erythrocyte adducin subunit beta)	ADD2 ADDB	NA	0	1	Biotin (K)	0	1	2	470	NA	TTWMKADEVEKSSSGMPIR	_TTWMKADEVEK(bi)SSSGMPIR_;_TTWMKADEVEK(bi)SSSGMPIR_;_TTWMKADEVEK(bi)SSSGMPIR_;_TTWMKADEVEK(bi)SSSGMPIR_;_TTWMKADEVEK(bi)SSSGMPIR_;_TTWMKADEVEK(bi)SSSGMPIR_;_TTWMKADEVEK(bi)SSSGMPIR_;_TTWMKADEVEK(bi)SSSGMPIR_;_TTWMKADEVEK(bi)SSSGMPIR_	0.0232234	1.53081	3.11372	22.0871	23.0748	22.5428	18.8789	21.0765	18.4081
PF3D7_0500800	Plasmodium falciparum 3D7	mature parasite-infected erythrocyte surface antigen	MESA	Previous IDs: MAL5P1.9;PFE0040c	1	0	Biotin (K)	0	1	1	1371;1373	NA	ILYNLFLEYNPHMNNKQK	_ILYNLFLEYNPHM(ox)NNK(bi)QK_;_ILYNLFLEYNPHM(ox)NNK(bi)QK_;_ILYNLFLEYNPHM(ox)NNK(bi)QK_;_ILYNLFLEYNPHM(ox)NNKQK(bi)_;_ILYNLFLEYNPHM(ox)NNKQK(bi)_;_ILYNLFLEYNPHM(ox)NNK(bi)QK_;_ILYNLFLEYNPHM(ox)NNK(bi)QK_;_ILYNLFLEYNPHM(ox)NNK(bi)QK_;_ILYNLFLEYNPHM(ox)NNK(bi)QK_;_ILYNLFLEYNPHM(ox)NNK(bi)QK_;_ILYNLFLEYNPHM(ox)NNK(bi)QK_;_ILYNLFLEYNPHM(ox)NNK(bi)QK_;_ILYNLFLEYNPHM(ox)NNK(bi)QK_;_ILYNLFLEYNPHMNNKQK(bi…	0.0023857	2.36463	3.10424	24.4569	24.9668	23.4906	21.4353	21.2006	20.9658
PF3D7_0201900	Plasmodium falciparum 3D7	erythrocyte membrane protein 3	EMP3	Previous IDs: PF02_0019;PFB0095c	1	0	Biotin (K)	0	1	2	1289;1294	NA	NKELLNKDLSNEDMK	_NK(bi)ELLNKDLSNEDMK_;_NK(bi)ELLNKDLSNEDMK_;_NK(bi)ELLNKDLSNEDMK_;_NK(bi)ELLNKDLSNEDMK_;_NK(bi)ELLNKDLSNEDMK_;_NK(bi)ELLNKDLSNEDMK_;_NKELLNK(bi)DLSNEDM(ox)K_;_NKELLNK(bi)DLSNEDM(ox)K_;_NKELLNK(bi)DLSNEDM(ox)K_	7.94854e-06	3.89104	3.09982	22.1764	22.3245	22.0251	19.0964	18.9622	19.1679
PF3D7_0201900	Plasmodium falciparum 3D7	erythrocyte membrane protein 3	EMP3	Previous IDs: PF02_0019;PFB0095c	1	0	Biotin (K)	0	1	2	1309	NA	NKELLNKDIR	_NKELLNK(bi)DIR_;_NKELLNK(bi)DIR_;_NKELLNK(bi)DIR_;_NKELLNK(bi)DIR_;_NKELLNK(bi)DIR_;_NKELLNK(bi)DIR_;_NKELLNK(bi)DIR_;_NKELLNK(bi)DIR_;_NKELLNK(bi)DIR_;_NKELLNK(bi)DIR_;_NKELLNK(bi)DIR_;_NKELLNK(bi)DIR_	3.55771e-05	3.53592	3.09626	22.7443	22.8058	22.5579	19.7789	19.3423	19.698
PF3D7_1401200	Plasmodium falciparum 3D7	Plasmodium exported protein, unknown function	N/A	Previous IDs: PF14_0014	1	0	Biotin (K)	0	1	3	136	NA	KKMPSKYDYLR	_KKMPSK(bi)YDYLR_;_KKMPSK(bi)YDYLR_;_KKMPSK(bi)YDYLR_;_KKMPSK(bi)YDYLR_;_KKMPSK(bi)YDYLR_;_KKMPSK(bi)YDYLR_;_KKMPSK(bi)YDYLR_;_KKMPSK(bi)YDYLR_;_KKMPSK(bi)YDYLR_;_KKMPSK(bi)YDYLR_;_KKMPSK(bi)YDYLR_;_KKMPSK(bi)YDYLR_;_KKMPSK(bi)YDYLR_;_KKMPSK(bi)YDYLR_;_KKMPSK(bi)YDYLR_;_KKMPSK(bi)YDYLR_;_KKMPSK(bi)YDYLR_;_KKMPSK(bi)YDYLR_;_KKMPSK(bi)YDYLR_;_KKMPSK(bi)YDYLR_;_KKMPSK(bi)YDYLR_;_KKMPSK(bi)YDYLR_;_KK…	1.82346e-05	3.69414	3.08322	25.3842	25.4735	25.41	22.3338	22.1233	22.5609
P11171	Homo sapiens (Human)	Protein 4.1 (P4.1) (4.1R) (Band 4.1) (EPB4.1) (Erythrocyte membrane protein band 4.1)	EPB41 E41P	NA	0	1	Biotin (K)	0	1	2	88	NA	LFSSFLKRPK	_LFSSFLK(bi)RPK_;_LFSSFLK(bi)RPK_;_LFSSFLK(bi)RPK_;_LFSSFLK(bi)RPK_;_LFSSFLK(bi)RPK_;_LFSSFLK(bi)RPK_	0.000143599	3.19077	3.07006	21.6113	21.1228	21.3819	18.1266	18.1491	18.63
PF3D7_1149600	Plasmodium falciparum 3D7	DnaJ protein, putative	N/A	Previous IDs: PF11_0513	1	0	Biotin (K)	0	1	2	107	NA	KVNTYDKGLNSLFK	_KVNTYDK(bi)GLNSLFK_;_KVNTYDK(bi)GLNSLFK_;_KVNTYDK(bi)GLNSLFK_;_KVNTYDK(bi)GLNSLFK_;_KVNTYDK(bi)GLNSLFK_;_KVNTYDK(bi)GLNSLFK_;_KVNTYDK(bi)GLNSLFK_	0.00736006	1.96057	3.06828	21.9567	22.0964	22.1913	18.2301	20.2077	18.6018
Q8WW12	Homo sapiens (Human)	PEST proteolytic signal-containing nuclear protein (PCNP) (PEST-containing nuclear protein)	PCNP	NA	0	1	Biotin (K)	0	1	2	70	NA	ISKFGFAIGSQTTKK	_ISK(bi)FGFAIGSQTTKK_;_ISK(bi)FGFAIGSQTTKK_;_ISK(bi)FGFAIGSQTTKK_;_ISK(bi)FGFAIGSQTTKK_;_ISK(bi)FGFAIGSQTTKK_;_ISK(bi)FGFAIGSQTTKK_;_ISK(bi)FGFAIGSQTTKK_	0.00225038	2.3829	3.06517	22.747	22.8816	23.1653	19.0201	20.3192	20.2591
PF3D7_0202000	Plasmodium falciparum 3D7	knob-associated histidine-rich protein	KAHRP	Previous IDs: PF02_0020;PFB0100c	1	0	Biotin (K);Phospho (STY)	1	1	1	595	589;588;604;598	EASTTEGATKGASTTAGSTTGATTGANAVQSK	_EASTTEGATK(bi)GASTTAGSTTGATTGANAVQSK_;_EASTTEGATK(bi)GASTTAGSTTGATTGANAVQSK_;_EASTTEGATK(bi)GASTTAGSTTGATTGANAVQSK_;_EASTTEGATK(bi)GASTTAGSTTGATTGANAVQSK_;_EASTTEGATK(bi)GASTTAGSTTGATTGANAVQSK_;_EASTTEGATK(bi)GASTTAGSTTGATTGANAVQSK_;_EASTTEGATK(bi)GASTTAGSTTGATTGANAVQSK_;_EASTTEGATK(bi)GASTTAGSTTGATTGANAVQSK_;_EASTTEGATK(bi)GASTTAGSTTGATTGANAVQSK_;_EASTTEGATK(bi)GASTTAGSTTGATTGANAVQSK_;_EAST(ph)…	0.00933997	1.87178	3.06491	20.8356	21.4058	22.5823	18.7801	17.7591	19.0898
PF3D7_0201900	Plasmodium falciparum 3D7	erythrocyte membrane protein 3	EMP3	Previous IDs: PF02_0019;PFB0095c	1	0	Biotin (K)	0	1	1	1530;1595	NA	NTASKGQQNTGLK	_NTASK(bi)GQQNTGLK_;_NTASK(bi)GQQNTGLK_;_NTASK(bi)GQQNTGLK_;_NTASK(bi)GQQNTGLK_;_NTASK(bi)GQQNTGLK_;_NTASK(bi)GQQNTGLK_;_NTASK(bi)GQQNTGLK_;_NTASK(bi)GQQNTGLK_;_NTASK(bi)GQQNTGLK_;_NTASK(bi)GQQNTGLK_;_NTASK(bi)GQQNTGLK_;_NTASK(bi)GQQNTGLK_;_NTASK(bi)GQQNTGLK_	0.00233341	2.37113	3.05859	21.7582	21.6794	22.0091	19.5928	18.5352	18.1428
PF3D7_0801000	Plasmodium falciparum 3D7	Plasmodium exported protein (PHISTc)	N/A	Previous IDs: PF08_0137	1	0	Biotin (K)	0	1	2	461	NA	NINNSMKIEKNNK	_NINNSMK(bi)IEKNNK_;_NINNSMK(bi)IEKNNK_;_NINNSMK(bi)IEKNNK_;_NINNSMK(bi)IEKNNK_;_NINNSMK(bi)IEKNNK_;_NINNSMK(bi)IEKNNK_;_NINNSMK(bi)IEKNNK_;_NINNSMK(bi)IEKNNK_;_NINNSMK(bi)IEKNNK_;_NINNSMK(bi)IEKNNK_;_NINNSM(ox)K(bi)IEKNNK_;_NINNSM(ox)K(bi)IEKNNK_;_NINNSM(ox)K(bi)IEKNNK_;_NINNSM(ox)K(bi)IEKNNK_;_NINNSM(ox)K(bi)IEKNNK_;_NINNSM(ox)K(bi)IEKNNK_	0.000740101	2.73935	3.0578	22.167	21.9108	22.3917	19.6648	18.9745	18.6568
PF3D7_0113000	Plasmodium falciparum 3D7	glutamic acid-rich protein GARP	GARP	Previous IDs: MAL1P3.06;PFA0620c	1	0	Biotin (K)	0	1	3	175	NA	KEENSEVMSLYKTGQHKPK	_KEENSEVMSLYK(bi)TGQHKPK_;_KEENSEVMSLYK(bi)TGQHKPK_;_KEENSEVMSLYK(bi)TGQHKPK_;_KEENSEVMSLYK(bi)TGQHKPK_;_KEENSEVMSLYK(bi)TGQHKPK_;_KEENSEVMSLYK(bi)TGQHKPK_;_KEENSEVMSLYK(bi)TGQHKPK_;_KEENSEVMSLYK(bi)TGQHKPK_;_KEENSEVMSLYK(bi)TGQHKPK_;_KEENSEVMSLYK(bi)TGQHKPK_;_KEENSEVMSLYK(bi)TGQHKPK_;_KEENSEVMSLYK(bi)TGQHKPK_;_KEENSEVMSLYK(bi)TGQHKPK_;_KEENSEVMSLYK(bi)TGQHKPK_;_KEENSEVMSLYK(bi)TGQHKPK_;_KEENSEVM…	0.000133831	3.20595	3.04892	26.3314	26.0439	26.3003	22.9815	23.5573	22.99
PF3D7_0500800	Plasmodium falciparum 3D7	mature parasite-infected erythrocyte surface antigen	MESA	Previous IDs: MAL5P1.9;PFE0040c	1	0	Biotin (K)	0	1	2	190	NA	AFRELQFIKLR	_AFRELQFIK(bi)LR_;_AFRELQFIK(bi)LR_;_AFRELQFIK(bi)LR_;_AFRELQFIK(bi)LR_;_AFRELQFIK(bi)LR_;_AFRELQFIK(bi)LR_;_AFRELQFIK(bi)LR_;_AFRELQFIK(bi)LR_;_AFRELQFIK(bi)LR_;_AFRELQFIK(bi)LR_;_AFRELQFIK(bi)LR_;_AFRELQFIK(bi)LR_;_AFRELQFIK(bi)LR_;_AFRELQFIK(bi)LR_;_AFRELQFIK(bi)LR_;_AFRELQFIK(bi)LR_;_AFRELQFIK(bi)LR_;_AFRELQFIK(bi)LR_;_AFRELQFIK(bi)LR_;_AFRELQFIK(bi)LR_;_AFRELQFIK(bi)LR_;_AFRELQFIK(bi)LR_;_AF…	0.00096608	2.65003	3.04306	27.9309	28.0134	27.9155	24.2271	25.1281	25.3754
PF3D7_0500800	Plasmodium falciparum 3D7	mature parasite-infected erythrocyte surface antigen	MESA	Previous IDs: MAL5P1.9;PFE0040c	1	0	Biotin (K)	0	1	2	995	NA	DKVIGQEIIIEEIKK	_DK(bi)VIGQEIIIEEIKK_;_DK(bi)VIGQEIIIEEIKK_;_DK(bi)VIGQEIIIEEIKK_;_DK(bi)VIGQEIIIEEIKK_;_DK(bi)VIGQEIIIEEIKK_;_DK(bi)VIGQEIIIEEIKK_;_DK(bi)VIGQEIIIEEIKK_;_DK(bi)VIGQEIIIEEIKK_;_DK(bi)VIGQEIIIEEIKK_;_DK(bi)VIGQEIIIEEIKK_;_DK(bi)VIGQEIIIEEIKK_	0.00208962	2.40709	3.03505	23.6846	24.5923	23.3241	21.2295	20.5683	20.698
PF3D7_1301400	Plasmodium falciparum 3D7	Plasmodium exported protein (hyp12), unknown function	HYP12	Previous IDs: PF13_0073	1	0	Biotin (K)	0	1	1	200	NA	TFKNLNAAK	_TFK(bi)NLNAAK_;_TFK(bi)NLNAAK_;_TFK(bi)NLNAAK_;_TFK(bi)NLNAAK_;_TFK(bi)NLNAAK_;_TFK(bi)NLNAAK_;_TFK(bi)NLNAAK_;_TFK(bi)NLNAAK_;_TFK(bi)NLNAAK_;_TFK(bi)NLNAAK_;_TFK(bi)NLNAAK_;_TFK(bi)NLNAAK_;_TFK(bi)NLNAAK_;_TFK(bi)NLNAAK_;_TFK(bi)NLNAAK_	8.71464e-05	3.32163	3.03478	24.6364	24.0522	24.5191	21.4815	21.349	21.2729
PF3D7_1016300	Plasmodium falciparum 3D7	GBP130 protein	GBP130	Previous IDs: PF10_0159	1	0	Biotin (K)	0	1	2	354;404;453;503	NA	HLEVFHKILTNTDPNDEVERR	_HLEVFHK(bi)ILTNTDPNDEVERR_;_HLEVFHK(bi)ILTNTDPNDEVERR_;_HLEVFHK(bi)ILTNTDPNDEVERR_;_HLEVFHK(bi)ILTNTDPNDEVERR_;_HLEVFHK(bi)ILTNTDPNDEVERR_;_HLEVFHK(bi)ILTNTDPNDEVERR_;_HLEVFHK(bi)ILTNTDPNDEVERR_;_HLEVFHK(bi)ILTNTDPNDEVERR_;_HLEVFHK(bi)ILTNTDPNDEVERR_;_HLEVFHK(bi)ILTNTDPNDEVERR_;_HLEVFHK(bi)ILTNTDPNDEVERR_;_HLEVFHK(bi)ILTNTDPNDEVERR_;_HLEVFHK(bi)ILTNTDPNDEVERR_;_HLEVFHK(bi)ILTNTDPNDEVERR_;_HLEVFH…	0.00035385	2.9569	3.03272	27.9746	27.5678	27.2751	24.3612	24.4333	24.9247
PF3D7_0202000	Plasmodium falciparum 3D7	knob-associated histidine-rich protein	KAHRP	Previous IDs: PF02_0020;PFB0100c	1	0	Biotin (K)	0	1	1	520	NA	TDKTGASTNAATNK	_TDK(bi)TGASTNAATNK_;_TDK(bi)TGASTNAATNK_;_TDK(bi)TGASTNAATNK_;_TDK(bi)TGASTNAATNK_;_TDK(bi)TGASTNAATNK_;_TDK(bi)TGASTNAATNK_;_TDK(bi)TGASTNAATNK_;_TDK(bi)TGASTNAATNK_;_TDK(bi)TGASTNAATNK_;_TDK(bi)TGASTNAATNK_;_TDK(bi)TGASTNAATNK_;_TDK(bi)TGASTNAATNK_;_TDK(bi)TGASTNAATNK_;_TDK(bi)TGASTNAATNK_	4.80589e-05	3.47378	3.02842	23.3008	23.133	23.2573	20.4551	20.2269	19.9238
PF3D7_0902000	Plasmodium falciparum 3D7	serine/threonine protein kinase, FIKK family	FIKK9.1	Previous IDs: PFI0095c	1	0	Biotin (K)	0	1	1	203	NA	SIICSPKGNSINNTK	_SIICSPK(bi)GNSINNTK_;_SIICSPK(bi)GNSINNTK_;_SIICSPK(bi)GNSINNTK_;_SIICSPK(bi)GNSINNTK_;_SIICSPK(bi)GNSINNTK_;_SIICSPK(bi)GNSINNTK_;_SIICSPK(bi)GNSINNTK_;_SIICSPK(bi)GNSINNTK_;_SIICSPK(bi)GNSINNTK_;_SIICSPK(bi)GNSINNTK_;_SIICSPK(bi)GNSINNTK_;_SIICSPK(bi)GNSINNTK_;_SIICSPK(bi)GNSINNTK_;_SIICSPK(bi)GNSINNTK_;_SIICSPK(bi)GNSINNTK_;_SIICSPK(bi)GNSINNTK_;_SIICSPK(bi)GNSINNTK_;_SIICSPK(bi)GNSINNTK_;_SI…	6.95909e-06	3.89467	3.02128	24.046	23.8381	24.1136	21.0545	21.0074	20.872
PF3D7_1401200	Plasmodium falciparum 3D7	Plasmodium exported protein, unknown function	N/A	Previous IDs: PF14_0014	1	0	Biotin (K);Oxidation (M)	0	1	3	136	NA	KKMPSKYDYLR	_KKMPSK(bi)YDYLR_;_KKMPSK(bi)YDYLR_;_KKMPSK(bi)YDYLR_;_KKMPSK(bi)YDYLR_;_KKMPSK(bi)YDYLR_;_KKMPSK(bi)YDYLR_;_KKMPSK(bi)YDYLR_;_KKMPSK(bi)YDYLR_;_KKMPSK(bi)YDYLR_;_KKMPSK(bi)YDYLR_;_KKMPSK(bi)YDYLR_;_KKMPSK(bi)YDYLR_;_KKMPSK(bi)YDYLR_;_KKMPSK(bi)YDYLR_;_KKMPSK(bi)YDYLR_;_KKMPSK(bi)YDYLR_;_KKMPSK(bi)YDYLR_;_KKMPSK(bi)YDYLR_;_KKMPSK(bi)YDYLR_;_KKMPSK(bi)YDYLR_;_KKMPSK(bi)YDYLR_;_KKMPSK(bi)YDYLR_;_KK…	0.00705911	1.97483	3.01744	22.8037	22.7471	23.3797	20.6679	18.8584	20.3519
PF3D7_0202000	Plasmodium falciparum 3D7	knob-associated histidine-rich protein	KAHRP	Previous IDs: PF02_0020;PFB0100c	1	0	Biotin (K)	0	1	3	541;545;531	NA	TGASTNAATNKGQCAAEGATKGATKEASTSK	_TGASTNAATNKGQCAAEGATK(bi)GATKEASTSK_;_TGASTNAATNKGQCAAEGATK(bi)GATKEASTSK_;_TGASTNAATNKGQCAAEGATKGATK(bi)EASTSK_;_TGASTNAATNKGQCAAEGATK(bi)GATKEASTSK_;_TGASTNAATNKGQCAAEGATK(bi)GATKEASTSK_;_TGASTNAATNKGQCAAEGATKGATK(bi)EASTSK_;_TGASTNAATNKGQCAAEGATK(bi)GATKEASTSK_;_TGASTNAATNKGQCAAEGATKGATK(bi)EASTSK_;_TGASTNAATNKGQCAAEGATK(bi)GATKEASTSK_;_TGASTNAATNKGQCAAEGATK(bi)GATKEASTSK_;_TGASTNAATNKGQCAAEG…	0.00831305	1.9158	3.01003	22.4394	21.5837	21.9166	17.9105	19.8541	19.1449
Q99733	Homo sapiens (Human)	Nucleosome assembly protein 1-like 4 (Nucleosome assembly protein 2) (NAP-2)	NAP1L4 NAP2	NA	0	1	Biotin (K)	0	1	1	140	NA	SKVVVTEK	_SK(bi)VVVTEK_;_SK(bi)VVVTEK_;_SK(bi)VVVTEK_;_SK(bi)VVVTEK_;_SK(bi)VVVTEK_;_SK(bi)VVVTEK_;_SK(bi)VVVTEK_;_SK(bi)VVVTEK_	0.00112768	2.60468	3.00974	21.5281	21.0937	21.9156	18.0355	18.9762	18.4965
PF3D7_0532400	Plasmodium falciparum 3D7	lysine-rich membrane-associated PHISTb protein	LyMP	Previous IDs: MAL5P1.315;PFE1605w	1	0	Biotin (K)	0	1	1	309	NA	KSNPNNEISLR	_K(bi)SNPNNEISLR_;_K(bi)SNPNNEISLR_;_K(bi)SNPNNEISLR_;_K(bi)SNPNNEISLR_;_K(bi)SNPNNEISLR_;_K(bi)SNPNNEISLR_;_K(bi)SNPNNEISLR_;_K(bi)SNPNNEISLR_;_K(bi)SNPNNEISLR_;_K(bi)SNPNNEISLR_;_K(bi)SNPNNEISLR_;_K(bi)SNPNNEISLR_;_K(bi)SNPNNEISLR_;_K(bi)SNPNNEISLR_;_K(bi)SNPNNEISLR_	1.3217e-05	3.77261	3.00779	23.7464	23.5635	23.7666	20.8516	20.6844	20.5172
PF3D7_0202000	Plasmodium falciparum 3D7	knob-associated histidine-rich protein	KAHRP	Previous IDs: PF02_0020;PFB0100c	1	0	2 Biotin (K)	0	2	3	152;164;161	NA	PGGGFKAYEEKYESKHYK	_PGGGFK(bi)AYEEKYESKHYK(bi)_;_PGGGFK(bi)AYEEKYESK(bi)HYK_;_PGGGFK(bi)AYEEKYESKHYK(bi)_;_PGGGFK(bi)AYEEKYESKHYK(bi)_;_PGGGFK(bi)AYEEKYESKHYK(bi)_;_PGGGFK(bi)AYEEKYESKHYK(bi)_;_PGGGFKAYEEKYESKHYK(bi)_;_PGGGFKAYEEKYESK(bi)HYK_;_PGGGFKAYEEKYESK(bi)HYK_	0.00049622	2.85976	3.0024	21.9041	21.8088	21.398	19.0187	18.8676	18.2174
PF3D7_1200700	Plasmodium falciparum 3D7	acyl-CoA synthetase	ACS7	Previous IDs: 2277.t00007;MAL12P1.7;PFL0035c	1	0	Biotin (K)	0	1	3	852	NA	SVLKSENVDVSKEVESPVRK	_SVLK(bi)SENVDVSKEVESPVRK_;_SVLK(bi)SENVDVSKEVESPVRK_;_SVLK(bi)SENVDVSKEVESPVRK_;_SVLK(bi)SENVDVSKEVESPVRK_;_SVLK(bi)SENVDVSKEVESPVRK_;_SVLK(bi)SENVDVSKEVESPVRK_;_SVLK(bi)SENVDVSKEVESPVRK_;_SVLK(bi)SENVDVSKEVESPVRK_;_SVLK(bi)SENVDVSKEVESPVRK_;_SVLK(bi)SENVDVSKEVESPVRK_;_SVLK(bi)SENVDVSKEVESPVRK_;_SVLK(bi)SENVDVSKEVESPVRK_;_SVLK(bi)SENVDVSKEVESPVRK_;_SVLK(bi)SENVDVSKEVESPVRK_;_SVLK(bi)SENVDVSKEVES…	1.69383e-06	4.04975	2.99854	24.1564	24.0687	23.9531	21.0609	20.9979	21.1238
Q04760	Homo sapiens (Human)	Lactoylglutathione lyase (EC 4.4.1.5) (Aldoketomutase) (Glyoxalase I) (Glx I) (Ketone-aldehyde mutase) (Methylglyoxalase) (S-D-lactoylglutathione methylglyoxal lyase)	GLO1	NA	0	1	Biotin (K)	0	1	3	157;159	NA	FVKKPDDGKMK	_FVKKPDDGK(bi)MK_;_FVKKPDDGK(bi)MK_;_FVKKPDDGKMK(bi)_;_FVKKPDDGK(bi)MK_;_FVKKPDDGK(bi)MK_;_FVKKPDDGK(bi)MK_;_FVKKPDDGK(bi)MK_;_FVKKPDDGK(bi)MK_;_FVKKPDDGK(bi)MK_;_FVKKPDDGK(bi)MK_	0.00240927	2.36135	2.9879	21.2914	21.3456	21.5703	18.9509	18.7271	17.5656
PF3D7_1016300	Plasmodium falciparum 3D7	GBP130 protein	GBP130	Previous IDs: PF10_0159	1	0	Biotin (K)	0	1	1	149	NA	KQINIGDTENQK	_K(bi)QINIGDTENQK_;_K(bi)QINIGDTENQK_;_K(bi)QINIGDTENQK_;_K(bi)QINIGDTENQK_;_K(bi)QINIGDTENQK_;_K(bi)QINIGDTENQK_;_K(bi)QINIGDTENQK_;_K(bi)QINIGDTENQK_;_K(bi)QINIGDTENQK_;_K(bi)QINIGDTENQK_;_K(bi)QINIGDTENQK_;_K(bi)QINIGDTENQK_;_K(bi)QINIGDTENQK_;_K(bi)QINIGDTENQK_;_K(bi)QINIGDTENQK_;_K(bi)QINIGDTENQK_;_K(bi)QINIGDTENQK_;_K(bi)QINIGDTENQK_;_K(bi)QINIGDTENQK_;_K(bi)QINIGDTENQK_;_K(bi)QINIGDTENQK_;…	3.12703e-05	3.57302	2.98562	26.4099	26.1581	26.1816	23.4653	23.0548	23.2727
P69905	Homo sapiens (Human)	Hemoglobin subunit alpha (Alpha-globin) (Hemoglobin alpha chain)	HBA1; HBA2	NA	0	1	Biotin (K)	0	1	1	8;12	NA	VLSPADKTNVK	_VLSPADK(bi)TNVK_;_VLSPADK(bi)TNVK_;_VLSPADK(bi)TNVK_;_VLSPADK(bi)TNVK_;_VLSPADK(bi)TNVK_;_VLSPADK(bi)TNVK_;_VLSPADK(bi)TNVK_;_VLSPADK(bi)TNVK_;_VLSPADK(bi)TNVK_;_VLSPADK(bi)TNVK_;_VLSPADK(bi)TNVK_;_VLSPADK(bi)TNVK_;_VLSPADK(bi)TNVK_;_VLSPADK(bi)TNVK_;_VLSPADK(bi)TNVK_;_VLSPADK(bi)TNVK_;_VLSPADK(bi)TNVK_;_VLSPADKTNVK(bi)_;_VLSPADK(bi)TNVK_;_VLSPADK(bi)TNVK_;_VLSPADK(bi)TNVK_;_VLSPADK(bi)TNVK_;_VL…	0.000134492	3.20595	2.97092	27.0983	26.8619	27.171	23.7072	24.2875	24.2238
PF3D7_0401800	Plasmodium falciparum 3D7	Plasmodium exported protein (PHISTb), unknown function	PfD80	Previous IDs: MAL4P1.16;PFD0080c	1	0	Biotin (K)	0	1	1	480;482	NA	ILCYCASKNK	_ILCYCASK(bi)NK_;_ILCYCASKNK(bi)_;_ILCYCASK(bi)NK_;_ILCYCASK(bi)NK_;_ILCYCASKNK(bi)_;_ILCYCASKNK(bi)_;_ILCYCASK(bi)NK_;_ILCYCASKNK(bi)_;_ILCYCASK(bi)NK_;_ILCYCASK(bi)NK_;_ILCYCASK(bi)NK_;_ILCYCASK(bi)NK_;_ILCYCASKNK(bi)_;_ILCYCASK(bi)NK_;_ILCYCASK(bi)NK_;_ILCYCASK(bi)NK_;_ILCYCASK(bi)NK_;_ILCYCASK(bi)NK_;_ILCYCASK(bi)NK_	0.000404167	2.9189	2.95958	25.3971	25.1446	25.5615	22.8841	22.0824	22.258
PF3D7_0202000	Plasmodium falciparum 3D7	knob-associated histidine-rich protein	KAHRP	Previous IDs: PF02_0020;PFB0100c	1	0	Biotin (K);Phospho (STY)	1	1	3	541;545	544	GQCAAEGATKGATKEASTSKEATK	_GQCAAEGATK(bi)GATKEASTSKEATK_;_GQCAAEGATK(bi)GATKEASTSKEATK_;_GQCAAEGATK(bi)GATKEASTSKEATK_;_GQCAAEGATK(bi)GATKEASTSKEATK_;_GQCAAEGATK(bi)GAT(ph)KEASTSKEATK_;_GQCAAEGATKGAT(ph)K(bi)EASTSKEATK_;_GQCAAEGATK(bi)GAT(ph)KEASTSKEATK_;_GQCAAEGATK(bi)GAT(ph)KEASTSKEATK_;_GQCAAEGATK(bi)GAT(ph)KEASTSKEATK_;_GQCAAEGATK(bi)GAT(ph)KEASTSKEATK_;_GQCAAEGATK(bi)GATK(bi)EASTSKEATK_;_GQCAAEGATK(bi)GATK(bi)EASTSKE…	0.00264487	2.32836	2.95574	21.8268	22.3351	22.4139	18.4646	19.4137	19.8303
PF3D7_1200700	Plasmodium falciparum 3D7	acyl-CoA synthetase	ACS7	Previous IDs: 2277.t00007;MAL12P1.7;PFL0035c	1	0	Biotin (K)	0	1	3	852;848	NA	KSVLKSENVDVSKEVESPVR	_KSVLK(bi)SENVDVSKEVESPVR_;_KSVLK(bi)SENVDVSKEVESPVR_;_KSVLK(bi)SENVDVSKEVESPVR_;_KSVLK(bi)SENVDVSKEVESPVR_;_KSVLK(bi)SENVDVSKEVESPVR_;_K(bi)SVLKSENVDVSKEVESPVR_;_K(bi)SVLKSENVDVSKEVESPVR_;_KSVLK(bi)SENVDVSKEVESPVR_;_KSVLK(bi)SENVDVSKEVESPVR_;_KSVLK(bi)SENVDVSKEVESPVR_;_KSVLK(bi)SENVDVSKEVESPVR_;_KSVLK(bi)SENVDVSKEVESPVR_;_KSVLK(bi)SENVDVSKEVESPVR_;_KSVLK(bi)SENVDVSKEVESPVR_;_KSVLK(bi)SENVDVSKEVE…	0.000597332	2.80377	2.95261	22.479	22.4094	21.5617	19.1634	19.305	19.1239
PF3D7_0500800	Plasmodium falciparum 3D7	mature parasite-infected erythrocyte surface antigen	MESA	Previous IDs: MAL5P1.9;PFE0040c	1	0	Biotin (K)	0	1	3	885	NA	NNKNERKDNVIGK	_NNKNERK(bi)DNVIGK_;_NNKNERK(bi)DNVIGK_;_NNKNERK(bi)DNVIGK_;_NNKNERK(bi)DNVIGK_;_NNKNERK(bi)DNVIGK_;_NNKNERK(bi)DNVIGK_;_NNKNERK(bi)DNVIGK_;_NNKNERK(bi)DNVIGK_;_NNKNERK(bi)DNVIGK_;_NNKNERK(bi)DNVIGK_;_NNKNERK(bi)DNVIGK_;_NNKNERK(bi)DNVIGK_	0.00508822	2.09305	2.93624	20.8182	20.4853	21.6821	18.5303	18.3573	17.2892
P35612	Homo sapiens (Human)	Beta-adducin (Erythrocyte adducin subunit beta)	ADD2 ADDB	NA	0	1	Biotin (K)	0	1	3	511	NA	IREQNRQDVKSAGPQSQLLASVIAEK	_IREQNRQDVK(bi)SAGPQSQLLASVIAEK_;_IREQNRQDVK(bi)SAGPQSQLLASVIAEK_;_IREQNRQDVK(bi)SAGPQSQLLASVIAEK_;_IREQNRQDVK(bi)SAGPQSQLLASVIAEK_;_IREQNRQDVK(bi)SAGPQSQLLASVIAEK_;_IREQNRQDVK(bi)SAGPQSQLLASVIAEK_	0.00130837	2.55979	2.93499	22.203	22.3991	21.5875	18.9648	19.6593	18.7605
PF3D7_0729900	Plasmodium falciparum 3D7	dynein heavy chain, putative	N/A	Previous IDs: MAL7P1.162	1	0	3 Phospho (STY);Biotin (K)	3	1	3	1339	1319;1322;1325	LIKDYLPYIQSMVLDFDRKVQNNIK	_LIKDY(ph)LPY(ph)IQS(ph)MVLDFDRKVQNNIK(bi)_;_LIKDY(ph)LPY(ph)IQS(ph)MVLDFDRKVQNNIK(bi)_;_LIKDY(ph)LPY(ph)IQS(ph)MVLDFDRKVQNNIK(bi)_;_LIKDY(ph)LPY(ph)IQS(ph)MVLDFDRKVQNNIK(bi)_;_LIKDY(ph)LPY(ph)IQS(ph)MVLDFDRKVQNNIK(bi)_;_LIKDY(ph)LPY(ph)IQS(ph)MVLDFDRKVQNNIK(bi)_	0.00274583	2.31608	2.93272	20.6146	21.3462	21.6322	18.3469	17.6639	18.784
PF3D7_1334500	Plasmodium falciparum 3D7	MSP7-like protein	MSRP6	Previous IDs: PF13_0192	1	0	Biotin (K)	0	1	3	238;242	NA	KNVPKYDEKLNNEFK	_KNVPK(bi)YDEKLNNEFK_;_KNVPK(bi)YDEKLNNEFK_;_KNVPK(bi)YDEKLNNEFK_;_KNVPK(bi)YDEKLNNEFK_;_KNVPK(bi)YDEKLNNEFK_;_KNVPKYDEK(bi)LNNEFK_;_KNVPK(bi)YDEKLNNEFK_;_KNVPK(bi)YDEKLNNEFK_;_KNVPKYDEK(bi)LNNEFK_;_KNVPK(bi)YDEKLNNEFK_;_KNVPKYDEK(bi)LNNEFK_;_KNVPK(bi)YDEKLNNEFK_;_KNVPK(bi)YDEKLNNEFK_	0.0105397	1.82623	2.92769	22.2241	21.9821	21.0017	17.8547	19.6716	18.8985
PF3D7_0935900	Plasmodium falciparum 3D7	ring-exported protein 1	REX1	Previous IDs: PFI1735c	1	0	Biotin (K)	0	1	2	87	NA	IIGKGNDNEVNFEDKK	_IIGK(bi)GNDNEVNFEDKK_;_IIGK(bi)GNDNEVNFEDKK_;_IIGK(bi)GNDNEVNFEDKK_;_IIGK(bi)GNDNEVNFEDKK_;_IIGK(bi)GNDNEVNFEDKK_;_IIGK(bi)GNDNEVNFEDKK_	0.0130495	1.74832	2.92292	22.2716	22.4289	22.4781	20.8254	18.6421	18.9424
PF3D7_0730800	Plasmodium falciparum 3D7	Plasmodium exported protein, unknown function	N/A	Previous IDs: MAL7P1.170;PF3D7_0730800.1;PF3D7_0730800.2	1	0	Biotin (K)	0	1	3	137;144;148	NA	GVMHDIKPQMEALKEGIKK	_GVMHDIK(bi)PQMEALKEGIKK_;_GVMHDIKPQMEALK(bi)EGIKK_;_GVMHDIK(bi)PQMEALKEGIKK_;_GVMHDIKPQMEALK(bi)EGIKK_;_GVMHDIKPQMEALKEGIK(bi)K_;_GVMHDIK(bi)PQMEALKEGIKK_;_GVMHDIKPQMEALK(bi)EGIKK_;_GVMHDIKPQMEALK(bi)EGIKK_;_GVMHDIKPQMEALK(bi)EGIKK_;_GVMHDIK(bi)PQMEALKEGIKK_;_GVMHDIK(bi)PQMEALKEGIKK_	0.0152272	1.68789	2.91787	22.809	22.5227	21.1313	19.6915	19.7715	18.2464
PF3D7_1476200	Plasmodium falciparum 3D7	Plasmodium exported protein (PHISTb), unknown function	N/A	Previous IDs: PF14_0730;PF14_0731	1	0	Biotin (K)	0	1	3	210;205;199	NA	KPNNTNKVCDNKNSHIK	_KPNNTNKVCDNK(bi)NSHIK_;_KPNNTNK(bi)VCDNKNSHIK_;_KPNNTNKVCDNK(bi)NSHIK_;_KPNNTNKVCDNK(bi)NSHIK_;_KPNNTNKVCDNK(bi)NSHIK_;_K(bi)PNNTNKVCDNKNSHIK_;_KPNNTNK(bi)VCDNKNSHIK_;_KPNNTNK(bi)VCDNKNSHIK_;_KPNNTNKVCDNK(bi)NSHIK_;_KPNNTNK(bi)VCDNKNSHIK_;_KPNNTNKVCDNK(bi)NSHIK_;_KPNNTNKVCDNK(bi)NSHIK_;_K(bi)PNNTNKVCDNKNSHIK_;_KPNNTNK(bi)VCDNKNSHIK_;_KPNNTNKVCDNK(bi)NSHIK_;_KPNNTNKVCDNK(bi)NSHIK_;_KPNNTNKVCDNK(b…	0.0054334	2.07066	2.91763	21.7779	21.9069	22.3077	18.1223	19.8577	19.2597
PF3D7_1016400	Plasmodium falciparum 3D7	serine/threonine protein kinase, FIKK family	FIKK10.1	Previous IDs: PF10_0160	1	0	Biotin (K)	0	1	1	239	NA	YSDWKLTSIPTHGYNK	_YSDWK(bi)LTSIPTHGYNK_;_YSDWK(bi)LTSIPTHGYNK_;_YSDWK(bi)LTSIPTHGYNK_;_YSDWK(bi)LTSIPTHGYNK_;_YSDWK(bi)LTSIPTHGYNK_;_YSDWK(bi)LTSIPTHGYNK_;_YSDWK(bi)LTSIPTHGYNK_	0.00155546	2.50582	2.91238	21.5809	21.7002	21.7394	19.3629	18.0673	18.8532
PF3D7_0201900	Plasmodium falciparum 3D7	erythrocyte membrane protein 3	EMP3	Previous IDs: PF02_0019;PFB0095c	1	0	Biotin (K)	0	1	3	1070;1089;1108;1082;1101;1120	NA	NKGSDGLKENAELKNK	_NK(bi)GSDGLKENAELKNK_;_NK(bi)GSDGLKENAELKNK_;_NKGSDGLKENAELK(bi)NK_;_NK(bi)GSDGLKENAELKNK_;_NK(bi)GSDGLKENAELKNK_;_NKGSDGLKENAELK(bi)NK_;_NKGSDGLKENAELK(bi)NK_;_NKGSDGLKENAELK(bi)NK_;_NK(bi)GSDGLKENAELKNK_;_NK(bi)GSDGLKENAELKNK_;_NK(bi)GSDGLKENAELKNK_;_NK(bi)GSDGLKENAELKNK_;_NKGSDGLKENAELK(bi)NK_;_NK(bi)GSDGLKENAELKNK_;_NK(bi)GSDGLKENAELKNK_;_NKGSDGLKENAELK(bi)NK_;_NKGSDGLKENAELK(bi)NK_;_NK(bi)G…	0.00526358	2.08211	2.89837	22.1591	22.0433	21.9905	18.2007	19.3003	19.9968
PF3D7_0201900	Plasmodium falciparum 3D7	erythrocyte membrane protein 3	EMP3	Previous IDs: PF02_0019;PFB0095c	1	0	Biotin (K)	0	1	3	485	NA	KLKSTFNPFKR	_K(bi)LKSTFNPFKR_;_K(bi)LKSTFNPFKR_;_K(bi)LKSTFNPFKR_;_K(bi)LKSTFNPFKR_;_K(bi)LKSTFNPFKR_;_K(bi)LKSTFNPFKR_	3.02409e-05	3.57634	2.8878	21.4414	21.1976	21.6251	18.6337	18.428	18.5389
PF3D7_1401200	Plasmodium falciparum 3D7	Plasmodium exported protein, unknown function	N/A	Previous IDs: PF14_0014	1	0	Biotin (K)	0	1	2	60	NA	INSKYDELRTLGASSPQK	_INSK(bi)YDELRTLGASSPQK_;_INSK(bi)YDELRTLGASSPQK_;_INSK(bi)YDELRTLGASSPQK_;_INSK(bi)YDELRTLGASSPQK_;_INSK(bi)YDELRTLGASSPQK_;_INSK(bi)YDELRTLGASSPQK_;_INSK(bi)YDELRTLGASSPQK_	8.46325e-05	3.32777	2.88437	21.7773	21.6329	22.1422	18.8264	19.1429	18.93
PF3D7_0202000	Plasmodium falciparum 3D7	knob-associated histidine-rich protein	KAHRP	Previous IDs: PF02_0020;PFB0100c	1	0	2 Biotin (K)	0	2	2	581;575;585	NA	EATKEASTSKGATK	_EATKEASTSK(bi)GATK_;_EATKEASTSK(bi)GATK_;_EATKEASTSK(bi)GATK_;_EATKEASTSK(bi)GATK_;_EATKEASTSK(bi)GATK_;_EATKEASTSK(bi)GATK_;_EATKEASTSK(bi)GATK_;_EATKEASTSK(bi)GATK_;_EATKEASTSK(bi)GATK_;_EATKEASTSK(bi)GATK_;_EATKEASTSK(bi)GATK_;_EATKEASTSK(bi)GATK_;_EATKEAST(ph)SK(bi)GATK_;_EATKEAS(ph)TSK(bi)GATK_;_EATKEAS(ph)TSK(bi)GATK_;_EATKEAS(ph)TSK(bi)GATK_;_EATKEAS(ph)TSK(bi)GATK_;_EATKEAS(ph)TSK(bi)GAT…	0.00352117	2.23028	2.88152	21.9155	21.273	22.7654	19.3752	19.1676	18.7666
PF3D7_1001200	Plasmodium falciparum 3D7	acyl-CoA binding protein, isoform 2, ACBP2	ACBP2	Previous IDs: PF10_0016	1	0	Biotin (K)	0	1	3	44	NA	QSTVGNCNIKEPSYFQYADKKK	_QSTVGNCNIK(bi)EPSYFQYADKKK_;_QSTVGNCNIK(bi)EPSYFQYADKKK_;_QSTVGNCNIK(bi)EPSYFQYADKKK_;_QSTVGNCNIK(bi)EPSYFQYADKKK_;_QSTVGNCNIK(bi)EPSYFQYADKKK_;_QSTVGNCNIK(bi)EPSYFQYADKKK_	0.000289024	3.01586	2.87127	21.744	21.2907	21.5319	18.2463	18.8918	18.8148
PF3D7_0500800	Plasmodium falciparum 3D7	mature parasite-infected erythrocyte surface antigen	MESA	Previous IDs: MAL5P1.9;PFE0040c	1	0	Biotin (K);Oxidation (M)	0	1	3	1123	NA	MIGKEVIIEEVKEEVKK	_M(ox)IGK(bi)EVIIEEVKEEVKK_;_M(ox)IGK(bi)EVIIEEVKEEVKK_;_M(ox)IGK(bi)EVIIEEVKEEVKK_;_M(ox)IGK(bi)EVIIEEVKEEVKK_;_M(ox)IGK(bi)EVIIEEVKEEVKK_;_M(ox)IGK(bi)EVIIEEVKEEVKK_;_M(ox)IGK(bi)EVIIEEVKEEVKK_;_M(ox)IGK(bi)EVIIEEVKEEVKK_;_M(ox)IGK(bi)EVIIEEVKEEVKK_;_M(ox)IGK(bi)EVIIEEVKEEVKK_;_M(ox)IGK(bi)EVIIEEVKEEVKK_;_M(ox)IGK(bi)EVIIEEVKEEVKK_;_M(ox)IGK(bi)EVIIEEVKEEVKK_;_M(ox)IGK(bi)EVIIEEVKEEVKK_;_M(ox)I…	0.00397852	2.18422	2.86521	24.7813	26.0911	25.3997	22.7903	22.9161	21.97
Q93009	Homo sapiens (Human)	Ubiquitin carboxyl-terminal hydrolase 7 (EC 3.4.19.12) (Deubiquitinating enzyme 7) (Herpesvirus-associated ubiquitin-specific protease) (Ubiquitin thioesterase 7) (Ubiquitin-specific-processing protease 7)	USP7 HAUSP	NA	0	1	Biotin (K)	0	1	1	1096	NA	YTYLEKAIK	_YTYLEK(bi)AIK_;_YTYLEK(bi)AIK_;_YTYLEK(bi)AIK_;_YTYLEK(bi)AIK_;_YTYLEK(bi)AIK_;_YTYLEK(bi)AIK_;_YTYLEK(bi)AIK_	0.00010576	3.27717	2.86519	22.5885	22.246	22.7564	19.5369	19.8869	19.5716
PF3D7_0500800	Plasmodium falciparum 3D7	mature parasite-infected erythrocyte surface antigen	MESA	Previous IDs: MAL5P1.9;PFE0040c	1	0	Biotin (K)	0	1	3	891	NA	KDNVIGKEIMKEDVNEK	_KDNVIGK(bi)EIMKEDVNEK_;_KDNVIGK(bi)EIMKEDVNEK_;_KDNVIGK(bi)EIMKEDVNEK_;_KDNVIGK(bi)EIMKEDVNEK_;_KDNVIGK(bi)EIMKEDVNEK_;_KDNVIGK(bi)EIMKEDVNEK_;_KDNVIGK(bi)EIMKEDVNEK_;_KDNVIGK(bi)EIMKEDVNEK_;_KDNVIGK(bi)EIMKEDVNEK_;_KDNVIGK(bi)EIMKEDVNEK_;_KDNVIGK(bi)EIMKEDVNEK_;_KDNVIGK(bi)EIMKEDVNEK_;_KDNVIGK(bi)EIMKEDVNEK_	7.77594e-05	3.34698	2.86115	22.8818	22.6231	22.4317	19.9728	19.5814	19.799
PF3D7_0201900	Plasmodium falciparum 3D7	erythrocyte membrane protein 3	EMP3	Previous IDs: PF02_0019;PFB0095c	1	0	Biotin (K)	0	1	1	466	NA	KDNELAVSGDCMDSK	_K(bi)DNELAVSGDCMDSK_;_K(bi)DNELAVSGDCMDSK_;_K(bi)DNELAVSGDCMDSK_;_K(bi)DNELAVSGDCMDSK_;_K(bi)DNELAVSGDCMDSK_;_K(bi)DNELAVSGDCMDSK_	0.00184876	2.44984	2.85989	21.03	21.3256	21.1862	17.6435	18.3566	18.9619
PF3D7_0202000	Plasmodium falciparum 3D7	knob-associated histidine-rich protein	KAHRP	Previous IDs: PF02_0020;PFB0100c	1	0	2 Biotin (K)	0	2	3	164;166	NA	HYKLKENVVDGKK	_HYK(bi)LKENVVDGKK_;_HYK(bi)LKENVVDGKK_;_HYK(bi)LKENVVDGKK_;_HYKLK(bi)ENVVDGKK_;_HYK(bi)LKENVVDGKK_;_HYK(bi)LKENVVDGKK_;_HYK(bi)LKENVVDGKK_;_HYKLK(bi)ENVVDGKK_;_HYKLK(bi)ENVVDGKK_;_HYK(bi)LKENVVDGKK_;_HYK(bi)LKENVVDGKK_;_HYK(bi)LKENVVDGKK_;_HYK(bi)LKENVVDGKK_;_HYK(bi)LKENVVDGKK_;_HYK(bi)LKENVVDGKK_;_HYK(bi)LKENVVDGKK_;_HYK(bi)LKENVVDGKK_;_HYK(bi)LKENVVDGKK_;_HYK(bi)LKENVVDGKK_;_HYK(bi)LKENVVDGKK_…	5.68911e-06	3.89467	2.85453	25.9197	25.869	25.8082	23.1679	22.9808	22.8846
PF3D7_0532300	Plasmodium falciparum 3D7	Plasmodium exported protein (PHISTb), unknown function	N/A	Previous IDs: MAL5P1.314;PFE1600w	1	0	Biotin (K)	0	1	3	441;438	NA	EMESKVEKLAENQVEKEFQEVNER	_EM(ox)ESKVEK(bi)LAENQVEKEFQEVNER_;_EM(ox)ESK(bi)VEKLAENQVEKEFQEVNER_;_EM(ox)ESK(bi)VEKLAENQVEKEFQEVNER_;_EM(ox)ESKVEK(bi)LAENQVEKEFQEVNER_;_EM(ox)ESKVEK(bi)LAENQVEKEFQEVNER_;_EM(ox)ESK(bi)VEKLAENQVEKEFQEVNER_;_EM(ox)ESK(bi)VEKLAENQVEKEFQEVNER_;_EM(ox)ESKVEK(bi)LAENQVEKEFQEVNER_;_EM(ox)ESK(bi)VEKLAENQVEKEFQEVNER_;_EM(ox)ESKVEK(bi)LAENQVEKEFQEVNER_;_EM(ox)ESK(bi)VEKLAENQVEKEFQEVNER_;_EM(ox)ESK(bi)…	0.00666013	1.99548	2.83571	26.7911	26.9312	25.4048	23.0705	23.9358	23.6137
O14717	Homo sapiens (Human)	tRNA (cytosine(38)-C(5))-methyltransferase (EC 2.1.1.204) (DNA (cytosine-5)-methyltransferase-like protein 2) (Dnmt2) (DNA methyltransferase homolog HsaIIP) (DNA MTase homolog HsaIIP) (M.HsaIIP) (PuMet)	TRDMT1 DNMT2	NA	0	1	Biotin (K)	0	1	1	111	NA	LQKLPK	_LQK(bi)LPK_;_LQK(bi)LPK_;_LQK(bi)LPK_;_LQK(bi)LPK_;_LQK(bi)LPK_;_LQK(bi)LPK_;_LQK(bi)LPK_;_LQK(bi)LPK_;_LQK(bi)LPK_;_LQK(bi)LPK_;_LQK(bi)LPK_;_LQK(bi)LPK_;_LQK(bi)LPK_;_LQK(bi)LPK_;_LQK(bi)LPK_;_LQK(bi)LPK_;_LQK(bi)LPK_	0.000274306	3.02111	2.83445	26.4242	26.1348	26.3306	23.0256	23.7254	23.6352
PF3D7_0500800	Plasmodium falciparum 3D7	mature parasite-infected erythrocyte surface antigen	MESA	Previous IDs: MAL5P1.9;PFE0040c	1	0	Biotin (K)	0	1	2	1289	NA	KYNNGELEEYYKEK	_K(bi)YNNGELEEYYKEK_;_K(bi)YNNGELEEYYKEK_;_K(bi)YNNGELEEYYKEK_;_K(bi)YNNGELEEYYKEK_;_K(bi)YNNGELEEYYKEK_;_K(bi)YNNGELEEYYKEK_;_K(bi)YNNGELEEYYKEK_	0.00019226	3.11599	2.83435	22.3354	22.1646	22.2347	19.8295	19.1952	19.207
Q8WW12	Homo sapiens (Human)	PEST proteolytic signal-containing nuclear protein (PCNP) (PEST-containing nuclear protein)	PCNP	NA	0	1	Biotin (K)	0	1	1	70	NA	ISKFGFAIGSQTTK	_ISK(bi)FGFAIGSQTTK_;_ISK(bi)FGFAIGSQTTK_;_ISK(bi)FGFAIGSQTTK_;_ISK(bi)FGFAIGSQTTK_;_ISK(bi)FGFAIGSQTTK_;_ISK(bi)FGFAIGSQTTK_;_ISK(bi)FGFAIGSQTTK_;_ISK(bi)FGFAIGSQTTK_;_ISK(bi)FGFAIGSQTTK_;_ISK(bi)FGFAIGSQTTK_;_ISK(bi)FGFAIGSQTTK_	0.00593672	2.03872	2.83101	21.9402	22.4097	22.1272	18.3247	19.647	20.0122
PF3D7_0730800	Plasmodium falciparum 3D7	Plasmodium exported protein, unknown function	N/A	Previous IDs: MAL7P1.170;PF3D7_0730800.1;PF3D7_0730800.2	1	0	Biotin (K);Oxidation (M)	0	1	1	175	NA	NIMKSFGGDFSNTVQGATGIPGK	_NIM(ox)K(bi)SFGGDFSNTVQGATGIPGK_;_NIM(ox)K(bi)SFGGDFSNTVQGATGIPGK_;_NIM(ox)K(bi)SFGGDFSNTVQGATGIPGK_;_NIM(ox)K(bi)SFGGDFSNTVQGATGIPGK_;_NIM(ox)K(bi)SFGGDFSNTVQGATGIPGK_;_NIM(ox)K(bi)SFGGDFSNTVQGATGIPGK_;_NIM(ox)K(bi)SFGGDFSNTVQGATGIPGK_;_NIMK(bi)SFGGDFSNTVQGATGIPGK_;_NIMK(bi)SFGGDFSNTVQGATGIPGK_;_NIMK(bi)SFGGDFSNTVQGATGIPGK_;_NIMK(bi)SFGGDFSNTVQGATGIPGK_;_NIMK(bi)SFGGDFSNTVQGATGIPGK_;_NIMK(bi)SF…	0.00274595	2.31608	2.82567	21.7782	21.7716	21.8544	18.1328	19.5258	19.2686
PF3D7_0114500	Plasmodium falciparum 3D7	Plasmodium exported protein (hyp10), unknown function	N/A	Previous IDs: MAL1P4.16d;PFA0700c	1	0	Biotin (K)	0	1	1	61	NA	THKGENSMAQPIVNK	_THK(bi)GENSM(ox)AQPIVNK_;_THK(bi)GENSM(ox)AQPIVNK_;_THK(bi)GENSM(ox)AQPIVNK_;_THK(bi)GENSM(ox)AQPIVNK_;_THK(bi)GENSM(ox)AQPIVNK_;_THK(bi)GENSM(ox)AQPIVNK_;_THK(bi)GENSM(ox)AQPIVNK_;_THK(bi)GENSM(ox)AQPIVNK_;_THK(bi)GENSMAQPIVNK_;_THK(bi)GENSMAQPIVNK_;_THK(bi)GENSMAQPIVNK_;_THK(bi)GENSMAQPIVNK_;_THK(bi)GENSMAQPIVNK_;_THK(bi)GENSMAQPIVNK_	0.00115442	2.59946	2.81734	21.7196	21.497	21.5195	18.5892	18.2915	19.4033
PF3D7_0201900	Plasmodium falciparum 3D7	erythrocyte membrane protein 3	EMP3	Previous IDs: PF02_0019;PFB0095c	1	0	Biotin (K)	0	1	1	290	NA	GMKDEVDEWIK	_GMK(bi)DEVDEWIK_;_GMK(bi)DEVDEWIK_;_GMK(bi)DEVDEWIK_;_GMK(bi)DEVDEWIK_;_GMK(bi)DEVDEWIK_;_GMK(bi)DEVDEWIK_;_GMK(bi)DEVDEWIK_;_GMK(bi)DEVDEWIK_;_GMK(bi)DEVDEWIK_;_GMK(bi)DEVDEWIK_	0.00132294	2.55756	2.79487	20.8703	21.9014	21.3467	18.5039	18.9241	18.3057
PF3D7_0500800	Plasmodium falciparum 3D7	mature parasite-infected erythrocyte surface antigen	MESA	Previous IDs: MAL5P1.9;PFE0040c	1	0	Biotin (K)	0	1	2	840	NA	VIGQEVIKGDVNEEGPENKDK	_VIGQEVIK(bi)GDVNEEGPENKDK_;_VIGQEVIK(bi)GDVNEEGPENKDK_;_VIGQEVIK(bi)GDVNEEGPENKDK_;_VIGQEVIK(bi)GDVNEEGPENKDK_;_VIGQEVIK(bi)GDVNEEGPENKDK_;_VIGQEVIK(bi)GDVNEEGPENKDK_;_VIGQEVIK(bi)GDVNEEGPENKDK_	0.000271308	3.02187	2.78345	21.9176	21.8926	21.5151	18.6554	19.0041	19.3154
PF3D7_0500800	Plasmodium falciparum 3D7	mature parasite-infected erythrocyte surface antigen	MESA	Previous IDs: MAL5P1.9;PFE0040c	1	0	Biotin (K)	0	1	3	1123	NA	MIGKEVIIEEVKEEVKK	_M(ox)IGK(bi)EVIIEEVKEEVKK_;_M(ox)IGK(bi)EVIIEEVKEEVKK_;_M(ox)IGK(bi)EVIIEEVKEEVKK_;_M(ox)IGK(bi)EVIIEEVKEEVKK_;_M(ox)IGK(bi)EVIIEEVKEEVKK_;_M(ox)IGK(bi)EVIIEEVKEEVKK_;_M(ox)IGK(bi)EVIIEEVKEEVKK_;_M(ox)IGK(bi)EVIIEEVKEEVKK_;_M(ox)IGK(bi)EVIIEEVKEEVKK_;_M(ox)IGK(bi)EVIIEEVKEEVKK_;_M(ox)IGK(bi)EVIIEEVKEEVKK_;_M(ox)IGK(bi)EVIIEEVKEEVKK_;_M(ox)IGK(bi)EVIIEEVKEEVKK_;_M(ox)IGK(bi)EVIIEEVKEEVKK_;_M(ox)I…	0.00549628	2.06617	2.78249	27.1277	27.6107	26.0086	24.484	23.8414	24.0741
PF3D7_0730900	Plasmodium falciparum 3D7	EMP1-trafficking protein	PTP4	Previous IDs: MAL7P1.171	1	0	Biotin (K);Oxidation (M)	0	1	1	2102	NA	GVNVQSSNTNKHMPR	_GVNVQSSNTNK(bi)HM(ox)PR_;_GVNVQSSNTNK(bi)HM(ox)PR_;_GVNVQSSNTNK(bi)HM(ox)PR_;_GVNVQSSNTNK(bi)HM(ox)PR_;_GVNVQSSNTNK(bi)HM(ox)PR_;_GVNVQSSNTNK(bi)HM(ox)PR_;_GVNVQSSNTNK(bi)HM(ox)PR_;_GVNVQSSNTNK(bi)HM(ox)PR_;_GVNVQSSNTNK(bi)HM(ox)PR_;_GVNVQSSNTNK(bi)HM(ox)PR_;_GVNVQSSNTNK(bi)HM(ox)PR_;_GVNVQSSNTNK(bi)HM(ox)PR_;_GVNVQS(ph)SNTNK(bi)HM(ox)PR_;_GVNVQS(ph)SNTNK(bi)HM(ox)PR_;_GVNVQS(ph)SNTNK(bi)HM(ox)P…	0.000215757	3.09579	2.76659	22.8864	22.9548	23.4955	20.149	20.4311	20.4569
PF3D7_0220100	Plasmodium falciparum 3D7	DnaJ protein, putative	N/A	Previous IDs: PF02_0188;PFB0920w	1	0	Biotin (K)	0	1	1	605	NA	NFKNVFSR	_NFK(bi)NVFSR_;_NFK(bi)NVFSR_;_NFK(bi)NVFSR_;_NFK(bi)NVFSR_	0.000288859	3.01586	2.74892	21.5932	21.5858	21.7206	18.7109	19.3353	18.6067
PF3D7_0520800	Plasmodium falciparum 3D7	conserved protein, unknown function	N/A	Previous IDs: MAL5P1.209;PFE1045c	1	0	Biotin (K)	0	1	1	265	NA	ICQPLTKHINEK	_ICQPLTK(bi)HINEK_;_ICQPLTK(bi)HINEK_;_ICQPLTK(bi)HINEK_;_ICQPLTK(bi)HINEK_;_ICQPLTK(bi)HINEK_;_ICQPLTK(bi)HINEK_	0.000271639	3.02187	2.73968	22.2401	22.1565	22.117	19.4439	19.8138	19.0368
P00915	Homo sapiens (Human)	Carbonic anhydrase 1 (EC 4.2.1.1) (Carbonate dehydratase I) (Carbonic anhydrase B) (CAB) (Carbonic anhydrase I) (CA-I)	CA1	NA	0	1	Biotin (K);Oxidation (M)	0	1	2	253	NA	SLLSNVEGDNAVPMQHNNRPTQPLKGR	_SLLSNVEGDNAVPM(ox)QHNNRPTQPLK(bi)GR_;_SLLSNVEGDNAVPM(ox)QHNNRPTQPLK(bi)GR_;_SLLSNVEGDNAVPM(ox)QHNNRPTQPLK(bi)GR_;_SLLSNVEGDNAVPM(ox)QHNNRPTQPLK(bi)GR_;_SLLSNVEGDNAVPM(ox)QHNNRPTQPLK(bi)GR_;_SLLSNVEGDNAVPM(ox)QHNNRPTQPLK(bi)GR_;_SLLSNVEGDNAVPMQHNNRPTQPLK(bi)GR_;_SLLSNVEGDNAVPMQHNNRPTQPLK(bi)GR_;_SLLSNVEGDNAVPMQHNNRPTQPLK(bi)GR_;_SLLSNVEGDNAVPMQHNNRPTQPLK(bi)GR_;_SLLSNVEGDNAVPMQHNNRPTQPLK(bi)GR_;_…	0.00827808	1.91669	2.73164	21.9953	22.1697	22.814	20.3036	19.8605	18.6199
PF3D7_1301400	Plasmodium falciparum 3D7	Plasmodium exported protein (hyp12), unknown function	HYP12	Previous IDs: PF13_0073	1	0	Biotin (K)	0	1	2	346;351	NA	QEQEKVYLEKK	_QEQEK(bi)VYLEKK_;_QEQEK(bi)VYLEKK_;_QEQEKVYLEK(bi)K_;_QEQEK(bi)VYLEKK_;_QEQEK(bi)VYLEKK_;_QEQEK(bi)VYLEKK_	5.24613e-05	3.44907	2.72764	22.1754	22.149	22.1067	19.5081	19.1269	19.6131
PF3D7_0201900	Plasmodium falciparum 3D7	erythrocyte membrane protein 3	EMP3	Previous IDs: PF02_0019;PFB0095c	1	0	Biotin (K)	0	1	3	434;436	NA	LKDSDDKVVVPVNKNK	_LKDSDDKVVVPVNK(bi)NK_;_LKDSDDKVVVPVNK(bi)NK_;_LKDSDDKVVVPVNK(bi)NK_;_LKDSDDKVVVPVNKNK(bi)_;_LKDSDDKVVVPVNKNK(bi)_;_LKDSDDKVVVPVNK(bi)NK_;_LKDSDDKVVVPVNK(bi)NK_;_LKDSDDKVVVPVNK(bi)NK_;_LKDSDDKVVVPVNKNK(bi)_;_LKDSDDKVVVPVNK(bi)NK_;_LKDSDDKVVVPVNKNK(bi)_;_LKDSDDKVVVPVNK(bi)NK_;_LKDSDDKVVVPVNK(bi)NK_;_LKDSDDKVVVPVNK(bi)NK_;_LKDSDDKVVVPVNKNK(bi)_	0.00562371	2.05824	2.72719	22.0292	21.2004	21.6684	18.0295	19.2351	19.4519
PF3D7_0500800	Plasmodium falciparum 3D7	mature parasite-infected erythrocyte surface antigen	MESA	Previous IDs: MAL5P1.9;PFE0040c	1	0	Biotin (K);Oxidation (M)	0	1	1	1371;1373	NA	ILYNLFLEYNPHMNNKQK	_ILYNLFLEYNPHM(ox)NNK(bi)QK_;_ILYNLFLEYNPHM(ox)NNK(bi)QK_;_ILYNLFLEYNPHM(ox)NNK(bi)QK_;_ILYNLFLEYNPHM(ox)NNKQK(bi)_;_ILYNLFLEYNPHM(ox)NNKQK(bi)_;_ILYNLFLEYNPHM(ox)NNK(bi)QK_;_ILYNLFLEYNPHM(ox)NNK(bi)QK_;_ILYNLFLEYNPHM(ox)NNK(bi)QK_;_ILYNLFLEYNPHM(ox)NNK(bi)QK_;_ILYNLFLEYNPHM(ox)NNK(bi)QK_;_ILYNLFLEYNPHM(ox)NNK(bi)QK_;_ILYNLFLEYNPHM(ox)NNK(bi)QK_;_ILYNLFLEYNPHM(ox)NNK(bi)QK_;_ILYNLFLEYNPHMNNKQK(bi…	3.00522e-05	3.57634	2.7259	23.4935	23.8477	23.4449	20.9134	20.8256	20.8695
PF3D7_1149100	Plasmodium falciparum 3D7	Plasmodium exported protein, unknown function	N/A	Previous IDs: PF11_0508;PF3D7_1149100.1;PF3D7_1149100.2	1	0	Biotin (K)	0	1	2	411	NA	NETQEESLNKLSTKNSTNDSIK	_NETQEESLNKLSTK(bi)NSTNDSIK_;_NETQEESLNKLSTK(bi)NSTNDSIK_;_NETQEESLNKLSTK(bi)NSTNDSIK_;_NETQEESLNKLSTK(bi)NSTNDSIK_;_NETQEESLNKLSTK(bi)NSTNDSIK_;_NETQEESLNKLSTK(bi)NSTNDSIK_	0.00140174	2.54116	2.72504	21.737	21.5581	21.8742	18.3317	19.3085	19.354
P11171	Homo sapiens (Human)	Protein 4.1 (P4.1) (4.1R) (Band 4.1) (EPB4.1) (Erythrocyte membrane protein band 4.1)	EPB41 E41P	NA	0	1	Biotin (K)	0	1	1	839;842	NA	IVITGDADIDHDQVLVQAIKEAK	_IVITGDADIDHDQVLVQAIK(bi)EAK_;_IVITGDADIDHDQVLVQAIK(bi)EAK_;_IVITGDADIDHDQVLVQAIK(bi)EAK_;_IVITGDADIDHDQVLVQAIK(bi)EAK_;_IVITGDADIDHDQVLVQAIK(bi)EAK_;_IVITGDADIDHDQVLVQAIK(bi)EAK_;_IVITGDADIDHDQVLVQAIKEAK(bi)_;_IVITGDADIDHDQVLVQAIK(bi)EAK_	0.04286	1.29135	2.72362	22.8777	22.7084	22.0255	21.5028	19.4696	18.4684
PF3D7_1476200	Plasmodium falciparum 3D7	Plasmodium exported protein (PHISTb), unknown function	N/A	Previous IDs: PF14_0730;PF14_0731	1	0	Biotin (K)	0	1	1	189	NA	NYKNVPTK	_NYK(bi)NVPTK_;_NYK(bi)NVPTK_;_NYK(bi)NVPTK_;_NYK(bi)NVPTK_;_NYK(bi)NVPTK_;_NYK(bi)NVPTK_	0.00108376	2.61546	2.71822	21.8397	22.2742	21.8327	18.7073	19.4177	19.6668
PF3D7_0201900	Plasmodium falciparum 3D7	erythrocyte membrane protein 3	EMP3	Previous IDs: PF02_0019;PFB0095c	1	0	Biotin (K)	0	1	2	1343;1473;1335;1465	NA	NTPSKGQQNTGLKNTPNER	_NTPSKGQQNTGLK(bi)NTPNER_;_NTPSK(bi)GQQNTGLKNTPNER_;_NTPSKGQQNTGLK(bi)NTPNER_;_NTPSK(bi)GQQNTGLKNTPNER_;_NTPSKGQQNTGLK(bi)NTPNER_;_NTPSK(bi)GQQNTGLKNTPNER_;_NTPSKGQQNTGLK(bi)NTPNER_;_NTPSK(bi)GQQNTGLKNTPNER_;_NTPSKGQQNTGLK(bi)NTPNER_;_NTPSK(bi)GQQNTGLKNTPNER_;_NTPSKGQQNTGLK(bi)NTPNER_;_NTPSK(bi)GQQNTGLKNTPNER_	0.01092	1.81357	2.71626	21.5876	21.5459	22.0285	18.5399	18.3064	20.1669
PF3D7_0202000	Plasmodium falciparum 3D7	knob-associated histidine-rich protein	KAHRP	Previous IDs: PF02_0020;PFB0100c	1	0	Biotin (K)	0	1	2	512;510	NA	STNAATPGAKDKTQGGK	_STNAATPGAKDK(bi)TQGGK_;_STNAATPGAK(bi)DKTQGGK_;_STNAATPGAKDK(bi)TQGGK_;_STNAATPGAK(bi)DKTQGGK_;_STNAATPGAKDK(bi)TQGGK_;_STNAATPGAKDK(bi)TQGGK_;_STNAATPGAKDK(bi)TQGGK_;_STNAATPGAKDK(bi)TQGGK_;_STNAATPGAKDK(bi)TQGGK_;_STNAATPGAKDK(bi)TQGGK_;_STNAATPGAKDK(bi)TQGGK_	0.00551199	2.06586	2.70863	21.7455	21.7086	22.3042	19.1434	20.0361	18.4529
PF3D7_0202400	Plasmodium falciparum 3D7	translation-enhancing factor	PTEF	Previous IDs: PF02_0024;PFB0115w	1	0	Biotin (K)	0	1	1	329	NA	GGIEKTDTTNIADIK	_GGIEK(bi)TDTTNIADIK_;_GGIEK(bi)TDTTNIADIK_;_GGIEK(bi)TDTTNIADIK_;_GGIEK(bi)TDTTNIADIK_;_GGIEK(bi)TDTTNIADIK_;_GGIEK(bi)TDTTNIADIK_;_GGIEK(bi)TDTTNIADIK_	0.0122413	1.77119	2.7073	23.2304	22.0365	22.1399	20.1206	20.3775	18.7868
P28289	Homo sapiens (Human)	Tropomodulin-1 (Erythrocyte tropomodulin) (E-Tmod)	TMOD1 D9S57E TMOD	NA	0	1	Biotin (K)	0	1	2	354	NA	RLADLTGPIIPKCR	_RLADLTGPIIPK(bi)CR_;_RLADLTGPIIPK(bi)CR_;_RLADLTGPIIPK(bi)CR_;_RLADLTGPIIPK(bi)CR_;_RLADLTGPIIPK(bi)CR_	0.00213124	2.40034	2.70364	22.0795	21.6689	21.7828	19.2223	18.4738	19.7242
PF3D7_1301400	Plasmodium falciparum 3D7	Plasmodium exported protein (hyp12), unknown function	HYP12	Previous IDs: PF13_0073	1	0	Biotin (K);Oxidation (M)	0	1	1	174	NA	SKNMNIPK	_SK(bi)NMNIPK_;_SK(bi)NMNIPK_;_SK(bi)NMNIPK_;_SK(bi)NMNIPK_;_SK(bi)NMNIPK_;_SK(bi)NMNIPK_;_SK(bi)NMNIPK_;_SK(bi)NMNIPK_;_SK(bi)NMNIPK_;_SK(bi)NMNIPK_;_SK(bi)NMNIPK_;_SK(bi)NMNIPK_;_SK(bi)NMNIPK_;_SK(bi)NMNIPK_;_SK(bi)NMNIPK_;_SK(bi)NMNIPK_;_SK(bi)NMNIPK_;_SK(bi)NMNIPK_;_SK(bi)NMNIPK_;_SK(bi)NMNIPK_;_SK(bi)NMNIPK_;_SK(bi)NMNIPK_;_SK(bi)NMNIPK_;_SK(bi)NMNIPK_;_SK(bi)NMNIPK_;_SK(bi)NMNIPK_;_SK(bi)NM…	0.00114634	2.60039	2.70092	22.0144	22.0537	22.6468	19.9446	19.593	19.0746
PF3D7_1016300	Plasmodium falciparum 3D7	GBP130 protein	GBP130	Previous IDs: PF10_0159	1	0	Biotin (K)	0	1	3	124	NA	KDEENKSVVTEEQKVESDSEK	_KDEENK(bi)SVVTEEQKVESDSEK_;_KDEENK(bi)SVVTEEQKVESDSEK_;_KDEENK(bi)SVVTEEQKVESDSEK_;_KDEENK(bi)SVVTEEQKVESDSEK_;_KDEENK(bi)SVVTEEQKVESDSEK_;_KDEENK(bi)SVVTEEQKVESDSEK_	0.00482617	2.111	2.70048	21.1915	22.2094	21.3309	19.5819	18.4389	18.6095
PF3D7_0201900	Plasmodium falciparum 3D7	erythrocyte membrane protein 3	EMP3	Previous IDs: PF02_0019;PFB0095c	1	0	Biotin (K)	0	1	1	2403	NA	HTELNNKNLK	_HTELNNK(bi)NLK_;_HTELNNK(bi)NLK_;_HTELNNK(bi)NLK_;_HTELNNK(bi)NLK_;_HTELNNK(bi)NLK_;_HTELNNK(bi)NLK_	0.0124077	1.768	2.6957	21.0812	21.2113	21.3411	18.8013	19.4156	17.3296
PF3D7_1016300	Plasmodium falciparum 3D7	GBP130 protein	GBP130	Previous IDs: PF10_0159	1	0	Biotin (K)	0	1	1	546;646	NA	KHLEIFHK	_K(bi)HLEIFHK_;_K(bi)HLEIFHK_;_K(bi)HLEIFHK_;_K(bi)HLEIFHK_;_K(bi)HLEIFHK_;_K(bi)HLEIFHK_;_K(bi)HLEIFHK_;_K(bi)HLEIFHK_;_K(bi)HLEIFHK_;_K(bi)HLEIFHK_;_K(bi)HLEIFHK_;_K(bi)HLEIFHK_;_K(bi)HLEIFHK_;_K(bi)HLEIFHK_;_K(bi)HLEIFHK_;_K(bi)HLEIFHK_;_K(bi)HLEIFHK_	0.000392387	2.92494	2.69391	26.9419	26.3692	26.7605	23.8096	23.8274	24.3528
PF3D7_0532400	Plasmodium falciparum 3D7	lysine-rich membrane-associated PHISTb protein	LyMP	Previous IDs: MAL5P1.315;PFE1605w	1	0	Biotin (K)	0	1	3	414;413	NA	IQKIPKKNPEMLTENQINEEENENTK	_IQKIPKK(bi)NPEMLTENQINEEENENTK_;_IQKIPKK(bi)NPEMLTENQINEEENENTK_;_IQKIPKK(bi)NPEMLTENQINEEENENTK_;_IQKIPK(bi)KNPEMLTENQINEEENENTK_;_IQKIPKK(bi)NPEMLTENQINEEENENTK_;_IQKIPKK(bi)NPEMLTENQINEEENENTK_	0.0014677	2.52449	2.69131	21.4591	21.1445	21.8504	19.2877	18.7701	18.3224
PF3D7_1478600	Plasmodium falciparum 3D7	EMP1-trafficking protein	PTP3	Previous IDs: PF14_0758	1	0	Biotin (K)	0	1	3	389	NA	EGKNPFIDNDLSDKKSNMQDNNK	_EGK(bi)NPFIDNDLSDKKSNMQDNNK_;_EGK(bi)NPFIDNDLSDKKSNMQDNNK_;_EGK(bi)NPFIDNDLSDKKSNMQDNNK_;_EGK(bi)NPFIDNDLSDKKSNMQDNNK_;_EGK(bi)NPFIDNDLSDKKSNMQDNNK_;_EGK(bi)NPFIDNDLSDKKSNMQDNNK_	0.0139497	1.72244	2.6844	21.0591	21.1043	20.9829	17.2565	19.4793	18.3574
PF3D7_1001000	Plasmodium falciparum 3D7	Plasmodium exported protein (hyp12), unknown function	PfJ13	Previous IDs: PF10_0013	1	0	Biotin (K)	0	1	3	66	NA	SIKNCKCVNKR	_SIKNCK(bi)CVNKR_;_SIKNCK(bi)CVNKR_;_SIKNCK(bi)CVNKR_;_SIKNCK(bi)CVNKR_;_SIKNCK(bi)CVNKR_;_SIKNCK(bi)CVNKR_;_SIKNCK(bi)CVNKR_;_SIKNCK(bi)CVNKR_;_SIKNCK(bi)CVNKR_;_SIKNCK(bi)CVNKR_;_SIKNCK(bi)CVNKR_;_SIKNCK(bi)CVNKR_;_SIKNCK(bi)CVNKR_;_SIKNCK(bi)CVNKR_;_SIKNCK(bi)CVNKR_;_SIKNCK(bi)CVNKR_;_SIKNCK(bi)CVNKR_;_SIKNCK(bi)CVNKR_;_SIKNCK(bi)CVNKR_;_SIKNCK(bi)CVNKR_;_SIKNCK(bi)CVNKR_;_SIKNCK(bi)CVNKR_	0.000282724	3.01858	2.67979	22.4018	22.0145	22.7916	19.7228	19.7041	19.7416
PF3D7_0721100	Plasmodium falciparum 3D7	conserved protein, unknown function	N/A	Previous IDs: PF07_0087	1	0	Biotin (K)	0	1	1	199	NA	SLKDYNSTQK	_SLK(bi)DYNSTQK_;_SLK(bi)DYNSTQK_;_SLK(bi)DYNSTQK_;_SLK(bi)DYNSTQK_	0.00231824	2.37219	2.67446	21.5739	21.3313	21.8366	18.1876	19.2735	19.2574
PF3D7_0936800	Plasmodium falciparum 3D7	Plasmodium exported protein (PHISTc), unknown function	N/A	Previous IDs: PFI1780w	1	0	Biotin (K)	0	1	2	327;322	NA	VQPPKSQQQKVQPPK	_VQPPKSQQQKVQPPK(bi)_;_VQPPKSQQQKVQPPK(bi)_;_VQPPKSQQQK(bi)VQPPK_;_VQPPKSQQQKVQPPK(bi)_;_VQPPKSQQQKVQPPK(bi)_;_VQPPKSQQQKVQPPK(bi)_;_VQPPKSQQQK(bi)VQPPK_;_VQPPKSQQQKVQPPK(bi)_;_VQPPKSQQQK(bi)VQPPK_;_VQPPKSQQQK(bi)VQPPK_;_VQPPKSQQQK(bi)VQPPK_;_VQPPKSQQQK(bi)VQPPK_	0.00174844	2.46955	2.67354	22.0831	21.8229	22.2665	18.7166	19.7831	19.6522
PF3D7_0936800	Plasmodium falciparum 3D7	Plasmodium exported protein (PHISTc), unknown function	N/A	Previous IDs: PFI1780w	1	0	Biotin (K)	0	1	2	360;365	NA	LQNQKGQKQVSPK	_LQNQKGQK(bi)QVSPK_;_LQNQKGQKQVSPK(bi)_;_LQNQKGQK(bi)QVSPK_;_LQNQKGQK(bi)QVSPK_;_LQNQKGQK(bi)QVSPK_;_LQNQKGQK(bi)QVSPK_;_LQNQKGQK(bi)QVSPK_	0.00412744	2.17038	2.67032	21.825	21.3083	22.4005	18.7048	19.7971	19.021
PF3D7_1200700	Plasmodium falciparum 3D7	acyl-CoA synthetase	ACS7	Previous IDs: 2277.t00007;MAL12P1.7;PFL0035c	1	0	Biotin (K)	0	1	2	852;860	NA	SVLKSENVDVSKEVESPVR	_SVLK(bi)SENVDVSKEVESPVR_;_SVLK(bi)SENVDVSKEVESPVR_;_SVLK(bi)SENVDVSKEVESPVR_;_SVLKSENVDVSK(bi)EVESPVR_;_SVLK(bi)SENVDVSKEVESPVR_;_SVLK(bi)SENVDVSKEVESPVR_;_SVLK(bi)SENVDVSKEVESPVR_;_SVLK(bi)SENVDVSKEVESPVR_;_SVLK(bi)SENVDVSKEVESPVR_;_SVLK(bi)SENVDVSKEVESPVR_;_SVLK(bi)SENVDVSKEVESPVR_;_SVLK(bi)SENVDVSKEVESPVR_;_SVLK(bi)SENVDVSKEVESPVR_;_SVLK(bi)SENVDVSKEVESPVR_;_SVLK(bi)SENVDVSKEVESPVR_;_SVLK(bi)…	5.29972e-06	3.89646	2.66528	25.2376	25.125	24.9742	22.4876	22.4639	22.3894
PF3D7_0936800	Plasmodium falciparum 3D7	Plasmodium exported protein (PHISTc), unknown function	N/A	Previous IDs: PFI1780w	1	0	Biotin (K)	0	1	2	297;302	NA	TEHHENVNEDNVEKPKLQQHK	_TEHHENVNEDNVEKPK(bi)LQQHK_;_TEHHENVNEDNVEKPK(bi)LQQHK_;_TEHHENVNEDNVEKPKLQQHK(bi)_;_TEHHENVNEDNVEKPK(bi)LQQHK_;_TEHHENVNEDNVEKPK(bi)LQQHK_;_TEHHENVNEDNVEKPK(bi)LQQHK_;_TEHHENVNEDNVEKPK(bi)LQQHK_;_TEHHENVNEDNVEKPK(bi)LQQHK_;_TEHHENVNEDNVEKPK(bi)LQQHK_;_TEHHENVNEDNVEKPK(bi)LQQHK_;_TEHHENVNEDNVEKPK(bi)LQQHK_;_TEHHENVNEDNVEKPKLQQHK(bi)_;_TEHHENVNEDNVEKPK(bi)LQQHK_;_TEHHENVNEDNVEKPK(bi)LQQHK_;_TEHHEN…	0.00247953	2.3512	2.65639	23.0178	22.9203	23.1945	21.1317	20.1805	19.8512
PF3D7_1149100	Plasmodium falciparum 3D7	Plasmodium exported protein, unknown function	N/A	Previous IDs: PF11_0508;PF3D7_1149100.1;PF3D7_1149100.2	1	0	Biotin (K)	0	1	3	411	NA	NETQEESLNKLSTKNSTNDSIKTPK	_NETQEESLNKLSTK(bi)NSTNDSIKTPK_;_NETQEESLNKLSTK(bi)NSTNDSIKTPK_;_NETQEESLNKLSTK(bi)NSTNDSIKTPK_;_NETQEESLNKLSTK(bi)NSTNDSIKTPK_;_NETQEESLNKLSTK(bi)NSTNDSIKTPK_;_NETQEESLNKLSTK(bi)NSTNDSIKTPK_	0.001201	2.58789	2.64719	22.2021	21.3154	22.1078	19.4127	18.9134	19.3576
PF3D7_0201900	Plasmodium falciparum 3D7	erythrocyte membrane protein 3	EMP3	Previous IDs: PF02_0019;PFB0095c	1	0	Biotin (K)	0	1	3	1158;1234;1160;1236	NA	GSEGLKENAELKNKELR	_GSEGLKENAELK(bi)NKELR_;_GSEGLKENAELK(bi)NKELR_;_GSEGLKENAELKNK(bi)ELR_;_GSEGLKENAELK(bi)NKELR_	1.81039e-05	3.69414	2.63048	21.4066	21.1736	21.3741	18.5371	18.8208	18.705
PF3D7_0202000	Plasmodium falciparum 3D7	knob-associated histidine-rich protein	KAHRP	Previous IDs: PF02_0020;PFB0100c	1	0	Biotin (K)	0	1	3	551;545;555	NA	GATKEASTSKEATKEASTSK	_GATKEASTSK(bi)EATKEASTSK_;_GATK(bi)EASTSKEATKEASTSK_;_GATKEASTSKEATK(bi)EASTSK_;_GATK(bi)EASTSKEATKEASTSK_;_GATKEASTSKEATK(bi)EASTSK_;_GATKEASTSK(bi)EATKEASTSK_;_GATK(bi)EASTSKEATKEASTSK_;_GATK(bi)EASTSKEATKEASTSK_;_GATKEASTSKEATK(bi)EASTSK_;_GATKEASTSK(bi)EATKEASTSK_;_GATK(bi)EASTSKEATKEASTSK_;_GATK(bi)EASTSKEATKEASTSK_;_GATKEASTSKEATK(bi)EASTSK_;_GATKEASTSK(bi)EATKEASTSK_;_GATKEASTSK(bi)EATKEA…	0.0160224	1.66882	2.62558	22.0559	21.7704	22.5672	20.5514	19.5341	18.4312
PF3D7_1478600	Plasmodium falciparum 3D7	EMP1-trafficking protein	PTP3	Previous IDs: PF14_0758	1	0	Biotin (K)	0	1	3	432;548	NA	QIKQGANPFIENDVSDKKDNLQDSNK	_QIK(bi)QGANPFIENDVSDKKDNLQDSNK_;_QIK(bi)QGANPFIENDVSDKKDNLQDSNK_;_QIK(bi)QGANPFIENDVSDKKDNLQDSNK_;_QIK(bi)QGANPFIENDVSDKKDNLQDSNK_;_QIK(bi)QGANPFIENDVSDKKDNLQDSNK_;_QIK(bi)QGANPFIENDVSDKKDNLQDSNK_	0.00462712	2.12706	2.62282	21.3008	21.2395	21.4024	19.5998	18.3111	18.1633
PF3D7_0500800	Plasmodium falciparum 3D7	mature parasite-infected erythrocyte surface antigen	MESA	Previous IDs: MAL5P1.9;PFE0040c	1	0	Biotin (K)	0	1	3	683;674	NA	QVEEGIKENDTESKDKLIGQEIITEEVK	_QVEEGIKENDTESKDK(bi)LIGQEIITEEVK_;_QVEEGIKENDTESKDK(bi)LIGQEIITEEVK_;_QVEEGIKENDTESKDK(bi)LIGQEIITEEVK_;_QVEEGIK(bi)ENDTESKDKLIGQEIITEEVK_;_QVEEGIKENDTESKDK(bi)LIGQEIITEEVK_;_QVEEGIKENDTESKDK(bi)LIGQEIITEEVK_;_QVEEGIKENDTESKDK(bi)LIGQEIITEEVK_;_QVEEGIKENDTESKDK(bi)LIGQEIITEEVK_;_QVEEGIK(bi)ENDTESKDKLIGQEIITEEVK_;_QVEEGIK(bi)ENDTESKDKLIGQEIITEEVK_;_QVEEGIKENDTESKDK(bi)LIGQEIITEEVK_;_QVEEGIK(bi)EN…	0.00628765	2.01705	2.61738	24.4935	24.8333	23.3077	21.916	21.5941	21.2723
PF3D7_0731600	Plasmodium falciparum 3D7	acyl-CoA synthetase	ACS5	Previous IDs: PF07_0129	1	0	Biotin (K)	0	1	1	801;811	NA	AKDMSQELELNK	_AK(bi)DMSQELELNK_;_AKDMSQELELNK(bi)_;_AK(bi)DMSQELELNK_;_AK(bi)DMSQELELNK_;_AK(bi)DMSQELELNK_;_AKDMSQELELNK(bi)_;_AK(bi)DMSQELELNK_;_AKDMSQELELNK(bi)_;_AK(bi)DMSQELELNK_;_AKDMSQELELNK(bi)_;_AK(bi)DMSQELELNK_;_AK(bi)DMSQELELNK_;_AKDMSQELELNK(bi)_;_AK(bi)DMSQELELNK_;_AK(bi)DMSQELELNK_;_AKDMSQELELNK(bi)_;_AK(bi)DMSQELELNK_;_AKDMSQELELNK(bi)_;_AK(bi)DMSQELELNK_;_AK(bi)DMSQELELNK_;_AK(bi)DMSQELELNK_;…	0.000304267	3.0037	2.61544	25.1828	25.0016	25.2919	22.1436	22.8344	22.652
PF3D7_0500800	Plasmodium falciparum 3D7	mature parasite-infected erythrocyte surface antigen	MESA	Previous IDs: MAL5P1.9;PFE0040c	1	0	Biotin (K)	0	1	2	1123	NA	MIGKEVIIEEVKEEVK	_M(ox)IGK(bi)EVIIEEVKEEVK_;_M(ox)IGK(bi)EVIIEEVKEEVK_;_M(ox)IGK(bi)EVIIEEVKEEVK_;_M(ox)IGK(bi)EVIIEEVKEEVK_;_M(ox)IGK(bi)EVIIEEVKEEVK_;_M(ox)IGK(bi)EVIIEEVKEEVK_;_M(ox)IGK(bi)EVIIEEVKEEVK_;_M(ox)IGK(bi)EVIIEEVKEEVK_;_M(ox)IGK(bi)EVIIEEVKEEVK_;_M(ox)IGK(bi)EVIIEEVKEEVK_;_M(ox)IGK(bi)EVIIEEVKEEVK_;_M(ox)IGK(bi)EVIIEEVKEEVK_;_M(ox)IGK(bi)EVIIEEVKEEVK_;_M(ox)IGK(bi)EVIIEEVKEEVK_;_M(ox)IGK(bi)EVIIEEVK…	0.00699732	1.97719	2.61239	27.4083	27.6247	26.0719	24.7231	24.3864	24.1583
PF3D7_0202000	Plasmodium falciparum 3D7	knob-associated histidine-rich protein	KAHRP	Previous IDs: PF02_0020;PFB0100c	1	0	2 Biotin (K);2 Phospho (STY)	2	2	3	354;359;351;364	345;347;348	YSSFSSVNKYGKHGDEKHHSSK	_YSSFSSVNKYGK(bi)HGDEKHHSSK_;_YSSFSSVNKYGK(bi)HGDEKHHSSK_;_YSSFSSVNKYGK(bi)HGDEKHHSSK_;_YSSFSSVNKYGK(bi)HGDEKHHSSK_;_YSSFSSVNKYGK(bi)HGDEKHHSSK_;_YSSFSSVNKYGK(bi)HGDEKHHSSK_;_YSSFSSVNKYGK(bi)HGDEKHHSSK_;_YSSFSSVNKYGK(bi)HGDEKHHSSK_;_YSSFSSVNKYGK(bi)HGDEKHHSSK_;_YSSFSSVNKYGKHGDEK(bi)HHSSK_;_YSSFSSVNKYGK(bi)HGDEKHHSSK_;_YSSFSSVNKYGK(bi)HGDEKHHSSK_;_YSSFSSVNKYGK(bi)HGDEKHHSSK_;_YSSFSSVNKYGK(bi)HGDEK…	0.00217537	2.39325	2.60807	21.673	21.531	21.8375	19.2006	18.3928	19.6239
PF3D7_1149100	Plasmodium falciparum 3D7	Plasmodium exported protein, unknown function	N/A	Previous IDs: PF11_0508;PF3D7_1149100.1;PF3D7_1149100.2	1	0	Biotin (K)	0	1	3	193;233;313	NA	EKTETQEESLNKEVVEGCSTGMCPLKNNDTK	_EKTETQEESLNKEVVEGCSTGMCPLK(bi)NNDTK_;_EKTETQEESLNKEVVEGCSTGMCPLK(bi)NNDTK_;_EKTETQEESLNKEVVEGCSTGMCPLK(bi)NNDTK_;_EKTETQEESLNKEVVEGCSTGMCPLK(bi)NNDTK_	0.00148045	2.52206	2.60275	21.5073	21.3337	22.021	19.0705	18.5366	19.4465
PF3D7_0202000	Plasmodium falciparum 3D7	knob-associated histidine-rich protein	KAHRP	Previous IDs: PF02_0020;PFB0100c	1	0	Biotin (K)	0	1	2	490;491	NA	ENETKNTAGENKK	_ENETKNTAGENK(bi)K_;_ENETKNTAGENKK(bi)_;_ENETKNTAGENK(bi)K_;_ENETKNTAGENK(bi)K_;_ENETKNTAGENK(bi)K_;_ENETKNTAGENKK(bi)_;_ENETKNTAGENK(bi)K_;_ENETKNTAGENK(bi)K_;_ENETKNTAGENK(bi)K_;_ENETKNTAGENK(bi)K_;_ENETKNTAGENK(bi)K_;_ENETKNTAGENK(bi)K_;_ENETKNTAGENK(bi)K_;_ENETKNTAGENK(bi)K_;_ENETKNTAGENK(bi)K_;_ENETKNTAGENK(bi)K_;_ENETKNTAGENK(bi)K_	0.00669841	1.99371	2.60124	22.1853	21.565	21.1857	19.5411	19.3635	18.2277
PF3D7_1201000	Plasmodium falciparum 3D7	Plasmodium exported protein (PHISTb), unknown function	N/A	Previous IDs: 2277.t00010;MAL12P1.10;PFL0050c	1	0	Biotin (K)	0	1	1	517	NA	KDETATINK	_K(bi)DETATINK_;_K(bi)DETATINK_;_K(bi)DETATINK_;_K(bi)DETATINK_;_K(bi)DETATINK_;_K(bi)DETATINK_;_K(bi)DETATINK_;_K(bi)DETATINK_	0.0352293	1.36805	2.59824	20.6561	21.387	20.7678	18.5324	19.6151	16.8687
PF3D7_0731300	Plasmodium falciparum 3D7	Plasmodium exported protein (PHISTb), unknown function	PfG174	Previous IDs: MAL7P1.174	1	0	Biotin (K)	0	1	2	310;313	NA	KILKDMNK	_K(bi)ILKDMNK_;_K(bi)ILKDMNK_;_K(bi)ILKDMNK_;_K(bi)ILKDMNK_;_K(bi)ILKDMNK_;_K(bi)ILKDMNK_;_K(bi)ILK(bi)DMNK_	0.0234727	1.52699	2.59191	22.6949	22.5003	22.4868	19.442	19.0644	21.4
PF3D7_0831700	Plasmodium falciparum 3D7	heat shock protein 70	HSP70x	Previous IDs: MAL7P1.228	1	0	Biotin (K)	0	1	1	189	NA	QATKDAGAIAGLNVLR	_QATK(bi)DAGAIAGLNVLR_;_QATK(bi)DAGAIAGLNVLR_;_QATK(bi)DAGAIAGLNVLR_;_QATK(bi)DAGAIAGLNVLR_;_QATK(bi)DAGAIAGLNVLR_;_QATK(bi)DAGAIAGLNVLR_	0.00294164	2.2924	2.58203	21.2713	22.1017	21.6544	19.7143	18.9116	18.6554
PF3D7_1200700	Plasmodium falciparum 3D7	acyl-CoA synthetase	ACS7	Previous IDs: 2277.t00007;MAL12P1.7;PFL0035c	1	0	Biotin (K)	0	1	2	420	NA	WIAKQAINLRK	_WIAK(bi)QAINLRK_;_WIAK(bi)QAINLRK_;_WIAK(bi)QAINLRK_;_WIAK(bi)QAINLRK_;_WIAK(bi)QAINLRK_;_WIAK(bi)QAINLRK_	0.000486576	2.86362	2.57715	21.3634	20.8961	21.5283	18.6562	18.9772	18.4229
PF3D7_1401200	Plasmodium falciparum 3D7	Plasmodium exported protein, unknown function	N/A	Previous IDs: PF14_0014	1	0	Biotin (K)	0	1	2	117	NA	TSKYDDLRR	_TSK(bi)YDDLRR_;_TSK(bi)YDDLRR_;_TSK(bi)YDDLRR_;_TSK(bi)YDDLRR_;_TSK(bi)YDDLRR_;_TSK(bi)YDDLRR_	0.00505717	2.0952	2.5719	21.8579	21.1922	21.8782	19.3556	19.5798	18.2772
P11166	Homo sapiens (Human)	Solute carrier family 2, facilitated glucose transporter member 1 (Glucose transporter type 1, erythrocyte/brain) (GLUT-1) (HepG2 glucose transporter)	SLC2A1 GLUT1	NA	0	1	Biotin (K)	0	1	1	477	NA	QGGASQSDKTPEELFHPLGADSQV	_QGGASQSDK(bi)TPEELFHPLGADSQV_;_QGGASQSDK(bi)TPEELFHPLGADSQV_;_QGGASQSDK(bi)TPEELFHPLGADSQV_;_QGGASQSDK(bi)TPEELFHPLGADSQV_;_QGGASQSDK(bi)TPEELFHPLGADSQV_;_QGGASQSDK(bi)TPEELFHPLGADSQV_;_QGGASQSDK(bi)TPEELFHPLGADSQV_;_QGGASQSDK(bi)TPEELFHPLGADSQV_;_QGGASQSDK(bi)TPEELFHPLGADSQV_;_QGGASQSDK(bi)TPEELFHPLGADSQV_;_QGGASQSDK(bi)TPEELFHPLGADSQV_;_QGGASQSDK(bi)TPEELFHPLGADSQV_;_QGGASQSDK(bi)TPEELFHPLGADS…	0.000130321	3.21478	2.56375	28.1277	28.5678	28.2393	25.8866	25.8414	25.5155
PF3D7_0500800	Plasmodium falciparum 3D7	mature parasite-infected erythrocyte surface antigen	MESA	Previous IDs: MAL5P1.9;PFE0040c	1	0	Biotin (K)	0	1	2	1186	NA	KPIDDCKK	_K(bi)PIDDCKK_;_K(bi)PIDDCKK_;_K(bi)PIDDCKK_;_K(bi)PIDDCKK_;_K(bi)PIDDCKK_;_K(bi)PIDDCKK_;_K(bi)PIDDCKK_;_K(bi)PIDDCKK_;_K(bi)PIDDCKK_	0.00179337	2.46056	2.55329	22.3732	21.5095	21.814	18.9305	19.7469	19.3594
PF3D7_0730800	Plasmodium falciparum 3D7	Plasmodium exported protein, unknown function	N/A	Previous IDs: MAL7P1.170;PF3D7_0730800.1;PF3D7_0730800.2	1	0	Biotin (K)	0	1	1	194;197	NA	SFGGDFSNTVQGATGIPGKLFK	_SFGGDFSNTVQGATGIPGK(bi)LFK_;_SFGGDFSNTVQGATGIPGK(bi)LFK_;_SFGGDFSNTVQGATGIPGK(bi)LFK_;_SFGGDFSNTVQGATGIPGK(bi)LFK_;_SFGGDFSNTVQGATGIPGK(bi)LFK_;_SFGGDFSNTVQGATGIPGK(bi)LFK_;_SFGGDFSNTVQGATGIPGK(bi)LFK_;_SFGGDFSNTVQGATGIPGK(bi)LFK_;_SFGGDFSNTVQGATGIPGK(bi)LFK_;_SFGGDFSNTVQGATGIPGK(bi)LFK_;_SFGGDFSNTVQGATGIPGK(bi)LFK_;_SFGGDFSNTVQGATGIPGK(bi)LFK_;_SFGGDFSNTVQGATGIPGK(bi)LFK_;_SFGGDFSNTVQGATGIPGK(b…	0.000215492	3.09579	2.54279	24.7714	24.9712	24.336	22.1958	22.0198	22.2347
PF3D7_1001000	Plasmodium falciparum 3D7	Plasmodium exported protein (hyp12), unknown function	PfJ13	Previous IDs: PF10_0013	1	0	Biotin (K)	0	1	1	89	NA	SLKGTELDVTSYNK	_SLK(bi)GTELDVTSYNK_;_SLK(bi)GTELDVTSYNK_;_SLK(bi)GTELDVTSYNK_;_SLK(bi)GTELDVTSYNK_;_SLK(bi)GTELDVTSYNK_;_SLK(bi)GTELDVTSYNK_;_SLK(bi)GTELDVTSYNK_;_SLK(bi)GTELDVTSYNK_;_SLK(bi)GTELDVTSYNK_;_SLK(bi)GTELDVTSYNK_;_SLK(bi)GTELDVTSYNK_;_SLK(bi)GTELDVTSYNK_;_SLK(bi)GTELDVTSYNK_;_SLK(bi)GTELDVTSYNK_;_SLK(bi)GTELDVTSYNK_;_SLK(bi)GTELDVTSYNK_;_SLK(bi)GTELDVTSYNK_;_SLK(bi)GTELDVTSYNK_;_SLK(bi)GTELDVTSYNK_	0.000117001	3.24087	2.52904	25.3875	25.1829	25.3997	22.4992	23.0183	22.8654
PF3D7_0302200	Plasmodium falciparum 3D7	cytoadherence linked asexual protein 3.2	CLAG3.2	Previous IDs: MAL3P1.2;PFC0110w	1	0	Biotin (K)	0	1	2	1320	NA	RYDMENAFKNK	_RYDMENAFK(bi)NK_;_RYDMENAFK(bi)NK_;_RYDMENAFK(bi)NK_;_RYDMENAFK(bi)NK_;_RYDMENAFK(bi)NK_;_RYDMENAFK(bi)NK_;_RYDMENAFK(bi)NK_	0.0123691	1.76891	2.51931	21.5526	21.126	21.7419	19.0824	19.8413	17.939
PF3D7_0302500	Plasmodium falciparum 3D7	cytoadherence linked asexual protein 3.1	CLAG3.1	Previous IDs: MAL3P1.5;PFC0120w	1	0	Biotin (K)	0	1	2	1321	NA	RYDMENAFKNK	_RYDMENAFK(bi)NK_;_RYDMENAFK(bi)NK_;_RYDMENAFK(bi)NK_;_RYDMENAFK(bi)NK_;_RYDMENAFK(bi)NK_;_RYDMENAFK(bi)NK_;_RYDMENAFK(bi)NK_	0.0123691	1.76891	2.51931	21.5526	21.126	21.7419	19.0824	19.8413	17.939
PF3D7_0500800	Plasmodium falciparum 3D7	mature parasite-infected erythrocyte surface antigen	MESA	Previous IDs: MAL5P1.9;PFE0040c	1	0	Biotin (K)	0	1	1	549	NA	VIGSEKTQK	_VIGSEK(bi)TQK_;_VIGSEK(bi)TQK_;_VIGSEK(bi)TQK_;_VIGSEK(bi)TQK_;_VIGSEK(bi)TQK_;_VIGSEK(bi)TQK_	0.000305996	3.0037	2.51611	21.4864	21.4241	21.2326	19.2641	18.7096	18.6212
PF3D7_1001000	Plasmodium falciparum 3D7	Plasmodium exported protein (hyp12), unknown function	PfJ13	Previous IDs: PF10_0013	1	0	Biotin (K)	0	1	2	141;127	NA	KNETYLFDENTNEYKLR	_KNETYLFDENTNEYK(bi)LR_;_K(bi)NETYLFDENTNEYKLR_;_KNETYLFDENTNEYK(bi)LR_;_K(bi)NETYLFDENTNEYKLR_;_KNETYLFDENTNEYK(bi)LR_;_K(bi)NETYLFDENTNEYKLR_;_K(bi)NETYLFDENTNEYKLR_;_KNETYLFDENTNEYK(bi)LR_;_KNETYLFDENTNEYK(bi)LR_	0.00887401	1.89074	2.51319	21.9539	21.5358	22.2784	19.3465	18.6085	20.2735
PF3D7_0201900	Plasmodium falciparum 3D7	erythrocyte membrane protein 3	EMP3	Previous IDs: PF02_0019;PFB0095c	1	0	Biotin (K)	0	1	1	1408	NA	NTPSEGQQNTGLKNTPIEGQQNTGLK	_NTPSEGQQNTGLK(bi)NTPIEGQQNTGLK_;_NTPSEGQQNTGLK(bi)NTPIEGQQNTGLK_;_NTPSEGQQNTGLK(bi)NTPIEGQQNTGLK_;_NTPSEGQQNTGLK(bi)NTPIEGQQNTGLK_;_NTPSEGQQNTGLK(bi)NTPIEGQQNTGLK_;_NTPSEGQQNTGLK(bi)NTPIEGQQNTGLK_;_NTPSEGQQNTGLK(bi)NTPIEGQQNTGLK_	0.00419077	2.16535	2.5087	21.9758	21.582	22.3702	19.6915	18.7604	19.9501
PF3D7_1477500	Plasmodium falciparum 3D7	Plasmodium exported protein (PHISTb), unknown function	N/A	Previous IDs: PF14_0746	1	0	Biotin (K)	0	1	2	326	NA	LKIKSK	_LKIK(bi)SK_;_LKIK(bi)SK_;_LKIK(bi)SK_;_LKIK(bi)SK_;_LKIK(bi)SK_;_LKIK(bi)SK_	0.00137984	2.54666	2.5081	21.5542	21.1269	21.2982	18.6264	18.4373	19.3912
PF3D7_0730900	Plasmodium falciparum 3D7	EMP1-trafficking protein	PTP4	Previous IDs: MAL7P1.171	1	0	Biotin (K);Oxidation (M)	0	1	2	168;161	NA	NVLEKYNDYASKSHGMSSVLK	_NVLEKYNDYASK(bi)SHGMSSVLK_;_NVLEKYNDYASK(bi)SHGMSSVLK_;_NVLEKYNDYASK(bi)SHGMSSVLK_;_NVLEKYNDYASK(bi)SHGMSSVLK_;_NVLEKYNDYASK(bi)SHGMSSVLK_;_NVLEKYNDYASK(bi)SHGMSSVLK_;_NVLEKYNDYASK(bi)SHGMSSVLK_;_NVLEKYNDYASK(bi)SHGMSSVLK_;_NVLEKYNDYASK(bi)SHGMSSVLK_;_NVLEKYNDYASK(bi)SHGMSSVLK_;_NVLEKYNDYASK(bi)SHGMSSVLK_;_NVLEKYNDYASK(bi)SHGMSSVLK_;_NVLEKYNDYASK(bi)SHGMSSVLK_;_NVLEKYNDYASK(bi)SHGMSSVLK_;_NVLEKY…	0.00520236	2.08547	2.50467	21.1286	20.4712	21.5562	18.2828	19.1922	18.167
PF3D7_0202000	Plasmodium falciparum 3D7	knob-associated histidine-rich protein	KAHRP	Previous IDs: PF02_0020;PFB0100c	1	0	Biotin (K)	0	1	3	405;432;407;434;408;435	NA	HKDNEDAESVKSKK	_HKDNEDAESVK(bi)SKK_;_HKDNEDAESVK(bi)SKK_;_HKDNEDAESVKSK(bi)K_;_HKDNEDAESVKSKK(bi)_;_HKDNEDAESVKSK(bi)K_;_HKDNEDAESVKSKK(bi)_;_HKDNEDAESVKSK(bi)K_;_HKDNEDAESVKSKK(bi)_;_HKDNEDAESVKSKK(bi)_;_HKDNEDAESVKSKK(bi)_;_HKDNEDAESVKSK(bi)K_;_HKDNEDAESVKSKK(bi)_	0.0247549	1.50541	2.49698	21.9769	21.265	22.0416	20.306	19.4655	18.021
PF3D7_0202000	Plasmodium falciparum 3D7	knob-associated histidine-rich protein	KAHRP	Previous IDs: PF02_0020;PFB0100c	1	0	Biotin (K)	0	1	1	354	NA	YGKHGDEK	_YGK(bi)HGDEK_;_YGK(bi)HGDEK_;_YGK(bi)HGDEK_;_YGK(bi)HGDEK_;_YGK(bi)HGDEK_;_YGK(bi)HGDEK_;_YGK(bi)HGDEK_;_YGK(bi)HGDEK_;_YGK(bi)HGDEK_;_YGK(bi)HGDEK_;_YGK(bi)HGDEK_;_YGK(bi)HGDEK_;_YGK(bi)HGDEK_;_YGK(bi)HGDEK_;_YGK(bi)HGDEK_;_YGK(bi)HGDEK_;_YGK(bi)HGDEK_;_YGK(bi)HGDEK_;_YGK(bi)HGDEK_;_YGK(bi)HGDEK_;_YGK(bi)HGDEK_;_YGK(bi)HGDEK_;_YGK(bi)HGDEK_	0.0589684	1.16157	2.49552	24.2939	22.9938	23.2375	19.2955	22.0655	21.6776
PF3D7_1200700	Plasmodium falciparum 3D7	acyl-CoA synthetase	ACS7	Previous IDs: 2277.t00007;MAL12P1.7;PFL0035c	1	0	Biotin (K)	0	1	3	876	NA	KSEEKPVSKTVQK	_KSEEKPVSK(bi)TVQK_;_KSEEKPVSK(bi)TVQK_;_KSEEKPVSK(bi)TVQK_;_KSEEKPVSK(bi)TVQK_;_KSEEKPVSK(bi)TVQK_;_KSEEKPVSK(bi)TVQK_;_KSEEKPVSK(bi)TVQK_;_KSEEKPVSK(bi)TVQK_;_KSEEKPVSK(bi)TVQK_;_KSEEKPVSK(bi)TVQK_;_KSEEKPVSK(bi)TVQK_;_KSEEKPVSK(bi)TVQK_;_KSEEKPVSK(bi)T(ph)VQK_;_KSEEKPVSK(bi)T(ph)VQK_;_KSEEKPVSK(bi)T(ph)VQK_	1.54873e-05	3.74297	2.49485	21.4018	21.2798	21.5648	18.8271	19.0234	18.9114
PF3D7_0201900	Plasmodium falciparum 3D7	erythrocyte membrane protein 3	EMP3	Previous IDs: PF02_0019;PFB0095c	1	0	Biotin (K)	0	1	2	887;909;997;1019;1041;889;911;999;1021;1043	NA	ARENLEEYNETDLAKGK	_ARENLEEYNETDLAK(bi)GK_;_ARENLEEYNETDLAK(bi)GK_;_ARENLEEYNETDLAK(bi)GK_;_ARENLEEYNETDLAKGK(bi)_;_ARENLEEYNETDLAK(bi)GK_;_ARENLEEYNETDLAK(bi)GK_;_ARENLEEYNETDLAK(bi)GK_	0.00337571	2.2448	2.48919	21.3741	21.9312	21.6992	19.8937	18.6912	18.9521
PF3D7_0730900	Plasmodium falciparum 3D7	EMP1-trafficking protein	PTP4	Previous IDs: MAL7P1.171	1	0	Biotin (K)	0	1	2	2102	NA	GVNVQSSNTNKHMPRK	_GVNVQSSNTNK(bi)HMPRK_;_GVNVQSSNTNK(bi)HMPRK_;_GVNVQSSNTNK(bi)HMPRK_;_GVNVQSSNTNK(bi)HMPRK_;_GVNVQSSNTNK(bi)HMPRK_;_GVNVQSSNTNK(bi)HMPRK_;_GVNVQSSNTNK(bi)HMPRK_;_GVNVQSSNTNK(bi)HMPRK_;_GVNVQSSNTNK(bi)HMPRK_;_GVNVQSSNTNK(bi)HMPRK_;_GVNVQSSNTNK(bi)HMPRK_;_GVNVQSSNTNK(bi)HMPRK_;_GVNVQSSNTNK(bi)HM(ox)PRK_;_GVNVQSSNTNK(bi)HM(ox)PRK_	0.000302518	3.0037	2.48692	22.5163	22.3631	22.8045	19.9568	20.4058	19.8606
PF3D7_0936800	Plasmodium falciparum 3D7	Plasmodium exported protein (PHISTc), unknown function	N/A	Previous IDs: PFI1780w	1	0	Biotin (K)	0	1	1	92	NA	SLSDEINKCDMK	_SLSDEINK(bi)CDMK_;_SLSDEINK(bi)CDMK_;_SLSDEINK(bi)CDMK_;_SLSDEINK(bi)CDMK_;_SLSDEINK(bi)CDMK_;_SLSDEINK(bi)CDMK_;_SLSDEINK(bi)CDMK_	0.00179138	2.46056	2.48204	21.6828	21.4603	21.6915	19.7804	18.8654	18.7425
PF3D7_0500800	Plasmodium falciparum 3D7	mature parasite-infected erythrocyte surface antigen	MESA	Previous IDs: MAL5P1.9;PFE0040c	1	0	Biotin (K);Oxidation (M)	0	1	2	1123	NA	MIGKEVIIEEVKEEVK	_M(ox)IGK(bi)EVIIEEVKEEVK_;_M(ox)IGK(bi)EVIIEEVKEEVK_;_M(ox)IGK(bi)EVIIEEVKEEVK_;_M(ox)IGK(bi)EVIIEEVKEEVK_;_M(ox)IGK(bi)EVIIEEVKEEVK_;_M(ox)IGK(bi)EVIIEEVKEEVK_;_M(ox)IGK(bi)EVIIEEVKEEVK_;_M(ox)IGK(bi)EVIIEEVKEEVK_;_M(ox)IGK(bi)EVIIEEVKEEVK_;_M(ox)IGK(bi)EVIIEEVKEEVK_;_M(ox)IGK(bi)EVIIEEVKEEVK_;_M(ox)IGK(bi)EVIIEEVKEEVK_;_M(ox)IGK(bi)EVIIEEVKEEVK_;_M(ox)IGK(bi)EVIIEEVKEEVK_;_M(ox)IGK(bi)EVIIEEVK…	0.00435526	2.15021	2.47839	25.2974	26.5751	25.5753	23.675	23.0787	23.2589
PF3D7_0202000	Plasmodium falciparum 3D7	knob-associated histidine-rich protein	KAHRP	Previous IDs: PF02_0020;PFB0100c	1	0	Biotin (K)	0	1	3	490;491;483	NA	KENETKNTAGENKK	_KENETKNTAGENK(bi)K_;_KENETKNTAGENK(bi)K_;_KENETKNTAGENK(bi)K_;_KENETKNTAGENKK(bi)_;_KENETKNTAGENK(bi)K_;_KENETKNTAGENK(bi)K_;_KENETKNTAGENK(bi)K_;_KENETKNTAGENK(bi)K_;_KENETK(bi)NTAGENKK_;_KENETKNTAGENK(bi)K_;_KENETK(bi)NTAGENKK_;_KENETK(bi)NTAGENKK_	0.00247473	2.3512	2.47667	21.427	20.719	21.5802	18.4313	19.2579	18.607
PF3D7_0500800	Plasmodium falciparum 3D7	mature parasite-infected erythrocyte surface antigen	MESA	Previous IDs: MAL5P1.9;PFE0040c	1	0	Biotin (K)	0	1	2	584;617;650	NA	GIKENDTEGNDKVK	_GIKENDTEGNDK(bi)VK_;_GIKENDTEGNDK(bi)VK_;_GIKENDTEGNDK(bi)VK_;_GIKENDTEGNDK(bi)VK_;_GIKENDTEGNDK(bi)VK_;_GIKENDTEGNDK(bi)VK_;_GIKENDTEGNDK(bi)VK_;_GIKENDTEGNDK(bi)VK_;_GIKENDTEGNDK(bi)VK_;_GIKENDTEGNDK(bi)VK_;_GIKENDTEGNDK(bi)VK_;_GIKENDTEGNDK(bi)VK_;_GIKENDTEGNDK(bi)VK_;_GIKENDTEGNDK(bi)VK_	0.00196661	2.42775	2.47108	21.98	22.3857	22.2786	19.8993	20.2049	19.127
PF3D7_0532400	Plasmodium falciparum 3D7	lysine-rich membrane-associated PHISTb protein	LyMP	Previous IDs: MAL5P1.315;PFE1605w	1	0	Biotin (K)	0	1	3	440	NA	KNPEMLTENQINEEENENTKVGGANTKVR	_KNPEMLTENQINEEENENTKVGGANTK(bi)VR_;_KNPEMLTENQINEEENENTKVGGANTK(bi)VR_;_KNPEMLTENQINEEENENTKVGGANTK(bi)VR_;_KNPEMLTENQINEEENENTKVGGANTK(bi)VR_;_KNPEMLTENQINEEENENTKVGGANTK(bi)VR_;_KNPEMLTENQINEEENENTKVGGANTK(bi)VR_	0.000362243	2.95174	2.45751	21.3795	21.3466	21.6825	19.3656	18.7069	18.9636
PF3D7_1001000	Plasmodium falciparum 3D7	Plasmodium exported protein (hyp12), unknown function	PfJ13	Previous IDs: PF10_0013	1	0	Biotin (K)	0	1	2	102	NA	SKHTQQNNLGDSLKR	_SK(bi)HTQQNNLGDSLKR_;_SK(bi)HTQQNNLGDSLKR_;_SK(bi)HTQQNNLGDSLKR_;_SK(bi)HTQQNNLGDSLKR_;_SK(bi)HTQQNNLGDSLKR_;_SK(bi)HTQQNNLGDSLKR_;_SK(bi)HTQQNNLGDSLKR_;_SK(bi)HTQQNNLGDSLKR_;_SK(bi)HTQQNNLGDSLKR_;_SK(bi)HTQQNNLGDSLKR_;_SK(bi)HTQQNNLGDSLKR_;_SK(bi)HTQQNNLGDSLKR_	8.39534e-05	3.32842	2.45104	21.7671	21.8211	21.993	19.2329	19.6736	19.3216
P37840	Homo sapiens (Human)	Alpha-synuclein (Non-A beta component of AD amyloid) (Non-A4 component of amyloid precursor) (NACP)	SNCA NACP PARK1	NA	0	1	Biotin (K)	0	1	1	97;96	NA	TVEGAGSIAAATGFVKK	_TVEGAGSIAAATGFVKK(bi)_;_TVEGAGSIAAATGFVK(bi)K_;_TVEGAGSIAAATGFVK(bi)K_;_TVEGAGSIAAATGFVKK(bi)_;_TVEGAGSIAAATGFVKK(bi)_;_TVEGAGSIAAATGFVK(bi)K_	0.00158631	2.49858	2.44594	21.5904	21.2964	21.6129	19.6487	18.8662	18.6469
Q9Y5K6	Homo sapiens (Human)	CD2-associated protein (Adapter protein CMS) (Cas ligand with multiple SH3 domains)	CD2AP	NA	0	1	Biotin (K)	0	1	3	243	NA	TSSSETEEKKPEKPLILQSLGPK	_TSSSETEEKKPEK(bi)PLILQSLGPK_;_TSSSETEEKKPEK(bi)PLILQSLGPK_;_TSSSETEEKKPEK(bi)PLILQSLGPK_;_TSSSETEEKKPEK(bi)PLILQSLGPK_	0.019039	1.60838	2.44278	22.5267	21.4912	21.5713	18.322	19.9456	19.9932
PF3D7_0500800	Plasmodium falciparum 3D7	mature parasite-infected erythrocyte surface antigen	MESA	Previous IDs: MAL5P1.9;PFE0040c	1	0	2 Biotin (K)	0	2	2	1373;1378	NA	QKAELDKK	_QK(bi)AELDKK_;_QK(bi)AELDKK_;_QK(bi)AELDKK_;_QK(bi)AELDKK_;_QK(bi)AELDKK_;_QKAELDK(bi)K_;_QK(bi)AELDKK_;_QKAELDK(bi)K_;_QK(bi)AELDKK_;_QKAELDK(bi)K_;_QK(bi)AELDKK_;_QKAELDK(bi)K_;_QK(bi)AELDKK_;_QK(bi)AELDKK_;_QK(bi)AELDKK_;_QK(bi)AELDKK_;_QK(bi)AELDKK_;_QK(bi)AELDKK_;_QK(bi)AELDKK_;_QK(bi)AELDKK_;_QK(bi)AELDKK_;_QK(bi)AELDKK_;_QK(bi)AELDKK_;_QK(bi)AELDKK_;_QK(bi)AELDKK_;_QK(bi)AELDKK_;_QK(bi)AE…	0.000946238	2.65516	2.4384	21.9988	21.8201	22.0727	20.0148	19.0877	19.474
PF3D7_0936800	Plasmodium falciparum 3D7	Plasmodium exported protein (PHISTc), unknown function	N/A	Previous IDs: PFI1780w	1	0	Biotin (K)	0	1	3	307;322;312	NA	VQPPKVQQQKVQPPKSQQQK	_VQPPK(bi)VQQQKVQPPKSQQQK_;_VQPPK(bi)VQQQKVQPPKSQQQK_;_VQPPK(bi)VQQQKVQPPKSQQQK_;_VQPPKVQQQKVQPPKSQQQK(bi)_;_VQPPKVQQQK(bi)VQPPKSQQQK_;_VQPPK(bi)VQQQKVQPPKSQQQK_;_VQPPK(bi)VQQQKVQPPKSQQQK_;_VQPPK(bi)VQQQKVQPPKSQQQK_;_VQPPK(bi)VQQQKVQPPKSQQQK_	0.00302145	2.28301	2.43709	21.3227	21.1812	22.1335	18.6378	19.3041	19.3842
PF3D7_0730800	Plasmodium falciparum 3D7	Plasmodium exported protein, unknown function	N/A	Previous IDs: MAL7P1.170;PF3D7_0730800.1;PF3D7_0730800.2	1	0	Biotin (K)	0	1	1	101	NA	GIKSNLFSK	_GIK(bi)SNLFSK_;_GIK(bi)SNLFSK_;_GIK(bi)SNLFSK_;_GIK(bi)SNLFSK_;_GIK(bi)SNLFSK_;_GIK(bi)SNLFSK_;_GIK(bi)SNLFSK_;_GIK(bi)SNLFSK_;_GIK(bi)SNLFSK_;_GIK(bi)SNLFSK_;_GIK(bi)SNLFSK_;_GIK(bi)SNLFSK_	5.48778e-05	3.43605	2.41441	28.4477	28.0708	28.4668	25.8959	25.8656	25.9805
PF3D7_0532300	Plasmodium falciparum 3D7	Plasmodium exported protein (PHISTb), unknown function	N/A	Previous IDs: MAL5P1.314;PFE1600w	1	0	Biotin (K)	0	1	2	171	NA	NGKHEMDNIMNKELFK	_NGK(bi)HEMDNIMNKELFK_;_NGK(bi)HEMDNIMNKELFK_;_NGK(bi)HEMDNIMNKELFK_;_NGK(bi)HEMDNIMNKELFK_	0.0296656	1.43342	2.39618	21.8746	21.6946	20.7443	20.0494	19.2027	17.8729
PF3D7_0202000	Plasmodium falciparum 3D7	knob-associated histidine-rich protein	KAHRP	Previous IDs: PF02_0020;PFB0100c	1	0	Biotin (K)	0	1	3	555;561	NA	EASTSKEATKEASTSKEATK	_EASTSKEATK(bi)EASTSKEATK_;_EASTSKEATKEASTSK(bi)EATK_;_EASTSKEATK(bi)EASTSKEATK_;_EASTSKEATK(bi)EASTSKEATK_;_EASTSKEATK(bi)EASTSKEATK_;_EASTSKEATK(bi)EASTSKEATK_;_EASTSKEATK(bi)EASTSKEATK_;_EASTSKEATK(bi)EASTSKEATK_;_EASTSKEATK(bi)EASTSKEATK_;_EASTSKEATK(bi)EASTSKEATK_;_EASTSKEATK(bi)EASTSKEATK_;_EASTSKEATK(bi)EASTSKEATK_;_EASTSKEATK(bi)EASTSKEATK_;_EAS(ph)TSKEATK(bi)EASTSKEATK_;_EAS(ph)TSKEATK(b…	0.010014	1.84615	2.39545	21.8911	22.2735	21.2353	19.9206	19.7273	18.5657
PF3D7_0500800	Plasmodium falciparum 3D7	mature parasite-infected erythrocyte surface antigen	MESA	Previous IDs: MAL5P1.9;PFE0040c	1	0	Biotin (K)	0	1	1	543	NA	DKVIGSEK	_DK(bi)VIGSEK_;_DK(bi)VIGSEK_;_DK(bi)VIGSEK_;_DK(bi)VIGSEK_;_DK(bi)VIGSEK_;_DK(bi)VIGSEK_;_DK(bi)VIGSEK_;_DK(bi)VIGSEK_;_DK(bi)VIGSEK_;_DK(bi)VIGSEK_	0.000211111	3.09579	2.38992	23.3939	23.4673	23.3266	20.6918	21.006	21.3202
PF3D7_0936800	Plasmodium falciparum 3D7	Plasmodium exported protein (PHISTc), unknown function	N/A	Previous IDs: PFI1780w	1	0	Biotin (K)	0	1	2	92	NA	SLSDEINKCDMKK	_SLSDEINK(bi)CDMKK_;_SLSDEINK(bi)CDMKK_;_SLSDEINK(bi)CDMKK_;_SLSDEINK(bi)CDMKK_;_SLSDEINK(bi)CDMKK_;_SLSDEINK(bi)CDMKK_	0.00336274	2.24592	2.37531	21.4849	21.2272	21.5121	18.8803	19.7356	18.4824
PF3D7_0500800	Plasmodium falciparum 3D7	mature parasite-infected erythrocyte surface antigen	MESA	Previous IDs: MAL5P1.9;PFE0040c	1	0	Biotin (K)	0	1	2	316;313	NA	IYEETKYNKITSEFR	_IYEETKYNK(bi)ITSEFR_;_IYEETKYNK(bi)ITSEFR_;_IYEETKYNK(bi)ITSEFR_;_IYEETK(bi)YNKITSEFR_;_IYEETKYNK(bi)ITSEFR_;_IYEETKYNK(bi)ITSEFR_;_IYEETKYNK(bi)ITSEFR_;_IYEETK(bi)YNKITSEFR_;_IYEETKYNK(bi)ITSEFR_;_IYEETKYNK(bi)ITSEFR_;_IYEETKYNK(bi)ITSEFR_;_IYEETK(bi)YNKITSEFR_;_IYEETKYNK(bi)ITSEFR_;_IYEETKYNK(bi)ITSEFR_;_IYEETKYNK(bi)ITSEFR_;_IYEETK(bi)YNKITSEFR_;_IYEETKYNK(bi)ITSEFR_;_IYEETKYNK(bi)ITSEFR_;_IY…	0.00012796	3.21629	2.37372	27.2214	27.198	26.9742	25.0418	24.6115	24.6191
PF3D7_0500800	Plasmodium falciparum 3D7	mature parasite-infected erythrocyte surface antigen	MESA	Previous IDs: MAL5P1.9;PFE0040c	1	0	Biotin (K)	0	1	3	543	NA	NDGKKDKVIGSEK	_NDGKKDK(bi)VIGSEK_;_NDGKKDK(bi)VIGSEK_;_NDGKKDK(bi)VIGSEK_;_NDGKKDK(bi)VIGSEK_;_NDGKKDK(bi)VIGSEK_;_NDGKKDK(bi)VIGSEK_	0.000850921	2.69364	2.36836	22.0675	21.6551	21.8389	19.2799	19.9547	19.2218
PF3D7_0936800	Plasmodium falciparum 3D7	Plasmodium exported protein (PHISTc), unknown function	N/A	Previous IDs: PFI1780w	1	0	Biotin (K)	0	1	2	267	NA	GIFAKGYLGEVESETIKK	_GIFAK(bi)GYLGEVESETIKK_;_GIFAK(bi)GYLGEVESETIKK_;_GIFAK(bi)GYLGEVESETIKK_;_GIFAK(bi)GYLGEVESETIKK_;_GIFAK(bi)GYLGEVESETIKK_;_GIFAK(bi)GYLGEVESETIKK_;_GIFAK(bi)GYLGEVESETIKK_;_GIFAK(bi)GYLGEVESETIKK_;_GIFAK(bi)GYLGEVESETIKK_;_GIFAK(bi)GYLGEVESETIKK_;_GIFAK(bi)GYLGEVESETIKK_;_GIFAK(bi)GYLGEVESETIKK_;_GIFAK(bi)GYLGEVESETIKK_;_GIFAK(bi)GYLGEVESETIKK_;_GIFAK(bi)GYLGEVESETIKK_;_GIFAK(bi)GYLGEVESETIKK_…	0.00225846	2.38235	2.36646	26.205	26.6994	26.0621	24.4077	24.0183	23.4411
PF3D7_1001600	Plasmodium falciparum 3D7	exported lipase 2	XL2	Previous IDs: PF10_0020	1	0	Biotin (K)	0	1	3	289;291	NA	KGKCESCDINELKK	_K(bi)GKCESCDINELKK_;_KGK(bi)CESCDINELKK_;_KGK(bi)CESCDINELKK_;_KGK(bi)CESCDINELKK_;_KGK(bi)CESCDINELKK_;_KGK(bi)CESCDINELKK_;_KGK(bi)CESCDINELKK_	0.0121984	1.77227	2.36094	21.4053	20.9954	20.2047	19.2291	17.7968	18.4967
PF3D7_0500800	Plasmodium falciparum 3D7	mature parasite-infected erythrocyte surface antigen	MESA	Previous IDs: MAL5P1.9;PFE0040c	1	0	Biotin (K)	0	1	1	199	NA	KHVNVMGESK	_K(bi)HVNVM(ox)GESK_;_K(bi)HVNVM(ox)GESK_;_K(bi)HVNVM(ox)GESK_;_K(bi)HVNVM(ox)GESK_;_K(bi)HVNVM(ox)GESK_;_K(bi)HVNVM(ox)GESK_;_K(bi)HVNVM(ox)GESK_;_K(bi)HVNVM(ox)GESK_;_K(bi)HVNVM(ox)GESK_;_K(bi)HVNVM(ox)GESK_;_K(bi)HVNVM(ox)GESK_;_K(bi)HVNVM(ox)GESK_;_K(bi)HVNVM(ox)GESK_;_K(bi)HVNVM(ox)GESK_;_K(bi)HVNVM(ox)GESK_;_K(bi)HVNVM(ox)GESK_;_K(bi)HVNVM(ox)GESK_;_K(bi)HVNVM(ox)GESK_;_K(bi)HVNVM(ox)GESK_;…	0.000127569	3.21629	2.35976	27.0582	26.8501	26.7585	24.334	24.7882	24.4653
PF3D7_0202000	Plasmodium falciparum 3D7	knob-associated histidine-rich protein	KAHRP	Previous IDs: PF02_0020;PFB0100c	1	0	Biotin (K)	0	1	1	351;354	NA	YSSFSSVNKYGK	_YSSFSSVNK(bi)YGK_;_YSSFSSVNK(bi)YGK_;_YSSFSSVNK(bi)YGK_;_YSSFSSVNK(bi)YGK_;_YSSFSSVNK(bi)YGK_;_YSSFSSVNK(bi)YGK_;_YSSFSSVNK(bi)YGK_;_YSSFSSVNK(bi)YGK_;_YSSFSSVNKYGK(bi)_;_YSSFSSVNK(bi)YGK_;_YSSFSSVNK(bi)YGK_;_YSSFSSVNK(bi)YGK_;_YSSFSSVNK(bi)YGK_;_YSSFSSVNK(bi)YGK_;_YSSFSSVNK(bi)YGK_;_YSSFSSVNKYGK(bi)_;_YSSFSSVNK(bi)YGK_;_YSSFSSVNK(bi)YGK_;_YSSFSSVNK(bi)YGK_;_YSSFSSVNK(bi)YGK_;_YSSFSSVNK(bi)YGK_;…	0.00524298	2.0826	2.35912	27.7789	27.6794	27.9336	25.6056	26.0683	24.6406
P37840	Homo sapiens (Human)	Alpha-synuclein (Non-A beta component of AD amyloid) (Non-A4 component of amyloid precursor) (NACP)	SNCA NACP PARK1	NA	0	1	Acetyl (Protein N-term);Biotin (K);Oxidation (M)	0	1	1	6;10	NA	MDVFMKGLSK	_(ac)MDVFM(ox)K(bi)GLSK_;_(ac)M(ox)DVFMK(bi)GLSK_;_(ac)M(ox)DVFMKGLSK(bi)_;_(ac)MDVFM(ox)K(bi)GLSK_;_(ac)MDVFM(ox)K(bi)GLSK_;_(ac)M(ox)DVFMK(bi)GLSK_;_(ac)MDVFM(ox)K(bi)GLSK_;_(ac)MDVFM(ox)K(bi)GLSK_;_(ac)M(ox)DVFMK(bi)GLSK_;_(ac)MDVFM(ox)K(bi)GLSK_;_(ac)M(ox)DVFMK(bi)GLSK_;_(ac)MDVFM(ox)K(bi)GLSK_;_(ac)M(ox)DVFMK(bi)GLSK_;_(ac)MDVFM(ox)K(bi)GLSK_;_(ac)M(ox)DVFMK(bi)GLSK_;_(ac)M(ox)DVFMKGLSK(bi)_…	0.00697505	1.97809	2.35177	22.7891	23.5518	23.6856	21.6257	20.3551	20.9904
PF3D7_1039000	Plasmodium falciparum 3D7	serine/threonine protein kinase, FIKK family	FIKK10.2	Previous IDs: PF10_0380	1	0	Biotin (K)	0	1	2	235	NA	ISNEKIELVNGNSKDK	_ISNEK(bi)IELVNGNSKDK_;_ISNEK(bi)IELVNGNSKDK_;_ISNEK(bi)IELVNGNSKDK_;_ISNEK(bi)IELVNGNSKDK_;_ISNEK(bi)IELVNGNSKDK_	0.0108895	1.81433	2.347	21.5244	21.11	20.8559	17.9006	19.5502	18.9985
PF3D7_0936800	Plasmodium falciparum 3D7	Plasmodium exported protein (PHISTc), unknown function	N/A	Previous IDs: PFI1780w	1	0	Biotin (K)	0	1	3	297;302	NA	KTEHHENVNEDNVEKPKLQQHK	_KTEHHENVNEDNVEKPK(bi)LQQHK_;_KTEHHENVNEDNVEKPK(bi)LQQHK_;_KTEHHENVNEDNVEKPK(bi)LQQHK_;_KTEHHENVNEDNVEKPK(bi)LQQHK_;_KTEHHENVNEDNVEKPK(bi)LQQHK_;_KTEHHENVNEDNVEKPK(bi)LQQHK_;_KTEHHENVNEDNVEKPK(bi)LQQHK_;_KTEHHENVNEDNVEKPK(bi)LQQHK_;_KTEHHENVNEDNVEKPK(bi)LQQHK_;_KTEHHENVNEDNVEKPK(bi)LQQHK_;_KTEHHENVNEDNVEKPK(bi)LQQHK_;_KTEHHENVNEDNVEKPK(bi)LQQHK_;_KTEHHENVNEDNVEKPK(bi)LQQHK_;_KTEHHENVNEDNVEKPK(bi)…	0.000225447	3.0815	2.34252	22.3575	22.5177	22.7694	20.3907	20.2982	19.9282
P09651	Homo sapiens (Human)	Heterogeneous nuclear ribonucleoprotein A1 (hnRNP A1) (Helix-destabilizing protein) (Single-strand RNA-binding protein) (hnRNP core protein A1) [Cleaved into: Heterogeneous nuclear ribonucleoprotein A1, N-terminally processed]	HNRNPA1 HNRPA1	NA	0	1	Acetyl (Protein N-term);Biotin (K)	0	1	3	3	NA	SKSESPKEPEQLRK	_(ac)SK(bi)SESPKEPEQLRK_;_(ac)SK(bi)SESPKEPEQLRK_;_(ac)SK(bi)SESPKEPEQLRK_;_(ac)SK(bi)SESPKEPEQLRK_;_(ac)SK(bi)SESPKEPEQLRK_;_(ac)SK(bi)SESPKEPEQLRK_;_(ac)SK(bi)SESPKEPEQLRK_	0.0032812	2.25494	2.34097	20.6407	20.3966	20.983	18.6383	17.6698	18.6893
PF3D7_0730800	Plasmodium falciparum 3D7	Plasmodium exported protein, unknown function	N/A	Previous IDs: MAL7P1.170;PF3D7_0730800.1;PF3D7_0730800.2	1	0	Biotin (K)	0	1	2	107	NA	SNLFSKYVNEDGTTKPNAPTAQSLTSIVK	_SNLFSK(bi)YVNEDGTTKPNAPTAQSLTSIVK_;_SNLFSK(bi)YVNEDGTTKPNAPTAQSLTSIVK_;_SNLFSK(bi)YVNEDGTTKPNAPTAQSLTSIVK_;_SNLFSK(bi)YVNEDGTTKPNAPTAQSLTSIVK_;_SNLFSK(bi)YVNEDGTTKPNAPTAQSLTSIVK_;_SNLFSK(bi)YVNEDGTTKPNAPTAQSLTSIVK_;_SNLFSK(bi)YVNEDGTTKPNAPTAQSLTSIVK_;_SNLFSK(bi)YVNEDGTTKPNAPTAQSLTSIVK_;_SNLFSK(bi)YVNEDGTTKPNAPTAQSLTSIVK_;_SNLFSK(bi)YVNEDGTTKPNAPTAQSLTSIVK_;_SNLFSK(bi)YVNEDGTTKPNAPTAQSLTSIVK_;_SN…	0.000658852	2.77686	2.34028	24.1488	24.7334	23.9811	21.9634	21.7904	22.0887
PF3D7_0424500	Plasmodium falciparum 3D7	serine/threonine protein kinase, FIKK family	FIKK4.1	Previous IDs: MAL4P1.228;PFD1165w	1	0	Biotin (K)	0	1	1	231	NA	LGKSILGK	_LGK(bi)SILGK_;_LGK(bi)SILGK_;_LGK(bi)SILGK_;_LGK(bi)SILGK_;_LGK(bi)SILGK_;_LGK(bi)SILGK_;_LGK(bi)SILGK_;_LGK(bi)SILGK_;_LGK(bi)SILGK_;_LGK(bi)SILGK_	0.0331806	1.39038	2.33534	21.8779	21.5782	22.1088	19.3504	20.8349	18.3736
PF3D7_0202000	Plasmodium falciparum 3D7	knob-associated histidine-rich protein	KAHRP	Previous IDs: PF02_0020;PFB0100c	1	0	Biotin (K);Oxidation (M);Phospho (STY)	1	1	2	623;617	598;603;616;599;600	GASTTAGSTTGATTGANAVQSKDETADKNAANNGEQVMSR	_GASTTAGSTTGATTGANAVQSKDETADK(bi)NAANNGEQVM(ox)SR_;_GASTTAGSTTGATTGANAVQSK(bi)DETADKNAANNGEQVM(ox)SR_;_GASTTAGSTTGATTGANAVQSK(bi)DETADKNAANNGEQVM(ox)SR_;_GASTTAGSTTGATTGANAVQSK(bi)DETADKNAANNGEQVM(ox)SR_;_GASTTAGSTTGATTGANAVQSK(bi)DETADKNAANNGEQVM(ox)SR_;_GASTTAGSTTGATTGANAVQSK(bi)DETADKNAANNGEQVM(ox)SR_;_GASTTAGSTTGATTGANAVQSK(bi)DETADKNAANNGEQVM(ox)SR_;_GASTTAGSTTGATTGANAVQSK(bi)DETADKNAANNGEQV…	0.0411175	1.30783	2.30725	20.4193	20.4577	22.4877	18.639	19.5236	18.2803
PF3D7_0202000	Plasmodium falciparum 3D7	knob-associated histidine-rich protein	KAHRP	Previous IDs: PF02_0020;PFB0100c	1	0	Biotin (K)	0	1	1	551;561;571	NA	EASTSKEATK	_EASTSK(bi)EATK_;_EASTSK(bi)EATK_;_EASTSK(bi)EATK_;_EASTSK(bi)EATK_;_EASTSK(bi)EATK_;_EASTSK(bi)EATK_	0.0232143	1.53081	2.30487	21.4235	20.8341	21.5448	17.7607	19.4328	19.6943
PF3D7_0201900	Plasmodium falciparum 3D7	erythrocyte membrane protein 3	EMP3	Previous IDs: PF02_0019;PFB0095c	1	0	Biotin (K)	0	1	2	1279	NA	ELLNKDISNKDMK	_ELLNK(bi)DISNKDMK_;_ELLNK(bi)DISNKDMK_;_ELLNK(bi)DISNKDMK_;_ELLNK(bi)DISNKDMK_;_ELLNK(bi)DISNKDMK_	0.00322001	2.26202	2.30178	21.3377	21.023	20.8575	18.2237	19.3833	18.7059
PF3D7_0201900	Plasmodium falciparum 3D7	erythrocyte membrane protein 3	EMP3	Previous IDs: PF02_0019;PFB0095c	1	0	Biotin (K)	0	1	2	1759;1837;2032;1751;1829;2024	NA	NAANKGQQNTGLKNTPNEGQQNTGLK	_NAANKGQQNTGLK(bi)NTPNEGQQNTGLK_;_NAANKGQQNTGLK(bi)NTPNEGQQNTGLK_;_NAANKGQQNTGLK(bi)NTPNEGQQNTGLK_;_NAANKGQQNTGLK(bi)NTPNEGQQNTGLK_;_NAANKGQQNTGLK(bi)NTPNEGQQNTGLK_;_NAANK(bi)GQQNTGLKNTPNEGQQNTGLK_	0.00440673	2.14616	2.29375	21.7823	21.2909	21.5054	19.0303	18.7183	19.9488
PF3D7_0532300	Plasmodium falciparum 3D7	Plasmodium exported protein (PHISTb), unknown function	N/A	Previous IDs: MAL5P1.314;PFE1600w	1	0	Biotin (K);Oxidation (M)	0	1	2	106	NA	SKCCDSISESNMVDRLK	_SK(bi)CCDSISESNMVDRLK_;_SK(bi)CCDSISESNMVDRLK_;_SK(bi)CCDSISESNMVDRLK_;_SK(bi)CCDSISESNMVDRLK_;_SK(bi)CCDSISESNMVDRLK_;_SK(bi)CCDSISESNMVDRLK_;_SK(bi)CCDSISESNM(ox)VDRLK_;_SK(bi)CCDSISESNM(ox)VDRLK_;_SK(bi)CCDSISESNM(ox)VDRLK_;_SK(bi)CCDSISESNM(ox)VDRLK_;_SK(bi)CCDSISESNM(ox)VDRLK_;_SK(bi)CCDSISESNM(ox)VDRLK_	0.00695916	1.97859	2.29008	21.8614	20.8923	22.2817	19.2643	19.7411	19.1597
P37840	Homo sapiens (Human)	Alpha-synuclein (Non-A beta component of AD amyloid) (Non-A4 component of amyloid precursor) (NACP)	SNCA NACP PARK1	NA	0	1	Acetyl (Protein N-term);Biotin (K)	0	1	1	6;10	NA	MDVFMKGLSK	_(ac)MDVFM(ox)K(bi)GLSK_;_(ac)M(ox)DVFMK(bi)GLSK_;_(ac)M(ox)DVFMKGLSK(bi)_;_(ac)MDVFM(ox)K(bi)GLSK_;_(ac)MDVFM(ox)K(bi)GLSK_;_(ac)M(ox)DVFMK(bi)GLSK_;_(ac)MDVFM(ox)K(bi)GLSK_;_(ac)MDVFM(ox)K(bi)GLSK_;_(ac)M(ox)DVFMK(bi)GLSK_;_(ac)MDVFM(ox)K(bi)GLSK_;_(ac)M(ox)DVFMK(bi)GLSK_;_(ac)MDVFM(ox)K(bi)GLSK_;_(ac)M(ox)DVFMK(bi)GLSK_;_(ac)MDVFM(ox)K(bi)GLSK_;_(ac)M(ox)DVFMK(bi)GLSK_;_(ac)M(ox)DVFMKGLSK(bi)_…	0.00325626	2.2577	2.28389	26.3348	26.4548	25.9137	24.368	24.1703	23.3133
PF3D7_1301400	Plasmodium falciparum 3D7	Plasmodium exported protein (hyp12), unknown function	HYP12	Previous IDs: PF13_0073	1	0	Biotin (K)	0	1	1	283	NA	NPKGDFHVLSNEEYENR	_NPK(bi)GDFHVLSNEEYENR_;_NPK(bi)GDFHVLSNEEYENR_;_NPK(bi)GDFHVLSNEEYENR_;_NPK(bi)GDFHVLSNEEYENR_;_NPK(bi)GDFHVLSNEEYENR_;_NPK(bi)GDFHVLSNEEYENR_;_NPK(bi)GDFHVLSNEEYENR_;_NPK(bi)GDFHVLSNEEYENR_;_NPK(bi)GDFHVLSNEEYENR_;_NPK(bi)GDFHVLSNEEYENR_;_NPK(bi)GDFHVLSNEEYENR_;_NPK(bi)GDFHVLSNEEYENR_;_NPK(bi)GDFHVLSNEEYENR_;_NPK(bi)GDFHVLSNEEYENR_;_NPK(bi)GDFHVLSNEEYENR_;_NPK(bi)GDFHVLSNEEYENR_;_NPK(bi)GDFHVLS…	0.000148485	3.18056	2.27267	24.5581	24.2092	24.258	22.2126	22.1623	21.8323
PF3D7_1001400	Plasmodium falciparum 3D7	exported lipase 1	XL1	Previous IDs: PF10_0018	1	0	Biotin (K)	0	1	1	551	NA	TLSYKNSWIEK	_TLSYK(bi)NSWIEK_;_TLSYK(bi)NSWIEK_;_TLSYK(bi)NSWIEK_;_TLSYK(bi)NSWIEK_;_TLSYK(bi)NSWIEK_;_TLSYK(bi)NSWIEK_;_TLSYK(bi)NSWIEK_;_TLSYK(bi)NSWIEK_;_TLSYK(bi)NSWIEK_;_TLSYK(bi)NSWIEK_;_TLSYK(bi)NSWIEK_	0.0300307	1.43011	2.27031	21.1435	21.3917	20.9361	17.535	19.5822	19.5432
PF3D7_1328500	Plasmodium falciparum 3D7	alpha/beta-hydrolase, putative	N/A	Previous IDs: PF13_0153	1	0	Biotin (K)	0	1	1	469	NA	TLSYKNSWIEK	_TLSYK(bi)NSWIEK_;_TLSYK(bi)NSWIEK_;_TLSYK(bi)NSWIEK_;_TLSYK(bi)NSWIEK_;_TLSYK(bi)NSWIEK_;_TLSYK(bi)NSWIEK_;_TLSYK(bi)NSWIEK_;_TLSYK(bi)NSWIEK_;_TLSYK(bi)NSWIEK_;_TLSYK(bi)NSWIEK_;_TLSYK(bi)NSWIEK_	0.0300307	1.43011	2.27031	21.1435	21.3917	20.9361	17.535	19.5822	19.5432
PF3D7_0401800	Plasmodium falciparum 3D7	Plasmodium exported protein (PHISTb), unknown function	PfD80	Previous IDs: MAL4P1.16;PFD0080c	1	0	Biotin (K)	0	1	3	355	NA	DAANYILKNLDLYDEHEAKKHASDR	_DAANYILK(bi)NLDLYDEHEAKKHASDR_;_DAANYILK(bi)NLDLYDEHEAKKHASDR_;_DAANYILK(bi)NLDLYDEHEAKKHASDR_;_DAANYILK(bi)NLDLYDEHEAKKHASDR_;_DAANYILK(bi)NLDLYDEHEAKKHASDR_;_DAANYILK(bi)NLDLYDEHEAKKHASDR_;_DAANYILK(bi)NLDLYDEHEAKKHASDR_;_DAANYILK(bi)NLDLYDEHEAKKHASDR_;_DAANYILK(bi)NLDLYDEHEAKKHASDR_;_DAANYILK(bi)NLDLYDEHEAKKHASDR_;_DAANYILK(bi)NLDLYDEHEAKKHASDR_;_DAANYILK(bi)NLDLYDEHEAKKHASDR_;_DAANYILK(bi)NL…	5.67024e-05	3.42614	2.26731	26.996	27.0708	26.6816	24.7283	24.6318	24.5863
PF3D7_1016300	Plasmodium falciparum 3D7	GBP130 protein	GBP130	Previous IDs: PF10_0159	1	0	2 Biotin (K)	0	2	3	148;149	NA	VVKKQINIGDTENQKEGK	_VVK(bi)K(bi)QINIGDTENQKEGK_;_VVK(bi)K(bi)QINIGDTENQKEGK_;_VVK(bi)K(bi)QINIGDTENQKEGK_;_VVK(bi)K(bi)QINIGDTENQKEGK_;_VVK(bi)K(bi)QINIGDTENQKEGK_;_VVK(bi)K(bi)QINIGDTENQKEGK_	0.00115137	2.59991	2.23952	22.1461	21.67	21.9766	19.7403	19.2689	20.065
PF3D7_1001000	Plasmodium falciparum 3D7	Plasmodium exported protein (hyp12), unknown function	PfJ13	Previous IDs: PF10_0013	1	0	Biotin (K)	0	1	2	84	NA	NNKNEDNHELQSKSR	_NNKNEDNHELQSK(bi)SR_;_NNKNEDNHELQSK(bi)SR_;_NNKNEDNHELQSK(bi)SR_;_NNKNEDNHELQSK(bi)SR_;_NNKNEDNHELQSK(bi)SR_;_NNKNEDNHELQSK(bi)SR_;_NNKNEDNHELQSK(bi)SR_;_NNKNEDNHELQSK(bi)SR_;_NNKNEDNHELQSK(bi)SR_;_NNKNEDNHELQSK(bi)SR_;_NNKNEDNHELQSK(bi)SR_;_NNKNEDNHELQSK(bi)SR_;_NNKNEDNHELQSK(bi)SR_;_NNKNEDNHELQSK(bi)SR_;_NNKNEDNHELQSK(bi)SR_;_NNKNEDNHELQSK(bi)SR_;_NNKNEDNHELQSK(bi)SR_;_NNKNEDNHELQSK(bi)SR_;_NN…	0.000296867	3.00714	2.23888	22.343	22.1176	22.4219	19.9299	20.3855	19.8504
P62826	Homo sapiens (Human)	GTP-binding nuclear protein Ran (Androgen receptor-associated protein 24) (GTPase Ran) (Ras-like protein TC4) (Ras-related nuclear protein)	RAN ARA24 OK/SW-cl.81	NA	0	1	Biotin (K)	0	1	2	23	NA	LVLVGDGGTGKTTFVKR	_LVLVGDGGTGK(bi)TTFVKR_;_LVLVGDGGTGK(bi)TTFVKR_;_LVLVGDGGTGK(bi)TTFVKR_;_LVLVGDGGTGK(bi)TTFVKR_;_LVLVGDGGTGK(bi)TTFVKR_;_LVLVGDGGTGK(bi)TTFVKR_;_LVLVGDGGTGK(bi)TTFVKR_	0.00686076	1.98429	2.23513	21.3475	21.621	22.766	19.7456	19.6666	19.617
PF3D7_0220100	Plasmodium falciparum 3D7	DnaJ protein, putative	N/A	Previous IDs: PF02_0188;PFB0920w	1	0	Biotin (K)	0	1	1	396	NA	KNLVESQIVGK	_K(bi)NLVESQIVGK_;_K(bi)NLVESQIVGK_;_K(bi)NLVESQIVGK_;_K(bi)NLVESQIVGK_;_K(bi)NLVESQIVGK_;_K(bi)NLVESQIVGK_;_K(bi)NLVESQIVGK_;_K(bi)NLVESQIVGK_	0.00904581	1.88382	2.21032	21.2682	20.9802	21.6772	19.2325	19.7498	18.3124
PF3D7_0936800	Plasmodium falciparum 3D7	Plasmodium exported protein (PHISTc), unknown function	N/A	Previous IDs: PFI1780w	1	0	Biotin (K)	0	1	1	360	NA	GQKQVSPK	_GQK(bi)QVSPK_;_GQK(bi)QVSPK_;_GQK(bi)QVSPK_;_GQK(bi)QVSPK_;_GQK(bi)QVSPK_;_GQK(bi)QVSPK_;_GQK(bi)QVSPK_;_GQK(bi)QVSPK_;_GQK(bi)QVSPK_;_GQK(bi)QVSPK_;_GQK(bi)QVSPK_;_GQK(bi)QVSPK_	0.00555865	2.06279	2.20843	22.5395	22.1714	23.0428	19.7628	20.8301	20.5356
P23763	Homo sapiens (Human)	Vesicle-associated membrane protein 1 (VAMP-1) (Synaptobrevin-1)	VAMP1 SYB1	NA	0	1	Biotin (K)	0	1	1	54	NA	VNVDKVLER	_VNVDK(bi)VLER_;_VNVDK(bi)VLER_;_VNVDK(bi)VLER_;_VNVDK(bi)VLER_;_VNVDK(bi)VLER_;_VNVDK(bi)VLER_	0.00397303	2.18428	2.20054	20.9601	20.6762	21.5789	18.3758	19.2261	19.0118
P63027	Homo sapiens (Human)	Vesicle-associated membrane protein 2 (VAMP-2) (Synaptobrevin-2)	VAMP2 SYB2	NA	0	1	Biotin (K)	0	1	1	52	NA	VNVDKVLER	_VNVDK(bi)VLER_;_VNVDK(bi)VLER_;_VNVDK(bi)VLER_;_VNVDK(bi)VLER_;_VNVDK(bi)VLER_;_VNVDK(bi)VLER_	0.00397303	2.18428	2.20054	20.9601	20.6762	21.5789	18.3758	19.2261	19.0118
Q15836	Homo sapiens (Human)	Vesicle-associated membrane protein 3 (VAMP-3) (Cellubrevin) (CEB) (Synaptobrevin-3)	VAMP3 SYB3	NA	0	1	Biotin (K)	0	1	1	35	NA	VNVDKVLER	_VNVDK(bi)VLER_;_VNVDK(bi)VLER_;_VNVDK(bi)VLER_;_VNVDK(bi)VLER_;_VNVDK(bi)VLER_;_VNVDK(bi)VLER_	0.00397303	2.18428	2.20054	20.9601	20.6762	21.5789	18.3758	19.2261	19.0118
PF3D7_0500800	Plasmodium falciparum 3D7	mature parasite-infected erythrocyte surface antigen	MESA	Previous IDs: MAL5P1.9;PFE0040c	1	0	Biotin (K)	0	1	2	799	NA	DKVIGQEIIVEEVKEEIEK	_DK(bi)VIGQEIIVEEVKEEIEK_;_DK(bi)VIGQEIIVEEVKEEIEK_;_DK(bi)VIGQEIIVEEVKEEIEK_;_DK(bi)VIGQEIIVEEVKEEIEK_;_DK(bi)VIGQEIIVEEVKEEIEK_;_DK(bi)VIGQEIIVEEVKEEIEK_	0.00157825	2.50015	2.19637	22.9934	23.9222	23.4578	21.2614	21.0813	21.4415
P28289	Homo sapiens (Human)	Tropomodulin-1 (Erythrocyte tropomodulin) (E-Tmod)	TMOD1 D9S57E TMOD	NA	0	1	Biotin (K)	0	1	1	354	NA	LADLTGPIIPKCR	_LADLTGPIIPK(bi)CR_;_LADLTGPIIPK(bi)CR_;_LADLTGPIIPK(bi)CR_;_LADLTGPIIPK(bi)CR_;_LADLTGPIIPK(bi)CR_;_LADLTGPIIPK(bi)CR_;_LADLTGPIIPK(bi)CR_;_LADLTGPIIPK(bi)CR_;_LADLTGPIIPK(bi)CR_;_LADLTGPIIPK(bi)CR_;_LADLTGPIIPK(bi)CR_;_LADLTGPIIPK(bi)CR_;_LADLTGPIIPK(bi)CR_;_LADLTGPIIPK(bi)CR_;_LADLTGPIIPK(bi)CR_;_LADLTGPIIPK(bi)CR_;_LADLTGPIIPK(bi)CR_;_LADLTGPIIPK(bi)CR_;_LADLTGPIIPK(bi)CR_;_LADLTGPIIPK(bi)CR_…	0.000308658	3.0037	2.1907	25.2483	25.2639	25.3031	23.2636	22.707	23.2727
PF3D7_0936800	Plasmodium falciparum 3D7	Plasmodium exported protein (PHISTc), unknown function	N/A	Previous IDs: PFI1780w	1	0	Biotin (K)	0	1	1	307;337;312;342	NA	VQPPKVQQQK	_VQPPK(bi)VQQQK_;_VQPPK(bi)VQQQK_;_VQPPK(bi)VQQQK_;_VQPPK(bi)VQQQK_;_VQPPK(bi)VQQQK_;_VQPPK(bi)VQQQK_;_VQPPKVQQQK(bi)_;_VQPPK(bi)VQQQK_;_VQPPK(bi)VQQQK_;_VQPPK(bi)VQQQK_;_VQPPK(bi)VQQQK_;_VQPPK(bi)VQQQK_;_VQPPK(bi)VQQQK_;_VQPPK(bi)VQQQK_;_VQPPK(bi)VQQQK_;_VQPPK(bi)VQQQK_;_VQPPK(bi)VQQQK_;_VQPPK(bi)VQQQK_	4.16301e-05	3.50234	2.18501	26.3128	26.2055	26.2591	23.8866	24.2617	24.0741
PF3D7_0201900	Plasmodium falciparum 3D7	erythrocyte membrane protein 3	EMP3	Previous IDs: PF02_0019;PFB0095c	1	0	Biotin (K)	0	1	2	567;570	NA	YQPTKGLKEYEESHVAK	_YQPTK(bi)GLKEYEESHVAK_;_YQPTKGLK(bi)EYEESHVAK_;_YQPTK(bi)GLKEYEESHVAK_;_YQPTK(bi)GLKEYEESHVAK_;_YQPTK(bi)GLKEYEESHVAK_;_YQPTK(bi)GLKEYEESHVAK_;_YQPTK(bi)GLKEYEESHVAK_;_YQPTK(bi)GLKEYEESHVAK_;_YQPTK(bi)GLKEYEESHVAK_	0.0224632	1.54403	2.18249	22.2673	22.2355	21.5441	19.7604	18.9089	20.8301
PF3D7_0500800	Plasmodium falciparum 3D7	mature parasite-infected erythrocyte surface antigen	MESA	Previous IDs: MAL5P1.9;PFE0040c	1	0	Biotin (K)	0	1	3	316;313	NA	IYEETKYNKITSEFRETENVK	_IYEETKYNK(bi)ITSEFRETENVK_;_IYEETKYNK(bi)ITSEFRETENVK_;_IYEETK(bi)YNKITSEFRETENVK_;_IYEETKYNK(bi)ITSEFRETENVK_;_IYEETK(bi)YNKITSEFRETENVK_;_IYEETK(bi)YNKITSEFRETENVK_;_IYEETKYNK(bi)ITSEFRETENVK_;_IYEETKYNK(bi)ITSEFRETENVK_;_IYEETKYNK(bi)ITSEFRETENVK_;_IYEETKYNK(bi)ITSEFRETENVK_;_IYEETKYNK(bi)ITSEFRETENVK_;_IYEETK(bi)YNKITSEFRETENVK_;_IYEETK(bi)YNKITSEFRETENVK_;_IYEETKYNK(bi)ITSEFRETENVK_;_IYEETK…	0.00618957	2.02309	2.17834	27.2835	25.9514	27.0086	24.7019	24.4426	24.564
PF3D7_0936800	Plasmodium falciparum 3D7	Plasmodium exported protein (PHISTc), unknown function	N/A	Previous IDs: PFI1780w	1	0	Biotin (K)	0	1	2	376	NA	GNNQAKPTKGNK	_GNNQAKPTK(bi)GNK_;_GNNQAKPTK(bi)GNK_;_GNNQAKPTK(bi)GNK_;_GNNQAKPTK(bi)GNK_;_GNNQAKPTK(bi)GNK_;_GNNQAKPTK(bi)GNK_;_GNNQAKPTK(bi)GNK_;_GNNQAKPTK(bi)GNK_;_GNNQAKPTK(bi)GNK_;_GNNQAKPTK(bi)GNK_;_GNNQAKPTK(bi)GNK_;_GNNQAKPTK(bi)GNK_;_GNNQAKPTK(bi)GNK_	0.00959321	1.86207	2.17598	21.7462	20.8424	22.0651	19.1619	19.9487	19.0151
PF3D7_0936800	Plasmodium falciparum 3D7	Plasmodium exported protein (PHISTc), unknown function	N/A	Previous IDs: PFI1780w	1	0	Biotin (K)	0	1	3	342;327;332	NA	VQPPKSQQQKVQPPKVQQQK	_VQPPKSQQQKVQPPKVQQQK(bi)_;_VQPPKSQQQKVQPPKVQQQK(bi)_;_VQPPKSQQQKVQPPKVQQQK(bi)_;_VQPPK(bi)SQQQKVQPPKVQQQK_;_VQPPK(bi)SQQQKVQPPKVQQQK_;_VQPPKSQQQK(bi)VQPPKVQQQK_;_VQPPK(bi)SQQQKVQPPKVQQQK_;_VQPPKSQQQK(bi)VQPPKVQQQK_;_VQPPKSQQQK(bi)VQPPKVQQQK_	0.00906373	1.88342	2.17316	21.3586	21.2675	22.1333	19.8562	18.6837	19.7001
PF3D7_0202000	Plasmodium falciparum 3D7	knob-associated histidine-rich protein	KAHRP	Previous IDs: PF02_0020;PFB0100c	1	0	2 Biotin (K)	0	2	2	517;520	NA	TQGGKTDKTGASTNAATNK	_TQGGK(bi)TDKTGASTNAATNK_;_TQGGKTDK(bi)TGASTNAATNK_;_TQGGK(bi)TDKTGASTNAATNK_;_TQGGKTDK(bi)TGASTNAATNK_;_TQGGK(bi)TDKTGASTNAATNK_;_TQGGKTDK(bi)TGASTNAATNK_;_TQGGKTDK(bi)TGASTNAATNK_;_TQGGK(bi)TDKTGASTNAATNK_;_TQGGKTDK(bi)TGASTNAATNK_;_TQGGK(bi)TDKTGASTNAATNK_;_TQGGKTDK(bi)TGASTNAATNK_;_TQGGKTDK(bi)TGASTNAATNK_;_TQGGKTDK(bi)TGASTNAATNK_;_TQGGKTDK(bi)TGASTNAATNK_;_TQGGKTDK(bi)TGASTNAATNK_;_TQGGKTDK…	0.00646561	2.00563	2.173	21.6334	22.1078	22.2432	20.5681	19.4855	19.4118
PF3D7_0500800	Plasmodium falciparum 3D7	mature parasite-infected erythrocyte surface antigen	MESA	Previous IDs: MAL5P1.9;PFE0040c	1	0	Biotin (K)	0	1	2	652;650	NA	QVEEGIKENDTEGNDKVK	_QVEEGIKENDTEGNDKVK(bi)_;_QVEEGIKENDTEGNDKVK(bi)_;_QVEEGIKENDTEGNDK(bi)VK_;_QVEEGIKENDTEGNDK(bi)VK_;_QVEEGIKENDTEGNDK(bi)VK_;_QVEEGIKENDTEGNDK(bi)VK_	0.00238795	2.36463	2.1715	20.9642	21.1909	21.0344	19.512	18.5695	18.5935
PF3D7_1354300	Plasmodium falciparum 3D7	large subunit rRNA methyltransferase, putative	N/A	Previous IDs: PF13_0286	1	0	Biotin (K)	0	1	1	583	NA	AMDFKNEELMK	_AMDFK(bi)NEELMK_;_AMDFK(bi)NEELMK_;_AMDFK(bi)NEELMK_;_AMDFK(bi)NEELMK_;_AMDFK(bi)NEELMK_;_AMDFK(bi)NEELMK_	0.00364977	2.21524	2.1621	21.2831	21.0299	20.7267	19.1699	19.1638	18.2197
Q13442	Homo sapiens (Human)	28 kDa heat- and acid-stable phosphoprotein (PDGF-associated protein) (PAP) (PDGFA-associated protein 1) (PAP1)	PDAP1 HASPP28	NA	0	1	Biotin (K)	0	1	1	132	NA	MHLAGKTEQAK	_MHLAGK(bi)TEQAK_;_MHLAGK(bi)TEQAK_;_MHLAGK(bi)TEQAK_;_MHLAGK(bi)TEQAK_;_MHLAGK(bi)TEQAK_;_MHLAGK(bi)TEQAK_;_MHLAGK(bi)TEQAK_	0.0800405	1.03971	2.15885	21.4065	21.4409	21.5336	18.9227	21.0587	17.923
P37840	Homo sapiens (Human)	Alpha-synuclein (Non-A beta component of AD amyloid) (Non-A4 component of amyloid precursor) (NACP)	SNCA NACP PARK1	NA	0	1	2 Biotin (K)	0	2	2	32;23	NA	TKQGVAEAAGKTK	_TKQGVAEAAGK(bi)TK_;_TKQGVAEAAGK(bi)TK_;_TKQGVAEAAGK(bi)TK_;_TKQGVAEAAGK(bi)TK_;_TKQGVAEAAGK(bi)TK_;_TKQGVAEAAGK(bi)TK_;_TKQGVAEAAGK(bi)TK_;_TKQGVAEAAGK(bi)TK_;_TKQGVAEAAGK(bi)TK_;_TKQGVAEAAGK(bi)TK_;_TKQGVAEAAGK(bi)TK_;_TKQGVAEAAGK(bi)TK_;_TKQGVAEAAGK(bi)TK_;_TKQGVAEAAGK(bi)TK_;_TKQGVAEAAGK(bi)TK_;_TKQGVAEAAGK(bi)TK_;_TKQGVAEAAGK(bi)TK_;_TKQGVAEAAGK(bi)TK_;_TKQGVAEAAGK(bi)TK_;_TKQGVAEAAGK(bi)TK_…	0.00585177	2.04277	2.14989	21.0645	20.9874	20.7329	18.1272	19.471	18.7369
PF3D7_0201900	Plasmodium falciparum 3D7	erythrocyte membrane protein 3	EMP3	Previous IDs: PF02_0019;PFB0095c	1	0	Biotin (K)	0	1	1	1525;1590	NA	QQNTGLKNTASK	_QQNTGLK(bi)NTASK_;_QQNTGLK(bi)NTASK_;_QQNTGLK(bi)NTASK_;_QQNTGLK(bi)NTASK_;_QQNTGLK(bi)NTASK_;_QQNTGLK(bi)NTASK_;_QQNTGLK(bi)NTASK_;_QQNTGLK(bi)NTASK_;_QQNTGLK(bi)NTASK_	0.018912	1.61003	2.1491	21.9495	21.4075	22.4084	20.1636	20.3441	18.8104
P37840	Homo sapiens (Human)	Alpha-synuclein (Non-A beta component of AD amyloid) (Non-A4 component of amyloid precursor) (NACP)	SNCA NACP PARK1	NA	0	1	Biotin (K)	0	1	2	21;12	NA	AKEGVVAAAEKTK	_AKEGVVAAAEK(bi)TK_;_AK(bi)EGVVAAAEKTK_;_AKEGVVAAAEK(bi)TK_;_AK(bi)EGVVAAAEKTK_;_AKEGVVAAAEK(bi)TK_;_AK(bi)EGVVAAAEKTK_;_AKEGVVAAAEK(bi)TK_;_AKEGVVAAAEK(bi)TK_;_AK(bi)EGVVAAAEKTK_;_AKEGVVAAAEK(bi)TK_	0.0979884	0.954424	2.14429	21.6499	21.6658	21.0432	18.1149	21.2433	18.5678
PF3D7_1478600	Plasmodium falciparum 3D7	EMP1-trafficking protein	PTP3	Previous IDs: PF14_0758	1	0	Biotin (K)	0	1	2	218	NA	IDNLSNKPTDLRR	_IDNLSNK(bi)PTDLRR_;_IDNLSNK(bi)PTDLRR_;_IDNLSNK(bi)PTDLRR_;_IDNLSNK(bi)PTDLRR_;_IDNLSNK(bi)PTDLRR_;_IDNLSNK(bi)PTDLRR_;_IDNLSNK(bi)PTDLRR_;_IDNLSNK(bi)PTDLRR_;_IDNLSNK(bi)PTDLRR_;_IDNLSNK(bi)PTDLRR_	0.00101134	2.63673	2.14419	22.0576	21.7056	21.8611	19.5586	19.4507	20.1824
P23588	Homo sapiens (Human)	Eukaryotic translation initiation factor 4B (eIF-4B)	EIF4B	NA	0	1	Biotin (K)	0	1	1	395	NA	QLDEPKLER	_QLDEPK(bi)LER_;_QLDEPK(bi)LER_;_QLDEPK(bi)LER_;_QLDEPK(bi)LER_;_QLDEPK(bi)LER_	0.0710601	1.08769	2.14099	20.9099	20.4451	20.6866	19.9206	16.9426	18.7554
PF3D7_0936800	Plasmodium falciparum 3D7	Plasmodium exported protein (PHISTc), unknown function	N/A	Previous IDs: PFI1780w	1	0	Biotin (K)	0	1	3	322;332;317	NA	VQPPKSQQQKVQPPKSQQQK	_VQPPKSQQQK(bi)VQPPKSQQQK_;_VQPPKSQQQK(bi)VQPPKSQQQK_;_VQPPKSQQQKVQPPKSQQQK(bi)_;_VQPPKSQQQK(bi)VQPPKSQQQK_;_VQPPK(bi)SQQQKVQPPKSQQQK_;_VQPPKSQQQK(bi)VQPPKSQQQK_;_VQPPK(bi)SQQQKVQPPKSQQQK_	0.016273	1.66424	2.13622	20.5362	20.1283	21.1664	19.3017	17.7902	18.3303
Q9Y570	Homo sapiens (Human)	Protein phosphatase methylesterase 1 (PME-1) (EC 3.1.1.89)	PPME1 PME1 PP2593 PRO0750	NA	0	1	Acetyl (Protein N-term);Biotin (K);Oxidation (M)	0	1	1	6	NA	SALEKSMHLGR	_(ac)SALEK(bi)SMHLGR_;_(ac)SALEK(bi)SMHLGR_;_(ac)SALEK(bi)SMHLGR_;_(ac)SALEK(bi)SMHLGR_;_(ac)SALEK(bi)SMHLGR_;_(ac)SALEK(bi)SMHLGR_;_(ac)SALEK(bi)SMHLGR_;_(ac)SALEK(bi)SMHLGR_;_(ac)SALEK(bi)SMHLGR_;_(ac)SALEK(bi)SMHLGR_;_(ac)SALEK(bi)SMHLGR_;_(ac)SALEK(bi)SMHLGR_;_(ac)SALEK(bi)SMHLGR_;_(ac)SALEK(bi)SMHLGR_;_(ac)SALEK(bi)SM(ox)HLGR_;_(ac)SALEK(bi)SM(ox)HLGR_;_(ac)SALEK(bi)SM(ox)HLGR_;_(ac)SALEK(bi…	0.0187898	1.61243	2.11521	20.2528	20.825	21.5831	19.1151	19.2217	17.9785
P48426	Homo sapiens (Human)	Phosphatidylinositol 5-phosphate 4-kinase type-2 alpha (EC 2.7.1.149) (1-phosphatidylinositol 5-phosphate 4-kinase 2-alpha) (Diphosphoinositide kinase 2-alpha) (PIP5KIII) (Phosphatidylinositol 5-Phosphate 4-Kinase) (PI5P4Kalpha) (Phosphatidylinositol 5-phosphate 4-kinase type II alpha) (PI(5)P 4-kinase type II alpha) (PIP4KII-alpha) (PtdIns(4)P-5-kinase B isoform) (PtdIns(4)P-5-kinase C isoform) …	PIP4K2A PI5P4KA PIP5K2 PIP5K2A	NA	0	1	Biotin (K)	0	1	1	378	NA	TVKHGAGAEISTVNPEQYSK	_TVK(bi)HGAGAEISTVNPEQYSK_;_TVK(bi)HGAGAEISTVNPEQYSK_;_TVK(bi)HGAGAEISTVNPEQYSK_;_TVK(bi)HGAGAEISTVNPEQYSK_;_TVK(bi)HGAGAEISTVNPEQYSK_;_TVK(bi)HGAGAEISTVNPEQYSK_;_TVK(bi)HGAGAEISTVNPEQYSK_;_TVK(bi)HGAGAEISTVNPEQYSK_;_TVK(bi)HGAGAEISTVNPEQYSK_;_TVK(bi)HGAGAEISTVNPEQYSK_;_TVK(bi)HGAGAEISTVNPEQYSK_;_TVK(bi)HGAGAEISTVNPEQYSK_;_TVK(bi)HGAGAEISTVNPEQYSK_	6.92083e-06	3.89467	2.11303	22.683	22.7491	22.5352	20.5921	20.4933	20.5427
P78356	Homo sapiens (Human)	Phosphatidylinositol 5-phosphate 4-kinase type-2 beta (EC 2.7.1.149) (1-phosphatidylinositol 5-phosphate 4-kinase 2-beta) (Diphosphoinositide kinase 2-beta) (Phosphatidylinositol 5-phosphate 4-kinase type II beta) (PI(5)P 4-kinase type II beta) (PIP4KII-beta) (PtdIns(5)P-4-kinase isoform 2-beta)	PIP4K2B PIP5K2B	NA	0	1	Biotin (K)	0	1	1	388	NA	TVKHGAGAEISTVNPEQYSK	_TVK(bi)HGAGAEISTVNPEQYSK_;_TVK(bi)HGAGAEISTVNPEQYSK_;_TVK(bi)HGAGAEISTVNPEQYSK_;_TVK(bi)HGAGAEISTVNPEQYSK_;_TVK(bi)HGAGAEISTVNPEQYSK_;_TVK(bi)HGAGAEISTVNPEQYSK_;_TVK(bi)HGAGAEISTVNPEQYSK_;_TVK(bi)HGAGAEISTVNPEQYSK_;_TVK(bi)HGAGAEISTVNPEQYSK_;_TVK(bi)HGAGAEISTVNPEQYSK_;_TVK(bi)HGAGAEISTVNPEQYSK_;_TVK(bi)HGAGAEISTVNPEQYSK_;_TVK(bi)HGAGAEISTVNPEQYSK_	6.92083e-06	3.89467	2.11303	22.683	22.7491	22.5352	20.5921	20.4933	20.5427
PF3D7_0202000	Plasmodium falciparum 3D7	knob-associated histidine-rich protein	KAHRP	Previous IDs: PF02_0020;PFB0100c	1	0	2 Phospho (STY);Biotin (K)	2	1	3	354;359;351;364	345;347;348	YSSFSSVNKYGKHGDEKHHSSK	_YSSFSSVNKYGK(bi)HGDEKHHSSK_;_YSSFSSVNKYGK(bi)HGDEKHHSSK_;_YSSFSSVNKYGK(bi)HGDEKHHSSK_;_YSSFSSVNKYGK(bi)HGDEKHHSSK_;_YSSFSSVNKYGK(bi)HGDEKHHSSK_;_YSSFSSVNKYGK(bi)HGDEKHHSSK_;_YSSFSSVNKYGK(bi)HGDEKHHSSK_;_YSSFSSVNKYGK(bi)HGDEKHHSSK_;_YSSFSSVNKYGK(bi)HGDEKHHSSK_;_YSSFSSVNKYGKHGDEK(bi)HHSSK_;_YSSFSSVNKYGK(bi)HGDEKHHSSK_;_YSSFSSVNKYGK(bi)HGDEKHHSSK_;_YSSFSSVNKYGK(bi)HGDEKHHSSK_;_YSSFSSVNKYGK(bi)HGDEK…	0.0018678	2.44628	2.11234	24.721	24.4166	24.4999	22.7006	22.7155	21.8845
PF3D7_1371900	Plasmodium falciparum 3D7	Plasmodium exported protein, unknown function	N/A	Previous IDs: MAL13P1.465	1	0	Biotin (K)	0	1	1	71	NA	INALTELKNYK	_INALTELK(bi)NYK_;_INALTELK(bi)NYK_;_INALTELK(bi)NYK_;_INALTELK(bi)NYK_;_INALTELK(bi)NYK_;_INALTELK(bi)NYK_;_INALTELK(bi)NYK_;_INALTELK(bi)NYK_;_INALTELK(bi)NYK_;_INALTELK(bi)NYK_;_INALTELK(bi)NYK_;_INALTELK(bi)NYK_;_INALTELK(bi)NYK_;_INALTELK(bi)NYK_	0.00197614	2.42646	2.10798	23.825	23.039	22.9667	21.3444	21.1689	20.9934
P11171	Homo sapiens (Human)	Protein 4.1 (P4.1) (4.1R) (Band 4.1) (EPB4.1) (Erythrocyte membrane protein band 4.1)	EPB41 E41P	NA	0	1	Biotin (K)	0	1	2	747;753	NA	TQTVTISDNANAVKSEIPTKDVPIVHTETK	_TQTVTISDNANAVK(bi)SEIPTKDVPIVHTETK_;_TQTVTISDNANAVKSEIPTK(bi)DVPIVHTETK_;_TQTVTISDNANAVKSEIPTK(bi)DVPIVHTETK_;_TQTVTISDNANAVK(bi)SEIPTKDVPIVHTETK_;_TQTVTISDNANAVK(bi)SEIPTKDVPIVHTETK_;_TQTVTISDNANAVKSEIPTK(bi)DVPIVHTETK_;_TQTVTISDNANAVKSEIPTK(bi)DVPIVHTETK_;_TQTVTISDNANAVKSEIPTK(bi)DVPIVHTETK_;_TQTVTISDNANAVK(bi)SEIPTKDVPIVHTETK_;_TQTVTISDNANAVKSEIPTK(bi)DVPIVHTETK_;_TQTVTISDNANAVKSEIPTK(bi)DVPI…	0.0995218	0.948414	2.09728	26.4995	26.7256	24.4999	22.4657	24.6676	24.2999
PF3D7_0936800	Plasmodium falciparum 3D7	Plasmodium exported protein (PHISTc), unknown function	N/A	Previous IDs: PFI1780w	1	0	Biotin (K)	0	1	3	342	NA	VQQQKVQPPKVQKPK	_VQQQK(bi)VQPPKVQKPK_;_VQQQK(bi)VQPPKVQKPK_;_VQQQK(bi)VQPPKVQKPK_;_VQQQK(bi)VQPPKVQKPK_;_VQQQK(bi)VQPPKVQKPK_;_VQQQK(bi)VQPPKVQKPK_;_VQQQK(bi)VQPPKVQKPK_;_VQQQK(bi)VQPPKVQKPK_;_VQQQK(bi)VQPPKVQKPK_;_VQQQK(bi)VQPPKVQKPK_;_VQQQK(bi)VQPPKVQKPK_;_VQQQK(bi)VQPPKVQKPK_;_VQQQK(bi)VQPPKVQKPK_;_VQQQK(bi)VQPPKVQKPK_;_VQQQK(bi)VQPPKVQKPK_;_VQQQK(bi)VQPPKVQKPK_;_VQQQK(bi)VQPPKVQKPK_;_VQQQK(bi)VQPPKVQKPK_;_VQ…	0.000106277	3.27717	2.09699	21.9243	21.5146	21.8699	19.6046	19.7642	19.6491
PF3D7_0731600	Plasmodium falciparum 3D7	acyl-CoA synthetase	ACS5	Previous IDs: PF07_0129	1	0	Biotin (K)	0	1	2	775;780	NA	NAVQQSKLRPTK	_NAVQQSK(bi)LRPTK_;_NAVQQSK(bi)LRPTK_;_NAVQQSKLRPTK(bi)_;_NAVQQSK(bi)LRPTK_;_NAVQQSK(bi)LRPTK_	0.00541975	2.07125	2.09306	21.1695	20.9594	20.7518	18.516	19.5927	18.4928
PF3D7_0401800	Plasmodium falciparum 3D7	Plasmodium exported protein (PHISTb), unknown function	PfD80	Previous IDs: MAL4P1.16;PFD0080c	1	0	Biotin (K)	0	1	1	378	NA	TFSKELSK	_TFSK(bi)ELSK_;_TFSK(bi)ELSK_;_TFSK(bi)ELSK_;_TFSK(bi)ELSK_;_TFSK(bi)ELSK_;_TFSK(bi)ELSK_	0.0452655	1.26956	2.09237	22.0092	21.7718	20.0954	18.788	20.0175	18.7938
P00918	Homo sapiens (Human)	Carbonic anhydrase 2 (EC 4.2.1.1) (Carbonate dehydratase II) (Carbonic anhydrase C) (CAC) (Carbonic anhydrase II) (CA-II)	CA2	NA	0	1	Biotin (K)	0	1	1	171	NA	GKSADFTNFDPR	_GK(bi)SADFTNFDPR_;_GK(bi)SADFTNFDPR_;_GK(bi)SADFTNFDPR_;_GK(bi)SADFTNFDPR_;_GK(bi)SADFTNFDPR_;_GK(bi)SADFTNFDPR_;_GK(bi)SADFTNFDPR_;_GK(bi)SADFTNFDPR_;_GK(bi)SADFTNFDPR_;_GK(bi)SADFTNFDPR_;_GK(bi)SADFTNFDPR_;_GK(bi)SADFTNFDPR_	0.0081798	1.92047	2.08994	23.844	22.6774	22.9566	20.6171	21.4582	21.1328
PF3D7_0201900	Plasmodium falciparum 3D7	erythrocyte membrane protein 3	EMP3	Previous IDs: PF02_0019;PFB0095c	1	0	Biotin (K)	0	1	2	229	NA	EFIKQHLKDYEER	_EFIKQHLK(bi)DYEER_;_EFIKQHLK(bi)DYEER_;_EFIKQHLK(bi)DYEER_;_EFIKQHLK(bi)DYEER_	0.00852336	1.90637	2.08779	21.1703	20.9423	20.5417	18.1082	18.816	19.4667
PF3D7_0731600	Plasmodium falciparum 3D7	acyl-CoA synthetase	ACS5	Previous IDs: PF07_0129	1	0	Biotin (K)	0	1	1	768	NA	DIHTKNAVQQSK	_DIHTK(bi)NAVQQSK_;_DIHTK(bi)NAVQQSK_;_DIHTK(bi)NAVQQSK_;_DIHTK(bi)NAVQQSK_;_DIHTK(bi)NAVQQSK_	0.00174907	2.46955	2.06737	20.7682	20.223	20.3722	18.0649	18.8218	18.2747
PF3D7_0113000	Plasmodium falciparum 3D7	glutamic acid-rich protein GARP	GARP	Previous IDs: MAL1P3.06;PFA0620c	1	0	Biotin (K)	0	1	2	175	NA	EENSEVMSLYKTGQHKPK	_EENSEVMSLYK(bi)TGQHKPK_;_EENSEVMSLYK(bi)TGQHKPK_;_EENSEVMSLYK(bi)TGQHKPK_;_EENSEVMSLYK(bi)TGQHKPK_;_EENSEVMSLYK(bi)TGQHKPK_;_EENSEVMSLYK(bi)TGQHKPK_;_EENSEVMSLYK(bi)TGQHKPK_;_EENSEVMSLYK(bi)TGQHKPK_;_EENSEVMSLYK(bi)TGQHKPK_;_EENSEVMSLYK(bi)TGQHKPK_;_EENSEVMSLYK(bi)TGQHKPK_;_EENSEVMSLYK(bi)TGQHKPK_;_EENSEVMSLYK(bi)TGQHKPK_;_EENSEVMSLYK(bi)TGQHKPK_;_EENSEVMSLYK(bi)TGQHKPK_;_EENSEVMSLYK(bi)TGQHKPK_…	0.000663003	2.77583	2.06089	23.9441	23.6861	23.6265	21.3081	21.8712	21.8947
P61326	Homo sapiens (Human)	Protein mago nashi homolog	MAGOH MAGOHA	NA	0	1	Biotin (K)	0	1	2	41	NA	YANNSNYKNDVMIRK	_YANNSNYK(bi)NDVMIRK_;_YANNSNYK(bi)NDVMIRK_;_YANNSNYK(bi)NDVMIRK_;_YANNSNYK(bi)NDVMIRK_;_YANNSNYK(bi)NDVMIRK_;_YANNSNYK(bi)NDVMIRK_	0.00147978	2.52206	2.06038	21.2568	20.6267	21.285	19.3041	18.8759	18.8074
Q96A72	Homo sapiens (Human)	Protein mago nashi homolog 2	MAGOHB MAGOH2	NA	0	1	Biotin (K)	0	1	2	43	NA	YANNSNYKNDVMIRK	_YANNSNYK(bi)NDVMIRK_;_YANNSNYK(bi)NDVMIRK_;_YANNSNYK(bi)NDVMIRK_;_YANNSNYK(bi)NDVMIRK_;_YANNSNYK(bi)NDVMIRK_;_YANNSNYK(bi)NDVMIRK_	0.00147978	2.52206	2.06038	21.2568	20.6267	21.285	19.3041	18.8759	18.8074
PF3D7_1200700	Plasmodium falciparum 3D7	acyl-CoA synthetase	ACS7	Previous IDs: 2277.t00007;MAL12P1.7;PFL0035c	1	0	Biotin (K)	0	1	2	888;884	NA	KSAEKPIGK	_KSAEK(bi)PIGK_;_K(bi)SAEKPIGK_;_KSAEK(bi)PIGK_;_K(bi)SAEKPIGK_;_K(bi)SAEKPIGK_;_K(bi)SAEKPIGK_;_K(bi)SAEKPIGK_;_K(bi)SAEKPIGK_;_KSAEK(bi)PIGK_;_K(bi)SAEKPIGK_;_KSAEK(bi)PIGK_;_K(bi)SAEKPIGK_;_KSAEK(bi)PIGK_;_KSAEK(bi)PIGK_;_K(bi)SAEKPIGK_	0.0181706	1.62403	2.05354	21.9229	21.294	21.97	18.7937	20.4688	19.7638
PF3D7_0500800	Plasmodium falciparum 3D7	mature parasite-infected erythrocyte surface antigen	MESA	Previous IDs: MAL5P1.9;PFE0040c	1	0	Biotin (K)	0	1	1	313	NA	IYEETKYNK	_IYEETK(bi)YNK_;_IYEETK(bi)YNK_;_IYEETK(bi)YNK_;_IYEETK(bi)YNK_;_IYEETK(bi)YNK_;_IYEETK(bi)YNK_;_IYEETK(bi)YNK_;_IYEETK(bi)YNK_;_IYEETK(bi)YNK_;_IYEETK(bi)YNK_;_IYEETK(bi)YNK_;_IYEETK(bi)YNK_;_IYEETK(bi)YNK_;_IYEETK(bi)YNK_;_IYEETK(bi)YNK_;_IYEETK(bi)YNK_;_IYEETK(bi)YNK_;_IYEETK(bi)YNK_;_IYEETK(bi)YNK_;_IYEETK(bi)YNK_;_IYEETK(bi)YNK_;_IYEETK(bi)YNK_;_IYEETK(bi)YNK_;_IYEETK(bi)YNK_;_IYEETK(bi)YNK_…	1.0496e-05	3.82463	2.04383	24.7714	24.8761	24.9742	22.765	22.8062	22.9191
PF3D7_1477500	Plasmodium falciparum 3D7	Plasmodium exported protein (PHISTb), unknown function	N/A	Previous IDs: PF14_0746	1	0	Biotin (K)	0	1	2	393	NA	DQELIKNTEKEIR	_DQELIKNTEK(bi)EIR_;_DQELIKNTEK(bi)EIR_;_DQELIKNTEK(bi)EIR_;_DQELIKNTEK(bi)EIR_;_DQELIKNTEK(bi)EIR_	0.00996885	1.84765	2.04189	21.3293	20.4179	21.1558	19.3878	19.136	18.2536
PF3D7_1039000	Plasmodium falciparum 3D7	serine/threonine protein kinase, FIKK family	FIKK10.2	Previous IDs: PF10_0380	1	0	Biotin (K)	0	1	2	251	NA	DKGIYYKNNLGNEK	_DKGIYYK(bi)NNLGNEK_;_DKGIYYK(bi)NNLGNEK_;_DKGIYYK(bi)NNLGNEK_;_DKGIYYK(bi)NNLGNEK_;_DKGIYYK(bi)NNLGNEK_;_DKGIYYK(bi)NNLGNEK_;_DKGIYYK(bi)NNLGNEK_	0.0108067	1.81719	2.03568	21.5292	21.2421	21.3587	18.5748	19.334	20.1143
PF3D7_0500800	Plasmodium falciparum 3D7	mature parasite-infected erythrocyte surface antigen	MESA	Previous IDs: MAL5P1.9;PFE0040c	1	0	Biotin (K)	0	1	3	584;586	NA	KGIKENDTEGNDKVK	_KGIKENDTEGNDK(bi)VK_;_KGIKENDTEGNDK(bi)VK_;_KGIKENDTEGNDK(bi)VK_;_KGIKENDTEGNDK(bi)VK_;_KGIKENDTEGNDK(bi)VK_;_KGIKENDTEGNDK(bi)VK_;_KGIKENDTEGNDK(bi)VK_;_KGIKENDTEGNDK(bi)VK_;_KGIKENDTEGNDKVK(bi)_;_KGIKENDTEGNDK(bi)VK_;_KGIKENDTEGNDK(bi)VK_;_KGIKENDTEGNDK(bi)VK_;_KGIKENDTEGNDK(bi)VK_;_KGIKENDTEGNDK(bi)VK_;_KGIKENDTEGNDK(bi)VK_;_KGIKENDTEGNDK(bi)VK_;_KGIKENDTEGNDK(bi)VK_;_KGIKENDTEGNDK(bi)VK_;_KG…	0.000522517	2.84787	2.03325	22.8237	22.9559	23.093	20.9503	21.2288	20.5938
PF3D7_0424700	Plasmodium falciparum 3D7	serine/threonine protein kinase, FIKK family	FIKK4.2	Previous IDs: MAL4P1.230;PFD1175w	1	0	Biotin (K)	0	1	1	281	NA	FKSIPTVGFSK	_FK(bi)SIPTVGFSK_;_FK(bi)SIPTVGFSK_;_FK(bi)SIPTVGFSK_;_FK(bi)SIPTVGFSK_;_FK(bi)SIPTVGFSK_;_FK(bi)SIPTVGFSK_	0.0121036	1.77476	2.03108	21.2326	21.3542	21.2597	20.1708	18.9088	18.6736
PF3D7_0114500	Plasmodium falciparum 3D7	Plasmodium exported protein (hyp10), unknown function	N/A	Previous IDs: MAL1P4.16d;PFA0700c	1	0	Biotin (K)	0	1	2	58;61	NA	SHILKTHKGENSMAQPIVNK	_SHILK(bi)THKGENSMAQPIVNK_;_SHILK(bi)THKGENSMAQPIVNK_;_SHILK(bi)THKGENSMAQPIVNK_;_SHILK(bi)THKGENSMAQPIVNK_;_SHILKTHK(bi)GENSMAQPIVNK_;_SHILK(bi)THKGENSMAQPIVNK_	0.003207	2.26322	2.02292	20.8377	20.6476	20.6889	18.098	18.8489	19.1585
PF3D7_0202000	Plasmodium falciparum 3D7	knob-associated histidine-rich protein	KAHRP	Previous IDs: PF02_0020;PFB0100c	1	0	Biotin (K);Phospho (STY)	1	1	2	581;575;585	579;578	EATKEASTSKGATK	_EATKEASTSK(bi)GATK_;_EATKEASTSK(bi)GATK_;_EATKEASTSK(bi)GATK_;_EATKEASTSK(bi)GATK_;_EATKEASTSK(bi)GATK_;_EATKEASTSK(bi)GATK_;_EATKEASTSK(bi)GATK_;_EATKEASTSK(bi)GATK_;_EATKEASTSK(bi)GATK_;_EATKEASTSK(bi)GATK_;_EATKEASTSK(bi)GATK_;_EATKEASTSK(bi)GATK_;_EATKEAST(ph)SK(bi)GATK_;_EATKEAS(ph)TSK(bi)GATK_;_EATKEAS(ph)TSK(bi)GATK_;_EATKEAS(ph)TSK(bi)GATK_;_EATKEAS(ph)TSK(bi)GATK_;_EATKEAS(ph)TSK(bi)GAT…	0.0464273	1.25932	2.02013	19.5595	20.8874	21.4673	19.2969	17.8249	18.732
PF3D7_0201900	Plasmodium falciparum 3D7	erythrocyte membrane protein 3	EMP3	Previous IDs: PF02_0019;PFB0095c	1	0	Biotin (K)	0	1	2	1139;1158;1177;1196;1215;1234	NA	GSEGLKENAELKNK	_GSEGLKENAELK(bi)NK_;_GSEGLKENAELK(bi)NK_;_GSEGLKENAELK(bi)NK_;_GSEGLKENAELK(bi)NK_;_GSEGLKENAELK(bi)NK_;_GSEGLKENAELK(bi)NK_	0.0160968	1.66768	2.01914	21.0928	21.5573	20.9991	18.3153	19.3371	19.9395
P11171	Homo sapiens (Human)	Protein 4.1 (P4.1) (4.1R) (Band 4.1) (EPB4.1) (Erythrocyte membrane protein band 4.1)	EPB41 E41P	NA	0	1	Biotin (K)	0	1	1	639	NA	LAEKTEDLIR	_LAEK(bi)TEDLIR_;_LAEK(bi)TEDLIR_;_LAEK(bi)TEDLIR_;_LAEK(bi)TEDLIR_;_LAEK(bi)TEDLIR_;_LAEK(bi)TEDLIR_	0.0283098	1.45091	2.01908	20.7571	20.5017	21.0866	19.9129	18.2606	18.1147
PF3D7_0936800	Plasmodium falciparum 3D7	Plasmodium exported protein (PHISTc), unknown function	N/A	Previous IDs: PFI1780w	1	0	Biotin (K)	0	1	2	332	NA	SQQQKVQPPKVQQQK	_SQQQK(bi)VQPPKVQQQK_;_SQQQK(bi)VQPPKVQQQK_;_SQQQK(bi)VQPPKVQQQK_;_SQQQK(bi)VQPPKVQQQK_;_SQQQK(bi)VQPPKVQQQK_;_SQQQK(bi)VQPPKVQQQK_	0.0213293	1.56405	2.01895	21.2603	21.0898	21.4731	20.2474	19.1219	18.397
PF3D7_1401200	Plasmodium falciparum 3D7	Plasmodium exported protein, unknown function	N/A	Previous IDs: PF14_0014	1	0	Biotin (K);Oxidation (M)	0	1	1	136	NA	MPSKYDYLR	_MPSK(bi)YDYLR_;_MPSK(bi)YDYLR_;_MPSK(bi)YDYLR_;_MPSK(bi)YDYLR_;_MPSK(bi)YDYLR_;_MPSK(bi)YDYLR_;_MPSK(bi)YDYLR_;_MPSK(bi)YDYLR_;_MPSK(bi)YDYLR_;_MPSK(bi)YDYLR_;_MPSK(bi)YDYLR_;_MPSK(bi)YDYLR_;_MPSK(bi)YDYLR_;_M(ox)PSK(bi)YDYLR_;_M(ox)PSK(bi)YDYLR_;_M(ox)PSK(bi)YDYLR_;_M(ox)PSK(bi)YDYLR_;_M(ox)PSK(bi)YDYLR_;_M(ox)PSK(bi)YDYLR_;_M(ox)PSK(bi)YDYLR_;_M(ox)PSK(bi)YDYLR_;_M(ox)PSK(bi)YDYLR_;_M(ox)PSK(b…	0.00223435	2.38523	1.99903	22.6688	23.036	23.4032	21.4214	20.8833	20.8062
PF3D7_0500800	Plasmodium falciparum 3D7	mature parasite-infected erythrocyte surface antigen	MESA	Previous IDs: MAL5P1.9;PFE0040c	1	0	Biotin (K)	0	1	3	764	NA	GNKENILEIKDIVIGQEVIIEEVKK	_GNKENILEIK(bi)DIVIGQEVIIEEVKK_;_GNKENILEIK(bi)DIVIGQEVIIEEVKK_;_GNKENILEIK(bi)DIVIGQEVIIEEVKK_;_GNKENILEIK(bi)DIVIGQEVIIEEVKK_;_GNKENILEIK(bi)DIVIGQEVIIEEVKK_;_GNKENILEIK(bi)DIVIGQEVIIEEVKK_;_GNKENILEIK(bi)DIVIGQEVIIEEVKK_;_GNKENILEIK(bi)DIVIGQEVIIEEVKK_;_GNKENILEIK(bi)DIVIGQEVIIEEVKK_;_GNKENILEIK(bi)DIVIGQEVIIEEVKK_;_GNKENILEIK(bi)DIVIGQEVIIEEVKK_;_GNKENILEIK(bi)DIVIGQEVIIEEVKK_;_GNKENILEIK(bi)…	0.0121631	1.77308	1.98889	28.0684	28.9227	27.41	26.3115	26.2381	25.8848
PF3D7_0532300	Plasmodium falciparum 3D7	Plasmodium exported protein (PHISTb), unknown function	N/A	Previous IDs: MAL5P1.314;PFE1600w	1	0	Biotin (K)	0	1	1	332;335	NA	GIDLSNVNYDDHFKNGK	_GIDLSNVNYDDHFK(bi)NGK_;_GIDLSNVNYDDHFK(bi)NGK_;_GIDLSNVNYDDHFK(bi)NGK_;_GIDLSNVNYDDHFK(bi)NGK_;_GIDLSNVNYDDHFK(bi)NGK_;_GIDLSNVNYDDHFK(bi)NGK_;_GIDLSNVNYDDHFKNGK(bi)_;_GIDLSNVNYDDHFK(bi)NGK_;_GIDLSNVNYDDHFKNGK(bi)_;_GIDLSNVNYDDHFK(bi)NGK_;_GIDLSNVNYDDHFK(bi)NGK_;_GIDLSNVNYDDHFK(bi)NGK_;_GIDLSNVNYDDHFK(bi)NGK_;_GIDLSNVNYDDHFK(bi)NGK_;_GIDLSNVNYDDHFKNGK(bi)_;_GIDLSNVNYDDHFK(bi)NGK_;_GIDLSNVNYDDHFK…	0.00013042	3.21478	1.98547	26.5158	26.0584	26.2665	24.3477	24.2301	24.3066
PF3D7_0202000	Plasmodium falciparum 3D7	knob-associated histidine-rich protein	KAHRP	Previous IDs: PF02_0020;PFB0100c	1	0	Biotin (K);Phospho (STY)	1	1	3	585;581;571;575	579;578;570	EASTSKEATKEASTSKGATK	_EASTSKEATKEASTSKGATK(bi)_;_EASTSKEATKEASTSK(bi)GATK_;_EASTSKEATKEASTSKGATK(bi)_;_EASTSKEATKEASTSK(bi)GATK_;_EASTSKEATKEASTSK(bi)GATK_;_EASTSKEATKEASTSK(bi)GATK_;_EASTSKEATKEASTSK(bi)GATK_;_EASTSKEATKEASTSK(bi)GATK_;_EASTSKEATKEASTSK(bi)GATK_;_EASTSKEATKEASTSK(bi)GATK_;_EASTSKEATKEASTSK(bi)GATK_;_EASTSKEATKEASTSK(bi)GATK_;_EASTSKEATKEASTSK(bi)GATK_;_EASTSKEATKEASTSK(bi)GATK_;_EASTSKEATKEASTSK(bi)…	0.0363506	1.35667	1.97536	21.0699	21.3401	21.699	20.0505	19.9598	18.1726
PF3D7_0905400	Plasmodium falciparum 3D7	high molecular weight rhoptry protein 3	RhopH3	Previous IDs: PFI0265c	1	0	Biotin (K)	0	1	3	856	NA	SSLKLDQLDKEKPK	_SSLK(bi)LDQLDKEKPK_;_SSLK(bi)LDQLDKEKPK_;_SSLK(bi)LDQLDKEKPK_;_SSLK(bi)LDQLDKEKPK_;_SSLK(bi)LDQLDKEKPK_;_SSLK(bi)LDQLDKEKPK_;_SSLK(bi)LDQLDKEKPK_	0.0318423	1.40587	1.97431	20.8483	21.1632	22.0238	18.9319	18.8136	20.3668
PF3D7_0532400	Plasmodium falciparum 3D7	lysine-rich membrane-associated PHISTb protein	LyMP	Previous IDs: MAL5P1.315;PFE1605w	1	0	Biotin (K)	0	1	1	440	NA	VGGANTKVR	_VGGANTK(bi)VR_;_VGGANTK(bi)VR_;_VGGANTK(bi)VR_;_VGGANTK(bi)VR_;_VGGANTK(bi)VR_;_VGGANTK(bi)VR_;_VGGANTK(bi)VR_;_VGGANTK(bi)VR_;_VGGANTK(bi)VR_;_VGGANTK(bi)VR_;_VGGANTK(bi)VR_;_VGGANTK(bi)VR_	0.000398614	2.922	1.96858	22.5475	22.2481	22.5043	20.24	20.7596	20.3944
PF3D7_0201900	Plasmodium falciparum 3D7	erythrocyte membrane protein 3	EMP3	Previous IDs: PF02_0019;PFB0095c	1	0	Biotin (K);Oxidation (M)	0	1	3	1279	NA	NKELLNKDISNKDMK	_NKELLNK(bi)DISNKDM(ox)K_;_NKELLNK(bi)DISNKDM(ox)K_;_NKELLNK(bi)DISNKDM(ox)K_;_NKELLNK(bi)DISNKDM(ox)K_;_NKELLNK(bi)DISNKDM(ox)K_;_NKELLNK(bi)DISNKDM(ox)K_;_NKELLNK(bi)DISNKDM(ox)K_;_NKELLNK(bi)DISNKDM(ox)K_;_NKELLNK(bi)DISNKDM(ox)K_;_NKELLNK(bi)DISNKDM(ox)K_;_NKELLNK(bi)DISNKDM(ox)K_;_NKELLNK(bi)DISNKDM(ox)K_;_NKELLNK(bi)DISNKDM(ox)K_;_NKELLNK(bi)DISNKDM(ox)K_;_NKELLNK(bi)DISNKDM(ox)K_;_NKELLNK(…	0.0455698	1.26703	1.94065	21.02	21.8225	21.5706	20.186	20.1422	18.2629
PF3D7_1420100	Plasmodium falciparum 3D7	conserved Plasmodium protein, unknown function	N/A	Previous IDs: PF14_0195	1	0	Biotin (K);Oxidation (M);Phospho (STY)	1	1	3	1161	1153;1156	SMISNLKMKKK	_S(ph)MISNLKM(ox)K(bi)KK_;_SMIS(ph)NLKM(ox)K(bi)KK_;_SMIS(ph)NLKM(ox)K(bi)KK_;_SMIS(ph)NLKM(ox)K(bi)KK_;_SMIS(ph)NLKM(ox)K(bi)KK_	0.0107568	1.81874	1.93613	21.06	20.8882	21.1681	19.9421	18.6126	18.7533
PF3D7_0202000	Plasmodium falciparum 3D7	knob-associated histidine-rich protein	KAHRP	Previous IDs: PF02_0020;PFB0100c	1	0	Biotin (K)	0	1	2	211	NA	KRFPLGMNDEDEEGK	_K(bi)RFPLGMNDEDEEGK_;_K(bi)RFPLGMNDEDEEGK_;_K(bi)RFPLGMNDEDEEGK_;_K(bi)RFPLGM(ox)NDEDEEGK_;_K(bi)RFPLGM(ox)NDEDEEGK_	0.00228369	2.37812	1.93544	21.3784	21.1355	20.9514	18.9849	18.9534	19.7207
PF3D7_0201900	Plasmodium falciparum 3D7	erythrocyte membrane protein 3	EMP3	Previous IDs: PF02_0019;PFB0095c	1	0	Biotin (K)	0	1	3	356	NA	YYLKEDGEGDLKDVEEKLEETGYGFR	_YYLK(bi)EDGEGDLKDVEEKLEETGYGFR_;_YYLK(bi)EDGEGDLKDVEEKLEETGYGFR_;_YYLK(bi)EDGEGDLKDVEEKLEETGYGFR_;_YYLK(bi)EDGEGDLKDVEEKLEETGYGFR_;_YYLK(bi)EDGEGDLKDVEEKLEETGYGFR_;_YYLK(bi)EDGEGDLKDVEEKLEETGYGFR_;_YYLK(bi)EDGEGDLKDVEEKLEETGYGFR_;_YYLK(bi)EDGEGDLKDVEEKLEETGYGFR_	0.00275031	2.31596	1.91969	22.8433	23.3097	22.377	21.1167	20.7306	20.9236
P69905	Homo sapiens (Human)	Hemoglobin subunit alpha (Alpha-globin) (Hemoglobin alpha chain)	HBA1; HBA2	NA	0	1	Biotin (K)	0	1	1	17	NA	AAWGKVGAHAGEYGAEALER	_AAWGK(bi)VGAHAGEYGAEALER_;_AAWGK(bi)VGAHAGEYGAEALER_;_AAWGK(bi)VGAHAGEYGAEALER_;_AAWGK(bi)VGAHAGEYGAEALER_;_AAWGK(bi)VGAHAGEYGAEALER_;_AAWGK(bi)VGAHAGEYGAEALER_;_AAWGK(bi)VGAHAGEYGAEALER_;_AAWGK(bi)VGAHAGEYGAEALER_;_AAWGK(bi)VGAHAGEYGAEALER_;_AAWGK(bi)VGAHAGEYGAEALER_;_AAWGK(bi)VGAHAGEYGAEALER_;_AAWGK(bi)VGAHAGEYGAEALER_;_AAWGK(bi)VGAHAGEYGAEALER_;_AAWGK(bi)VGAHAGEYGAEALER_;_AAWGK(bi)VGAHAGEYGAE…	0.000140049	3.19726	1.91035	24.4258	24.6261	24.6383	22.4939	22.8759	22.5893
P69905	Homo sapiens (Human)	Hemoglobin subunit alpha (Alpha-globin) (Hemoglobin alpha chain)	HBA1; HBA2	NA	0	1	Biotin (K)	0	1	1	12	NA	TNVKAAWGK	_TNVK(bi)AAWGK_;_TNVK(bi)AAWGK_;_TNVK(bi)AAWGK_;_TNVK(bi)AAWGK_;_TNVK(bi)AAWGK_;_TNVK(bi)AAWGK_;_TNVK(bi)AAWGK_;_TNVK(bi)AAWGK_;_TNVK(bi)AAWGK_;_TNVK(bi)AAWGK_	0.000948189	2.65502	1.90818	22.2844	22.4066	22.5808	20.3511	20.2807	20.9155
P11171	Homo sapiens (Human)	Protein 4.1 (P4.1) (4.1R) (Band 4.1) (EPB4.1) (Erythrocyte membrane protein band 4.1)	EPB41 E41P	NA	0	1	Biotin (K);Phospho (STY)	1	1	1	852	849;851	EQHPDMSVTKVVVHQETEIADE	_EQHPDMSVTK(bi)VVVHQETEIADE_;_EQHPDMSVTK(bi)VVVHQETEIADE_;_EQHPDMSVTK(bi)VVVHQETEIADE_;_EQHPDMSVTK(bi)VVVHQETEIADE_;_EQHPDMSVTK(bi)VVVHQETEIADE_;_EQHPDMSVTK(bi)VVVHQETEIADE_;_EQHPDMSVTK(bi)VVVHQETEIADE_;_EQHPDMSVTK(bi)VVVHQETEIADE_;_EQHPDMSVTK(bi)VVVHQETEIADE_;_EQHPDMSVTK(bi)VVVHQETEIADE_;_EQHPDMSVTK(bi)VVVHQETEIADE_;_EQHPDMSVTK(bi)VVVHQETEIADE_;_EQHPDMSVTK(bi)VVVHQETEIADE_;_EQHPDMSVTK(bi)VVVHQET…	0.000619589	2.79466	1.9074	23.259	23.8761	23.5675	21.5583	21.8198	21.6023
P48426	Homo sapiens (Human)	Phosphatidylinositol 5-phosphate 4-kinase type-2 alpha (EC 2.7.1.149) (1-phosphatidylinositol 5-phosphate 4-kinase 2-alpha) (Diphosphoinositide kinase 2-alpha) (PIP5KIII) (Phosphatidylinositol 5-Phosphate 4-Kinase) (PI5P4Kalpha) (Phosphatidylinositol 5-phosphate 4-kinase type II alpha) (PI(5)P 4-kinase type II alpha) (PIP4KII-alpha) (PtdIns(4)P-5-kinase B isoform) (PtdIns(4)P-5-kinase C isoform) …	PIP4K2A PI5P4KA PIP5K2 PIP5K2A	NA	0	1	Biotin (K)	0	1	1	375	NA	AAHAAKTVK	_AAHAAK(bi)TVK_;_AAHAAK(bi)TVK_;_AAHAAK(bi)TVK_;_AAHAAK(bi)TVK_;_AAHAAK(bi)TVK_;_AAHAAK(bi)TVK_	0.0016876	2.48003	1.89338	20.0497	19.9371	20.217	18.4095	17.6969	18.4173
P78356	Homo sapiens (Human)	Phosphatidylinositol 5-phosphate 4-kinase type-2 beta (EC 2.7.1.149) (1-phosphatidylinositol 5-phosphate 4-kinase 2-beta) (Diphosphoinositide kinase 2-beta) (Phosphatidylinositol 5-phosphate 4-kinase type II beta) (PI(5)P 4-kinase type II beta) (PIP4KII-beta) (PtdIns(5)P-4-kinase isoform 2-beta)	PIP4K2B PIP5K2B	NA	0	1	Biotin (K)	0	1	1	385	NA	AAHAAKTVK	_AAHAAK(bi)TVK_;_AAHAAK(bi)TVK_;_AAHAAK(bi)TVK_;_AAHAAK(bi)TVK_;_AAHAAK(bi)TVK_;_AAHAAK(bi)TVK_	0.0016876	2.48003	1.89338	20.0497	19.9371	20.217	18.4095	17.6969	18.4173
Q8TBX8	Homo sapiens (Human)	Phosphatidylinositol 5-phosphate 4-kinase type-2 gamma (EC 2.7.1.149) (Phosphatidylinositol 5-phosphate 4-kinase type II gamma) (PI(5)P 4-kinase type II gamma) (PIP4KII-gamma)	PIP4K2C PIP5K2C	NA	0	1	Biotin (K)	0	1	1	390	NA	AAHAAKTVK	_AAHAAK(bi)TVK_;_AAHAAK(bi)TVK_;_AAHAAK(bi)TVK_;_AAHAAK(bi)TVK_;_AAHAAK(bi)TVK_;_AAHAAK(bi)TVK_	0.0016876	2.48003	1.89338	20.0497	19.9371	20.217	18.4095	17.6969	18.4173
Q13404	Homo sapiens (Human)	Ubiquitin-conjugating enzyme E2 variant 1 (UEV-1) (CROC-1) (TRAF6-regulated IKK activator 1 beta Uev1A)	UBE2V1 CROC1 UBE2V UEV1 P/OKcl.19	NA	0	1	Acetyl (Protein N-term);Biotin (K)	0	1	1	10	NA	AATTGSGVKVPR	_(ac)AATTGSGVK(bi)VPR_;_(ac)AATTGSGVK(bi)VPR_;_(ac)AATTGSGVK(bi)VPR_;_(ac)AATTGSGVK(bi)VPR_;_(ac)AATTGSGVK(bi)VPR_;_(ac)AATTGSGVK(bi)VPR_;_(ac)AATTGSGVK(bi)VPR_;_(ac)AATTGSGVK(bi)VPR_;_(ac)AATTGSGVK(bi)VPR_;_(ac)AATTGSGVK(bi)VPR_;_(ac)AATTGSGVK(bi)VPR_;_(ac)AATTGSGVK(bi)VPR_;_(ac)AATTGSGVK(bi)VPR_;_(ac)AATTGSGVK(bi)VPR_;_(ac)AATTGSGVK(bi)VPR_;_(ac)AATTGSGVK(bi)VPR_;_(ac)AATTGSGVK(bi)VPR_;_(ac)AAT…	4.70269e-05	3.4775	1.89235	24.7615	24.5222	24.7964	22.7014	22.8759	22.8258
PF3D7_1001000	Plasmodium falciparum 3D7	Plasmodium exported protein (hyp12), unknown function	PfJ13	Previous IDs: PF10_0013	1	0	Biotin (K)	0	1	2	66	NA	NCKCVNKR	_NCK(bi)CVNKR_;_NCK(bi)CVNKR_;_NCK(bi)CVNKR_;_NCK(bi)CVNKR_;_NCK(bi)CVNKR_;_NCK(bi)CVNKR_;_NCK(bi)CVNKR_;_NCK(bi)CVNKR_;_NCK(bi)CVNKR_;_NCK(bi)CVNKR_;_NCK(bi)CVNKR_;_NCK(bi)CVNKR_	0.0153695	1.68515	1.88596	20.7125	20.1204	20.821	17.8545	19.1827	18.9588
PF3D7_0500800	Plasmodium falciparum 3D7	mature parasite-infected erythrocyte surface antigen	MESA	Previous IDs: MAL5P1.9;PFE0040c	1	0	Biotin (K)	0	1	2	340	NA	EGNKVSGPYENSENSNVTSESEETKK	_EGNK(bi)VSGPYENSENSNVTSESEETKK_;_EGNK(bi)VSGPYENSENSNVTSESEETKK_;_EGNK(bi)VSGPYENSENSNVTSESEETKK_;_EGNK(bi)VSGPYENSENSNVTSESEETKK_;_EGNK(bi)VSGPYENSENSNVTSESEETKK_;_EGNK(bi)VSGPYENSENSNVTSESEETKK_;_EGNK(bi)VSGPYENSENSNVTSESEETKK_	0.0136352	1.73102	1.86775	21.2345	21.6155	21.3468	18.6975	20.1273	19.7687
PF3D7_1108600	Plasmodium falciparum 3D7	endoplasmic reticulum-resident calcium binding protein	ERC	Previous IDs: PF11_0098	1	0	Biotin (K)	0	1	2	272	NA	KITYDLWNEKALK	_KITYDLWNEK(bi)ALK_;_KITYDLWNEK(bi)ALK_;_KITYDLWNEK(bi)ALK_;_KITYDLWNEK(bi)ALK_;_KITYDLWNEK(bi)ALK_;_KITYDLWNEK(bi)ALK_	0.0176437	1.63298	1.85214	21.4171	21.4663	20.9643	18.6137	20.1584	19.5191
Q01518	Homo sapiens (Human)	Adenylyl cyclase-associated protein 1 (CAP 1)	CAP1 CAP	NA	0	1	Biotin (K)	0	1	2	282	NA	HVSDDMKTHKNPALK	_HVSDDMKTHK(bi)NPALK_;_HVSDDMKTHK(bi)NPALK_;_HVSDDMKTHK(bi)NPALK_;_HVSDDMKTHK(bi)NPALK_;_HVSDDMKTHK(bi)NPALK_;_HVSDDMKTHK(bi)NPALK_	0.135244	0.82499	1.85021	19.942	20.4901	20.3272	17.1646	20.332	17.7121
PF3D7_0202000	Plasmodium falciparum 3D7	knob-associated histidine-rich protein	KAHRP	Previous IDs: PF02_0020;PFB0100c	1	0	Biotin (K);Phospho (STY)	1	1	1	351;354	345	YSSFSSVNKYGK	_YSSFSSVNK(bi)YGK_;_YSSFSSVNK(bi)YGK_;_YSSFSSVNK(bi)YGK_;_YSSFSSVNK(bi)YGK_;_YSSFSSVNK(bi)YGK_;_YSSFSSVNK(bi)YGK_;_YSSFSSVNK(bi)YGK_;_YSSFSSVNK(bi)YGK_;_YSSFSSVNKYGK(bi)_;_YSSFSSVNK(bi)YGK_;_YSSFSSVNK(bi)YGK_;_YSSFSSVNK(bi)YGK_;_YSSFSSVNK(bi)YGK_;_YSSFSSVNK(bi)YGK_;_YSSFSSVNK(bi)YGK_;_YSSFSSVNKYGK(bi)_;_YSSFSSVNK(bi)YGK_;_YSSFSSVNK(bi)YGK_;_YSSFSSVNK(bi)YGK_;_YSSFSSVNK(bi)YGK_;_YSSFSSVNK(bi)YGK_;…	0.0101697	1.84129	1.84833	22.411	22.7479	23.6517	21.3983	21.0015	20.8658
PF3D7_0730800	Plasmodium falciparum 3D7	Plasmodium exported protein, unknown function	N/A	Previous IDs: MAL7P1.170;PF3D7_0730800.1;PF3D7_0730800.2	1	0	Biotin (K)	0	1	1	175	NA	NIMKSFGGDFSNTVQGATGIPGK	_NIM(ox)K(bi)SFGGDFSNTVQGATGIPGK_;_NIM(ox)K(bi)SFGGDFSNTVQGATGIPGK_;_NIM(ox)K(bi)SFGGDFSNTVQGATGIPGK_;_NIM(ox)K(bi)SFGGDFSNTVQGATGIPGK_;_NIM(ox)K(bi)SFGGDFSNTVQGATGIPGK_;_NIM(ox)K(bi)SFGGDFSNTVQGATGIPGK_;_NIM(ox)K(bi)SFGGDFSNTVQGATGIPGK_;_NIMK(bi)SFGGDFSNTVQGATGIPGK_;_NIMK(bi)SFGGDFSNTVQGATGIPGK_;_NIMK(bi)SFGGDFSNTVQGATGIPGK_;_NIMK(bi)SFGGDFSNTVQGATGIPGK_;_NIMK(bi)SFGGDFSNTVQGATGIPGK_;_NIMK(bi)SF…	0.00134605	2.55384	1.84788	24.0128	24.498	23.8805	22.5187	22.2826	22.0464
PF3D7_1200700	Plasmodium falciparum 3D7	acyl-CoA synthetase	ACS7	Previous IDs: 2277.t00007;MAL12P1.7;PFL0035c	1	0	Biotin (K);Phospho (STY)	1	1	3	876	877	KSEEKPVSKTVQK	_KSEEKPVSK(bi)TVQK_;_KSEEKPVSK(bi)TVQK_;_KSEEKPVSK(bi)TVQK_;_KSEEKPVSK(bi)TVQK_;_KSEEKPVSK(bi)TVQK_;_KSEEKPVSK(bi)TVQK_;_KSEEKPVSK(bi)TVQK_;_KSEEKPVSK(bi)TVQK_;_KSEEKPVSK(bi)TVQK_;_KSEEKPVSK(bi)TVQK_;_KSEEKPVSK(bi)TVQK_;_KSEEKPVSK(bi)TVQK_;_KSEEKPVSK(bi)T(ph)VQK_;_KSEEKPVSK(bi)T(ph)VQK_;_KSEEKPVSK(bi)T(ph)VQK_	0.0134286	1.73633	1.84127	20.4868	20.643	20.7404	18.8138	18.0228	19.5098
PF3D7_0201900	Plasmodium falciparum 3D7	erythrocyte membrane protein 3	EMP3	Previous IDs: PF02_0019;PFB0095c	1	0	Biotin (K)	0	1	1	1759;1837;1915;2032;2110;2331	NA	QQNTGLKNTPNEGQQNTGLK	_QQNTGLK(bi)NTPNEGQQNTGLK_;_QQNTGLK(bi)NTPNEGQQNTGLK_;_QQNTGLK(bi)NTPNEGQQNTGLK_;_QQNTGLK(bi)NTPNEGQQNTGLK_;_QQNTGLK(bi)NTPNEGQQNTGLK_	0.00831054	1.9158	1.83909	21.4815	20.7712	20.8254	19.1922	18.6607	19.708
P37840	Homo sapiens (Human)	Alpha-synuclein (Non-A beta component of AD amyloid) (Non-A4 component of amyloid precursor) (NACP)	SNCA NACP PARK1	NA	0	1	Biotin (K)	0	1	1	43;45	NA	EGVLYVGSKTK	_EGVLYVGSK(bi)TK_;_EGVLYVGSK(bi)TK_;_EGVLYVGSK(bi)TK_;_EGVLYVGSK(bi)TK_;_EGVLYVGSK(bi)TK_;_EGVLYVGSKTK(bi)_;_EGVLYVGSKTK(bi)_;_EGVLYVGSKTK(bi)_;_EGVLYVGSK(bi)TK_;_EGVLYVGSK(bi)TK_;_EGVLYVGSK(bi)TK_;_EGVLYVGSK(bi)TK_;_EGVLYVGSK(bi)TK_;_EGVLYVGSKTK(bi)_;_EGVLYVGSK(bi)TK_;_EGVLYVGSK(bi)TK_;_EGVLYVGSK(bi)TK_;_EGVLYVGSK(bi)TK_;_EGVLYVGSK(bi)TK_;_EGVLYVGSK(bi)TK_;_EGVLYVGSKTK(bi)_;_EGVLYVGSK(bi)TK_;_EG…	0.00160563	2.49526	1.83832	30.525	30.5569	30.1572	28.7555	28.803	28.1657
PF3D7_0401800	Plasmodium falciparum 3D7	Plasmodium exported protein (PHISTb), unknown function	PfD80	Previous IDs: MAL4P1.16;PFD0080c	1	0	Biotin (K)	0	1	3	355;347	NA	GFGCDCKDAANYILKNLDLYDEHEAKK	_GFGCDCKDAANYILK(bi)NLDLYDEHEAKK_;_GFGCDCKDAANYILK(bi)NLDLYDEHEAKK_;_GFGCDCKDAANYILK(bi)NLDLYDEHEAKK_;_GFGCDCKDAANYILK(bi)NLDLYDEHEAKK_;_GFGCDCKDAANYILK(bi)NLDLYDEHEAKK_;_GFGCDCKDAANYILK(bi)NLDLYDEHEAKK_;_GFGCDCKDAANYILK(bi)NLDLYDEHEAKK_;_GFGCDCKDAANYILK(bi)NLDLYDEHEAKK_;_GFGCDCKDAANYILK(bi)NLDLYDEHEAKK_;_GFGCDCKDAANYILK(bi)NLDLYDEHEAKK_;_GFGCDCKDAANYILK(bi)NLDLYDEHEAKK_;_GFGCDCKDAANYILK(bi)NLDLY…	0.0019951	2.42354	1.83296	28.2077	28.419	27.6026	26.3663	26.2512	26.113
PF3D7_1200700	Plasmodium falciparum 3D7	acyl-CoA synthetase	ACS7	Previous IDs: 2277.t00007;MAL12P1.7;PFL0035c	1	0	Biotin (K)	0	1	1	852	NA	SVLKSENVDVSK	_SVLK(bi)SENVDVSK_;_SVLK(bi)SENVDVSK_;_SVLK(bi)SENVDVSK_;_SVLK(bi)SENVDVSK_;_SVLK(bi)SENVDVSK_;_SVLK(bi)SENVDVSK_;_SVLK(bi)SENVDVSK_;_SVLK(bi)SENVDVSK_;_SVLK(bi)SENVDVSK_	0.00960233	1.86207	1.82116	21.3481	21.3441	21.5632	20.0995	19.8499	18.8426
P37840	Homo sapiens (Human)	Alpha-synuclein (Non-A beta component of AD amyloid) (Non-A4 component of amyloid precursor) (NACP)	SNCA NACP PARK1	NA	0	1	Biotin (K)	0	1	2	32;23	NA	TKQGVAEAAGKTK	_TKQGVAEAAGK(bi)TK_;_TKQGVAEAAGK(bi)TK_;_TKQGVAEAAGK(bi)TK_;_TKQGVAEAAGK(bi)TK_;_TKQGVAEAAGK(bi)TK_;_TKQGVAEAAGK(bi)TK_;_TKQGVAEAAGK(bi)TK_;_TKQGVAEAAGK(bi)TK_;_TKQGVAEAAGK(bi)TK_;_TKQGVAEAAGK(bi)TK_;_TKQGVAEAAGK(bi)TK_;_TKQGVAEAAGK(bi)TK_;_TKQGVAEAAGK(bi)TK_;_TKQGVAEAAGK(bi)TK_;_TKQGVAEAAGK(bi)TK_;_TKQGVAEAAGK(bi)TK_;_TKQGVAEAAGK(bi)TK_;_TKQGVAEAAGK(bi)TK_;_TKQGVAEAAGK(bi)TK_;_TKQGVAEAAGK(bi)TK_…	0.00661998	1.99711	1.81559	27.017	27.2711	26.9228	25.0418	25.9112	24.8111
PF3D7_0401800	Plasmodium falciparum 3D7	Plasmodium exported protein (PHISTb), unknown function	PfD80	Previous IDs: MAL4P1.16;PFD0080c	1	0	Biotin (K);Oxidation (M)	0	1	2	397;390;399	NA	TKDPNMFNKNK	_TKDPNM(ox)FNK(bi)NK_;_TKDPNM(ox)FNK(bi)NK_;_TKDPNM(ox)FNK(bi)NK_;_TKDPNM(ox)FNK(bi)NK_;_TKDPNM(ox)FNK(bi)NK_;_TKDPNM(ox)FNK(bi)NK_;_TKDPNM(ox)FNK(bi)NK_;_TK(bi)DPNMFNKNK_;_TKDPNMFNK(bi)NK_;_TKDPNMFNK(bi)NK_;_TKDPNMFNK(bi)NK_;_TK(bi)DPNMFNKNK_;_TKDPNMFNKNK(bi)_;_TKDPNMFNK(bi)NK_;_TK(bi)DPNMFNKNK_;_TKDPNMFNK(bi)NK_;_TKDPNMFNK(bi)NK_;_TK(bi)DPNMFNKNK_;_TKDPNMFNKNK(bi)_;_TKDPNMFNK(bi)NK_;_TK(bi)DPNM…	0.0599007	1.15642	1.81554	19.7568	19.7925	21.0587	19.0491	18.8188	17.2935
PF3D7_0936300	Plasmodium falciparum 3D7	ring-exported protein 3	REX3	Previous IDs: PFI1755c	1	0	Biotin (K)	0	1	2	129	NA	NKIFNFPIPSAEGTVSKEFK	_NK(bi)IFNFPIPSAEGTVSKEFK_;_NK(bi)IFNFPIPSAEGTVSKEFK_;_NK(bi)IFNFPIPSAEGTVSKEFK_;_NK(bi)IFNFPIPSAEGTVSKEFK_;_NK(bi)IFNFPIPSAEGTVSKEFK_;_NK(bi)IFNFPIPSAEGTVSKEFK_;_NK(bi)IFNFPIPSAEGTVSKEFK_;_NK(bi)IFNFPIPSAEGTVSKEFK_;_NK(bi)IFNFPIPSAEGTVSKEFK_;_NK(bi)IFNFPIPSAEGTVSKEFK_;_NK(bi)IFNFPIPSAEGTVSKEFK_;_NK(bi)IFNFPIPSAEGTVSKEFK_;_NK(bi)IFNFPIPSAEGTVSKEFK_;_NK(bi)IFNFPIPSAEGTVSKEFK_;_NK(bi)IFNFPIPSAEGTVS…	0.0167556	1.65284	1.81175	24.0784	24.3775	24.0489	22.0487	23.2354	21.7854
PF3D7_1478600	Plasmodium falciparum 3D7	EMP1-trafficking protein	PTP3	Previous IDs: PF14_0758	1	0	Biotin (K)	0	1	1	233	NA	TNNTDYGTKIR	_TNNTDYGTK(bi)IR_;_TNNTDYGTK(bi)IR_;_TNNTDYGTK(bi)IR_;_TNNTDYGTK(bi)IR_;_TNNTDYGTK(bi)IR_;_TNNTDYGTK(bi)IR_;_TNNTDYGTK(bi)IR_;_TNNTDYGTK(bi)IR_;_TNNTDYGTK(bi)IR_	0.00338234	2.24449	1.7987	20.9428	20.8093	21.361	19.6422	19.2502	18.8245
PF3D7_0202000	Plasmodium falciparum 3D7	knob-associated histidine-rich protein	KAHRP	Previous IDs: PF02_0020;PFB0100c	1	0	Biotin (K)	0	1	3	585;581;571;575	NA	EASTSKEATKEASTSKGATK	_EASTSKEATKEASTSKGATK(bi)_;_EASTSKEATKEASTSK(bi)GATK_;_EASTSKEATKEASTSKGATK(bi)_;_EASTSKEATKEASTSK(bi)GATK_;_EASTSKEATKEASTSK(bi)GATK_;_EASTSKEATKEASTSK(bi)GATK_;_EASTSKEATKEASTSK(bi)GATK_;_EASTSKEATKEASTSK(bi)GATK_;_EASTSKEATKEASTSK(bi)GATK_;_EASTSKEATKEASTSK(bi)GATK_;_EASTSKEATKEASTSK(bi)GATK_;_EASTSKEATKEASTSK(bi)GATK_;_EASTSKEATKEASTSK(bi)GATK_;_EASTSKEATKEASTSK(bi)GATK_;_EASTSKEATKEASTSK(bi)…	0.0410487	1.30817	1.79751	21.2013	20.583	21.7015	20.3863	18.8443	18.8626
P46060	Homo sapiens (Human)	Ran GTPase-activating protein 1 (RanGAP1)	RANGAP1 KIAA1835 SD	NA	0	1	Biotin (K)	0	1	2	406	NA	GQGEKSATPSRK	_GQGEK(bi)SATPSRK_;_GQGEK(bi)SATPSRK_;_GQGEK(bi)SATPSRK_;_GQGEK(bi)SATPSRK_;_GQGEK(bi)SATPSRK_;_GQGEK(bi)SATPSRK_	0.0302625	1.42717	1.79602	19.7787	19.6548	20.1071	16.9956	18.5065	18.6504
PF3D7_1478600	Plasmodium falciparum 3D7	EMP1-trafficking protein	PTP3	Previous IDs: PF14_0758	1	0	Biotin (K)	0	1	2	333	NA	NEPAMKNPNVTNDMTKPK	_NEPAMK(bi)NPNVTNDMTKPK_;_NEPAMK(bi)NPNVTNDMTKPK_;_NEPAMK(bi)NPNVTNDMTKPK_;_NEPAMK(bi)NPNVTNDMTKPK_;_NEPAMK(bi)NPNVTNDMTKPK_;_NEPAMK(bi)NPNVTNDMTKPK_;_NEPAMK(bi)NPNVTNDMTKPK_;_NEPAMK(bi)NPNVTNDMTKPK_;_NEPAMK(bi)NPNVTNDMTKPK_;_NEPAMK(bi)NPNVTNDMTKPK_	0.0151008	1.69063	1.79299	20.9156	20.9655	20.8895	18.4964	19.9733	18.922
PF3D7_0532400	Plasmodium falciparum 3D7	lysine-rich membrane-associated PHISTb protein	LyMP	Previous IDs: MAL5P1.315;PFE1605w	1	0	Biotin (K)	0	1	1	414	NA	KNPEMLTENQINEEENENTK	_K(bi)NPEM(ox)LTENQINEEENENTK_;_K(bi)NPEM(ox)LTENQINEEENENTK_;_K(bi)NPEM(ox)LTENQINEEENENTK_;_K(bi)NPEM(ox)LTENQINEEENENTK_;_K(bi)NPEM(ox)LTENQINEEENENTK_;_K(bi)NPEM(ox)LTENQINEEENENTK_;_K(bi)NPEM(ox)LTENQINEEENENTK_;_K(bi)NPEM(ox)LTENQINEEENENTK_;_K(bi)NPEM(ox)LTENQINEEENENTK_;_K(bi)NPEM(ox)LTENQINEEENENTK_;_K(bi)NPEM(ox)LTENQINEEENENTK_;_K(bi)NPEM(ox)LTENQINEEENENTK_;_K(bi)NPEM(ox)LTENQINEEENEN…	0.00271954	2.31856	1.78201	27.2835	27.1696	26.7726	25.0376	25.7329	25.1092
PF3D7_1149600	Plasmodium falciparum 3D7	DnaJ protein, putative	N/A	Previous IDs: PF11_0513	1	0	Biotin (K)	0	1	2	122	NA	YLEKFINNDMSKR	_YLEK(bi)FINNDMSKR_;_YLEK(bi)FINNDMSKR_;_YLEK(bi)FINNDMSKR_;_YLEK(bi)FINNDMSKR_;_YLEK(bi)FINNDMSKR_;_YLEK(bi)FINNDMSKR_;_YLEK(bi)FINNDMSKR_;_YLEK(bi)FINNDMSKR_;_YLEK(bi)FINNDMSKR_;_YLEK(bi)FINNDMSKR_	0.00113921	2.60168	1.78193	22.8723	22.7053	22.6595	20.5619	21.227	21.1025
PF3D7_0936800	Plasmodium falciparum 3D7	Plasmodium exported protein (PHISTc), unknown function	N/A	Previous IDs: PFI1780w	1	0	Biotin (K)	0	1	2	312	NA	VQQQKVQPPKSQQQK	_VQQQK(bi)VQPPKSQQQK_;_VQQQK(bi)VQPPKSQQQK_;_VQQQK(bi)VQPPKSQQQK_;_VQQQK(bi)VQPPKSQQQK_;_VQQQK(bi)VQPPKSQQQK_;_VQQQK(bi)VQPPKSQQQK_	0.000225007	3.0815	1.77413	20.0944	20.0596	20.4784	18.5156	18.379	18.4154
PF3D7_0201900	Plasmodium falciparum 3D7	erythrocyte membrane protein 3	EMP3	Previous IDs: PF02_0019;PFB0095c	1	0	Biotin (K)	0	1	1	821;843;865;931;953;975	NA	AHENLEEYNETDLAKGK	_AHENLEEYNETDLAK(bi)GK_;_AHENLEEYNETDLAK(bi)GK_;_AHENLEEYNETDLAK(bi)GK_;_AHENLEEYNETDLAK(bi)GK_;_AHENLEEYNETDLAK(bi)GK_;_AHENLEEYNETDLAK(bi)GK_	0.000240823	3.05522	1.77043	21.6551	21.8791	21.555	19.7494	19.9146	20.1139
PF3D7_1139300	Plasmodium falciparum 3D7	AP2 domain transcription factor, putative	ApiAP2	Previous IDs: PF11_0404	1	0	Biotin (K)	0	1	1	713	NA	YLTNEDKSVHINLLNSVMK	_YLTNEDK(bi)SVHINLLNSVMK_;_YLTNEDK(bi)SVHINLLNSVMK_;_YLTNEDK(bi)SVHINLLNSVMK_;_YLTNEDK(bi)SVHINLLNSVMK_;_YLTNEDK(bi)SVHINLLNSVMK_;_YLTNEDK(bi)SVHINLLNSVMK_;_YLTNEDK(bi)SVHINLLNSVMK_;_YLTNEDK(bi)SVHINLLNSVMK_;_YLTNEDK(bi)SVHINLLNSVMK_;_YLTNEDK(bi)SVHINLLNSVMK_;_YLTNEDK(bi)SVHINLLNSVMK_;_YLTNEDK(bi)SVHINLLNSVMK_;_YLTNEDK(bi)SVHINLLNSVMK_;_YLTNEDK(bi)SVHINLLNSVMK_;_YLTNEDK(bi)SVHINLLNSVMK_;_YLTNEDK(…	0.00318976	2.26365	1.76249	22.4454	22.1164	22.4177	21.0105	20.564	20.1175
PF3D7_0202000	Plasmodium falciparum 3D7	knob-associated histidine-rich protein	KAHRP	Previous IDs: PF02_0020;PFB0100c	1	0	2 Biotin (K)	0	2	2	581;585	NA	EASTSKGATKEASTTEGATK	_EAS(ph)TSK(bi)GATKEASTTEGATK_;_EAS(ph)TSKGATK(bi)EASTTEGATK_;_EAS(ph)TSKGATK(bi)EASTTEGATK_;_EAS(ph)TSKGATK(bi)EASTTEGATK_;_EAS(ph)TSKGATK(bi)EASTTEGATK_;_EAS(ph)TSKGATK(bi)EASTTEGATK_;_EAS(ph)TSKGATK(bi)EASTTEGATK_;_EAS(ph)TSKGATK(bi)EASTTEGATK_;_EAS(ph)TSKGATK(bi)EASTTEGATK_;_EAS(ph)TSKGATK(bi)EASTTEGATK_;_EAS(ph)TSKGATK(bi)EASTTEGATK_;_EAS(ph)TSKGATK(bi)EASTTEGATK_;_EASTSK(bi)GATK(bi)EASTTEGA…	0.0143908	1.71012	1.76059	20.6853	20.9853	21.5159	19.3946	18.6555	19.8546
PF3D7_0202000	Plasmodium falciparum 3D7	knob-associated histidine-rich protein	KAHRP	Previous IDs: PF02_0020;PFB0100c	1	0	Biotin (K)	0	1	2	405;432;396;423	NA	HKDNEDAESVKSK	_HKDNEDAESVK(bi)SK_;_HKDNEDAESVK(bi)SK_;_HKDNEDAESVK(bi)SK_;_HKDNEDAESVK(bi)SK_;_HK(bi)DNEDAESVKSK_;_HKDNEDAESVK(bi)SK_;_HKDNEDAESVK(bi)SK_;_HKDNEDAESVK(bi)SK_;_HK(bi)DNEDAESVKSK_	0.0778388	1.05146	1.75656	20.1984	20.6081	20.5863	18.9125	19.8624	17.3482
Q08495	Homo sapiens (Human)	Dematin (Dematin actin-binding protein) (Erythrocyte membrane protein band 4.9)	DMTN DMT EPB49	NA	0	1	Biotin (K)	0	1	2	243	NA	QREELSKVTSNLGK	_QREELSK(bi)VTSNLGK_;_QREELSK(bi)VTSNLGK_;_QREELSK(bi)VTSNLGK_;_QREELSK(bi)VTSNLGK_;_QREELSK(bi)VTSNLGK_;_QREELSK(bi)VTSNLGK_;_QREELSK(bi)VTSNLGK_;_QREELSK(bi)VTSNLGK_;_QREELSK(bi)VTSNLGK_;_QREELSK(bi)VTSNLGK_;_QREELSK(bi)VTSNLGK_;_QREELSK(bi)VTSNLGK_;_QREELSK(bi)VTSNLGK_;_QREELSK(bi)VTSNLGK_;_QREELSK(bi)VTSNLGK_;_QREELSK(bi)VTSNLGK_;_QREELSK(bi)VTSNLGK_;_QREELSK(bi)VTSNLGK_;_QREELSK(bi)VTSNLGK_;…	0.00049709	2.85976	1.7502	25.4035	25.0016	25.2919	23.2636	23.5055	23.6774
PF3D7_0500800	Plasmodium falciparum 3D7	mature parasite-infected erythrocyte surface antigen	MESA	Previous IDs: MAL5P1.9;PFE0040c	1	0	Biotin (K)	0	1	1	164	NA	EKEYLMK	_EK(bi)EYLMK_;_EK(bi)EYLMK_;_EK(bi)EYLMK_;_EK(bi)EYLMK_;_EK(bi)EYLMK_	0.0630925	1.13673	1.74585	20.6899	20.6194	20.6352	18.8623	20.1056	17.739
Q15819	Homo sapiens (Human)	Ubiquitin-conjugating enzyme E2 variant 2 (DDVit 1) (Enterocyte differentiation-associated factor 1) (EDAF-1) (Enterocyte differentiation-promoting factor 1) (EDPF-1) (MMS2 homolog) (Vitamin D3-inducible protein)	UBE2V2 MMS2 UEV2	NA	0	1	Acetyl (Protein N-term);Biotin (K)	0	1	1	8	NA	AVSTGVKVPR	_(ac)AVSTGVK(bi)VPR_;_(ac)AVSTGVK(bi)VPR_;_(ac)AVSTGVK(bi)VPR_;_(ac)AVSTGVK(bi)VPR_;_(ac)AVSTGVK(bi)VPR_;_(ac)AVSTGVK(bi)VPR_;_(ac)AVSTGVK(bi)VPR_;_(ac)AVSTGVK(bi)VPR_;_(ac)AVSTGVK(bi)VPR_;_(ac)AVSTGVK(bi)VPR_;_(ac)AVSTGVK(bi)VPR_;_(ac)AVSTGVK(bi)VPR_;_(ac)AVSTGVK(bi)VPR_;_(ac)AVSTGVK(bi)VPR_	0.00203925	2.41495	1.72564	23.3939	23.2046	23.8188	21.6221	21.5545	22.0638
PF3D7_1426100	Plasmodium falciparum 3D7	transcription factor BTF3, putative	BTF3	Previous IDs: PF14_0241	1	0	Biotin (K)	0	1	2	118	NA	LFEGLKGNKNLDMNLLEK	_LFEGLKGNK(bi)NLDMNLLEK_;_LFEGLKGNK(bi)NLDMNLLEK_;_LFEGLKGNK(bi)NLDMNLLEK_	0.0137312	1.72842	1.72526	20.7447	21.0343	20.4965	19.7827	18.7738	18.5432
PF3D7_0936800	Plasmodium falciparum 3D7	Plasmodium exported protein (PHISTc), unknown function	N/A	Previous IDs: PFI1780w	1	0	Biotin (K)	0	1	2	281;295	NA	KTEHHENVNEDNVEKPK	_K(bi)TEHHENVNEDNVEKPK_;_KTEHHENVNEDNVEK(bi)PK_;_KTEHHENVNEDNVEK(bi)PK_;_KTEHHENVNEDNVEK(bi)PK_;_KTEHHENVNEDNVEK(bi)PK_;_K(bi)TEHHENVNEDNVEKPK_;_KTEHHENVNEDNVEK(bi)PK_;_K(bi)TEHHENVNEDNVEKPK_;_K(bi)TEHHENVNEDNVEKPK_;_K(bi)TEHHENVNEDNVEKPK_;_K(bi)TEHHENVNEDNVEKPK_	0.0562177	1.1808	1.72494	20.6092	20.3834	20.7051	18.4903	20.0836	17.9489
PF3D7_1334500	Plasmodium falciparum 3D7	MSP7-like protein	MSRP6	Previous IDs: PF13_0192	1	0	Biotin (K)	0	1	2	238;242	NA	NVPKYDEKLNNEFK	_NVPK(bi)YDEKLNNEFK_;_NVPK(bi)YDEKLNNEFK_;_NVPKYDEK(bi)LNNEFK_;_NVPK(bi)YDEKLNNEFK_;_NVPK(bi)YDEKLNNEFK_;_NVPK(bi)YDEKLNNEFK_;_NVPK(bi)YDEKLNNEFK_	0.0105538	1.82611	1.71931	20.5716	20.5914	20.5276	18.706	18.2682	19.5585
PF3D7_0500800	Plasmodium falciparum 3D7	mature parasite-infected erythrocyte surface antigen	MESA	Previous IDs: MAL5P1.9;PFE0040c	1	0	Biotin (K)	0	1	2	549;543	NA	DKVIGSEKTQK	_DKVIGSEK(bi)TQK_;_DK(bi)VIGSEKTQK_;_DKVIGSEK(bi)TQK_;_DK(bi)VIGSEKTQK_;_DKVIGSEK(bi)TQK_;_DK(bi)VIGSEKTQK_;_DKVIGSEK(bi)TQK_;_DK(bi)VIGSEKTQK_;_DKVIGSEK(bi)TQK_;_DK(bi)VIGSEKTQK_;_DKVIGSEK(bi)TQK_;_DK(bi)VIGSEKTQK_;_DKVIGSEK(bi)TQK_;_DKVIGSEK(bi)TQK_;_DKVIGSEK(bi)TQK_;_DK(bi)VIGSEKTQK_	0.00499773	2.09855	1.70772	21.2496	21.1152	21.1257	19.872	19.6266	18.8686
PF3D7_0113000	Plasmodium falciparum 3D7	glutamic acid-rich protein GARP	GARP	Previous IDs: MAL1P3.06;PFA0620c	1	0	Biotin (K);Oxidation (M)	0	1	2	530;533	NA	KMAKIEEAELQK	_K(bi)M(ox)AKIEEAELQK_;_KM(ox)AK(bi)IEEAELQK_;_KM(ox)AK(bi)IEEAELQK_;_K(bi)M(ox)AKIEEAELQK_;_K(bi)M(ox)AKIEEAELQK_;_K(bi)M(ox)AKIEEAELQK_;_K(bi)MAKIEEAELQK_;_KMAK(bi)IEEAELQK_;_KMAK(bi)IEEAELQK_;_KMAK(bi)IEEAELQK_;_KMAK(bi)IEEAELQK_;_KMAK(bi)IEEAELQK_;_KMAK(bi)IEEAELQK_;_KMAK(bi)IEEAELQK_;_KMAK(bi)IEEAELQK_;_KMAK(bi)IEEAELQK_;_KMAK(bi)IEEAELQK_;_KMAK(bi)IEEAELQK_;_KMAK(bi)IEEAELQK_;_KMAK(bi)IEEAE…	0.000490473	2.86224	1.70521	21.6338	21.9025	22.1508	20.2164	20.2956	20.0593
P37840	Homo sapiens (Human)	Alpha-synuclein (Non-A beta component of AD amyloid) (Non-A4 component of amyloid precursor) (NACP)	SNCA NACP PARK1	NA	0	1	Biotin (K)	0	1	2	43;45;34	NA	TKEGVLYVGSKTK	_TKEGVLYVGSK(bi)TK_;_TKEGVLYVGSK(bi)TK_;_TKEGVLYVGSK(bi)TK_;_TKEGVLYVGSKTK(bi)_;_TKEGVLYVGSK(bi)TK_;_TKEGVLYVGSK(bi)TK_;_TKEGVLYVGSK(bi)TK_;_TKEGVLYVGSK(bi)TK_;_TKEGVLYVGSK(bi)TK_;_TKEGVLYVGSK(bi)TK_;_TKEGVLYVGSKTK(bi)_;_TKEGVLYVGSK(bi)TK_;_TKEGVLYVGSKTK(bi)_;_TKEGVLYVGSK(bi)TK_;_TKEGVLYVGSKTK(bi)_;_TKEGVLYVGSK(bi)TK_;_TKEGVLYVGSK(bi)TK_;_TKEGVLYVGSK(bi)TK_;_TKEGVLYVGSK(bi)TK_;_TKEGVLYVGSK(bi)TK_…	0.0100384	1.84555	1.70486	30.4003	30.5293	29.9514	28.5747	29.1616	28.0301
Q9NTX5	Homo sapiens (Human)	Ethylmalonyl-CoA decarboxylase (EC 4.1.1.94) (Enoyl-CoA hydratase domain-containing protein 1) (Methylmalonyl-CoA decarboxylase) (MMCD)	ECHDC1	NA	0	1	Biotin (K)	0	1	1	13	NA	SLLKTASLSGR	_SLLK(bi)TASLSGR_;_SLLK(bi)TASLSGR_;_SLLK(bi)TASLSGR_;_SLLK(bi)TASLSGR_;_SLLK(bi)TASLSGR_;_SLLK(bi)TASLSGR_	0.00629062	2.01705	1.70349	21.1575	21.1387	21.316	19.4954	20.0565	18.9498
PF3D7_0113000	Plasmodium falciparum 3D7	glutamic acid-rich protein GARP	GARP	Previous IDs: MAL1P3.06;PFA0620c	1	0	2 Biotin (K)	0	2	3	533;530	NA	KMAKIEEAELQKQK	_KMAK(bi)IEEAELQKQK_;_KMAK(bi)IEEAELQKQK_;_KMAK(bi)IEEAELQKQK_;_K(bi)MAKIEEAELQKQK_;_K(bi)MAKIEEAELQKQK_;_KMAK(bi)IEEAELQKQK_;_KMAK(bi)IEEAELQKQK_;_KMAK(bi)IEEAELQKQK_;_KMAK(bi)IEEAELQKQK_;_K(bi)MAKIEEAELQKQK_;_KMAK(bi)IEEAELQKQK_;_K(bi)MAKIEEAELQKQK_;_K(bi)MAK(bi)IEEAELQKQK_;_K(bi)MAK(bi)IEEAELQKQK_;_K(bi)MAK(bi)IEEAELQKQK_;_K(bi)MAK(bi)IEEAELQKQK_;_K(bi)MAK(bi)IEEAELQKQK_;_K(bi)MAK(bi)IEEAELQKQ…	0.000621711	2.79466	1.68782	20.847	20.789	21.3276	19.2545	19.2901	19.3557
PF3D7_0500800	Plasmodium falciparum 3D7	mature parasite-infected erythrocyte surface antigen	MESA	Previous IDs: MAL5P1.9;PFE0040c	1	0	Biotin (K)	0	1	2	617;619	NA	QVEDGIKENDTEGNDKVK	_QVEDGIKENDTEGNDK(bi)VK_;_QVEDGIKENDTEGNDK(bi)VK_;_QVEDGIKENDTEGNDK(bi)VK_;_QVEDGIKENDTEGNDK(bi)VK_;_QVEDGIKENDTEGNDK(bi)VK_;_QVEDGIKENDTEGNDKVK(bi)_;_QVEDGIKENDTEGNDKVK(bi)_;_QVEDGIKENDTEGNDKVK(bi)_	0.00749368	1.95372	1.67737	21.6666	21.5317	21.1619	19.7224	20.3198	19.2858
PF3D7_1201000	Plasmodium falciparum 3D7	Plasmodium exported protein (PHISTb), unknown function	N/A	Previous IDs: 2277.t00010;MAL12P1.10;PFL0050c	1	0	Biotin (K)	0	1	1	525	NA	DETATINKDIK	_DETATINK(bi)DIK_;_DETATINK(bi)DIK_;_DETATINK(bi)DIK_;_DETATINK(bi)DIK_;_DETATINK(bi)DIK_;_DETATINK(bi)DIK_	0.0139168	1.72303	1.67341	20.8914	20.5628	20.9023	18.7996	18.6598	19.8769
PF3D7_0801000	Plasmodium falciparum 3D7	Plasmodium exported protein (PHISTc)	N/A	Previous IDs: PF08_0137	1	0	Biotin (K);Oxidation (M)	0	1	1	461	NA	NINNSMKIEK	_NINNSMK(bi)IEK_;_NINNSMK(bi)IEK_;_NINNSMK(bi)IEK_;_NINNSMK(bi)IEK_;_NINNSMK(bi)IEK_;_NINNSMK(bi)IEK_;_NINNSMK(bi)IEK_;_NINNSMK(bi)IEK_;_NINNSMK(bi)IEK_;_NINNSMK(bi)IEK_;_NINNSMK(bi)IEK_;_NINNSMK(bi)IEK_;_NINNSM(ox)K(bi)IEK_;_NINNSM(ox)K(bi)IEK_;_NINNSM(ox)K(bi)IEK_;_NINNSM(ox)K(bi)IEK_;_NINNSM(ox)K(bi)IEK_;_NINNSM(ox)K(bi)IEK_	0.193365	0.677186	1.67136	20.1346	20.5442	20.7596	20.2361	16.7504	19.4378
PF3D7_1149000	Plasmodium falciparum 3D7	antigen 332, DBL-like protein	Pf332	Previous IDs: PF11_0506;PF11_0507	1	0	Biotin (K)	0	1	2	6061	NA	NILKTSIDLDKNLLR	_NILK(bi)TSIDLDKNLLR_;_NILK(bi)TSIDLDKNLLR_;_NILK(bi)TSIDLDKNLLR_;_NILK(bi)TSIDLDKNLLR_;_NILK(bi)TSIDLDKNLLR_;_NILK(bi)TSIDLDKNLLR_;_NILK(bi)TSIDLDKNLLR_;_NILK(bi)TSIDLDKNLLR_;_NILK(bi)TSIDLDKNLLR_;_NILK(bi)TSIDLDKNLLR_;_NILK(bi)TSIDLDKNLLR_;_NILK(bi)TSIDLDKNLLR_;_NILK(bi)TSIDLDKNLLR_;_NILK(bi)TSIDLDKNLLR_;_NILK(bi)TSIDLDKNLLR_;_NILK(bi)TSIDLDKNLLR_;_NILK(bi)TSIDLDKNLLR_;_NILK(bi)TSIDLDKNLLR_;_NI…	0.000688605	2.76344	1.66474	24.7414	25.0971	24.5475	23.1146	23.0183	23.2589
P02730	Homo sapiens (Human)	Band 3 anion transport protein (Anion exchange protein 1) (AE 1) (Anion exchanger 1) (Solute carrier family 4 member 1) (CD antigen CD233)	SLC4A1 AE1 DI EPB3	NA	0	1	Biotin (K)	0	1	1	174	NA	HSHAGELEALGGVKPAVLTR	_HSHAGELEALGGVK(bi)PAVLTR_;_HSHAGELEALGGVK(bi)PAVLTR_;_HSHAGELEALGGVK(bi)PAVLTR_;_HSHAGELEALGGVK(bi)PAVLTR_;_HSHAGELEALGGVK(bi)PAVLTR_;_HSHAGELEALGGVK(bi)PAVLTR_;_HSHAGELEALGGVK(bi)PAVLTR_;_HSHAGELEALGGVK(bi)PAVLTR_;_HSHAGELEALGGVK(bi)PAVLTR_;_HSHAGELEALGGVK(bi)PAVLTR_;_HSHAGELEALGGVK(bi)PAVLTR_;_HSHAGELEALGGVK(bi)PAVLTR_;_HSHAGELEALGGVK(bi)PAVLTR_;_HSHAGELEALGGVK(bi)PAVLTR_;_HSHAGELEALGGVK(bi)PA…	6.75178e-05	3.38327	1.65712	23.7261	23.8284	23.5967	22.1807	21.9402	22.0591
PF3D7_1253400	Plasmodium falciparum 3D7	acyl-CoA synthetase	ACS3	Previous IDs: 2277.t00512;MAL12P1.509;PFL2570w	1	0	Biotin (K)	0	1	1	743	NA	EIYNNKLK	_EIYNNK(bi)LK_;_EIYNNK(bi)LK_;_EIYNNK(bi)LK_;_EIYNNK(bi)LK_;_EIYNNK(bi)LK_	0.000173671	3.13932	1.65162	20.396	20.3806	20.3685	18.5359	18.9551	18.6993
PF3D7_1479000	Plasmodium falciparum 3D7	acyl-CoA synthetase	ACS1a	Previous IDs: PF14_0761	1	0	Biotin (K)	0	1	1	747	NA	EIYNNKLK	_EIYNNK(bi)LK_;_EIYNNK(bi)LK_;_EIYNNK(bi)LK_;_EIYNNK(bi)LK_;_EIYNNK(bi)LK_	0.000173671	3.13932	1.65162	20.396	20.3806	20.3685	18.5359	18.9551	18.6993
PF3D7_0532400	Plasmodium falciparum 3D7	lysine-rich membrane-associated PHISTb protein	LyMP	Previous IDs: MAL5P1.315;PFE1605w	1	0	Biotin (K)	0	1	3	146;136	NA	DLKEHDLWNDHNKVPYTSVYMGVSVQDIDYILDKK	_DLKEHDLWNDHNK(bi)VPYTSVYMGVSVQDIDYILDKK_;_DLKEHDLWNDHNK(bi)VPYTSVYMGVSVQDIDYILDKK_;_DLKEHDLWNDHNK(bi)VPYTSVYMGVSVQDIDYILDKK_;_DLKEHDLWNDHNK(bi)VPYTSVYMGVSVQDIDYILDKK_;_DLKEHDLWNDHNK(bi)VPYTSVYMGVSVQDIDYILDKK_;_DLKEHDLWNDHNK(bi)VPYTSVYMGVSVQDIDYILDKK_;_DLKEHDLWNDHNK(bi)VPYTSVYMGVSVQDIDYILDKK_;_DLKEHDLWNDHNK(bi)VPYTSVYMGVSVQDIDYILDKK_;_DLKEHDLWNDHNK(bi)VPYTSVYMGVSVQDIDYILDKK_;_DLKEHDLWNDHNK(bi)VPY…	0.0163995	1.66131	1.6486	23.1399	24.5162	23.828	22.1794	21.9765	22.3823
PF3D7_0730800	Plasmodium falciparum 3D7	Plasmodium exported protein, unknown function	N/A	Previous IDs: MAL7P1.170;PF3D7_0730800.1;PF3D7_0730800.2	1	0	Biotin (K)	0	1	1	197	NA	LFKGFLNEDESK	_LFK(bi)GFLNEDESK_;_LFK(bi)GFLNEDESK_;_LFK(bi)GFLNEDESK_;_LFK(bi)GFLNEDESK_;_LFK(bi)GFLNEDESK_;_LFK(bi)GFLNEDESK_;_LFK(bi)GFLNEDESK_;_LFK(bi)GFLNEDESK_;_LFK(bi)GFLNEDESK_;_LFK(bi)GFLNEDESK_;_LFK(bi)GFLNEDESK_;_LFK(bi)GFLNEDESK_;_LFK(bi)GFLNEDESK_;_LFK(bi)GFLNEDESK_;_LFK(bi)GFLNEDESK_;_LFK(bi)GFLNEDESK_	0.00152097	2.51229	1.64114	23.0495	23.0584	23.0406	21.6775	21.5591	20.9884
PF3D7_0201600	Plasmodium falciparum 3D7	PHISTb domain-containing RESA-like protein 1	RLP1	Previous IDs: PF02_0016;PFB0080c	1	0	Biotin (K)	0	1	3	459	NA	SEKLIDDKWKK	_SEK(bi)LIDDKWKK_;_SEK(bi)LIDDKWKK_;_SEK(bi)LIDDKWKK_;_SEK(bi)LIDDKWKK_;_SEK(bi)LIDDKWKK_	0.0130007	1.74951	1.64078	20.1138	20.5638	20.5414	18.4251	19.4768	18.3947
P68871	Homo sapiens (Human)	Hemoglobin subunit beta (Beta-globin) (Hemoglobin beta chain) [Cleaved into: LVV-hemorphin-7; Spinorphin]	HBB	NA	0	1	Biotin (K)	0	1	1	9	NA	VHLTPEEKSAVTALWGK	_VHLTPEEK(bi)SAVTALWGK_;_VHLTPEEK(bi)SAVTALWGK_;_VHLTPEEK(bi)SAVTALWGK_;_VHLTPEEK(bi)SAVTALWGK_;_VHLTPEEK(bi)SAVTALWGK_;_VHLTPEEK(bi)SAVTALWGK_;_VHLTPEEK(bi)SAVTALWGK_;_VHLTPEEK(bi)SAVTALWGK_;_VHLTPEEK(bi)SAVTALWGK_;_VHLTPEEK(bi)SAVTALWGK_;_VHLTPEEK(bi)SAVTALWGK_;_VHLTPEEK(bi)SAVTALWGK_;_VHLTPEEK(bi)SAVTALWGK_;_VHLTPEEK(bi)SAVTALWGK_;_VHLTPEEK(bi)SAVTALWGK_;_VHLTPEEK(bi)SAVTALWGK_	0.00385353	2.19594	1.63763	24.0944	24.125	23.4535	21.9696	22.2594	22.531
PF3D7_0905400	Plasmodium falciparum 3D7	high molecular weight rhoptry protein 3	RhopH3	Previous IDs: PFI0265c	1	0	Biotin (K)	0	1	3	782	NA	TKDQDLEIELYKYMGPLKEQSK	_TKDQDLEIELYK(bi)YMGPLKEQSK_;_TKDQDLEIELYK(bi)YMGPLKEQSK_;_TKDQDLEIELYK(bi)YMGPLKEQSK_;_TKDQDLEIELYK(bi)YMGPLKEQSK_;_TKDQDLEIELYK(bi)YMGPLKEQSK_;_TKDQDLEIELYK(bi)YMGPLKEQSK_;_TKDQDLEIELYK(bi)YMGPLKEQSK_;_TKDQDLEIELYK(bi)YMGPLKEQSK_;_TKDQDLEIELYK(bi)YMGPLKEQSK_;_TKDQDLEIELYK(bi)YMGPLKEQSK_;_TKDQDLEIELYK(bi)YMGPLKEQSK_;_TKDQDLEIELYK(bi)YMGPLKEQSK_;_TKDQDLEIELYK(bi)YMGPLKEQSK_;_TKDQDLEIELYK(bi)YMGPL…	0.00483027	2.111	1.63497	23.6527	24.3775	23.4965	22.4004	22.064	22.1573
PF3D7_1033200	Plasmodium falciparum 3D7	early transcribed membrane protein 10.2	ETRAMP10.2	Previous IDs: PF10_0323	1	0	Biotin (K)	0	1	1	330	NA	SKGPSSPLR	_SK(bi)GPSSPLR_;_SK(bi)GPSSPLR_;_SK(bi)GPSSPLR_;_SK(bi)GPSSPLR_;_SK(bi)GPSSPLR_;_SK(bi)GPSSPLR_;_SK(bi)GPSSPLR_;_SK(bi)GPSSPLR_;_SK(bi)GPSSPLR_;_SK(bi)GPSSPLR_;_SK(bi)GPSSPLR_;_SK(bi)GPSSPLR_	0.00027456	3.02111	1.63353	22.3835	22.306	22.5537	20.5722	20.9669	20.8035
P00918	Homo sapiens (Human)	Carbonic anhydrase 2 (EC 4.2.1.1) (Carbonate dehydratase II) (Carbonic anhydrase C) (CAC) (Carbonic anhydrase II) (CA-II)	CA2	NA	0	1	Biotin (K)	0	1	2	158	NA	VGSAKPGLQKVVDVLDSIK	_VGSAKPGLQK(bi)VVDVLDSIK_;_VGSAKPGLQK(bi)VVDVLDSIK_;_VGSAKPGLQK(bi)VVDVLDSIK_;_VGSAKPGLQK(bi)VVDVLDSIK_;_VGSAKPGLQK(bi)VVDVLDSIK_;_VGSAKPGLQK(bi)VVDVLDSIK_;_VGSAKPGLQK(bi)VVDVLDSIK_;_VGSAKPGLQK(bi)VVDVLDSIK_;_VGSAKPGLQK(bi)VVDVLDSIK_;_VGSAKPGLQK(bi)VVDVLDSIK_;_VGSAKPGLQK(bi)VVDVLDSIK_	8.97749e-05	3.31354	1.63161	23.8994	23.7991	23.5658	22.1519	22.0718	22.1458
PF3D7_0202000	Plasmodium falciparum 3D7	knob-associated histidine-rich protein	KAHRP	Previous IDs: PF02_0020;PFB0100c	1	0	2 Biotin (K)	0	2	3	581;585;575	NA	EATKEASTSKGATKEASTTEGATK	_EATKEASTSK(bi)GATKEASTTEGATK_;_EATKEASTSK(bi)GATKEASTTEGATK_;_EATKEASTSK(bi)GATKEASTTEGATK_;_EATKEASTSK(bi)GATKEASTTEGATK_;_EATKEAS(ph)TSKGATK(bi)EASTTEGATK_;_EATKEAS(ph)TSKGATK(bi)EASTTEGATK_;_EATKEAS(ph)TSKGATK(bi)EASTTEGATK_;_EATKEAS(ph)TSKGATK(bi)EASTTEGATK_;_EATKEAS(ph)TSKGATK(bi)EASTTEGATK_;_EAT(ph)KEASTSKGATK(bi)EASTTEGATK_;_EATKEAS(ph)TSKGATK(bi)EASTTEGATK_;_EAT(ph)KEASTSKGATK(bi)EASTTEG…	0.00124458	2.57588	1.619	20.5105	20.2406	20.871	19.0396	18.955	18.7705
P37840	Homo sapiens (Human)	Alpha-synuclein (Non-A beta component of AD amyloid) (Non-A4 component of amyloid precursor) (NACP)	SNCA NACP PARK1	NA	0	1	Biotin (K)	0	1	1	12	NA	AKEGVVAAAEK	_AK(bi)EGVVAAAEK_;_AK(bi)EGVVAAAEK_;_AK(bi)EGVVAAAEK_;_AK(bi)EGVVAAAEK_;_AK(bi)EGVVAAAEK_;_AK(bi)EGVVAAAEK_;_AK(bi)EGVVAAAEK_;_AK(bi)EGVVAAAEK_;_AK(bi)EGVVAAAEK_;_AK(bi)EGVVAAAEK_;_AK(bi)EGVVAAAEK_;_AK(bi)EGVVAAAEK_	0.00714061	1.97082	1.61076	23.0748	23.2531	22.7139	21.4707	21.8429	20.896
Q08495	Homo sapiens (Human)	Dematin (Dematin actin-binding protein) (Erythrocyte membrane protein band 4.9)	DMTN DMT EPB49	NA	0	1	Biotin (K)	0	1	2	286	NA	SLPDRTPFHTSLHQGTSKSSSLPAYGR	_SLPDRTPFHTSLHQGTSK(bi)SSSLPAYGR_;_SLPDRTPFHTSLHQGTSK(bi)SSSLPAYGR_;_SLPDRTPFHTSLHQGTSK(bi)SSSLPAYGR_;_SLPDRTPFHTSLHQGTSK(bi)SSSLPAYGR_;_SLPDRTPFHTSLHQGTSK(bi)SSSLPAYGR_;_SLPDRTPFHTSLHQGTSK(bi)SSSLPAYGR_;_SLPDRTPFHTSLHQGTSK(bi)SSSLPAYGR_;_SLPDRTPFHTSLHQGTSK(bi)SSSLPAYGR_;_SLPDRTPFHTSLHQGTSK(bi)SSSLPAYGR_;_SLPDRTPFHTSLHQGTSK(bi)SSSLPAYGR_;_SLPDRTPFHTSLHQGTSK(bi)SSSLPAYGR_;_SLPDRTPFHTSLHQGTSK(bi)SS…	0.000188328	3.12108	1.60931	27.5809	27.5965	27.8973	26.0975	25.9633	26.1859
PF3D7_0730900	Plasmodium falciparum 3D7	EMP1-trafficking protein	PTP4	Previous IDs: MAL7P1.171	1	0	Biotin (K)	0	1	3	1226;1322;1418;1231;1327;1423	NA	MYNVNEKEEVPKIDRTK	_MYNVNEKEEVPK(bi)IDRTK_;_MYNVNEKEEVPK(bi)IDRTK_;_MYNVNEKEEVPKIDRTK(bi)_;_MYNVNEKEEVPK(bi)IDRTK_;_MYNVNEKEEVPK(bi)IDRTK_;_MYNVNEKEEVPKIDRTK(bi)_;_MYNVNEKEEVPK(bi)IDRTK_;_MYNVNEKEEVPK(bi)IDRTK_	0.00994675	1.84816	1.55969	20.8442	20.1648	20.5975	19.4776	18.5348	18.915
P11171	Homo sapiens (Human)	Protein 4.1 (P4.1) (4.1R) (Band 4.1) (EPB4.1) (Erythrocyte membrane protein band 4.1)	EPB41 E41P	NA	0	1	Biotin (K)	0	1	2	706	NA	NFMESVPEPRPSEWDKR	_NFM(ox)ESVPEPRPSEWDK(bi)R_;_NFM(ox)ESVPEPRPSEWDK(bi)R_;_NFM(ox)ESVPEPRPSEWDK(bi)R_;_NFM(ox)ESVPEPRPSEWDK(bi)R_;_NFM(ox)ESVPEPRPSEWDK(bi)R_;_NFM(ox)ESVPEPRPSEWDK(bi)R_;_NFMESVPEPRPSEWDK(bi)R_;_NFMESVPEPRPSEWDK(bi)R_;_NFMESVPEPRPSEWDK(bi)R_;_NFMESVPEPRPSEWDK(bi)R_;_NFMESVPEPRPSEWDK(bi)R_;_NFMESVPEPRPSEWDK(bi)R_;_NFMESVPEPRPSEWDK(bi)R_;_NFMESVPEPRPSEWDK(bi)R_;_NFMESVPEPRPSEWDK(bi)R_;_NFMESVPEPRPSEW…	0.000159119	3.16189	1.55396	24.4631	24.4796	24.258	22.783	23.0183	22.7376
PF3D7_0500800	Plasmodium falciparum 3D7	mature parasite-infected erythrocyte surface antigen	MESA	Previous IDs: MAL5P1.9;PFE0040c	1	0	Biotin (K);Oxidation (M)	0	1	1	199	NA	KHVNVMGESK	_K(bi)HVNVM(ox)GESK_;_K(bi)HVNVM(ox)GESK_;_K(bi)HVNVM(ox)GESK_;_K(bi)HVNVM(ox)GESK_;_K(bi)HVNVM(ox)GESK_;_K(bi)HVNVM(ox)GESK_;_K(bi)HVNVM(ox)GESK_;_K(bi)HVNVM(ox)GESK_;_K(bi)HVNVM(ox)GESK_;_K(bi)HVNVM(ox)GESK_;_K(bi)HVNVM(ox)GESK_;_K(bi)HVNVM(ox)GESK_;_K(bi)HVNVM(ox)GESK_;_K(bi)HVNVM(ox)GESK_;_K(bi)HVNVM(ox)GESK_;_K(bi)HVNVM(ox)GESK_;_K(bi)HVNVM(ox)GESK_;_K(bi)HVNVM(ox)GESK_;_K(bi)HVNVM(ox)GESK_;…	0.000787371	2.71722	1.55369	24.1335	24.3841	24.6901	22.8005	22.9553	22.7907
P29972	Homo sapiens (Human)	Aquaporin-1 (AQP-1) (Aquaporin-CHIP) (Urine water channel) (Water channel protein for red blood cells and kidney proximal tubule)	AQP1 CHIP28	NA	0	1	Biotin (K)	0	1	1	267	NA	VEMKPK	_VEMK(bi)PK_;_VEMK(bi)PK_;_VEMK(bi)PK_;_VEMK(bi)PK_;_VEMK(bi)PK_;_VEMK(bi)PK_;_VEMK(bi)PK_;_VEMK(bi)PK_;_VEMK(bi)PK_;_VEMK(bi)PK_;_VEMK(bi)PK_;_VEMK(bi)PK_;_VEMK(bi)PK_;_VEMK(bi)PK_;_VEMK(bi)PK_	0.00728068	1.96384	1.54419	23.0451	23.1484	22.4123	20.974	21.6748	21.3244
PF3D7_1039000	Plasmodium falciparum 3D7	serine/threonine protein kinase, FIKK family	FIKK10.2	Previous IDs: PF10_0380	1	0	Biotin (K)	0	1	2	804	NA	LKIKNPLEYLK	_LKIK(bi)NPLEYLK_;_LKIK(bi)NPLEYLK_;_LKIK(bi)NPLEYLK_;_LKIK(bi)NPLEYLK_;_LKIK(bi)NPLEYLK_;_LKIK(bi)NPLEYLK_;_LKIK(bi)NPLEYLK_;_LKIK(bi)NPLEYLK_;_LKIK(bi)NPLEYLK_;_LKIK(bi)NPLEYLK_;_LKIK(bi)NPLEYLK_;_LKIK(bi)NPLEYLK_;_LKIK(bi)NPLEYLK_;_LKIK(bi)NPLEYLK_;_LKIK(bi)NPLEYLK_;_LKIK(bi)NPLEYLK_;_LKIK(bi)NPLEYLK_;_LKIK(bi)NPLEYLK_;_LKIK(bi)NPLEYLK_;_LKIK(bi)NPLEYLK_;_LKIK(bi)NPLEYLK_;_LKIK(bi)NPLEYLK_;_LK…	0.000504922	2.85679	1.5331	25.0002	25.1791	24.7236	23.3477	23.3864	23.5696
PF3D7_0905400	Plasmodium falciparum 3D7	high molecular weight rhoptry protein 3	RhopH3	Previous IDs: PFI0265c	1	0	Biotin (K)	0	1	1	788	NA	YMGPLKEQSK	_YMGPLK(bi)EQSK_;_YMGPLK(bi)EQSK_;_YMGPLK(bi)EQSK_;_YMGPLK(bi)EQSK_;_YMGPLK(bi)EQSK_;_YMGPLK(bi)EQSK_;_YMGPLK(bi)EQSK_;_YMGPLK(bi)EQSK_;_YMGPLK(bi)EQSK_;_YMGPLK(bi)EQSK_;_YMGPLK(bi)EQSK_;_YMGPLK(bi)EQSK_;_YM(ox)GPLK(bi)EQSK_;_YM(ox)GPLK(bi)EQSK_;_YM(ox)GPLK(bi)EQSK_;_YM(ox)GPLK(bi)EQSK_;_YM(ox)GPLK(bi)EQSK_;_YM(ox)GPLK(bi)EQSK_	0.000577727	2.81296	1.5325	24.844	24.5923	25.0621	23.1743	23.2977	23.4288
P37840	Homo sapiens (Human)	Alpha-synuclein (Non-A beta component of AD amyloid) (Non-A4 component of amyloid precursor) (NACP)	SNCA NACP PARK1	NA	0	1	Biotin (K)	0	1	1	34	NA	TKEGVLYVGSK	_TK(bi)EGVLYVGSK_;_TK(bi)EGVLYVGSK_;_TK(bi)EGVLYVGSK_;_TK(bi)EGVLYVGSK_;_TK(bi)EGVLYVGSK_;_TK(bi)EGVLYVGSK_;_TK(bi)EGVLYVGSK_;_TK(bi)EGVLYVGSK_;_TK(bi)EGVLYVGSK_;_TK(bi)EGVLYVGSK_;_TK(bi)EGVLYVGSK_;_TK(bi)EGVLYVGSK_	0.00192658	2.43503	1.51526	26.8033	27.0397	26.573	25.2887	25.5679	25.0137
Q16143	Homo sapiens (Human)	Beta-synuclein	SNCB	NA	0	1	Biotin (K)	0	1	1	34	NA	TKEGVLYVGSK	_TK(bi)EGVLYVGSK_;_TK(bi)EGVLYVGSK_;_TK(bi)EGVLYVGSK_;_TK(bi)EGVLYVGSK_;_TK(bi)EGVLYVGSK_;_TK(bi)EGVLYVGSK_;_TK(bi)EGVLYVGSK_;_TK(bi)EGVLYVGSK_;_TK(bi)EGVLYVGSK_;_TK(bi)EGVLYVGSK_;_TK(bi)EGVLYVGSK_;_TK(bi)EGVLYVGSK_	0.00192658	2.43503	1.51526	26.8033	27.0397	26.573	25.2887	25.5679	25.0137
PF3D7_1253400	Plasmodium falciparum 3D7	acyl-CoA synthetase	ACS3	Previous IDs: 2277.t00512;MAL12P1.509;PFL2570w	1	0	Biotin (K)	0	1	1	538	NA	ATDTLPKGELLIK	_ATDTLPK(bi)GELLIK_;_ATDTLPK(bi)GELLIK_;_ATDTLPK(bi)GELLIK_;_ATDTLPK(bi)GELLIK_;_ATDTLPK(bi)GELLIK_;_ATDTLPK(bi)GELLIK_;_ATDTLPK(bi)GELLIK_;_ATDTLPK(bi)GELLIK_;_ATDTLPK(bi)GELLIK_	0.00154833	2.50651	1.51381	21.654	21.997	22.1767	20.214	20.4288	20.6436
PF3D7_1372400	Plasmodium falciparum 3D7	acyl-CoA synthetase	ACS4	Previous IDs: MAL13P1.485	1	0	Biotin (K)	0	1	1	538	NA	ATDTLPKGELLIK	_ATDTLPK(bi)GELLIK_;_ATDTLPK(bi)GELLIK_;_ATDTLPK(bi)GELLIK_;_ATDTLPK(bi)GELLIK_;_ATDTLPK(bi)GELLIK_;_ATDTLPK(bi)GELLIK_;_ATDTLPK(bi)GELLIK_;_ATDTLPK(bi)GELLIK_;_ATDTLPK(bi)GELLIK_	0.00154833	2.50651	1.51381	21.654	21.997	22.1767	20.214	20.4288	20.6436
PF3D7_1479000	Plasmodium falciparum 3D7	acyl-CoA synthetase	ACS1a	Previous IDs: PF14_0761	1	0	Biotin (K)	0	1	1	542	NA	ATDTLPKGELLIK	_ATDTLPK(bi)GELLIK_;_ATDTLPK(bi)GELLIK_;_ATDTLPK(bi)GELLIK_;_ATDTLPK(bi)GELLIK_;_ATDTLPK(bi)GELLIK_;_ATDTLPK(bi)GELLIK_;_ATDTLPK(bi)GELLIK_;_ATDTLPK(bi)GELLIK_;_ATDTLPK(bi)GELLIK_	0.00154833	2.50651	1.51381	21.654	21.997	22.1767	20.214	20.4288	20.6436
PF3D7_0500800	Plasmodium falciparum 3D7	mature parasite-infected erythrocyte surface antigen	MESA	Previous IDs: MAL5P1.9;PFE0040c	1	0	Biotin (K)	0	1	3	1144;1140	NA	RVNKEVNKR	_RVNKEVNK(bi)R_;_RVNK(bi)EVNKR_;_RVNK(bi)EVNKR_;_RVNKEVNK(bi)R_;_RVNKEVNK(bi)R_;_RVNK(bi)EVNKR_;_RVNKEVNK(bi)R_;_RVNK(bi)EVNKR_;_RVNK(bi)EVNKR_;_RVNK(bi)EVNKR_;_RVNKEVNK(bi)R_	0.0247618	1.50541	1.49446	20.9407	20.2642	21.0411	18.9597	18.8524	19.9505
PF3D7_1149400	Plasmodium falciparum 3D7	Plasmodium exported protein, unknown function	N/A	Previous IDs: PF11_0511	1	0	Biotin (K)	0	1	3	162	NA	LSKFIDPYINKEDDEKSK	_LSK(bi)FIDPYINKEDDEKSK_;_LSK(bi)FIDPYINKEDDEKSK_;_LSK(bi)FIDPYINKEDDEKSK_;_LSK(bi)FIDPYINKEDDEKSK_;_LSK(bi)FIDPYINKEDDEKSK_;_LSK(bi)FIDPYINKEDDEKSK_;_LSK(bi)FIDPYINKEDDEKSK_;_LSK(bi)FIDPYINKEDDEKSK_;_LSK(bi)FIDPYINKEDDEKSK_;_LSK(bi)FIDPYINKEDDEKSK_;_LSK(bi)FIDPYINKEDDEKSK_	0.00588112	2.04181	1.49034	23.328	23.3541	23.3801	21.8637	21.382	22.3454
O60488	Homo sapiens (Human)	Long-chain-fatty-acid--CoA ligase 4 (EC 6.2.1.3) (Arachidonate--CoA ligase) (EC 6.2.1.15) (Long-chain acyl-CoA synthetase 4) (LACS 4)	ACSL4 ACS4 FACL4 LACS4	NA	0	1	Biotin (K)	0	1	3	670	NA	EIREAANAMKLERFEIPIK	_EIREAANAMKLERFEIPIK(bi)_;_EIREAANAMKLERFEIPIK(bi)_;_EIREAANAMKLERFEIPIK(bi)_;_EIREAANAMKLERFEIPIK(bi)_;_EIREAANAMKLERFEIPIK(bi)_;_EIREAANAMKLERFEIPIK(bi)_;_EIREAANAMKLERFEIPIK(bi)_	0.334328	0.449822	1.48912	23.2111	25.5281	20.894	22.1236	21.3204	21.722
PF3D7_1016400	Plasmodium falciparum 3D7	serine/threonine protein kinase, FIKK family	FIKK10.1	Previous IDs: PF10_0160	1	0	Biotin (K)	0	1	2	162;158	NA	ALTKIELKDNLNR	_ALTKIELK(bi)DNLNR_;_ALTKIELK(bi)DNLNR_;_ALTKIELK(bi)DNLNR_;_ALTKIELK(bi)DNLNR_;_ALTKIELK(bi)DNLNR_;_ALTKIELK(bi)DNLNR_;_ALTKIELK(bi)DNLNR_;_ALTKIELK(bi)DNLNR_;_ALTKIELK(bi)DNLNR_;_ALTKIELK(bi)DNLNR_;_ALTKIELK(bi)DNLNR_;_ALTKIELK(bi)DNLNR_;_ALTKIELK(bi)DNLNR_;_ALTKIELK(bi)DNLNR_;_ALTKIELK(bi)DNLNR_;_ALTKIELK(bi)DNLNR_;_ALTK(bi)IELKDNLNR_;_ALTKIELK(bi)DNLNR_	0.0100897	1.84426	1.48904	24.4814	24.085	24.4705	22.3835	22.7824	23.4039
PF3D7_0532300	Plasmodium falciparum 3D7	Plasmodium exported protein (PHISTb), unknown function	N/A	Previous IDs: MAL5P1.314;PFE1600w	1	0	Biotin (K)	0	1	2	338;335;332	NA	GIDLSNVNYDDHFKNGKFLK	_GIDLSNVNYDDHFKNGKFLK(bi)_;_GIDLSNVNYDDHFKNGKFLK(bi)_;_GIDLSNVNYDDHFKNGK(bi)FLK_;_GIDLSNVNYDDHFKNGK(bi)FLK_;_GIDLSNVNYDDHFKNGK(bi)FLK_;_GIDLSNVNYDDHFKNGK(bi)FLK_;_GIDLSNVNYDDHFKNGKFLK(bi)_;_GIDLSNVNYDDHFKNGKFLK(bi)_;_GIDLSNVNYDDHFKNGKFLK(bi)_;_GIDLSNVNYDDHFKNGKFLK(bi)_;_GIDLSNVNYDDHFKNGK(bi)FLK_;_GIDLSNVNYDDHFKNGK(bi)FLK_;_GIDLSNVNYDDHFKNGKFLK(bi)_;_GIDLSNVNYDDHFKNGK(bi)FLK_;_GIDLSNVNYDDHFKNGK(bi…	0.0561152	1.18121	1.48651	27.7287	26.008	27.5913	25.5386	25.7828	25.5471
PF3D7_1477500	Plasmodium falciparum 3D7	Plasmodium exported protein (PHISTb), unknown function	N/A	Previous IDs: PF14_0746	1	0	Biotin (K)	0	1	1	484	NA	MLKQFVDEIR	_MLK(bi)QFVDEIR_;_MLK(bi)QFVDEIR_;_MLK(bi)QFVDEIR_;_MLK(bi)QFVDEIR_;_MLK(bi)QFVDEIR_;_MLK(bi)QFVDEIR_;_MLK(bi)QFVDEIR_;_MLK(bi)QFVDEIR_;_MLK(bi)QFVDEIR_;_MLK(bi)QFVDEIR_;_MLK(bi)QFVDEIR_;_M(ox)LK(bi)QFVDEIR_;_M(ox)LK(bi)QFVDEIR_;_M(ox)LK(bi)QFVDEIR_;_M(ox)LK(bi)QFVDEIR_	0.00500048	2.09855	1.47657	22.1768	23.0743	22.6256	21.0628	21.2351	21.149
PF3D7_0202100	Plasmodium falciparum 3D7	liver stage associated protein 2	LSAP2	Previous IDs: PF02_0021;PFB0105c	1	0	Biotin (K)	0	1	1	98	NA	GSGSEKNVYLSNK	_GSGSEK(bi)NVYLSNK_;_GSGSEK(bi)NVYLSNK_;_GSGSEK(bi)NVYLSNK_;_GSGSEK(bi)NVYLSNK_;_GSGSEK(bi)NVYLSNK_;_GSGSEK(bi)NVYLSNK_;_GSGSEK(bi)NVYLSNK_;_GSGSEK(bi)NVYLSNK_;_GSGSEK(bi)NVYLSNK_;_GSGSEK(bi)NVYLSNK_;_GSGSEK(bi)NVYLSNK_;_GSGSEK(bi)NVYLSNK_;_GSGSEK(bi)NVYLSNK_;_GSGSEK(bi)NVYLSNK_;_GSGSEK(bi)NVYLSNK_;_GSGSEK(bi)NVYLSNK_;_GSGSEK(bi)NVYLSNK_;_GSGSEK(bi)NVYLSNK_;_GSGSEK(bi)NVYLSNK_	1.54591e-05	3.74297	1.4753	24.4874	24.3166	24.4999	22.955	22.9553	22.9677
Q08495	Homo sapiens (Human)	Dematin (Dematin actin-binding protein) (Erythrocyte membrane protein band 4.9)	DMTN DMT EPB49	NA	0	1	Biotin (K);Oxidation (M)	0	1	2	250;254	NA	VTSNLGKMILKEEMEK	_VTSNLGK(bi)M(ox)ILKEEMEK_;_VTSNLGK(bi)MILKEEM(ox)EK_;_VTSNLGK(bi)M(ox)ILKEEMEK_;_VTSNLGK(bi)M(ox)ILKEEMEK_;_VTSNLGK(bi)M(ox)ILKEEMEK_;_VTSNLGK(bi)M(ox)ILKEEMEK_;_VTSNLGK(bi)M(ox)ILKEEMEK_;_VTSNLGK(bi)M(ox)ILKEEMEK_;_VTSNLGK(bi)M(ox)ILKEEMEK_;_VTSNLGK(bi)MILKEEM(ox)EK_;_VTSNLGK(bi)M(ox)ILKEEMEK_;_VTSNLGK(bi)MILKEEM(ox)EK_;_VTSNLGK(bi)M(ox)ILKEEMEK_;_VTSNLGK(bi)MILKEEM(ox)EK_;_VTSNLGK(bi)MILKEEM(o…	0.0387462	1.33168	1.47146	23.5291	25.1484	24.6816	22.8706	22.9816	23.0926
P37840	Homo sapiens (Human)	Alpha-synuclein (Non-A beta component of AD amyloid) (Non-A4 component of amyloid precursor) (NACP)	SNCA NACP PARK1	NA	0	1	Biotin (K)	0	1	1	45	NA	TKEGVVHGVATVAEK	_TK(bi)EGVVHGVATVAEK_;_TK(bi)EGVVHGVATVAEK_;_TK(bi)EGVVHGVATVAEK_;_TK(bi)EGVVHGVATVAEK_;_TK(bi)EGVVHGVATVAEK_;_TK(bi)EGVVHGVATVAEK_;_TK(bi)EGVVHGVATVAEK_;_TK(bi)EGVVHGVATVAEK_;_TK(bi)EGVVHGVATVAEK_;_TK(bi)EGVVHGVATVAEK_;_TK(bi)EGVVHGVATVAEK_;_TK(bi)EGVVHGVATVAEK_;_TK(bi)EGVVHGVATVAEK_;_TK(bi)EGVVHGVATVAEK_;_TK(bi)EGVVHGVATVAEK_;_TK(bi)EGVVHGVATVAEK_;_TK(bi)EGVVHGVATVAEK_;_TK(bi)EGVVHGVATVAEK_;_TK…	0.0148983	1.69562	1.46563	25.1179	24.9312	24.1634	23.3879	23.5573	22.8703
P37802	Homo sapiens (Human)	Transgelin-2 (Epididymis tissue protein Li 7e) (SM22-alpha homolog)	TAGLN2 KIAA0120 CDABP0035	NA	0	1	Biotin (K)	0	1	1	171	NA	NFSDNQLQEGKNVIGLQMGTNR	_NFSDNQLQEGK(bi)NVIGLQM(ox)GTNR_;_NFSDNQLQEGK(bi)NVIGLQM(ox)GTNR_;_NFSDNQLQEGK(bi)NVIGLQM(ox)GTNR_;_NFSDNQLQEGK(bi)NVIGLQM(ox)GTNR_;_NFSDNQLQEGK(bi)NVIGLQM(ox)GTNR_;_NFSDNQLQEGK(bi)NVIGLQM(ox)GTNR_;_NFSDNQLQEGK(bi)NVIGLQM(ox)GTNR_;_NFSDNQLQEGK(bi)NVIGLQM(ox)GTNR_;_NFSDNQLQEGK(bi)NVIGLQMGTNR_;_NFSDNQLQEGK(bi)NVIGLQMGTNR_;_NFSDNQLQEGK(bi)NVIGLQMGTNR_;_NFSDNQLQEGK(bi)NVIGLQMGTNR_;_NFSDNQLQEGK(bi)NVI…	0.00268713	2.32263	1.46332	24.1865	24.9085	24.3575	23.0924	22.9808	22.9894
PF3D7_1149000	Plasmodium falciparum 3D7	antigen 332, DBL-like protein	Pf332	Previous IDs: PF11_0506;PF11_0507	1	0	Biotin (K)	0	1	1	6068	NA	TSIDLDKNLLR	_TSIDLDK(bi)NLLR_;_TSIDLDK(bi)NLLR_;_TSIDLDK(bi)NLLR_;_TSIDLDK(bi)NLLR_;_TSIDLDK(bi)NLLR_;_TSIDLDK(bi)NLLR_;_TSIDLDK(bi)NLLR_;_TSIDLDK(bi)NLLR_;_TSIDLDK(bi)NLLR_;_TSIDLDK(bi)NLLR_;_TSIDLDK(bi)NLLR_;_TSIDLDK(bi)NLLR_	0.00108579	2.61538	1.43891	23.8627	23.7178	24.1511	22.2617	22.5006	22.6525
PF3D7_0801000	Plasmodium falciparum 3D7	Plasmodium exported protein (PHISTc)	N/A	Previous IDs: PF08_0137	1	0	Biotin (K)	0	1	3	488;479	NA	SNEQVKNTSVSKSCDIIKPSK	_SNEQVKNTSVSKSCDIIKPSK(bi)_;_SNEQVKNTSVSK(bi)SCDIIKPSK_;_SNEQVKNTSVSK(bi)SCDIIKPSK_;_SNEQVKNTSVSK(bi)SCDIIKPSK_;_SNEQVKNTSVSK(bi)SCDIIKPSK_;_SNEQVKNTSVSK(bi)SCDIIKPSK_;_SNEQVKNTSVSK(bi)SCDIIKPSK_;_SNEQVKNTSVSK(bi)SCDIIKPSK_;_SNEQVKNTSVSK(bi)SCDIIKPSK_;_SNEQVKNTSVSK(bi)SCDIIKPSK_;_SNEQVKNTSVSK(bi)SCDIIKPSK_;_SNEQVKNTSVSK(bi)SCDIIKPSK_;_SNEQVKNTSVSK(bi)SCDIIKPSK_;_SNEQVKNTSVSK(bi)SCDIIKPSK_;_SNEQVK…	0.033288	1.38977	1.43724	23.093	22.7938	22.305	20.6022	21.9444	21.3336
PF3D7_0201900	Plasmodium falciparum 3D7	erythrocyte membrane protein 3	EMP3	Previous IDs: PF02_0019;PFB0095c	1	0	Biotin (K)	0	1	1	2408	NA	NKPTDGLK	_NK(bi)PTDGLK_;_NK(bi)PTDGLK_;_NK(bi)PTDGLK_;_NK(bi)PTDGLK_;_NK(bi)PTDGLK_;_NK(bi)PTDGLK_	0.0173341	1.63933	1.43059	20.0372	20.5638	20.2212	18.2757	19.4233	18.8314
PF3D7_0201600	Plasmodium falciparum 3D7	PHISTb domain-containing RESA-like protein 1	RLP1	Previous IDs: PF02_0016;PFB0080c	1	0	Biotin (K)	0	1	3	479;476;480	NA	EIRDKPIKK	_EIRDKPIK(bi)K_;_EIRDK(bi)PIKK_;_EIRDK(bi)PIKK_;_EIRDKPIK(bi)K_;_EIRDK(bi)PIKK_;_EIRDK(bi)PIKK_;_EIRDK(bi)PIKK_;_EIRDK(bi)PIKK_;_EIRDKPIK(bi)K_;_EIRDKPIK(bi)K_;_EIRDKPIK(bi)K_;_EIRDKPIK(bi)K_;_EIRDK(bi)PIK(bi)K_;_EIRDK(bi)PIKK(bi)_;_EIRDK(bi)PIK(bi)K_;_EIRDK(bi)PIK(bi)K_	0.057636	1.17074	1.42952	21.2789	20.3867	20.2081	20.0522	18.7549	18.7781
PF3D7_1200700	Plasmodium falciparum 3D7	acyl-CoA synthetase	ACS7	Previous IDs: 2277.t00007;MAL12P1.7;PFL0035c	1	0	Biotin (K)	0	1	2	880	NA	TVQKQLRK	_TVQK(bi)QLRK_;_TVQK(bi)QLRK_;_TVQK(bi)QLRK_;_TVQK(bi)QLRK_;_TVQK(bi)QLRK_;_TVQK(bi)QLRK_	0.0109504	1.81282	1.41827	20.3953	19.7746	20.2233	18.4281	19.2247	18.4856
PF3D7_0936800	Plasmodium falciparum 3D7	Plasmodium exported protein (PHISTc), unknown function	N/A	Previous IDs: PFI1780w	1	0	Biotin (K)	0	1	1	267	NA	GIFAKGYLGEVESETIK	_GIFAK(bi)GYLGEVESETIK_;_GIFAK(bi)GYLGEVESETIK_;_GIFAK(bi)GYLGEVESETIK_;_GIFAK(bi)GYLGEVESETIK_;_GIFAK(bi)GYLGEVESETIK_;_GIFAK(bi)GYLGEVESETIK_;_GIFAK(bi)GYLGEVESETIK_;_GIFAK(bi)GYLGEVESETIK_;_GIFAK(bi)GYLGEVESETIK_;_GIFAK(bi)GYLGEVESETIK_;_GIFAK(bi)GYLGEVESETIK_;_GIFAK(bi)GYLGEVESETIK_;_GIFAK(bi)GYLGEVESETIK_;_GIFAK(bi)GYLGEVESETIK_;_GIFAK(bi)GYLGEVESETIK_;_GIFAK(bi)GYLGEVESETIK_;_GIFAK(bi)GYLGE…	0.0606778	1.15142	1.40568	25.2412	25.5192	23.8626	23.7695	23.4878	23.1487
Q00013	Homo sapiens (Human)	55 kDa erythrocyte membrane protein (p55) (Membrane protein, palmitoylated 1)	MPP1 DXS552E EMP55	NA	0	1	Biotin (K)	0	1	2	141	NA	AMKETKGMISLK	_AMKETK(bi)GMISLK_;_AMKETK(bi)GMISLK_;_AMKETK(bi)GMISLK_;_AMKETK(bi)GMISLK_;_AMKETK(bi)GMISLK_	0.0770097	1.055	1.40554	21.8187	21.1435	20.0679	19.5388	19.1137	20.161
P11171	Homo sapiens (Human)	Protein 4.1 (P4.1) (4.1R) (Band 4.1) (EPB4.1) (Erythrocyte membrane protein band 4.1)	EPB41 E41P	NA	0	1	Biotin (K)	0	1	3	690;706	NA	KNFMESVPEPRPSEWDKR	_K(bi)NFM(ox)ESVPEPRPSEWDKR_;_K(bi)NFM(ox)ESVPEPRPSEWDKR_;_K(bi)NFM(ox)ESVPEPRPSEWDKR_;_K(bi)NFM(ox)ESVPEPRPSEWDKR_;_K(bi)NFM(ox)ESVPEPRPSEWDKR_;_K(bi)NFM(ox)ESVPEPRPSEWDKR_;_K(bi)NFM(ox)ESVPEPRPSEWDKR_;_K(bi)NFM(ox)ESVPEPRPSEWDKR_;_K(bi)NFM(ox)ESVPEPRPSEWDKR_;_K(bi)NFM(ox)ESVPEPRPSEWDKR_;_K(bi)NFM(ox)ESVPEPRPSEWDKR_;_K(bi)NFM(ox)ESVPEPRPSEWDKR_;_K(bi)NFM(ox)ESVPEPRPSEWDKR_;_K(bi)NFM(ox)ESVPEPRPS…	0.000865838	2.68839	1.38186	28.1564	28.0553	27.6579	26.6282	26.5573	26.5386
PF3D7_0202000	Plasmodium falciparum 3D7	knob-associated histidine-rich protein	KAHRP	Previous IDs: PF02_0020;PFB0100c	1	0	Biotin (K)	0	1	3	473	NA	SDGSKAHEKKENETK	_SDGSK(bi)AHEKKENETK_;_SDGSK(bi)AHEKKENETK_;_SDGSK(bi)AHEKKENETK_;_SDGSK(bi)AHEKKENETK_;_SDGSK(bi)AHEKKENETK_;_SDGSK(bi)AHEKKENETK_;_SDGSK(bi)AHEKKENETK_;_SDGSK(bi)AHEKKENETK_	0.0324127	1.39856	1.38114	20.5143	19.3834	20.0241	18.061	18.9991	18.7183
PF3D7_0935900	Plasmodium falciparum 3D7	ring-exported protein 1	REX1	Previous IDs: PFI1735c	1	0	Biotin (K)	0	1	2	624	NA	SKNESQTETNNTWKK	_SK(bi)NESQTETNNTWKK_;_SK(bi)NESQTETNNTWKK_;_SK(bi)NESQTETNNTWKK_;_SK(bi)NESQTETNNTWKK_;_SK(bi)NESQTETNNTWKK_;_SK(bi)NESQTETNNTWKK_;_SK(bi)NESQTETNNTWKK_;_SK(bi)NESQTETNNTWKK_;_SK(bi)NESQTETNNTWKK_;_SK(bi)NESQTETNNTWKK_;_SK(bi)NESQTETNNTWKK_	0.00417561	2.1664	1.38108	19.6794	19.8989	20.4624	18.6325	18.68	18.585
PF3D7_0201800	Plasmodium falciparum 3D7	knob associated heat shock protein 40	KAHsp40	Previous IDs: PF02_0018;PFB0090c	1	0	Biotin (K)	0	1	2	119	NA	WHPDKHLNAASKK	_WHPDK(bi)HLNAASKK_;_WHPDK(bi)HLNAASKK_;_WHPDK(bi)HLNAASKK_;_WHPDK(bi)HLNAASKK_;_WHPDK(bi)HLNAASKK_;_WHPDK(bi)HLNAASKK_;_WHPDK(bi)HLNAASKK_;_WHPDK(bi)HLNAASKK_;_WHPDK(bi)HLNAASKK_;_WHPDK(bi)HLNAASKK_;_WHPDK(bi)HLNAASKK_;_WHPDK(bi)HLNAASKK_;_WHPDK(bi)HLNAASKK_;_WHPDK(bi)HLNAASKK_	0.0858882	1.00946	1.37934	24.0378	23.7386	22.1035	21.755	22.0729	21.9139
Q13177	Homo sapiens (Human)	Serine/threonine-protein kinase PAK 2 (EC 2.7.11.1) (Gamma-PAK) (PAK65) (S6/H4 kinase) (p21-activated kinase 2) (PAK-2) (p58) [Cleaved into: PAK-2p27 (p27); PAK-2p34 (p34) (C-t-PAK2)]	PAK2	NA	0	1	Biotin (K)	0	1	1	52	NA	HKIISIFSGTEK	_HK(bi)IISIFSGTEK_;_HK(bi)IISIFSGTEK_;_HK(bi)IISIFSGTEK_;_HK(bi)IISIFSGTEK_;_HK(bi)IISIFSGTEK_;_HK(bi)IISIFSGTEK_;_HK(bi)IISIFSGTEK_;_HK(bi)IISIFSGTEK_;_HK(bi)IISIFSGTEK_;_HK(bi)IISIFSGTEK_;_HK(bi)IISIFSGTEK_;_HK(bi)IISIFSGTEK_;_HK(bi)IISIFSGTEK_;_HK(bi)IISIFSGTEK_;_HK(bi)IISIFSGTEK_;_HK(bi)IISIFSGTEK_;_HK(bi)IISIFSGTEK_;_HK(bi)IISIFSGTEK_;_HK(bi)IISIFSGTEK_;_HK(bi)IISIFSGTEK_;_HK(bi)IISIFSGTEK_;…	0.161869	0.749443	1.37492	23.4692	24.9624	24.6558	21.6717	23.7553	23.5357
Q99808	Homo sapiens (Human)	Equilibrative nucleoside transporter 1 (Equilibrative nitrobenzylmercaptopurine riboside-sensitive nucleoside transporter) (Equilibrative NBMPR-sensitive nucleoside transporter) (Nucleoside transporter, es-type) (Solute carrier family 29 member 1)	SLC29A1 ENT1	NA	0	1	Biotin (K)	0	1	2	255	NA	LEGPGEQETKLDLISKGEEPR	_LEGPGEQETKLDLISK(bi)GEEPR_;_LEGPGEQETKLDLISK(bi)GEEPR_;_LEGPGEQETKLDLISK(bi)GEEPR_;_LEGPGEQETKLDLISK(bi)GEEPR_;_LEGPGEQETKLDLISK(bi)GEEPR_;_LEGPGEQETKLDLISK(bi)GEEPR_;_LEGPGEQETKLDLISK(bi)GEEPR_;_LEGPGEQETKLDLISK(bi)GEEPR_;_LEGPGEQETKLDLISK(bi)GEEPR_;_LEGPGEQETKLDLISK(bi)GEEPR_;_LEGPGEQETKLDLISK(bi)GEEPR_;_LEGPGEQETKLDLISK(bi)GEEPR_;_LEGPGEQETKLDLISK(bi)GEEPR_	0.00109567	2.61347	1.36331	23.3145	22.9618	22.8772	21.8463	21.5294	21.6879
P02042	Homo sapiens (Human)	Hemoglobin subunit delta (Delta-globin) (Hemoglobin delta chain)	HBD	NA	0	1	Biotin (K)	0	1	1	145	NA	VVAGVANALAHKYH	_VVAGVANALAHK(bi)YH_;_VVAGVANALAHK(bi)YH_;_VVAGVANALAHK(bi)YH_;_VVAGVANALAHK(bi)YH_;_VVAGVANALAHK(bi)YH_;_VVAGVANALAHK(bi)YH_;_VVAGVANALAHK(bi)YH_;_VVAGVANALAHK(bi)YH_;_VVAGVANALAHK(bi)YH_;_VVAGVANALAHK(bi)YH_;_VVAGVANALAHK(bi)YH_;_VVAGVANALAHK(bi)YH_;_VVAGVANALAHK(bi)YH_;_VVAGVANALAHK(bi)YH_;_VVAGVANALAHK(bi)YH_;_VVAGVANALAHK(bi)YH_;_VVAGVANALAHK(bi)YH_;_VVAGVANALAHK(bi)YH_;_VVAGVANALAHK(bi)YH_;…	0.000602921	2.80126	1.35495	26.4273	26.0891	26.0653	24.7847	24.984	24.7482
P68871	Homo sapiens (Human)	Hemoglobin subunit beta (Beta-globin) (Hemoglobin beta chain) [Cleaved into: LVV-hemorphin-7; Spinorphin]	HBB	NA	0	1	Biotin (K)	0	1	1	145	NA	VVAGVANALAHKYH	_VVAGVANALAHK(bi)YH_;_VVAGVANALAHK(bi)YH_;_VVAGVANALAHK(bi)YH_;_VVAGVANALAHK(bi)YH_;_VVAGVANALAHK(bi)YH_;_VVAGVANALAHK(bi)YH_;_VVAGVANALAHK(bi)YH_;_VVAGVANALAHK(bi)YH_;_VVAGVANALAHK(bi)YH_;_VVAGVANALAHK(bi)YH_;_VVAGVANALAHK(bi)YH_;_VVAGVANALAHK(bi)YH_;_VVAGVANALAHK(bi)YH_;_VVAGVANALAHK(bi)YH_;_VVAGVANALAHK(bi)YH_;_VVAGVANALAHK(bi)YH_;_VVAGVANALAHK(bi)YH_;_VVAGVANALAHK(bi)YH_;_VVAGVANALAHK(bi)YH_;…	0.000602921	2.80126	1.35495	26.4273	26.0891	26.0653	24.7847	24.984	24.7482
PF3D7_0936800	Plasmodium falciparum 3D7	Plasmodium exported protein (PHISTc), unknown function	N/A	Previous IDs: PFI1780w	1	0	Biotin (K)	0	1	2	322	NA	SQQQKVQPPKSQQQK	_SQQQK(bi)VQPPKSQQQK_;_SQQQK(bi)VQPPKSQQQK_;_SQQQK(bi)VQPPKSQQQK_;_SQQQK(bi)VQPPKSQQQK_;_SQQQK(bi)VQPPKSQQQK_;_SQQQK(bi)VQPPKSQQQK_;_SQQQK(bi)VQPPKSQQQK_	0.033869	1.38305	1.35193	20.0994	19.9273	20.6315	18.1335	19.3177	19.1513
P37840	Homo sapiens (Human)	Alpha-synuclein (Non-A beta component of AD amyloid) (Non-A4 component of amyloid precursor) (NACP)	SNCA NACP PARK1	NA	0	1	Biotin (K)	0	1	1	32;34	NA	QGVAEAAGKTK	_QGVAEAAGK(bi)TK_;_QGVAEAAGK(bi)TK_;_QGVAEAAGKTK(bi)_;_QGVAEAAGK(bi)TK_;_QGVAEAAGK(bi)TK_;_QGVAEAAGK(bi)TK_;_QGVAEAAGK(bi)TK_;_QGVAEAAGK(bi)TK_;_QGVAEAAGK(bi)TK_;_QGVAEAAGK(bi)TK_;_QGVAEAAGK(bi)TK_;_QGVAEAAGK(bi)TK_;_QGVAEAAGK(bi)TK_;_QGVAEAAGKTK(bi)_;_QGVAEAAGK(bi)TK_;_QGVAEAAGKTK(bi)_;_QGVAEAAGK(bi)TK_;_QGVAEAAGK(bi)TK_;_QGVAEAAGK(bi)TK_;_QGVAEAAGK(bi)TK_;_QGVAEAAGK(bi)TK_;_QGVAEAAGK(bi)TK_;_QG…	0.00986483	1.85129	1.34656	28.6734	28.6794	28.2537	27.0812	27.6744	26.8111
PF3D7_0532300	Plasmodium falciparum 3D7	Plasmodium exported protein (PHISTb), unknown function	N/A	Previous IDs: MAL5P1.314;PFE1600w	1	0	Biotin (K)	0	1	1	106	NA	SKCCDSISESNMVDR	_SK(bi)CCDSISESNM(ox)VDR_;_SK(bi)CCDSISESNM(ox)VDR_;_SK(bi)CCDSISESNM(ox)VDR_;_SK(bi)CCDSISESNM(ox)VDR_;_SK(bi)CCDSISESNM(ox)VDR_;_SK(bi)CCDSISESNM(ox)VDR_;_SK(bi)CCDSISESNM(ox)VDR_;_SK(bi)CCDSISESNM(ox)VDR_;_SK(bi)CCDSISESNM(ox)VDR_;_SK(bi)CCDSISESNM(ox)VDR_;_SK(bi)CCDSISESNM(ox)VDR_;_SK(bi)CCDSISESNM(ox)VDR_;_SK(bi)CCDSISESNM(ox)VDR_;_SK(bi)CCDSISESNM(ox)VDR_;_SK(bi)CCDSISESNM(ox)VDR_;_SK(bi)CC…	0.000213816	3.09579	1.34587	24.658	24.3642	24.336	23.1361	23.0668	23.1177
P11277	Homo sapiens (Human)	Spectrin beta chain, erythrocytic (Beta-I spectrin)	SPTB SPTB1	NA	0	1	Biotin (K)	0	1	1	707	NA	KQFGHPQIEAR	_K(bi)QFGHPQIEAR_;_K(bi)QFGHPQIEAR_;_K(bi)QFGHPQIEAR_;_K(bi)QFGHPQIEAR_;_K(bi)QFGHPQIEAR_;_K(bi)QFGHPQIEAR_;_K(bi)QFGHPQIEAR_;_K(bi)QFGHPQIEAR_;_K(bi)QFGHPQIEAR_;_K(bi)QFGHPQIEAR_;_K(bi)QFGHPQIEAR_;_K(bi)QFGHPQIEAR_;_K(bi)QFGHPQIEAR_;_K(bi)QFGHPQIEAR_;_K(bi)QFGHPQIEAR_;_K(bi)QFGHPQIEAR_;_K(bi)QFGHPQIEAR_	0.0224249	1.54423	1.34309	22.905	22.6773	22.4391	21.7072	21.6456	20.6393
Q99808	Homo sapiens (Human)	Equilibrative nucleoside transporter 1 (Equilibrative nitrobenzylmercaptopurine riboside-sensitive nucleoside transporter) (Equilibrative NBMPR-sensitive nucleoside transporter) (Nucleoside transporter, es-type) (Solute carrier family 29 member 1)	SLC29A1 ENT1	NA	0	1	Biotin (K)	0	1	1	255	NA	LDLISKGEEPR	_LDLISK(bi)GEEPR_;_LDLISK(bi)GEEPR_;_LDLISK(bi)GEEPR_;_LDLISK(bi)GEEPR_;_LDLISK(bi)GEEPR_;_LDLISK(bi)GEEPR_;_LDLISK(bi)GEEPR_;_LDLISK(bi)GEEPR_;_LDLISK(bi)GEEPR_;_LDLISK(bi)GEEPR_;_LDLISK(bi)GEEPR_;_LDLISK(bi)GEEPR_;_LDLISK(bi)GEEPR_;_LDLISK(bi)GEEPR_;_LDLISK(bi)GEEPR_;_LDLISK(bi)GEEPR_	0.0217085	1.55722	1.34282	22.8919	23.8284	24.0489	22.3741	22.3089	22.0577
PF3D7_1253400	Plasmodium falciparum 3D7	acyl-CoA synthetase	ACS3	Previous IDs: 2277.t00512;MAL12P1.509;PFL2570w	1	0	Biotin (K)	0	1	2	453;455	NA	IKDKVNPNLEIILSGGGK	_IK(bi)DKVNPNLEIILSGGGK_;_IK(bi)DKVNPNLEIILSGGGK_;_IKDK(bi)VNPNLEIILSGGGK_;_IK(bi)DKVNPNLEIILSGGGK_;_IK(bi)DKVNPNLEIILSGGGK_;_IK(bi)DKVNPNLEIILSGGGK_;_IK(bi)DKVNPNLEIILSGGGK_;_IK(bi)DKVNPNLEIILSGGGK_;_IK(bi)DKVNPNLEIILSGGGK_;_IK(bi)DKVNPNLEIILSGGGK_;_IK(bi)DKVNPNLEIILSGGGK_	0.00658078	1.99895	1.3365	21.851	22.0733	21.2723	20.2275	20.3957	20.5639
PF3D7_1372400	Plasmodium falciparum 3D7	acyl-CoA synthetase	ACS4	Previous IDs: MAL13P1.485	1	0	Biotin (K)	0	1	2	453;455	NA	IKDKVNPNLEIILSGGGK	_IK(bi)DKVNPNLEIILSGGGK_;_IK(bi)DKVNPNLEIILSGGGK_;_IKDK(bi)VNPNLEIILSGGGK_;_IK(bi)DKVNPNLEIILSGGGK_;_IK(bi)DKVNPNLEIILSGGGK_;_IK(bi)DKVNPNLEIILSGGGK_;_IK(bi)DKVNPNLEIILSGGGK_;_IK(bi)DKVNPNLEIILSGGGK_;_IK(bi)DKVNPNLEIILSGGGK_;_IK(bi)DKVNPNLEIILSGGGK_;_IK(bi)DKVNPNLEIILSGGGK_	0.00658078	1.99895	1.3365	21.851	22.0733	21.2723	20.2275	20.3957	20.5639
PF3D7_0532400	Plasmodium falciparum 3D7	lysine-rich membrane-associated PHISTb protein	LyMP	Previous IDs: MAL5P1.315;PFE1605w	1	0	Biotin (K)	0	1	1	363	NA	VGYGDNADEDVDKHIEYLVER	_VGYGDNADEDVDK(bi)HIEYLVER_;_VGYGDNADEDVDK(bi)HIEYLVER_;_VGYGDNADEDVDK(bi)HIEYLVER_;_VGYGDNADEDVDK(bi)HIEYLVER_;_VGYGDNADEDVDK(bi)HIEYLVER_;_VGYGDNADEDVDK(bi)HIEYLVER_;_VGYGDNADEDVDK(bi)HIEYLVER_;_VGYGDNADEDVDK(bi)HIEYLVER_;_VGYGDNADEDVDK(bi)HIEYLVER_;_VGYGDNADEDVDK(bi)HIEYLVER_;_VGYGDNADEDVDK(bi)HIEYLVER_;_VGYGDNADEDVDK(bi)HIEYLVER_;_VGYGDNADEDVDK(bi)HIEYLVER_;_VGYGDNADEDVDK(bi)HIEYLVER_;_VGYGDN…	0.00281528	2.30809	1.3346	29.9309	30.443	29.9646	29.0132	28.6963	28.6252
PF3D7_1039000	Plasmodium falciparum 3D7	serine/threonine protein kinase, FIKK family	FIKK10.2	Previous IDs: PF10_0380	1	0	Biotin (K)	0	1	2	514	NA	IPTLGFCKEDDRVQEMFK	_IPTLGFCK(bi)EDDRVQEMFK_;_IPTLGFCK(bi)EDDRVQEMFK_;_IPTLGFCK(bi)EDDRVQEMFK_;_IPTLGFCK(bi)EDDRVQEMFK_;_IPTLGFCK(bi)EDDRVQEMFK_;_IPTLGFCK(bi)EDDRVQEMFK_;_IPTLGFCK(bi)EDDRVQEMFK_;_IPTLGFCK(bi)EDDRVQEMFK_;_IPTLGFCK(bi)EDDRVQEMFK_;_IPTLGFCK(bi)EDDRVQEMFK_;_IPTLGFCK(bi)EDDRVQEM(ox)FK_;_IPTLGFCK(bi)EDDRVQEM(ox)FK_	0.00154111	2.50789	1.33165	21.3319	21.7514	21.2096	20.1958	20.0028	20.0993
PF3D7_0936800	Plasmodium falciparum 3D7	Plasmodium exported protein (PHISTc), unknown function	N/A	Previous IDs: PFI1780w	1	0	Biotin (K)	0	1	3	84;80	NA	KNEEKSLSDEINKCDMK	_KNEEK(bi)SLSDEINKCDMK_;_KNEEK(bi)SLSDEINKCDMK_;_K(bi)NEEKSLSDEINKCDMK_;_KNEEK(bi)SLSDEINKCDMK_;_KNEEK(bi)SLSDEINKCDMK_;_KNEEK(bi)SLSDEINKCDMK_;_KNEEK(bi)SLSDEINKCDMK_;_KNEEK(bi)SLSDEINKCDMK_;_KNEEK(bi)SLSDEINKCDMK_;_KNEEK(bi)SLSDEINKCDMK_;_KNEEK(bi)SLSDEINKCDMK_;_KNEEK(bi)SLSDEINKCDMK_;_KNEEK(bi)SLSDEINKCDMK_;_KNEEK(bi)SLSDEINKCDMK_;_KNEEK(bi)SLSDEINKCDMK_;_KNEEK(bi)SLSDEINKCDMK_;_KNEEK(bi)SLSDE…	0.0174997	1.63569	1.31445	22.9126	22.7179	22.7751	20.9127	21.4874	22.0621
PF3D7_0730900	Plasmodium falciparum 3D7	EMP1-trafficking protein	PTP4	Previous IDs: MAL7P1.171	1	0	Biotin (K);Oxidation (M);Phospho (STY)	1	1	1	2102	2097;2098;2100	GVNVQSSNTNKHMPR	_GVNVQSSNTNK(bi)HM(ox)PR_;_GVNVQSSNTNK(bi)HM(ox)PR_;_GVNVQSSNTNK(bi)HM(ox)PR_;_GVNVQSSNTNK(bi)HM(ox)PR_;_GVNVQSSNTNK(bi)HM(ox)PR_;_GVNVQSSNTNK(bi)HM(ox)PR_;_GVNVQSSNTNK(bi)HM(ox)PR_;_GVNVQSSNTNK(bi)HM(ox)PR_;_GVNVQSSNTNK(bi)HM(ox)PR_;_GVNVQSSNTNK(bi)HM(ox)PR_;_GVNVQSSNTNK(bi)HM(ox)PR_;_GVNVQSSNTNK(bi)HM(ox)PR_;_GVNVQS(ph)SNTNK(bi)HM(ox)PR_;_GVNVQS(ph)SNTNK(bi)HM(ox)PR_;_GVNVQS(ph)SNTNK(bi)HM(ox)P…	0.00800811	1.92824	1.30671	20.152	19.8674	20.3822	18.7904	19.2267	18.4644
PF3D7_0500800	Plasmodium falciparum 3D7	mature parasite-infected erythrocyte surface antigen	MESA	Previous IDs: MAL5P1.9;PFE0040c	1	0	Biotin (K)	0	1	3	304	NA	ETGESKETGESKETGESKETR	_ETGESKETGESKETGESK(bi)ETR_;_ETGESKETGESKETGESK(bi)ETR_;_ETGESKETGESKETGESK(bi)ETR_;_ETGESKETGESKETGESK(bi)ETR_;_ETGESKETGESKETGESK(bi)ETR_;_ETGESKETGESKETGESK(bi)ETR_;_ETGESKETGESKETGESK(bi)ETR_	0.00070688	2.7561	1.30456	20.0031	20.2221	19.8458	18.586	18.8778	18.6935
PF3D7_1436300	Plasmodium falciparum 3D7	translocon component PTEX150	PTEX150	Previous IDs: PF14_0344;Pf112	1	0	Biotin (K)	0	1	1	915	NA	NFGGKPSAHVTDSFSR	_NFGGK(bi)PSAHVTDSFSR_;_NFGGK(bi)PSAHVTDSFSR_;_NFGGK(bi)PSAHVTDSFSR_;_NFGGK(bi)PSAHVTDSFSR_;_NFGGK(bi)PSAHVTDSFSR_;_NFGGK(bi)PSAHVTDSFSR_;_NFGGK(bi)PSAHVTDSFSR_;_NFGGK(bi)PSAHVTDSFSR_;_NFGGK(bi)PSAHVTDSFSR_;_NFGGK(bi)PSAHVTDSFSR_;_NFGGK(bi)PSAHVTDSFSR_;_NFGGK(bi)PSAHVTDSFSR_;_NFGGK(bi)PSAHVTDSFSR_	0.00943009	1.86883	1.29487	22.9174	22.3001	22.489	21.5955	21.3409	20.8855
PF3D7_1477500	Plasmodium falciparum 3D7	Plasmodium exported protein (PHISTb), unknown function	N/A	Previous IDs: PF14_0746	1	0	Biotin (K)	0	1	1	343	NA	ANEFYEKNPDLVTCK	_ANEFYEK(bi)NPDLVTCK_;_ANEFYEK(bi)NPDLVTCK_;_ANEFYEK(bi)NPDLVTCK_;_ANEFYEK(bi)NPDLVTCK_;_ANEFYEK(bi)NPDLVTCK_;_ANEFYEK(bi)NPDLVTCK_;_ANEFYEK(bi)NPDLVTCK_;_ANEFYEK(bi)NPDLVTCK_;_ANEFYEK(bi)NPDLVTCK_;_ANEFYEK(bi)NPDLVTCK_;_ANEFYEK(bi)NPDLVTCK_	0.0352506	1.36805	1.28197	22.9888	21.7194	22.037	20.9665	21.2262	20.7067
PF3D7_0936300	Plasmodium falciparum 3D7	ring-exported protein 3	REX3	Previous IDs: PFI1755c	1	0	Biotin (K)	0	1	1	129	NA	NKIFNFPIPSAEGTVSK	_NK(bi)IFNFPIPSAEGTVSK_;_NK(bi)IFNFPIPSAEGTVSK_;_NK(bi)IFNFPIPSAEGTVSK_;_NK(bi)IFNFPIPSAEGTVSK_;_NK(bi)IFNFPIPSAEGTVSK_;_NK(bi)IFNFPIPSAEGTVSK_;_NK(bi)IFNFPIPSAEGTVSK_;_NK(bi)IFNFPIPSAEGTVSK_;_NK(bi)IFNFPIPSAEGTVSK_;_NK(bi)IFNFPIPSAEGTVSK_;_NK(bi)IFNFPIPSAEGTVSK_;_NK(bi)IFNFPIPSAEGTVSK_;_NK(bi)IFNFPIPSAEGTVSK_;_NK(bi)IFNFPIPSAEGTVSK_;_NK(bi)IFNFPIPSAEGTVSK_;_NK(bi)IFNFPIPSAEGTVSK_;_NK(bi)IFNFPIPS…	0.0670505	1.11254	1.28031	24.9441	24.723	24.3892	24.071	22.4568	23.6877
PF3D7_0202000	Plasmodium falciparum 3D7	knob-associated histidine-rich protein	KAHRP	Previous IDs: PF02_0020;PFB0100c	1	0	Biotin (K)	0	1	3	166;164;161;157	NA	AYEEKYESKHYKLK	_AYEEKYESKHYKLK(bi)_;_AYEEKYESKHYKLK(bi)_;_AYEEKYESKHYKLK(bi)_;_AYEEKYESKHYKLK(bi)_;_AYEEKYESKHYK(bi)LK_;_AYEEKYESKHYK(bi)LK_;_AYEEKYESKHYK(bi)LK_;_AYEEKYESKHYKLK(bi)_;_AYEEKYESKHYK(bi)LK_;_AYEEKYESKHYKLK(bi)_;_AYEEKYESKHYKLK(bi)_;_AYEEKYESKHYKLK(bi)_;_AYEEKYESKHYKLK(bi)_;_AYEEKYESKHYK(bi)LK_;_AYEEKYESKHYKLK(bi)_;_AYEEKYESKHYK(bi)LK_;_AYEEKYESKHYKLK(bi)_;_AYEEKYESKHYKLK(bi)_;_AYEEKYESK(bi)HYK(bi)…	0.0227271	1.53937	1.26652	22.1224	21.6338	22.2898	20.7488	21.2536	20.244
Q9Y570	Homo sapiens (Human)	Protein phosphatase methylesterase 1 (PME-1) (EC 3.1.1.89)	PPME1 PME1 PP2593 PRO0750	NA	0	1	Acetyl (Protein N-term);Biotin (K)	0	1	1	6	NA	SALEKSMHLGR	_(ac)SALEK(bi)SMHLGR_;_(ac)SALEK(bi)SMHLGR_;_(ac)SALEK(bi)SMHLGR_;_(ac)SALEK(bi)SMHLGR_;_(ac)SALEK(bi)SMHLGR_;_(ac)SALEK(bi)SMHLGR_;_(ac)SALEK(bi)SMHLGR_;_(ac)SALEK(bi)SMHLGR_;_(ac)SALEK(bi)SMHLGR_;_(ac)SALEK(bi)SMHLGR_;_(ac)SALEK(bi)SMHLGR_;_(ac)SALEK(bi)SMHLGR_;_(ac)SALEK(bi)SMHLGR_;_(ac)SALEK(bi)SMHLGR_;_(ac)SALEK(bi)SM(ox)HLGR_;_(ac)SALEK(bi)SM(ox)HLGR_;_(ac)SALEK(bi)SM(ox)HLGR_;_(ac)SALEK(bi…	0.00298543	2.2871	1.256	23.2304	23.1409	23.0613	22.0713	21.5108	22.0825
Q00688	Homo sapiens (Human)	Peptidyl-prolyl cis-trans isomerase FKBP3 (PPIase FKBP3) (EC 5.2.1.8) (25 kDa FK506-binding protein) (25 kDa FKBP) (FKBP-25) (FK506-binding protein 3) (FKBP-3) (Immunophilin FKBP25) (Rapamycin-selective 25 kDa immunophilin) (Rotamase)	FKBP3 FKBP25	NA	0	1	Biotin (K)	0	1	1	86	NA	VSEQVKNVK	_VSEQVK(bi)NVK_;_VSEQVK(bi)NVK_;_VSEQVK(bi)NVK_;_VSEQVK(bi)NVK_;_VSEQVK(bi)NVK_;_VSEQVK(bi)NVK_	0.0278862	1.45665	1.25528	20.1516	20.928	20.6425	19.5786	18.7307	19.6469
PF3D7_1201100	Plasmodium falciparum 3D7	RESA-like protein with PHIST and DnaJ domains	N/A	Previous IDs: 2277.t00011;MAL12P1.11;PFL0055c	1	0	Biotin (K)	0	1	2	739	NA	LKEPMSKYDASFR	_LKEPMSK(bi)YDASFR_;_LKEPMSK(bi)YDASFR_;_LKEPMSK(bi)YDASFR_;_LKEPMSK(bi)YDASFR_;_LKEPMSK(bi)YDASFR_;_LKEPMSK(bi)YDASFR_;_LKEPMSK(bi)YDASFR_	0.104222	0.930199	1.24419	21.1213	20.3586	21.1665	20.4994	19.7506	18.6638
PF3D7_0500800	Plasmodium falciparum 3D7	mature parasite-infected erythrocyte surface antigen	MESA	Previous IDs: MAL5P1.9;PFE0040c	1	0	Biotin (K)	0	1	2	304	NA	ETGESKETGESKETR	_ETGESKETGESK(bi)ETR_;_ETGESKETGESK(bi)ETR_;_ETGESKETGESK(bi)ETR_;_ETGESKETGESK(bi)ETR_;_ETGESKETGESK(bi)ETR_;_ETGESKETGESK(bi)ETR_;_ETGESKETGESK(bi)ETR_;_ETGESKETGESK(bi)ETR_;_ETGESKETGESK(bi)ETR_;_ETGESKETGESK(bi)ETR_;_ETGESKETGESK(bi)ETR_	0.0305769	1.42308	1.2434	19.9068	19.8261	19.8443	18.3681	18.1198	19.3592
PF3D7_0500800	Plasmodium falciparum 3D7	mature parasite-infected erythrocyte surface antigen	MESA	Previous IDs: MAL5P1.9;PFE0040c	1	0	Biotin (K)	0	1	2	316	NA	YNKITSEFRETENVK	_YNK(bi)ITSEFRETENVK_;_YNK(bi)ITSEFRETENVK_;_YNK(bi)ITSEFRETENVK_;_YNK(bi)ITSEFRETENVK_;_YNK(bi)ITSEFRETENVK_;_YNK(bi)ITSEFRETENVK_;_YNK(bi)ITSEFRETENVK_;_YNK(bi)ITSEFRETENVK_;_YNK(bi)ITSEFRETENVK_;_YNK(bi)ITSEFRETENVK_;_YNK(bi)ITSEFRETENVK_;_YNK(bi)ITSEFRETENVK_;_YNK(bi)ITSEFRETENVK_;_YNK(bi)ITSEFRETENVK_	0.00109841	2.61347	1.24334	24.922	24.7742	24.6026	23.7283	23.3279	23.5126
Q08495	Homo sapiens (Human)	Dematin (Dematin actin-binding protein) (Erythrocyte membrane protein band 4.9)	DMTN DMT EPB49	NA	0	1	Biotin (K)	0	1	1	6	NA	LQKQPLTSPGSVSPSR	_LQK(bi)QPLTSPGSVSPSR_;_LQK(bi)QPLTSPGSVSPSR_;_LQK(bi)QPLTSPGSVSPSR_;_LQK(bi)QPLTSPGSVSPSR_;_LQK(bi)QPLTSPGSVSPSR_;_LQK(bi)QPLTSPGSVSPSR_;_LQK(bi)QPLTSPGSVSPSR_;_LQK(bi)QPLTSPGSVSPSR_;_LQK(bi)QPLTSPGSVSPSR_;_LQK(bi)QPLTSPGSVSPSR_;_LQK(bi)QPLTSPGSVSPSR_;_LQK(bi)QPLTSPGSVSPSR_;_LQK(bi)QPLTSPGSVSPSR_;_LQK(bi)QPLTSPGSVSPSR_;_LQK(bi)QPLTSPGSVSPSR_;_LQK(bi)QPLTSPGSVSPSR_;_LQK(bi)QPLTSPGSVSPSR_;_LQK(bi)…	0.00127228	2.57044	1.23676	23.3679	22.9435	23.3969	21.9567	21.9541	22.0872
Q08495	Homo sapiens (Human)	Dematin (Dematin actin-binding protein) (Erythrocyte membrane protein band 4.9)	DMTN DMT EPB49	NA	0	1	Biotin (K)	0	1	2	250;254	NA	VTSNLGKMILKEEMEK	_VTSNLGK(bi)M(ox)ILKEEMEK_;_VTSNLGK(bi)MILKEEM(ox)EK_;_VTSNLGK(bi)M(ox)ILKEEMEK_;_VTSNLGK(bi)M(ox)ILKEEMEK_;_VTSNLGK(bi)M(ox)ILKEEMEK_;_VTSNLGK(bi)M(ox)ILKEEMEK_;_VTSNLGK(bi)M(ox)ILKEEMEK_;_VTSNLGK(bi)M(ox)ILKEEMEK_;_VTSNLGK(bi)M(ox)ILKEEMEK_;_VTSNLGK(bi)MILKEEM(ox)EK_;_VTSNLGK(bi)M(ox)ILKEEMEK_;_VTSNLGK(bi)MILKEEM(ox)EK_;_VTSNLGK(bi)M(ox)ILKEEMEK_;_VTSNLGK(bi)MILKEEM(ox)EK_;_VTSNLGK(bi)MILKEEM(o…	0.00166489	2.48304	1.2353	26.6634	26.8138	26.2863	25.3646	25.2643	25.4288
PF3D7_0424900	Plasmodium falciparum 3D7	Plasmodium exported protein (PHISTa), unknown function	N/A	Previous IDs: MAL4P1.232;PFD1185w	1	0	Biotin (K)	0	1	1	124;123	NA	NNGENSNVEKK	_NNGENSNVEKK(bi)_;_NNGENSNVEK(bi)K_;_NNGENSNVEK(bi)K_;_NNGENSNVEK(bi)K_;_NNGENSNVEK(bi)K_;_NNGENSNVEK(bi)K_;_NNGENSNVEK(bi)K_;_NNGENSNVEK(bi)K_;_NNGENSNVEKK(bi)_;_NNGENSNVEKK(bi)_;_NNGENSNVEKK(bi)_;_NNGENSNVEK(bi)K_;_NNGENSNVEK(bi)K_	0.0052736	2.08211	1.23515	19.912	19.6916	20.324	18.7407	18.9583	18.5231
PF3D7_0936800	Plasmodium falciparum 3D7	Plasmodium exported protein (PHISTc), unknown function	N/A	Previous IDs: PFI1780w	1	0	Biotin (K)	0	1	1	302	NA	LQQHKVQPPK	_LQQHK(bi)VQPPK_;_LQQHK(bi)VQPPK_;_LQQHK(bi)VQPPK_;_LQQHK(bi)VQPPK_;_LQQHK(bi)VQPPK_;_LQQHK(bi)VQPPK_;_LQQHK(bi)VQPPK_;_LQQHK(bi)VQPPK_;_LQQHK(bi)VQPPK_;_LQQHK(bi)VQPPK_;_LQQHK(bi)VQPPK_;_LQQHK(bi)VQPPK_;_LQQHK(bi)VQPPK_;_LQQHK(bi)VQPPK_;_LQQHK(bi)VQPPK_;_LQQHK(bi)VQPPK_	0.00731433	1.96232	1.23017	22.5782	22.1422	22.6787	21.1823	21.5724	20.9539
PF3D7_1478600	Plasmodium falciparum 3D7	EMP1-trafficking protein	PTP3	Previous IDs: PF14_0758	1	0	Biotin (K)	0	1	2	479;595	NA	KGTNPFMDEDELEELLRLER	_K(bi)GTNPFMDEDELEELLRLER_;_K(bi)GTNPFMDEDELEELLRLER_;_K(bi)GTNPFMDEDELEELLRLER_;_K(bi)GTNPFMDEDELEELLRLER_;_K(bi)GTNPFMDEDELEELLRLER_;_K(bi)GTNPFMDEDELEELLRLER_;_K(bi)GTNPFMDEDELEELLRLER_;_K(bi)GTNPFMDEDELEELLRLER_;_K(bi)GTNPFMDEDELEELLRLER_;_K(bi)GTNPFM(ox)DEDELEELLRLER_;_K(bi)GTNPFM(ox)DEDELEELLRLER_;_K(bi)GTNPFM(ox)DEDELEELLRLER_;_K(bi)GTNPFM(ox)DEDELEELLRLER_;_K(bi)GTNPFM(ox)DEDELEELLRLER_;_…	0.00892094	1.88892	1.22696	23.631	23.4422	23.5366	22.7462	21.873	22.3096
PF3D7_0402100	Plasmodium falciparum 3D7	Plasmodium exported protein (PHISTb), unknown function	N/A	Previous IDs: MAL4P1.19;PFD0095c	1	0	Biotin (K)	0	1	2	123	NA	QHDENNFSDKSGSMVLNEKDIQLEK	_QHDENNFSDK(bi)SGSMVLNEKDIQLEK_;_QHDENNFSDK(bi)SGSMVLNEKDIQLEK_;_QHDENNFSDK(bi)SGSMVLNEKDIQLEK_;_QHDENNFSDK(bi)SGSMVLNEKDIQLEK_;_QHDENNFSDK(bi)SGSMVLNEKDIQLEK_;_QHDENNFSDK(bi)SGSMVLNEKDIQLEK_;_QHDENNFSDK(bi)SGSMVLNEKDIQLEK_;_QHDENNFSDK(bi)SGSMVLNEKDIQLEK_;_QHDENNFSDK(bi)SGSMVLNEKDIQLEK_;_QHDENNFSDK(bi)SGSMVLNEKDIQLEK_;_QHDENNFSDK(bi)SGSMVLNEKDIQLEK_;_QHDENNFSDK(bi)SGSMVLNEKDIQLEK_;_QHDENNFSDK(bi)…	0.0100699	1.84465	1.22639	23.3998	23.7892	23.0104	22.1734	22.4226	21.9242
P16157	Homo sapiens (Human)	Ankyrin-1 (ANK-1) (Ankyrin-R) (Erythrocyte ankyrin)	ANK1 ANK	NA	0	1	Biotin (K)	0	1	2	1086	NA	SKLVPLVQATFPENAVTKR	_SK(bi)LVPLVQATFPENAVTKR_;_SK(bi)LVPLVQATFPENAVTKR_;_SK(bi)LVPLVQATFPENAVTKR_;_SK(bi)LVPLVQATFPENAVTKR_;_SK(bi)LVPLVQATFPENAVTKR_;_SK(bi)LVPLVQATFPENAVTKR_;_SK(bi)LVPLVQATFPENAVTKR_;_SK(bi)LVPLVQATFPENAVTKR_;_SK(bi)LVPLVQATFPENAVTKR_;_SK(bi)LVPLVQATFPENAVTKR_;_SK(bi)LVPLVQATFPENAVTKR_;_SK(bi)LVPLVQATFPENAVTKR_;_SK(bi)LVPLVQATFPENAVTKR_;_SK(bi)LVPLVQATFPENAVTKR_;_SK(bi)LVPLVQATFPENAVTKR_	0.00662369	1.99711	1.22294	22.5122	23.1439	22.3826	21.4678	21.4894	21.4127
PF3D7_1372300	Plasmodium falciparum 3D7	Plasmodium exported protein (PHIST), unknown function	N/A	N/A	1	0	Biotin (K)	0	1	1	134	NA	HTGNTNQYGKSPPK	_HTGNTNQYGK(bi)SPPK_;_HTGNTNQYGK(bi)SPPK_;_HTGNTNQYGK(bi)SPPK_;_HTGNTNQYGK(bi)SPPK_;_HTGNTNQYGK(bi)SPPK_;_HTGNTNQYGK(bi)SPPK_;_HTGNTNQYGK(bi)SPPK_;_HTGNTNQYGK(bi)SPPK_;_HTGNTNQYGK(bi)SPPK_;_HTGNTNQYGK(bi)SPPK_	0.000481393	2.86644	1.2197	21.294	20.9649	21.1928	19.8178	19.9309	20.044
PF3D7_0532300	Plasmodium falciparum 3D7	Plasmodium exported protein (PHISTb), unknown function	N/A	Previous IDs: MAL5P1.314;PFE1600w	1	0	Biotin (K)	0	1	1	449	NA	LAENQVEKEFQEVNER	_LAENQVEK(bi)EFQEVNER_;_LAENQVEK(bi)EFQEVNER_;_LAENQVEK(bi)EFQEVNER_;_LAENQVEK(bi)EFQEVNER_;_LAENQVEK(bi)EFQEVNER_;_LAENQVEK(bi)EFQEVNER_;_LAENQVEK(bi)EFQEVNER_;_LAENQVEK(bi)EFQEVNER_;_LAENQVEK(bi)EFQEVNER_;_LAENQVEK(bi)EFQEVNER_;_LAENQVEK(bi)EFQEVNER_;_LAENQVEK(bi)EFQEVNER_;_LAENQVEK(bi)EFQEVNER_;_LAENQVEK(bi)EFQEVNER_;_LAENQVEK(bi)EFQEVNER_;_LAENQVEK(bi)EFQEVNER_;_LAENQVEK(bi)EFQEVNER_;_LAENQVE…	0.00113595	2.60222	1.20396	25.7887	25.7991	25.9531	24.643	24.8759	24.4102
PF3D7_0201900	Plasmodium falciparum 3D7	erythrocyte membrane protein 3	EMP3	Previous IDs: PF02_0019;PFB0095c	1	0	Biotin (K)	0	1	2	618;640	NA	EYQLDNEVRDELPEYEKGHVSR	_EYQLDNEVRDELPEYEK(bi)GHVSR_;_EYQLDNEVRDELPEYEK(bi)GHVSR_;_EYQLDNEVRDELPEYEK(bi)GHVSR_;_EYQLDNEVRDELPEYEK(bi)GHVSR_;_EYQLDNEVRDELPEYEK(bi)GHVSR_;_EYQLDNEVRDELPEYEK(bi)GHVSR_;_EYQLDNEVRDELPEYEK(bi)GHVSR_;_EYQLDNEVRDELPEYEK(bi)GHVSR_;_EYQLDNEVRDELPEYEK(bi)GHVSR_;_EYQLDNEVRDELPEYEK(bi)GHVSR_;_EYQLDNEVRDELPEYEK(bi)GHVSR_	0.00702159	1.97618	1.1995	22.5461	22.6863	22.8037	21.5889	21.7996	21.0491
PF3D7_0936800	Plasmodium falciparum 3D7	Plasmodium exported protein (PHISTc), unknown function	N/A	Previous IDs: PFI1780w	1	0	Biotin (K)	0	1	1	365	NA	QVSPKAK	_QVSPK(bi)AK_;_QVSPK(bi)AK_;_QVSPK(bi)AK_;_QVSPK(bi)AK_;_QVSPK(bi)AK_;_QVSPK(bi)AK_	0.0537292	1.1997	1.19549	20.6565	19.9447	20.9818	19.9405	18.8654	19.1907
P21980	Homo sapiens (Human)	Protein-glutamine gamma-glutamyltransferase 2 (EC 2.3.2.13) (Erythrocyte transglutaminase) (Heart G alpha(h)) (hhG alpha(h)) (Isopeptidase TGM2) (EC 3.4.-.-) (Protein G alpha(h)) (G(h)) (Protein-glutamine deamidase TGM2) (EC 3.5.1.44) (Protein-glutamine dopaminyltransferase TGM2) (EC 2.3.1.-) (Protein-glutamine histaminyltransferase TGM2) (EC 2.3.1.-) (Protein-glutamine noradrenalinyltransferase …	TGM2	NA	0	1	Biotin (K);Oxidation (M)	0	1	2	464	NA	ANHLNKLAEKEETGMAMR	_ANHLNK(bi)LAEKEETGM(ox)AMR_;_ANHLNK(bi)LAEKEETGMAM(ox)R_;_ANHLNK(bi)LAEKEETGM(ox)AMR_;_ANHLNK(bi)LAEKEETGMAM(ox)R_;_ANHLNK(bi)LAEKEETGM(ox)AMR_;_ANHLNK(bi)LAEKEETGMAM(ox)R_;_ANHLNK(bi)LAEKEETGM(ox)AMR_;_ANHLNK(bi)LAEKEETGM(ox)AMR_;_ANHLNK(bi)LAEKEETGM(ox)AMR_;_ANHLNK(bi)LAEKEETGMAM(ox)R_;_ANHLNK(bi)LAEKEETGM(ox)AMR_;_ANHLNK(bi)LAEKEETGMAM(ox)R_;_ANHLNK(bi)LAEKEETGM(ox)AMR_;_ANHLNK(bi)LAEKEETGMAM…	0.0642725	1.12905	1.19111	21.9851	22.0332	23.3913	21.2464	21.1407	21.4492
PF3D7_1371900	Plasmodium falciparum 3D7	Plasmodium exported protein, unknown function	N/A	Previous IDs: MAL13P1.465	1	0	Biotin (K)	0	1	1	74	NA	NYKSSVLK	_NYK(bi)SSVLK_;_NYK(bi)SSVLK_;_NYK(bi)SSVLK_;_NYK(bi)SSVLK_;_NYK(bi)SSVLK_;_NYK(bi)SSVLK_;_NYK(bi)SSVLK_;_NYK(bi)SSVLK_;_NYK(bi)SSVLK_;_NYK(bi)SSVLK_	0.00238381	2.36463	1.17016	22.2424	21.8728	22.0576	20.73	20.7793	21.153
PF3D7_1149100	Plasmodium falciparum 3D7	Plasmodium exported protein, unknown function	N/A	Previous IDs: PF11_0508;PF3D7_1149100.1;PF3D7_1149100.2	1	0	Biotin (K)	0	1	1	419	NA	NSTNDSIKTPK	_NSTNDSIK(bi)TPK_;_NSTNDSIK(bi)TPK_;_NSTNDSIK(bi)TPK_;_NSTNDSIK(bi)TPK_;_NSTNDSIK(bi)TPK_;_NSTNDSIK(bi)TPK_	0.0330574	1.3916	1.16931	20.6541	20.1959	20.6841	18.69	19.7577	19.5785
PF3D7_0113000	Plasmodium falciparum 3D7	glutamic acid-rich protein GARP	GARP	Previous IDs: MAL1P3.06;PFA0620c	1	0	Biotin (K);Oxidation (M)	0	1	2	175	NA	EENSEVMSLYKTGQHKPK	_EENSEVMSLYK(bi)TGQHKPK_;_EENSEVMSLYK(bi)TGQHKPK_;_EENSEVMSLYK(bi)TGQHKPK_;_EENSEVMSLYK(bi)TGQHKPK_;_EENSEVMSLYK(bi)TGQHKPK_;_EENSEVMSLYK(bi)TGQHKPK_;_EENSEVMSLYK(bi)TGQHKPK_;_EENSEVMSLYK(bi)TGQHKPK_;_EENSEVMSLYK(bi)TGQHKPK_;_EENSEVMSLYK(bi)TGQHKPK_;_EENSEVMSLYK(bi)TGQHKPK_;_EENSEVMSLYK(bi)TGQHKPK_;_EENSEVMSLYK(bi)TGQHKPK_;_EENSEVMSLYK(bi)TGQHKPK_;_EENSEVMSLYK(bi)TGQHKPK_;_EENSEVMSLYK(bi)TGQHKPK_…	0.0298912	1.43152	1.14224	20.6915	19.7167	20.1913	18.6753	19.3577	19.1399
PF3D7_1253400	Plasmodium falciparum 3D7	acyl-CoA synthetase	ACS3	Previous IDs: 2277.t00512;MAL12P1.509;PFL2570w	1	0	Biotin (K)	0	1	3	745	NA	LKGCAPISVNSENKDEEKK	_LK(bi)GCAPISVNSENKDEEKK_;_LK(bi)GCAPISVNSENKDEEKK_;_LK(bi)GCAPISVNSENKDEEKK_;_LK(bi)GCAPISVNSENKDEEKK_;_LK(bi)GCAPISVNSENKDEEKK_;_LK(bi)GCAPISVNSENKDEEKK_;_LK(bi)GCAPISVNSENKDEEKK_;_LK(bi)GCAPISVNSENKDEEKK_;_LK(bi)GCAPISVNSENKDEEKK_;_LK(bi)GCAPISVNSENKDEEKK_;_LK(bi)GCAPISVNSENKDEEKK_;_LK(bi)GCAPISVNSENKDEEKK_;_LK(bi)GCAPISVNSENKDEEKK_;_LK(bi)GCAPISVNSENKDEEKK_;_LK(bi)GCAPISVNSENKDEEKK_	2.21152e-05	3.65312	1.13823	22.2532	22.302	22.1644	21.0503	21.1531	21.1017
PF3D7_1479000	Plasmodium falciparum 3D7	acyl-CoA synthetase	ACS1a	Previous IDs: PF14_0761	1	0	Biotin (K)	0	1	3	749	NA	LKGCAPISVNSENKDEEKK	_LK(bi)GCAPISVNSENKDEEKK_;_LK(bi)GCAPISVNSENKDEEKK_;_LK(bi)GCAPISVNSENKDEEKK_;_LK(bi)GCAPISVNSENKDEEKK_;_LK(bi)GCAPISVNSENKDEEKK_;_LK(bi)GCAPISVNSENKDEEKK_;_LK(bi)GCAPISVNSENKDEEKK_;_LK(bi)GCAPISVNSENKDEEKK_;_LK(bi)GCAPISVNSENKDEEKK_;_LK(bi)GCAPISVNSENKDEEKK_;_LK(bi)GCAPISVNSENKDEEKK_;_LK(bi)GCAPISVNSENKDEEKK_;_LK(bi)GCAPISVNSENKDEEKK_;_LK(bi)GCAPISVNSENKDEEKK_;_LK(bi)GCAPISVNSENKDEEKK_	2.21152e-05	3.65312	1.13823	22.2532	22.302	22.1644	21.0503	21.1531	21.1017
PF3D7_0801000	Plasmodium falciparum 3D7	Plasmodium exported protein (PHISTc)	N/A	Previous IDs: PF08_0137	1	0	Biotin (K)	0	1	1	492	NA	KNLFEQR	_K(bi)NLFEQR_;_K(bi)NLFEQR_;_K(bi)NLFEQR_;_K(bi)NLFEQR_;_K(bi)NLFEQR_;_K(bi)NLFEQR_;_K(bi)NLFEQR_;_K(bi)NLFEQR_;_K(bi)NLFEQR_;_K(bi)NLFEQR_;_K(bi)NLFEQR_;_K(bi)NLFEQR_	0.000630399	2.79113	1.1375	26.2086	26.2423	26.1041	24.9773	24.9028	25.2623
PF3D7_1477500	Plasmodium falciparum 3D7	Plasmodium exported protein (PHISTb), unknown function	N/A	Previous IDs: PF14_0746	1	0	Biotin (K)	0	1	2	351;343	NA	ANEFYEKNPDLVTCKNAHFLNLLK	_ANEFYEKNPDLVTCK(bi)NAHFLNLLK_;_ANEFYEKNPDLVTCK(bi)NAHFLNLLK_;_ANEFYEKNPDLVTCK(bi)NAHFLNLLK_;_ANEFYEKNPDLVTCK(bi)NAHFLNLLK_;_ANEFYEKNPDLVTCK(bi)NAHFLNLLK_;_ANEFYEKNPDLVTCK(bi)NAHFLNLLK_;_ANEFYEKNPDLVTCK(bi)NAHFLNLLK_;_ANEFYEKNPDLVTCK(bi)NAHFLNLLK_;_ANEFYEKNPDLVTCK(bi)NAHFLNLLK_;_ANEFYEKNPDLVTCK(bi)NAHFLNLLK_;_ANEFYEKNPDLVTCK(bi)NAHFLNLLK_;_ANEFYEKNPDLVTCK(bi)NAHFLNLLK_;_ANEFYEKNPDLVTCK(bi)NAHFLNL…	0.0122947	1.76975	1.12817	24.6527	25.4004	24.7319	23.9773	23.6074	23.8158
Q08495	Homo sapiens (Human)	Dematin (Dematin actin-binding protein) (Erythrocyte membrane protein band 4.9)	DMTN DMT EPB49	NA	0	1	2 Oxidation (M);Biotin (K)	0	1	2	250;254	NA	VTSNLGKMILKEEMEK	_VTSNLGK(bi)M(ox)ILKEEMEK_;_VTSNLGK(bi)MILKEEM(ox)EK_;_VTSNLGK(bi)M(ox)ILKEEMEK_;_VTSNLGK(bi)M(ox)ILKEEMEK_;_VTSNLGK(bi)M(ox)ILKEEMEK_;_VTSNLGK(bi)M(ox)ILKEEMEK_;_VTSNLGK(bi)M(ox)ILKEEMEK_;_VTSNLGK(bi)M(ox)ILKEEMEK_;_VTSNLGK(bi)M(ox)ILKEEMEK_;_VTSNLGK(bi)MILKEEM(ox)EK_;_VTSNLGK(bi)M(ox)ILKEEMEK_;_VTSNLGK(bi)MILKEEM(ox)EK_;_VTSNLGK(bi)M(ox)ILKEEMEK_;_VTSNLGK(bi)MILKEEM(ox)EK_;_VTSNLGK(bi)MILKEEM(o…	0.107763	0.917145	1.12569	21.9027	21.0121	22.7933	20.4643	20.777	21.0898
PF3D7_0402100	Plasmodium falciparum 3D7	Plasmodium exported protein (PHISTb), unknown function	N/A	Previous IDs: MAL4P1.19;PFD0095c	1	0	Biotin (K)	0	1	1	305	NA	GLNPKLNGTHYIDSIR	_GLNPK(bi)LNGTHYIDSIR_;_GLNPK(bi)LNGTHYIDSIR_;_GLNPK(bi)LNGTHYIDSIR_;_GLNPK(bi)LNGTHYIDSIR_;_GLNPK(bi)LNGTHYIDSIR_;_GLNPK(bi)LNGTHYIDSIR_;_GLNPK(bi)LNGTHYIDSIR_;_GLNPK(bi)LNGTHYIDSIR_;_GLNPK(bi)LNGTHYIDSIR_;_GLNPK(bi)LNGTHYIDSIR_;_GLNPK(bi)LNGTHYIDSIR_;_GLNPK(bi)LNGTHYIDSIR_	0.033212	1.39037	1.12447	23.287	22.8574	22.1242	21.4647	21.7935	21.637
PF3D7_1301400	Plasmodium falciparum 3D7	Plasmodium exported protein (hyp12), unknown function	HYP12	Previous IDs: PF13_0073	1	0	Biotin (K)	0	1	1	191	NA	HNANSEYLLDKNLYDLK	_HNANSEYLLDK(bi)NLYDLK_;_HNANSEYLLDK(bi)NLYDLK_;_HNANSEYLLDK(bi)NLYDLK_;_HNANSEYLLDK(bi)NLYDLK_;_HNANSEYLLDK(bi)NLYDLK_;_HNANSEYLLDK(bi)NLYDLK_;_HNANSEYLLDK(bi)NLYDLK_;_HNANSEYLLDK(bi)NLYDLK_;_HNANSEYLLDK(bi)NLYDLK_;_HNANSEYLLDK(bi)NLYDLK_;_HNANSEYLLDK(bi)NLYDLK_;_HNANSEYLLDK(bi)NLYDLK_;_HNANSEYLLDK(bi)NLYDLK_;_HNANSEYLLDK(bi)NLYDLK_;_HNANSEYLLDK(bi)NLYDLK_;_HNANSEYLLDK(bi)NLYDLK_;_HNANSEYLLDK(bi…	0.00308277	2.27596	1.12192	30.1846	30.584	30.2856	29.4692	29.1893	29.0301
P35612	Homo sapiens (Human)	Beta-adducin (Erythrocyte adducin subunit beta)	ADD2 ADDB	NA	0	1	Biotin (K)	0	1	2	511	NA	EQNRQDVKSAGPQSQLLASVIAEK	_EQNRQDVK(bi)SAGPQSQLLASVIAEK_;_EQNRQDVK(bi)SAGPQSQLLASVIAEK_;_EQNRQDVK(bi)SAGPQSQLLASVIAEK_;_EQNRQDVK(bi)SAGPQSQLLASVIAEK_;_EQNRQDVK(bi)SAGPQSQLLASVIAEK_;_EQNRQDVK(bi)SAGPQSQLLASVIAEK_;_EQNRQDVK(bi)SAGPQSQLLASVIAEK_;_EQNRQDVK(bi)SAGPQSQLLASVIAEK_;_EQNRQDVK(bi)SAGPQSQLLASVIAEK_;_EQNRQDVK(bi)SAGPQSQLLASVIAEK_;_EQNRQDVK(bi)SAGPQSQLLASVIAEK_;_EQNRQDVK(bi)SAGPQSQLLASVIAEK_;_EQNRQDVK(bi)SAGPQSQLLASVIA…	0.0195205	1.59986	1.09895	22.8036	23.0609	22.7002	22.2902	21.4135	21.5642
PF3D7_1016300	Plasmodium falciparum 3D7	GBP130 protein	GBP130	Previous IDs: PF10_0159	1	0	Biotin (K)	0	1	3	98	NA	KEKTTLRK	_KEK(bi)TTLRK_;_KEK(bi)TTLRK_;_KEK(bi)TTLRK_;_KEK(bi)TTLRK_;_KEK(bi)TTLRK_	0.0658935	1.11936	1.08977	19.9145	18.9646	19.9467	19.0936	18.3047	18.1582
PF3D7_0730900	Plasmodium falciparum 3D7	EMP1-trafficking protein	PTP4	Previous IDs: MAL7P1.171	1	0	Biotin (K)	0	1	3	1830	NA	NTNNKEKEVKNK	_NTNNKEKEVK(bi)NK_;_NTNNKEKEVK(bi)NK_;_NTNNKEKEVK(bi)NK_;_NTNNKEKEVK(bi)NK_;_NTNNKEKEVK(bi)NK_	0.210322	0.643134	1.08578	18.4625	17.6318	19.1603	16.2062	18.13	17.6611
P62826	Homo sapiens (Human)	GTP-binding nuclear protein Ran (Androgen receptor-associated protein 24) (GTPase Ran) (Ras-like protein TC4) (Ras-related nuclear protein)	RAN ARA24 OK/SW-cl.81	NA	0	1	Biotin (K)	0	1	1	134	NA	AKSIVFHR	_AK(bi)SIVFHR_;_AK(bi)SIVFHR_;_AK(bi)SIVFHR_;_AK(bi)SIVFHR_;_AK(bi)SIVFHR_;_AK(bi)SIVFHR_	0.108028	0.916441	1.08577	20.1156	20.3148	20.0451	18.1748	19.976	19.0674
PF3D7_0500800	Plasmodium falciparum 3D7	mature parasite-infected erythrocyte surface antigen	MESA	Previous IDs: MAL5P1.9;PFE0040c	1	0	Biotin (K)	0	1	3	787	NA	KKVEKGIK	_KKVEK(bi)GIK_;_KKVEK(bi)GIK_;_KKVEK(bi)GIK_;_KKVEK(bi)GIK_;_KKVEK(bi)GIK_;_KKVEK(bi)GIK_	0.0156185	1.67861	1.07624	20.6219	20.0038	20.6157	19.3014	19.0625	19.6488
PF3D7_0532300	Plasmodium falciparum 3D7	Plasmodium exported protein (PHISTb), unknown function	N/A	Previous IDs: MAL5P1.314;PFE1600w	1	0	Biotin (K)	0	1	1	338	NA	FLKNYSTHENTYPTLK	_FLK(bi)NYSTHENTYPTLK_;_FLK(bi)NYSTHENTYPTLK_;_FLK(bi)NYSTHENTYPTLK_;_FLK(bi)NYSTHENTYPTLK_;_FLK(bi)NYSTHENTYPTLK_;_FLK(bi)NYSTHENTYPTLK_;_FLK(bi)NYSTHENTYPTLK_;_FLK(bi)NYSTHENTYPTLK_;_FLK(bi)NYSTHENTYPTLK_;_FLK(bi)NYSTHENTYPTLK_;_FLK(bi)NYSTHENTYPTLK_;_FLK(bi)NYSTHENTYPTLK_;_FLK(bi)NYSTHENTYPTLK_;_FLK(bi)NYSTHENTYPTLK_;_FLK(bi)NYSTHENTYPTLK_;_FLK(bi)NYSTHENTYPTLK_;_FLK(bi)NYSTHENTYPTLK_;_FLK(bi)…	0.00404502	2.17755	1.07463	25.8345	25.3675	25.495	24.3133	24.4517	24.7082
P16157	Homo sapiens (Human)	Ankyrin-1 (ANK-1) (Ankyrin-R) (Erythrocyte ankyrin)	ANK1 ANK	NA	0	1	Biotin (K)	0	1	1	801	NA	VVTDETSFVLVSDKHR	_VVTDETSFVLVSDK(bi)HR_;_VVTDETSFVLVSDK(bi)HR_;_VVTDETSFVLVSDK(bi)HR_;_VVTDETSFVLVSDK(bi)HR_;_VVTDETSFVLVSDK(bi)HR_;_VVTDETSFVLVSDK(bi)HR_;_VVTDETSFVLVSDK(bi)HR_;_VVTDETSFVLVSDK(bi)HR_;_VVTDETSFVLVSDK(bi)HR_;_VVTDETSFVLVSDK(bi)HR_;_VVTDETSFVLVSDK(bi)HR_;_VVTDETSFVLVSDK(bi)HR_;_VVTDETSFVLVSDK(bi)HR_;_VVTDETSFVLVSDK(bi)HR_;_VVTDETSFVLVSDK(bi)HR_;_VVTDETSFVLVSDK(bi)HR_;_VVTDETSFVLVSDK(bi)HR_;_VVTDETS…	0.00162263	2.49262	1.06734	29.0378	28.9284	28.7875	27.6421	27.8493	28.0603
P11277	Homo sapiens (Human)	Spectrin beta chain, erythrocytic (Beta-I spectrin)	SPTB SPTB1	NA	0	1	Biotin (K)	0	1	1	598	NA	FTEGKGYQPCDPQVIQDR	_FTEGK(bi)GYQPCDPQVIQDR_;_FTEGK(bi)GYQPCDPQVIQDR_;_FTEGK(bi)GYQPCDPQVIQDR_;_FTEGK(bi)GYQPCDPQVIQDR_;_FTEGK(bi)GYQPCDPQVIQDR_;_FTEGK(bi)GYQPCDPQVIQDR_;_FTEGK(bi)GYQPCDPQVIQDR_;_FTEGK(bi)GYQPCDPQVIQDR_;_FTEGK(bi)GYQPCDPQVIQDR_;_FTEGK(bi)GYQPCDPQVIQDR_	0.0770882	1.05493	1.06625	22.1178	21.3465	22.7911	20.725	21.0189	21.3128
PF3D7_0731300	Plasmodium falciparum 3D7	Plasmodium exported protein (PHISTb), unknown function	PfG174	Previous IDs: MAL7P1.174	1	0	Biotin (K)	0	1	3	299	NA	SNKSDNINLEKNKK	_SNKSDNINLEK(bi)NKK_;_SNKSDNINLEK(bi)NKK_;_SNKSDNINLEK(bi)NKK_;_SNKSDNINLEK(bi)NKK_;_SNKSDNINLEK(bi)NKK_;_SNKSDNINLEK(bi)NKK_;_SNKSDNINLEK(bi)NKK_	0.0867995	1.00524	1.06012	20.1454	19.2382	20.2036	18.18	19.3915	18.8355
Q08495	Homo sapiens (Human)	Dematin (Dematin actin-binding protein) (Erythrocyte membrane protein band 4.9)	DMTN DMT EPB49	NA	0	1	Biotin (K)	0	1	2	259	NA	MILKEEMEKSLPIR	_MILKEEMEK(bi)SLPIR_;_MILKEEMEK(bi)SLPIR_;_MILKEEMEK(bi)SLPIR_;_MILKEEMEK(bi)SLPIR_;_MILKEEMEK(bi)SLPIR_;_MILKEEMEK(bi)SLPIR_;_MILKEEMEK(bi)SLPIR_;_MILKEEMEK(bi)SLPIR_;_MILKEEMEK(bi)SLPIR_;_MILKEEMEK(bi)SLPIR_;_MILKEEMEK(bi)SLPIR_;_MILKEEMEK(bi)SLPIR_;_MILKEEMEK(bi)SLPIR_;_MILKEEMEK(bi)SLPIR_;_MILKEEMEK(bi)SLPIR_;_MILKEEMEK(bi)SLPIR_;_M(ox)ILKEEMEK(bi)SLPIR_;_M(ox)ILKEEMEK(bi)SLPIR_;_M(ox)ILKEEME…	0.0181416	1.6243	1.05876	23.1992	23.1981	22.4581	21.7339	22.1271	21.818
PF3D7_0532400	Plasmodium falciparum 3D7	lysine-rich membrane-associated PHISTb protein	LyMP	Previous IDs: MAL5P1.315;PFE1605w	1	0	Biotin (K)	0	1	3	468;465	NA	VGSKNTKVGGENKK	_VGSKNTK(bi)VGGENKK_;_VGSKNTK(bi)VGGENKK_;_VGSKNTK(bi)VGGENKK_;_VGSKNTK(bi)VGGENKK_;_VGSKNTK(bi)VGGENKK_;_VGSKNTK(bi)VGGENKK_;_VGSKNTK(bi)VGGENKK_;_VGSKNTK(bi)VGGENKK_;_VGSKNTK(bi)VGGENKK_;_VGSKNTK(bi)VGGENKK_;_VGSKNTK(bi)VGGENKK_;_VGSKNTK(bi)VGGENKK_;_VGSKNTK(bi)VGGENKK_;_VGSK(bi)NTK(bi)VGGENKK_;_VGSK(bi)NTK(bi)VGGENKK_;_VGSK(bi)NTK(bi)VGGENKK_;_VGSK(bi)NTK(bi)VGGENKK_	0.0955741	0.964525	1.05363	20.4587	19.3164	20.6608	19.2814	19.3883	18.6052
O43491	Homo sapiens (Human)	Band 4.1-like protein 2 (Erythrocyte membrane protein band 4.1-like 2) (Generally expressed protein 4.1) (4.1G)	EPB41L2	NA	0	1	Biotin (K)	0	1	1	946	NA	TVKGGISETR	_TVK(bi)GGISETR_;_TVK(bi)GGISETR_;_TVK(bi)GGISETR_;_TVK(bi)GGISETR_;_TVK(bi)GGISETR_;_TVK(bi)GGISETR_;_TVK(bi)GGISETR_;_TVK(bi)GGISETR_;_TVK(bi)GGISETR_;_TVK(bi)GGISETR_;_TVK(bi)GGISETR_;_TVK(bi)GGISETR_;_TVK(bi)GGISETR_;_TVK(bi)GGISETR_;_TVK(bi)GGISETR_;_TVK(bi)GGISETR_;_TVK(bi)GGISETR_;_TVK(bi)GGISETR_;_TVK(bi)GGISETR_;_TVK(bi)GGISETR_;_TVK(bi)GGISETR_;_TVK(bi)GGISETR_;_TVK(bi)GGISETR_;_TVK(bi)…	0.00114283	2.60102	1.05143	25.9529	25.9951	26.0489	24.7019	25.0905	25.0503
P11171	Homo sapiens (Human)	Protein 4.1 (P4.1) (4.1R) (Band 4.1) (EPB4.1) (Erythrocyte membrane protein band 4.1)	EPB41 E41P	NA	0	1	Biotin (K)	0	1	1	808	NA	TVKGGISETR	_TVK(bi)GGISETR_;_TVK(bi)GGISETR_;_TVK(bi)GGISETR_;_TVK(bi)GGISETR_;_TVK(bi)GGISETR_;_TVK(bi)GGISETR_;_TVK(bi)GGISETR_;_TVK(bi)GGISETR_;_TVK(bi)GGISETR_;_TVK(bi)GGISETR_;_TVK(bi)GGISETR_;_TVK(bi)GGISETR_;_TVK(bi)GGISETR_;_TVK(bi)GGISETR_;_TVK(bi)GGISETR_;_TVK(bi)GGISETR_;_TVK(bi)GGISETR_;_TVK(bi)GGISETR_;_TVK(bi)GGISETR_;_TVK(bi)GGISETR_;_TVK(bi)GGISETR_;_TVK(bi)GGISETR_;_TVK(bi)GGISETR_;_TVK(bi)…	0.00114283	2.60102	1.05143	25.9529	25.9951	26.0489	24.7019	25.0905	25.0503
Q9Y2J2	Homo sapiens (Human)	Band 4.1-like protein 3 (4.1B) (Differentially expressed in adenocarcinoma of the lung protein 1) (DAL-1) (Erythrocyte membrane protein band 4.1-like 3) [Cleaved into: Band 4.1-like protein 3, N-terminally processed]	EPB41L3 DAL1 KIAA0987	NA	0	1	Biotin (K)	0	1	1	1027	NA	TVKGGISETR	_TVK(bi)GGISETR_;_TVK(bi)GGISETR_;_TVK(bi)GGISETR_;_TVK(bi)GGISETR_;_TVK(bi)GGISETR_;_TVK(bi)GGISETR_;_TVK(bi)GGISETR_;_TVK(bi)GGISETR_;_TVK(bi)GGISETR_;_TVK(bi)GGISETR_;_TVK(bi)GGISETR_;_TVK(bi)GGISETR_;_TVK(bi)GGISETR_;_TVK(bi)GGISETR_;_TVK(bi)GGISETR_;_TVK(bi)GGISETR_;_TVK(bi)GGISETR_;_TVK(bi)GGISETR_;_TVK(bi)GGISETR_;_TVK(bi)GGISETR_;_TVK(bi)GGISETR_;_TVK(bi)GGISETR_;_TVK(bi)GGISETR_;_TVK(bi)…	0.00114283	2.60102	1.05143	25.9529	25.9951	26.0489	24.7019	25.0905	25.0503
PF3D7_1016300	Plasmodium falciparum 3D7	GBP130 protein	GBP130	Previous IDs: PF10_0159	1	0	Biotin (K)	0	1	1	98	NA	EKTTLR	_EK(bi)TTLR_;_EK(bi)TTLR_;_EK(bi)TTLR_;_EK(bi)TTLR_;_EK(bi)TTLR_	0.0395977	1.32341	1.04802	19.6941	19.7613	20.3576	18.6102	19.4442	18.6146
P11171	Homo sapiens (Human)	Protein 4.1 (P4.1) (4.1R) (Band 4.1) (EPB4.1) (Erythrocyte membrane protein band 4.1)	EPB41 E41P	NA	0	1	Biotin (K)	0	1	1	753	NA	SEIPTKDVPIVHTETK	_SEIPTK(bi)DVPIVHTETK_;_SEIPTK(bi)DVPIVHTETK_;_SEIPTK(bi)DVPIVHTETK_;_SEIPTK(bi)DVPIVHTETK_;_SEIPTK(bi)DVPIVHTETK_;_SEIPTK(bi)DVPIVHTETK_;_SEIPTK(bi)DVPIVHTETK_;_SEIPTK(bi)DVPIVHTETK_;_SEIPTK(bi)DVPIVHTETK_;_SEIPTK(bi)DVPIVHTETK_;_SEIPTK(bi)DVPIVHTETK_;_SEIPTK(bi)DVPIVHTETK_;_SEIPTK(bi)DVPIVHTETK_;_SEIPTK(bi)DVPIVHTETK_;_SEIPTK(bi)DVPIVHTETK_;_SEIPTK(bi)DVPIVHTETK_;_SEIPTK(bi)DVPIVHTETK_;_SEIPTK(…	0.00100664	2.63673	1.04226	27.1846	27.121	27.2232	26.0523	25.984	26.3658
PF3D7_0500800	Plasmodium falciparum 3D7	mature parasite-infected erythrocyte surface antigen	MESA	Previous IDs: MAL5P1.9;PFE0040c	1	0	Biotin (K)	0	1	1	1378	NA	AELDKK	_AELDK(bi)K_;_AELDK(bi)K_;_AELDK(bi)K_;_AELDK(bi)K_;_AELDK(bi)K_;_AELDK(bi)K_;_AELDK(bi)K_;_AELDK(bi)K_;_AELDK(bi)K_;_AELDK(bi)K_;_AELDK(bi)K_	0.445758	0.332051	1.03412	21.8371	18.1919	21.8676	19.5981	19.7654	19.4308
P11171	Homo sapiens (Human)	Protein 4.1 (P4.1) (4.1R) (Band 4.1) (EPB4.1) (Erythrocyte membrane protein band 4.1)	EPB41 E41P	NA	0	1	Biotin (K);Oxidation (M)	0	1	3	690;706	NA	KNFMESVPEPRPSEWDKR	_K(bi)NFM(ox)ESVPEPRPSEWDKR_;_K(bi)NFM(ox)ESVPEPRPSEWDKR_;_K(bi)NFM(ox)ESVPEPRPSEWDKR_;_K(bi)NFM(ox)ESVPEPRPSEWDKR_;_K(bi)NFM(ox)ESVPEPRPSEWDKR_;_K(bi)NFM(ox)ESVPEPRPSEWDKR_;_K(bi)NFM(ox)ESVPEPRPSEWDKR_;_K(bi)NFM(ox)ESVPEPRPSEWDKR_;_K(bi)NFM(ox)ESVPEPRPSEWDKR_;_K(bi)NFM(ox)ESVPEPRPSEWDKR_;_K(bi)NFM(ox)ESVPEPRPSEWDKR_;_K(bi)NFM(ox)ESVPEPRPSEWDKR_;_K(bi)NFM(ox)ESVPEPRPSEWDKR_;_K(bi)NFM(ox)ESVPEPRPS…	0.00598224	2.0364	1.01642	25.9197	25.7767	26.384	24.9052	25.0757	25.0503
PF3D7_0721100	Plasmodium falciparum 3D7	conserved protein, unknown function	N/A	Previous IDs: PF07_0087	1	0	Biotin (K)	0	1	3	88	NA	KNVSNFEEIKKNDENNNR	_K(bi)NVSNFEEIKKNDENNNR_;_K(bi)NVSNFEEIKKNDENNNR_;_K(bi)NVSNFEEIKKNDENNNR_;_K(bi)NVSNFEEIKKNDENNNR_;_K(bi)NVSNFEEIKKNDENNNR_;_K(bi)NVSNFEEIKKNDENNNR_	0.121394	0.869397	1.00293	20.5728	20.7568	20.6284	19.6596	18.7641	20.5255
PF3D7_0731600	Plasmodium falciparum 3D7	acyl-CoA synthetase	ACS5	Previous IDs: PF07_0129	1	0	Biotin (K)	0	1	2	768	NA	NEEQNSKDIHTKNAVQQSK	_NEEQNSKDIHTK(bi)NAVQQSK_;_NEEQNSKDIHTK(bi)NAVQQSK_;_NEEQNSKDIHTK(bi)NAVQQSK_;_NEEQNSKDIHTK(bi)NAVQQSK_;_NEEQNSKDIHTK(bi)NAVQQSK_;_NEEQNSKDIHTK(bi)NAVQQSK_;_NEEQNSKDIHTK(bi)NAVQQSK_;_NEEQNSKDIHTK(bi)NAVQQSK_;_NEEQNSKDIHTK(bi)NAVQQSK_	0.114148	0.893597	0.996214	19.6567	19.5938	20.3599	18.0926	19.5721	18.957
Q08495	Homo sapiens (Human)	Dematin (Dematin actin-binding protein) (Erythrocyte membrane protein band 4.9)	DMTN DMT EPB49	NA	0	1	Biotin (K)	0	1	1	254	NA	MILKEEMEK	_MILK(bi)EEM(ox)EK_;_M(ox)ILK(bi)EEMEK_;_MILK(bi)EEM(ox)EK_;_M(ox)ILK(bi)EEMEK_;_MILK(bi)EEM(ox)EK_;_M(ox)ILK(bi)EEMEK_;_MILK(bi)EEM(ox)EK_;_M(ox)ILK(bi)EEMEK_;_MILK(bi)EEM(ox)EK_;_M(ox)ILK(bi)EEMEK_;_MILK(bi)EEM(ox)EK_;_M(ox)ILK(bi)EEMEK_;_M(ox)ILK(bi)EEMEK_;_M(ox)ILK(bi)EEMEK_;_MILK(bi)EEM(ox)EK_;_M(ox)ILK(bi)EEMEK_;_M(ox)ILK(bi)EEMEK_;_M(ox)ILK(bi)EEMEK_;_M(ox)ILK(bi)EEMEK_;_MILK(bi)EEM(ox)EK_…	0.00118122	2.59301	0.991189	26.65	26.4004	26.7786	25.5297	25.6852	25.6406
PF3D7_0936800	Plasmodium falciparum 3D7	Plasmodium exported protein (PHISTc), unknown function	N/A	Previous IDs: PFI1780w	1	0	Biotin (K)	0	1	1	322;332	NA	SQQQKVQPPK	_SQQQK(bi)VQPPK_;_SQQQK(bi)VQPPK_;_SQQQK(bi)VQPPK_;_SQQQK(bi)VQPPK_;_SQQQK(bi)VQPPK_;_SQQQK(bi)VQPPK_;_SQQQK(bi)VQPPK_;_SQQQK(bi)VQPPK_;_SQQQK(bi)VQPPK_;_SQQQK(bi)VQPPK_;_SQQQK(bi)VQPPK_;_SQQQK(bi)VQPPK_;_SQQQK(bi)VQPPK_;_SQQQK(bi)VQPPK_;_SQQQK(bi)VQPPK_;_SQQQK(bi)VQPPK_;_SQQQK(bi)VQPPK_;_SQQQK(bi)VQPPK_	0.0374525	1.34565	0.988869	21.3638	20.9488	22.0409	20.5599	20.4461	20.3808
PF3D7_1478600	Plasmodium falciparum 3D7	EMP1-trafficking protein	PTP3	Previous IDs: PF14_0758	1	0	Biotin (K)	0	1	1	429;545	NA	LGNNTKQIK	_LGNNTK(bi)QIK_;_LGNNTK(bi)QIK_;_LGNNTK(bi)QIK_;_LGNNTK(bi)QIK_;_LGNNTK(bi)QIK_;_LGNNTK(bi)QIK_;_LGNNTK(bi)QIK_;_LGNNTK(bi)QIK_	0.201318	0.660734	0.984831	20.317	20.0082	19.2436	19.2838	19.5674	17.7631
P16157	Homo sapiens (Human)	Ankyrin-1 (ANK-1) (Ankyrin-R) (Erythrocyte ankyrin)	ANK1 ANK	NA	0	1	Biotin (K)	0	1	1	1873	NA	HSKDHTSTPNP	_HSK(bi)DHTSTPNP_;_HSK(bi)DHTSTPNP_;_HSK(bi)DHTSTPNP_;_HSK(bi)DHTSTPNP_;_HSK(bi)DHTSTPNP_;_HSK(bi)DHTSTPNP_;_HSK(bi)DHTSTPNP_;_HSK(bi)DHTSTPNP_;_HSK(bi)DHTSTPNP_;_HSK(bi)DHTSTPNP_;_HSK(bi)DHTSTPNP_;_HSK(bi)DHTSTPNP_;_HSK(bi)DHTSTPNP_;_HSK(bi)DHTSTPNP_;_HSK(bi)DHTSTPNP_;_HSK(bi)DHTSTPNP_;_HSK(bi)DHTSTPNP_;_HSK(bi)DHTSTPNP_;_HSK(bi)DHTSTPNP_;_HSK(bi)DHTSTPNP_;_HSK(bi)DHTSTPNP_;_HSK(bi)DHTSTPNP_;_HS…	0.0120624	1.77579	0.983756	23.0738	22.8496	23.2587	21.702	22.3373	22.1915
P16157	Homo sapiens (Human)	Ankyrin-1 (ANK-1) (Ankyrin-R) (Erythrocyte ankyrin)	ANK1 ANK	NA	0	1	Biotin (K)	0	1	2	841	NA	DSRDVDEEKELLDFVPK	_DSRDVDEEK(bi)ELLDFVPK_;_DSRDVDEEK(bi)ELLDFVPK_;_DSRDVDEEK(bi)ELLDFVPK_;_DSRDVDEEK(bi)ELLDFVPK_;_DSRDVDEEK(bi)ELLDFVPK_;_DSRDVDEEK(bi)ELLDFVPK_;_DSRDVDEEK(bi)ELLDFVPK_;_DSRDVDEEK(bi)ELLDFVPK_;_DSRDVDEEK(bi)ELLDFVPK_;_DSRDVDEEK(bi)ELLDFVPK_;_DSRDVDEEK(bi)ELLDFVPK_;_DSRDVDEEK(bi)ELLDFVPK_;_DSRDVDEEK(bi)ELLDFVPK_;_DSRDVDEEK(bi)ELLDFVPK_;_DSRDVDEEK(bi)ELLDFVPK_;_DSRDVDEEK(bi)ELLDFVPK_	0.152553	0.774475	0.971773	22.2926	23.6093	22.2186	21.3524	22.3608	21.492
Q08495	Homo sapiens (Human)	Dematin (Dematin actin-binding protein) (Erythrocyte membrane protein band 4.9)	DMTN DMT EPB49	NA	0	1	Biotin (K);Oxidation (M)	0	1	1	254	NA	MILKEEMEK	_MILK(bi)EEM(ox)EK_;_M(ox)ILK(bi)EEMEK_;_MILK(bi)EEM(ox)EK_;_M(ox)ILK(bi)EEMEK_;_MILK(bi)EEM(ox)EK_;_M(ox)ILK(bi)EEMEK_;_MILK(bi)EEM(ox)EK_;_M(ox)ILK(bi)EEMEK_;_MILK(bi)EEM(ox)EK_;_M(ox)ILK(bi)EEMEK_;_MILK(bi)EEM(ox)EK_;_M(ox)ILK(bi)EEMEK_;_M(ox)ILK(bi)EEMEK_;_M(ox)ILK(bi)EEMEK_;_MILK(bi)EEM(ox)EK_;_M(ox)ILK(bi)EEMEK_;_M(ox)ILK(bi)EEMEK_;_M(ox)ILK(bi)EEMEK_;_M(ox)ILK(bi)EEMEK_;_MILK(bi)EEM(ox)EK_…	0.0726505	1.07919	0.970549	24.0212	23.8761	24.7319	23.278	23.7404	22.6992
PF3D7_0202400	Plasmodium falciparum 3D7	translation-enhancing factor	PTEF	Previous IDs: PF02_0024;PFB0115w	1	0	Biotin (K)	0	1	1	360	NA	NIQQLVKDVQLIK	_NIQQLVK(bi)DVQLIK_;_NIQQLVK(bi)DVQLIK_;_NIQQLVK(bi)DVQLIK_;_NIQQLVK(bi)DVQLIK_;_NIQQLVK(bi)DVQLIK_;_NIQQLVK(bi)DVQLIK_;_NIQQLVK(bi)DVQLIK_;_NIQQLVK(bi)DVQLIK_;_NIQQLVK(bi)DVQLIK_;_NIQQLVK(bi)DVQLIK_;_NIQQLVK(bi)DVQLIK_;_NIQQLVK(bi)DVQLIK_;_NIQQLVK(bi)DVQLIK_;_NIQQLVK(bi)DVQLIK_;_NIQQLVK(bi)DVQLIK_;_NIQQLVK(bi)DVQLIK_;_NIQQLVK(bi)DVQLIK_;_NIQQLVK(bi)DVQLIK_;_NIQQLVK(bi)DVQLIK_;_NIQQLVK(bi)DVQLIK_…	0.000790351	2.71715	0.963629	23.7665	23.7991	23.5023	22.6748	22.8204	22.6818
PF3D7_0202000	Plasmodium falciparum 3D7	knob-associated histidine-rich protein	KAHRP	Previous IDs: PF02_0020;PFB0100c	1	0	Biotin (K)	0	1	1	161	NA	YESKHYK	_YESK(bi)HYK_;_YESK(bi)HYK_;_YESK(bi)HYK_;_YESK(bi)HYK_;_YESK(bi)HYK_;_YESK(bi)HYK_;_YESK(bi)HYK_;_YESK(bi)HYK_;_YESK(bi)HYK_;_YESK(bi)HYK_;_YESK(bi)HYK_;_YESK(bi)HYK_;_YESK(bi)HYK_;_YESK(bi)HYK_;_YESK(bi)HYK_;_YESK(bi)HYK_;_YESK(bi)HYK_;_YESK(bi)HYK_;_YESK(bi)HYK_;_YESK(bi)HYK_;_YESK(bi)HYK_;_YESK(bi)HYK_	0.354217	0.425068	0.955866	23.5638	23.3775	23.6934	21.7165	24.4053	21.6452
P21980	Homo sapiens (Human)	Protein-glutamine gamma-glutamyltransferase 2 (EC 2.3.2.13) (Erythrocyte transglutaminase) (Heart G alpha(h)) (hhG alpha(h)) (Isopeptidase TGM2) (EC 3.4.-.-) (Protein G alpha(h)) (G(h)) (Protein-glutamine deamidase TGM2) (EC 3.5.1.44) (Protein-glutamine dopaminyltransferase TGM2) (EC 2.3.1.-) (Protein-glutamine histaminyltransferase TGM2) (EC 2.3.1.-) (Protein-glutamine noradrenalinyltransferase …	TGM2	NA	0	1	Biotin (K)	0	1	2	464	NA	ANHLNKLAEKEETGMAMR	_ANHLNK(bi)LAEKEETGM(ox)AMR_;_ANHLNK(bi)LAEKEETGMAM(ox)R_;_ANHLNK(bi)LAEKEETGM(ox)AMR_;_ANHLNK(bi)LAEKEETGMAM(ox)R_;_ANHLNK(bi)LAEKEETGM(ox)AMR_;_ANHLNK(bi)LAEKEETGMAM(ox)R_;_ANHLNK(bi)LAEKEETGM(ox)AMR_;_ANHLNK(bi)LAEKEETGM(ox)AMR_;_ANHLNK(bi)LAEKEETGM(ox)AMR_;_ANHLNK(bi)LAEKEETGMAM(ox)R_;_ANHLNK(bi)LAEKEETGM(ox)AMR_;_ANHLNK(bi)LAEKEETGMAM(ox)R_;_ANHLNK(bi)LAEKEETGM(ox)AMR_;_ANHLNK(bi)LAEKEETGMAM…	0.18835	0.687892	0.955536	24.2801	23.8854	23.4548	23.5024	21.8102	23.4411
P11277	Homo sapiens (Human)	Spectrin beta chain, erythrocytic (Beta-I spectrin)	SPTB SPTB1	NA	0	1	Biotin (K)	0	1	2	2077;2070	NA	FAALEKPTTLELKER	_FAALEKPTTLELK(bi)ER_;_FAALEK(bi)PTTLELKER_;_FAALEKPTTLELK(bi)ER_;_FAALEK(bi)PTTLELKER_;_FAALEKPTTLELK(bi)ER_;_FAALEKPTTLELK(bi)ER_;_FAALEKPTTLELK(bi)ER_;_FAALEKPTTLELK(bi)ER_;_FAALEKPTTLELK(bi)ER_;_FAALEKPTTLELK(bi)ER_;_FAALEKPTTLELK(bi)ER_;_FAALEKPTTLELK(bi)ER_;_FAALEKPTTLELK(bi)ER_;_FAALEKPTTLELK(bi)ER_;_FAALEK(bi)PTTLELK(bi)ER_;_FAALEK(bi)PTTLELK(bi)ER_	0.125456	0.855823	0.949687	23.796	22.2545	22.4137	21.7958	21.8717	21.9476
P48426	Homo sapiens (Human)	Phosphatidylinositol 5-phosphate 4-kinase type-2 alpha (EC 2.7.1.149) (1-phosphatidylinositol 5-phosphate 4-kinase 2-alpha) (Diphosphoinositide kinase 2-alpha) (PIP5KIII) (Phosphatidylinositol 5-Phosphate 4-Kinase) (PI5P4Kalpha) (Phosphatidylinositol 5-phosphate 4-kinase type II alpha) (PI(5)P 4-kinase type II alpha) (PIP4KII-alpha) (PtdIns(4)P-5-kinase B isoform) (PtdIns(4)P-5-kinase C isoform) …	PIP4K2A PI5P4KA PIP5K2 PIP5K2A	NA	0	1	Biotin (K)	0	1	2	27	NA	KHFVAQKVK	_KHFVAQK(bi)VK_;_KHFVAQK(bi)VK_;_KHFVAQK(bi)VK_;_KHFVAQK(bi)VK_;_KHFVAQK(bi)VK_;_KHFVAQK(bi)VK_	0.0629308	1.13721	0.947989	19.6289	19.7782	19.95	19.4215	18.9082	18.1833
P11171	Homo sapiens (Human)	Protein 4.1 (P4.1) (4.1R) (Band 4.1) (EPB4.1) (Erythrocyte membrane protein band 4.1)	EPB41 E41P	NA	0	1	Biotin (K)	0	1	1	499	NA	SKFLALGSK	_SK(bi)FLALGSK_;_SK(bi)FLALGSK_;_SK(bi)FLALGSK_;_SK(bi)FLALGSK_;_SK(bi)FLALGSK_;_SK(bi)FLALGSK_;_SK(bi)FLALGSK_;_SK(bi)FLALGSK_;_SK(bi)FLALGSK_;_SK(bi)FLALGSK_;_SK(bi)FLALGSK_;_SK(bi)FLALGSK_;_SK(bi)FLALGSK_;_SK(bi)FLALGSK_;_SK(bi)FLALGSK_	0.0082299	1.91875	0.943161	23.0459	22.755	23.3944	22.0214	22.122	22.2225
PF3D7_1477000	Plasmodium falciparum 3D7	Plasmodium exported protein (hyp17), unknown function, pseudogene	N/A	Previous IDs: PF14_0740;pf14_0741	1	0	Biotin (K)	0	1	1		NA	IAKTVLK	_IAK(bi)TVLK_;_IAK(bi)TVLK_;_IAK(bi)TVLK_;_IAK(bi)TVLK_;_IAK(bi)TVLK_;_IAK(bi)TVLK_;_IAK(bi)TVLK_;_IAK(bi)TVLK_;_IAK(bi)TVLK_;_IAK(bi)TVLK_;_IAK(bi)TVLK_;_IAK(bi)TVLK_	0.00551298	2.06586	0.935263	22.7642	22.3266	22.7115	21.4612	21.7607	21.7746
PF3D7_1478600	Plasmodium falciparum 3D7	EMP1-trafficking protein	PTP3	Previous IDs: PF14_0758	1	0	Biotin (K)	0	1	1	1019	NA	IAKTVLK	_IAK(bi)TVLK_;_IAK(bi)TVLK_;_IAK(bi)TVLK_;_IAK(bi)TVLK_;_IAK(bi)TVLK_;_IAK(bi)TVLK_;_IAK(bi)TVLK_;_IAK(bi)TVLK_;_IAK(bi)TVLK_;_IAK(bi)TVLK_;_IAK(bi)TVLK_;_IAK(bi)TVLK_	0.00551298	2.06586	0.935263	22.7642	22.3266	22.7115	21.4612	21.7607	21.7746
P37840	Homo sapiens (Human)	Alpha-synuclein (Non-A beta component of AD amyloid) (Non-A4 component of amyloid precursor) (NACP)	SNCA NACP PARK1	NA	0	1	Biotin (K)	0	1	1	60	NA	TKEQVTNVGGAVVTGVTAVAQK	_TK(bi)EQVTNVGGAVVTGVTAVAQK_;_TK(bi)EQVTNVGGAVVTGVTAVAQK_;_TK(bi)EQVTNVGGAVVTGVTAVAQK_;_TK(bi)EQVTNVGGAVVTGVTAVAQK_;_TK(bi)EQVTNVGGAVVTGVTAVAQK_;_TK(bi)EQVTNVGGAVVTGVTAVAQK_;_TK(bi)EQVTNVGGAVVTGVTAVAQK_;_TK(bi)EQVTNVGGAVVTGVTAVAQK_;_TK(bi)EQVTNVGGAVVTGVTAVAQK_;_TK(bi)EQVTNVGGAVVTGVTAVAQK_;_TK(bi)EQVTNVGGAVVTGVTAVAQK_;_TK(bi)EQVTNVGGAVVTGVTAVAQK_;_TK(bi)EQVTNVGGAVVTGVTAVAQK_;_TK(bi)EQVTNVGGAVVTGVT…	0.0522611	1.21097	0.922287	22.9285	23.2531	22.1527	22.0036	21.708	21.8558
PF3D7_0201900	Plasmodium falciparum 3D7	erythrocyte membrane protein 3	EMP3	Previous IDs: PF02_0019;PFB0095c	1	0	Biotin (K)	0	1	1	1634	NA	NSASKGQQNTGLK	_NSASK(bi)GQQNTGLK_;_NSASK(bi)GQQNTGLK_;_NSASK(bi)GQQNTGLK_;_NSASK(bi)GQQNTGLK_;_NSASK(bi)GQQNTGLK_;_NSASK(bi)GQQNTGLK_	0.0285151	1.44858	0.920002	20.0591	19.7536	20.0636	18.5398	19.2004	19.376
PF3D7_0936800	Plasmodium falciparum 3D7	Plasmodium exported protein (PHISTc), unknown function	N/A	Previous IDs: PFI1780w	1	0	Biotin (K)	0	1	1	312;342	NA	VQQQKVQPPK	_VQQQK(bi)VQPPK_;_VQQQK(bi)VQPPK_;_VQQQK(bi)VQPPK_;_VQQQK(bi)VQPPK_;_VQQQK(bi)VQPPK_;_VQQQK(bi)VQPPK_;_VQQQK(bi)VQPPK_;_VQQQK(bi)VQPPK_;_VQQQK(bi)VQPPK_;_VQQQK(bi)VQPPK_;_VQQQK(bi)VQPPK_;_VQQQK(bi)VQPPK_;_VQQQK(bi)VQPPK_;_VQQQK(bi)VQPPK_;_VQQQK(bi)VQPPK_;_VQQQK(bi)VQPPK_;_VQQQK(bi)VQPPK_;_VQQQK(bi)VQPPK_;_VQQQK(bi)VQPPK_;_VQQQK(bi)VQPPK_;_VQQQK(bi)VQPPK_;_VQQQK(bi)VQPPK_;_VQQQK(bi)VQPPK_;_VQQQK(b…	0.0193283	1.60309	0.911379	21.6482	21.8281	21.9786	20.4751	21.0418	21.2039
P11171	Homo sapiens (Human)	Protein 4.1 (P4.1) (4.1R) (Band 4.1) (EPB4.1) (Erythrocyte membrane protein band 4.1)	EPB41 E41P	NA	0	1	Biotin (K)	0	1	1	506	NA	FLALGSKFR	_FLALGSK(bi)FR_;_FLALGSK(bi)FR_;_FLALGSK(bi)FR_;_FLALGSK(bi)FR_;_FLALGSK(bi)FR_;_FLALGSK(bi)FR_;_FLALGSK(bi)FR_;_FLALGSK(bi)FR_;_FLALGSK(bi)FR_;_FLALGSK(bi)FR_;_FLALGSK(bi)FR_;_FLALGSK(bi)FR_	0.0339964	1.38181	0.910363	22.6821	22.7013	23.0199	21.9449	21.4055	22.3218
P11171	Homo sapiens (Human)	Protein 4.1 (P4.1) (4.1R) (Band 4.1) (EPB4.1) (Erythrocyte membrane protein band 4.1)	EPB41 E41P	NA	0	1	Biotin (K)	0	1	1	852	NA	EQHPDMSVTKVVVHQETEIADE	_EQHPDMSVTK(bi)VVVHQETEIADE_;_EQHPDMSVTK(bi)VVVHQETEIADE_;_EQHPDMSVTK(bi)VVVHQETEIADE_;_EQHPDMSVTK(bi)VVVHQETEIADE_;_EQHPDMSVTK(bi)VVVHQETEIADE_;_EQHPDMSVTK(bi)VVVHQETEIADE_;_EQHPDMSVTK(bi)VVVHQETEIADE_;_EQHPDMSVTK(bi)VVVHQETEIADE_;_EQHPDMSVTK(bi)VVVHQETEIADE_;_EQHPDMSVTK(bi)VVVHQETEIADE_;_EQHPDMSVTK(bi)VVVHQETEIADE_;_EQHPDMSVTK(bi)VVVHQETEIADE_;_EQHPDMSVTK(bi)VVVHQETEIADE_;_EQHPDMSVTK(bi)VVVHQET…	0.000474842	2.86964	0.909987	26.0542	26.3304	26.2919	25.2957	25.3353	25.3155
PF3D7_0801000	Plasmodium falciparum 3D7	Plasmodium exported protein (PHISTc)	N/A	Previous IDs: PF08_0137	1	0	Biotin (K)	0	1	1	156	NA	KGSLGFDSFK	_K(bi)GSLGFDSFK_;_K(bi)GSLGFDSFK_;_K(bi)GSLGFDSFK_;_K(bi)GSLGFDSFK_;_K(bi)GSLGFDSFK_;_K(bi)GSLGFDSFK_;_K(bi)GSLGFDSFK_;_K(bi)GSLGFDSFK_;_K(bi)GSLGFDSFK_;_K(bi)GSLGFDSFK_;_K(bi)GSLGFDSFK_;_K(bi)GSLGFDSFK_;_K(bi)GSLGFDSFK_;_K(bi)GSLGFDSFK_;_K(bi)GSLGFDSFK_;_K(bi)GSLGFDSFK_;_K(bi)GSLGFDSFK_;_K(bi)GSLGFDSFK_;_K(bi)GSLGFDSFK_;_K(bi)GSLGFDSFK_;_K(bi)GSLGFDSFK_;_K(bi)GSLGFDSFK_;_K(bi)GSLGFDSFK_;_K(bi)GS…	0.000644574	2.78313	0.904906	27.6634	27.6994	27.8315	26.6696	26.8961	26.9138
P48426	Homo sapiens (Human)	Phosphatidylinositol 5-phosphate 4-kinase type-2 alpha (EC 2.7.1.149) (1-phosphatidylinositol 5-phosphate 4-kinase 2-alpha) (Diphosphoinositide kinase 2-alpha) (PIP5KIII) (Phosphatidylinositol 5-Phosphate 4-Kinase) (PI5P4Kalpha) (Phosphatidylinositol 5-phosphate 4-kinase type II alpha) (PI(5)P 4-kinase type II alpha) (PIP4KII-alpha) (PtdIns(4)P-5-kinase B isoform) (PtdIns(4)P-5-kinase C isoform) …	PIP4K2A PI5P4KA PIP5K2 PIP5K2A	NA	0	1	Biotin (K)	0	1	3	27	NA	KKHFVAQKVK	_KKHFVAQK(bi)VK_;_KKHFVAQK(bi)VK_;_KKHFVAQK(bi)VK_;_KKHFVAQK(bi)VK_;_KKHFVAQK(bi)VK_;_KKHFVAQK(bi)VK_;_KKHFVAQK(bi)VK_	0.0511093	1.21989	0.902601	19.0052	19.47	19.6493	18.6456	18.8203	17.9509
PF3D7_0201900	Plasmodium falciparum 3D7	erythrocyte membrane protein 3	EMP3	Previous IDs: PF02_0019;PFB0095c	1	0	Biotin (K)	0	1	2	872;894;982;1004;1026;1048	NA	GKEVTNKAR	_GKEVTNK(bi)AR_;_GKEVTNK(bi)AR_;_GKEVTNK(bi)AR_;_GKEVTNK(bi)AR_;_GKEVTNK(bi)AR_;_GKEVTNK(bi)AR_;_GKEVTNK(bi)AR_;_GKEVTNK(bi)AR_;_GKEVTNK(bi)AR_	0.119097	0.876973	0.897884	20.1405	20.0376	20.443	19.057	18.7099	20.1606
PF3D7_1478600	Plasmodium falciparum 3D7	EMP1-trafficking protein	PTP3	Previous IDs: PF14_0758	1	0	Biotin (K)	0	1	3	479;595	NA	KGTNPFMDEDELEELLRLEREEK	_K(bi)GTNPFM(ox)DEDELEELLRLEREEK_;_K(bi)GTNPFM(ox)DEDELEELLRLEREEK_;_K(bi)GTNPFM(ox)DEDELEELLRLEREEK_;_K(bi)GTNPFM(ox)DEDELEELLRLEREEK_;_K(bi)GTNPFM(ox)DEDELEELLRLEREEK_;_K(bi)GTNPFM(ox)DEDELEELLRLEREEK_;_K(bi)GTNPFM(ox)DEDELEELLRLEREEK_;_K(bi)GTNPFM(ox)DEDELEELLRLEREEK_;_K(bi)GTNPFM(ox)DEDELEELLRLEREEK_;_K(bi)GTNPFM(ox)DEDELEELLRLEREEK_;_K(bi)GTNPFM(ox)DEDELEELLRLEREEK_;_K(bi)GTNPFM(ox)DEDELEELL…	0.119496	0.87588	0.895703	24.0378	25.3906	24.1009	23.4011	23.7329	23.7082
PF3D7_0202000	Plasmodium falciparum 3D7	knob-associated histidine-rich protein	KAHRP	Previous IDs: PF02_0020;PFB0100c	1	0	2 Phospho (STY);Biotin (K)	2	1	2	354;351	345;347;343	YSSFSSVNKYGKHGDEK	_YSSFSSVNKYGK(bi)HGDEK_;_YSSFSSVNKYGK(bi)HGDEK_;_YSSFSSVNKYGK(bi)HGDEK_;_YSSFSSVNKYGK(bi)HGDEK_;_YSSFSSVNKYGK(bi)HGDEK_;_YSSFSSVNKYGK(bi)HGDEK_;_YSSFSSVNKYGK(bi)HGDEK_;_YSSFSSVNKYGK(bi)HGDEK_;_YSSFSSVNKYGK(bi)HGDEK_;_YSSFSSVNKYGK(bi)HGDEK_;_YSSFSSVNKYGK(bi)HGDEK_;_YSSFSSVNKYGK(bi)HGDEK_;_YSSFSSVNKYGK(bi)HGDEK_;_YSSFSSVNKYGK(bi)HGDEK_;_YSSFSSVNKYGK(bi)HGDEK_;_YSSFSSVNKYGK(bi)HGDEK_;_YSSFSSVNKYGK(b…	0.0618074	1.14416	0.894482	22.3995	22.0897	21.7897	21.7178	21.1985	20.6792
PF3D7_0532400	Plasmodium falciparum 3D7	lysine-rich membrane-associated PHISTb protein	LyMP	Previous IDs: MAL5P1.315;PFE1605w	1	0	Biotin (K)	0	1	2	146	NA	EHDLWNDHNKVPYTSVYMGVSVQDIDYILDKK	_EHDLWNDHNK(bi)VPYTSVYMGVSVQDIDYILDKK_;_EHDLWNDHNK(bi)VPYTSVYMGVSVQDIDYILDKK_;_EHDLWNDHNK(bi)VPYTSVYMGVSVQDIDYILDKK_;_EHDLWNDHNK(bi)VPYTSVYMGVSVQDIDYILDKK_;_EHDLWNDHNK(bi)VPYTSVYMGVSVQDIDYILDKK_;_EHDLWNDHNK(bi)VPYTSVYMGVSVQDIDYILDKK_;_EHDLWNDHNK(bi)VPYTSVYMGVSVQDIDYILDKK_;_EHDLWNDHNK(bi)VPYTSVYMGVSVQDIDYILDKK_;_EHDLWNDHNK(bi)VPYTSVYMGVSVQDIDYILDKK_;_EHDLWNDHNK(bi)VPYTSVYMGVSVQDIDYILDKK_;_EHDLWNDH…	0.240618	0.586786	0.882643	22.5384	23.9668	23.2526	23.3477	21.9586	21.8037
PF3D7_1016300	Plasmodium falciparum 3D7	GBP130 protein	GBP130	Previous IDs: PF10_0159	1	0	Biotin (K)	0	1	3	163;149	NA	KQINIGDTENQKEGKNVK	_KQINIGDTENQKEGK(bi)NVK_;_KQINIGDTENQKEGK(bi)NVK_;_KQINIGDTENQKEGK(bi)NVK_;_KQINIGDTENQKEGK(bi)NVK_;_KQINIGDTENQKEGK(bi)NVK_;_KQINIGDTENQKEGK(bi)NVK_;_K(bi)QINIGDTENQKEGKNVK_;_KQINIGDTENQKEGK(bi)NVK_;_KQINIGDTENQKEGK(bi)NVK_;_K(bi)QINIGDTENQKEGKNVK_;_KQINIGDTENQKEGK(bi)NVK_;_KQINIGDTENQKEGK(bi)NVK_	0.206843	0.649473	0.876487	20.2562	20.4032	20.5538	19.6323	20.4694	18.4819
PF3D7_0500800	Plasmodium falciparum 3D7	mature parasite-infected erythrocyte surface antigen	MESA	Previous IDs: MAL5P1.9;PFE0040c	1	0	Biotin (K)	0	1	1	190	NA	ELQFIKLR	_ELQFIK(bi)LR_;_ELQFIK(bi)LR_;_ELQFIK(bi)LR_;_ELQFIK(bi)LR_;_ELQFIK(bi)LR_;_ELQFIK(bi)LR_;_ELQFIK(bi)LR_;_ELQFIK(bi)LR_;_ELQFIK(bi)LR_;_ELQFIK(bi)LR_;_ELQFIK(bi)LR_;_ELQFIK(bi)LR_;_ELQFIK(bi)LR_;_ELQFIK(bi)LR_;_ELQFIK(bi)LR_;_ELQFIK(bi)LR_;_ELQFIK(bi)LR_;_ELQFIK(bi)LR_;_ELQFIK(bi)LR_;_ELQFIK(bi)LR_;_ELQFIK(bi)LR_;_ELQFIK(bi)LR_;_ELQFIK(bi)LR_;_ELQFIK(bi)LR_;_ELQFIK(bi)LR_;_ELQFIK(bi)LR_;_ELQFIK(b…	0.756036	0.114937	0.856886	32.0442	26.9424	32.0995	31.2804	25.6577	31.5773
PF3D7_0801000	Plasmodium falciparum 3D7	Plasmodium exported protein (PHISTc)	N/A	Previous IDs: PF08_0137	1	0	Biotin (K)	0	1	1	461	NA	NINNSMKIEK	_NINNSMK(bi)IEK_;_NINNSMK(bi)IEK_;_NINNSMK(bi)IEK_;_NINNSMK(bi)IEK_;_NINNSMK(bi)IEK_;_NINNSMK(bi)IEK_;_NINNSMK(bi)IEK_;_NINNSMK(bi)IEK_;_NINNSMK(bi)IEK_;_NINNSMK(bi)IEK_;_NINNSMK(bi)IEK_;_NINNSMK(bi)IEK_;_NINNSM(ox)K(bi)IEK_;_NINNSM(ox)K(bi)IEK_;_NINNSM(ox)K(bi)IEK_;_NINNSM(ox)K(bi)IEK_;_NINNSM(ox)K(bi)IEK_;_NINNSM(ox)K(bi)IEK_	0.0113638	1.79945	0.855663	24.2376	24.5281	24.1009	23.1421	23.5992	23.5584
PF3D7_1148700	Plasmodium falciparum 3D7	Plasmodium exported protein (PHISTc), unknown function	GEXP12	Previous IDs: PF11_0503	1	0	Biotin (K)	0	1	1	246	NA	INNKTECNPK	_INNK(bi)TECNPK_;_INNK(bi)TECNPK_;_INNK(bi)TECNPK_;_INNK(bi)TECNPK_;_INNK(bi)TECNPK_;_INNK(bi)TECNPK_;_INNK(bi)TECNPK_	0.0251873	1.49923	0.848136	19.5783	19.6204	20.2583	18.9119	19.1726	18.8281
PF3D7_1477000	Plasmodium falciparum 3D7	Plasmodium exported protein (hyp17), unknown function, pseudogene	N/A	Previous IDs: PF14_0740;pf14_0741	1	0	Biotin (K)	0	1	2		NA	VKDLITEGGPQLLDLTANVVGTKTK	_VKDLITEGGPQLLDLTANVVGTK(bi)TK_;_VKDLITEGGPQLLDLTANVVGTKTK(bi)_;_VKDLITEGGPQLLDLTANVVGTK(bi)TK_;_VKDLITEGGPQLLDLTANVVGTKTK(bi)_;_VKDLITEGGPQLLDLTANVVGTK(bi)TK_;_VKDLITEGGPQLLDLTANVVGTKTK(bi)_;_VKDLITEGGPQLLDLTANVVGTKTK(bi)_;_VKDLITEGGPQLLDLTANVVGTK(bi)TK_;_VKDLITEGGPQLLDLTANVVGTKTK(bi)_;_VKDLITEGGPQLLDLTANVVGTKTK(bi)_;_VKDLITEGGPQLLDLTANVVGTKTK(bi)_;_VKDLITEGGPQLLDLTANVVGTKTK(bi)_;_VKDLITEGGPQLLD…	0.0251575	1.49934	0.837586	22.5877	22.6961	22.0099	21.8056	21.5443	21.4311
PF3D7_1478600	Plasmodium falciparum 3D7	EMP1-trafficking protein	PTP3	Previous IDs: PF14_0758	1	0	Biotin (K)	0	1	2	1149;1151	NA	VKDLITEGGPQLLDLTANVVGTKTK	_VKDLITEGGPQLLDLTANVVGTK(bi)TK_;_VKDLITEGGPQLLDLTANVVGTKTK(bi)_;_VKDLITEGGPQLLDLTANVVGTK(bi)TK_;_VKDLITEGGPQLLDLTANVVGTKTK(bi)_;_VKDLITEGGPQLLDLTANVVGTK(bi)TK_;_VKDLITEGGPQLLDLTANVVGTKTK(bi)_;_VKDLITEGGPQLLDLTANVVGTKTK(bi)_;_VKDLITEGGPQLLDLTANVVGTK(bi)TK_;_VKDLITEGGPQLLDLTANVVGTKTK(bi)_;_VKDLITEGGPQLLDLTANVVGTKTK(bi)_;_VKDLITEGGPQLLDLTANVVGTKTK(bi)_;_VKDLITEGGPQLLDLTANVVGTKTK(bi)_;_VKDLITEGGPQLLD…	0.0251575	1.49934	0.837586	22.5877	22.6961	22.0099	21.8056	21.5443	21.4311
PF3D7_0220100	Plasmodium falciparum 3D7	DnaJ protein, putative	N/A	Previous IDs: PF02_0188;PFB0920w	1	0	Biotin (K)	0	1	1	109	NA	NKVFSLPNEK	_NK(bi)VFSLPNEK_;_NK(bi)VFSLPNEK_;_NK(bi)VFSLPNEK_;_NK(bi)VFSLPNEK_;_NK(bi)VFSLPNEK_;_NK(bi)VFSLPNEK_;_NK(bi)VFSLPNEK_;_NK(bi)VFSLPNEK_;_NK(bi)VFSLPNEK_;_NK(bi)VFSLPNEK_;_NK(bi)VFSLPNEK_;_NK(bi)VFSLPNEK_	0.029137	1.44002	0.832676	24.5232	24.3906	24.6383	23.2126	23.8484	23.993
PF3D7_0202000	Plasmodium falciparum 3D7	knob-associated histidine-rich protein	KAHRP	Previous IDs: PF02_0020;PFB0100c	1	0	Biotin (K)	0	1	3	500	NA	KVDSTSADNKSTNAATPGAKDK	_KVDSTSADNK(bi)STNAATPGAKDK_;_KVDSTSADNK(bi)STNAATPGAKDK_;_KVDSTSADNK(bi)STNAATPGAKDK_;_KVDSTSADNK(bi)STNAATPGAKDK_;_KVDSTSADNK(bi)STNAATPGAKDK_;_KVDSTSADNK(bi)STNAATPGAKDK_	0.000999716	2.63804	0.827617	19.9342	20.0779	19.961	19.0803	19.3342	19.0758
P02730	Homo sapiens (Human)	Band 3 anion transport protein (Anion exchange protein 1) (AE 1) (Anion exchanger 1) (Solute carrier family 4 member 1) (CD antigen CD233)	SLC4A1 AE1 DI EPB3	NA	0	1	Biotin (K)	0	1	2	353	NA	RYQSSPAKPDSSFYK	_RYQSSPAK(bi)PDSSFYK_;_RYQSSPAK(bi)PDSSFYK_;_RYQSSPAK(bi)PDSSFYK_;_RYQSSPAK(bi)PDSSFYK_;_RYQSSPAK(bi)PDSSFYK_;_RYQSSPAK(bi)PDSSFYK_;_RYQSSPAK(bi)PDSSFYK_;_RYQSSPAK(bi)PDSSFYK_;_RYQSSPAK(bi)PDSSFYK_;_RYQSSPAK(bi)PDSSFYK_;_RYQSSPAK(bi)PDSSFYK_;_RYQSSPAK(bi)PDSSFYK_;_RYQSSPAK(bi)PDSSFYK_	0.00373052	2.20735	0.824586	23.2731	23.5518	23.1594	22.5954	22.5489	22.3662
PF3D7_1148700	Plasmodium falciparum 3D7	Plasmodium exported protein (PHISTc), unknown function	GEXP12	Previous IDs: PF11_0503	1	0	Biotin (K)	0	1	2	341	NA	ECTPNKNDKNVNR	_ECTPNKNDK(bi)NVNR_;_ECTPNKNDK(bi)NVNR_;_ECTPNKNDK(bi)NVNR_;_ECTPNKNDK(bi)NVNR_;_ECTPNKNDK(bi)NVNR_;_ECTPNKNDK(bi)NVNR_	0.0123267	1.76951	0.82052	19.7562	19.5168	20.0229	18.7924	18.8594	19.1825
PF3D7_0401800	Plasmodium falciparum 3D7	Plasmodium exported protein (PHISTb), unknown function	PfD80	Previous IDs: MAL4P1.16;PFD0080c	1	0	Biotin (K)	0	1	2	347;355	NA	GFGCDCKDAANYILKNLDLYDEHEAK	_GFGCDCK(bi)DAANYILK(bi)NLDLYDEHEAK_;_GFGCDCK(bi)DAANYILK(bi)NLDLYDEHEAK_;_GFGCDCK(bi)DAANYILK(bi)NLDLYDEHEAK_;_GFGCDCK(bi)DAANYILK(bi)NLDLYDEHEAK_;_GFGCDCK(bi)DAANYILK(bi)NLDLYDEHEAK_;_GFGCDCK(bi)DAANYILK(bi)NLDLYDEHEAK_;_GFGCDCK(bi)DAANYILK(bi)NLDLYDEHEAK_;_GFGCDCK(bi)DAANYILK(bi)NLDLYDEHEAK_;_GFGCDCK(bi)DAANYILK(bi)NLDLYDEHEAK_;_GFGCDCK(bi)DAANYILK(bi)NLDLYDEHEAK_;_GFGCDCK(bi)DAANYILK(bi)NLDLY…	0.170943	0.728117	0.810886	24.0128	25.5041	25.4254	24.2564	24.1479	24.1053
P02549	Homo sapiens (Human)	Spectrin alpha chain, erythrocytic 1 (Erythroid alpha-spectrin)	SPTA1 SPTA	NA	0	1	Acetyl (Protein N-term);Biotin (K);Oxidation (M)	0	1	1	6	NA	MEQFPKETVVESSGPK	_(ac)M(ox)EQFPK(bi)ETVVESSGPK_;_(ac)M(ox)EQFPK(bi)ETVVESSGPK_;_(ac)M(ox)EQFPK(bi)ETVVESSGPK_;_(ac)M(ox)EQFPK(bi)ETVVESSGPK_;_(ac)M(ox)EQFPK(bi)ETVVESSGPK_;_(ac)M(ox)EQFPK(bi)ETVVESSGPK_;_(ac)M(ox)EQFPK(bi)ETVVESSGPK_;_(ac)M(ox)EQFPK(bi)ETVVESSGPK_;_(ac)M(ox)EQFPK(bi)ETVVESSGPK_;_(ac)M(ox)EQFPK(bi)ETVVESSGPK_;_(ac)M(ox)EQFPK(bi)ETVVESSGPK_;_(ac)M(ox)EQFPK(bi)ETVVESSGPK_;_(ac)M(ox)EQFPK(bi)ETVVESSG…	0.0981728	0.953975	0.806429	21.9637	22.2455	23.138	21.5837	21.4616	21.8825
PF3D7_0801000	Plasmodium falciparum 3D7	Plasmodium exported protein (PHISTc)	N/A	Previous IDs: PF08_0137	1	0	Biotin (K);Phospho (STY)	1	1	2	165;156;166	158	KGSLGFDSFKK	_KGSLGFDSFK(bi)K_;_KGSLGFDSFK(bi)K_;_KGSLGFDSFK(bi)K_;_KGSLGFDSFK(bi)K_;_K(bi)GSLGFDSFKK_;_KGSLGFDSFK(bi)K_;_K(bi)GSLGFDSFKK_;_K(bi)GSLGFDSFKK_;_KGSLGFDSFK(bi)K_;_KGSLGFDSFK(bi)K_;_KGSLGFDSFK(bi)K_;_KGSLGFDSFK(bi)K_;_KGSLGFDSFK(bi)K_;_KGSLGFDSFK(bi)K_;_KGSLGFDSFK(bi)K_;_K(bi)GS(ph)LGFDSFKK_;_K(bi)GS(ph)LGFDSFKK_;_KGS(ph)LGFDSFK(bi)K_;_K(bi)GS(ph)LGFDSFKK_;_K(bi)GS(ph)LGFDSFKK_;_KGS(ph)LGFDSFK(bi)…	0.000882532	2.68087	0.792326	24.9789	24.9131	24.7885	24.0792	23.9934	24.2308
PF3D7_1252700	Plasmodium falciparum 3D7	Plasmodium exported protein (PHISTb), unknown function	N/A	Previous IDs: 2277.t00505;MAL12P1.502;PFL2535w	1	0	Biotin (K)	0	1	1	437	NA	LKFTAGGGFCGK	_LK(bi)FTAGGGFCGK_;_LK(bi)FTAGGGFCGK_;_LK(bi)FTAGGGFCGK_;_LK(bi)FTAGGGFCGK_;_LK(bi)FTAGGGFCGK_;_LK(bi)FTAGGGFCGK_;_LK(bi)FTAGGGFCGK_	0.059034	1.16147	0.790261	19.5056	19.473	19.9278	18.7402	19.3462	18.4493
PF3D7_1016400	Plasmodium falciparum 3D7	serine/threonine protein kinase, FIKK family	FIKK10.1	Previous IDs: PF10_0160	1	0	Biotin (K)	0	1	1	135	NA	TILSKINVK	_TILSK(bi)INVK_;_TILSK(bi)INVK_;_TILSK(bi)INVK_;_TILSK(bi)INVK_;_TILSK(bi)INVK_;_TILSK(bi)INVK_;_TILSK(bi)INVK_;_TILSK(bi)INVK_;_TILSK(bi)INVK_;_TILSK(bi)INVK_;_TILSK(bi)INVK_;_TILSK(bi)INVK_	0.0200627	1.58939	0.785993	22.0711	21.6268	22.15	20.9155	21.2058	21.3686
P35612	Homo sapiens (Human)	Beta-adducin (Erythrocyte adducin subunit beta)	ADD2 ADDB	NA	0	1	Biotin (K)	0	1	1	612	NA	EAETKSPLVSPSK	_EAETK(bi)SPLVSPSK_;_EAETK(bi)SPLVSPSK_;_EAETK(bi)SPLVSPSK_;_EAETK(bi)SPLVSPSK_;_EAETK(bi)SPLVSPSK_;_EAETK(bi)SPLVSPSK_;_EAETK(bi)SPLVSPSK_;_EAETK(bi)SPLVSPSK_;_EAETK(bi)SPLVSPSK_;_EAETK(bi)SPLVSPSK_;_EAETK(bi)SPLVSPSK_;_EAETK(bi)SPLVSPSK_;_EAETK(bi)SPLVSPSK_	0.0475972	1.2489	0.784756	22.0446	21.9326	22.4633	21.36	20.9715	21.7546
PF3D7_1016400	Plasmodium falciparum 3D7	serine/threonine protein kinase, FIKK family	FIKK10.1	Previous IDs: PF10_0160	1	0	Biotin (K)	0	1	1	608	NA	NLNLHELCAHPWWFSKM	_NLNLHELCAHPWWFSK(bi)M_;_NLNLHELCAHPWWFSK(bi)M_;_NLNLHELCAHPWWFSK(bi)M_;_NLNLHELCAHPWWFSK(bi)M_;_NLNLHELCAHPWWFSK(bi)M_;_NLNLHELCAHPWWFSK(bi)M_;_NLNLHELCAHPWWFSK(bi)M_;_NLNLHELCAHPWWFSK(bi)M_;_NLNLHELCAHPWWFSK(bi)M_	0.0334737	1.38775	0.784409	21.3249	21.2934	20.5773	20.3404	20.2213	20.2808
Q9NTK5	Homo sapiens (Human)	Obg-like ATPase 1 (DNA damage-regulated overexpressed in cancer 45) (DOC45) (GTP-binding protein 9)	OLA1 GTPBP9 PRO2455 PTD004	NA	0	1	Biotin (K)	0	1	2	394;395	NA	FNTPQQPKKK	_FNTPQQPK(bi)KK_;_FNTPQQPK(bi)KK_;_FNTPQQPK(bi)KK_;_FNTPQQPK(bi)KK_;_FNTPQQPKK(bi)K_;_FNTPQQPK(bi)KK_;_FNTPQQPKK(bi)K_;_FNTPQQPK(bi)KK_	0.0368154	1.35154	0.767742	19.5337	19.6909	19.9884	18.597	19.3248	18.9881
P25786	Homo sapiens (Human)	Proteasome subunit alpha type-1 (30 kDa prosomal protein) (PROS-30) (Macropain subunit C2) (Multicatalytic endopeptidase complex subunit C2) (Proteasome component C2) (Proteasome nu chain)	PSMA1 HC2 NU PROS30 PSC2	NA	0	1	Biotin (K)	0	1	1	115	NA	LVSLIGSKTQIPTQR	_LVSLIGSK(bi)TQIPTQR_;_LVSLIGSK(bi)TQIPTQR_;_LVSLIGSK(bi)TQIPTQR_;_LVSLIGSK(bi)TQIPTQR_;_LVSLIGSK(bi)TQIPTQR_;_LVSLIGSK(bi)TQIPTQR_;_LVSLIGSK(bi)TQIPTQR_;_LVSLIGSK(bi)TQIPTQR_;_LVSLIGSK(bi)TQIPTQR_;_LVSLIGSK(bi)TQIPTQR_;_LVSLIGSK(bi)TQIPTQR_;_LVSLIGSK(bi)TQIPTQR_;_LVSLIGSK(bi)TQIPTQR_;_LVSLIGSK(bi)TQIPTQR_;_LVSLIGSK(bi)TQIPTQR_;_LVSLIGSK(bi)TQIPTQR_;_LVSLIGSK(bi)TQIPTQR_;_LVSLIGSK(bi)TQIPTQR_;_LV…	0.0361847	1.35826	0.748039	22.6013	22.9776	22.225	21.661	22.0217	21.8771
PF3D7_0500800	Plasmodium falciparum 3D7	mature parasite-infected erythrocyte surface antigen	MESA	Previous IDs: MAL5P1.9;PFE0040c	1	0	Biotin (K)	0	1	2	549	NA	VIGSEKTQKEIK	_VIGSEK(bi)TQKEIK_;_VIGSEK(bi)TQKEIK_;_VIGSEK(bi)TQKEIK_;_VIGSEK(bi)TQKEIK_;_VIGSEK(bi)TQKEIK_;_VIGSEK(bi)TQKEIK_	0.0647666	1.1261	0.747321	21.1754	20.885	20.906	19.9333	19.9898	20.8013
PF3D7_1148700	Plasmodium falciparum 3D7	Plasmodium exported protein (PHISTc), unknown function	GEXP12	Previous IDs: PF11_0503	1	0	Biotin (K)	0	1	2	287;317;291;321	NA	QCVPKECMKK	_QCVPK(bi)ECMKK_;_QCVPKECMK(bi)K_;_QCVPK(bi)ECMKK_;_QCVPK(bi)ECMKK_;_QCVPK(bi)ECMKK_;_QCVPK(bi)ECMKK_	0.248451	0.57357	0.726664	19.5629	19.2225	19.7528	19.0032	19.5505	17.8045
PF3D7_0532300	Plasmodium falciparum 3D7	Plasmodium exported protein (PHISTb), unknown function	N/A	Previous IDs: MAL5P1.314;PFE1600w	1	0	Biotin (K)	0	1	1	438	NA	EMESKVEK	_EMESK(bi)VEK_;_EMESK(bi)VEK_;_EMESK(bi)VEK_;_EMESK(bi)VEK_;_EMESK(bi)VEK_;_EMESK(bi)VEK_;_EMESK(bi)VEK_;_EMESK(bi)VEK_;_EMESK(bi)VEK_;_EMESK(bi)VEK_;_EMESK(bi)VEK_;_EMESK(bi)VEK_;_EMESK(bi)VEK_;_EMESK(bi)VEK_;_EMESK(bi)VEK_;_EMESK(bi)VEK_;_EMESK(bi)VEK_;_EMESK(bi)VEK_;_EMESK(bi)VEK_;_EMESK(bi)VEK_;_EMESK(bi)VEK_;_EMESK(bi)VEK_;_EMESK(bi)VEK_;_EMESK(bi)VEK_;_EMESK(bi)VEK_;_EMESK(bi)VEK_;_EMESK(bi…	0.0450584	1.27117	0.714763	26.7158	26.6177	26.7401	25.4901	26.2772	26.162
PF3D7_1477500	Plasmodium falciparum 3D7	Plasmodium exported protein (PHISTb), unknown function	N/A	Previous IDs: PF14_0746	1	0	Biotin (K)	0	1	1	313	NA	YLEKPFK	_YLEK(bi)PFK_;_YLEK(bi)PFK_;_YLEK(bi)PFK_;_YLEK(bi)PFK_;_YLEK(bi)PFK_;_YLEK(bi)PFK_;_YLEK(bi)PFK_	0.133199	0.831248	0.711305	20.3438	20.5676	20.2867	19.6141	20.3599	19.0902
PF3D7_0202000	Plasmodium falciparum 3D7	knob-associated histidine-rich protein	KAHRP	Previous IDs: PF02_0020;PFB0100c	1	0	Biotin (K)	0	1	1	396;423	NA	HKDNEDAESVK	_HK(bi)DNEDAESVK_;_HK(bi)DNEDAESVK_;_HK(bi)DNEDAESVK_;_HK(bi)DNEDAESVK_;_HK(bi)DNEDAESVK_;_HK(bi)DNEDAESVK_;_HK(bi)DNEDAESVK_;_HK(bi)DNEDAESVK_;_HK(bi)DNEDAESVK_;_HK(bi)DNEDAESVK_;_HK(bi)DNEDAESVK_	0.3612	0.416933	0.708742	19.5928	18.6601	20.2636	19.3946	19.2077	17.7881
PF3D7_0500800	Plasmodium falciparum 3D7	mature parasite-infected erythrocyte surface antigen	MESA	Previous IDs: MAL5P1.9;PFE0040c	1	0	Biotin (K)	0	1	3	154	NA	RKQQEEENAKDIEEIR	_RKQQEEENAK(bi)DIEEIR_;_RKQQEEENAK(bi)DIEEIR_;_RKQQEEENAK(bi)DIEEIR_;_RKQQEEENAK(bi)DIEEIR_;_RKQQEEENAK(bi)DIEEIR_	0.151572	0.776918	0.703614	20.6355	20.8532	20.3479	20.5674	19.8703	19.2881
PF3D7_0801000	Plasmodium falciparum 3D7	Plasmodium exported protein (PHISTc)	N/A	Previous IDs: PF08_0137	1	0	Biotin (K)	0	1	2	166	NA	KLELGTLNQFDKDK	_K(bi)LELGTLNQFDKDK_;_K(bi)LELGTLNQFDKDK_;_K(bi)LELGTLNQFDKDK_;_K(bi)LELGTLNQFDKDK_;_K(bi)LELGTLNQFDKDK_;_K(bi)LELGTLNQFDKDK_;_K(bi)LELGTLNQFDKDK_;_K(bi)LELGTLNQFDKDK_;_K(bi)LELGTLNQFDKDK_;_K(bi)LELGTLNQFDKDK_;_K(bi)LELGTLNQFDKDK_;_K(bi)LELGTLNQFDKDK_;_K(bi)LELGTLNQFDKDK_;_K(bi)LELGTLNQFDKDK_;_K(bi)LELGTLNQFDKDK_;_K(bi)LELGTLNQFDKDK_;_K(bi)LELGTLNQFDKDK_;_K(bi)LELGTLNQFDKDK_	0.0149588	1.6943	0.696569	23.8849	24.125	23.6449	23.3063	23.2669	22.9919
PF3D7_1107300	Plasmodium falciparum 3D7	polyadenylate-binding protein-interacting protein 1, putative	PAIP1	Previous IDs: PF11_0086	1	0	Biotin (K)	0	1	1	1639	NA	QINEKIINIK	_QINEK(bi)IINIK_;_QINEK(bi)IINIK_;_QINEK(bi)IINIK_;_QINEK(bi)IINIK_;_QINEK(bi)IINIK_;_QINEK(bi)IINIK_;_QINEK(bi)IINIK_;_QINEK(bi)IINIK_;_QINEK(bi)IINIK_;_QINEK(bi)IINIK_;_QINEK(bi)IINIK_	0.374301	0.402145	0.683329	22.454	21.4062	22.1177	21.6324	20.1284	22.167
PF3D7_0730900	Plasmodium falciparum 3D7	EMP1-trafficking protein	PTP4	Previous IDs: MAL7P1.171	1	0	Biotin (K)	0	1	1	1753	NA	EKNNTQNETHK	_EK(bi)NNTQNETHK_;_EK(bi)NNTQNETHK_;_EK(bi)NNTQNETHK_;_EK(bi)NNTQNETHK_;_EK(bi)NNTQNETHK_	0.208159	0.647273	0.678963	18.7689	19.0693	19.576	17.7309	19.0492	18.5972
PF3D7_0500800	Plasmodium falciparum 3D7	mature parasite-infected erythrocyte surface antigen	MESA	Previous IDs: MAL5P1.9;PFE0040c	1	0	Biotin (K)	0	1	1	1140	NA	VNKEVNK	_VNK(bi)EVNK_;_VNK(bi)EVNK_;_VNK(bi)EVNK_;_VNK(bi)EVNK_;_VNK(bi)EVNK_;_VNK(bi)EVNK_	0.0380011	1.33973	0.673305	19.4687	19.3271	19.7845	19.1378	18.8864	18.5362
Q5QJ74	Homo sapiens (Human)	Tubulin-specific chaperone cofactor E-like protein (EL) (Leucine-rich repeat-containing protein 35)	TBCEL LRRC35	NA	0	1	Biotin (K)	0	1	2	329	NA	YGKLEPLAEVDLRPQSSAK	_YGK(bi)LEPLAEVDLRPQSSAK_;_YGK(bi)LEPLAEVDLRPQSSAK_;_YGK(bi)LEPLAEVDLRPQSSAK_;_YGK(bi)LEPLAEVDLRPQSSAK_;_YGK(bi)LEPLAEVDLRPQSSAK_;_YGK(bi)LEPLAEVDLRPQSSAK_;_YGK(bi)LEPLAEVDLRPQSSAK_;_YGK(bi)LEPLAEVDLRPQSSAK_	0.10379	0.931275	0.670126	21.6403	20.9554	21.0177	20.1314	20.5343	20.9373
PF3D7_1201000	Plasmodium falciparum 3D7	Plasmodium exported protein (PHISTb), unknown function	N/A	Previous IDs: 2277.t00010;MAL12P1.10;PFL0050c	1	0	Biotin (K)	0	1	1	575	NA	VKVEGSR	_VK(bi)VEGSR_;_VK(bi)VEGSR_;_VK(bi)VEGSR_;_VK(bi)VEGSR_;_VK(bi)VEGSR_;_VK(bi)VEGSR_	0.23315	0.599781	0.661576	19.4414	18.9427	19.7147	19.1389	19.0975	17.8777
PF3D7_1478600	Plasmodium falciparum 3D7	EMP1-trafficking protein	PTP3	Previous IDs: PF14_0758	1	0	Biotin (K)	0	1	1	417;533	NA	VTTNKTNLK	_VTTNK(bi)TNLK_;_VTTNK(bi)TNLK_;_VTTNK(bi)TNLK_;_VTTNK(bi)TNLK_;_VTTNK(bi)TNLK_;_VTTNK(bi)TNLK_;_VTTNK(bi)TNLK_;_VTTNK(bi)TNLK_	0.110777	0.906256	0.661117	20.0518	19.694	19.7902	18.7913	19.7863	18.9749
P23588	Homo sapiens (Human)	Eukaryotic translation initiation factor 4B (eIF-4B)	EIF4B	NA	0	1	Biotin (K)	0	1	1	365	NA	AASIFGGAKPVDTAAR	_AASIFGGAK(bi)PVDTAAR_;_AASIFGGAK(bi)PVDTAAR_;_AASIFGGAK(bi)PVDTAAR_;_AASIFGGAK(bi)PVDTAAR_;_AASIFGGAK(bi)PVDTAAR_;_AASIFGGAK(bi)PVDTAAR_;_AASIFGGAK(bi)PVDTAAR_;_AASIFGGAK(bi)PVDTAAR_;_AASIFGGAK(bi)PVDTAAR_;_AASIFGGAK(bi)PVDTAAR_;_AASIFGGAK(bi)PVDTAAR_;_AASIFGGAK(bi)PVDTAAR_;_AASIFGGAK(bi)PVDTAAR_;_AASIFGGAK(bi)PVDTAAR_;_AASIFGGAK(bi)PVDTAAR_;_AASIFGGAK(bi)PVDTAAR_;_AASIFGGAK(bi)PVDTAAR_;_AASIFGG…	0.00961887	1.86179	0.654506	24.4631	24.1562	24.4203	23.5024	23.8553	23.7183
PF3D7_0532300	Plasmodium falciparum 3D7	Plasmodium exported protein (PHISTb), unknown function	N/A	Previous IDs: MAL5P1.314;PFE1600w	1	0	Biotin (K);Oxidation (M)	0	1	1	106	NA	SKCCDSISESNMVDR	_SK(bi)CCDSISESNM(ox)VDR_;_SK(bi)CCDSISESNM(ox)VDR_;_SK(bi)CCDSISESNM(ox)VDR_;_SK(bi)CCDSISESNM(ox)VDR_;_SK(bi)CCDSISESNM(ox)VDR_;_SK(bi)CCDSISESNM(ox)VDR_;_SK(bi)CCDSISESNM(ox)VDR_;_SK(bi)CCDSISESNM(ox)VDR_;_SK(bi)CCDSISESNM(ox)VDR_;_SK(bi)CCDSISESNM(ox)VDR_;_SK(bi)CCDSISESNM(ox)VDR_;_SK(bi)CCDSISESNM(ox)VDR_;_SK(bi)CCDSISESNM(ox)VDR_;_SK(bi)CCDSISESNM(ox)VDR_;_SK(bi)CCDSISESNM(ox)VDR_;_SK(bi)CC…	0.0446299	1.27493	0.652933	21.3091	21.6478	22.0709	20.9593	21.1223	20.9874
PF3D7_1001000	Plasmodium falciparum 3D7	Plasmodium exported protein (hyp12), unknown function	PfJ13	Previous IDs: PF10_0013	1	0	Biotin (K)	0	1	2	66	NA	SIKNCKCVNK	_SIKNCK(bi)CVNK_;_SIKNCK(bi)CVNK_;_SIKNCK(bi)CVNK_;_SIKNCK(bi)CVNK_;_SIKNCK(bi)CVNK_;_SIKNCK(bi)CVNK_	0.131498	0.836113	0.6383	19.5066	19.0681	19.7336	18.9283	19.1955	18.2696
P48729	Homo sapiens (Human)	Casein kinase I isoform alpha (CKI-alpha) (EC 2.7.11.1) (CK1)	CSNK1A1	NA	0	1	Acetyl (Protein N-term);Biotin (K)	0	1	1	8	NA	ASSSGSKAEFIVGGK	_(ac)ASSSGSK(bi)AEFIVGGK_;_(ac)ASSSGSK(bi)AEFIVGGK_;_(ac)ASSSGSK(bi)AEFIVGGK_;_(ac)ASSSGSK(bi)AEFIVGGK_;_(ac)ASSSGSK(bi)AEFIVGGK_;_(ac)ASSSGSK(bi)AEFIVGGK_;_(ac)ASSSGSK(bi)AEFIVGGK_;_(ac)ASSSGSK(bi)AEFIVGGK_;_(ac)ASSSGSK(bi)AEFIVGGK_;_(ac)ASSSGSK(bi)AEFIVGGK_;_(ac)ASSSGSK(bi)AEFIVGGK_;_(ac)ASSSGSK(bi)AEFIVGGK_;_(ac)ASSSGSK(bi)AEFIVGGK_;_(ac)ASSSGSK(bi)AEFIVGGK_;_(ac)ASSSGSK(bi)AEFIVGGK_;_(ac)ASSS…	0.037251	1.34721	0.632196	22.4514	22.5949	23.062	21.9191	22.2356	22.057
PF3D7_0202000	Plasmodium falciparum 3D7	knob-associated histidine-rich protein	KAHRP	Previous IDs: PF02_0020;PFB0100c	1	0	Biotin (K)	0	1	1	512;510	NA	STNAATPGAKDK	_STNAATPGAKDK(bi)_;_STNAATPGAK(bi)DK_;_STNAATPGAKDK(bi)_;_STNAATPGAKDK(bi)_;_STNAATPGAKDK(bi)_;_STNAATPGAKDK(bi)_	0.380865	0.39528	0.623578	20.137	19.924	19.9359	20.0674	18.1175	19.9413
PF3D7_0424500	Plasmodium falciparum 3D7	serine/threonine protein kinase, FIKK family	FIKK4.1	Previous IDs: MAL4P1.228;PFD1165w	1	0	Biotin (K)	0	1	2	422	NA	KKILHESLK	_KK(bi)ILHESLK_;_KK(bi)ILHESLK_;_KK(bi)ILHESLK_	0.0293124	1.43822	0.618946	19.5477	18.9794	19.2201	18.503	18.7967	18.5905
PF3D7_0532300	Plasmodium falciparum 3D7	Plasmodium exported protein (PHISTb), unknown function	N/A	Previous IDs: MAL5P1.314;PFE1600w	1	0	Biotin (K)	0	1	1	335	NA	NGKFLK	_NGK(bi)FLK_;_NGK(bi)FLK_;_NGK(bi)FLK_;_NGK(bi)FLK_;_NGK(bi)FLK_;_NGK(bi)FLK_;_NGK(bi)FLK_;_NGK(bi)FLK_;_NGK(bi)FLK_;_NGK(bi)FLK_;_NGK(bi)FLK_;_NGK(bi)FLK_	0.019002	1.60881	0.618863	23.6418	23.2097	23.4875	22.8043	22.6631	23.015
P06703	Homo sapiens (Human)	Protein S100-A6 (Calcyclin) (Growth factor-inducible protein 2A9) (MLN 4) (Prolactin receptor-associated protein) (PRA) (S100 calcium-binding protein A6)	S100A6 CACY	NA	0	1	Biotin (K)	0	1	1	47	NA	ELTIGSKLQDAEIAR	_ELTIGSK(bi)LQDAEIAR_;_ELTIGSK(bi)LQDAEIAR_;_ELTIGSK(bi)LQDAEIAR_;_ELTIGSK(bi)LQDAEIAR_;_ELTIGSK(bi)LQDAEIAR_;_ELTIGSK(bi)LQDAEIAR_;_ELTIGSK(bi)LQDAEIAR_;_ELTIGSK(bi)LQDAEIAR_;_ELTIGSK(bi)LQDAEIAR_;_ELTIGSK(bi)LQDAEIAR_;_ELTIGSK(bi)LQDAEIAR_;_ELTIGSK(bi)LQDAEIAR_;_ELTIGSK(bi)LQDAEIAR_;_ELTIGSK(bi)LQDAEIAR_;_ELTIGSK(bi)LQDAEIAR_;_ELTIGSK(bi)LQDAEIAR_	0.226403	0.611836	0.610326	21.3118	21.6097	21.9583	21.5848	21.1801	20.284
PF3D7_1367700	Plasmodium falciparum 3D7	alanine--tRNA ligase	AlaRS	Previous IDs: PF13_0354	1	0	Biotin (K)	0	1	0	1235	NA	HVLQEPNENK	_HVLQEPNENK(bi)_;_HVLQEPNENK(bi)_;_HVLQEPNENK(bi)_;_HVLQEPNENK(bi)_;_HVLQEPNENK(bi)_;_HVLQEPNENK(bi)_;_HVLQEPNENK(bi)_;_HVLQEPNENK(bi)_;_HVLQEPNENK(bi)_;_HVLQEPNENK(bi)_	0.0153195	1.68613	0.595358	21.3758	21.0966	21.2362	20.3963	20.7725	20.7538
PF3D7_1039000	Plasmodium falciparum 3D7	serine/threonine protein kinase, FIKK family	FIKK10.2	Previous IDs: PF10_0380	1	0	Biotin (K)	0	1	1	804	NA	IKNPLEYLK	_IK(bi)NPLEYLK_;_IK(bi)NPLEYLK_;_IK(bi)NPLEYLK_;_IK(bi)NPLEYLK_;_IK(bi)NPLEYLK_;_IK(bi)NPLEYLK_;_IK(bi)NPLEYLK_;_IK(bi)NPLEYLK_;_IK(bi)NPLEYLK_;_IK(bi)NPLEYLK_;_IK(bi)NPLEYLK_;_IK(bi)NPLEYLK_;_IK(bi)NPLEYLK_;_IK(bi)NPLEYLK_;_IK(bi)NPLEYLK_	0.0629675	1.13721	0.591793	24.4753	25.125	24.8806	24.4777	24.0183	24.2095
P11277	Homo sapiens (Human)	Spectrin beta chain, erythrocytic (Beta-I spectrin)	SPTB SPTB1	NA	0	1	Biotin (K)	0	1	1	2056	NA	HEAFEKSTASWAER	_HEAFEK(bi)STASWAER_;_HEAFEK(bi)STASWAER_;_HEAFEK(bi)STASWAER_;_HEAFEK(bi)STASWAER_;_HEAFEK(bi)STASWAER_;_HEAFEK(bi)STASWAER_;_HEAFEK(bi)STASWAER_;_HEAFEK(bi)STASWAER_;_HEAFEK(bi)STASWAER_;_HEAFEK(bi)STASWAER_	0.309011	0.482644	0.587804	23.8534	24.3708	25.5428	23.8772	24.1252	24.0012
P31948	Homo sapiens (Human)	Stress-induced-phosphoprotein 1 (STI1) (Hsc70/Hsp90-organizing protein) (Hop) (Renal carcinoma antigen NY-REN-11) (Transformation-sensitive protein IEF SSP 3521)	STIP1	NA	0	1	Biotin (K)	0	1	2	523;530	NA	LILEQMQKDPQALSEHLKNPVIAQK	_LILEQMQKDPQALSEHLK(bi)NPVIAQK_;_LILEQMQKDPQALSEHLK(bi)NPVIAQK_;_LILEQMQKDPQALSEHLK(bi)NPVIAQK_;_LILEQMQKDPQALSEHLK(bi)NPVIAQK_;_LILEQMQKDPQALSEHLK(bi)NPVIAQK_;_LILEQMQKDPQALSEHLK(bi)NPVIAQK_;_LILEQMQKDPQALSEHLK(bi)NPVIAQK_;_LILEQMQKDPQALSEHLK(bi)NPVIAQK_;_LILEQMQKDPQALSEHLK(bi)NPVIAQK_;_LILEQMQKDPQALSEHLK(bi)NPVIAQK_;_LILEQMQKDPQALSEHLK(bi)NPVIAQK_;_LILEQMQKDPQALSEHLKNPVIAQK(bi)_	0.117946	0.880828	0.586191	22.9188	23.006	22.2397	21.8433	22.1353	22.4273
PF3D7_1016400	Plasmodium falciparum 3D7	serine/threonine protein kinase, FIKK family	FIKK10.1	Previous IDs: PF10_0160	1	0	Biotin (K)	0	1	1	462	NA	HLKNMNGTYLFESCVPTIGK	_HLK(bi)NMNGTYLFESCVPTIGK_;_HLK(bi)NMNGTYLFESCVPTIGK_;_HLK(bi)NMNGTYLFESCVPTIGK_;_HLK(bi)NMNGTYLFESCVPTIGK_;_HLK(bi)NMNGTYLFESCVPTIGK_;_HLK(bi)NMNGTYLFESCVPTIGK_;_HLK(bi)NMNGTYLFESCVPTIGK_;_HLK(bi)NMNGTYLFESCVPTIGK_;_HLK(bi)NMNGTYLFESCVPTIGK_;_HLK(bi)NMNGTYLFESCVPTIGK_;_HLK(bi)NMNGTYLFESCVPTIGK_;_HLK(bi)NMNGTYLFESCVPTIGK_	0.0498057	1.22996	0.563146	23.5753	24.0271	23.3904	23.2434	23.0548	23.0052
PF3D7_0730900	Plasmodium falciparum 3D7	EMP1-trafficking protein	PTP4	Previous IDs: MAL7P1.171	1	0	Biotin (K)	0	1	2	168;161	NA	NVLEKYNDYASKSHGMSSVLK	_NVLEKYNDYASK(bi)SHGMSSVLK_;_NVLEKYNDYASK(bi)SHGMSSVLK_;_NVLEKYNDYASK(bi)SHGMSSVLK_;_NVLEKYNDYASK(bi)SHGMSSVLK_;_NVLEKYNDYASK(bi)SHGMSSVLK_;_NVLEKYNDYASK(bi)SHGMSSVLK_;_NVLEKYNDYASK(bi)SHGMSSVLK_;_NVLEKYNDYASK(bi)SHGMSSVLK_;_NVLEKYNDYASK(bi)SHGMSSVLK_;_NVLEKYNDYASK(bi)SHGMSSVLK_;_NVLEKYNDYASK(bi)SHGMSSVLK_;_NVLEKYNDYASK(bi)SHGMSSVLK_;_NVLEKYNDYASK(bi)SHGMSSVLK_;_NVLEKYNDYASK(bi)SHGMSSVLK_;_NVLEKY…	0.233917	0.598703	0.559473	25.0983	24.1091	24.0086	23.4527	24.0428	24.0422
PF3D7_0532300	Plasmodium falciparum 3D7	Plasmodium exported protein (PHISTb), unknown function	N/A	Previous IDs: MAL5P1.314;PFE1600w	1	0	Biotin (K)	0	1	2	441;449	NA	VEKLAENQVEKEFQEVNER	_VEK(bi)LAENQVEKEFQEVNER_;_VEKLAENQVEK(bi)EFQEVNER_;_VEK(bi)LAENQVEKEFQEVNER_;_VEKLAENQVEK(bi)EFQEVNER_;_VEK(bi)LAENQVEKEFQEVNER_;_VEKLAENQVEK(bi)EFQEVNER_;_VEK(bi)LAENQVEKEFQEVNER_;_VEKLAENQVEK(bi)EFQEVNER_;_VEK(bi)LAENQVEKEFQEVNER_;_VEKLAENQVEK(bi)EFQEVNER_;_VEK(bi)LAENQVEKEFQEVNER_;_VEK(bi)LAENQVEKEFQEVNER_;_VEK(bi)LAENQVEKEFQEVNER_;_VEK(bi)LAENQVEKEFQEVNER_;_VEK(bi)LAENQVEKEFQEVNER_;_VEK(bi)L…	0.156285	0.764335	0.558263	24.6364	25.4485	24.9672	24.8243	24.4789	24.0741
PF3D7_1149400	Plasmodium falciparum 3D7	Plasmodium exported protein, unknown function	N/A	Previous IDs: PF11_0511	1	0	Biotin (K)	0	1	2	162	NA	LSKFIDPYINKEDDEK	_LSK(bi)FIDPYINKEDDEK_;_LSK(bi)FIDPYINKEDDEK_;_LSK(bi)FIDPYINKEDDEK_;_LSK(bi)FIDPYINKEDDEK_;_LSK(bi)FIDPYINKEDDEK_;_LSK(bi)FIDPYINKEDDEK_;_LSK(bi)FIDPYINKEDDEK_;_LSK(bi)FIDPYINKEDDEK_	0.102064	0.937824	0.553268	20.8111	20.5653	20.3195	20.012	19.6311	20.393
PF3D7_1477000	Plasmodium falciparum 3D7	Plasmodium exported protein (hyp17), unknown function, pseudogene	N/A	Previous IDs: PF14_0740;pf14_0741	1	0	Biotin (K)	0	1	1		NA	FKDALLEVTK	_FK(bi)DALLEVTK_;_FK(bi)DALLEVTK_;_FK(bi)DALLEVTK_;_FK(bi)DALLEVTK_;_FK(bi)DALLEVTK_;_FK(bi)DALLEVTK_;_FK(bi)DALLEVTK_;_FK(bi)DALLEVTK_;_FK(bi)DALLEVTK_;_FK(bi)DALLEVTK_	0.00101002	2.63673	0.549781	20.9227	20.9703	20.8751	20.2875	20.3482	20.4832
PF3D7_1478600	Plasmodium falciparum 3D7	EMP1-trafficking protein	PTP3	Previous IDs: PF14_0758	1	0	Biotin (K)	0	1	1	868	NA	FKDALLEVTK	_FK(bi)DALLEVTK_;_FK(bi)DALLEVTK_;_FK(bi)DALLEVTK_;_FK(bi)DALLEVTK_;_FK(bi)DALLEVTK_;_FK(bi)DALLEVTK_;_FK(bi)DALLEVTK_;_FK(bi)DALLEVTK_;_FK(bi)DALLEVTK_;_FK(bi)DALLEVTK_	0.00101002	2.63673	0.549781	20.9227	20.9703	20.8751	20.2875	20.3482	20.4832
PF3D7_0202000	Plasmodium falciparum 3D7	knob-associated histidine-rich protein	KAHRP	Previous IDs: PF02_0020;PFB0100c	1	0	Biotin (K)	0	1	2	512	NA	DKTQGGKTDK	_DK(bi)TQGGKTDK_;_DK(bi)TQGGKTDK_;_DK(bi)TQGGKTDK_;_DK(bi)TQGGKTDK_;_DK(bi)TQGGKTDK_;_DK(bi)TQGGKTDK_	0.397123	0.378832	0.535793	20.5098	19.3102	20.1899	20.2453	19.425	18.7322
PF3D7_0801000	Plasmodium falciparum 3D7	Plasmodium exported protein (PHISTc)	N/A	Previous IDs: PF08_0137	1	0	Biotin (K)	0	1	1	454	NA	GLNEQHVNPWTTTLADLKNINNSMK	_GLNEQHVNPWTTTLADLK(bi)NINNSMK_;_GLNEQHVNPWTTTLADLK(bi)NINNSMK_;_GLNEQHVNPWTTTLADLK(bi)NINNSMK_;_GLNEQHVNPWTTTLADLK(bi)NINNSMK_;_GLNEQHVNPWTTTLADLK(bi)NINNSMK_;_GLNEQHVNPWTTTLADLK(bi)NINNSMK_;_GLNEQHVNPWTTTLADLK(bi)NINNSMK_;_GLNEQHVNPWTTTLADLK(bi)NINNSMK_;_GLNEQHVNPWTTTLADLK(bi)NINNSMK_;_GLNEQHVNPWTTTLADLK(bi)NINNSMK_;_GLNEQHVNPWTTTLADLK(bi)NINNSM(ox)K_	0.37694	0.399436	0.532263	23.5291	24.3028	22.474	23.018	22.9424	22.7486
PF3D7_0202000	Plasmodium falciparum 3D7	knob-associated histidine-rich protein	KAHRP	Previous IDs: PF02_0020;PFB0100c	1	0	Biotin (K)	0	1	3	152;157	NA	EARPGGGFKAYEEKYESK	_EARPGGGFK(bi)AYEEKYESK_;_EARPGGGFK(bi)AYEEKYESK_;_EARPGGGFKAYEEK(bi)YESK_;_EARPGGGFK(bi)AYEEKYESK_;_EARPGGGFKAYEEK(bi)YESK_;_EARPGGGFK(bi)AYEEKYESK_;_EARPGGGFK(bi)AYEEKYESK_;_EARPGGGFK(bi)AYEEKYESK_;_EARPGGGFKAYEEK(bi)YESK_;_EARPGGGFKAYEEK(bi)YESK_;_EARPGGGFK(bi)AYEEKYESK_;_EARPGGGFK(bi)AYEEKYESK_;_EARPGGGFK(bi)AYEEKYESK_;_EARPGGGFKAYEEK(bi)YESK_;_EARPGGGFKAYEEK(bi)YESK_;_EARPGGGFKAYEEK(bi)YESK_…	0.00800208	1.92824	0.529323	27.7223	27.5678	27.7319	27.2455	27.2314	26.9572
Q08495	Homo sapiens (Human)	Dematin (Dematin actin-binding protein) (Erythrocyte membrane protein band 4.9)	DMTN DMT EPB49	NA	0	1	2 Oxidation (M);Biotin (K)	0	1	1	254	NA	MILKEEMEK	_MILK(bi)EEM(ox)EK_;_M(ox)ILK(bi)EEMEK_;_MILK(bi)EEM(ox)EK_;_M(ox)ILK(bi)EEMEK_;_MILK(bi)EEM(ox)EK_;_M(ox)ILK(bi)EEMEK_;_MILK(bi)EEM(ox)EK_;_M(ox)ILK(bi)EEMEK_;_MILK(bi)EEM(ox)EK_;_M(ox)ILK(bi)EEMEK_;_MILK(bi)EEM(ox)EK_;_M(ox)ILK(bi)EEMEK_;_M(ox)ILK(bi)EEMEK_;_M(ox)ILK(bi)EEMEK_;_MILK(bi)EEM(ox)EK_;_M(ox)ILK(bi)EEMEK_;_M(ox)ILK(bi)EEMEK_;_M(ox)ILK(bi)EEMEK_;_M(ox)ILK(bi)EEMEK_;_MILK(bi)EEM(ox)EK_…	0.0206705	1.57726	0.526366	20.686	20.782	21.0073	20.2096	20.1782	20.5084
Q08495	Homo sapiens (Human)	Dematin (Dematin actin-binding protein) (Erythrocyte membrane protein band 4.9)	DMTN DMT EPB49	NA	0	1	Biotin (K)	0	1	1	250	NA	VTSNLGKMILK	_VTSNLGK(bi)MILK_;_VTSNLGK(bi)MILK_;_VTSNLGK(bi)MILK_;_VTSNLGK(bi)MILK_;_VTSNLGK(bi)MILK_;_VTSNLGK(bi)MILK_;_VTSNLGK(bi)MILK_;_VTSNLGK(bi)MILK_;_VTSNLGK(bi)MILK_;_VTSNLGK(bi)MILK_;_VTSNLGK(bi)MILK_;_VTSNLGK(bi)MILK_	0.0200163	1.58998	0.503606	22.6814	22.3848	22.4237	22.0242	21.8116	22.1433
PF3D7_0905400	Plasmodium falciparum 3D7	high molecular weight rhoptry protein 3	RhopH3	Previous IDs: PFI0265c	1	0	Biotin (K)	0	1	1	852	NA	GLEFYKSSLK	_GLEFYK(bi)SSLK_;_GLEFYK(bi)SSLK_;_GLEFYK(bi)SSLK_;_GLEFYK(bi)SSLK_;_GLEFYK(bi)SSLK_;_GLEFYK(bi)SSLK_;_GLEFYK(bi)SSLK_;_GLEFYK(bi)SSLK_;_GLEFYK(bi)SSLK_;_GLEFYK(bi)SSLK_;_GLEFYK(bi)SSLK_;_GLEFYK(bi)SSLK_;_GLEFYK(bi)SSLK_;_GLEFYK(bi)SSLK_;_GLEFYK(bi)SSLK_;_GLEFYK(bi)SSLK_;_GLEFYK(bi)SSLK_;_GLEFYK(bi)SSLK_	0.00108169	2.61546	0.501496	25.8463	25.7666	25.9246	25.3946	25.2695	25.369
PF3D7_0801000	Plasmodium falciparum 3D7	Plasmodium exported protein (PHISTc)	N/A	Previous IDs: PF08_0137	1	0	Biotin (K)	0	1	1	436	NA	KGLNEQHVNPWTTTLADLK	_K(bi)GLNEQHVNPWTTTLADLK_;_K(bi)GLNEQHVNPWTTTLADLK_;_K(bi)GLNEQHVNPWTTTLADLK_;_K(bi)GLNEQHVNPWTTTLADLK_;_K(bi)GLNEQHVNPWTTTLADLK_;_K(bi)GLNEQHVNPWTTTLADLK_;_K(bi)GLNEQHVNPWTTTLADLK_;_K(bi)GLNEQHVNPWTTTLADLK_;_K(bi)GLNEQHVNPWTTTLADLK_;_K(bi)GLNEQHVNPWTTTLADLK_;_K(bi)GLNEQHVNPWTTTLADLK_;_K(bi)GLNEQHVNPWTTTLADLK_;_K(bi)GLNEQHVNPWTTTLADLK_;_K(bi)GLNEQHVNPWTTTLADLK_;_K(bi)GLNEQHVNPWTTTLADLK_;_K(bi)GLN…	0.312026	0.478772	0.492669	25.2013	25.7641	24.6901	24.6587	24.2565	25.2623
PF3D7_1108600	Plasmodium falciparum 3D7	endoplasmic reticulum-resident calcium binding protein	ERC	Previous IDs: PF11_0098	1	0	Biotin (K)	0	1	3	300	NA	IAVTSLTDYGDVIRYPEDFKLDIGKNVILPTAR	_IAVTSLTDYGDVIRYPEDFKLDIGK(bi)NVILPTAR_;_IAVTSLTDYGDVIRYPEDFKLDIGK(bi)NVILPTAR_;_IAVTSLTDYGDVIRYPEDFKLDIGK(bi)NVILPTAR_;_IAVTSLTDYGDVIRYPEDFKLDIGK(bi)NVILPTAR_;_IAVTSLTDYGDVIRYPEDFKLDIGK(bi)NVILPTAR_;_IAVTSLTDYGDVIRYPEDFKLDIGK(bi)NVILPTAR_;_IAVTSLTDYGDVIRYPEDFKLDIGK(bi)NVILPTAR_;_IAVTSLTDYGDVIRYPEDFKLDIGK(bi)NVILPTAR_;_IAVTSLTDYGDVIRYPEDFKLDIGK(bi)NVILPTAR_;_IAVTSLTDYGDVIRYPEDFKLDIGK(bi)NVILPTAR_	0.0395053	1.32403	0.490058	23.5173	23.1776	23.3475	22.5985	22.9681	23.0056
P11171	Homo sapiens (Human)	Protein 4.1 (P4.1) (4.1R) (Band 4.1) (EPB4.1) (Erythrocyte membrane protein band 4.1)	EPB41 E41P	NA	0	1	Biotin (K)	0	1	1	689;690	NA	HHASISELKK	_HHASISELK(bi)K_;_HHASISELKK(bi)_;_HHASISELK(bi)K_;_HHASISELK(bi)K_;_HHASISELK(bi)K_;_HHASISELK(bi)K_;_HHASISELKK(bi)_;_HHASISELKK(bi)_;_HHASISELK(bi)K_;_HHASISELKK(bi)_;_HHASISELK(bi)K_;_HHASISELK(bi)K_;_HHASISELK(bi)K_;_HHASISELK(bi)K_;_HHASISELK(bi)K_;_HHASISELK(bi)K_;_HHASISELK(bi)K_;_HHASISELKK(bi)_;_HHASISELKK(bi)_;_HHASISELKK(bi)_;_HHASISELK(bi)K_;_HHASISELKK(bi)_;_HHASISELKK(bi)_;_HHASISE…	0.0445594	1.27523	0.486123	23.3415	23.3235	23.6053	22.6639	23.1366	23.0114
PF3D7_0801000	Plasmodium falciparum 3D7	Plasmodium exported protein (PHISTc)	N/A	Previous IDs: PF08_0137	1	0	Biotin (K)	0	1	1	505	NA	LQSVEGKNFFEGR	_LQSVEGK(bi)NFFEGR_;_LQSVEGK(bi)NFFEGR_;_LQSVEGK(bi)NFFEGR_;_LQSVEGK(bi)NFFEGR_;_LQSVEGK(bi)NFFEGR_;_LQSVEGK(bi)NFFEGR_;_LQSVEGK(bi)NFFEGR_;_LQSVEGK(bi)NFFEGR_;_LQSVEGK(bi)NFFEGR_;_LQSVEGK(bi)NFFEGR_;_LQSVEGK(bi)NFFEGR_;_LQSVEGK(bi)NFFEGR_;_LQSVEGK(bi)NFFEGR_;_LQSVEGK(bi)NFFEGR_;_LQSVEGK(bi)NFFEGR_;_LQSVEGK(bi)NFFEGR_;_LQSVEGK(bi)NFFEGR_;_LQSVEGK(bi)NFFEGR_;_LQSVEGK(bi)NFFEGR_;_LQSVEGK(bi)NFFEGR_…	0.0118689	1.78191	0.474246	27.6964	27.6316	27.7319	27.0812	27.4182	27.1377
PF3D7_0532400	Plasmodium falciparum 3D7	lysine-rich membrane-associated PHISTb protein	LyMP	Previous IDs: MAL5P1.315;PFE1605w	1	0	Biotin (K)	0	1	1	465	NA	VGSKNTK	_VGSK(bi)NTK_;_VGSK(bi)NTK_;_VGSK(bi)NTK_;_VGSK(bi)NTK_;_VGSK(bi)NTK_;_VGSK(bi)NTK_	0.220755	0.62246	0.465944	20.3421	19.6801	20.6331	19.8771	19.9346	19.4457
PF3D7_0201900	Plasmodium falciparum 3D7	erythrocyte membrane protein 3	EMP3	Previous IDs: PF02_0019;PFB0095c	1	0	Biotin (K)	0	1	1	1447;1746;1824;1889;2019;2084;2201;2240;2279	NA	QQNTGLKNAANK	_QQNTGLK(bi)NAANK_;_QQNTGLK(bi)NAANK_;_QQNTGLK(bi)NAANK_;_QQNTGLK(bi)NAANK_;_QQNTGLK(bi)NAANK_;_QQNTGLK(bi)NAANK_;_QQNTGLK(bi)NAANK_;_QQNTGLK(bi)NAANK_	0.514626	0.273696	0.463918	20.0551	19.9847	20.0569	18.4234	20.6712	19.6105
P00915	Homo sapiens (Human)	Carbonic anhydrase 1 (EC 4.2.1.1) (Carbonate dehydratase I) (Carbonic anhydrase B) (CAB) (Carbonic anhydrase I) (CA-I)	CA1	NA	0	1	Biotin (K);Oxidation (M)	0	1	1	138	NA	YSSLAEAASKADGLAVIGVLMK	_YSSLAEAASK(bi)ADGLAVIGVLM(ox)K_;_YSSLAEAASK(bi)ADGLAVIGVLM(ox)K_;_YSSLAEAASK(bi)ADGLAVIGVLM(ox)K_;_YSSLAEAASK(bi)ADGLAVIGVLM(ox)K_;_YSSLAEAASK(bi)ADGLAVIGVLM(ox)K_;_YSSLAEAASK(bi)ADGLAVIGVLM(ox)K_;_YSSLAEAASK(bi)ADGLAVIGVLM(ox)K_;_YSSLAEAASK(bi)ADGLAVIGVLM(ox)K_;_YSSLAEAASK(bi)ADGLAVIGVLM(ox)K_;_YSSLAEAASK(bi)ADGLAVIGVLM(ox)K_;_YSSLAEAASK(bi)ADGLAVIGVLM(ox)K_;_YSSLAEAASK(bi)ADGLAVIGVLMK_;_YSSLAE…	0.270963	0.537982	0.455123	24.5581	25.1171	24.258	24.5267	23.6948	24.3463
PF3D7_0500800	Plasmodium falciparum 3D7	mature parasite-infected erythrocyte surface antigen	MESA	Previous IDs: MAL5P1.9;PFE0040c	1	0	Biotin (K)	0	1	3	466	NA	KKHKFLR	_KKHK(bi)FLR_;_KKHK(bi)FLR_;_KKHK(bi)FLR_;_KKHK(bi)FLR_;_KKHK(bi)FLR_;_KKHK(bi)FLR_	0.057932	1.16889	0.454854	19.524	19.3318	19.6763	19.1895	19.204	18.7739
PF3D7_1102500	Plasmodium falciparum 3D7	gametocyte exported protein 2	GEXP02	Previous IDs: PF11_0037	1	0	Biotin (K)	0	1	2	127	NA	STNKVDVIFDKK	_STNK(bi)VDVIFDKK_;_STNK(bi)VDVIFDKK_;_STNK(bi)VDVIFDKK_;_STNK(bi)VDVIFDKK_;_STNK(bi)VDVIFDKK_;_STNK(bi)VDVIFDKK_;_STNK(bi)VDVIFDKK_;_STNK(bi)VDVIFDKK_;_STNK(bi)VDVIFDKK_;_STNK(bi)VDVIFDKK_;_STNK(bi)VDVIFDKK_;_STNK(bi)VDVIFDKK_	0.147491	0.78806	0.447209	22.8304	22.0804	22.1204	21.997	21.813	21.8796
PF3D7_0730900	Plasmodium falciparum 3D7	EMP1-trafficking protein	PTP4	Previous IDs: MAL7P1.171	1	0	Biotin (K)	0	1	3	1962;2006;2050;1964;2008;2052;1953;1997;2041	NA	TLGKHEHHEEYVKGKFVDNR	_TLGKHEHHEEYVK(bi)GK(bi)FVDNR_;_TLGKHEHHEEYVK(bi)GK(bi)FVDNR_;_TLGKHEHHEEYVK(bi)GK(bi)FVDNR_;_TLGKHEHHEEYVK(bi)GK(bi)FVDNR_;_TLGKHEHHEEYVK(bi)GK(bi)FVDNR_;_TLGKHEHHEEYVK(bi)GK(bi)FVDNR_;_TLGKHEHHEEYVK(bi)GK(bi)FVDNR_;_TLGKHEHHEEYVK(bi)GK(bi)FVDNR_;_TLGKHEHHEEYVK(bi)GK(bi)FVDNR_;_TLGKHEHHEEYVK(bi)GK(bi)FVDNR_;_TLGKHEHHEEYVK(bi)GK(bi)FVDNR_;_TLGKHEHHEEYVK(bi)GK(bi)FVDNR_;_TLGKHEHHEEYVK(bi)GK(bi)FVD…	0.675765	0.162038	0.439359	20.9428	22.2734	23.2384	20.7392	23.1021	21.2951
PF3D7_1477000	Plasmodium falciparum 3D7	Plasmodium exported protein (hyp17), unknown function, pseudogene	N/A	Previous IDs: PF14_0740;pf14_0741	1	0	Biotin (K)	0	1	1		NA	SGLKHNTNK	_SGLK(bi)HNTNK_;_SGLK(bi)HNTNK_;_SGLK(bi)HNTNK_;_SGLK(bi)HNTNK_;_SGLK(bi)HNTNK_;_SGLK(bi)HNTNK_	0.63809	0.185299	0.420116	18.5044	18.8787	18.6218	16.6447	19.3423	18.7577
PF3D7_1478600	Plasmodium falciparum 3D7	EMP1-trafficking protein	PTP3	Previous IDs: PF14_0758	1	0	Biotin (K)	0	1	1	1011	NA	SGLKHNTNK	_SGLK(bi)HNTNK_;_SGLK(bi)HNTNK_;_SGLK(bi)HNTNK_;_SGLK(bi)HNTNK_;_SGLK(bi)HNTNK_;_SGLK(bi)HNTNK_	0.63809	0.185299	0.420116	18.5044	18.8787	18.6218	16.6447	19.3423	18.7577
PF3D7_0801000	Plasmodium falciparum 3D7	Plasmodium exported protein (PHISTc)	N/A	Previous IDs: PF08_0137	1	0	Biotin (K)	0	1	3	485;488;491;492	NA	SCDIIKPSKFNKK	_SCDIIK(bi)PSKFNKK_;_SCDIIKPSK(bi)FNKK_;_SCDIIKPSKFNK(bi)K_;_SCDIIKPSK(bi)FNKK_;_SCDIIK(bi)PSKFNKK_;_SCDIIKPSKFNK(bi)K_;_SCDIIKPSK(bi)FNKK_;_SCDIIKPSK(bi)FNKK_;_SCDIIK(bi)PSKFNKK_;_SCDIIKPSK(bi)FNKK_;_SCDIIKPSKFNK(bi)K_;_SCDIIK(bi)PSKFNKK_;_SCDIIK(bi)PSKFNKK_;_SCDIIKPSKFNKK(bi)_;_SCDIIKPSKFNKK(bi)_;_SCDIIKPSK(bi)FNKK_;_SCDIIKPSKFNK(bi)K_;_SCDIIKPSK(bi)FNKK_;_SCDIIKPSK(bi)FNKK_;_SCDIIKPSKFNK(bi)K_…	0.114794	0.891511	0.412023	25.2013	25.0187	25.1199	24.8582	24.3078	24.9378
PF3D7_0905400	Plasmodium falciparum 3D7	high molecular weight rhoptry protein 3	RhopH3	Previous IDs: PFI0265c	1	0	Biotin (K)	0	1	1	846	NA	KGLEFYK	_K(bi)GLEFYK_;_K(bi)GLEFYK_;_K(bi)GLEFYK_;_K(bi)GLEFYK_;_K(bi)GLEFYK_;_K(bi)GLEFYK_;_K(bi)GLEFYK_;_K(bi)GLEFYK_;_K(bi)GLEFYK_;_K(bi)GLEFYK_;_K(bi)GLEFYK_;_K(bi)GLEFYK_	0.0564158	1.17965	0.392066	25.266	25.3841	25.6514	24.8724	25.0578	25.195
P35612	Homo sapiens (Human)	Beta-adducin (Erythrocyte adducin subunit beta)	ADD2 ADDB	NA	0	1	Biotin (K)	0	1	2	628	NA	SLEEGTKKTETSK	_SLEEGTKK(bi)TETSK_;_SLEEGTKK(bi)TETSK_;_SLEEGTKK(bi)TETSK_;_SLEEGTKK(bi)TETSK_;_SLEEGTKK(bi)TETSK_;_SLEEGTKK(bi)TETSK_	0.481958	0.300837	0.390602	19.3902	19.0263	19.8157	19.1782	19.7083	18.174
PF3D7_0532300	Plasmodium falciparum 3D7	Plasmodium exported protein (PHISTb), unknown function	N/A	Previous IDs: MAL5P1.314;PFE1600w	1	0	Biotin (K)	0	1	1	356	NA	TLLEKYAITDDYSPPDVFGK	_TLLEK(bi)YAITDDYSPPDVFGK_;_TLLEK(bi)YAITDDYSPPDVFGK_;_TLLEK(bi)YAITDDYSPPDVFGK_;_TLLEK(bi)YAITDDYSPPDVFGK_;_TLLEK(bi)YAITDDYSPPDVFGK_;_TLLEK(bi)YAITDDYSPPDVFGK_;_TLLEK(bi)YAITDDYSPPDVFGK_;_TLLEK(bi)YAITDDYSPPDVFGK_;_TLLEK(bi)YAITDDYSPPDVFGK_;_TLLEK(bi)YAITDDYSPPDVFGK_;_TLLEK(bi)YAITDDYSPPDVFGK_;_TLLEK(bi)YAITDDYSPPDVFGK_;_TLLEK(bi)YAITDDYSPPDVFGK_;_TLLEK(bi)YAITDDYSPPDVFGK_;_TLLEK(bi)YAITDDYSPPD…	0.0341462	1.38057	0.374533	29.0455	29.409	29.1262	28.8813	28.8406	28.7352
PF3D7_1477500	Plasmodium falciparum 3D7	Plasmodium exported protein (PHISTb), unknown function	N/A	Previous IDs: PF14_0746	1	0	Biotin (K)	0	1	1	328	NA	SKGGNPLFFK	_SK(bi)GGNPLFFK_;_SK(bi)GGNPLFFK_;_SK(bi)GGNPLFFK_;_SK(bi)GGNPLFFK_;_SK(bi)GGNPLFFK_;_SK(bi)GGNPLFFK_;_SK(bi)GGNPLFFK_;_SK(bi)GGNPLFFK_;_SK(bi)GGNPLFFK_;_SK(bi)GGNPLFFK_;_SK(bi)GGNPLFFK_;_SK(bi)GGNPLFFK_;_SK(bi)GGNPLFFK_	0.0716441	1.08451	0.368479	24.0212	23.9843	24.0881	23.5146	23.5143	23.9593
P02730	Homo sapiens (Human)	Band 3 anion transport protein (Anion exchange protein 1) (AE 1) (Anion exchanger 1) (Solute carrier family 4 member 1) (CD antigen CD233)	SLC4A1 AE1 DI EPB3	NA	0	1	Biotin (K)	0	1	1	353;360	NA	YQSSPAKPDSSFYK	_YQSSPAK(bi)PDSSFYK_;_YQSSPAK(bi)PDSSFYK_;_YQSSPAK(bi)PDSSFYK_;_YQSSPAK(bi)PDSSFYK_;_YQSSPAK(bi)PDSSFYK_;_YQSSPAK(bi)PDSSFYK_;_YQSSPAK(bi)PDSSFYK_;_YQSSPAK(bi)PDSSFYK_;_YQSSPAK(bi)PDSSFYK_;_YQSSPAK(bi)PDSSFYK_;_YQSSPAK(bi)PDSSFYK_;_YQSSPAK(bi)PDSSFYK_;_YQSSPAK(bi)PDSSFYK_;_YQSSPAK(bi)PDSSFYK_;_YQSSPAK(bi)PDSSFYK_;_YQSSPAK(bi)PDSSFYK_;_YQSSPAK(bi)PDSSFYK_;_YQS(ph)S(ph)PAKPDS(ph)S(ph)FY(ph)K(bi)_	0.206941	0.649473	0.360723	25.3646	26.0687	25.6426	25.459	25.0816	25.4532
P11171	Homo sapiens (Human)	Protein 4.1 (P4.1) (4.1R) (Band 4.1) (EPB4.1) (Erythrocyte membrane protein band 4.1)	EPB41 E41P	NA	0	1	Biotin (K)	0	1	2	673;679	NA	HSNLMLEDLDKSQEEIKK	_HSNLMLEDLDK(bi)SQEEIKK_;_HSNLMLEDLDKSQEEIK(bi)K_;_HSNLMLEDLDKSQEEIK(bi)K_;_HSNLMLEDLDK(bi)SQEEIKK_;_HSNLMLEDLDKSQEEIK(bi)K_;_HSNLMLEDLDK(bi)SQEEIKK_;_HSNLMLEDLDK(bi)SQEEIKK_;_HSNLMLEDLDKSQEEIK(bi)K_;_HSNLMLEDLDK(bi)SQEEIKK_;_HSNLMLEDLDKSQEEIK(bi)K_;_HSNLMLEDLDK(bi)SQEEIKK_;_HSNLMLEDLDKSQEEIK(bi)K_;_HSNLMLEDLDK(bi)SQEEIKK_;_HSNLMLEDLDK(bi)SQEEIKK_;_HSNLMLEDLDK(bi)SQEEIKK_;_HSNLMLEDLDK(bi)SQEEIKK_…	0.547252	0.248337	0.360439	22.3492	24.1171	23.7607	22.85	23.1592	23.1365
PF3D7_0532300	Plasmodium falciparum 3D7	Plasmodium exported protein (PHISTb), unknown function	N/A	Previous IDs: MAL5P1.314;PFE1600w	1	0	Biotin (K);Oxidation (M)	0	1	1	438	NA	EMESKVEK	_EMESK(bi)VEK_;_EMESK(bi)VEK_;_EMESK(bi)VEK_;_EMESK(bi)VEK_;_EMESK(bi)VEK_;_EMESK(bi)VEK_;_EMESK(bi)VEK_;_EMESK(bi)VEK_;_EMESK(bi)VEK_;_EMESK(bi)VEK_;_EMESK(bi)VEK_;_EMESK(bi)VEK_;_EMESK(bi)VEK_;_EMESK(bi)VEK_;_EMESK(bi)VEK_;_EMESK(bi)VEK_;_EMESK(bi)VEK_;_EMESK(bi)VEK_;_EMESK(bi)VEK_;_EMESK(bi)VEK_;_EMESK(bi)VEK_;_EMESK(bi)VEK_;_EMESK(bi)VEK_;_EMESK(bi)VEK_;_EMESK(bi)VEK_;_EMESK(bi)VEK_;_EMESK(bi…	0.266385	0.544689	0.355606	23.0695	23.5751	23.995	23.0798	23.3078	23.1851
PF3D7_1334500	Plasmodium falciparum 3D7	MSP7-like protein	MSRP6	Previous IDs: PF13_0192	1	0	Biotin (K)	0	1	2	444	NA	KNNDLPQYEESNKTYK	_K(bi)NNDLPQYEESNKTYK_;_K(bi)NNDLPQYEESNKTYK_;_K(bi)NNDLPQYEESNKTYK_;_K(bi)NNDLPQYEESNKTYK_;_K(bi)NNDLPQYEESNKTYK_;_K(bi)NNDLPQYEESNKTYK_;_K(bi)NNDLPQYEESNKTYK_;_K(bi)NNDLPQYEESNKTYK_;_K(bi)NNDLPQYEESNKTYK_;_K(bi)NNDLPQYEESNKTYK_;_K(bi)NNDLPQYEESNKTYK_;_K(bi)NNDLPQYEESNKTYK_	0.0956735	0.964441	0.354556	22.6331	22.626	22.1623	22.2167	22.0605	22.0805
PF3D7_0532300	Plasmodium falciparum 3D7	Plasmodium exported protein (PHISTb), unknown function	N/A	Previous IDs: MAL5P1.314;PFE1600w	1	0	Biotin (K)	0	1	1	351	NA	NYSTHENTYPTLKTLLEK	_NYSTHENTYPTLK(bi)TLLEK_;_NYSTHENTYPTLK(bi)TLLEK_;_NYSTHENTYPTLK(bi)TLLEK_;_NYSTHENTYPTLK(bi)TLLEK_;_NYSTHENTYPTLK(bi)TLLEK_;_NYSTHENTYPTLK(bi)TLLEK_;_NYSTHENTYPTLK(bi)TLLEK_;_NYSTHENTYPTLK(bi)TLLEK_;_NYSTHENTYPTLK(bi)TLLEK_;_NYSTHENTYPTLK(bi)TLLEK_;_NYSTHENTYPTLK(bi)TLLEK_;_NYSTHENTYPTLK(bi)TLLEK_;_NYSTHENTYPTLK(bi)TLLEK_;_NYSTHENTYPTLK(bi)TLLEK_;_NYSTHENTYPTLK(bi)TLLEK_;_NYSTHENTYPTLK(bi)TLLEK_…	0.28119	0.522928	0.347376	26.9197	26.2993	26.0086	26.1763	25.9194	26.0898
PF3D7_0730900	Plasmodium falciparum 3D7	EMP1-trafficking protein	PTP4	Previous IDs: MAL7P1.171	1	0	Biotin (K)	0	1	2	783;893;915;782;892;914	NA	NNFDGCLKKEVSVPR	_NNFDGCLKK(bi)EVSVPR_;_NNFDGCLK(bi)KEVSVPR_;_NNFDGCLKK(bi)EVSVPR_;_NNFDGCLKK(bi)EVSVPR_;_NNFDGCLKK(bi)EVSVPR_;_NNFDGCLKK(bi)EVSVPR_;_NNFDGCLKK(bi)EVSVPR_;_NNFDGCLKK(bi)EVSVPR_;_NNFDGCLKK(bi)EVSVPR_;_NNFDGCLKK(bi)EVSVPR_;_NNFDGCLKK(bi)EVSVPR_;_NNFDGCLKK(bi)EVSVPR_;_NNFDGCLKK(bi)EVSVPR_;_NNFDGCLKK(bi)EVSVPR_;_NNFDGCLKK(bi)EVSVPR_;_NNFDGCLKK(bi)EVSVPR_;_NNFDGCLKK(bi)EVSVPR_;_NNFDGCLKK(bi)EVSVPR_;_NN…	0.323449	0.463845	0.341309	26.6634	26.2852	26.3682	25.5446	26.4586	26.2897
PF3D7_0730900	Plasmodium falciparum 3D7	EMP1-trafficking protein	PTP4	Previous IDs: MAL7P1.171	1	0	Biotin (K)	0	1	3	767;877;774;884	NA	EISTPKNYVSEFKNNFDGCLKK	_EISTPK(bi)NYVSEFKNNFDGCLKK_;_EISTPK(bi)NYVSEFKNNFDGCLKK_;_EISTPK(bi)NYVSEFKNNFDGCLKK_;_EISTPK(bi)NYVSEFKNNFDGCLKK_;_EISTPK(bi)NYVSEFKNNFDGCLKK_;_EISTPK(bi)NYVSEFKNNFDGCLKK_;_EISTPK(bi)NYVSEFKNNFDGCLKK_;_EISTPK(bi)NYVSEFKNNFDGCLKK_;_EISTPK(bi)NYVSEFKNNFDGCLKK_;_EISTPK(bi)NYVSEFKNNFDGCLKK_;_EISTPK(bi)NYVSEFKNNFDGCLKK_;_EISTPK(bi)NYVSEFKNNFDGCLKK_;_EISTPK(bi)NYVSEFKNNFDGCLKK_;_EISTPK(bi)NYVSEFKNNFD…	0.0178561	1.62949	0.324363	23.6089	23.8572	23.6114	23.3879	23.3768	23.3398
Q14847	Homo sapiens (Human)	LIM and SH3 domain protein 1 (LASP-1) (Metastatic lymph node gene 50 protein) (MLN 50)	LASP1 MLN50	NA	0	1	Biotin (K)	0	1	2	23;17;27	NA	IVYPTEKVNCLDKFWHK	_IVYPTEKVNCLDK(bi)FWHK_;_IVYPTEKVNCLDK(bi)FWHK_;_IVYPTEK(bi)VNCLDKFWHK_;_IVYPTEKVNCLDK(bi)FWHK_;_IVYPTEK(bi)VNCLDKFWHK_;_IVYPTEK(bi)VNCLDKFWHK_;_IVYPTEKVNCLDKFWHK(bi)_;_IVYPTEK(bi)VNCLDKFWHK_;_IVYPTEKVNCLDK(bi)FWHK_;_IVYPTEKVNCLDK(bi)FWHK_;_IVYPTEK(bi)VNCLDKFWHK_;_IVYPTEKVNCLDK(bi)FWHK_;_IVYPTEKVNCLDK(bi)FWHK_;_IVYPTEK(bi)VNCLDKFWHK_;_IVYPTEK(bi)VNCLDKFWHK_;_IVYPTEK(bi)VNCLDKFWHK_;_IVYPTEKVNCLDK(…	0.461956	0.3179	0.313981	22.6943	23.158	22.3626	22.9611	22.4243	21.8876
[truncated: 656 more rows]
