# Supplementary material for: PerTurboID, a targeted in situ method reveals the impact of kinase deletion on its local protein environment in the cytoadhesion complex of malaria-causing parasites
Source: eLife. 2023 Sep 22;12:e86367. doi: 10.7554/eLife.86367 (PMC10564455; doi:10.7554/eLife.86367)
Supplement: Supplementary file 9. [file elife-86367-supp9.xlsx]

## Sheet: Sheet1
Supplementary Table 9: All peptides for which both phosphorylated and non-phosphorylated peptides were detected in either KAHRP or PTP4-turboID datasets. Non-phosphorylated/phosphorylated ratios are shown to indicate the change in phosphorylation upon FIKK4.1 deletion. This assumes there is no change in biotinylation accessibility for the peptide.
Gene	Organism	Protein name	Gene Name	Previous ID(s) (for PF)	Biotinylation Position	L2FC_KAHRP_NOPHOS	L2FC_KAHRP_PHOS	L2FC_PTP4_NOPHOS	L2FC_PTP4_PHOS	Ratio KAHRP NOPHOS-PHOS	Ratio PTP4 NOPHOS-PHOS
P11171	Homo sapiens (Human)	Protein 4.1 (P4.1) (4.1R) (Band 4.1) (EPB4.1) (Erythrocyte membrane protein band 4.1)	EPB41 E41P		852	0.210571	0.277468	1.19879	0.241562	-0.0668971	0.95723
PF3D7_0202000	Plasmodium falciparum 3D7	knob-associated histidine-rich protein	KAHRP	Previous IDs: PF02_0020;PFB0100c	351	0.837464	-3.45132	2.26775	-2.92763	4.28878	5.19538
PF3D7_0202000	Plasmodium falciparum 3D7	knob-associated histidine-rich protein	KAHRP	Previous IDs: PF02_0020;PFB0100c	354	-0.0629367	-3.45132	1.91525	-2.92763	3.38838	4.84288
PF3D7_0202000	Plasmodium falciparum 3D7	knob-associated histidine-rich protein	KAHRP	Previous IDs: PF02_0020;PFB0100c	359	-0.101303	-3.15383	1.40278	-3.32329	3.05253	4.72607
PF3D7_0202000	Plasmodium falciparum 3D7	knob-associated histidine-rich protein	KAHRP	Previous IDs: PF02_0020;PFB0100c	364	1.0819	-3.15383	1.22769	-3.32329	4.23573	4.55097
PF3D7_0202000	Plasmodium falciparum 3D7	knob-associated histidine-rich protein	KAHRP	Previous IDs: PF02_0020;PFB0100c	541	-0.0980685	-0.408232	0.260246	NA	0.310164	NA
PF3D7_0202000	Plasmodium falciparum 3D7	knob-associated histidine-rich protein	KAHRP	Previous IDs: PF02_0020;PFB0100c	545	-0.0635337	-1.15443	0.260246	NA	1.0909	NA
PF3D7_0202000	Plasmodium falciparum 3D7	knob-associated histidine-rich protein	KAHRP	Previous IDs: PF02_0020;PFB0100c	551	-0.0556369	-1.25274	NA	NA	1.1971	NA
PF3D7_0202000	Plasmodium falciparum 3D7	knob-associated histidine-rich protein	KAHRP	Previous IDs: PF02_0020;PFB0100c	555	-0.095598	-0.927506	NA	NA	0.831908	NA
PF3D7_0202000	Plasmodium falciparum 3D7	knob-associated histidine-rich protein	KAHRP	Previous IDs: PF02_0020;PFB0100c	561	-0.134076	-0.602272	NA	NA	0.468197	NA
PF3D7_0202000	Plasmodium falciparum 3D7	knob-associated histidine-rich protein	KAHRP	Previous IDs: PF02_0020;PFB0100c	565	-0.0698379	-0.597759	NA	NA	0.527921	NA
PF3D7_0202000	Plasmodium falciparum 3D7	knob-associated histidine-rich protein	KAHRP	Previous IDs: PF02_0020;PFB0100c	571	-0.249251	-0.459349	NA	NA	0.210098	NA
PF3D7_0202000	Plasmodium falciparum 3D7	knob-associated histidine-rich protein	KAHRP	Previous IDs: PF02_0020;PFB0100c	575	-0.232046	-0.537523	NA	NA	0.305477	NA
PF3D7_0202000	Plasmodium falciparum 3D7	knob-associated histidine-rich protein	KAHRP	Previous IDs: PF02_0020;PFB0100c	581	-0.217638	-0.519094	NA	NA	0.301456	NA
PF3D7_0202000	Plasmodium falciparum 3D7	knob-associated histidine-rich protein	KAHRP	Previous IDs: PF02_0020;PFB0100c	585	-0.244845	-0.519094	NA	NA	0.274249	NA
PF3D7_0202000	Plasmodium falciparum 3D7	knob-associated histidine-rich protein	KAHRP	Previous IDs: PF02_0020;PFB0100c	595	-0.652014	-0.477296	NA	NA	-0.174718	NA
PF3D7_0202000	Plasmodium falciparum 3D7	knob-associated histidine-rich protein	KAHRP	Previous IDs: PF02_0020;PFB0100c	617	0.0403278	0.208681	NA	NA	-0.168353	NA
PF3D7_0202000	Plasmodium falciparum 3D7	knob-associated histidine-rich protein	KAHRP	Previous IDs: PF02_0020;PFB0100c	623	-0.168362	0.208681	NA	NA	-0.377042	NA
PF3D7_0702500	Plasmodium falciparum 3D7	Plasmodium exported protein, unknown function	N/A	Previous IDs: PF07_0008	227	2.28323	0.998688	1.82405	2.74452	1.28454	-0.920476
PF3D7_0730900	Plasmodium falciparum 3D7	EMP1-trafficking protein	PTP4	Previous IDs: MAL7P1.171	1883	1.14621	NA	0.483552	-1.71545	NA	2.199
PF3D7_0730900	Plasmodium falciparum 3D7	EMP1-trafficking protein	PTP4	Previous IDs: MAL7P1.171	1887	0.682528	NA	0.54334	-1.71545	NA	2.25879
PF3D7_0730900	Plasmodium falciparum 3D7	EMP1-trafficking protein	PTP4	Previous IDs: MAL7P1.171	1896	0.95437	NA	0.628158	-1.71545	NA	2.34361
PF3D7_0730900	Plasmodium falciparum 3D7	EMP1-trafficking protein	PTP4	Previous IDs: MAL7P1.171	1949	1.01206	NA	0.393067	-1.71545	NA	2.10852
PF3D7_0730900	Plasmodium falciparum 3D7	EMP1-trafficking protein	PTP4	Previous IDs: MAL7P1.171	1953	0.993673	NA	0.237101	-1.71545	NA	1.95255
PF3D7_0730900	Plasmodium falciparum 3D7	EMP1-trafficking protein	PTP4	Previous IDs: MAL7P1.171	1962	1.01778	NA	0.255587	-1.71545	NA	1.97104
PF3D7_0730900	Plasmodium falciparum 3D7	EMP1-trafficking protein	PTP4	Previous IDs: MAL7P1.171	1993	1.01206	NA	0.393067	-1.71545	NA	2.10852
PF3D7_0730900	Plasmodium falciparum 3D7	EMP1-trafficking protein	PTP4	Previous IDs: MAL7P1.171	1997	0.993673	NA	0.237101	-1.71545	NA	1.95255
PF3D7_0730900	Plasmodium falciparum 3D7	EMP1-trafficking protein	PTP4	Previous IDs: MAL7P1.171	2006	1.01778	NA	0.255587	-1.71545	NA	1.97104
PF3D7_0730900	Plasmodium falciparum 3D7	EMP1-trafficking protein	PTP4	Previous IDs: MAL7P1.171	2037	1.01206	NA	0.393067	-1.71545	NA	2.10852
PF3D7_0730900	Plasmodium falciparum 3D7	EMP1-trafficking protein	PTP4	Previous IDs: MAL7P1.171	2041	0.993673	NA	0.237101	-1.71545	NA	1.95255
PF3D7_0730900	Plasmodium falciparum 3D7	EMP1-trafficking protein	PTP4	Previous IDs: MAL7P1.171	2050	1.01778	NA	0.255587	-1.71545	NA	1.97104
PF3D7_0730900	Plasmodium falciparum 3D7	EMP1-trafficking protein	PTP4	Previous IDs: MAL7P1.171	2091	0.0425444	NA	0.406729	-0.60436	NA	1.01109
PF3D7_0730900	Plasmodium falciparum 3D7	EMP1-trafficking protein	PTP4	Previous IDs: MAL7P1.171	2102	0.424994	-2.86603	0.462235	NA	3.29103	NA
PF3D7_0801000	Plasmodium falciparum 3D7	Plasmodium exported protein (PHISTc)	N/A	Previous IDs: PF08_0137	156	0.294201	0.0213828	-0.218475	-0.161008	0.272818	-0.0574667
PF3D7_0801000	Plasmodium falciparum 3D7	Plasmodium exported protein (PHISTc)	N/A	Previous IDs: PF08_0137	165	0.345834	-0.0352656	-0.300495	-0.131631	0.3811	-0.168863
PF3D7_0801000	Plasmodium falciparum 3D7	Plasmodium exported protein (PHISTc)	N/A	Previous IDs: PF08_0137	166	0.139518	-0.0352656	-0.0966847	-0.131631	0.174784	0.0349467
PF3D7_0905400	Plasmodium falciparum 3D7	high molecular weight rhoptry protein 3	RhopH3	Previous IDs: PFI0265c	846	-0.874643	2.00886	-1.17025	NA	-2.8835	NA
PF3D7_0905400	Plasmodium falciparum 3D7	high molecular weight rhoptry protein 3	RhopH3	Previous IDs: PFI0265c	852	-1.34002	2.00886	-1.47651	NA	-3.34888	NA
PF3D7_1200700	Plasmodium falciparum 3D7	acyl-CoA synthetase	ACS7	Previous IDs: 2277.t00007;MAL12P1.7;PFL0035c	876	0.255393	-2.24639	1.19479	NA	2.50178	NA
