# Supplementary material for: PerTurboID, a targeted in situ method reveals the impact of kinase deletion on its local protein environment in the cytoadhesion complex of malaria-causing parasites
Source: eLife. 2023 Sep 22;12:e86367. doi: 10.7554/eLife.86367 (PMC10564455; doi:10.7554/eLife.86367)
Supplement: Supplementary file 10. [file elife-86367-supp10.xlsx]

## Sheet: Sheet1
Supplementary Table 9: Primers used for constructing plasmids and verifying the correct modification of parasite genomic DNA
Primers for the Construction of Plasmids
T2A_F	CAACCCCCTGCTGGGCCTGGACAGCACCGGATCCGGAGAAGGAAGAGGAAGTTTATTAAC
T2A_R	AATGAGGGTGGATTCTTCTTGAGACAAAGGCTTGGCCATTGGTCCTGGATTTTCTTCTAC
BSD_F	ATGGCCAAGCCTTTGTC
BSD_R	GCCCTCCCACACATAAC
PTP4_5HR_F	GAATTGATCGAGATCGTGAATTCATTGAAAAAGATGCTAATAGTGGTAG
PTP4_5HR_recod_R	CTTCCTAGGCATATGCTTATTAGTATTTGAACTCTGCACGTTTACTCCCTTCTCATGATG
PTP4_turbo_recod_F	TCAAATACTAATAAGCATATGCCTAGGAAGATGTTGAGGAAAGACAATACTGTGCCTCTG
TurboV5_R	GGTGCTGTCCAGGCC
PTP4_3UTR_F	CTGGTTATGTGTGGGAGGGCTAATAGCATGCCAAGAAAAATGTTAAG
PTP4_3UTR_R	ATGACCATGATTACGCCAAGCTGCAAGCTTCATTTTATTATTTTCTGGACAACAACC
KAHRP_5HR_F	CCAGTGAATTGATCGAGATCGTGAATTCCTCAAGGAGGAAAAACTGAC
KAHRP_5HR_R	TTGTCTTTTCCGCAACAACCCCTCTTTTTCTTTTTCTTTCCTGCTTCTTGTAATTG
KAHRP_turbo_F	GAAAAAGAAAAAGAGGGGTTGTTGCGGAAAAGACAATACTGTGCCTC
KAHRP_3hr_F	GTTATGTGTGGGAGGGCTAATAAATAATCTCTGCAGTTGATTC
KAHRP_3hr_R	ATGACCATGATTACGCCAAGCTGCAAGCTTTTCAGAATAACTCTTTTCTGTATAAACGTC
Cas9 guides
PTP4guide_F	attgGTTTGTTTGTGTTACTTGAT
PTP4guide_R	aaacATCAAGTAACACAAACAAAC
KAHRPguide_F	attgAGAAGAAAAGAGGATGCTG
KAHRPguide_R	aaacCAGCATCCTCTTTTCTTCT
FIKK4.1guide_F	attgAGGAATTATGTAAGCATCCC
FIKK4.1guide_R	aaacGGGATGCTTACATAATTCCT
Validation Primers
FIKK4.1_Ex1	TTCAACATATTTGAACCCAGAATC
FIKK4.1_Int5	CTTCTTGGGATCTACGATTG
FIKK4.1_rev_R	AATATATAAGATATTTTAATTAGGTATAC
PTP4_EX1_F	GAACAAGGGAACAAATGTTCCTG
kahrp_EX1_F	CTACACCAGGCGCAAAAG
PTP4_rev_R	GGTAAAATATTGACACGATATTATTTC
kahrp_rev_R	GAAAAGTATATTTTTCTCTATGATTCATG
GFP_R	CTTTTGTTTGTCTGCCATGATG
TurboID_R	CCTCTGCTTCCTCTCCC
